# Supplementary material for: Isocyanides inhibit bacterial pathogens by covalent targeting of essential metabolic enzymes
Source: Chem Sci. 2024 Jun 26;15(30):11946–55. doi: 10.1039/d4sc01940g (PMC11290450; doi:10.1039/d4sc01940g)
Supplement: SC-015-D4SC01940G-s002 [file SC-015-D4SC01940G-s002.xlsx]

## Sheet: Table_S5_Colony-A1
protein annotation						MS data				T-test				LFQ intensities
														Colony A.1				S. aureus NCTC 8325 wt.
Protein IDs	Majority protein IDs	Gene name	Protein name	Keywords	Mol. weight [kDa]	Razor + unique peptides	Sequence coverage [%]	Intensity	MS/MS count	Student's T-test Significant A1_wt	-Log Student's T-test p-value A1_wt	Student's T-test Difference A1_wt	Student's T-test q-value A1_wt	Replicate 1	Replicate 2	Replicate 3	Replicate 4	Replicate 1	Replicate 2	Replicate 3	Replicate 4
O05154	O05154	tagX	Putative glycosyltransferase TagX	Cellshape;Cellwallbiogenesis/degradation;Completeproteome;Glycosyltransferase;Referenceproteome;Teichoicacidbiosynthesis;Transferase	41.138	13	41.1	607480000	58		0.82293	0.251722	0.0756064	23.2755	23.3017	23.0824	23.1917	23.1888	22.7744	22.6551	23.226
O05204	O05204	ahpF	Alkyl hydroperoxide reductase subunit F	Completeproteome;Disulfidebond;FAD;Flavoprotein;NAD;NADP;Oxidoreductase;Redox-activecenter;Referenceproteome	54.72	39	68.6	28094000000	681	+	6.5705	0.869289	0	27.4305	27.3661	27.3728	27.4257	26.613	26.5109	26.4688	26.5252
O06446	O06446	secA1	Protein translocase subunit SecA 1	ATP-binding;Cellmembrane;Completeproteome;Cytoplasm;Membrane;Metal-binding;Nucleotide-binding;Proteintransport;Referenceproteome;Translocation;Transport;Zinc	95.959	107	78.2	93404000000	1875	+	6.97702	0.858643	0	28.1298	28.0506	28.0706	28.1345	27.2768	27.2154	27.2669	27.1918
O07325	O07325	ftsA	Cell division protein FtsA	Cellcycle;Celldivision;Cellshape;Completeproteome;Referenceproteome	52.934	36	56.8	33783000000	771	+	1.13247	-0.132111	0.0346314	27.4157	27.2964	27.2961	27.1576	27.4693	27.4209	27.4665	27.3376
O08387	O08387	secY	Protein translocase subunit SecY	Cellmembrane;Completeproteome;Membrane;Proteintransport;Referenceproteome;Translocation;Transmembrane;Transmembranehelix;Transport	47.147	9	15.6	990960000	101	+	1.65001	-0.348009	0.0109095	22.5374	22.6523	22.8041	22.9614	23.2555	23.0572	22.9309	23.1037
O33599	O33599	lytM	Glycyl-glycine endopeptidase LytM	3D-structure;Cellwallbiogenesis/degradation;Completeproteome;Directproteinsequencing;Hydrolase;Metal-binding;Metalloprotease;Protease;Referenceproteome;Secreted;Signal;Virulence;Zinc;Zymogen	34.316	2	13.6	151750000	18	+	1.5234	0.873105	0.0145597	20.7318	22.028	21.8016	21.4209	20.5843	20.6946	20.3148	20.8961
O34090	O34090	hemC	Porphobilinogen deaminase	Completeproteome;Porphyrinbiosynthesis;Referenceproteome;Transferase	34.354	30	61	8877100000	407	+	1.28702	0.144914	0.0239514	24.8906	24.8029	24.7459	24.9972	24.7281	24.7514	24.644	24.7335
O50581	O50581	recG	ATP-dependent DNA helicase RecG	ATP-binding;Completeproteome;DNA-binding;DNAdamage;DNArecombination;DNArepair;Helicase;Hydrolase;Nucleotide-binding;Referenceproteome	78.342	11	25.8	1448600000	156		0.195246	0.0555887	0.44832	22.7455	22.9841	23.0815	23.1042	23.0669	22.856	23.0303	22.7397
O52582	O52582	cdr	Coenzyme A disulfide reductase	3D-structure;Completeproteome;Directproteinsequencing;FAD;Flavoprotein;NADP;Oxidoreductase;Redox-activecenter;Referenceproteome	49.24	32	66	29313000000	812		0.925399	-0.0636358	0.059188	27.225	27.3173	27.1932	27.2998	27.3029	27.3004	27.3779	27.3086
P02976	P02976	spa	Immunoglobulin G-binding protein A	3D-structure;Cellwall;Completeproteome;IgG-bindingprotein;Peptidoglycan-anchor;Referenceproteome;Repeat;Secreted;Signal	56.436	11	35.1	960190000	52	+	4.16903	5.7121	0.000506122	27.136	26.0517	25.0254	25.5632	19.0977	20.6076	20.6237	20.599
P0A011	P0A011	lacD	Tagatose 1.6-diphosphate aldolase	Completeproteome;Lactosemetabolism;Lyase;Referenceproteome	36.595	15	71.8	2838700000	140	+	2.30853	0.250523	0.00267847	24.8365	24.9867	24.8783	24.8885	24.6438	24.6358	24.7719	24.5363
P0A086	P0A086	msrA2	Peptide methionine sulfoxide reductase MsrA 2	Completeproteome;Oxidoreductase;Referenceproteome	20.588	7	33.3	3014300000	119	+	2.9428	-0.70294	0.000696	24.1297	24.6325	24.4009	24.3961	25.0722	25.0094	25.0103	25.2792
P0A088	P0A088	msrB	Peptide methionine sulfoxide reductase MsrB	Completeproteome;Oxidoreductase;Referenceproteome	16.277	9	54.9	6978000000	150	+	3.33943	-0.683984	0.000585608	25.7387	25.7494	26.0078	25.6144	26.545	26.5564	26.3271	26.4177
P0A0B7	P0A0B7	ahpC	Alkyl hydroperoxide reductase subunit C	Antioxidant;Completeproteome;Directproteinsequencing;Disulfidebond;Oxidoreductase;Peroxidase;Redox-activecenter;Referenceproteome	20.976	25	82	140920000000	778	+	4.77973	0.94538	0	30.3058	30.1223	30.1583	30.1235	29.3919	29.2621	29.1705	29.1039
P0A0B9	P0A0B9	lacC	Tagatose-6-phosphate kinase	3D-structure;ATP-binding;Completeproteome;Kinase;Lactosemetabolism;Nucleotide-binding;Referenceproteome;Transferase	33.853	3	16.1	360280000	25		0.0153157	-0.0112877	0.931007	22.107	22.0018	22.2311	22.274	22.1489	22.3127	21.5204	22.677
P0A0F4	P0A0F4	rplK	50S ribosomal protein L11	Completeproteome;Methylation;Referenceproteome;Ribonucleoprotein;Ribosomalprotein;RNA-binding;rRNA-binding	14.874	25	75	236840000000	812		0.399226	-0.0574818	0.236323	29.3715	29.4112	29.607	29.421	29.439	29.4653	29.5444	29.592
P0A0F8	P0A0F8	rplO	50S ribosomal protein L15	Completeproteome;Referenceproteome;Ribonucleoprotein;Ribosomalprotein;RNA-binding;rRNA-binding	15.597	24	96.6	180050000000	650	+	3.29405	-0.318131	0.000561905	30.5036	30.4751	30.4983	30.5237	30.8786	30.8268	30.8819	30.6858
P0A0G2	P0A0G2	rpmD	50S ribosomal protein L30	Completeproteome;Referenceproteome;Ribonucleoprotein;Ribosomalprotein	6.5536	18	100	127160000000	578	+	2.28941	-0.230226	0.00265886	29.0359	28.9489	29.063	28.8463	29.2241	29.2484	29.1968	29.1456
P0A0H0	P0A0H0	rpsL	30S ribosomal protein S12	Completeproteome;Methylation;Referenceproteome;Ribonucleoprotein;Ribosomalprotein;RNA-binding;rRNA-binding;tRNA-binding	15.287	26	89.8	189040000000	635		0.831456	-0.132669	0.0741614	29.9728	29.9275	30.0837	29.9157	30.1793	29.9242	30.0804	30.2465
P0A0I4	P0A0I4	secE	Protein translocase subunit SecE	Cellmembrane;Completeproteome;Membrane;Proteintransport;Referenceproteome;Translocation;Transmembrane;Transmembranehelix;Transport	6.9322	2	18.3	444240000	19		0.17619	-0.141181	0.477773	23.3691	22.7121	22.9929	22.4808	23.137	23.679	22.5883	22.7153
P0A0J0	P0A0J0	sigA	RNA polymerase sigma factor SigA	3D-structure;Completeproteome;Cytoplasm;DNA-binding;Referenceproteome;Sigmafactor;Transcription;Transcriptionregulation	42.17	38	68.8	16373000000	565	+	4.53414	0.777198	0	26.6499	26.7533	26.754	26.9138	25.9909	26.1065	25.9581	25.9068
P0A0J3	P0A0J3	sodA	Superoxide dismutase [Mn] 1	Completeproteome;Manganese;Metal-binding;Oxidoreductase;Referenceproteome;Stressresponse	22.711	12	93.5	43281000000	297	+	1.26504	0.377666	0.0251303	28.9888	29.3391	28.8659	28.6376	28.7482	28.5702	28.466	28.5363
P0A0K3	P0A0K3	SAOUHSC_02013	Uncharacterized protein SAOUHSC_02013	Completeproteome;Referenceproteome	18.632	6	52.6	2335200000	95	+	4.53873	-1.464	0	22.3763	22.5039	22.2274	22.1048	23.8777	23.9745	23.6597	23.5565
P0A0M9	P0A0M9	SAOUHSC_00995	UPF0039 protein SAOUHSC_00995	Completeproteome;Referenceproteome	16.556	9	66.7	1987400000	127	+	2.98882	-0.698797	0.000714579	22.4836	22.3879	22.2587	21.9845	22.8467	22.9962	23.0657	23.0013
P0A0Q0	P0A0Q0	lacR	Lactose phosphotransferase system repressor	Completeproteome;DNA-binding;Lactosemetabolism;Referenceproteome;Repressor;Transcription;Transcriptionregulation	28.548	9	46.2	973670000	101	+	1.07708	-0.82368	0.0405879	21.3022	22.7704	23.0346	22.7803	23.3008	23.1807	23.4187	23.2821
P0A0Q4	P0A0Q4	SAOUHSC_00996	Uncharacterized protein SAOUHSC_00996	Completeproteome;Referenceproteome	18.268	4	50.6	591600000	34		0.368574	-0.20329	0.257618	23.261	23.6017	22.5409	23.0212	23.2023	23.5526	23.1695	23.3135
P0C0V7	P0C0V7	glmM	Phosphoglucosamine mutase	Completeproteome;Isomerase;Magnesium;Metal-binding;Phosphoprotein;Referenceproteome	49.265	39	67.4	80332000000	741	+	2.39546	0.251613	0.00250231	29.4022	29.4465	29.2532	29.4199	29.0812	29.1934	29.0569	29.1839
P0C7Y1	P0C7Y1	psmA1	Phenol-soluble modulin alpha 1 peptide	Completeproteome;Cytolysis;Referenceproteome;Virulence	2.2598	2	85.7	153410000	20		0.0247557	0.0125747	0.891238	21.3458	21.5559	22.0927	21.8907	21.7601	21.5787	21.7047	21.7913
P47768	P47768	rpoB	DNA-directed RNA polymerase subunit beta	Completeproteome;DNA-directedRNApolymerase;Nucleotidyltransferase;Referenceproteome;Transcription;Transferase	133.22	144	91.4	287230000000	3193	+	2.98113	0.162562	0.000710204	29.1729	29.1787	29.2049	29.1406	28.9514	29.022	29.0051	29.0683
P48860	P48860	rplL	50S ribosomal protein L7/L12	Completeproteome;Referenceproteome;Ribonucleoprotein;Ribosomalprotein	12.711	24	100	245530000000	817	+	2.01945	-0.54702	0.00488477	30.8699	30.6176	30.6563	30.2534	31.3377	31.163	31.0202	31.0643
P48940	P48940	rpsG	30S ribosomal protein S7	Completeproteome;Referenceproteome;Ribonucleoprotein;Ribosomalprotein;RNA-binding;rRNA-binding;tRNA-binding	17.794	36	97.4	293460000000	1132	+	1.71113	-0.355634	0.0096284	30.4541	30.9202	30.8845	30.8115	31.0233	31.1333	31.157	31.1791
P52078	P52078	SAOUHSC_00997	Uncharacterized protein SAOUHSC_00997	Completeproteome;Referenceproteome;Signal	45.685	29	63.5	5683900000	413	+	2.81768	-0.3374	0.00107317	23.698	23.9607	23.8764	23.8992	24.2595	24.189	24.1936	24.1416
P60070	P60070	rsbV	Anti-sigma-B factor antagonist	Completeproteome;Phosphoprotein;Referenceproteome	12.205	7	76.9	8456800000	161	+	2.46787	-0.388449	0.00202226	25.5743	25.647	25.7319	25.3736	25.9593	26.0209	26.0178	25.8828
P60393	P60393	rsmH	Ribosomal RNA small subunit methyltransferase H	Completeproteome;Cytoplasm;Methyltransferase;Referenceproteome;rRNAprocessing;S-adenosyl-L-methionine;Transferase	35.681	21	63	10058000000	304	+	1.2168	-0.261413	0.0284466	26.7032	26.6534	27.0233	26.9371	27.0079	26.96	27.1212	27.2735
P60430	P60430	rplB	50S ribosomal protein L2	Completeproteome;Referenceproteome;Ribonucleoprotein;Ribosomalprotein;RNA-binding;rRNA-binding	30.155	48	90.3	389270000000	1259	+	1.99839	-0.33742	0.00539314	30.3829	30.6217	30.802	30.613	30.8781	30.924	31.0237	30.9434
P60611	P60611	lytR	Sensory transduction protein LytR	Completeproteome;Cytoplasm;DNA-binding;Phosphoprotein;Referenceproteome;Transcription;Transcriptionregulation;Two-componentregulatorysystem	28.221	10	51.6	1137800000	101	+	2.25548	-0.4285	0.00285549	22.5676	22.3701	22.3916	22.2483	23.0441	22.8059	22.7489	22.6925
P60643	P60643	lrgB	Antiholin-like protein LrgB	Cellmembrane;Completeproteome;Cytolysis;Membrane;Referenceproteome;Transmembrane;Transmembranehelix	25.097	2	11.6	442630000	30	+	4.89528	-1.66001	0	21.7109	22.1207	22.1983	21.9109	23.5814	23.7403	23.4929	23.7662
P68805	P68805	mscL	Large-conductance mechanosensitive channel	Cellmembrane;Completeproteome;Ionchannel;Iontransport;Membrane;Referenceproteome;Transmembrane;Transmembranehelix;Transport	13.616	1	20.8	113150000	8	+	1.80334	1.58396	0.00790698	23.1795	21.8552	22.9436	22.2665	20.076	20.8782	21.1084	21.8464
P69848	P69848	moaA	Cyclic pyranopterin monophosphate synthase	3D-structure;4Fe-4S;Completeproteome;GTP-binding;Iron;Iron-sulfur;Lyase;Metal-binding;Molybdenumcofactorbiosynthesis;Nucleotide-binding;Referenceproteome;S-adenosyl-L-methionine	39.077	18	52.6	1429500000	90		0.145495	0.0423965	0.536476	23.1622	22.9241	22.8601	23.1966	23.091	22.8542	23.1417	22.8865
P72358	P72358	lrgA	Antiholin-like protein LrgA	Cellmembrane;Completeproteome;Cytolysis;Membrane;Referenceproteome;Transmembrane;Transmembranehelix	15.78	2	7.5	789060000	40	+	5.24835	-1.43935	0	22.1181	22.4015	22.2103	22.0551	23.7937	23.6043	23.5054	23.6389
P72360	P72360	scdA	Iron-sulfur cluster repair protein ScdA	Completeproteome;Cytoplasm;Iron;Metal-binding;Referenceproteome;Stressresponse	25.485	16	78.1	16925000000	323	+	3.27319	0.725012	0.000555294	26.71	27.1688	26.8086	26.8847	26.1827	26.2427	26.0408	26.206
P95689	P95689	serS	Serine--tRNA ligase	Aminoacyl-tRNAsynthetase;ATP-binding;Completeproteome;Cytoplasm;Ligase;Nucleotide-binding;Proteinbiosynthesis;Referenceproteome	48.639	45	87.6	59657000000	856	+	3.33979	-0.223737	0.000587065	28.0413	27.985	28.0194	28.1168	28.2451	28.2381	28.2629	28.3113
Q05615	Q05615	aroA	3-phosphoshikimate 1-carboxyvinyltransferase	Amino-acidbiosynthesis;Aromaticaminoacidbiosynthesis;Completeproteome;Cytoplasm;Referenceproteome;Transferase	47.003	18	60.2	3339100000	197	+	2.66589	-0.613358	0.00139551	23.3996	23.6344	23.2886	23.4603	24.3252	24.052	23.882	23.9771
Q2FUQ1	Q2FUQ1	rnpA	Ribonuclease P protein component	Completeproteome;Endonuclease;Hydrolase;Nuclease;Referenceproteome;RNA-binding;tRNAprocessing	13.652	13	69.2	1121500000	110	+	5.32438	1.27838	0	23.6873	23.579	23.6897	23.6277	22.243	22.2459	22.5732	22.408
Q2FUQ2	Q2FUQ2	mnmE	tRNA modification GTPase MnmE	Completeproteome;Cytoplasm;GTP-binding;Hydrolase;Magnesium;Metal-binding;Nucleotide-binding;Potassium;Referenceproteome;tRNAprocessing	51.341	28	48.1	7899300000	395	+	5.94678	0.953331	0	25.3995	25.513	25.5807	25.5652	24.6162	24.5718	24.566	24.491
Q2FUQ3	Q2FUQ3	mnmG	tRNA uridine 5-carboxymethylaminomethyl modification enzyme MnmG	Completeproteome;Cytoplasm;FAD;Flavoprotein;NAD;Referenceproteome;tRNAprocessing	70.115	62	81.8	33102000000	1169	+	5.58028	0.778746	0	26.6409	26.7384	26.8246	26.8025	25.9197	25.9945	25.9666	26.0106
Q2FUQ4	Q2FUQ4	rsmG	Ribosomal RNA small subunit methyltransferase G	Completeproteome;Cytoplasm;Methyltransferase;Referenceproteome;rRNAprocessing;S-adenosyl-L-methionine;Transferase	27.359	13	58.6	1681100000	147	+	2.67905	0.709918	0.00131707	23.5355	23.9677	23.7414	24.025	22.9287	23.2478	23.0176	23.2358
Q2FUQ5	Q2FUQ5	SAOUHSC_03049		Completeproteome;Referenceproteome	32.196	17	64.5	5080400000	204	+	2.79476	0.425897	0.00113966	25.252	25.2934	25.3717	25.2446	24.6513	24.9178	24.9785	24.9105
Q2FUQ8	Q2FUQ8	SAOUHSC_03046		Completeproteome;Referenceproteome	21.756	3	18.5	105200000	13	+	2.6793	-1.25319	0.00131937	18.9374	18.7187	19.1797	19.7948	20.3625	20.4036	20.6058	20.2713
Q2FUQ9	Q2FUQ9	SAOUHSC_03045		Activator;Completeproteome;Cytoplasm;DNA-binding;Referenceproteome;Transcription;Transcriptionregulation	8.4222	6	96	1443300000	73		0.356583	-0.29291	0.267338	24.5412	24.7254	24.6208	23.7944	25.5084	24.562	24.6197	24.1633
Q2FUR8	Q2FUR8	SAOUHSC_03034		Acyltransferase;Completeproteome;Referenceproteome;Transferase	30.438	5	35.6	1343300000	56		0.196234	0.109481	0.447209	24.5135	24.5436	24.2633	24.2609	23.8341	24.3271	24.1598	24.8223
Q2FUS2	Q2FUS2	SAOUHSC_03030		Completeproteome;Referenceproteome	51.341	4	8.1	925750000	65	+	2.26147	-0.628706	0.00286377	23.2935	23.4767	23.6934	23.9669	24.3189	24.247	24.2124	24.167
Q2FUS3	Q2FUS3	SAOUHSC_03028		Completeproteome;Referenceproteome	17.511	3	26.6	340780000	10		0.260816	-0.431094	0.362247	19.8037	22.499	20.4561	22.0968	22.1371	21.8477	21.3315	21.2637
Q2FUS4	Q2FUS4	SAOUHSC_03027		Completeproteome;Referenceproteome	12.556	5	46.4	527860000	24	+	1.19438	-0.541337	0.0301266	22.2156	22.5032	22.5965	23.1483	23.5007	22.8266	23.1568	23.1448
Q2FUS6	Q2FUS6	pcp	Pyrrolidone-carboxylate peptidase	Completeproteome;Cytoplasm;Hydrolase;Protease;Referenceproteome;Thiolprotease	23.167	4	39.2	1223800000	6		0.706107	0.484469	0.100849	24.2145	25.1982	24.2389	25.1717	23.8567	23.9738	24.3938	24.661
Q2FUS7	Q2FUS7	SAOUHSC_03024	UPF0176 protein SAOUHSC_03024	Completeproteome;Referenceproteome	37.057	6	25.5	210250000	45	+	4.05255	-1.0168	0.000462687	20.654	20.7513	20.7619	20.5186	21.543	21.9574	21.5781	21.6745
Q2FUS8	Q2FUS8	drp35	Lactonase drp35	Calcium;Completeproteome;Cytoplasm;Hydrolase;Metal-binding;Referenceproteome	35.963	13	54.3	2233000000	97	+	2.10683	-0.940328	0.00430345	24.6845	24.3299	24.8298	23.9555	25.096	25.2121	25.5871	25.6659
Q2FUS9	Q2FUS9	SAOUHSC_03022	UPF0312 protein SAOUHSC_03022	Completeproteome;Referenceproteome	18.655	11	70.8	1917700000	150	+	2.87616	-0.908951	0.000789168	23.0649	22.6934	22.6528	22.7257	24.0572	23.7017	23.4764	23.5373
Q2FUT9	Q2FUT9	SAOUHSC_03012		Aminotransferase;Completeproteome;Pyridoxalphosphate;Referenceproteome;Transferase	38.24	3	12.2	87175000	3		0.00540298	-0.00441647	0.975589	20.6729	20.9796	20.725	20.9227	20.8789	20.7781	20.188	21.4728
Q2FUU5	Q2FUU5	lipA	Lipase 1	Completeproteome;Hydrolase;Lipiddegradation;Lipidmetabolism;Referenceproteome;Secreted;Signal;Zymogen	76.675	21	42.1	925640000	98	+	1.95524	-1.64221	0.00586563	23.392	21.7162	21.3957	21.7768	23.8385	23.8125	23.6399	23.5588
Q2FUV6	Q2FUV6	SAOUHSC_02995		Completeproteome;Referenceproteome	22.315	3	32.5	295530000	6		0.102893	-0.310448	0.632706	24.6901	19.4938	23.2988	23.047	23.1753	22.9152	22.8421	22.8389
Q2FUW0	Q2FUW0	SAOUHSC_02991		Completeproteome;Referenceproteome	25.85	5	38.7	81347000	8	+	3.69414	-2.14071	0.000375758	19.7158	20.0556	20.3276	19.8616	22.2246	21.4965	22.6134	22.189
Q2FUW1	Q2FUW1	sraP	Serine-rich adhesin for platelets	3D-structure;Cellwall;Completeproteome;Peptidoglycan-anchor;Referenceproteome;Secreted;Virulence	228.04	7	5.8	338210000	60	+	1.67447	-0.517473	0.010173	21.8586	21.6836	22.0249	22.1612	22.1277	22.3436	22.6538	22.6731
Q2FUW7	Q2FUW7	gtf1	Glycosyltransferase Gtf1	Cellmembrane;Completeproteome;Cytoplasm;Glycosyltransferase;Membrane;Referenceproteome;Transferase	58.272	3	8.2	176290000	34		0.776783	-0.513807	0.0846085	20.1372	20.0124	21.1391	21.1287	21.2649	21.3335	21.0378	20.8365
Q2FUW8	Q2FUW8	gtf2	Glycosyltransferase stabilizing protein Gtf2	Cellmembrane;Completeproteome;Membrane;Referenceproteome	53.028	8	23.2	407910000	48	+	2.23876	-0.610096	0.00310791	21.9623	21.2753	21.6782	21.6604	22.1671	22.2235	22.2952	22.3308
Q2FUW9	Q2FUW9	SAOUHSC_02982		Completeproteome;Referenceproteome	70.931	7	14.5	371680000	13		0.00917495	-0.00804663	0.958655	21.8959	21.1793	21.7863	21.5183	21.4458	22.1724	21.7854	21.0085
Q2FUX0	Q2FUX0	SAOUHSC_02975		Cellmembrane;Completeproteome;Membrane;Phosphotransferasesystem;Referenceproteome;Sugartransport;Transferase;Transmembrane;Transmembranehelix;Transport	69.882	11	20.3	1490200000	128		0.183197	-0.0778036	0.46682	23.6634	23.7536	23.8861	23.5051	24.19	23.5095	23.7472	23.6726
Q2FUX3	Q2FUX3	isaB	Immunodominant staphylococcal antigen B	Completeproteome;Referenceproteome;Secreted;Signal	19.37	14	71.4	2448100000	191	+	4.4813	1.07544	0	24.2859	24.6724	24.5881	24.6872	23.5323	23.4868	23.4042	23.5086
Q2FUX7	Q2FUX7	arcA	Arginine deiminase	Argininemetabolism;Completeproteome;Cytoplasm;Hydrolase;Referenceproteome	46.914	42	67.2	37356000000	732	+	4.03895	1.30582	0.000455882	27.1198	27.4642	27.3362	27.4283	26.3225	25.9167	26.1089	25.7771
Q2FUX8	Q2FUX8	argF	Ornithine carbamoyltransferase	Amino-acidbiosynthesis;Argininebiosynthesis;Completeproteome;Cytoplasm;Referenceproteome;Transferase	37.762	38	78	62980000000	787	+	3.76755	1.43125	0.0003875	28.2662	28.5054	28.3509	28.4924	27.4052	26.8181	27.0216	26.645
Q2FUY1	Q2FUY1	arcR	HTH-type transcriptional regulator ArcR	Activator;cAMP;cAMP-binding;Completeproteome;Cytoplasm;DNA-binding;Nucleotide-binding;Referenceproteome;Transcription;Transcriptionregulation	27.428	4	19.7	304960000	9	+	3.30968	1.51739	0.000570048	23.2723	23.9226	23.316	22.9397	21.9948	21.9332	21.8571	21.596
Q2FUY2	Q2FUY2	clfB	Clumping factor B	Cellwall;Completeproteome;Peptidoglycan-anchor;Referenceproteome;Secreted;Signal;Virulence	93.593	16	29.5	1154600000	135	+	4.13858	1.55276	0.0005	24.0086	23.6751	23.4273	23.4	22.2844	21.9305	22.1024	21.9827
Q2FUY3	Q2FUY3	SAOUHSC_02962		Completeproteome;Referenceproteome	29.096	10	60.5	1624900000	128	+	1.90726	0.52413	0.00627778	24.3984	24.5532	24.7941	24.7817	24.2293	23.8109	24.3313	24.0594
Q2FUY9	Q2FUY9	SAOUHSC_02956		Completeproteome;DNA-binding;Phosphoprotein;Referenceproteome;Transcription;Transcriptionregulation;Two-componentregulatorysystem	25.392	4	12.7	240310000	26		0.689418	1.00835	0.105015	21.9141	22.0187	21.9639	22.6381	20.0424	19.831	22.2778	22.3501
Q2FUZ1	Q2FUZ1	SAOUHSC_02954		ATP-binding;Completeproteome;Nucleotide-binding;Referenceproteome	27.73	6	38.2	8032000000	42		0.11476	0.0250745	0.602277	27.4823	27.7871	27.6805	27.6077	27.6338	27.7244	27.4825	27.6166
Q2FUZ2	Q2FUZ2	SAOUHSC_02953		Completeproteome;Referenceproteome	76.732	3	8	38152000	11		0.0559897	-0.0728564	0.769781	21.0901	20.0127	19.4222	20.0854	20.0372	21.1218	19.8678	19.875
Q2FUZ8	Q2FUZ8	SAOUHSC_02947	Sulfite reductase [NADPH] flavoprotein alpha-component	Amino-acidbiosynthesis;Completeproteome;Cysteinebiosynthesis;Electrontransport;FAD;Flavoprotein;FMN;NADP;Oxidoreductase;Referenceproteome;Transport	72.212	14	28.1	3997200000	178		0.730653	-0.115938	0.0944812	26.1066	26.1637	26.1215	26.3383	26.2856	26.2143	26.4615	26.2324
Q2FUZ9	Q2FUZ9	SAOUHSC_02945		Completeproteome;Referenceproteome	22.542	4	44.8	433310000	9		0.385905	-0.15661	0.245349	23.1947	23.8341	23.7433	23.4364	23.8143	23.5058	23.5797	23.9353
Q2FV02	Q2FV02	SAOUHSC_02942		Completeproteome;Oxidoreductase;Referenceproteome	70.479	34	40.4	6352300000	373	+	4.35015	1.25608	0.000320755	25.0561	25.2641	25.549	25.2588	24.1874	23.9242	23.9203	24.0719
Q2FV03	Q2FV03	SAOUHSC_02941	Anaerobic ribonucleoside-triphosphate reductase-activating protein	Completeproteome;Oxidoreductase;Referenceproteome	20.293	3	15.2	186840000	19	+	3.33595	2.52328	0.000579853	22.3897	22.2997	23.1707	22.3354	19.3679	19.6982	20.698	20.3382
Q2FV06	Q2FV06	SAOUHSC_02937		Cellmembrane;Completeproteome;Membrane;Referenceproteome;Transmembrane;Transmembranehelix;Transport	59.51	2	3	526070000	30	+	1.18859	-0.457705	0.0303883	23.2928	23.1957	23.5751	23.546	23.7209	23.4822	23.9039	24.3334
Q2FV07	Q2FV07	SAOUHSC_02936		Completeproteome;Referenceproteome	26.238	5	44.3	308390000	56	+	1.92656	-1.34101	0.00618321	21.6301	20.9769	21.261	19.9003	22.3683	22.376	22.2364	22.1517
Q2FV08	Q2FV08	SAOUHSC_02935		Completeproteome;Referenceproteome	21.742	14	82.4	6028000000	169		0.588323	-0.109596	0.138172	25.4308	25.6323	25.4019	25.4802	25.6914	25.7405	25.4449	25.5067
Q2FV10	Q2FV10	SAOUHSC_02933	Betaine-aldehyde dehydrogenase	Completeproteome;NAD;Oxidoreductase;Referenceproteome	54.622	32	58.3	29748000000	691	+	1.60218	-0.213106	0.0118331	27.2493	27.1796	27.1608	27.4233	27.3775	27.4839	27.5659	27.4382
Q2FV11	Q2FV11	betA	Oxygen-dependent choline dehydrogenase	Completeproteome;FAD;Flavoprotein;NAD;Oxidoreductase;Referenceproteome	63.609	49	80.5	36804000000	917		0.384795	-0.0988493	0.245883	26.5699	26.4242	26.5628	26.7849	26.4697	26.6366	26.7852	26.8458
Q2FV14	Q2FV14	SAOUHSC_02929		Completeproteome;Referenceproteome	59.748	28	60.5	5633400000	301	+	4.08604	-0.416845	0.000478764	24.4507	24.5158	24.4017	24.5228	24.9492	24.9404	24.8614	24.8074
Q2FV16	Q2FV16	mqo	Probable malate:quinone oxidoreductase	Completeproteome;FAD;Flavoprotein;Oxidoreductase;Referenceproteome;Tricarboxylicacidcycle	55.998	77	85.1	302720000000	2004		0.763747	-0.0824347	0.0878246	29.7874	29.8701	29.89	29.9084	29.8422	29.8962	30.0164	30.0309
Q2FV17	Q2FV17	fda	Fructose-bisphosphate aldolase class 1	Completeproteome;Glycolysis;Lyase;Referenceproteome;Schiffbase	33.054	53	100	350300000000	1601	+	5.63769	0.848997	0	31.0634	31.0362	30.9403	30.8915	30.1867	30.1663	30.0632	30.1192
Q2FV19	Q2FV19	SAOUHSC_02921		Completeproteome;Lyase;Referenceproteome	26.406	6	32.9	1109500000	32		0.0381011	0.0268817	0.837348	24.2161	23.2205	23.4363	23.6885	23.8456	23.7853	23.4225	23.4005
Q2FV20	Q2FV20	SAOUHSC_02920	2-dehydropantoate 2-reductase	Completeproteome;NADP;Oxidoreductase;Pantothenatebiosynthesis;Referenceproteome	32.357	5	27.3	760180000	46		0.132927	0.18091	0.561541	21.7943	23.3934	23.5932	23.379	22.0785	22.7344	23.2023	23.4211
Q2FV21	Q2FV21	panB	3-methyl-2-oxobutanoate hydroxymethyltransferase	Completeproteome;Cytoplasm;Magnesium;Metal-binding;Pantothenatebiosynthesis;Referenceproteome;Transferase	29.255	31	84.6	9922400000	541		0.201462	0.0346122	0.440056	25.4531	25.7116	25.6072	25.6311	25.5429	25.6336	25.6286	25.4594
Q2FV22	Q2FV22	panC	Pantothenate synthetase	3D-structure;ATP-binding;Completeproteome;Cytoplasm;Ligase;Nucleotide-binding;Pantothenatebiosynthesis;Referenceproteome	31.534	14	63.3	3459300000	165		0.0757793	-0.0324168	0.706313	24.0859	24.2548	24.0911	24.1009	23.858	23.9731	24.4738	24.3574
Q2FV23	Q2FV23	panD	Aspartate 1-decarboxylase;Aspartate 1-decarboxylase alpha chain;Aspartate 1-decarboxylase beta chain	Autocatalyticcleavage;Completeproteome;Cytoplasm;Decarboxylase;Lyase;Pantothenatebiosynthesis;Pyruvate;Referenceproteome;Schiffbase;Zymogen	14.05	4	59.1	3488200000	53		0.387339	0.218051	0.244402	27.0174	26.8482	26.7369	26.0309	26.1302	26.6943	26.4804	26.4562
Q2FV24	Q2FV24	SAOUHSC_02915		Completeproteome;Hydrolase;Referenceproteome	64.289	4	16.1	138920000	11		0.074905	0.0331683	0.708764	21.3492	21.248	21.6842	21.3775	21.159	21.3899	21.2393	21.7381
Q2FV27	Q2FV27	SAOUHSC_02912		Completeproteome;Referenceproteome	16.939	11	58.4	8715100000	132		0.925129	0.60247	0.0592381	26.5223	26.4007	26.5695	25.5226	25.0261	25.7421	26.0713	25.7657
Q2FV28	Q2FV28	SAOUHSC_02911		Completeproteome;Referenceproteome	27.789	19	59.2	2692900000	204	+	2.76968	0.643561	0.00112915	24.0129	24.4137	24.4307	24.3281	23.5006	23.5683	23.7844	23.758
Q2FV29	Q2FV29	SAOUHSC_02910		Completeproteome;Referenceproteome	10.712	3	49.5	226090000	13		0.883425	0.514048	0.0655979	22.8513	22.2516	22.4515	22.05	22.3691	22.127	21.7854	21.2666
Q2FV30	Q2FV30	SAOUHSC_02909	Dihydroorotate dehydrogenase (quinone)	Completeproteome;Flavoprotein;FMN;Membrane;Oxidoreductase;Pyrimidinebiosynthesis;Referenceproteome	39.536	24	61	9285000000	334	+	2.07266	0.408541	0.00435772	25.0804	25.446	25.378	25.5248	24.9544	24.9366	25.0566	24.8474
Q2FV31	Q2FV31	SAOUHSC_02908		Completeproteome;Referenceproteome	32.988	6	34	224280000	28		0.292027	-0.449614	0.328736	19.2189	19.8789	19.4569	21.1462	19.4174	19.6969	21.3228	21.0623
Q2FV32	Q2FV32	SAOUHSC_02907		Completeproteome;Referenceproteome	9.7986	2	29.3	278500000	16		0.74992	-0.586488	0.0901053	23.355	22.6579	23.1731	22.5341	24.4094	23.2422	23.5523	22.8622
Q2FV33	Q2FV33	SAOUHSC_02906		Completeproteome;Referenceproteome	14.822	4	50	415970000	34	+	2.46384	-0.462088	0.00201905	22.6343	22.8377	22.9087	22.8198	23.4162	23.3027	23.0381	23.2919
Q2FV34	Q2FV34	SAOUHSC_02905		Completeproteome;Referenceproteome	11.578	6	57.1	1387700000	109	+	4.62475	-1.23533	0	23.3853	23.5104	23.5031	23.8245	24.8565	24.8735	24.6619	24.7729
Q2FV39	Q2FV39	SAOUHSC_02900	Uncharacterized hydrolase SAOUHSC_02900	Completeproteome;Hydrolase;Referenceproteome	31.006	18	69.9	11157000000	294	+	5.51746	-0.857764	0	24.3764	24.5132	24.5946	24.52	25.3063	25.3286	25.3924	25.4079
Q2FV40	Q2FV40	SAOUHSC_02899		Completeproteome;Referenceproteome	38.194	10	52.4	1039500000	79	+	1.48972	-0.916919	0.0154409	22.6704	23.0295	21.8593	21.793	23.4044	23.0334	23.5412	23.0408
Q2FV41	Q2FV41	SAOUHSC_02898		Completeproteome;Referenceproteome	24.931	4	32.9	319440000	32		0.0937235	0.0316696	0.655573	22.6571	22.4723	22.378	22.6482	22.609	22.3488	22.7467	22.3244
Q2FV44	Q2FV44	SAOUHSC_02895		Completeproteome;Referenceproteome	30.608	17	76.2	2424800000	234	+	5.60843	-0.788577	0	23.47	23.6153	23.5884	23.6058	24.2674	24.3863	24.3748	24.4052
Q2FV52	Q2FV52	isaA	Probable transglycosylase IsaA	Completeproteome;Directproteinsequencing;Glycosidase;Hydrolase;Referenceproteome;Secreted;Signal	24.203	7	36.9	73763000000	350	+	3.32049	0.556891	0.000574209	28.6574	28.5866	28.6116	28.8153	27.9882	28.1499	28.0349	28.2705
Q2FV53	Q2FV53	SAOUHSC_02886		Completeproteome;Referenceproteome	19.141	3	16.7	349010000	36		0.528002	0.375309	0.161973	22.4662	23.3176	23.4468	23.5512	23.1335	22.8	22.2179	23.1292
Q2FV54	Q2FV54	oatA	O-acetyltransferase OatA	Acyltransferase;Cellmembrane;Completeproteome;Membrane;Referenceproteome;Transferase;Transmembrane;Transmembranehelix	69.098	18	27.7	4030800000	260	+	1.17926	-0.30614	0.0310222	23.7175	24.1406	23.9006	24.2033	24.195	24.4122	24.4471	24.1322
Q2FV55	Q2FV55	ssaA	Staphylococcal secretory antigen SsaA	Completeproteome;Referenceproteome;Repeat;Secreted;Signal;Virulence	27.589	6	44.7	1674000000	99	+	4.70251	-0.902472	0	22.5302	22.8071	22.5224	22.6079	23.4692	23.5088	23.4785	23.621
Q2FV57	Q2FV57	crtP	Diapolycopene oxygenase	Carotenoidbiosynthesis;Completeproteome;FAD;Flavoprotein;Oxidoreductase;Referenceproteome	57.186	7	22.1	86590000	16		0.200465	-0.179489	0.441504	20.1425	20.2566	20.3098	19.7617	19.9847	21.176	19.6329	20.3951
Q2FV59	Q2FV59	crtM	Dehydrosqualene synthase	Carotenoidbiosynthesis;Completeproteome;Referenceproteome;Transferase	34.23	3	16	36035000	10		0.123273	-0.181687	0.58328	20.1388	19.2261	18.6289	21.0593	20.2654	20.1114	19.7185	19.6844
Q2FV60	Q2FV60	crtN	Dehydrosqualene desaturase	Carotenoidbiosynthesis;Completeproteome;FAD;Flavoprotein;Oxidoreductase;Referenceproteome	56.741	17	45.8	1823300000	92	+	2.10767	-1.97714	0.00430939	21.2345	23.0344	21.7347	20.7311	23.6105	23.4593	23.6417	23.9317
Q2FV61	Q2FV61	SAOUHSC_02876		3D-structure;Aminotransferase;Completeproteome;Referenceproteome;Transferase	42.734	5	27.9	131410000	21	+	3.68795	-0.57499	0.000373494	20.6791	20.6075	20.5102	20.4939	21.1963	21.1037	21.0126	21.278
Q2FV62	Q2FV62	SAOUHSC_02875		Completeproteome;Oxidoreductase;Referenceproteome	37.223	13	40.4	983160000	59	+	2.75927	-0.68783	0.00129197	23.0979	23.48	23.3305	23.2334	24.1592	24.0314	24.0137	23.6889
Q2FV63	Q2FV63	copZ	Copper chaperone CopZ	Chaperone;Completeproteome;Copper;Cytoplasm;Metal-binding;Referenceproteome	7.2369	1	26.5	147200000	18		0.883095	-0.679768	0.0655433	22.3805	21.5017	21.9305	20.9298	22.8008	22.3115	22.6217	21.7275
Q2FV64	Q2FV64	copA	Copper-exporting P-type ATPase A	ATP-binding;Cellmembrane;Completeproteome;Copper;Coppertransport;Hydrolase;Iontransport;Magnesium;Membrane;Metal-binding;Nucleotide-binding;Phosphoprotein;Referenceproteome;Repeat;Transmembrane;Transmembranehelix;Transport	86.743	12	22.3	433610000	89		0.402116	-0.139453	0.234046	21.5027	21.8893	21.303	21.8431	21.8043	21.9045	21.7743	21.6129
Q2FV66	Q2FV66	SAOUHSC_02871		Completeproteome;Referenceproteome	22.119	6	34.2	1650100000	81	+	6.18849	-2.32767	0	22.2991	22.2635	22.0079	22.2488	24.5206	24.3072	24.7129	24.5893
Q2FV67	Q2FV67	rocA	1-pyrroline-5-carboxylate dehydrogenase	Completeproteome;NAD;Oxidoreductase;Referenceproteome	56.867	52	89.1	86337000000	1078	+	5.24119	-1.19951	0	27.8944	27.987	27.8589	28.0811	29.0344	29.0815	29.3196	29.184
Q2FV70	Q2FV70	SAOUHSC_02866		Completeproteome;Referenceproteome	90.408	4	10	280270000	20		0.84002	-0.784458	0.0730435	21.2512	22.3467	20.763	21.9959	21.6756	23.0677	22.6213	22.1302
Q2FV74	Q2FV74	clpL	ATP-dependent Clp protease ATP-binding subunit ClpL	ATP-binding;Chaperone;Completeproteome;Nucleotide-binding;Referenceproteome;Virulence	77.835	64	86.2	25503000000	868	+	5.705	-1.41677	0	24.2902	24.5142	24.399	24.2426	25.9312	25.7384	25.7281	25.7154
Q2FV75	Q2FV75	SAOUHSC_02861		Completeproteome;Methyltransferase;Referenceproteome;Transferase	18.945	7	38.7	463640000	50		0.632946	0.134451	0.122254	22.2572	22.3076	22.3299	22.647	22.1656	22.1696	22.3082	22.3605
Q2FV76	Q2FV76	SAOUHSC_02860		Completeproteome;Referenceproteome	43.205	37	62.6	80219000000	841	+	1.05	-0.111034	0.0428971	27.4779	27.447	27.5957	27.6167	27.6451	27.6921	27.5466	27.6978
Q2FV77	Q2FV77	SAOUHSC_02859	3-hydroxy-3-methylglutaryl coenzyme A reductase	Completeproteome;NAD;Oxidoreductase;Referenceproteome	46.236	25	62.4	18221000000	389	+	6.55333	-1.28205	0	25.4335	25.54	25.3528	25.5367	26.6937	26.7216	26.7688	26.8072
Q2FV81	Q2FV81	SAOUHSC_02855		Completeproteome;Hydrolase;Referenceproteome	16.87	7	46.2	661630000	48		0.763787	-0.334379	0.0878974	21.4594	21.8667	21.9625	21.9584	21.8299	22.5799	21.8723	22.3023
Q2FV83	Q2FV83	SAOUHSC_02852		Completeproteome;DNA-binding;Referenceproteome;Transcription;Transcriptionregulation	31.466	7	32	869770000	68	+	1.03781	-0.504354	0.0444253	21.786	21.4562	22.1922	22.342	22.1335	22.2654	22.7949	22.6
Q2FV86	Q2FV86	SAOUHSC_02849		Completeproteome;Oxidoreductase;Pyruvate;Referenceproteome;Thiaminepyrophosphate	63.757	22	43.9	5425400000	144	+	3.03858	-1.0055	0.000613445	24.589	24.8394	25.2211	25.2012	26.0465	25.8773	25.8378	26.1111
Q2FV87	Q2FV87	glcB	Glucoside permease IIC component;Glucoside-specific phosphotransferase enzyme IIA component;Glucoside-specific phosphotransferase enzyme IIB component;PTS system glucoside-specific EIICBA component	Cellmembrane;Completeproteome;Kinase;Membrane;Phosphotransferasesystem;Referenceproteome;Sugartransport;Transferase;Transmembrane;Transmembranehelix;Transport	74.415	11	26.6	5818400000	196		0.209134	-0.0568614	0.429373	25.9501	26.2931	26.066	26.3394	26.3829	26.1973	26.1536	26.1421
Q2FV88	Q2FV88	SAOUHSC_02846		Completeproteome;Referenceproteome	15.445	4	45.6	434690000	44	+	2.49539	-1.20939	0.0019026	21.5443	20.6382	21.6264	21.387	22.2277	22.6522	22.4019	22.7516
Q2FV90	Q2FV90	SAOUHSC_02844		Completeproteome;Referenceproteome	36.847	19	51.6	6905500000	227	+	4.32064	-1.09814	0.000311927	24.3945	24.6954	24.7472	24.8035	25.5958	25.8171	25.8038	25.8165
Q2FV94	Q2FV94	SAOUHSC_02840		Completeproteome;Lyase;Referenceproteome	24.558	12	48.7	3263600000	146	+	4.55713	-3.22901	0	21.9983	22.3731	21.7401	21.0544	25.1706	24.8931	24.9787	25.0395
Q2FV95	Q2FV95	SAOUHSC_02839		Completeproteome;Lyase;Referenceproteome	30.971	21	61.9	8519100000	246	+	5.45039	-2.21989	0	23.285	23.8349	23.8212	23.4855	25.7911	25.7873	25.9089	25.819
Q2FV99	Q2FV99	SAOUHSC_02834		Completeproteome;Referenceproteome	23.541	9	59.2	9109600000	204	+	1.43924	0.108381	0.0171247	26.7589	26.6873	26.7087	26.6267	26.6439	26.602	26.5988	26.5034
Q2FVA1	Q2FVA1	SAOUHSC_02832		Completeproteome;Referenceproteome	24.107	3	18	172400000	6		0.865793	0.987937	0.0681548	22.0042	22.7231	22.2976	22.1073	21.6003	21.8725	19.6622	22.0455
Q2FVA2	Q2FVA2	SAOUHSC_02831		Completeproteome;Referenceproteome	30.566	16	79.7	7586200000	190	+	4.32568	-0.693124	0.000313364	26.5946	26.4204	26.4325	26.5767	27.2639	27.2067	27.2662	27.06
Q2FVA3	Q2FVA3	SAOUHSC_02830		Completeproteome;Oxidoreductase;Referenceproteome	34.803	19	72.7	3821700000	145	+	7.54833	2.07576	0	25.5026	25.4803	25.4525	25.4605	23.5097	23.4237	23.4161	23.2434
Q2FVA4	Q2FVA4	SAOUHSC_02829	Putative NAD(P)H nitroreductase SAOUHSC_02829	Completeproteome;Flavoprotein;FMN;NAD;NADP;Oxidoreductase;Referenceproteome	25.388	13	50.2	4348000000	200	+	1.63881	0.314075	0.0110046	25.2471	25.2418	25.3367	25.1504	24.7728	25.163	25.0131	24.7708
Q2FVA5	Q2FVA5	SAOUHSC_02828		Completeproteome;Referenceproteome	30.059	7	36.2	201150000	45		0.0750921	-0.0577044	0.70855	21.0101	21.3299	20.8121	21.5718	21.5013	21.5406	21.3124	20.6005
Q2FVA6	Q2FVA6	SAOUHSC_02827		Completeproteome;Referenceproteome	10.548	13	100	12044000000	267		0.811234	0.260747	0.0772692	26.3303	26.2505	26.4469	25.895	26.1426	25.85	26.1582	25.7289
Q2FVA7	Q2FVA7	SAOUHSC_02826		Completeproteome;DNA-binding;Referenceproteome;Transcription;Transcriptionregulation	16.516	7	70.8	1323100000	54	+	1.98383	-0.896586	0.00560733	23.7295	23.6008	23.3777	23.0896	24.711	24.6684	24.049	23.9555
Q2FVA9	Q2FVA9	SAOUHSC_02824		Completeproteome;Referenceproteome	21.792	1	14.2	71004000	21		0.12647	0.0926738	0.575461	21.6865	20.4295	21.2583	21.1282	21.2555	20.8624	20.9401	21.0737
Q2FVB2	Q2FVB2	fbp	Fructose-1.6-bisphosphatase class 3	Carbohydratemetabolism;Completeproteome;Hydrolase;Manganese;Referenceproteome	76.174	37	54.1	12377000000	487	+	4.50713	-0.545383	0	24.9336	24.9024	24.9086	25.1029	25.4719	25.5188	25.5202	25.5182
Q2FVB4	Q2FVB4	SAOUHSC_02820		ATP-binding;Completeproteome;Nucleotide-binding;Referenceproteome	25.804	36	100	11169000000	377	+	3.1501	0.948324	0.000653244	26.1424	26.648	26.6223	26.8383	25.5659	25.6368	25.6288	25.6263
Q2FVB5	Q2FVB5	SAOUHSC_02819		Completeproteome;DNA-binding;Referenceproteome;Transcription;Transcriptionregulation	18.079	4	43.4	688300000	41		0.489241	0.191742	0.18178	23.8455	23.3672	23.5165	23.1519	23.4107	23.0549	23.1569	23.4917
Q2FVB9	Q2FVB9	SAOUHSC_02815		Completeproteome;Referenceproteome	47.626	1	3.1	838320000	21	+	3.49218	-2.18471	0.00048	22.6063	23.3226	23.4817	22.7584	24.653	25.2464	25.6289	25.3796
Q2FVC1	Q2FVC1	pgcA	Phosphoglucomutase	Carbohydratemetabolism;Completeproteome;Glucosemetabolism;Isomerase;Magnesium;Metal-binding;Phosphoprotein;Referenceproteome	62.376	35	60.3	5716100000	422	+	2.69453	-0.246936	0.00133099	24.2528	24.227	24.3985	24.3657	24.5079	24.6136	24.5411	24.5689
Q2FVC2	Q2FVC2	SAOUHSC_02791		Completeproteome;Hydrolase;Referenceproteome	14.894	6	56.9	1391100000	52	+	1.68357	0.361894	0.0100302	24.4822	24.5413	24.3738	24.6492	23.9158	24.3758	24.0629	24.2444
Q2FVC3	Q2FVC3	SAOUHSC_02790		ATP-binding;Completeproteome;Nucleotide-binding;Referenceproteome	109.9	45	51.5	4110900000	447	+	1.11662	-0.176864	0.0363465	23.4161	23.442	23.6409	23.7019	23.6545	23.6544	23.8086	23.7908
Q2FVC4	Q2FVC4	SAOUHSC_02789	Uncharacterized lipoprotein SAOUHSC_02789	Cellmembrane;Completeproteome;Lipoprotein;Membrane;Palmitate;Referenceproteome;Signal	30.31	3	16.7	247370000	30		0.378273	0.137892	0.250829	21.1043	21.4725	21.5396	21.4201	21.4227	20.8971	21.2252	21.4399
Q2FVC5	Q2FVC5	SAOUHSC_02788	Uncharacterized lipoprotein SAOUHSC_02788	Cellmembrane;Completeproteome;Lipoprotein;Membrane;Palmitate;Referenceproteome;Signal	30.325	5	22.2	249630000	33	+	2.91541	0.634874	0.000686391	21.9583	21.7207	21.8495	21.9754	21.4663	21.319	21.1256	21.0534
Q2FVD0	Q2FVD0	SAOUHSC_02783	Uncharacterized protein SAOUHSC_02783	3D-structure;Cellmembrane;Completeproteome;Membrane;Referenceproteome;Transmembrane;Transmembranehelix	30.8	2	21.2	402860000	16		0.893	0.765171	0.0643874	23.6331	21.7249	22.3338	22.576	21.7247	21.8025	21.4244	22.2554
Q2FVD4	Q2FVD4	SAOUHSC_02779		Completeproteome;Referenceproteome	11.173	4	35.5	1356500000	68	+	2.64012	0.445304	0.00151959	23.9807	24.1965	24.1627	23.9512	23.5775	23.6839	23.7661	23.4823
Q2FVD5	Q2FVD5	SAOUHSC_02778	Uncharacterized oxidoreductase SAOUHSC_02778	Completeproteome;Oxidoreductase;Referenceproteome	24.604	21	91.8	9320300000	326		0.563202	0.11291	0.147116	25.2806	25.4491	25.4719	25.5164	25.456	25.3764	25.3406	25.0935
Q2FVE0	Q2FVE0	SAOUHSC_02774	Alkyl hydroperoxide reductase AhpD	Antioxidant;Completeproteome;Disulfidebond;Oxidoreductase;Peroxidase;Redox-activecenter;Referenceproteome	16.484	2	14.3	169480000	11	+	1.52549	1.02031	0.0145304	20.5723	21.5839	20.324	21.3336	20.4941	19.7478	19.5825	19.9081
Q2FVE7	Q2FVE7	SAOUHSC_02767		Completeproteome;Referenceproteome	60.076	39	66.9	7447300000	517	+	4.51914	-0.878572	0	23.9187	24.2442	24.0184	24.1723	24.9857	25.026	24.8967	24.9597
Q2FVF0	Q2FVF0	SAOUHSC_02764		ATP-binding;Completeproteome;Nucleotide-binding;Referenceproteome	30.468	3	26.2	144810000	10		0.522931	-0.826124	0.163738	19.9614	23.0266	20.5318	22.0636	21.7355	22.6259	22.1005	22.4259
Q2FVF4	Q2FVF4	SAOUHSC_02760		Completeproteome;Oxidoreductase;Referenceproteome	58.439	23	57.3	2666400000	167	+	1.72914	-0.310091	0.00897027	24.3594	24.4857	24.41	24.6688	24.8086	24.6957	24.6795	24.9805
Q2FVF5	Q2FVF5	SAOUHSC_02759		Completeproteome;Referenceproteome	17.311	15	66.2	9654600000	351	+	5.11716	0.907107	0	25.8144	25.8705	25.8868	25.9578	24.9522	25.1146	24.8402	24.9941
Q2FVF7	Q2FVF7	SAOUHSC_02757		Completeproteome;Referenceproteome	9.7746	6	100	676790000	110		0.73979	-0.321614	0.0924193	22.5918	22.1524	22.7614	21.9557	22.9762	22.5931	22.6677	22.5107
Q2FVF9	Q2FVF9	SAOUHSC_02755		Completeproteome;Referenceproteome	39.192	22	68.7	12733000000	451	+	4.11814	0.634794	0.000490119	26.165	26.3382	26.352	26.3767	25.7252	25.7664	25.6411	25.56
Q2FVG0	Q2FVG0	SAOUHSC_02754		ATP-binding;Completeproteome;Nucleotide-binding;Referenceproteome	25.172	7	53.2	358960000	32		0.693062	-0.703213	0.104654	19.306	20.408	21.4029	20.3342	21.2877	21.5242	20.4009	21.0511
Q2FVG1	Q2FVG1	SAOUHSC_02753		Completeproteome;Referenceproteome	27.901	2	7.8	61588000	11		NaN	0	1	19.9236	20.839	20.0727	19.8323	19.6379	20.3378	21.0796	18.4699
Q2FVG3	Q2FVG3	SAOUHSC_02751	Carboxylic ester hydrolase	Completeproteome;Hydrolase;Referenceproteome	51.968	6	24	2226600000	96		0.12048	-0.0513701	0.589081	23.7341	24.1511	24.0558	24.2879	24.3473	24.0088	24.2134	23.8649
Q2FVG5	Q2FVG5	SAOUHSC_02747		Completeproteome;Referenceproteome	23.8	12	67.3	2238300000	174	+	2.65034	-0.511326	0.0015274	23.3889	23.6784	23.7144	23.5167	24.0598	23.9946	24.2804	24.0088
Q2FVG8	Q2FVG8	SAOUHSC_02744		ATP-binding;Completeproteome;Nucleotide-binding;Referenceproteome	46.173	13	40.4	5413300000	173	+	3.1851	-0.516356	0.000662132	23.6983	24.0088	23.9036	24.0085	24.4377	24.3651	24.5052	24.3766
Q2FVH0	Q2FVH0	SAOUHSC_02742		Completeproteome;Referenceproteome	34.813	16	55.9	904340000	90	+	1.0625	-1.61239	0.0418797	19.7259	20.8115	17.8312	20.9479	22.2358	21.6456	21.1083	20.7764
Q2FVH1	Q2FVH1	SAOUHSC_02741		Completeproteome;Membrane;Referenceproteome;Transmembrane;Transmembranehelix;Transport	25.026	1	5.2	95518000	14		0.657038	-0.376946	0.114376	19.8468	20.4364	20.7675	20.3541	21.2292	20.7756	20.6437	20.2641
Q2FVH3	Q2FVH3	SAOUHSC_02739	2-dehydropantoate 2-reductase	Completeproteome;NADP;Oxidoreductase;Pantothenatebiosynthesis;Referenceproteome	34.444	10	33.4	1229200000	147	+	2.74555	-0.311049	0.00128261	22.4202	22.3405	22.4643	22.331	22.8236	22.7112	22.6786	22.5867
Q2FVH5	Q2FVH5	SAOUHSC_02737		Completeproteome;Referenceproteome	31.192	12	52.7	3408600000	233	+	3.09198	0.504642	0.000634783	24.4394	24.2973	24.2011	24.2802	23.8014	23.7458	23.9771	23.6752
Q2FVH6	Q2FVH6	flp	Protein flp	Cellmembrane;Completeproteome;Membrane;Referenceproteome;Transmembrane;Transmembranehelix	56.448	4	12.2	162030000	41		0.913553	-0.55565	0.0606906	19.5162	20.7595	20.2611	20.0605	20.8458	21.1069	20.5381	20.329
Q2FVI0	Q2FVI0	SAOUHSC_02731		Completeproteome;Membrane;Referenceproteome;Transmembrane;Transport	79.339	10	17.8	447780000	53	+	2.63373	-0.588674	0.00150676	21.1001	20.9838	20.8763	21.2423	21.4751	21.5126	21.8262	21.7432
Q2FVI3	Q2FVI3	SAOUHSC_02727		Completeproteome;Referenceproteome	22.28	5	29.1	416310000	44		0.0200505	0.0131426	0.910624	21.5993	22.2731	21.6402	21.912	21.7589	22.0685	21.4271	22.1175
Q2FVI4	Q2FVI4	SAOUHSC_02726		Completeproteome;Referenceproteome	17.72	3	26.1	82225000	9		0.801019	-0.405603	0.0791522	20.7236	19.5689	19.9131	20.1287	20.649	20.3642	20.5506	20.393
Q2FVI6	Q2FVI6	SAOUHSC_02724		Completeproteome;Referenceproteome	25.799	11	42	594690000	79		0.792149	-0.33098	0.0806427	22.1133	22.5968	22.3907	22.5718	22.7128	22.7396	22.3456	23.1986
Q2FVI7	Q2FVI7	SAOUHSC_02723		Completeproteome;Kinase;Referenceproteome;Transferase	40.66	5	27.6	337310000	38		0.0390773	0.0229526	0.832804	22.6959	22.382	22.3846	22.0748	22.4565	22.7286	22.2946	21.9657
Q2FVK1	Q2FVK1	hlgB	Gamma-hemolysin component B	Completeproteome;Cytolysis;Hemolysis;Referenceproteome;Secreted;Signal;Toxin	36.711	10	42.8	317380000	33	+	3.00801	-3.09118	0.000605809	19.6003	20.8046	18.644	20.5802	23.4096	23.0089	22.771	22.8044
Q2FVK2	Q2FVK2	hlgC	Gamma-hemolysin component C	Completeproteome;Cytolysis;Hemolysis;Referenceproteome;Secreted;Signal;Toxin	35.613	11	42.5	503930000	74	+	3.0337	-4.98035	0.000610879	20.8136	17.2427	19.1192	17.5391	23.5346	23.6443	23.7458	23.7115
Q2FVK3	Q2FVK3	SAOUHSC_02708		Completeproteome;Referenceproteome	34.955	7	32.4	207240000	29	+	1.13028	-1.11913	0.0347838	21.053	20.6851	22.7858	20.9647	22.6087	22.5188	21.9402	22.8974
Q2FVK5	Q2FVK5	sbi	Immunoglobulin-binding protein sbi	Completeproteome;IgG-bindingprotein;Referenceproteome;Repeat;Secreted;Signal;Virulence	50.07	42	79.6	16791000000	566	+	2.89681	-0.863627	0.000795322	25.2777	25.9219	25.7691	25.8317	26.475	26.5371	26.5465	26.6963
Q2FVK8	Q2FVK8	gpmA	2.3-bisphosphoglycerate-dependent phosphoglycerate mutase	Completeproteome;Glycolysis;Isomerase;Referenceproteome	26.68	31	99.1	76215000000	675	+	4.51632	1.01661	0	29.9866	30.093	30.154	30.4047	29.1193	29.1757	29.1769	29.0999
Q2FVL2	Q2FVL2	SAOUHSC_02699		Completeproteome;Referenceproteome	28.904	26	78.8	18892000000	544	+	3.12804	0.308769	0.000648889	26.2731	26.4025	26.3561	26.4798	26.0961	26.1195	26.038	26.0228
Q2FVL3	Q2FVL3	SAOUHSC_02698		Cellmembrane;Completeproteome;Membrane;Referenceproteome;Transmembrane;Transmembranehelix;Transport	26.442	4	21.8	246540000	40		0.407281	0.133069	0.231698	21.8575	22.2829	22.286	22.1516	21.8557	21.8636	22.2964	22.0299
Q2FVL4	Q2FVL4	SAOUHSC_02697		ATP-binding;Completeproteome;Nucleotide-binding;Referenceproteome	27.241	19	82.7	3231200000	261	+	2.4917	0.399454	0.00189644	24.595	24.6542	24.4969	24.5032	24.3513	24.1554	23.982	24.1628
Q2FVL6	Q2FVL6	SAOUHSC_02695		Completeproteome;Referenceproteome	13.798	4	45.7	407580000	57		0.404799	0.143001	0.232643	22.5797	22.9105	22.8799	23.1081	22.5793	22.7003	22.5781	23.0485
Q2FVL7	Q2FVL7	SAOUHSC_02694		Completeproteome;Referenceproteome	23.061	5	28.6	862880000	62	+	1.21344	-0.248506	0.0287586	22.8127	22.9811	23.0613	23.1827	23.1533	23.233	23.1679	23.4777
Q2FVL8	Q2FVL8	SAOUHSC_02684		4Fe-4S;Completeproteome;Heme;Iron;Iron-sulfur;Metal-binding;Oxidoreductase;Referenceproteome	88.656	50	55.9	17392000000	658	+	1.99824	0.326421	0.00538603	26.3401	26.4232	26.4755	26.327	26.2879	25.9983	26.0644	25.9095
Q2FVL9	Q2FVL9	SAOUHSC_02683		Completeproteome;Oxidoreductase;Referenceproteome	11.437	3	15.4	1208000000	82		0.449214	-0.159957	0.204313	23.8361	23.464	23.863	23.515	24.0809	23.5761	23.9849	23.6759
Q2FVM0	Q2FVM0	SAOUHSC_02682		Completeproteome;Methyltransferase;Referenceproteome;S-adenosyl-L-methionine;Transferase	36.347	6	27.1	264010000	36		0.892051	0.461534	0.064544	22.3147	21.9476	21.5416	22.2344	22.0395	21.1485	21.3444	21.6599
Q2FVM1	Q2FVM1	SAOUHSC_02681		4Fe-4S;Completeproteome;Iron;Iron-sulfur;Metal-binding;Molybdenum;Oxidoreductase;Referenceproteome	139.83	73	60.2	16603000000	1003	+	4.46906	0.626916	0	25.73	25.851	25.8163	25.805	25.3219	25.1585	25.1187	25.0954
Q2FVM2	Q2FVM2	SAOUHSC_02680		Completeproteome;Oxidoreductase;Referenceproteome	55.219	15	35.8	4298400000	187	+	2.75147	0.596296	0.00128494	25.4775	25.7568	25.6758	25.563	25.1738	24.8606	25.1933	24.8602
Q2FVM3	Q2FVM3	SAOUHSC_02679		Completeproteome;Referenceproteome	22.925	2	13.3	213590000	16		0.94142	1.57659	0.0562094	22.9963	23.0334	22.642	21.9504	19.0966	22.5803	20.3979	22.2409
Q2FVM4	Q2FVM4	SAOUHSC_02678		Completeproteome;Oxidoreductase;Referenceproteome	26.145	4	26.2	180140000	14		0.505335	0.223804	0.171588	21.9741	21.4565	22.1457	21.7788	21.9052	21.5782	21.7272	21.2492
Q2FVM5	Q2FVM5	SAOUHSC_02677		Completeproteome;Referenceproteome	17.15	6	22.7	327290000	60		0.837876	0.339539	0.0733629	21.4481	21.7162	22.2313	22.0511	21.4337	21.3951	21.4273	21.8325
Q2FVM6	Q2FVM6	nreB	Oxygen sensor histidine kinase NreB	4Fe-4S;ATP-binding;Completeproteome;Cytoplasm;Iron;Iron-sulfur;Kinase;Metal-binding;Nucleotide-binding;Phosphoprotein;Referenceproteome;Transferase;Two-componentregulatorysystem	39.12	11	51.7	769230000	71	+	2.8936	1.16397	0.000793774	23.3382	23.6915	23.358	23.3998	22.2959	22.5904	22.4936	21.7517
Q2FVM7	Q2FVM7	nreC	Oxygen regulatory protein NreC	Activator;Completeproteome;Cytoplasm;DNA-binding;Phosphoprotein;Referenceproteome;Transcription;Transcriptionregulation;Two-componentregulatorysystem	24.368	10	47.5	943070000	84	+	3.89309	0.437947	0.000410596	23.3339	23.3144	23.4149	23.3613	23.0227	22.9562	22.8136	22.8802
Q2FVN1	Q2FVN1	narT	Probable nitrate transporter NarT	Cellmembrane;Completeproteome;Membrane;Nitrateassimilation;Referenceproteome;Transmembrane;Transmembranehelix;Transport	42.148	5	6.2	336910000	45	+	2.238	0.875285	0.00310345	22.4422	22.9595	22.6907	22.2488	21.7689	22.0547	21.3734	21.643
Q2FVN2	Q2FVN2	SAOUHSC_02670		Completeproteome;Referenceproteome	16.305	5	36.6	1404200000	51		0.814262	-0.291671	0.0769569	25.1104	24.606	24.7059	24.364	25.2062	25.0227	24.9385	24.7857
Q2FVN3	Q2FVN3	sarZ	HTH-type transcriptional regulator SarZ	Activator;Completeproteome;Cytoplasm;DNA-binding;Referenceproteome;Transcription;Transcriptionregulation;Virulence	17.435	10	56.8	1168000000	85	+	5.00847	-2.01313	0	22.2526	22.3513	22.5822	22.8615	24.5773	24.3772	24.4905	24.6551
Q2FVN4	Q2FVN4	SAOUHSC_02668		Completeproteome;Referenceproteome	14.007	8	58.7	1134200000	108	+	2.4264	0.651577	0.00215674	22.8986	22.9185	23.0923	22.9944	22.4718	22.5689	21.9541	22.3027
Q2FVN5	Q2FVN5	SAOUHSC_02667		Completeproteome;Membrane;Referenceproteome;Symport;Transmembrane;Transmembranehelix;Transport	46.068	5	11.1	592280000	20		0.165411	-0.435628	0.497966	22.8708	22.6244	21.929	22.9226	23.9588	24.0296	24.05	20.0509
Q2FVN6	Q2FVN6	SAOUHSC_02666		Completeproteome;Referenceproteome	13.34	17	71.2	9878400000	328	+	2.61264	-0.368217	0.00149414	25.6167	25.5763	25.6298	25.8661	26.0393	26.1349	25.9925	25.9952
Q2FVN7	Q2FVN7	SAOUHSC_02665		Completeproteome;Referenceproteome	15.914	14	80	8941800000	274	+	6.963	-0.685382	0	24.7974	24.7402	24.7653	24.6907	25.4532	25.4288	25.4211	25.4319
Q2FVP2	Q2FVP2	SAOUHSC_02660		Completeproteome;Referenceproteome	36.361	4	22.9	284180000	17		0.226426	0.174656	0.406966	23.0938	23.0713	23.0834	23.6905	22.4967	23.7267	22.7742	23.2428
Q2FVP3	Q2FVP3	SAOUHSC_02659		Completeproteome;DNA-binding;Referenceproteome;Transcription;Transcriptionregulation	24.478	2	12.1	64891000	17	+	1.27057	-0.664984	0.0250091	20.6853	19.4704	20.2222	19.9959	20.6302	20.6461	21.1048	20.6527
Q2FVP4	Q2FVP4	SAOUHSC_02658		Completeproteome;Referenceproteome	47.827	4	14.6	80860000	7		0.753334	-0.936398	0.0896403	20.3359	20.6463	18.9379	20.7465	21.5093	19.8457	21.16	21.8973
Q2FVP8	Q2FVP8	SAOUHSC_02654	Ferredoxin--NADP reductase	Completeproteome;FAD;Flavoprotein;NADP;Oxidoreductase;Referenceproteome	38.229	14	51.2	1602400000	112	+	3.33904	0.517176	0.000584158	23.6659	23.4443	23.5691	23.533	22.9175	22.957	23.17	23.0991
Q2FVP9	Q2FVP9	SAOUHSC_02653		Completeproteome;Referenceproteome	12.225	4	71.2	634730000	28	+	1.94078	0.369249	0.00605656	23.7718	23.5879	23.6537	23.4661	23.0567	23.4497	23.2648	23.2314
Q2FVQ0	Q2FVQ0	SAOUHSC_02652		Completeproteome;Referenceproteome	32.865	15	62.3	6820700000	243	+	5.32927	-0.689456	0	24.5013	24.5547	24.6437	24.6946	25.3172	25.2867	25.2802	25.268
Q2FVQ1	Q2FVQ1	SAOUHSC_02651		Completeproteome;Referenceproteome	20.071	9	73.1	1250400000	120	+	4.26383	-0.714185	0.000300885	23.2161	23.0905	23.2676	23.0446	23.7717	23.9265	23.9711	23.8062
Q2FVQ2	Q2FVQ2	SAOUHSC_02650	Uncharacterized lipoprotein SAOUHSC_02650	Cellmembrane;Completeproteome;Lipoprotein;Membrane;Palmitate;Referenceproteome;Signal	23.362	8	60.8	8434300000	105		0.00624104	-0.00145435	0.972135	27.4335	27.4901	27.4172	27.67	27.455	27.4273	27.6581	27.4761
Q2FVQ3	Q2FVQ3	SAOUHSC_02649		Completeproteome;Referenceproteome	64.536	13	38.4	1436100000	109	+	1.47629	0.255883	0.0158162	24.0275	24.2748	24.3412	24.4636	24.0263	24.0062	23.9896	24.0614
Q2FVQ4	Q2FVQ4	SAOUHSC_02648		Completeproteome;Referenceproteome	56.641	8	11.7	3970900000	102		0.151817	0.0703206	0.524	25.8397	26.4531	26.2906	26.5717	26.3353	26.3495	26.0401	26.149
Q2FVQ5	Q2FVQ5	mqo	Probable malate:quinone oxidoreductase	Completeproteome;FAD;Flavoprotein;Oxidoreductase;Referenceproteome;Tricarboxylicacidcycle	54.813	41	65	22227000000	705		0.0701683	-0.0142274	0.724246	25.8286	25.8912	26.0177	26.0665	25.8435	26.0127	26.0608	25.944
Q2FVR4	Q2FVR4	SAOUHSC_02638		Completeproteome;Referenceproteome	37.067	3	11.5	85248000	12		0.673346	-0.922671	0.109873	21.1146	20.8238	20.6477	18.5126	22.0008	21.0194	21.1271	20.6423
Q2FVR9	Q2FVR9	fni	Isopentenyl-diphosphate delta-isomerase	Completeproteome;Cytoplasm;Flavoprotein;FMN;Isomerase;Isoprenebiosynthesis;Magnesium;Metal-binding;NADP;Referenceproteome	38.77	24	61.6	10211000000	361	+	1.26717	0.190402	0.0251107	25.1318	25.4463	25.348	25.405	25.0478	25.195	25.2126	25.114
Q2FVS0	Q2FVS0	SAOUHSC_02622		Completeproteome;Referenceproteome	43.263	2	10.7	308310000	15		0.00996027	-0.00928354	0.956075	21.6292	22.4183	22.4079	22.8202	22.6081	21.8738	22.6739	22.1569
Q2FVS1	Q2FVS1	SAOUHSC_02621	Putative 3-methyladenine DNA glycosylase	Completeproteome;DNAdamage;DNArepair;Hydrolase;Referenceproteome	22.771	5	21.8	214710000	31		0.318181	-0.109008	0.302169	21.8678	22.2088	22.5292	22.1394	22.4165	22.2528	22.3301	22.1819
Q2FVS2	Q2FVS2	SAOUHSC_02620		Completeproteome;Referenceproteome	24.956	8	22.8	1408400000	49	+	2.90679	-0.869013	0.000681018	23.621	23.9946	24.1086	24.326	24.8266	24.9878	24.8693	24.8425
Q2FVS3	Q2FVS3	SAOUHSC_02619		ATP-binding;Completeproteome;Nucleotide-binding;Referenceproteome	33.721	18	51.5	2510300000	165	+	2.40918	-0.187079	0.00238022	23.8607	24.039	23.9974	23.9493	24.1678	24.179	24.1337	24.1143
Q2FVS4	Q2FVS4	SAOUHSC_02618		Completeproteome;Referenceproteome	45.929	5	18	442240000	44	+	1.1746	-0.490379	0.0313873	21.9089	22.1796	21.8828	22.7037	22.5574	22.7666	22.4105	22.9019
Q2FVS7	Q2FVS7	SAOUHSC_02614		Completeproteome;Isomerase;Referenceproteome	39.279	11	44	603990000	69		0.0371465	-0.0226312	0.840017	22.689	22.3442	21.9637	22.4142	22.2442	22.0402	22.7245	22.4928
Q2FVS9	Q2FVS9	SAOUHSC_02613		Completeproteome;Referenceproteome	25.225	5	29.5	5663800000	44	+	1.44902	0.246282	0.0167728	26.8931	26.743	26.9572	26.9505	26.8032	26.7367	26.5103	26.5084
Q2FVT0	Q2FVT0	rpiA	Ribose-5-phosphate isomerase A	Completeproteome;Isomerase;Referenceproteome	25.549	7	21.9	1394500000	73	+	1.37371	0.179828	0.0198843	24.1124	24.0157	23.9922	24.2476	23.8521	23.8776	24.0266	23.8924
Q2FVT1	Q2FVT1	lyrA	Lysostaphin resistance protein A	Cellmembrane;Completeproteome;Membrane;Referenceproteome;Transmembrane;Transmembranehelix	46.785	4	19.3	195070000	35	+	1.69755	-0.668622	0.00978353	21.6088	20.895	21.015	21.3983	22.0351	22.1873	21.7851	21.5841
Q2FVT2	Q2FVT2	hutG	Formimidoylglutamase	Completeproteome;Histidinemetabolism;Hydrolase;Manganese;Metal-binding;Referenceproteome	34.513	10	49.8	3205800000	161	+	2.43383	-0.453094	0.00207874	23.5413	23.4576	23.6905	23.6297	23.922	24.246	24.0871	23.8764
Q2FVT4	Q2FVT4	SAOUHSC_02608		Completeproteome;DNA-binding;Referenceproteome;Transcription;Transcriptionregulation	35.018	3	15	163200000	27	+	4.19349	-2.07187	0.000283333	19.1086	20.0056	19.7883	19.6159	21.7083	21.6082	21.9483	21.541
Q2FVT5	Q2FVT5	hutU	Urocanate hydratase	Completeproteome;Cytoplasm;Histidinemetabolism;Lyase;NAD;Referenceproteome	60.632	44	64.2	18069000000	423	+	7.74033	-3.3336	0	24.3079	24.1659	24.3019	24.551	27.7373	27.6504	27.6026	27.6709
Q2FVT6	Q2FVT6	hutI	Imidazolonepropionase	Completeproteome;Cytoplasm;Histidinemetabolism;Hydrolase;Iron;Metal-binding;Referenceproteome;Zinc	45.038	23	72.1	10174000000	319	+	6.33583	-3.13912	0	23.6303	23.5429	23.3109	23.9031	26.8148	26.7576	26.5526	26.8186
Q2FVT8	Q2FVT8	SAOUHSC_02604		Completeproteome;Referenceproteome	31.734	14	41	4981600000	186	+	5.76972	-2.24194	0	21.7536	21.5543	21.5659	21.2671	23.9121	23.8153	23.5811	23.8002
Q2FVU1	Q2FVU1	SAOUHSC_02601		Completeproteome;Referenceproteome	42.605	3	4.7	106720000	19	+	2.34505	-1.10193	0.00258434	21.1968	20.6481	20.5794	20.4462	22.232	22.0238	21.4115	21.6109
Q2FVU2	Q2FVU2	SAOUHSC_02600		Completeproteome;Referenceproteome	20.083	18	67.3	3848100000	244	+	3.08469	0.923575	0.00063067	24.723	24.6031	24.88	24.791	23.6184	23.5784	23.9546	24.1514
Q2FVU3	Q2FVU3	SAOUHSC_02599		Completeproteome;Referenceproteome	29.784	4	22.4	137900000	17		0.446633	-0.258306	0.205748	20.374	21.1465	20.6521	21.5282	21.2321	21.2566	21.1056	21.1397
Q2FVU4	Q2FVU4	SAOUHSC_02597		Cellmembrane;Completeproteome;Kinase;Membrane;Phosphotransferasesystem;Referenceproteome;Sugartransport;Transferase;Transmembrane;Transmembranehelix;Transport	59.329	12	16.3	6031600000	183	+	3.45494	-0.956046	0.000467532	25.0613	25.4062	25.2276	25.5886	26.0905	26.29	26.3197	26.4076
Q2FVU7	Q2FVU7	SAOUHSC_02594		Completeproteome;Referenceproteome	23.57	11	64.9	3373000000	174		0.296399	-0.0545869	0.32408	24.5853	24.7057	24.8646	24.8899	24.8723	24.8064	24.7395	24.8458
Q2FVV1	Q2FVV1	SAOUHSC_02590		Completeproteome;Membrane;Referenceproteome;Transmembrane	50.352	5	13.1	825570000	57	+	1.59052	-0.482672	0.0122643	22.7587	23.0727	23.4157	23.1772	23.3711	23.5455	23.8076	23.6309
Q2FVV2	Q2FVV2	SAOUHSC_02589		Completeproteome;Referenceproteome	33.004	18	49.7	4561700000	288	+	3.45229	-0.910718	0.000466321	23.3468	23.7779	23.7353	23.8974	24.6998	24.6039	24.5934	24.5031
Q2FVV6	Q2FVV6	SAOUHSC_02585		Completeproteome;DNA-binding;Referenceproteome	26.618	12	33.5	2083600000	143	+	3.17477	-0.483227	0.000659142	23.7648	23.7629	23.7632	24.0454	24.2705	24.3744	24.3492	24.2751
Q2FVV7	Q2FVV7	SAOUHSC_02584		Completeproteome;Referenceproteome	30.385	3	18.5	88885000	10		0.0962001	-0.164014	0.648468	21.6904	20.3142	21.0297	21.2259	22.1088	21.6108	19.6064	21.5902
Q2FVV8	Q2FVV8	SAOUHSC_02583		Completeproteome;Referenceproteome	33.804	25	80.1	6550000000	426	+	4.66451	-0.657762	0	24.2036	24.358	24.2765	24.3134	24.9826	25.0193	24.8157	24.965
Q2FVV9	Q2FVV9	SAOUHSC_02582	Putative formate dehydrogenase SAOUHSC_02582	2Fe-2S;4Fe-4S;Completeproteome;Iron;Iron-sulfur;Metal-binding;Molybdenum;NAD;Oxidoreductase;Referenceproteome;Repeat	111.24	41	43.4	13084000000	598	+	4.69577	-0.49071	0	25.3708	25.4035	25.4043	25.4867	25.8521	25.9367	25.9847	25.8547
Q2FVW0	Q2FVW0	SAOUHSC_02581		Completeproteome;Referenceproteome	17.478	7	40.1	566550000	57	+	0.989088	-1.21486	0.0497441	19.9606	22.6068	22.2351	22.4944	23.2651	22.8962	22.9799	23.0151
Q2FVW2	Q2FVW2	SAOUHSC_02580		Completeproteome;Referenceproteome	24.389	6	46.7	1496500000	74	+	1.48208	-0.340777	0.0156017	23.7001	23.4142	23.4912	23.4795	23.7137	23.842	23.7219	24.1704
Q2FVW3	Q2FVW3	SAOUHSC_02579		Completeproteome;Referenceproteome	41.89	22	62.3	4880300000	242	+	2.29497	0.446786	0.00266276	25.0583	25.3506	25.4329	25.4797	24.7728	24.9123	24.9775	24.8718
Q2FVW4	Q2FVW4	SAOUHSC_02577	Putative 2-hydroxyacid dehydrogenase SAOUHSC_02577	Completeproteome;NAD;Oxidoreductase;Referenceproteome	34.674	46	98.7	82224000000	898	+	2.14486	0.218989	0.00384358	28.715	28.7512	28.7869	28.9537	28.6044	28.6077	28.5751	28.5435
Q2FVW7	Q2FVW7	SAOUHSC_02556		Completeproteome;Referenceproteome	32.028	7	30.9	526460000	51	+	1.89839	0.159417	0.00626196	22.8243	22.9626	22.8762	22.8262	22.7791	22.6423	22.678	22.7522
Q2FVW8	Q2FVW8	SAOUHSC_02555		Completeproteome;Referenceproteome	6.6286	2	48.3	1061700000	33		0.0165067	0.0216541	0.926381	22.8169	24.5357	24.481	24.4032	23.723	23.8301	24.1908	24.4063
Q2FVW9	Q2FVW9	SAOUHSC_02554		3D-structure;Completeproteome;Referenceproteome	34.011	38	84.4	20106000000	558	+	7.6871	1.49599	0	27.5869	27.5663	27.6713	27.6782	26.0794	26.1155	26.2036	26.1202
Q2FVX0	Q2FVX0	SAOUHSC_02553		Completeproteome;Referenceproteome	35.362	9	37.1	1214700000	136	+	2.36439	0.388678	0.00260395	23.9839	24.2579	23.8824	24.0163	23.7084	23.6147	23.5598	23.7029
Q2FVX2	Q2FVX2	SAOUHSC_02551		Completeproteome;Referenceproteome	29.668	2	6.6	65277000	15		0.0808567	0.063447	0.690236	20.9227	20.2225	21.269	20.7699	20.7774	21.0506	20.2168	20.8855
Q2FVX3	Q2FVX3	fdhD	Protein FdhD homolog	Completeproteome;Cytoplasm;Referenceproteome	29.415	7	34	414660000	49	+	1.55017	1.04667	0.013807	21.0268	22.4461	22.3848	21.9643	20.8835	21.2852	20.9535	20.5131
Q2FVX4	Q2FVX4	SAOUHSC_02549		Completeproteome;Referenceproteome	29.051	34	76.9	11923000000	446	+	7.08809	0.575697	0	26.2205	26.225	26.1919	26.2647	25.6667	25.653	25.663	25.6166
Q2FVX6	Q2FVX6	SAOUHSC_02546		ATP-binding;Completeproteome;Nucleotide-binding;Referenceproteome	22.877	11	64.7	480960000	36	+	1.99013	0.624555	0.00555381	22.9079	22.6607	22.6659	23.362	22.165	22.3434	22.317	22.2729
Q2FVX7	Q2FVX7	SAOUHSC_02545		Completeproteome;Referenceproteome	37.92	7	23.4	354050000	54		0.357847	0.138558	0.266703	21.9995	22.2952	22.3464	21.717	21.7625	21.8829	22.0211	22.1375
Q2FVX8	Q2FVX8	SAOUHSC_02544	Molybdenum cofactor biosynthesis protein B	Completeproteome;Molybdenumcofactorbiosynthesis;Referenceproteome	18.5	15	94.6	7055900000	268	+	1.69887	0.226428	0.0098066	26.2944	26.4956	26.5589	26.4758	26.2568	26.125	26.3354	26.2017
Q2FVX9	Q2FVX9	moaC	Cyclic pyranopterin monophosphate synthase accessory protein	Completeproteome;Molybdenumcofactorbiosynthesis;Referenceproteome	17.694	12	66.5	2852200000	142	+	2.30649	0.264143	0.00267452	24.3584	24.5172	24.6281	24.4316	24.1939	24.183	24.2378	24.264
Q2FVY0	Q2FVY0	SAOUHSC_02542		Completeproteome;Referenceproteome	45.016	20	56.3	9813500000	422	+	2.96431	0.361193	0.000701613	25.6306	25.8722	25.7862	25.8742	25.4407	25.4886	25.3855	25.4036
Q2FVY1	Q2FVY1	SAOUHSC_02541		Completeproteome;Referenceproteome	18.569	4	23	187360000	45		0.330642	-0.099721	0.290075	21.6333	21.4493	21.5795	21.6435	21.9701	21.56	21.7581	21.4164
Q2FVY2	Q2FVY2	SAOUHSC_02540		Completeproteome;Referenceproteome	17.338	12	84.5	1912300000	117		0.154156	-0.0396142	0.520378	23.7007	23.7042	23.9044	23.7839	23.9398	23.5588	23.8843	23.8687
Q2FVY3	Q2FVY3	moaD	Molybdopterin synthase sulfur carrier subunit	Completeproteome;Molybdenumcofactorbiosynthesis;Nucleotide-binding;Referenceproteome	8.871	4	75.3	112560000	18		0.221527	0.136167	0.413232	21.3066	21.6027	21.7041	20.6563	21.2132	20.9765	21.2333	21.3021
Q2FVY4	Q2FVY4	mobA	Probable molybdenum cofactor guanylyltransferase	Completeproteome;Cytoplasm;GTP-binding;Magnesium;Metal-binding;Molybdenumcofactorbiosynthesis;Nucleotide-binding;Referenceproteome;Transferase	22.541	5	41.7	485070000	55		0.517621	0.146393	0.16558	22.3216	22.5863	22.7549	22.8113	22.3167	22.5769	22.6021	22.3929
Q2FVY9	Q2FVY9	sarV	HTH-type transcriptional regulator SarV	Activator;Completeproteome;Cytoplasm;DNA-binding;Referenceproteome;Transcription;Transcriptionregulation;Virulence	13.986	4	45.7	96464000	23		0.115846	-0.168643	0.599526	20.8553	19.2011	21.4762	20.8331	20.2367	20.5143	21.2869	21.0023
Q2FVZ1	Q2FVZ1	SAOUHSC_02530		Completeproteome;DNA-binding;Referenceproteome;Transcription;Transcriptionregulation	17.152	2	33.6	238540000	8		0.273315	0.929839	0.347718	19.0604	22.9686	23.1635	22.8486	22.3796	19.5115	23.2006	19.2301
Q2FVZ2	Q2FVZ2	SAOUHSC_02529		Completeproteome;Referenceproteome	30.049	10	55.5	1330500000	111	+	1.22302	0.27676	0.028201	23.4544	23.709	23.6984	23.958	23.284	23.3875	23.4704	23.5709
Q2FVZ4	Q2FVZ4	femX	Lipid II:glycine glycyltransferase	Acyltransferase;Antibioticresistance;Cellshape;Cellwallbiogenesis/degradation;Completeproteome;Cytoplasm;Peptidoglycansynthesis;Referenceproteome;Transferase	48.521	45	84.3	24526000000	856	+	4.48468	0.591275	0	26.7669	26.8449	26.8017	26.9639	26.19	26.3228	26.2085	26.2911
Q2FVZ5	Q2FVZ5	SAOUHSC_02525		Completeproteome;Referenceproteome	114.7	24	28.9	2556300000	223	+	2.96195	0.402315	0.000700201	23.3794	23.2949	23.3461	23.5419	22.8915	22.9465	23.0281	23.0868
Q2FVZ7	Q2FVZ7	SAOUHSC_02523		Completeproteome;Referenceproteome	6.3941	8	90.7	931350000	79		0.903293	0.5436	0.0628706	24.1126	23.1411	23.7085	23.1254	23.1471	22.9201	23.3657	22.4802
Q2FW01	Q2FW01	SAOUHSC_02519		Completeproteome;Referenceproteome	34.763	10	49.8	1931000000	113	+	2.67103	0.488823	0.00139792	24.0375	24.1793	24.0068	24.3505	23.7062	23.6297	23.5174	23.7656
Q2FW03	Q2FW03	topB	DNA topoisomerase 3	Completeproteome;DNA-binding;Isomerase;Magnesium;Metal-binding;Referenceproteome;Topoisomerase	81.551	40	58.1	5663400000	532		0.105233	0.0145469	0.62697	23.4444	23.4875	23.5297	23.5624	23.3794	23.4718	23.586	23.5286
Q2FW05	Q2FW05	SAOUHSC_02515		Completeproteome;Referenceproteome	14.638	1	9.3	874160000	32	+	3.08938	1.11199	0.000632035	24.9233	24.3178	24.729	24.4831	23.5578	23.5273	23.7478	23.1725
Q2FW06	Q2FW06	rplC	50S ribosomal protein L3	Completeproteome;Referenceproteome;Ribonucleoprotein;Ribosomalprotein;RNA-binding;rRNA-binding	23.718	38	97.3	166830000000	1335		0.888315	-0.100354	0.0649852	28.5506	28.3952	28.5278	28.3929	28.6783	28.5138	28.5167	28.5592
Q2FW07	Q2FW07	rplD	50S ribosomal protein L4	Completeproteome;Referenceproteome;Ribonucleoprotein;Ribosomalprotein;RNA-binding;rRNA-binding	22.464	33	95.2	258680000000	1060	+	2.38623	-0.173573	0.00256442	30.5757	30.6461	30.5381	30.6377	30.8406	30.8005	30.7213	30.7294
Q2FW08	Q2FW08	rplW	50S ribosomal protein L23	Completeproteome;Referenceproteome;Ribonucleoprotein;Ribosomalprotein;RNA-binding;rRNA-binding	10.605	20	97.8	162030000000	494		0.678133	-0.159949	0.108518	30.1985	29.6823	30.0229	29.9485	30.1148	30.0906	30.2319	30.0547
Q2FW10	Q2FW10	rpsS	30S ribosomal protein S19	Completeproteome;Referenceproteome;Ribonucleoprotein;Ribosomalprotein;RNA-binding;rRNA-binding	10.615	24	95.7	161460000000	895		0.41559	-0.101286	0.226666	29.8727	30.1416	30.2395	30.1943	30.0074	30.3006	30.3	30.2451
Q2FW11	Q2FW11	rplV	50S ribosomal protein L22	Completeproteome;Referenceproteome;Ribonucleoprotein;Ribosomalprotein;RNA-binding;rRNA-binding	12.835	25	87.2	236590000000	902	+	1.21889	-0.107522	0.0282902	30.2793	30.2731	30.3518	30.2903	30.3536	30.3544	30.3834	30.5332
Q2FW12	Q2FW12	rpsC	30S ribosomal protein S3	Completeproteome;Referenceproteome;Ribonucleoprotein;Ribosomalprotein;RNA-binding;rRNA-binding	24.099	52	99.5	342090000000	1485	+	1.59552	-0.188207	0.012	30.1582	30.2955	30.3584	30.2343	30.3221	30.4938	30.5412	30.4421
Q2FW13	Q2FW13	rplP	50S ribosomal protein L16	Completeproteome;Referenceproteome;Ribonucleoprotein;Ribosomalprotein;RNA-binding;rRNA-binding;tRNA-binding	16.242	19	86.1	141910000000	632	+	1.42013	-0.400486	0.0177624	29.3567	29.7799	30.0062	29.8212	29.9761	30.1132	30.2149	30.2618
Q2FW14	Q2FW14	rpmC	50S ribosomal protein L29	Completeproteome;Referenceproteome;Ribonucleoprotein;Ribosomalprotein	8.0902	14	85.5	72208000000	279	+	4.27153	-0.457693	0.000303571	30.2969	30.3188	30.1722	30.1488	30.7149	30.6578	30.7128	30.6821
Q2FW15	Q2FW15	rpsQ	30S ribosomal protein S17	Completeproteome;Referenceproteome;Ribonucleoprotein;Ribosomalprotein;RNA-binding;rRNA-binding	10.175	18	88.5	64392000000	490		0.749859	-0.122699	0.0900772	29.0706	29.1513	29.3308	29.2877	29.2772	29.2202	29.3711	29.4626
Q2FW16	Q2FW16	rplN	50S ribosomal protein L14	Completeproteome;Referenceproteome;Ribonucleoprotein;Ribosomalprotein;RNA-binding;rRNA-binding	13.135	23	75.4	146570000000	540		0.163623	-0.0327497	0.500638	29.3113	29.2346	29.4289	29.2806	29.2475	29.3035	29.2972	29.5382
Q2FW17	Q2FW17	rplX	50S ribosomal protein L24	Completeproteome;Referenceproteome;Ribonucleoprotein;Ribosomalprotein;RNA-binding;rRNA-binding	11.536	21	87.6	57460000000	473	+	3.70791	-0.366074	0.000378049	28.0538	27.9372	27.8874	27.9423	28.4068	28.2874	28.2863	28.3045
Q2FW18	Q2FW18	rplE	50S ribosomal protein L5	Completeproteome;Referenceproteome;Ribonucleoprotein;Ribosomalprotein;RNA-binding;rRNA-binding;tRNA-binding	20.266	50	98.3	345470000000	1232	+	3.62872	-0.301636	0.000524781	30.9287	30.9616	31.0806	30.9952	31.2488	31.2749	31.3461	31.3027
Q2FW19	Q2FW19	rpsZ	30S ribosomal protein S14 type Z	Completeproteome;Metal-binding;Referenceproteome;Ribonucleoprotein;Ribosomalprotein;RNA-binding;rRNA-binding;Zinc	7.2996	6	41	5000800000	93	+	1.77445	-0.283209	0.00816908	24.9982	25.2274	25.2404	25.3783	25.4105	25.515	25.4729	25.5787
Q2FW20	Q2FW20	rpsH	30S ribosomal protein S8	Completeproteome;Referenceproteome;Ribonucleoprotein;Ribosomalprotein;RNA-binding;rRNA-binding	14.831	30	100	194090000000	991	+	1.79026	-0.164774	0.00807308	30.4301	30.4878	30.5566	30.484	30.5489	30.6405	30.6742	30.7541
Q2FW21	Q2FW21	rplF	50S ribosomal protein L6	Completeproteome;Referenceproteome;Ribonucleoprotein;Ribosomalprotein;RNA-binding;rRNA-binding	19.786	25	88.8	186540000000	708		0.339872	-0.0410199	0.281425	30.2055	30.1701	30.133	30.1895	30.1826	30.0923	30.3109	30.2763
Q2FW22	Q2FW22	rplR	50S ribosomal protein L18	Completeproteome;Referenceproteome;Ribonucleoprotein;Ribosomalprotein;RNA-binding;rRNA-binding	13.097	27	93.3	124900000000	718	+	1.41453	-0.199949	0.0179225	29.8376	29.6545	29.6574	29.5146	29.9617	29.843	29.8737	29.7856
Q2FW23	Q2FW23	rpsE	30S ribosomal protein S5	Completeproteome;Referenceproteome;Ribonucleoprotein;Ribosomalprotein;RNA-binding;rRNA-binding	17.742	38	95.8	473320000000	1148	+	1.24986	-0.210077	0.0260757	30.7274	30.805	30.9575	30.7453	30.8433	30.9595	31.1236	31.1492
Q2FW27	Q2FW27	adk	Adenylate kinase	ATP-binding;Completeproteome;Cytoplasm;Kinase;Metal-binding;Nucleotide-binding;Nucleotidebiosynthesis;Referenceproteome;Transferase;Zinc	23.974	35	91.6	48823000000	629		0.634263	-0.182036	0.121861	28.274	28.0646	28.2574	27.7155	28.2224	28.2124	28.3908	28.214
Q2FW28	Q2FW28	infA	Translation initiation factor IF-1	Completeproteome;Cytoplasm;Initiationfactor;Proteinbiosynthesis;Referenceproteome	8.2796	9	98.6	26761000000	215		0.0322501	-0.0140567	0.862162	28.6185	28.5386	29.0418	28.4094	28.543	28.5816	28.7988	28.7412
Q2FW30	Q2FW30	rpsM	30S ribosomal protein S13	Completeproteome;Referenceproteome;Ribonucleoprotein;Ribosomalprotein;RNA-binding;rRNA-binding;tRNA-binding	13.719	32	92.6	136750000000	759	+	4.13839	-0.34414	0.000497992	29.8812	29.8624	29.768	29.8658	30.1346	30.1617	30.2127	30.2451
Q2FW31	Q2FW31	rpsK	30S ribosomal protein S11	Completeproteome;Referenceproteome;Ribonucleoprotein;Ribosomalprotein;RNA-binding;rRNA-binding	13.882	20	77.5	151540000000	736	+	1.09772	-0.134926	0.0386604	29.2772	29.3685	29.2979	29.5411	29.474	29.4837	29.4935	29.5732
Q2FW32	Q2FW32	rpoA	DNA-directed RNA polymerase subunit alpha	Completeproteome;DNA-directedRNApolymerase;Nucleotidyltransferase;Referenceproteome;Transcription;Transferase	35.011	39	94.9	180350000000	1065		0.907957	0.0676746	0.0619493	30.0275	29.9375	29.9436	30.0025	29.8749	29.9859	29.9314	29.8482
Q2FW33	Q2FW33	rplQ	50S ribosomal protein L17	Completeproteome;Referenceproteome;Ribonucleoprotein;Ribosomalprotein	13.748	26	98.4	221070000000	691	+	1.81711	-0.225435	0.00775862	29.782	29.8726	30.047	29.887	30.0161	30.1194	30.1886	30.1663
Q2FW34	Q2FW34	ecfA1	Energy-coupling factor transporter ATP-binding protein EcfA1	ATP-binding;Cellmembrane;Completeproteome;Hydrolase;Membrane;Nucleotide-binding;Referenceproteome;Transport	30.05	5	25.7	87910000	19	+	2.56201	-1.23345	0.00175658	20.3354	19.3768	19.3212	19.8948	20.9288	20.9379	21.1902	20.8051
Q2FW35	Q2FW35	ecfA2	Energy-coupling factor transporter ATP-binding protein EcfA2	ATP-binding;Cellmembrane;Completeproteome;Hydrolase;Membrane;Nucleotide-binding;Referenceproteome;Transport	32.918	5	21	162440000	29		0.324358	-0.401804	0.296178	21.7871	20.7037	19.9607	20.9367	20.7072	21.9658	21.7932	20.5293
Q2FW37	Q2FW37	truA	tRNA pseudouridine synthase A	Completeproteome;Isomerase;Referenceproteome;tRNAprocessing	31.279	8	33.3	2131700000	21	+	1.11282	-0.944524	0.0368308	23.4741	25.2306	24.948	24.9607	26.0364	25.2008	25.8027	25.3516
Q2FW38	Q2FW38	rplM	50S ribosomal protein L13	Completeproteome;Referenceproteome;Ribonucleoprotein;Ribosomalprotein	16.333	34	100	334880000000	1320	+	1.1869	-0.195141	0.0305373	29.859	29.9806	30.107	30.1557	30.0688	30.2181	30.3258	30.2701
Q2FW39	Q2FW39	rpsI	30S ribosomal protein S9	Completeproteome;Referenceproteome;Ribonucleoprotein;Ribosomalprotein	14.83	18	85.6	156940000000	405	+	4.3947	-0.473138	0.000334975	30.3546	30.4727	30.5077	30.4537	30.852	30.8883	30.974	30.9668
Q2FW43	Q2FW43	SAOUHSC_02474		Completeproteome;Referenceproteome	25.961	1	4.8	43002000	12		0.589867	-0.602171	0.137793	19.7752	20.8145	20.7407	20.086	20.1081	20.9502	20.7041	22.0626
Q2FW45	Q2FW45	SAOUHSC_02472		Completeproteome;Referenceproteome	44.1	3	15.1	153970000	21		0.181108	-0.106387	0.470534	20.9103	21.7512	21.4681	21.2559	21.2524	21.5502	21.1888	21.8195
Q2FW49	Q2FW49	SAOUHSC_02468		Completeproteome;Referenceproteome;Thiaminepyrophosphate;Transferase	61.173	12	35.2	569430000	74		0.321112	-0.415377	0.299753	20.2661	21.3244	22.5337	21.2228	20.948	22.1758	21.7004	22.1844
Q2FW50	Q2FW50	SAOUHSC_02467		Completeproteome;Lyase;Referenceproteome	26.223	3	22.2	234000000	26	+	1.17875	-0.580322	0.0310888	20.5521	20.8404	21.0819	21.4939	21.2697	21.5803	21.4091	22.0305
Q2FW52	Q2FW52	SAOUHSC_02465	Uncharacterized hydrolase SAOUHSC_02465	Completeproteome;Hydrolase;Referenceproteome	31.836	14	66.4	2881700000	190		0.426973	-0.0921264	0.218221	24.6121	24.6746	24.5006	24.5212	24.7968	24.7794	24.6812	24.4197
Q2FW57	Q2FW57	SAOUHSC_02460		Completeproteome;Referenceproteome	32.202	17	64.9	3836600000	153	+	5.47687	-2.04309	0	21.6832	21.8026	21.9878	22.1641	23.7783	23.9594	24.1049	23.9675
Q2FW59	Q2FW59	SAOUHSC_02458		Completeproteome;Referenceproteome	24.055	5	35.1	264390000	34	+	3.08953	0.48524	0.000633406	22.1506	22.2863	22.1994	22.2774	21.9	21.5828	21.6721	21.8179
Q2FW62	Q2FW62	SAOUHSC_02445		Completeproteome;Referenceproteome	37.269	15	61.3	1806000000	149		0.547801	0.164629	0.153791	24.4447	24.4971	24.5601	24.682	24.7369	24.2043	24.4129	24.1713
Q2FW63	Q2FW63	SAOUHSC_02444		Cellmembrane;Completeproteome;Membrane;Referenceproteome;Transmembrane;Transmembranehelix;Transport	57.635	2	2.7	75332000	6		NaN	0	1	19.9652	19.9797	19.7584	20.1368	20.7507	21.2349	18.8245	19.4453
Q2FW64	Q2FW64	SAOUHSC_02443		Completeproteome;Referenceproteome	20.8	23	57.3	8230000000	240	+	6.89491	-1.89844	0	22.4129	22.5566	22.69	22.6412	24.4903	24.4715	24.5341	24.3985
Q2FW65	Q2FW65	SAOUHSC_02442		Completeproteome;Referenceproteome	9.2229	4	40.5	391600000	25	+	1.80607	-2.08311	0.00791667	18.4671	18.5899	19.9733	20.7095	22.2102	21.8318	20.9109	21.1193
Q2FW66	Q2FW66	asp23	Alkaline shock protein 23	Completeproteome;Referenceproteome	19.191	35	88.2	53373000000	650	+	6.34091	-1.97273	0	25.5247	25.5549	25.5109	25.4743	27.7419	27.4209	27.389	27.404
Q2FW70	Q2FW70	SAOUHSC_02436		Completeproteome;Referenceproteome	76.087	15	36.3	1467100000	155		0.137966	-0.0462384	0.550581	22.5234	22.7122	22.9738	22.8959	22.7648	22.6834	22.7996	23.0423
Q2FW72	Q2FW72	SAOUHSC_02434		Completeproteome;Referenceproteome	67.211	8	17.4	820050000	26	+	1.02051	0.982419	0.0461825	24.3541	23.8311	22.4102	23.6159	22.67	22.1617	23.3202	22.1298
Q2FW75	Q2FW75	SAOUHSC_02430		Completeproteome;Referenceproteome	36.591	41	81	33211000000	681	+	5.0752	0.935219	0	27.674	27.9087	27.8676	27.8246	26.7607	26.8897	26.9565	26.9272
Q2FW79	Q2FW79	SAOUHSC_02425	UPF0457 protein SAOUHSC_02425	Completeproteome;Referenceproteome	10.006	15	98.8	68238000000	566	+	7.08028	-1.67452	0	28.0718	27.8474	27.9605	28.0163	29.6438	29.7079	29.6642	29.5784
Q2FW81	Q2FW81	SAOUHSC_02423	Probable uridylyltransferase SAOUHSC_02423	Completeproteome;Nucleotidyltransferase;Referenceproteome;Transferase	44.893	35	74.4	18827000000	607	+	4.0516	0.414795	0.000460967	26.6299	26.7196	26.6309	26.6732	26.3284	26.2597	26.2663	26.1401
Q2FW86	Q2FW86	SAOUHSC_02417		Completeproteome;Referenceproteome	31.789	18	66.1	9927300000	247		0.502796	0.0808668	0.173008	26.4351	26.602	26.4827	26.477	26.5583	26.4964	26.3007	26.3179
Q2FW91	Q2FW91	SAOUHSC_02409	Arginase	Argininemetabolism;Completeproteome;Hydrolase;Manganese;Metal-binding;Referenceproteome	33.264	16	67.2	4937800000	225	+	4.98687	-1.3831	0	23.5556	23.6056	23.6403	23.6961	24.7221	25.0882	25.1683	25.0513
Q2FW92	Q2FW92	SAOUHSC_02407		Completeproteome;Referenceproteome	30.079	7	22.7	1629100000	94	+	2.10895	0.720369	0.00431535	24.2161	24.2046	24.6064	24.5425	23.4207	23.4039	23.9231	23.9404
Q2FW93	Q2FW93	SAOUHSC_02406		Completeproteome;Referenceproteome	34.624	20	52.3	5221400000	380	+	3.70798	0.624784	0.000379205	24.5147	24.5331	24.4061	24.7503	23.949	23.9933	23.9015	23.8613
Q2FW95	Q2FW95	SAOUHSC_02404		Completeproteome;Referenceproteome;Secreted	263.01	8	5.3	293440000	14		0.297657	-0.525458	0.322992	21.3618	20.7583	24.0356	22.6879	22.4611	22.7587	22.6865	23.0391
Q2FW96	Q2FW96	mtlD	Mannitol-1-phosphate 5-dehydrogenase	Completeproteome;NAD;Oxidoreductase;Referenceproteome	40.937	25	75.5	5669500000	305	+	4.47685	-0.988237	0	23.0821	23.309	23.3427	23.4769	24.2721	24.1955	24.3489	24.3471
Q2FW97	Q2FW97	SAOUHSC_02402		Completeproteome;Referenceproteome;Transferase	15.542	9	81.9	3619600000	121	+	3.16443	-0.902306	0.00065618	24.4487	24.4892	24.7023	24.1678	25.3898	25.1691	25.5821	25.2762
Q2FW99	Q2FW99	SAOUHSC_02400		Cellmembrane;Completeproteome;Membrane;Phosphotransferasesystem;Referenceproteome;Sugartransport;Transferase;Transmembrane;Transmembranehelix;Transport	55.065	5	11.1	243020000	26	+	1.27341	-0.439436	0.0249697	21.3467	21.1639	21.2032	21.5168	22.1516	21.5371	21.8719	21.4276
Q2FWA0	Q2FWA0	glmS	Glutamine--fructose-6-phosphate aminotransferase [isomerizing]	Aminotransferase;Completeproteome;Cytoplasm;Glutamineamidotransferase;Referenceproteome;Transferase	65.849	55	74	93297000000	1119	+	3.8141	-0.691517	0.000398714	27.8011	27.7161	27.745	27.8213	28.3504	28.3051	28.6099	28.5843
Q2FWA1	Q2FWA1	SAOUHSC_02397		ATP-binding;Completeproteome;Nucleotide-binding;Referenceproteome	29.005	2	13.8	307330000	16	+	1.68879	-2.12995	0.0100888	19.9055	19.9422	20.0957	22.62	23.0798	23.0346	22.4332	22.5356
Q2FWA2	Q2FWA2	SAOUHSC_02396		Completeproteome;Referenceproteome	32.298	19	62.1	7847200000	332	+	3.48729	-0.179677	0.00047619	25.6778	25.6933	25.6644	25.6657	25.831	25.9155	25.8073	25.8662
Q2FWA8	Q2FWA8	SAOUHSC_02390		Completeproteome;Referenceproteome	40.665	10	28.1	4825300000	168		0.698331	0.113927	0.102993	25.2726	25.4183	25.3794	25.3621	25.421	25.1698	25.2974	25.0885
Q2FWB0	Q2FWB0	SAOUHSC_02388		Completeproteome;DNA-binding;Referenceproteome;Transcription;Transcriptionregulation	11.989	7	83	675860000	64	+	1.74218	-0.529276	0.00870504	22.6328	23.1502	22.6748	22.5086	23.4252	23.1549	23.4072	23.0962
Q2FWB1	Q2FWB1	SAOUHSC_02387		Completeproteome;Referenceproteome	24.032	16	57.9	2575900000	109	+	4.4062	-1.57476	0.000336634	22.4727	22.0193	22.2033	22.3691	23.8719	24.0102	23.5264	23.9549
Q2FWB5	Q2FWB5	SAOUHSC_02383		Completeproteome;Referenceproteome	52.946	25	56.9	7420300000	485	+	2.14071	-0.252053	0.00389972	24.2743	24.2008	24.3895	24.3735	24.4904	24.4998	24.6861	24.5699
Q2FWB6	Q2FWB6	SAOUHSC_02382		Completeproteome;Referenceproteome	16.254	7	44.5	647380000	66		0.25616	-0.100564	0.367572	22.3157	22.8306	23.027	22.9138	22.7896	22.9504	22.8709	22.8784
Q2FWB7	Q2FWB7	SAOUHSC_02381		Completeproteome;Referenceproteome	16.691	12	82.3	15281000000	240	+	3.29345	0.727842	0.00056057	27.4902	27.6488	27.4988	27.3375	26.8323	26.9802	26.607	26.6444
Q2FWB8	Q2FWB8	deoD	Purine nucleoside phosphorylase DeoD-type	Completeproteome;Glycosyltransferase;Referenceproteome;Transferase	25.908	29	65.3	119860000000	801		0.533585	0.203937	0.159915	29.3137	29.4114	29.4602	28.7003	28.9905	29.0414	28.9983	29.0397
Q2FWB9	Q2FWB9	deoC	Deoxyribose-phosphate aldolase	Completeproteome;Cytoplasm;Lyase;Referenceproteome;Schiffbase	23.327	26	80	36492000000	700	+	1.1163	-0.1343	0.0363575	27.9886	28.1725	27.9577	27.9676	28.2161	28.1724	28.0479	28.1872
Q2FWC1	Q2FWC1	pdp	Pyrimidine-nucleoside phosphorylase	Completeproteome;Glycosyltransferase;Referenceproteome;Transferase	46.308	49	88.7	50904000000	1147	+	2.26203	-0.236884	0.00286792	27.2289	27.2876	27.1652	27.189	27.5824	27.4804	27.3701	27.3853
Q2FWC3	Q2FWC3	luxS	S-ribosylhomocysteine lyase	Autoinducersynthesis;Completeproteome;Iron;Lyase;Metal-binding;Quorumsensing;Referenceproteome	17.514	12	40.4	40161000000	404	+	2.72893	0.541399	0.00127338	28.1891	28.5322	28.5957	28.422	27.7681	27.9777	27.9715	27.856
Q2FWC4	Q2FWC4	SAOUHSC_02374		Completeproteome;Referenceproteome	42.958	14	54.1	972520000	86	+	1.6582	1.27998	0.0106866	23.2724	23.6597	23.5731	23.4846	22.0558	22.5883	23.0665	21.1592
Q2FWC6	Q2FWC6	SAOUHSC_02372		Completeproteome;Referenceproteome	25.855	10	38.6	3953000000	197	+	1.56273	0.541433	0.0133348	24.7051	24.7802	24.8825	25.1286	23.9381	24.3727	24.7293	24.2905
Q2FWC7	Q2FWC7	coaW	Type II pantothenate kinase	ATP-binding;CoenzymeAbiosynthesis;Completeproteome;Cytoplasm;Directproteinsequencing;Kinase;Nucleotide-binding;Referenceproteome;Transferase	29.097	12	55.8	2410800000	157	+	2.88281	0.521955	0.000792233	24.34	24.5088	24.6306	24.2348	23.9483	23.9033	23.828	23.9466
Q2FWC9	Q2FWC9	SAOUHSC_02370		Completeproteome;Referenceproteome	33.11	14	49.7	3909700000	198	+	3.46501	0.765674	0.000471204	25.2044	25.0718	25.3306	25.1377	24.169	24.5688	24.4187	24.5253
Q2FWD0	Q2FWD0	rpoE	Probable DNA-directed RNA polymerase subunit delta	Completeproteome;DNA-directedRNApolymerase;Nucleotidyltransferase;Referenceproteome;Transcription;Transferase	20.881	10	48.3	12497000000	146	+	1.532	0.357698	0.0144079	27.2494	27.5195	27.2026	26.9727	26.7892	26.9779	26.7712	26.9751
Q2FWD1	Q2FWD1	pyrG	CTP synthase	ATP-binding;Completeproteome;Glutamineamidotransferase;Ligase;Nucleotide-binding;Pyrimidinebiosynthesis;Referenceproteome	59.981	48	84.3	50600000000	828	+	4.83232	-0.539491	0	27.5188	27.5926	27.4937	27.4865	28.1131	28.1292	28.0224	27.9848
Q2FWD2	Q2FWD2	SAOUHSC_02367		Completeproteome;Referenceproteome	20.164	3	20.2	557770000	37		0.0152169	-0.0127983	0.930845	23.1601	23.756	23.8147	24.2631	23.3376	23.6406	23.9531	24.1138
Q2FWD3	Q2FWD3	SAOUHSC_02366		Completeproteome;Lyase;Metal-binding;Referenceproteome;Zinc	30.836	36	97.2	310560000000	1083	+	6.83882	1.07036	0	31.4676	31.5047	31.457	31.3858	30.4421	30.4193	30.3114	30.3608
Q2FWD4	Q2FWD4	murA	UDP-N-acetylglucosamine 1-carboxyvinyltransferase	Cellcycle;Celldivision;Cellshape;Cellwallbiogenesis/degradation;Completeproteome;Cytoplasm;Peptidoglycansynthesis;Pyruvate;Referenceproteome;Transferase	45.074	28	67.1	14979000000	480	+	4.71428	0.561135	0	25.7649	25.8026	25.7687	25.9526	25.2795	25.2401	25.2893	25.2353
Q2FWD5	Q2FWD5	SAOUHSC_02364		Completeproteome;Referenceproteome	12.686	9	69.4	1222100000	83	+	1.62624	0.249342	0.0109545	24.1487	24.11	24.1534	24.4222	24.0762	23.8837	23.9344	23.9427
Q2FWD6	Q2FWD6	SAOUHSC_02363	Putative aldehyde dehydrogenase SAOUHSC_02363	Completeproteome;NAD;Oxidoreductase;Referenceproteome	51.968	38	80.2	18490000000	656	+	4.20296	0.641745	0.000289362	26.1795	26.406	26.3753	26.3766	25.6709	25.7237	25.7794	25.5965
Q2FWD7	Q2FWD7	rho	Transcription termination factor Rho	ATP-binding;Completeproteome;Helicase;Hydrolase;Nucleotide-binding;Referenceproteome;RNA-binding;Transcription;Transcriptionregulation;Transcriptiontermination	49.97	39	68.3	23949000000	788	+	3.55082	0.474121	0.000498615	26.4199	26.5282	26.5615	26.6399	25.9895	26.0065	26.1797	26.0772
Q2FWD8	Q2FWD8	rpmE2	50S ribosomal protein L31 type B	Completeproteome;Referenceproteome;Ribonucleoprotein;Ribosomalprotein	9.7228	17	100	60447000000	460		0.159547	-0.034513	0.508753	28.2226	27.994	28.0959	27.9793	28.263	28.0333	28.1443	27.9891
Q2FWD9	Q2FWD9	tdk	Thymidine kinase	ATP-binding;Completeproteome;Cytoplasm;DNAsynthesis;Kinase;Metal-binding;Nucleotide-binding;Referenceproteome;Transferase;Zinc	22.214	13	88.4	6932100000	212	+	5.34539	0.986267	0	26.1098	26.1996	26.0167	26.0073	25.1903	25.0892	24.9783	25.1305
Q2FWE0	Q2FWE0	prfA	Peptide chain release factor 1	Completeproteome;Cytoplasm;Methylation;Proteinbiosynthesis;Referenceproteome	40.349	34	71.2	39097000000	681	+	6.12755	0.826073	0	28.2937	28.2853	28.4243	28.3029	27.4794	27.5409	27.4502	27.5315
Q2FWE1	Q2FWE1	prmC	Release factor glutamine methyltransferase	Completeproteome;Methyltransferase;Referenceproteome;S-adenosyl-L-methionine;Transferase	31.73	5	28.1	593620000	37	+	3.09202	1.47691	0.000636166	23.2059	24.1731	24.1416	23.8499	22.4953	22.1691	22.3034	22.495
Q2FWE2	Q2FWE2	SAOUHSC_02357	Threonylcarbamoyl-AMP synthase	ATP-binding;Completeproteome;Cytoplasm;Nucleotide-binding;Nucleotidyltransferase;Referenceproteome;Transferase;tRNAprocessing	40.445	17	55.6	1169100000	120	+	2.61581	0.510694	0.00149664	23.5275	23.7441	23.5306	23.6374	23.2627	23.2175	23.0369	22.8798
Q2FWE3	Q2FWE3	ptpB	Low molecular weight protein-tyrosine-phosphatase PtpB	Completeproteome;Hydrolase;Proteinphosphatase;Referenceproteome	15.788	3	35.3	565160000	44	+	1.43715	0.673887	0.0172574	22.4229	23.2671	23.0155	23.4665	22.675	22.1707	22.3667	22.264
Q2FWE4	Q2FWE4	SAOUHSC_02355	UPF0340 protein SAOUHSC_02355	Completeproteome;Referenceproteome	18.895	4	18.4	1272200000	66	+	1.9343	0.665537	0.00609744	23.9819	24.3361	24.3274	24.3391	23.3034	23.7951	23.9254	23.2984
Q2FWE5	Q2FWE5	glyA	Serine hydroxymethyltransferase	Amino-acidbiosynthesis;Completeproteome;Cytoplasm;One-carbonmetabolism;Pyridoxalphosphate;Referenceproteome;Transferase	45.172	52	73.1	67345000000	954	+	8.00218	1.64969	0	28.5979	28.4902	28.5262	28.5334	26.8118	26.9318	26.9421	26.8633
Q2FWE6	Q2FWE6	upp	Uracil phosphoribosyltransferase	Allostericenzyme;Completeproteome;Glycosyltransferase;GTP-binding;Magnesium;Nucleotide-binding;Referenceproteome;Transferase	23.05	39	96.7	93891000000	823	+	4.19958	0.913099	0.00028692	29.2764	29.6506	29.432	29.567	28.5199	28.5917	28.4823	28.6798
Q2FWE7	Q2FWE7	atpH	ATP synthase subunit delta	ATPsynthesis;Cellmembrane;CF(1);Completeproteome;Hydrogeniontransport;Iontransport;Membrane;Referenceproteome;Transport	20.498	26	97.2	25300000000	458		0.109239	-0.0423751	0.616606	26.5878	26.9989	27.0584	27.2139	26.982	26.8697	27.0893	27.0875
Q2FWE8	Q2FWE8	atpA	ATP synthase subunit alpha	ATP-binding;ATPsynthesis;Cellmembrane;CF(1);Completeproteome;Hydrogeniontransport;Hydrolase;Iontransport;Membrane;Nucleotide-binding;Referenceproteome;Transport	54.583	47	55.2	193190000000	1097		0.924218	-0.0644422	0.0594855	29.4963	29.5237	29.4854	29.6249	29.5667	29.5895	29.6409	29.5909
Q2FWE9	Q2FWE9	atpG	ATP synthase gamma chain	ATPsynthesis;Cellmembrane;CF(1);Completeproteome;Hydrogeniontransport;Hydrolase;Iontransport;Membrane;Referenceproteome;Transport	29.474	24	78.5	42708000000	632		0.07454	-0.0130072	0.70948	27.6181	27.4848	27.5767	27.7323	27.6245	27.5535	27.5723	27.7136
Q2FWF0	Q2FWF0	atpD	ATP synthase subunit beta	ATP-binding;ATPsynthesis;Cellmembrane;CF(1);Completeproteome;Hydrogeniontransport;Hydrolase;Iontransport;Membrane;Nucleotide-binding;Referenceproteome;Transport	51.4	63	88.5	269690000000	1993	+	1.57284	-0.118794	0.012878	29.6053	29.6648	29.5528	29.7366	29.7605	29.7332	29.76	29.7809
Q2FWF1	Q2FWF1	atpC	ATP synthase epsilon chain	ATPsynthesis;Cellmembrane;CF(1);Completeproteome;Hydrogeniontransport;Iontransport;Membrane;Referenceproteome;Transport	14.844	20	100	9940800000	294		0.0213635	0.00619316	0.905156	26.2929	26.0183	25.9426	26.1005	26.2281	26.1064	26.0765	25.9185
Q2FWF4	Q2FWF4	murA	UDP-N-acetylglucosamine 1-carboxyvinyltransferase	Cellcycle;Celldivision;Cellshape;Cellwallbiogenesis/degradation;Completeproteome;Cytoplasm;Peptidoglycansynthesis;Pyruvate;Referenceproteome;Transferase	44.94	37	82.9	18326000000	470		0.506342	0.0508819	0.171128	26.1926	26.2704	26.1295	26.0724	26.1556	26.1346	26.0848	26.0863
Q2FWF5	Q2FWF5	fabZ	3-hydroxyacyl-[acyl-carrier-protein] dehydratase FabZ	Completeproteome;Cytoplasm;LipidAbiosynthesis;Lipidbiosynthesis;Lipidmetabolism;Lyase;Referenceproteome	16.081	10	49.3	1413300000	94	+	2.68878	0.675807	0.00132865	24.7743	24.4831	24.3268	24.4481	24.0808	23.844	23.6926	23.7116
Q2FWF6	Q2FWF6	SAOUHSC_02335		Completeproteome;Referenceproteome	19.422	6	44.3	1894600000	61	+	3.02934	-1.39982	0.000608333	22.1494	22.8373	23.045	22.1812	24.058	23.8964	23.9834	23.8744
Q2FWF8	Q2FWF8	sceD	Probable transglycosylase SceD	Completeproteome;Directproteinsequencing;Glycosidase;Hydrolase;Referenceproteome;Secreted;Signal	24.066	2	28.6	36580000	10	+	1.35955	-0.727609	0.0204234	19.4736	19.3069	19.5882	19.6146	20.522	19.4212	20.3002	20.6503
Q2FWG1	Q2FWG1	SAOUHSC_02330		ATP-binding;Completeproteome;Kinase;Nucleotide-binding;Referenceproteome;Transferase	30.228	6	29	153270000	27	+	2.05645	-1.23868	0.00459838	19.8138	20.585	20.2893	19.1434	20.9599	21.2769	21.2979	21.2516
Q2FWG4	Q2FWG4	yidC	Membrane protein insertase YidC	Cellmembrane;Chaperone;Completeproteome;Lipoprotein;Membrane;Palmitate;Proteintransport;Referenceproteome;Signal;Transmembrane;Transmembranehelix;Transport	33.581	14	33.4	3687300000	234		0.314031	-0.0585065	0.306822	23.8469	24.0431	24.1014	24.1035	24.1245	24.0503	24.1942	23.96
Q2FWG7	Q2FWG7	SAOUHSC_02324		Completeproteome;Referenceproteome	24.634	6	33	601380000	70	+	3.67877	0.532059	0.000370149	22.2394	22.1391	22.3318	22.3481	21.7012	21.8692	21.6969	21.6628
Q2FWG8	Q2FWG8	SAOUHSC_02323	Cardiolipin synthase	Cellmembrane;Completeproteome;Lipidbiosynthesis;Lipidmetabolism;Membrane;Phospholipidbiosynthesis;Phospholipidmetabolism;Referenceproteome;Repeat;Transferase;Transmembrane;Transmembranehelix	56.517	14	28.7	1087500000	79		0.752836	0.171408	0.0897345	22.9107	23.3195	23.177	23.3869	23.0851	22.9299	23.0053	23.0883
Q2FWG9	Q2FWG9	SAOUHSC_02322		Completeproteome;Referenceproteome	11.198	8	89.7	998520000	61		0.94264	-0.181768	0.055929	22.457	22.8763	22.7058	22.7582	22.855	22.8274	23.01	22.8321
Q2FWH0	Q2FWH0	SAOUHSC_02321		Completeproteome;Referenceproteome	7.8437	1	34.8	1101600000	20		0.38206	-0.202217	0.247563	24.5616	24.6201	25.2313	24.788	25.4021	24.6434	25.176	24.7884
Q2FWH1	Q2FWH1	SAOUHSC_02320		Completeproteome;Referenceproteome	5.07	1	24.4	43956000	14	+	1.58374	-0.782595	0.012539	20.7646	20.6196	20.6886	19.8748	21.0893	21.7151	21.3319	20.9418
Q2FWH2	Q2FWH2	SAOUHSC_02319		Completeproteome;Membrane;Referenceproteome;Transmembrane;Transmembranehelix	44.601	3	10.2	193210000	20		0.923939	-0.307668	0.0594331	21.8183	22.0353	22.0435	22.0272	22.1953	22.6025	21.8809	22.4762
Q2FWH3	Q2FWH3	ddl	D-alanine--D-alanine ligase	ATP-binding;Cellshape;Cellwallbiogenesis/degradation;Completeproteome;Cytoplasm;Ligase;Magnesium;Manganese;Metal-binding;Nucleotide-binding;Peptidoglycansynthesis;Referenceproteome	40.23	26	64	18360000000	445	+	4.82619	0.67635	0	26.473	26.5487	26.4023	26.5711	25.9281	25.8004	25.8073	25.7538
Q2FWH4	Q2FWH4	SAOUHSC_02317	UDP-N-acetylmuramoyl-tripeptide--D-alanyl-D-alanine ligase	ATP-binding;Cellcycle;Celldivision;Cellshape;Cellwallbiogenesis/degradation;Completeproteome;Ligase;Nucleotide-binding;Peptidoglycansynthesis;Referenceproteome	50.052	26	48.9	16258000000	355	+	4.59195	0.710153	0	26.7199	26.6523	26.8326	26.7357	25.8879	26.038	26.0531	26.1208
Q2FWH5	Q2FWH5	cshA	DEAD-box ATP-dependent RNA helicase CshA	ATP-binding;Completeproteome;Cytoplasm;Helicase;Hydrolase;Nucleotide-binding;Referenceproteome;RNA-binding;Stressresponse	56.942	56	78.7	39706000000	893	+	2.48735	-0.460034	0.00189338	26.4592	26.8322	26.8203	26.8287	27.1742	27.1163	27.2255	27.2645
Q2FWH6	Q2FWH6	SAOUHSC_02315		Completeproteome;DNA-binding;Phosphoprotein;Referenceproteome;Transcription;Transcriptionregulation;Two-componentregulatorysystem	26.511	2	4.8	64030000	18	+	2.5737	-1.25324	0.00166997	19.8082	19.7886	19.5446	19.9419	21.2534	21.4781	20.3617	21.0029
Q2FWI2	Q2FWI2	SAOUHSC_02309		Completeproteome;Referenceproteome	18.972	9	57.9	604540000	71	+	2.01994	-0.50367	0.00489125	22.0951	22.4708	22.5155	22.569	23.1428	22.7717	22.8426	22.908
Q2FWI3	Q2FWI3	SAOUHSC_02308		Completeproteome;Referenceproteome	60.745	8	14.6	397190000	66	+	1.58728	-0.51408	0.0123352	21.1046	21.2302	21.6229	21.4801	21.7376	21.7227	21.7736	22.2601
Q2FWI4	Q2FWI4	SAOUHSC_02307		Completeproteome;Referenceproteome	19.405	4	27	374040000	43	+	4.0152	-0.562537	0.000444444	21.4871	21.7341	21.7179	21.565	22.22	22.2027	22.173	22.1586
Q2FWI8	Q2FWI8	mazF	mRNA interferase MazF	Completeproteome;Endonuclease;Hydrolase;Nuclease;Referenceproteome;RNA-binding;Toxin	13.442	5	40.8	723670000	46		0.392284	0.116574	0.240348	23.6325	23.8846	23.4041	23.4326	23.3875	23.3894	23.4375	23.6731
Q2FWJ3	Q2FWJ3	rsbW	Serine-protein kinase RsbW	ATP-binding;Completeproteome;Kinase;Nucleotide-binding;Referenceproteome;Serine/threonine-proteinkinase;Transferase	17.921	15	72.3	10823000000	272	+	3.68335	-0.479134	0.000371257	25.5052	25.7023	25.6274	25.5612	25.9922	26.0539	26.0718	26.1948
Q2FWJ4	Q2FWJ4	SAOUHSC_02298	RNA polymerase sigma factor	Completeproteome;DNA-binding;Referenceproteome;Sigmafactor;Transcription;Transcriptionregulation	29.443	7	30.1	686330000	43	+	2.423	-0.403152	0.00228125	22.9244	22.9738	22.9723	22.8737	23.5861	23.3129	23.2171	23.2408
Q2FWJ5	Q2FWJ5	SAOUHSC_02297		Completeproteome;Referenceproteome	80.934	67	73.3	29058000000	1134	+	4.97475	0.42028	0	25.6508	25.6201	25.6578	25.7585	25.2452	25.2415	25.2779	25.2414
Q2FWJ6	Q2FWJ6	SAOUHSC_02296	Protein SprT-like	Completeproteome;Cytoplasm;Metal-binding;Referenceproteome;Zinc	18.186	1	7.9	123160000	22		0.673685	1.01187	0.10976	21.5215	21.7576	22.0126	21.7663	21.4392	18.6004	21.4906	21.4804
Q2FWK4	Q2FWK4	ilvC	Ketol-acid reductoisomerase	Amino-acidbiosynthesis;Branched-chainaminoacidbiosynthesis;Completeproteome;NADP;Oxidoreductase;Referenceproteome	36.955	9	33.8	410690000	95	+	3.60566	0.434836	0.000514286	21.8883	21.7964	21.9177	21.9259	21.4083	21.436	21.5832	21.3613
Q2FWK6	Q2FWK6	SAOUHSC_02282	Acetolactate synthase	Amino-acidbiosynthesis;Branched-chainaminoacidbiosynthesis;Completeproteome;Magnesium;Metal-binding;Referenceproteome;Thiaminepyrophosphate;Transferase	64.491	3	8.5	118760000	8		0.11745	-0.0762949	0.595794	21.1857	21.3083	20.9523	22.0587	21.5363	21.4666	21.444	21.3632
Q2FWK9	Q2FWK9	SAOUHSC_02280		Completeproteome;Referenceproteome	16.441	6	44.4	1149700000	82		0.176741	0.0626187	0.477194	23.8221	24.3122	24.0947	24.1183	24.002	23.782	24.0788	24.234
Q2FWL0	Q2FWL0	SAOUHSC_02279		Completeproteome;Referenceproteome	24.536	11	45.9	915610000	100		0.0027754	0.00137329	0.986136	22.8018	23.285	22.7567	22.6323	22.9141	22.6249	22.9557	22.9757
Q2FWL2	Q2FWL2	tsaD	tRNA N6-adenosine threonylcarbamoyltransferase	Acyltransferase;Completeproteome;Cytoplasm;Iron;Metal-binding;Referenceproteome;Transferase;tRNAprocessing	36.818	15	51.6	2598300000	226		0.755965	-0.0516171	0.0891065	23.8076	23.7393	23.7872	23.8348	23.7811	23.8953	23.8177	23.8813
Q2FWL3	Q2FWL3	SAOUHSC_02276		Completeproteome;Referenceproteome	61.321	14	24.8	2707900000	86	+	2.70012	-1.09417	0.00133569	23.7126	24.3841	24.1427	24.6512	25.1572	25.2704	25.4648	25.375
Q2FWL5	Q2FWL5	SAOUHSC_02274		ATP-binding;Completeproteome;Nucleotide-binding;Referenceproteome	74.46	29	54.2	3432800000	270	+	2.49678	-0.308557	0.00190569	24.5991	24.4849	24.5482	24.6966	24.8827	24.7953	25.0209	24.8641
Q2FWL6	Q2FWL6	rex	Redox-sensing transcriptional repressor Rex	Completeproteome;Cytoplasm;DNA-binding;NAD;Referenceproteome;Repressor;Transcription;Transcriptionregulation	23.599	17	63.5	7662800000	185		0.195295	-0.0435681	0.448574	26.0055	26.2014	26.1997	25.937	26.1406	26.0285	26.2827	26.066
Q2FWM0	Q2FWM0	SAOUHSC_02269		Completeproteome;DNA-binding;Referenceproteome;Transcription;Transcriptionregulation	35.499	7	31.3	1090700000	89		0.961473	-0.17634	0.0538127	23.4451	23.4114	23.5974	23.2034	23.5553	23.6121	23.7093	23.486
Q2FWM1	Q2FWM1	SAOUHSC_02268		Completeproteome;Glycosidase;Hydrolase;Referenceproteome	57.927	26	45.7	2585400000	223		0.0339418	0.00552654	0.854829	22.8523	22.8519	22.9937	22.9122	22.8161	22.941	23.0026	22.8282
Q2FWM2	Q2FWM2	SAOUHSC_02267		Completeproteome;Kinase;Referenceproteome;Transferase	34.991	8	46.7	1410600000	82		0.0308299	0.0141234	0.868015	23.7004	24.1791	23.6794	24.0698	24.0243	23.8136	23.6699	24.0644
Q2FWM4	Q2FWM4	SAOUHSC_02265		Completeproteome;Referenceproteome	24.253	12	46.6	8490600000	237	+	1.05503	-0.292334	0.0425548	24.8756	24.5965	24.8111	24.9224	24.7811	25.0627	25.3834	25.1478
Q2FWM5	Q2FWM5	SAOUHSC_02264		Completeproteome;Referenceproteome	47.983	8	24.6	889290000	87		0.203047	0.174858	0.437872	22.4594	23.3649	22.8687	23.6593	23.0993	23.2624	22.2918	22.9993
Q2FWM7	Q2FWM7	agrB	Accessory gene regulator protein B	Cellmembrane;Completeproteome;Hydrolase;Membrane;Protease;Quorumsensing;Referenceproteome;Transmembrane;Transmembranehelix;Virulence	21.929	4	20.1	517060000	40	+	1.08168	-0.459353	0.0400373	21.8693	22.7977	22.561	22.2755	23.0729	22.6405	22.7374	22.8901
Q2FWM9	Q2FWM9	SAOUHSC_02259		Completeproteome;Referenceproteome	29.825	6	28.7	677090000	52	+	2.1582	0.616713	0.00379804	22.895	22.9616	23.3992	22.8053	22.4973	22.5356	22.3728	22.1885
Q2FWN0	Q2FWN0	SAOUHSC_02258		Completeproteome;Referenceproteome	24.004	8	47.1	1955000000	160	+	1.49646	-0.26177	0.0152931	22.9254	22.9195	23.085	23.2697	23.4359	23.3188	23.2453	23.2466
Q2FWN3	Q2FWN3	groS	10 kDa chaperonin	Chaperone;Completeproteome;Cytoplasm;Referenceproteome	10.416	18	100	9417600000	338		0.612384	0.194602	0.129115	25.9677	25.7293	25.7769	25.3288	25.6674	25.3798	25.5714	25.4056
Q2FWN4	Q2FWN4	groL	60 kDa chaperonin	ATP-binding;Chaperone;Completeproteome;Cytoplasm;Nucleotide-binding;Referenceproteome	57.664	67	90	178400000000	1648	+	5.1623	0.334452	0	29.9293	29.8812	29.8737	29.8904	29.5699	29.5995	29.5058	29.5617
Q2FWN6	Q2FWN6	SAOUHSC_02246		Completeproteome;Referenceproteome	34.843	4	18.8	361890000	43	+	2.0001	0.340402	0.00540026	22.9399	22.6997	22.9512	23.0843	22.4502	22.6211	22.5867	22.6554
Q2FWN7	Q2FWN7	SAOUHSC_02245		Completeproteome;Referenceproteome	33.222	4	27.8	1291900000	11		0.114659	-0.120369	0.602174	24.6863	24.8643	24.495	25.5475	24.7767	24.4758	24.895	25.9272
Q2FWN8	Q2FWN8	SAOUHSC_02244		Completeproteome;Hydrolase;Referenceproteome	45.097	6	29	436230000	43	+	1.99772	-1.50298	0.00537895	21.2708	20.5659	19.4131	20.0325	22.0327	21.8517	21.8364	21.5734
Q2FWN9	Q2FWN9	SAOUHSC_02243	Uncharacterized leukocidin-like protein 2	Completeproteome;Referenceproteome;Signal	40.434	34	67.8	12775000000	400	+	6.00473	-2.93699	0	24.3281	24.0231	24.2559	24.686	27.4018	27.1645	27.246	27.2289
Q2FWP0	Q2FWP0	SAOUHSC_02241	Uncharacterized leukocidin-like protein 1	Completeproteome;Referenceproteome;Secreted;Signal	38.686	37	83.1	10443000000	469	+	6.58059	-2.6978	0	23.8846	23.9964	23.9017	24.2886	26.8644	26.6395	26.6413	26.7173
Q2FWP4	Q2FWP4			Completeproteome;Referenceproteome	5.3279	3	50	1168800000	93	+	1.65414	-0.383904	0.0108073	22.8438	22.9674	22.5751	23.0727	23.257	23.0775	23.393	23.2671
Q2FWP6	Q2FWP6	SAOUHSC_02235		Completeproteome;Referenceproteome	29.064	8	42.2	2234300000	142	+	3.54297	-0.581127	0.000495868	24.4811	24.5057	24.6772	24.5659	24.9746	25.1294	25.1672	25.2833
Q2FWP9	Q2FWP9	SAOUHSC_02232		Completeproteome;Referenceproteome	20.935	4	23.5	316970000	18		0.407028	-0.221882	0.231684	21.4179	22.0417	21.9053	21.0641	21.7029	22.0524	21.6942	21.867
Q2FWQ4	Q2FWQ4	SAOUHSC_02226		Completeproteome;Referenceproteome	24.56	3	25.7	20358000000	20		0.201679	-0.0725827	0.440088	27.7871	28.1427	28.4218	28.1929	28.2346	28.3339	28.0662	28.2001
Q2FWR2	Q2FWR2	SAOUHSC_02218		Completeproteome;Referenceproteome	11.1	7	76.3	6735100000	119	+	1.6912	0.239122	0.00999063	26.1305	26.3967	26.3554	26.2613	26.0804	25.9027	26.0916	26.1128
Q2FWT0	Q2FWT0	SAOUHSC_02200		Completeproteome;Referenceproteome	18.46	2	26.3	41556000	18		0.0531496	-0.0231013	0.779506	20.5373	20.3909	20.9043	20.4306	20.6153	20.856	20.4632	20.4209
Q2FWU0	Q2FWU0	SAOUHSC_02185		Completeproteome;Referenceproteome	34.938	8	48.6	868200000	14		0.049791	0.0779738	0.792624	24.3603	24.9961	23.1359	22.9946	23.2285	24.3616	24.0749	23.51
Q2FWV3	Q2FWV3	SAOUHSC_02171		Completeproteome;Kinase;Referenceproteome;Transferase	18.504	4	52.8	164140000	19		0.250796	0.35017	0.373804	21.5042	22.0874	20.8385	20.9711	22.0997	21.4974	19.8936	20.5098
Q2FWV5	Q2FWV5	chp	Chemotaxis inhibitory protein	Completeproteome;Referenceproteome;Secreted;Signal;Virulence	17.039	4	37.6	288360000	14	+	0.988399	-0.438232	0.049883	21.6407	22.401	22.0266	22.0473	22.1758	22.4271	22.9425	22.3231
Q2FWV6	Q2FWV6	scn	Staphylococcal complement inhibitor	Completeproteome;Referenceproteome;Secreted;Signal;Virulence	13.052	9	51.7	12257000000	149	+	1.36586	-0.551856	0.0200412	26.3237	26.9193	26.6484	26.9812	27.3691	27.6366	26.903	27.1713
Q2FWW1	Q2FWW1	SAOUHSC_02161		Completeproteome;Referenceproteome	65.573	52	64.4	8217400000	531	+	5.21064	-1.80578	0	23.2918	23.4778	23.5293	23.6788	25.2439	25.5675	25.1357	25.2537
Q2FWW3	Q2FWW3	SAOUHSC_02158		Completeproteome;Referenceproteome	48.119	18	62.6	14289000000	261		0.196488	0.0402184	0.446944	26.9906	27.2193	27.0829	27.206	26.926	27.0756	27.2114	27.1249
Q2FWW6	Q2FWW6	SAOUHSC_02155		Completeproteome;DNA-binding;Referenceproteome;Transcription;Transcriptionregulation	14.532	11	68.3	1116000000	128	+	1.54048	0.420664	0.0140197	23.2142	22.6386	22.8041	22.5841	22.4291	22.2838	22.4023	22.4432
Q2FWW7	Q2FWW7	SAOUHSC_02154		ATP-binding;Completeproteome;Nucleotide-binding;Referenceproteome	34.52	17	51.7	1413900000	126		0.679731	0.28675	0.108026	22.5218	22.6772	23.077	22.8061	22.0848	22.3634	22.6336	22.8533
Q2FWW9	Q2FWW9	SAOUHSC_02152		ATP-binding;Completeproteome;Nucleotide-binding;Referenceproteome	32.952	39	80.3	17585000000	532		0.84987	0.177927	0.0709333	25.4534	25.6568	25.8655	25.6265	25.3498	25.3828	25.6015	25.5563
Q2FWX0	Q2FWX0	SAOUHSC_02151		Completeproteome;Referenceproteome	28.139	2	11.8	130980000	11		0.0743017	-0.0932136	0.709825	21.4659	19.8245	21.7011	21.5088	21.2966	21.2212	20.9191	21.4362
Q2FWX1	Q2FWX1	SAOUHSC_02150		Completeproteome;Referenceproteome	21.916	22	73.8	49126000000	510	+	6.44772	0.722733	0	28.5941	28.5741	28.5675	28.657	27.9002	27.9185	27.8666	27.8165
Q2FWX2	Q2FWX2	SAOUHSC_02149		Completeproteome;Referenceproteome	20.589	8	45.4	13018000000	72	+	1.55586	0.359433	0.0134686	28.2373	27.8757	28.2305	28.1017	27.6944	27.5846	27.7163	28.0122
Q2FWX3	Q2FWX3	SAOUHSC_02148		Completeproteome;Referenceproteome	18.055	4	30.6	320310000	24	+	1.92861	0.472564	0.00619108	22.7852	23.1446	22.9614	22.795	22.6471	22.591	22.2197	22.338
Q2FWX4	Q2FWX4	SAOUHSC_02147		Completeproteome;Referenceproteome	31.619	10	50.7	857460000	130	+	3.28466	0.553985	0.00055792	23.2577	23.1786	23.0788	23.2237	22.6471	22.5757	22.4785	22.8216
Q2FWX5	Q2FWX5	SAOUHSC_02146		Completeproteome;Referenceproteome	40.354	15	43.9	1164200000	186	+	2.70669	-0.41837	0.00133805	22.1584	22.403	22.4133	22.1646	22.612	22.7604	22.7639	22.6764
Q2FWX6	Q2FWX6	SAOUHSC_02145		Completeproteome;Referenceproteome	6.5647	5	24.6	6247000000	121		0.583818	0.195854	0.139061	26.2846	26.6403	26.7981	26.8191	26.514	26.3715	26.2073	26.6659
Q2FWX8	Q2FWX8	SAOUHSC_02143	Uncharacterized protein SAOUHSC_02143	Completeproteome;Referenceproteome	38.546	22	70.2	10681000000	367		0.439932	0.0756698	0.210335	25.9087	26.2033	26.0796	26.2062	25.945	26.0085	26.095	26.0465
Q2FWX9	Q2FWX9	SAOUHSC_02142	Aldehyde dehydrogenase	Completeproteome;Oxidoreductase;Referenceproteome	51.741	27	46.6	4021900000	244	+	3.21769	-0.707223	0.000545035	24.0145	24.1471	24.037	24.4292	24.7585	24.8564	25.0026	24.8392
Q2FWY1	Q2FWY1	ppaC	Probable manganese-dependent inorganic pyrophosphatase	Completeproteome;Cytoplasm;Hydrolase;Manganese;Metal-binding;Referenceproteome	34.068	26	65.7	42075000000	615	+	3.38031	0.405393	0.000592965	28.8415	28.8809	28.7042	28.6953	28.3037	28.4229	28.4391	28.3345
Q2FWY2	Q2FWY2	SAOUHSC_02139		Completeproteome;Hydrolase;Referenceproteome	21.199	9	48.4	518500000	72	+	2.6572	1.24622	0.00139071	22.741	23.7775	23.4282	23.3869	22.0737	21.9495	22.4112	21.9142
Q2FWY6	Q2FWY6	SAOUHSC_02121		Completeproteome;Referenceproteome	45.38	24	75.4	7601800000	373	+	3.24047	0.527515	0.000551402	25.7481	25.8735	26.0126	25.7382	25.1882	25.4097	25.3097	25.3546
Q2FWY8	Q2FWY8	gatC	Aspartyl/glutamyl-tRNA(Asn/Gln) amidotransferase subunit C	ATP-binding;Completeproteome;Ligase;Nucleotide-binding;Proteinbiosynthesis;Referenceproteome	11.267	13	99	12416000000	281		0.415416	0.245449	0.226623	27.7501	26.9268	27.3517	26.7138	26.6768	26.7919	27.0788	27.2132
Q2FWY9	Q2FWY9	gatA	Glutamyl-tRNA(Gln) amidotransferase subunit A	ATP-binding;Completeproteome;Ligase;Nucleotide-binding;Proteinbiosynthesis;Referenceproteome	52.82	51	74.2	103560000000	1153	+	5.68223	0.606171	0	29.332	29.2982	29.2582	29.1847	28.6613	28.6679	28.6282	28.6909
Q2FWZ0	Q2FWZ0	gatB	Aspartyl/glutamyl-tRNA(Asn/Gln) amidotransferase subunit B	ATP-binding;Completeproteome;Ligase;Nucleotide-binding;Proteinbiosynthesis;Referenceproteome	53.656	82	95.4	106410000000	1846	+	5.21219	0.470201	0	28.7536	28.8343	28.8309	28.8703	28.2982	28.3525	28.3967	28.3609
Q2FWZ2	Q2FWZ2	dagK	Diacylglycerol kinase	ATP-binding;Completeproteome;Kinase;Lipidbiosynthesis;Lipidmetabolism;Magnesium;Metal-binding;Nucleotide-binding;Phospholipidbiosynthesis;Phospholipidmetabolism;Referenceproteome;Transferase	34.886	19	76.5	7154300000	216		0.328064	0.0534816	0.291808	26.3459	26.3448	26.4419	26.5892	26.268	26.4261	26.3768	26.437
Q2FWZ3	Q2FWZ3	SAOUHSC_02113		4Fe-4S;Completeproteome;Iron;Iron-sulfur;Metal-binding;Methyltransferase;Referenceproteome;S-adenosyl-L-methionine;Transferase	51.682	13	31.6	1038500000	105		0.623389	-0.112623	0.125496	22.7823	22.5169	22.4528	22.7171	22.7062	22.828	22.7187	22.6667
Q2FWZ5	Q2FWZ5	dinB	DNA polymerase IV	Completeproteome;Cytoplasm;DNA-binding;DNAdamage;DNA-directedDNApolymerase;DNArepair;DNAreplication;Magnesium;Metal-binding;Mutatorprotein;Nucleotidyltransferase;Referenceproteome;Transferase	39.049	3	13.9	2428400000	7		0.964097	-0.420401	0.0534893	25.9824	25.6085	25.8279	25.0162	26.064	25.8581	26.1954	25.999
Q2FWZ6	Q2FWZ6	SAOUHSC_02110		Completeproteome;Referenceproteome	21.12	5	38.6	195120000	34	+	4.06813	-1.53161	0.000471483	19.8039	20.141	19.7173	20.3223	21.4487	21.7158	21.3443	21.602
Q2FWZ8	Q2FWZ8	ftnA	Bacterial non-heme ferritin	Completeproteome;Cytoplasm;Directproteinsequencing;Iron;Ironstorage;Metal-binding;Oxidoreductase;Referenceproteome	19.588	20	52.4	120730000000	408	+	4.20776	0.929954	0.000290598	29.9669	29.7213	29.5617	29.8011	28.7084	28.8859	28.8596	28.8773
Q2FWZ9	Q2FWZ9	SAOUHSC_02107		Completeproteome;Referenceproteome	49.266	43	68.9	12760000000	585	+	3.1036	-0.260231	0.00063895	25.358	25.5299	25.5264	25.4725	25.7505	25.7036	25.7226	25.751
Q2FX00	Q2FX00	SAOUHSC_02106		Completeproteome;Referenceproteome	27.43	10	41.2	4005700000	190		0.79585	-0.116133	0.0800638	23.7424	23.9998	23.9677	23.9995	24.108	24.0513	24.0776	23.9371
Q2FX05	Q2FX05	map	Methionine aminopeptidase	Aminopeptidase;Completeproteome;Hydrolase;Metal-binding;Protease;Referenceproteome	27.502	16	59.1	5895600000	232	+	0.995433	0.177894	0.0493454	25.1418	25.0673	25.2144	25.3049	25.2325	24.9035	24.9423	24.9384
Q2FX07	Q2FX07	SAOUHSC_02100		Completeproteome;Referenceproteome	27.204	3	23.6	279680000	42		0.27612	-0.122084	0.344636	21.4167	21.8596	21.8403	21.6654	21.7925	22.1501	21.4221	21.9057
Q2FX08	Q2FX08	SAOUHSC_02099	Sensor protein VraS	ATP-binding;Cellmembrane;Completeproteome;Kinase;Membrane;Nucleotide-binding;Referenceproteome;Transferase;Two-componentregulatorysystem	40.044	11	33.4	552110000	61	+	1.59369	-0.597003	0.0122152	21.7569	21.2674	21.0031	21.2129	21.8222	22.277	21.7502	21.7789
Q2FX09	Q2FX09	SAOUHSC_02098		Completeproteome;DNA-binding;Referenceproteome;Transcription;Transcriptionregulation	23.545	17	77.5	5621400000	310	+	2.63433	-0.4199	0.00151186	24.005	24.0045	24.0972	24.1951	24.3793	24.3725	24.6363	24.5933
Q2FX10	Q2FX10	SAOUHSC_02097		Cellmembrane;Completeproteome;Membrane;Referenceproteome;Transmembrane;Transmembranehelix	45.604	7	18.8	437910000	46	+	1.7336	-0.883587	0.00892124	21.4299	21.4301	20.3272	21.1655	22.0236	21.9244	22.1792	21.7597
Q2FX11	Q2FX11	SAOUHSC_02096		Completeproteome;Referenceproteome	10.322	12	85.7	10394000000	215	+	1.15056	0.346144	0.032855	26.712	27.0708	27.2914	27.0323	26.7322	26.3851	26.7388	26.8658
Q2FX12	Q2FX12	ptpA	Low molecular weight protein-tyrosine-phosphatase PtpA	Completeproteome;Hydrolase;Proteinphosphatase;Referenceproteome	17.491	7	55.8	3296200000	78		0.190582	0.0393329	0.454249	25.1098	25.2892	25.2584	25.2916	25.0674	25.3771	25.1178	25.2293
Q2FX13	Q2FX13	SAOUHSC_02093	UPF0435 protein SAOUHSC_02093	Completeproteome;Referenceproteome	7.7886	6	77.9	2257900000	102		0.394583	-0.239395	0.239473	24.9881	24.4456	24.7075	23.8991	24.4206	24.7195	25.0552	24.8027
Q2FX14	Q2FX14	SAOUHSC_02092		Aminopeptidase;Completeproteome;Hydrolase;Protease;Referenceproteome	47.117	29	63.9	11884000000	495	+	3.99143	-0.530124	0.000438163	26.1142	26.132	26.1644	26.3223	26.7394	26.7074	26.6221	26.7844
Q2FX15	Q2FX15	SAOUHSC_02091		Completeproteome;Referenceproteome	19.992	7	75	798750000	61	+	1.22227	-0.429306	0.0281888	23.2888	23.0892	23.6659	23.438	23.3872	23.8624	23.9795	23.97
Q2FX16	Q2FX16	SAOUHSC_02090		Completeproteome;Referenceproteome	43.987	13	35.4	3405000000	195	+	2.78113	-0.488382	0.00113333	24.4647	24.7509	24.7304	24.8414	25.1044	25.2549	25.1289	25.2527
Q2FX17	Q2FX17	SAOUHSC_02089		Completeproteome;DNAintegration;DNArecombination;Referenceproteome	41.378	5	23	224860000	29	+	1.07048	-0.623396	0.0411688	20.533	21.2995	21.7315	20.9983	21.419	21.5604	22.1474	21.9291
Q2FX19	Q2FX19	SAOUHSC_02087		Completeproteome;Referenceproteome	35.632	17	61.1	6448400000	200		0.470546	-0.18529	0.191132	25.6999	26.1109	26.3256	26.2026	26.0293	26.1155	26.4576	26.4778
Q2FX20	Q2FX20	SAOUHSC_02086		Completeproteome;Referenceproteome	7.3002	4	78.7	752970000	44		0.302844	0.149633	0.318469	23.3176	23.5714	23.7999	23.1638	23.3035	22.9069	23.6412	23.4024
Q2FX21;Q2FY86	Q2FX21;Q2FY86	SAOUHSC_01578;SAOUHSC_02085		Completeproteome;Referenceproteome	6.3913	3	81.8	428860000	67		0.382404	0.14239	0.247306	22.8676	22.8964	22.6307	22.3979	22.791	22.7087	22.3665	22.3568
Q2FX22	Q2FX22	SAOUHSC_02084		Completeproteome;Referenceproteome	27.156	10	38.5	1909000000	92		0.908113	-0.191493	0.0618739	24.1647	24.0482	24.2193	24.0022	24.4514	24.3386	24.3848	24.0256
Q2FX25	Q2FX25	SAOUHSC_02080		Completeproteome;Referenceproteome	30.173	10	54.4	2447700000	59	+	6.12181	2.03161	0	26.8016	26.8342	26.6007	26.8407	24.8057	24.5112	24.8662	24.7677
Q2FX30	Q2FX30	SAOUHSC_02075		Completeproteome;Referenceproteome	13.352	3	38.5	130870000	36	+	4.35468	2.37021	0.00032381	23.1828	22.8927	23.0694	23.0951	20.9488	21.1258	20.1551	20.5295
Q2FX32	Q2FX32	SAOUHSC_02073		Completeproteome;Referenceproteome	20.647	2	24.7	108660000	9	+	4.1706	2.27315	0.000508197	21.8849	22.6682	22.8552	22.7066	20.3211	20.2476	20.0316	20.4219
Q2FX33	Q2FX33	SAOUHSC_02072		Completeproteome;Referenceproteome	29.442	5	37.5	273630000	33	+	6.00266	1.39102	0	22.6568	22.6656	22.4481	22.6706	21.2068	21.3079	21.2573	21.1051
Q2FX34	Q2FX34	SAOUHSC_02071		Completeproteome;DNA-binding;Referenceproteome	19.302	2	18.7	51017000	3		0.691544	0.543918	0.104873	21.0005	20.9531	20.8779	21.6392	20.4753	20.0211	20.2491	21.5496
Q2FX38	Q2FX38	SAOUHSC_02062		Completeproteome;Referenceproteome	10.042	1	18	35740000	6	+	1.37525	1.15735	0.0198716	21.36	21.5639	21.9969	21.4772	19.3816	21.2372	20.1256	21.0242
Q2FX39	Q2FX39	SAOUHSC_02061		Completeproteome;Referenceproteome	14.247	1	13.4	64266000	18	+	1.62401	1.00762	0.0110351	20.8697	21.2028	21.5884	21.7507	19.5669	20.4041	20.6389	20.7713
Q2FX42	Q2FX42	SAOUHSC_02058		Completeproteome;Referenceproteome	9.4454	1	16.2	63059000	15	+	3.05716	2.17701	0.000618644	22.0622	22.0518	22.1702	22.3423	19.5662	19.4635	19.8969	20.9919
Q2FX56	Q2FX56	SAOUHSC_02043		Completeproteome;Referenceproteome	36.77	13	37.7	896400000	71	+	1.39872	0.492068	0.0184535	23.2336	23.3231	22.9137	23.5905	22.5322	22.9963	22.5775	22.9865
Q2FX62	Q2FX62	SAOUHSC_02036		Completeproteome;Referenceproteome	21.513	9	63.2	526530000	52	+	3.6896	1.09024	0.000374622	22.1926	22.1274	21.9918	22.0412	20.6444	21.2563	21.0841	21.0072
Q2FX68	Q2FX68	SAOUHSC_02029		Completeproteome;Referenceproteome	73.649	12	26.9	569550000	23		0.27396	-0.131293	0.346873	23.3144	23.0671	23.6295	23.1824	23.717	23.213	23.6791	23.1094
Q2FX69	Q2FX69	SAOUHSC_02028		Completeproteome;Referenceproteome	66.986	7	27	875850000	17	+	1.47986	0.651634	0.015585	24.2682	24.2801	24.5349	24.6354	23.4033	23.656	23.6447	24.4081
Q2FX80	Q2FX80	SAOUHSC_02016		Completeproteome;Referenceproteome	7.6787	8	75.8	794430000	59		0.782928	0.247247	0.0830284	23.1585	23.4885	23.5883	23.3737	23.237	22.9071	23.4715	23.0045
Q2FX85	Q2FX85	SAOUHSC_01992		Completeproteome;Referenceproteome;Transferase	37.309	3	9.1	148730000	33	+	1.25788	-0.670625	0.025497	20.463	21.1802	21.4255	21.5209	21.6981	22.2012	21.8808	21.4921
Q2FX86	Q2FX86	SAOUHSC_01991		Cellmembrane;Completeproteome;Membrane;Referenceproteome;Transmembrane;Transmembranehelix;Transport	53.122	7	18.4	132620000	28	+	3.42974	-1.57473	0.000605128	20.2352	20.2849	20.1027	20.3978	21.2353	22.2273	21.8893	21.9677
Q2FX87	Q2FX87	SAOUHSC_01990		ATP-binding;Completeproteome;Nucleotide-binding;Referenceproteome	26.768	8	36	2917600000	16	+	1.72312	-0.654952	0.00916726	25.4018	26.1622	25.7947	25.6174	26.1486	26.3163	26.3766	26.7544
Q2FX88	Q2FX88	queG	Epoxyqueuosine reductase	4Fe-4S;Completeproteome;Cytoplasm;Iron;Iron-sulfur;Metal-binding;Oxidoreductase;Queuosinebiosynthesis;Referenceproteome;Repeat;tRNAprocessing	42.432	9	30	775170000	38		0.376671	0.285012	0.251935	22.5714	23.0179	23.2921	23.5634	22.3512	22.4618	23.0821	23.4096
Q2FX89	Q2FX89	SAOUHSC_01988	Putative tRNA (cytidine(34)-2'-O)-methyltransferase	Completeproteome;Cytoplasm;Methyltransferase;Referenceproteome;S-adenosyl-L-methionine;Transferase;tRNAprocessing	18.11	6	51.3	5446800000	132		0.559835	0.192326	0.149145	25.7882	26.2115	26.069	26.2588	25.6693	25.7075	26.0154	26.166
Q2FX90	Q2FX90	SAOUHSC_01987		Completeproteome;Referenceproteome	22.343	23	86.4	35266000000	531	+	3.54657	-0.472037	0.000497238	27.3926	27.4437	27.3158	27.2273	27.8705	27.9041	27.7493	27.7436
Q2FX94	Q2FX94	fumC	Fumarate hydratase class II	Completeproteome;Cytoplasm;Lyase;Referenceproteome;Tricarboxylicacidcycle	51.107	26	49.5	21775000000	473	+	5.48513	-1.03071	0	25.5295	25.5611	25.6464	25.6885	26.4872	26.6914	26.7085	26.6613
Q2FX95	Q2FX95	SAOUHSC_01982		Completeproteome;Lyase;Referenceproteome	31.44	19	61.9	7459500000	256	+	3.66472	-0.563681	0.000364706	24.5304	24.6665	24.6996	24.7599	25.2532	25.1229	25.3619	25.1732
Q2FX96	Q2FX96	SAOUHSC_01981		Completeproteome;Kinase;Referenceproteome;Transferase;Two-componentregulatorysystem	41.88	3	10	111320000	16		0.277983	0.181567	0.342952	21.2424	20.782	21.4179	21.4941	20.7311	21.5816	20.6587	21.2389
Q2FX97	Q2FX97	SAOUHSC_01980		Completeproteome;DNA-binding;Referenceproteome;Transcription;Transcriptionregulation	23.895	5	33.3	2213400000	26	+	2.09408	-0.528222	0.00427397	25.5175	25.3301	25.2547	25.0339	25.9931	25.7532	25.5821	25.9207
Q2FX98	Q2FX98	SAOUHSC_01979		Completeproteome;Referenceproteome	17.798	23	75.3	55539000000	514		0.299563	-0.0551353	0.321115	27.7867	27.892	28.0726	27.9184	27.8253	28.0052	28.0174	28.0423
Q2FX99	Q2FX99	SAOUHSC_01978	UPF0754 membrane protein SAOUHSC_01978	Cellmembrane;Completeproteome;Membrane;Referenceproteome;Transmembrane;Transmembranehelix	42.695	9	30.5	555650000	47	+	4.76367	1.17468	0	22.3444	22.2985	22.4584	22.3407	21.1114	21.0697	21.1117	21.4505
Q2FXA0	Q2FXA0	SAOUHSC_01977	UPF0342 protein SAOUHSC_01977	Completeproteome;Referenceproteome	13.31	19	99.1	144080000000	530	+	2.60538	-1.25539	0.00149164	30.2473	30.2525	30.0902	29.2116	31.3007	31.1306	31.1806	31.2112
Q2FXA3	Q2FXA3	hemE	Uroporphyrinogen decarboxylase	Completeproteome;Cytoplasm;Decarboxylase;Lyase;Porphyrinbiosynthesis;Referenceproteome	39.352	15	61.2	8513700000	234	+	2.09463	-0.509432	0.00427984	24.334	24.6186	24.6311	24.9425	25.2014	25.1556	25.0218	25.1852
Q2FXA4	Q2FXA4	hemH	Ferrochelatase	Completeproteome;Cytoplasm;Hemebiosynthesis;Iron;Lyase;Metal-binding;Porphyrinbiosynthesis;Referenceproteome	35.07	10	52.1	1941600000	207	+	2.79128	-0.613187	0.00113755	23.1714	23.5305	23.1043	23.4914	24.0217	23.9257	23.9233	23.8797
Q2FXA5	Q2FXA5	SAOUHSC_01960		Completeproteome;Oxidoreductase;Referenceproteome	51.983	34	69.3	12978000000	482	+	2.53147	-0.343878	0.00184262	25.0708	25.1269	25.2533	25.3781	25.5553	25.5997	25.5465	25.5031
Q2FXA7	Q2FXA7	SAOUHSC_01958		Completeproteome;Referenceproteome	21.442	7	58.2	2961200000	120	+	1.67979	-0.337801	0.0100974	24.0237	24.2046	24.3113	24.3079	24.3115	24.6142	24.5616	24.7114
Q2FXA8	Q2FXA8	SAOUHSC_01957		Completeproteome;Referenceproteome	30.759	6	30.9	1635900000	73		0.200784	-0.0674009	0.441332	24.5086	24.3709	24.4113	24.7537	24.5942	24.6782	24.7513	24.2904
Q2FXC3	Q2FXC3	splB	Serine protease SplB	3D-structure;Completeproteome;Directproteinsequencing;Hydrolase;Protease;Referenceproteome;Secreted;Serineprotease;Signal	26.096	3	28.3	58525000	8	+	2.31781	-1.53858	0.00261333	20.579	20.3488	19.9727	19.1308	21.8833	21.1514	21.4875	21.6636
Q2FXD0	Q2FXD0	SAOUHSC_01933		Completeproteome;Methyltransferase;Referenceproteome;Transferase	66.903	34	51.5	14128000000	462	+	6.85155	1.25135	0	27.1373	26.9879	27.0266	27.0331	25.7904	25.7595	25.885	25.7447
Q2FXD1	Q2FXD1	SAOUHSC_01932		Completeproteome;Referenceproteome	46.441	9	38.3	646860000	64	+	3.40838	0.820783	0.000600509	22.7662	22.6488	22.9662	22.5644	21.7693	22.0818	21.8057	22.0056
Q2FXE1	Q2FXE1	SAOUHSC_01922		Completeproteome;Referenceproteome	21.238	3	45.4	82079000	7		0.200309	0.205045	0.441641	20.0795	20.1405	21.3307	19.8388	20.5019	19.4762	20.2424	20.3488
Q2FXE2	Q2FXE2	SAOUHSC_01907		Completeproteome;Referenceproteome	31.471	24	93.5	10881000000	249	+	1.17113	0.123146	0.0317844	26.1291	26.1159	26.2618	26.3381	26.0623	26.0747	26.0909	26.1245
Q2FXE7	Q2FXE7	SAOUHSC_01902		Completeproteome;Referenceproteome	11.541	1	10	115770000	17		0.790383	-0.553777	0.0810794	20.4068	21.5601	20.7175	20.5197	21.7165	21.7294	21.1968	20.7764
Q2FXE8	Q2FXE8	SAOUHSC_01901	Transaldolase	Completeproteome;Cytoplasm;Pentoseshunt;Referenceproteome;Schiffbase;Transferase	25.705	41	89.5	42056000000	707	+	4.5818	-0.510004	0	26.9929	27.115	27.0745	26.9714	27.6127	27.4733	27.5464	27.5614
Q2FXF0	Q2FXF0	SAOUHSC_01899		Completeproteome;Referenceproteome	16.805	7	36.1	933580000	39	+	2.71231	0.515646	0.0013452	24.0037	24.3286	24.1209	24.1899	23.8362	23.5743	23.663	23.507
Q2FXF3	Q2FXF3	SAOUHSC_01896		Completeproteome;Referenceproteome	8.973	3	40.5	711800000	51	+	1.68663	-0.524758	0.0100653	23.2069	23.2071	23.2588	23.1256	23.4076	24.0879	23.9209	23.4811
Q2FXF4	Q2FXF4	SAOUHSC_01895		Completeproteome;Referenceproteome	32.506	20	58.8	2654600000	228		0.181021	-0.0398631	0.470386	24.1154	24.0962	23.8533	23.9058	24.0352	24.1862	23.9477	23.9611
Q2FXF5	Q2FXF5	arsC	Protein ArsC	Arsenicalresistance;Completeproteome;Disulfidebond;Hydrolase;Oxidoreductase;Redox-activecenter;Referenceproteome	14.686	8	81.7	742510000	53	+	2.08407	-0.487239	0.0042623	23.4239	23.1741	22.9814	22.9275	23.5015	23.7667	23.5638	23.6239
Q2FXF8	Q2FXF8	SAOUHSC_01890		Completeproteome;Referenceproteome	57.577	14	54.4	1159600000	120	+	1.23772	0.210088	0.0270663	22.7538	22.9359	22.9074	22.917	22.4599	22.8462	22.6859	22.6817
Q2FXF9	Q2FXF9	SAOUHSC_01889	Riboflavin biosynthesis protein RibD	Completeproteome;Hydrolase;Metal-binding;NADP;Oxidoreductase;Referenceproteome;Riboflavinbiosynthesis;Zinc	37.439	7	25.7	369620000	36		0.0296454	-0.0265384	0.871776	21.8481	21.9637	22.2949	22.3927	21.326	22.3035	22.4892	22.4868
Q2FXG0	Q2FXG0	SAOUHSC_01888		Completeproteome;Referenceproteome;Transferase	23.298	2	18.6	81598000	12	+	2.33937	0.39527	0.00257658	21.4854	21.108	21.3974	21.1774	20.8878	20.9277	20.8769	20.8947
Q2FXG1	Q2FXG1	ribBA	Riboflavin biosynthesis protein RibBA	Completeproteome;GTP-binding;Hydrolase;Lyase;Magnesium;Manganese;Metal-binding;Multifunctionalenzyme;Nucleotide-binding;Referenceproteome;Riboflavinbiosynthesis;Zinc	44.188	9	27	391160000	63		0.193595	-0.0945492	0.45023	21.3664	21.3881	21.7709	21.6147	21.2617	21.6171	21.571	22.0684
Q2FXG2	Q2FXG2	ribH	6.7-dimethyl-8-ribityllumazine synthase	Completeproteome;Referenceproteome;Riboflavinbiosynthesis;Transferase	16.396	17	90.3	9568800000	308	+	2.42834	-0.192719	0.00216013	25.3083	25.4007	25.4671	25.3398	25.5502	25.633	25.5781	25.5255
Q2FXG3	Q2FXG3	SAOUHSC_01884		Completeproteome;Referenceproteome	38.029	11	33.3	5697600000	161	+	4.11814	-1.09256	0.000488189	25.2132	25.6271	25.3495	25.4843	26.3489	26.6655	26.5949	26.435
Q2FXG5	Q2FXG5	SAOUHSC_01882		Completeproteome;Referenceproteome	31.865	20	59.3	5558800000	232	+	5.1089	0.94694	0	25.5213	25.7422	25.5456	25.7551	24.7322	24.6352	24.6735	24.7355
Q2FXH0	Q2FXH0	SAOUHSC_01877		Completeproteome;Referenceproteome	36.053	14	56.8	1547300000	95	+	5.91554	1.69696	0	23.9084	24.0032	24.2305	23.9585	22.1797	22.3725	22.3515	22.4089
Q2FXH2	Q2FXH2	leuS	Leucine--tRNA ligase	Aminoacyl-tRNAsynthetase;ATP-binding;Completeproteome;Cytoplasm;Ligase;Nucleotide-binding;Proteinbiosynthesis;Referenceproteome	91.785	52	58.9	35010000000	1069		0.428407	0.0682592	0.217275	27.3486	27.5995	27.5814	27.6365	27.4224	27.5423	27.4925	27.4358
Q2FXH3	Q2FXH3	SAOUHSC_01874		Completeproteome;Referenceproteome	11.344	7	68.9	1463800000	90		0.100285	0.0723586	0.638122	25.1303	24.5198	24.6365	23.9229	24.7436	24.3209	24.3914	24.4643
Q2FXH5	Q2FXH5	SAOUHSC_01872		Completeproteome;Referenceproteome	46.415	5	13.5	782800000	50	+	1.89485	0.29561	0.00633962	23.2337	23.0919	23.128	23.4342	22.882	22.9247	22.8739	23.0249
Q2FXH6	Q2FXH6	SAOUHSC_01871		Completeproteome;Referenceproteome	61.945	2	5.2	387130000	39		0.18739	0.0847144	0.4599	22.5776	22.9667	22.9534	23.1324	22.725	22.5223	22.894	23.1498
Q2FXH7	Q2FXH7	SAOUHSC_01870	Pseudouridine synthase	Completeproteome;Isomerase;Lyase;Referenceproteome;RNA-binding	26.615	8	48.9	300870000	46		0.579056	0.756964	0.141495	21.5812	21.6312	22.4723	20.9332	19.759	20.4532	21.1504	22.2273
Q2FXH8	Q2FXH8	SAOUHSC_01869		Completeproteome;Referenceproteome	15.733	20	78.6	5755200000	248	+	1.5236	-0.432915	0.0145755	24.6946	24.2344	24.3271	24.1517	25.0633	24.7154	24.6322	24.7286
Q2FXH9	Q2FXH9	SAOUHSC_01868	Putative dipeptidase SAOUHSC_01868	Completeproteome;Dipeptidase;Hydrolase;Metal-binding;Metalloprotease;Protease;Referenceproteome;Zinc	52.824	42	65.2	33707000000	817	+	3.06361	0.244582	0.000622601	27.1	27.2074	27.2211	27.2867	26.9646	26.9833	26.937	26.9522
Q2FXI0	Q2FXI0	SAOUHSC_01867	D-alanine aminotransferase	Aminotransferase;Completeproteome;Pyridoxalphosphate;Referenceproteome;Transferase	31.893	36	97.2	29671000000	736		0.69108	-0.0544949	0.104869	26.4866	26.5194	26.4932	26.4094	26.4521	26.5709	26.5193	26.5843
Q2FXI1	Q2FXI1	SAOUHSC_01866		Completeproteome;Referenceproteome	28.388	3	17.8	129590000	21	+	2.08208	-1.16998	0.00425648	20.2803	20.1163	21.4003	20.6974	21.7068	21.6178	21.7822	22.0674
Q2FXI2	Q2FXI2	trmB	tRNA (guanine-N(7)-)-methyltransferase	Completeproteome;Methyltransferase;Referenceproteome;S-adenosyl-L-methionine;Transferase;tRNAprocessing	25.275	11	61.2	1720500000	154		0.152286	-0.0366392	0.523292	22.9429	23.2152	23.2754	23.3484	23.2425	23.174	23.2947	23.2172
Q2FXI3	Q2FXI3	SAOUHSC_01864		Completeproteome;Referenceproteome	32.189	5	30.7	178390000	40		0.243749	0.0936823	0.381902	21.5281	20.807	21.0686	21.0547	21.0479	21.1101	21.0167	20.9089
Q2FXI4	Q2FXI4	SAOUHSC_01863		Completeproteome;Referenceproteome	11.967	7	68.9	943700000	83		0.820354	0.246424	0.0759932	22.8943	23.4065	23.234	23.5017	23.2052	22.9938	22.9632	22.8886
Q2FXI5	Q2FXI5	SAOUHSC_01861		Completeproteome;Referenceproteome	39.783	19	67.9	15496000000	407	+	2.97925	0.412159	0.000708758	27.1229	27.401	27.1944	27.3589	26.7956	26.8836	26.8528	26.8965
Q2FXI6	Q2FXI6	SAOUHSC_01860		Completeproteome;Referenceproteome	11.855	6	51.5	7114800000	92		0.522822	0.0996242	0.163678	26.8667	27.2253	26.9277	26.8588	26.8271	26.8741	26.8896	26.8891
Q2FXI7	Q2FXI7	SAOUHSC_01859	UPF0354 protein SAOUHSC_01859	Completeproteome;Referenceproteome	33.069	20	58.6	3504400000	233	+	2.98289	0.640055	0.000711656	24.9963	24.7742	24.7728	24.7802	24.3828	24.2816	24.1469	23.9521
Q2FXI8	Q2FXI8	SAOUHSC_01858		Completeproteome;Referenceproteome;RNA-binding;tRNA-binding	21.69	19	59.1	14231000000	268	+	4.09135	0.471388	0.00048062	27.1242	27.1369	27.1708	27.009	26.6849	26.5705	26.7138	26.5862
Q2FXI9	Q2FXI9	SAOUHSC_01857		ATP-binding;Completeproteome;DNA-binding;Nucleotide-binding;Referenceproteome	144.65	54	48	13009000000	679	+	3.38903	0.394177	0.000594458	25.7389	25.8909	25.9029	25.9155	25.4148	25.5708	25.4084	25.4775
Q2FXJ0	Q2FXJ0	murC	UDP-N-acetylmuramate--L-alanine ligase	ATP-binding;Cellcycle;Celldivision;Cellshape;Cellwallbiogenesis/degradation;Completeproteome;Cytoplasm;Ligase;Nucleotide-binding;Peptidoglycansynthesis;Referenceproteome	49.188	22	55.1	11973000000	397	+	2.38424	0.304417	0.00256049	26.0051	26.1832	25.9309	25.9581	25.6706	25.8052	25.7431	25.6407
Q2FXJ2	Q2FXJ2	isdH	Iron-regulated surface determinant protein H	Cellwall;Completeproteome;Peptidoglycan-anchor;Referenceproteome;Repeat;Secreted;Signal	100.95	5	6.5	2162500000	57	+	0.994858	-0.350996	0.0494549	24.4964	24.8416	24.8144	25.1846	25.3722	24.9361	25.3877	25.045
Q2FXJ4	Q2FXJ4	SAOUHSC_01840		Cellshape;Cellwallbiogenesis/degradation;Completeproteome;Membrane;Peptidoglycansynthesis;Referenceproteome;Transferase;Transmembrane;Transmembranehelix	34.526	5	36.9	1107000000	11		0.0291841	-0.0216174	0.873564	24.957	24.0826	23.8435	24.3244	24.4327	24.252	24.1174	24.4918
Q2FXJ5	Q2FXJ5	tyrS	Tyrosine--tRNA ligase	Aminoacyl-tRNAsynthetase;ATP-binding;Completeproteome;Cytoplasm;Ligase;Nucleotide-binding;Proteinbiosynthesis;Referenceproteome;RNA-binding	47.597	36	75	24433000000	671		0.194508	0.0534234	0.449228	26.4565	26.7091	26.5631	26.9403	26.6483	26.5495	26.668	26.5895
Q2FXJ6	Q2FXJ6	SAOUHSC_01838		Completeproteome;Referenceproteome	45.802	32	76.2	19134000000	519	+	2.58132	-0.25422	0.00159468	26.3427	26.4221	26.4116	26.427	26.7745	26.6776	26.5496	26.6185
Q2FXJ7	Q2FXJ7	SAOUHSC_01837		Acyltransferase;Completeproteome;Referenceproteome;Transferase	23.074	15	55.6	5872000000	232	+	3.10694	-0.649265	0.000641758	24.2895	24.452	24.5422	24.7461	25.0746	25.2715	25.1567	25.1241
Q2FXJ8	Q2FXJ8	SAOUHSC_01836		Cellmembrane;Completeproteome;Kinase;Membrane;Phosphotransferasesystem;Referenceproteome;Sugartransport;Transferase;Transmembrane;Transmembranehelix;Transport	53.114	8	22.7	615450000	26		0.165449	-0.148742	0.498139	23.0234	23.0687	23.4686	23.1914	23.7759	23.8108	22.3847	23.3757
Q2FXK1	Q2FXK1	SAOUHSC_01833		Completeproteome;Oxidoreductase;Referenceproteome	57.618	17	38.8	812530000	122		0.972306	0.209191	0.0525049	22.2181	22.2513	22.3211	22.3805	21.8	22.0593	22.2669	22.208
Q2FXK2	Q2FXK2	SAOUHSC_01832		Completeproteome;Pyridoxalphosphate;Referenceproteome	42.85	5	19.9	132040000	18	+	3.28225	0.521528	0.000556604	21.6116	21.5487	21.7702	21.831	21.2283	21.0941	21.2482	21.1048
Q2FXK3	Q2FXK3	SAOUHSC_01831		Completeproteome;Referenceproteome	16.07	4	25	302960000	26		0.182786	-0.212174	0.467382	20.6259	22.1384	22.7569	22.066	22.167	22.1995	21.9869	22.0824
Q2FXK4	Q2FXK4	SAOUHSC_01830		Completeproteome;Referenceproteome	28.405	4	20.2	499790000	28	+	2.29981	-0.576901	0.00267059	22.9606	22.843	22.9756	22.9017	23.3639	23.3457	23.392	23.8868
Q2FXK6	Q2FXK6	rpsD	30S ribosomal protein S4	Completeproteome;Referenceproteome;Ribonucleoprotein;Ribosomalprotein;RNA-binding;rRNA-binding	23.013	36	95.5	133580000000	1002	+	3.91957	-0.321398	0.000417508	29.5851	29.6711	29.6382	29.7208	29.9214	29.9896	29.9602	30.0297
Q2FXK7	Q2FXK7	SAOUHSC_01828		Completeproteome;Referenceproteome	17.11	2	8.4	2249300000	31		0.885479	0.16075	0.0652812	25.0306	25.1359	25.3417	25.1015	24.8364	24.949	25.1209	25.0606
Q2FXK8	Q2FXK8	ezrA	Septation ring formation regulator EzrA	Cellcycle;Celldivision;Cellmembrane;Coiledcoil;Completeproteome;Membrane;Referenceproteome;Septation;Transmembrane;Transmembranehelix	66.246	53	75.9	30745000000	827		0.594532	0.0817695	0.136028	27.3673	27.3913	27.2242	27.4464	27.377	27.3193	27.2232	27.1825
Q2FXL0	Q2FXL0	SAOUHSC_01825		Completeproteome;Pyridoxalphosphate;Referenceproteome	42.365	13	38.7	635770000	60	+	3.62598	1.3407	0.000523256	23.7456	23.8505	23.9104	23.9714	22.4232	22.1529	22.5966	22.9425
Q2FXL1	Q2FXL1	thiI	Probable tRNA sulfurtransferase	ATP-binding;Completeproteome;Cytoplasm;Nucleotide-binding;Referenceproteome;RNA-binding;Thiaminebiosynthesis;Transferase;tRNA-binding	46.209	33	72.5	5051300000	321	+	2.43598	0.587415	0.00208202	24.5916	25.121	25.0739	25.086	24.4206	24.3645	24.4057	24.332
Q2FXL3	Q2FXL3	tpx	Probable thiol peroxidase	3D-structure;Antioxidant;Completeproteome;Oxidoreductase;Peroxidase;Referenceproteome	18.005	18	89	34805000000	409		0.320803	0.0615187	0.299773	27.4621	27.4097	27.4223	27.2042	27.4531	27.3353	27.2856	27.1782
Q2FXL4	Q2FXL4	SAOUHSC_01821		Completeproteome;Referenceproteome	35.947	28	63.8	7518600000	322	+	3.60444	0.401173	0.000512821	25.0467	25.1801	25.1127	25.0226	24.7114	24.7087	24.5801	24.7572
Q2FXL5	Q2FXL5	ackA	Acetate kinase	ATP-binding;Completeproteome;Cytoplasm;Kinase;Magnesium;Metal-binding;Nucleotide-binding;Referenceproteome;Transferase	44.042	59	99.8	107310000000	1315		0.365016	0.0545144	0.260754	28.6286	28.8734	28.8385	28.7699	28.6229	28.7768	28.7687	28.724
Q2FXL6	Q2FXL6	SAOUHSC_01819	Putative universal stress protein SAOUHSC_01819	Completeproteome;Cytoplasm;Referenceproteome	18.475	30	100	225420000000	1199	+	3.12181	0.396951	0.00064745	31.1837	30.9934	31.2405	31.1431	30.6636	30.7539	30.8303	30.7251
Q2FXL7	Q2FXL7	ald2	Alanine dehydrogenase 2	Completeproteome;NAD;Oxidoreductase;Referenceproteome	40.105	38	77.2	11298000000	464	+	6.29029	-1.50042	0	24.4629	24.6595	24.5963	24.7386	26.1128	26.2028	26.0448	26.0988
Q2FXL9	Q2FXL9	SAOUHSC_01816	Uncharacterized peptidase SAOUHSC_01816	Completeproteome;Hydrolase;Manganese;Metal-binding;Referenceproteome	39.553	21	58.7	8820100000	338		0.957637	0.164569	0.0541621	26.3276	26.3622	26.0241	26.2376	26.1319	26.1205	26.0987	25.9422
Q2FXM0	Q2FXM0	SAOUHSC_01815	UPF0173 metal-dependent hydrolase SAOUHSC_01815	Completeproteome;Hydrolase;Referenceproteome	25.25	12	71.6	38058000000	248	+	1.24043	0.244685	0.0268385	29.4296	29.6085	29.3808	29.1461	29.2133	29.0653	29.2268	29.0809
Q2FXM1	Q2FXM1	SAOUHSC_01814		Completeproteome;Referenceproteome	15.226	28	93.4	63408000000	693	+	3.22282	0.518962	0.000547564	28.2925	28.422	28.5137	28.5847	28.0311	27.9995	27.8377	27.8688
Q2FXM2	Q2FXM2	SAOUHSC_01813		Completeproteome;Referenceproteome	48.53	13	39.4	1068700000	128	+	3.50379	0.70338	0.000483871	23.2587	23.6251	23.4823	23.4007	22.741	22.814	22.5783	22.82
Q2FXM3	Q2FXM3	SAOUHSC_01812		Completeproteome;Referenceproteome	35.096	16	59.1	8997300000	217	+	2.02275	0.338031	0.00483511	26.6457	26.6828	26.5179	26.8385	26.4745	26.3446	26.175	26.3388
Q2FXM5	Q2FXM5	SAOUHSC_01810		Completeproteome;Metal-binding;Oxidoreductase;Referenceproteome	44.233	41	80.2	72230000000	814	+	4.5933	0.582703	0	28.2958	28.4375	28.2273	28.338	27.6897	27.8094	27.7363	27.7325
Q2FXM6	Q2FXM6	accD	Acetyl-coenzyme A carboxylase carboxyl transferase subunit beta	ATP-binding;Completeproteome;Cytoplasm;Fattyacidbiosynthesis;Fattyacidmetabolism;Ligase;Lipidbiosynthesis;Lipidmetabolism;Metal-binding;Nucleotide-binding;Referenceproteome;Zinc;Zinc-finger	31.871	30	85.3	13189000000	458	+	3.58157	0.596794	0.000507042	26.1807	26.1082	26.216	26.0634	25.3485	25.5466	25.6198	25.6661
Q2FXM7	Q2FXM7	accA	Acetyl-coenzyme A carboxylase carboxyl transferase subunit alpha	ATP-binding;Completeproteome;Cytoplasm;Fattyacidbiosynthesis;Fattyacidmetabolism;Ligase;Lipidbiosynthesis;Lipidmetabolism;Nucleotide-binding;Referenceproteome	35.07	22	79.3	12487000000	352	+	4.36779	0.705699	0.000330097	26.3258	26.5905	26.4117	26.5374	25.7725	25.8397	25.7208	25.7096
Q2FXM8	Q2FXM8	pfkA	ATP-dependent 6-phosphofructokinase	Allostericenzyme;ATP-binding;Completeproteome;Cytoplasm;Glycolysis;Kinase;Magnesium;Metal-binding;Nucleotide-binding;Referenceproteome;Transferase	34.839	25	64.3	44355000000	507	+	4.99165	0.541882	0	28.2662	28.3575	28.4269	28.3847	27.7676	27.837	27.7988	27.8644
Q2FXM9	Q2FXM9	pyk	Pyruvate kinase	ATP-binding;Completeproteome;Glycolysis;Kinase;Magnesium;Metal-binding;Nucleotide-binding;Potassium;Pyruvate;Referenceproteome;Transferase	63.102	72	93	180110000000	1643	+	4.93856	0.382427	0	29.4273	29.4634	29.4179	29.4794	29.1232	29.0161	29.031	29.088
Q2FXN2	Q2FXN2	SAOUHSC_01803		Completeproteome;Membrane;Referenceproteome;Transmembrane	50.48	1	3.8	369450000	29	+	2.64951	-0.547626	0.00152479	22.2742	22.3189	22.1831	22.3628	22.8656	22.7173	23.1007	22.6459
Q2FXN3	Q2FXN3	SAOUHSC_01802		Completeproteome;Referenceproteome;Transferase	32.392	11	43.5	5157200000	150	+	1.77153	-0.745023	0.0081494	24.6059	25.132	25.5008	25.3438	25.7121	25.7532	26.2266	25.8707
Q2FXN4	Q2FXN4	SAOUHSC_01801	Isocitrate dehydrogenase [NADP]	Completeproteome;Glyoxylatebypass;Manganese;Metal-binding;NADP;Oxidoreductase;Referenceproteome;Tricarboxylicacidcycle	46.422	27	42.7	27504000000	431	+	5.41424	-0.833664	0	26.5124	26.6925	26.5509	26.614	27.3524	27.4183	27.5186	27.4151
Q2FXN6	Q2FXN6	SAOUHSC_01800		Completeproteome;DNA-binding;Phosphoprotein;Referenceproteome;Transcription;Transcriptionregulation	27.122	11	46.6	1585900000	140	+	3.53092	0.901266	0.000493151	24.1389	24.0152	23.8735	23.9903	22.9582	23.0658	22.9714	23.4175
Q2FXN7	Q2FXN7	SAOUHSC_01799	Histidine kinase	ATP-binding;Completeproteome;Kinase;Membrane;Nucleotide-binding;Phosphoprotein;Referenceproteome;Transferase;Transmembrane;Transmembranehelix	63.773	8	25.7	279980000	26		0.190909	-0.163471	0.454134	21.5856	21.8522	22.2784	21.7317	22.9268	21.7041	21.6735	21.7973
Q2FXN9	Q2FXN9	SAOUHSC_01797	DNA polymerase	Completeproteome;DNA-binding;DNAreplication;Hydrolase;Nuclease;Nucleotidyltransferase;Referenceproteome;Transferase	99.194	69	72.3	20466000000	1012	+	3.85992	0.604846	0.000405229	25.1399	25.3242	25.3426	25.4375	24.6974	24.6171	24.7696	24.7407
Q2FXP0	Q2FXP0	SAOUHSC_01796		Completeproteome;DNA-binding;DNAdamage;DNArepair;Glycosidase;Hydrolase;Lyase;Metal-binding;Multifunctionalenzyme;Referenceproteome;Zinc;Zinc-finger	33.411	5	22.1	75622000	13		0.320279	-0.203275	0.300108	20.7235	20.3127	20.2104	19.9831	20.6029	20.9695	20.5588	19.9117
Q2FXP1	Q2FXP1	coaE	Dephospho-CoA kinase	ATP-binding;CoenzymeAbiosynthesis;Completeproteome;Cytoplasm;Kinase;Nucleotide-binding;Referenceproteome;Transferase	23.592	22	75.8	12470000000	353	+	1.54508	0.12385	0.0137919	25.3213	25.3092	25.3245	25.2634	25.1769	25.1807	25.0829	25.2827
Q2FXP2	Q2FXP2	SAOUHSC_01794	Glyceraldehyde-3-phosphate dehydrogenase	Completeproteome;Oxidoreductase;Referenceproteome	36.979	23	52.2	7672100000	228	+	4.33269	-1.75552	0.000314815	24.6963	24.6594	24.5795	24.8407	26.1529	26.4599	26.8905	26.2945
Q2FXP3	Q2FXP3	nrdR	Transcriptional repressor NrdR	ATP-binding;Completeproteome;DNA-binding;Metal-binding;Nucleotide-binding;Referenceproteome;Repressor;Transcription;Transcriptionregulation;Zinc;Zinc-finger	18.203	7	47.4	2299600000	106	+	1.4824	0.315761	0.0155498	24.8751	24.4949	24.4803	24.7226	24.3164	24.4863	24.1749	24.3322
Q2FXP4	Q2FXP4	SAOUHSC_01792		Completeproteome;Referenceproteome	54.532	7	24.9	814860000	92		0.871935	0.29707	0.0674651	23.1979	23.1048	23.3766	23.3665	22.8723	22.6793	22.8886	23.4175
Q2FXP5	Q2FXP5	SAOUHSC_01791		Completeproteome;Referenceproteome	35.635	16	57.8	4150000000	284		0.507661	0.126337	0.171138	23.8707	23.8789	24.3168	24.1713	23.9711	23.8541	23.9736	23.9336
Q2FXP7	Q2FXP7	thrS	Threonine--tRNA ligase	Aminoacyl-tRNAsynthetase;ATP-binding;Completeproteome;Cytoplasm;Ligase;Metal-binding;Nucleotide-binding;Proteinbiosynthesis;Referenceproteome;Zinc	74.487	60	77.2	78107000000	1208		0.976426	-0.111483	0.0521112	27.4227	27.5764	27.6153	27.6572	27.6455	27.6743	27.6364	27.7614
Q2FXP9	Q2FXP9	infC	Translation initiation factor IF-3	Completeproteome;Cytoplasm;Initiationfactor;Proteinbiosynthesis;Referenceproteome	20.213	27	80	63923000000	662		0.776813	-0.148327	0.0846789	27.8666	28.0366	28.1872	28.1465	28.1097	28.1017	28.2658	28.353
Q2FXQ0	Q2FXQ0	rpmI	50S ribosomal protein L35	Completeproteome;Referenceproteome;Ribonucleoprotein;Ribosomalprotein	7.6972	11	65.2	67988000000	357		0.380224	-0.178694	0.248955	27.4907	28.0167	28.1957	28.2727	28.1046	28.143	27.9752	28.4677
Q2FXQ1	Q2FXQ1	rplT	50S ribosomal protein L20	Completeproteome;Referenceproteome;Ribonucleoprotein;Ribosomalprotein;RNA-binding;rRNA-binding	13.686	34	92.4	143180000000	773		0.559302	-0.103919	0.149245	29.8629	30.1094	30.2371	30.0615	30.0839	30.1905	30.1454	30.2667
Q2FXQ3	Q2FXQ3	SAOUHSC_01782		Completeproteome;Referenceproteome	22.946	14	79.7	14968000000	251	+	2.57525	0.332333	0.00167828	26.9576	26.9298	26.7703	26.9395	26.6287	26.4281	26.6608	26.5502
Q2FXQ4	Q2FXQ4	SAOUHSC_01781		Completeproteome;Referenceproteome	36.431	5	18.1	629320000	40		0.658239	0.308547	0.113737	22.5975	22.8218	22.6995	23.2523	22.1125	22.4648	22.9476	22.6119
Q2FXQ6	Q2FXQ6	tig	Trigger factor	Cellcycle;Celldivision;Chaperone;Completeproteome;Cytoplasm;Isomerase;Referenceproteome;Rotamase	48.608	51	71.4	231880000000	1419	+	4.53611	0.454922	0	29.9858	30.0788	30.0482	30.099	29.6361	29.6563	29.5129	29.5867
Q2FXQ7	Q2FXQ7	clpX	ATP-dependent Clp protease ATP-binding subunit ClpX	ATP-binding;Chaperone;Completeproteome;Metal-binding;Nucleotide-binding;Referenceproteome;Zinc;Zinc-finger	46.297	33	76.9	48270000000	870		0.747807	-0.0768123	0.090379	27.2186	27.2658	27.3031	27.3151	27.2341	27.456	27.3644	27.3554
Q2FXQ8	Q2FXQ8	engB	Probable GTP-binding protein EngB	Cellcycle;Celldivision;Completeproteome;GTP-binding;Magnesium;Metal-binding;Nucleotide-binding;Referenceproteome;Septation	22.685	15	68.4	7126700000	192		0.810556	0.185076	0.0773828	26.1705	26.3494	26.2889	26.2322	26.1053	26.3666	25.9118	25.917
Q2FXQ9	Q2FXQ9	hemA	Glutamyl-tRNA reductase	Completeproteome;NADP;Oxidoreductase;Porphyrinbiosynthesis;Referenceproteome	50.159	3	10.7	110120000	12	+	1.0234	0.417277	0.0457936	21.8656	21.803	21.6026	21.4241	21.382	21.7237	20.9865	20.9339
Q2FXR2	Q2FXR2	SAOUHSC_01773		Completeproteome;Lyase;Referenceproteome	25.418	3	10.4	342350000	30	+	1.13866	0.441196	0.0339486	22.0312	22.5062	22.1316	22.7684	21.6167	21.9058	22.0218	22.1282
Q2FXR3	Q2FXR3	hemB	Delta-aminolevulinic acid dehydratase	Completeproteome;Hemebiosynthesis;Lyase;Magnesium;Metal-binding;Porphyrinbiosynthesis;Referenceproteome;Zinc	36.582	24	64.5	28964000000	503		0.183318	0.0372729	0.46689	26.8755	27.0787	27.104	27.249	26.9922	27.0904	27.0325	27.0429
Q2FXR4	Q2FXR4	hemL1	Glutamate-1-semialdehyde 2.1-aminomutase 1	Completeproteome;Cytoplasm;Isomerase;Porphyrinbiosynthesis;Pyridoxalphosphate;Referenceproteome	46.388	33	56.3	23267000000	683		0.624206	-0.114968	0.125312	26.8716	27.1041	27.0484	27.1638	27.1522	27.2951	27.0026	27.198
Q2FXR7	Q2FXR7	SAOUHSC_01768		Completeproteome;Referenceproteome	21.416	3	28.5	205230000	17		0.525474	-0.423825	0.16273	22.7079	22.021	22.2074	21.0444	22.2079	22.7385	22.526	22.2036
Q2FXR8	Q2FXR8	valS	Valine--tRNA ligase	Aminoacyl-tRNAsynthetase;ATP-binding;Coiledcoil;Completeproteome;Cytoplasm;Ligase;Nucleotide-binding;Proteinbiosynthesis;Referenceproteome	101.72	81	72.8	37231000000	1213	+	1.41828	-0.13218	0.0178655	26.1428	26.1804	26.2667	26.2231	26.2361	26.2953	26.397	26.4133
Q2FXR9	Q2FXR9	SAOUHSC_01766		ATP-binding;Completeproteome;Ligase;Nucleotide-binding;Referenceproteome	47.856	18	43.3	4707400000	239	+	2.76838	-0.460923	0.00112707	24.1345	24.4422	24.4187	24.5026	24.8219	24.8161	24.7943	24.9094
Q2FXS4	Q2FXS4	SAOUHSC_01761		Completeproteome;Referenceproteome	18.385	6	57.3	252830000	38		0.646597	-0.356524	0.117394	21.5385	21.1721	21.9749	21.4544	21.3215	22.2979	21.9994	21.9471
Q2FXS6	Q2FXS6	SAOUHSC_01759	Cell shape-determining protein MreC	Cellshape;Completeproteome;Referenceproteome	31.01	23	72.9	3379800000	329	+	1.17539	-0.17854	0.0313211	23.6871	23.9532	24.0282	23.8301	24.0963	24.0198	24.1059	23.9908
Q2FXS8	Q2FXS8	rplU	50S ribosomal protein L21	Completeproteome;Referenceproteome;Ribonucleoprotein;Ribosomalprotein;RNA-binding;rRNA-binding	11.333	19	85.3	87750000000	404	+	3.53886	-0.369962	0.000494505	29.1228	29.2088	29.3281	29.2486	29.5486	29.5694	29.6099	29.6602
Q2FXT0	Q2FXT0	rpmA	50S ribosomal protein L27	Completeproteome;Referenceproteome;Ribonucleoprotein;Ribosomalprotein	10.315	19	68.1	101390000000	495	+	1.97484	-0.318231	0.00573664	29.4297	29.4615	29.7064	29.672	29.7387	29.9023	29.9509	29.9506
Q2FXT1	Q2FXT1	obg	GTPase Obg	Completeproteome;Cytoplasm;GTP-binding;Nucleotide-binding;Referenceproteome	47.235	37	77.9	23795000000	630	+	2.47474	-0.306435	0.00203195	26.937	27.1891	27.0376	27.1934	27.3867	27.4491	27.3566	27.3905
Q2FXT2	Q2FXT2	SAOUHSC_01752	UPF0735 ACT domain-containing protein SAOUHSC_01752	Completeproteome;Referenceproteome	17.343	4	43.7	127800000	11	+	1.29954	-0.501375	0.0234612	21.1156	21.2269	21.5371	20.6812	21.7653	21.7984	21.3443	21.6584
Q2FXT3	Q2FXT3	ruvA	Holliday junction ATP-dependent DNA helicase RuvA	ATP-binding;Completeproteome;DNA-binding;DNAdamage;DNArecombination;DNArepair;Helicase;Hydrolase;Nucleotide-binding;Referenceproteome;SOSresponse	22.262	17	64.5	5840800000	175		0.658088	0.111971	0.113777	25.2341	25.3746	25.2876	25.0518	25.0175	25.124	25.2381	25.1206
Q2FXT4	Q2FXT4	ruvB	Holliday junction ATP-dependent DNA helicase RuvB	ATP-binding;Completeproteome;DNAdamage;DNArecombination;DNArepair;Helicase;Hydrolase;Nucleotide-binding;Referenceproteome;SOSresponse	37.718	20	70.4	2977400000	210		0.79479	0.152498	0.0801811	23.7853	23.7243	23.8874	23.8984	23.4443	23.6709	23.713	23.8572
Q2FXT5	Q2FXT5	queA	S-adenosylmethionine:tRNA ribosyltransferase-isomerase	Completeproteome;Cytoplasm;Queuosinebiosynthesis;Referenceproteome;S-adenosyl-L-methionine;Transferase	38.968	16	54.8	3579700000	169		0.0922879	-0.0227089	0.658662	24.4827	24.8005	24.865	24.7225	24.6556	24.7649	24.7311	24.81
Q2FXT6	Q2FXT6	tgt	Queuine tRNA-ribosyltransferase	Completeproteome;Glycosyltransferase;Metal-binding;Queuosinebiosynthesis;Referenceproteome;Transferase;tRNAprocessing;Zinc	43.309	20	50.4	12295000000	375	+	1.26129	-0.257159	0.02542	25.0038	25.1658	25.2118	25.3647	25.2481	25.3908	25.6001	25.5357
Q2FXT7	Q2FXT7	SAOUHSC_01747		Completeproteome;Referenceproteome	9.6713	8	68.6	22454000000	230	+	2.39317	-0.345783	0.00257231	27.1107	27.0968	27.2965	27.1388	27.5454	27.4814	27.3535	27.6456
Q2FXT8	Q2FXT8	SAOUHSC_01746		Cellmembrane;Completeproteome;Membrane;Proteintransport;Referenceproteome;Translocation;Transmembrane;Transmembranehelix;Transport	82.051	42	41.1	15209000000	583	+	3.67049	-0.553676	0.000367953	25.4931	25.61	25.7758	25.7433	26.2368	26.2661	26.1799	26.1541
Q2FXT9	Q2FXT9	SAOUHSC_01744		Completeproteome;Referenceproteome	85.61	41	49	12183000000	531	+	6.95676	1.97046	0	26.5708	26.8114	26.5968	26.7862	24.6561	24.7696	24.6999	24.7578
Q2FXU0	Q2FXU0	apt	Adenine phosphoribosyltransferase	Completeproteome;Cytoplasm;Glycosyltransferase;Purinesalvage;Referenceproteome;Transferase	19.117	12	85.5	2679900000	136	+	2.32433	0.578124	0.00255738	25.7128	25.3485	25.7376	25.5811	25.1065	24.7535	24.9973	25.2103
Q2FXU1	Q2FXU1	SAOUHSC_01742		Completeproteome;Kinase;Referenceproteome;Transferase	83.693	32	45.8	4467900000	343	+	1.61735	-0.145308	0.0112723	23.911	23.8615	23.9304	24.0646	24.0993	24.0323	24.0808	24.1364
Q2FXU2	Q2FXU2	dtd	D-aminoacyl-tRNA deacylase	Completeproteome;Cytoplasm;Hydrolase;Referenceproteome	16.697	8	54	1427600000	112	+	3.32458	-0.581657	0.000577017	22.9846	22.9199	22.7893	22.9792	23.5427	23.5692	23.2879	23.5999
Q2FXU3	Q2FXU3	lytH	Probable cell wall amidase LytH	Cellwallbiogenesis/degradation;Completeproteome;Hydrolase;Referenceproteome;Secreted;Signal	32.694	10	38.1	710960000	95	+	2.2141	-0.463418	0.00339548	22.1855	22.5956	22.5626	22.5597	22.7825	22.9356	23.0207	23.0183
Q2FXU4	Q2FXU4	hisS	Histidine--tRNA ligase	Aminoacyl-tRNAsynthetase;ATP-binding;Completeproteome;Cytoplasm;Ligase;Nucleotide-binding;Proteinbiosynthesis;Referenceproteome	48.282	25	52.6	11043000000	315	+	2.67428	-0.388756	0.00140522	25.4671	25.4164	25.2742	25.2766	25.6283	25.8329	25.8574	25.6708
Q2FXU5	Q2FXU5	aspS	Aspartate--tRNA ligase	Aminoacyl-tRNAsynthetase;ATP-binding;Completeproteome;Cytoplasm;Ligase;Nucleotide-binding;Proteinbiosynthesis;Referenceproteome	66.628	48	75.7	27613000000	971	+	5.57861	-0.473104	0	25.5133	25.4004	25.4236	25.4379	25.8887	25.9327	25.9455	25.9007
Q2FXU7	Q2FXU7	SAOUHSC_01735		Completeproteome;Referenceproteome	28.641	14	51.8	2419000000	180		0.867218	-0.260942	0.067938	23.5397	23.6749	23.8143	23.9664	23.7349	24.0299	24.319	23.9552
Q2FXU8	Q2FXU8	SAOUHSC_01734		Completeproteome;Referenceproteome	46.277	26	70.8	3098500000	228		0.249649	0.0635257	0.374966	22.8337	23.1119	23.1404	23.3019	23.0238	22.9464	23.0403	23.1231
Q2FXV0	Q2FXV0	SAOUHSC_01732		Completeproteome;Referenceproteome	12.768	7	59.5	6894300000	167	+	1.65872	0.437141	0.0106023	25.5127	25.9497	25.9625	26.1091	25.3092	25.601	25.411	25.4643
Q2FXV1	Q2FXV1	SAOUHSC_01730	UPF0337 protein SAOUHSC_01730	Completeproteome;Referenceproteome	6.6824	5	88.3	1350100000	51	+	3.84689	-1.1682	0.000403909	22.1175	22.0864	22.2183	21.6625	23.1712	23.3554	23.0644	23.1665
Q2FXV2	Q2FXV2	SAOUHSC_01729		Completeproteome;Referenceproteome	5.6551	2	45.8	2149300000	32	+	2.32143	-1.21612	0.00254978	23.3477	24.3652	23.8278	23.4623	24.7193	25.3614	25.0894	24.6975
Q2FXV3	Q2FXV3	SAOUHSC_01728		Completeproteome;Referenceproteome	37.984	10	43.3	1688300000	145	+	1.26804	-0.47822	0.025136	21.7882	22.4585	22.5053	22.6058	22.7766	22.9662	22.8942	22.6335
Q2FXV4	Q2FXV4	SAOUHSC_01727		Completeproteome;Pyridoxalphosphate;Referenceproteome	42.484	8	38.9	2307800000	137	+	1.24168	0.231551	0.0268481	24.7085	24.9896	24.5568	24.5959	24.4865	24.4447	24.5104	24.483
Q2FXV6	Q2FXV6	mnmA	tRNA-specific 2-thiouridylase MnmA	ATP-binding;Completeproteome;Cytoplasm;Disulfidebond;Nucleotide-binding;Referenceproteome;RNA-binding;Transferase;tRNA-binding;tRNAprocessing	42.15	15	37.4	8597000000	348	+	2.10284	-0.288306	0.00429752	24.2686	24.3919	24.5138	24.4326	24.5662	24.6391	24.7966	24.7581
Q2FXV7	Q2FXV7	SAOUHSC_01724		Completeproteome;Referenceproteome	25.701	2	5.9	265030000	21	+	1.05754	-0.635839	0.042434	21.0499	21.8585	21.4296	20.9421	22.6435	21.6155	21.7967	21.7677
Q2FXV8	Q2FXV8	recD2	ATP-dependent RecD-like DNA helicase	ATP-binding;Completeproteome;DNA-binding;Helicase;Hydrolase;Nucleotide-binding;Referenceproteome	93.048	19	30.5	1788200000	144	+	3.29546	-0.432493	0.000563246	22.9803	23.1883	23.0776	23.1495	23.4334	23.6378	23.4891	23.5653
Q2FXV9	Q2FXV9	alaS	Alanine--tRNA ligase	Aminoacyl-tRNAsynthetase;ATP-binding;Completeproteome;Cytoplasm;Ligase;Metal-binding;Nucleotide-binding;Proteinbiosynthesis;Referenceproteome;RNA-binding;tRNA-binding;Zinc	98.519	71	64.4	34958000000	1083	+	1.54088	-0.153193	0.014035	26.2455	26.4051	26.431	26.4613	26.5151	26.4922	26.5478	26.6005
Q2FXW0	Q2FXW0	SAOUHSC_01721	UPF0297 protein SAOUHSC_01721	Completeproteome;Referenceproteome	10.303	9	95.3	8892000000	217		0.392309	0.158209	0.240481	26.6886	26.7166	26.6918	26.0258	26.2494	26.5095	26.3812	26.3498
Q2FXW1	Q2FXW1	SAOUHSC_01720	Putative Holliday junction resolvase	Completeproteome;Cytoplasm;DNAdamage;DNArecombination;DNArepair;Hydrolase;Nuclease;Referenceproteome	15.865	13	92.3	2068800000	105		0.750989	0.165882	0.0899687	23.9379	24.0947	24.1697	23.9165	23.6396	23.8911	24.0763	23.8481
Q2FXW2	Q2FXW2	SAOUHSC_01719	UPF0473 protein SAOUHSC_01719	Completeproteome;Referenceproteome	11.949	7	64.7	17531000000	222		0.0982813	-0.0611739	0.642959	27.1217	27.3416	27.4049	26.4917	27.3077	26.9986	27.3147	26.9836
Q2FXW3	Q2FXW3	SAOUHSC_01718		Completeproteome;Referenceproteome	24.527	8	50.5	2284700000	87	+	3.20095	0.557824	0.000669725	24.6325	24.8244	24.6234	24.7713	24.0984	24.0891	24.07	24.3629
Q2FXW4	Q2FXW4	SAOUHSC_01717		Completeproteome;Referenceproteome	35.958	10	28	3296100000	111	+	1.5748	0.207265	0.0129067	24.6591	24.9277	24.7909	24.9407	24.5612	24.667	24.6625	24.5987
Q2FXW5	Q2FXW5	SAOUHSC_01716		Completeproteome;Referenceproteome	47.655	17	50	5159900000	276	+	1.78716	0.242834	0.00809223	25.0842	25.0489	25.0526	24.8291	24.8742	24.6896	24.7879	24.6918
Q2FXW6	Q2FXW6	udk	Uridine kinase	ATP-binding;Completeproteome;Cytoplasm;Kinase;Nucleotide-binding;Referenceproteome;Transferase	23.505	21	78.7	6243200000	302		0.244015	0.0321155	0.381755	25.0814	25.14	24.9805	25.2272	25.1063	25.0713	25.081	25.042
Q2FXW7	Q2FXW7	greA	Transcription elongation factor GreA	Coiledcoil;Completeproteome;DNA-binding;Referenceproteome;Transcription;Transcriptionregulation	17.743	18	94.3	71436000000	516		0.22588	-0.10851	0.407689	28.9548	28.7407	28.8297	28.0917	28.7478	28.7845	28.7871	28.7314
Q2FXW8	Q2FXW8	SAOUHSC_01712		Completeproteome;Referenceproteome	27.001	5	25.3	285120000	43		0.0575795	0.020052	0.763887	21.965	21.7589	21.5895	22.1435	21.9138	21.8067	21.8315	21.8246
Q2FXW9	Q2FXW9	SAOUHSC_01711		Completeproteome;Referenceproteome	33.556	10	42.4	405490000	47		0.689894	-0.272998	0.1051	21.9226	21.5114	22.1299	21.9597	21.7712	22.333	22.3882	22.1232
Q2FXX0	Q2FXX0	SAOUHSC_01710		Completeproteome;Referenceproteome	16.793	3	13.4	402560000	21		0.165919	-0.118969	0.497358	22.7487	21.9044	22.4711	22.3986	22.001	22.3022	22.946	22.7496
Q2FXX1	Q2FXX1	SAOUHSC_01709		Completeproteome;Ligase;Referenceproteome	50.224	10	35.8	563340000	57	+	1.97446	-0.603315	0.00572917	22.7901	22.2759	22.7076	22.32	22.8825	23.0552	23.3305	23.2387
Q2FXX2	Q2FXX2	SAOUHSC_01708	UPF0271 protein SAOUHSC_01708	Completeproteome;Referenceproteome	27.448	3	16	89194000	17		0.330039	-0.387053	0.290231	20.2706	21.8397	20.0566	19.8311	20.915	20.3004	21.1495	21.1814
Q2FXX4	Q2FXX4	SAOUHSC_01706		Completeproteome;Referenceproteome	47.684	9	29.8	277780000	22		0.00287653	-0.00593853	0.986353	22.9144	20.0739	22.6115	22.0666	21.2261	21.9135	22.103	22.4475
Q2FXX8	Q2FXX8	mtnN	5'-methylthioadenosine/S-adenosylhomocysteine nucleosidase	Amino-acidbiosynthesis;Completeproteome;Hydrolase;Methioninebiosynthesis;Referenceproteome	24.534	15	85.5	8081400000	270	+	1.49485	0.23721	0.0153369	25.3397	25.5513	25.696	25.5501	25.2445	25.2363	25.2833	25.4242
Q2FXX9	Q2FXX9	SAOUHSC_01701		Completeproteome;Hydrolase;Referenceproteome	20.219	20	88	6196700000	304		0.0273367	-0.019948	0.881928	24.3628	25.3891	25.213	25.2052	24.8238	24.9867	25.2278	25.2116
Q2FXY0	Q2FXY0	SAOUHSC_01700		Completeproteome;Referenceproteome	41.086	17	44	4653200000	220	+	1.94789	0.195624	0.00584299	24.24	24.3568	24.3629	24.2588	24.015	24.2213	24.0746	24.1252
Q2FXY1	Q2FXY1	aroE	Shikimate dehydrogenase (NADP(+))	Amino-acidbiosynthesis;Aromaticaminoacidbiosynthesis;Completeproteome;NADP;Oxidoreductase;Referenceproteome	29.879	10	52.6	2191300000	85	+	3.4763	0.663009	0.000473684	23.9586	24.1334	24.3595	24.2847	23.4891	23.4871	23.5511	23.557
Q2FXY2	Q2FXY2	SAOUHSC_01698		Completeproteome;Referenceproteome	11.048	9	49	3429100000	107	+	2.45914	-0.186437	0.00201585	24.5384	24.59	24.4549	24.532	24.7723	24.6714	24.6604	24.7568
Q2FXY3	Q2FXY3	nadD	Probable nicotinate-nucleotide adenylyltransferase	ATP-binding;Completeproteome;NAD;Nucleotide-binding;Nucleotidyltransferase;Pyridinenucleotidebiosynthesis;Referenceproteome;Transferase	22.127	4	22.2	481700000	29		0.813286	0.189938	0.0771216	22.2142	22.2616	22.4316	22.2801	21.8359	22.0385	22.2675	22.2859
Q2FXY5	Q2FXY5	SAOUHSC_01690		Completeproteome;Referenceproteome	37.936	7	25.6	368430000	44		0.795676	0.228853	0.0799966	21.2289	21.6203	21.6042	21.176	21.3954	21.1885	21.0983	21.0317
Q2FXY6	Q2FXY6	rpsT	30S ribosomal protein S20	Completeproteome;Referenceproteome;Ribonucleoprotein;Ribosomalprotein;RNA-binding;rRNA-binding	9.0213	14	80.7	133540000000	457	+	1.67851	-0.128066	0.0100857	30.6033	30.5881	30.6118	30.6797	30.8345	30.7052	30.7794	30.676
Q2FXY7	Q2FXY7	lepA	Elongation factor 4	Cellmembrane;Completeproteome;GTP-binding;Hydrolase;Membrane;Nucleotide-binding;Proteinbiosynthesis;Referenceproteome	68.174	44	75.8	11854000000	590	+	2.21676	-0.206817	0.0033305	25.3442	25.2793	25.35	25.4332	25.4849	25.6605	25.5146	25.574
Q2FXY9	Q2FXY9	SAOUHSC_01686		Completeproteome;Referenceproteome	42.84	6	24.1	1714800000	78		0.140218	-0.0328469	0.547602	24.8465	25.2018	25.1421	25.0682	25.1253	25.0957	24.9819	25.187
Q2FXZ0	Q2FXZ0	hrcA	Heat-inducible transcription repressor HrcA	Completeproteome;Referenceproteome;Repressor;Stressresponse;Transcription;Transcriptionregulation	37.015	5	25.5	152950000	12	+	1.86897	-1.164	0.00663	20.3884	21.2472	21.2187	20.3356	21.891	22.3177	21.3562	22.2809
Q2FXZ1	Q2FXZ1	grpE	Protein GrpE	Chaperone;Completeproteome;Cytoplasm;Referenceproteome;Stressresponse	24.008	17	69.2	29033000000	312	+	1.26094	-0.231444	0.0253946	27.5237	27.5833	27.688	27.2585	27.6639	27.7955	27.8022	27.7177
Q2FXZ2	Q2FXZ2	dnaK	Chaperone protein DnaK	ATP-binding;Chaperone;Completeproteome;Nucleotide-binding;Phosphoprotein;Referenceproteome;Stressresponse	66.361	71	80.2	200480000000	1709	+	5.12576	-0.590735	0	29.8337	29.8914	29.7467	29.8513	30.4589	30.4792	30.3837	30.364
Q2FXZ3	Q2FXZ3	dnaJ	Chaperone protein DnaJ	Chaperone;Completeproteome;Cytoplasm;DNAreplication;Metal-binding;Referenceproteome;Repeat;Stressresponse;Zinc;Zinc-finger	41.76	11	37.7	2258600000	136	+	2.22782	-0.366335	0.00317024	24.0746	23.8872	23.7631	23.9077	24.4456	24.2721	24.2005	24.1799
Q2FXZ4	Q2FXZ4	prmA	Ribosomal protein L11 methyltransferase	Completeproteome;Cytoplasm;Methyltransferase;Referenceproteome;Transferase	35.513	10	32.1	6537000000	184	+	1.18641	0.149633	0.0306938	25.7896	25.7883	26.0376	25.9381	25.7065	25.6864	25.7584	25.8038
Q2FXZ5	Q2FXZ5	SAOUHSC_01680	Ribosomal RNA small subunit methyltransferase E	Completeproteome;Cytoplasm;Methyltransferase;Referenceproteome;rRNAprocessing;S-adenosyl-L-methionine;Transferase	28.469	6	25.2	1400700000	45	+	2.19538	-0.621493	0.00339069	24.0906	24.3061	24.3729	24.3625	24.7838	24.8981	24.6506	25.2854
Q2FXZ6	Q2FXZ6	SAOUHSC_01679		Completeproteome;Referenceproteome	50.955	30	61.6	8506500000	388	+	1.67655	-0.1752	0.0101848	24.8489	24.7718	24.8398	24.8975	24.8757	25.013	25.1075	25.0627
Q2FXZ7	Q2FXZ7	rpsU	30S ribosomal protein S21	Completeproteome;Referenceproteome;Ribonucleoprotein;Ribosomalprotein	6.9721	13	69	47710000000	297	+	1.75464	-0.202338	0.008509	28.4964	28.5508	28.5944	28.6046	28.8755	28.6069	28.7613	28.8118
Q2FXZ8	Q2FXZ8	SAOUHSC_01677		Completeproteome;Referenceproteome	25.002	4	11.5	1037300000	36	+	0.999674	0.333708	0.0489094	24.0293	24.1912	24.3113	24.7631	24.0648	23.7919	24.0059	24.0976
Q2FXZ9	Q2FXZ9	SAOUHSC_01676	UPF0365 protein SAOUHSC_01676	Cellmembrane;Completeproteome;Membrane;Referenceproteome;Transmembrane;Transmembranehelix	35.181	50	83.3	173010000000	1422	+	2.97225	0.408704	0.000707317	28.8972	29.1299	29.1837	29.1668	28.6346	28.6976	28.6833	28.7272
Q2FY00	Q2FY00	SAOUHSC_01675		Completeproteome;Referenceproteome	27.256	14	58.6	4606800000	179	+	2.51453	0.256576	0.00191503	25.1135	25.0353	24.9441	25.098	24.8389	24.864	24.6996	24.762
Q2FY01	Q2FY01	SAOUHSC_01673		Completeproteome;Referenceproteome	34.913	29	77.8	11260000000	320		0.310095	-0.0663209	0.31082	25.1444	25.4539	25.5296	25.3013	25.3895	25.4508	25.3635	25.4909
Q2FY02	Q2FY02	ybeY	Endoribonuclease YbeY	Completeproteome;Cytoplasm;Endonuclease;Hydrolase;Metal-binding;Nuclease;Referenceproteome;Ribosomebiogenesis;rRNAprocessing;Zinc	17.952	4	20	176280000	24		0.619309	0.42195	0.127035	21.8054	22.5059	22.654	22.9707	21.5492	21.9243	22.2501	22.5246
Q2FY04	Q2FY04	SAOUHSC_01670		Completeproteome;Hydrolase;Referenceproteome	14.964	7	32.8	1363600000	145	+	1.28756	-0.174124	0.0239757	23.8104	23.6219	23.6645	23.4702	23.8092	23.8221	23.777	23.8552
Q2FY06	Q2FY06	era	GTPase Era	Cellmembrane;Completeproteome;Cytoplasm;GTP-binding;Membrane;Nucleotide-binding;Referenceproteome;Ribosomebiogenesis;RNA-binding;rRNA-binding	34.27	27	76.3	10605000000	350		0.84749	-0.264586	0.0713988	24.8556	25.4008	25.343	25.5223	25.4343	25.4681	25.615	25.6627
Q2FY07	Q2FY07	recO	DNA repair protein RecO	Completeproteome;DNAdamage;DNArecombination;DNArepair;Referenceproteome	28.206	2	14.1	134860000	31		0.775938	-0.334997	0.0847442	20.8591	21.1177	21.3912	21.0778	21.0026	21.5639	21.3458	21.8735
Q2FY08	Q2FY08	glyQS	Glycine--tRNA ligase	Aminoacyl-tRNAsynthetase;ATP-binding;Completeproteome;Cytoplasm;Ligase;Nucleotide-binding;Proteinbiosynthesis;Referenceproteome	53.62	46	75.8	109680000000	1157	+	1.35795	-0.162286	0.0206277	28.0625	28.1929	28.1778	28.2936	28.2307	28.3738	28.4345	28.337
Q2FY09	Q2FY09	SAOUHSC_01665		Completeproteome;Referenceproteome	20.56	10	58.7	2453600000	123	+	1.46431	0.442288	0.016209	23.8583	23.7668	23.9957	23.8544	23.0893	23.2371	23.7081	23.6715
Q2FY10	Q2FY10	SAOUHSC_01664	Putative pyruvate. phosphate dikinase regulatory protein	Completeproteome;Kinase;Nucleotide-binding;Referenceproteome;Serine/threonine-proteinkinase;Transferase	30.784	27	73.5	8443900000	449	+	2.12107	0.25698	0.00418889	24.7803	24.8022	24.8683	24.9896	24.6612	24.6797	24.4809	24.5907
Q2FY11	Q2FY11	dnaG	DNA primase	Completeproteome;DNA-binding;DNA-directedRNApolymerase;DNAreplication;Magnesium;Metal-binding;Nucleotidyltransferase;Primosome;Referenceproteome;Transcription;Transferase;Zinc;Zinc-finger	69.293	24	37.7	2586500000	190	+	3.76889	0.83102	0.000388715	23.9704	24.0051	24.224	24.0129	22.9785	23.2638	23.3273	23.3187
Q2FY13	Q2FY13	SAOUHSC_01661		Completeproteome;Referenceproteome	25.508	10	41.3	4477700000	167	+	1.78949	0.162444	0.00805346	24.9397	24.9537	24.8979	24.8467	24.7968	24.6934	24.8401	24.6577
Q2FY14	Q2FY14	SAOUHSC_01660	Putative GTP cyclohydrolase 1 type 2	Completeproteome;GTP-binding;Hydrolase;Metal-binding;Nucleotide-binding;Referenceproteome	41.152	9	31.1	916390000	64	+	2.2633	0.76363	0.0028064	23.7894	23.8398	23.3351	23.5677	22.7013	22.6049	23.2228	22.9485
Q2FY15	Q2FY15	cshB	DEAD-box ATP-dependent RNA helicase CshB	ATP-binding;Completeproteome;Cytoplasm;Helicase;Hydrolase;Nucleotide-binding;Referenceproteome;RNA-binding;Stressresponse	51.08	31	67.2	16270000000	514	+	2.04305	0.220459	0.00468371	26.4166	26.5921	26.5292	26.6313	26.3499	26.2849	26.2488	26.4038
Q2FY16	Q2FY16	nfo	Probable endonuclease 4	Completeproteome;DNAdamage;DNArepair;Endonuclease;Hydrolase;Metal-binding;Nuclease;Referenceproteome;Zinc	33.158	23	76.7	11729000000	376	+	1.05201	0.17373	0.0427735	25.6278	25.7688	25.9648	25.8138	25.4772	25.6486	25.7115	25.6431
Q2FY17	Q2FY17	SAOUHSC_01657		ATP-binding;Completeproteome;Nucleotide-binding;Referenceproteome	29.171	8	31.8	456170000	45	+	1.40544	-1.36636	0.0183264	20.103	22.3638	21.8942	21.1644	22.9833	23.0514	22.6333	22.3226
Q2FY18	Q2FY18	SAOUHSC_01656		Completeproteome;Membrane;Referenceproteome;Transmembrane;Transmembranehelix;Transport	31.606	1	2.8	55334000	14	+	1.38557	-0.203718	0.019343	20.5964	20.4217	20.5513	20.6566	20.7066	20.6272	20.9101	20.797
Q2FY19	Q2FY19	fur	Ferric uptake regulation protein	Completeproteome;Cytoplasm;DNA-binding;Iron;Metal-binding;Referenceproteome;Repressor;Transcription;Transcriptionregulation;Zinc	15.922	6	54.4	988710000	104	+	2.7591	-0.734735	0.00128962	23.1761	23.0373	22.8766	22.7366	23.5949	23.8542	23.4599	23.8564
Q2FY21	Q2FY21	SAOUHSC_01652		Completeproteome;Referenceproteome	77.237	42	58.5	4635900000	542	+	4.25198	-0.367337	0.000296943	22.9205	22.9521	22.9478	23.0591	23.2859	23.3314	23.3502	23.3814
Q2FY22	Q2FY22	rpmG2	50S ribosomal protein L33 2	Completeproteome;Referenceproteome;Ribonucleoprotein;Ribosomalprotein	5.8727	2	20.4	6569400000	40		0.138227	-0.0332222	0.55045	26.6822	26.5228	26.6915	26.7203	26.7236	26.4791	26.6843	26.8627
Q2FY23	Q2FY23	SAOUHSC_01650	5-formyltetrahydrofolate cyclo-ligase	ATP-binding;Completeproteome;Magnesium;Metal-binding;Nucleotide-binding;Referenceproteome	21	1	10.1	20960000	3		0.398906	0.193032	0.236381	20.3598	20.2473	20.6308	20.4494	19.841	19.939	20.5557	20.5794
Q2FY24	Q2FY24	SAOUHSC_01649		Completeproteome;Referenceproteome	39.398	13	29.2	1545400000	160		0.00634473	0.00105381	0.972159	22.8839	22.9989	22.8706	22.8636	22.8265	22.9288	23.0212	22.8362
Q2FY25	Q2FY25	SAOUHSC_01648		Completeproteome;Referenceproteome	17.385	7	53.3	307260000	38		0.857188	-0.310372	0.0696981	21.3377	21.7142	21.3973	21.8762	21.7375	22.2133	21.6374	21.9787
Q2FY27	Q2FY27	SAOUHSC_01646		Completeproteome;Kinase;Referenceproteome;Transferase	35.077	15	43.9	11886000000	347	+	2.03342	-0.427841	0.00477867	25.6602	26.0966	25.9298	25.9783	26.2382	26.4372	26.2234	26.4774
Q2FY28	Q2FY28	SAOUHSC_01645		Completeproteome;Referenceproteome	12.282	12	51.4	5399600000	207	+	4.05481	-0.294863	0.000466165	24.8226	24.816	24.803	24.8629	25.1439	25.1893	25.056	25.0948
Q2FY29	Q2FY29	SAOUHSC_01644		Completeproteome;Referenceproteome	23.141	3	13	179410000	5		0.625535	-0.288651	0.124757	21.965	21.144	21.0868	21.3775	21.8804	21.6379	21.7507	21.4588
Q2FY33	Q2FY33	gcvT	Aminomethyltransferase	Aminotransferase;Completeproteome;Referenceproteome;Transferase	40.457	33	78.8	34639000000	627	+	4.80903	-0.943026	0	26.5423	26.5159	26.4176	26.4031	27.2544	27.4244	27.5784	27.3939
Q2FY34	Q2FY34	gcvPA	Probable glycine dehydrogenase (decarboxylating) subunit 1	Completeproteome;Oxidoreductase;Referenceproteome	49.716	28	68.1	51855000000	554	+	6.03514	-1.052	0	27.128	27.1316	27.1489	27.1679	28.1344	28.2326	28.322	28.0954
Q2FY35	Q2FY35	gcvPB	Probable glycine dehydrogenase (decarboxylating) subunit 2	Completeproteome;Oxidoreductase;Pyridoxalphosphate;Referenceproteome	54.781	35	59.6	29707000000	627	+	4.74293	-1.06544	0	25.7941	25.883	25.9877	25.8907	26.7667	26.9534	27.1464	26.9507
Q2FY36	Q2FY36	SAOUHSC_01630		Completeproteome;Referenceproteome	14.803	17	56.2	12734000000	441	+	4.01913	0.563364	0.000446043	26.989	27.0519	27.2124	27.1929	26.4736	26.538	26.5704	26.6108
Q2FY37	Q2FY37	lipM	Octanoyltransferase LipM	Acyltransferase;Completeproteome;Referenceproteome;Transferase	31.881	18	68.5	5187400000	259		0.132321	-0.0247002	0.562593	24.9339	25.1603	25.0034	24.9275	24.9002	25.0858	25.0929	25.045
Q2FY39	Q2FY39	SAOUHSC_01627		Completeproteome;Referenceproteome	21.472	5	31.1	1816500000	110		0.356712	0.131414	0.267357	23.7213	24.1929	24.0872	24.1362	23.6258	23.7939	24.1365	24.0558
Q2FY40	Q2FY40	SAOUHSC_01626		Completeproteome;Dipeptidase;Hydrolase;Metal-binding;Protease;Referenceproteome	39.337	44	79.6	37223000000	670	+	1.8472	-0.217214	0.00720596	26.8138	27.0921	26.9752	26.9734	27.2396	27.1056	27.1957	27.1825
Q2FY41	Q2FY41	efp	Elongation factor P	Completeproteome;Cytoplasm;Elongationfactor;Proteinbiosynthesis;Referenceproteome	20.554	15	87.6	34337000000	350	+	3.69597	-0.439111	0.0003769	26.7392	26.8132	26.8227	26.8963	27.3004	27.1706	27.1967	27.3602
Q2FY43	Q2FY43	SAOUHSC_01623		Completeproteome;Ligase;Referenceproteome	50.049	35	69.2	19443000000	577	+	2.26879	-0.273375	0.00272886	25.5626	25.7451	25.7673	25.7963	25.905	25.9807	26.0843	25.9949
Q2FY44	Q2FY44	SAOUHSC_01622		Completeproteome;Referenceproteome	13.273	8	70	5385600000	154	+	1.01098	-0.226034	0.0474109	25.4011	25.7415	25.5048	25.6529	25.9588	25.5654	25.7811	25.899
Q2FY45	Q2FY45	nusB	N utilization substance protein B homolog	Completeproteome;Referenceproteome;Transcription;Transcriptionregulation;Transcriptiontermination	15.061	5	42.6	3580800000	132	+	2.38709	-0.40652	0.00256836	24.6821	24.9234	25.0334	24.8753	25.2133	25.2925	25.2032	25.4313
Q2FY46	Q2FY46	xseA	Exodeoxyribonuclease 7 large subunit	Completeproteome;Cytoplasm;Exonuclease;Hydrolase;Nuclease;Referenceproteome	50.894	20	57.1	1605800000	151		0.423536	-0.138472	0.220908	23.5163	23.0612	23.4835	23.3461	23.5232	23.2234	23.4963	23.718
Q2FY47	Q2FY47	xseB	Exodeoxyribonuclease 7 small subunit	Completeproteome;Cytoplasm;Exonuclease;Hydrolase;Nuclease;Referenceproteome	8.7596	1	26.3	461060000	41		0.0276627	-0.0185862	0.8806	23.8892	23.3713	23.37	22.8827	23.6427	23.153	23.4651	23.3268
Q2FY48	Q2FY48	SAOUHSC_01618		Completeproteome;Isoprenebiosynthesis;Referenceproteome;Transferase	32.808	13	74.7	3698800000	205		0.18762	-0.0455647	0.459879	24.3888	24.5206	24.2167	24.1694	24.2526	24.3187	24.4646	24.4418
Q2FY49	Q2FY49	argR	Arginine repressor	Amino-acidbiosynthesis;Argininebiosynthesis;Completeproteome;Cytoplasm;DNA-binding;Referenceproteome;Repressor;Transcription;Transcriptionregulation	17.097	18	69.3	8896300000	350	+	2.72639	0.232573	0.00126882	26.6007	26.4762	26.4688	26.4082	26.2719	26.2733	26.2757	26.2028
Q2FY50	Q2FY50	SAOUHSC_01615	DNA repair protein RecN	ATP-binding;Completeproteome;DNAdamage;DNArepair;Nucleotide-binding;Referenceproteome	64.321	34	56.9	8387400000	546	+	3.91925	0.482946	0.000416107	24.8897	24.7779	24.9131	24.9955	24.3875	24.3472	24.4973	24.4124
Q2FY51	Q2FY51	SAOUHSC_01614	Dihydrolipoyl dehydrogenase	Completeproteome;FAD;Flavoprotein;NAD;Oxidoreductase;Redox-activecenter;Referenceproteome	51.111	21	39.1	3032400000	213	+	1.31075	0.134099	0.0230429	23.9837	24.0694	24.2072	24.1558	23.942	24.0393	23.9565	23.9419
Q2FY52	Q2FY52	SAOUHSC_01613		Completeproteome;Oxidoreductase;Referenceproteome	36.229	26	78.2	14634000000	537	+	2.74073	0.140275	0.00128029	25.7626	25.8361	25.8552	25.8031	25.7028	25.6351	25.7019	25.6562
Q2FY53	Q2FY53	SAOUHSC_01612		Completeproteome;Oxidoreductase;Referenceproteome	36.061	20	61.5	22397000000	447		0.439797	0.0682244	0.210227	27.0625	27.3079	27.1584	27.2329	27.0533	27.0524	27.2439	27.1392
Q2FY54	Q2FY54	SAOUHSC_01611		Acyltransferase;Completeproteome;Lipoyl;Referenceproteome;Transferase	46.725	29	57.3	8880500000	457		0.621042	-0.0537138	0.126502	24.7547	24.7468	24.7334	24.7275	24.9102	24.7397	24.7358	24.7915
Q2FY55	Q2FY55	SAOUHSC_01610	UPF0403 protein SAOUHSC_01610	Completeproteome;Referenceproteome	16.221	9	55.2	2288800000	141	+	4.05355	-0.982677	0.000464419	23.5432	23.4026	23.2584	23.0657	24.3784	24.2978	24.2481	24.2763
Q2FY59	Q2FY59	SAOUHSC_01606		Aminopeptidase;Completeproteome;Hydrolase;Protease;Referenceproteome	40.259	19	48	4497400000	213	+	2.62241	-0.326342	0.00150168	25.2012	25.1168	25.0705	25.1625	25.4653	25.2993	25.5316	25.5602
Q2FY60	Q2FY60	SAOUHSC_01605	6-phosphogluconate dehydrogenase. decarboxylating	Completeproteome;Gluconateutilization;NADP;Oxidoreductase;Pentoseshunt;Referenceproteome	51.802	49	86.1	94497000000	1039	+	6.20402	-0.753689	0	27.952	28.0855	28.0542	28.0352	28.7413	28.7718	28.7928	28.8357
Q2FY61	Q2FY61	SAOUHSC_01604		Completeproteome;Referenceproteome	13.89	14	66.7	10387000000	325	+	3.61968	-0.870942	0.000518732	25.2452	25.3621	25.5096	24.9989	26.1652	26.1108	26.2297	26.0939
Q2FY63	Q2FY63	SAOUHSC_01602		Completeproteome;DNA-binding;Referenceproteome;Transcription;Transcriptionregulation	38.39	9	29.5	1745500000	101	+	2.68556	-0.640305	0.00132632	23.0054	23.4466	23.1371	23.2754	23.6405	23.957	23.8334	23.9947
Q2FY64	Q2FY64	SAOUHSC_01601	Alpha-amylase	Carbohydratemetabolism;Completeproteome;Glycosidase;Hydrolase;Referenceproteome	63.905	27	52.3	16229000000	406	+	4.07888	-0.472704	0.000476923	26.0646	26.2702	26.142	26.1266	26.6151	26.674	26.5544	26.6508
Q2FY65	Q2FY65	SAOUHSC_01600		Completeproteome;DNA-binding;Referenceproteome	34.374	4	18.9	347550000	25	+	3.05811	-0.686733	0.000619958	21.5569	21.4179	21.4889	21.4329	21.9011	22.0768	22.3868	22.2789
Q2FY66	Q2FY66	zwf	Glucose-6-phosphate 1-dehydrogenase	Carbohydratemetabolism;Completeproteome;Glucosemetabolism;NADP;Oxidoreductase;Referenceproteome	56.965	43	78.3	19105000000	524	+	2.26301	-0.201483	0.00280233	25.4961	25.596	25.5146	25.4225	25.6157	25.7292	25.7544	25.7358
Q2FY67	Q2FY67	rnz	Ribonuclease Z	Completeproteome;Endonuclease;Hydrolase;Metal-binding;Nuclease;Referenceproteome;tRNAprocessing;Zinc	34.584	7	38.6	1708100000	99	+	2.49478	-0.501013	0.00189951	23.3325	23.409	23.6874	23.2585	23.8336	24.0148	24.0005	23.8426
Q2FY68	Q2FY68	proC	Pyrroline-5-carboxylate reductase	Amino-acidbiosynthesis;Completeproteome;Cytoplasm;NADP;Oxidoreductase;Prolinebiosynthesis;Referenceproteome	28.758	13	54.4	3486800000	192	+	6.93942	-1.67539	0	22.963	23.0059	22.8611	22.8846	24.4963	24.583	24.6116	24.7254
Q2FY71	Q2FY71	SAOUHSC_01594		Completeproteome;Referenceproteome	33.505	19	57.3	9903600000	263	+	4.58315	-0.849701	0	25.2857	25.4642	25.3727	25.338	26.0509	26.3381	26.1811	26.2891
Q2FY72	Q2FY72	SAOUHSC_01593		Completeproteome;Hydrolase;Referenceproteome	20.439	9	41.1	1097600000	89	+	2.04089	-0.860345	0.00473458	22.7938	23.2552	22.2454	22.9216	23.8303	23.7817	23.5869	23.4585
Q2FY73	Q2FY73	SAOUHSC_01592		Completeproteome;DNA-binding;Referenceproteome	17.243	13	57	1912600000	181	+	2.92789	-0.468155	0.000689109	22.9269	22.9542	23.0314	22.7694	23.3214	23.5585	23.2925	23.3822
Q2FY74	Q2FY74	xerD	Tyrosine recombinase XerD	Cellcycle;Celldivision;Chromosomepartition;Completeproteome;Cytoplasm;DNA-binding;DNAintegration;DNArecombination;Referenceproteome	34.132	11	39.3	787030000	80	+	4.69831	-0.768577	0	21.356	21.0886	21.1967	21.2804	21.9761	21.9311	22.0336	22.0551
Q2FY76	Q2FY76	scpA	Segregation and condensation protein A	Cellcycle;Celldivision;Chromosomepartition;Completeproteome;Cytoplasm;Referenceproteome	28.67	10	43.2	985350000	59	+	1.43852	-0.278039	0.0171067	22.8152	23.1829	23.0636	23.1582	23.2946	23.2226	23.5065	23.3084
Q2FY77	Q2FY77	scpB	Segregation and condensation protein B	Cellcycle;Celldivision;Chromosomepartition;Completeproteome;Cytoplasm;Referenceproteome	20.236	8	45	1844300000	105		0.887815	-0.390408	0.0650643	22.6788	23.0718	23.5381	23.5524	23.4291	23.585	23.5963	23.7924
Q2FY78	Q2FY78	SAOUHSC_01587	Pseudouridine synthase	Completeproteome;Isomerase;Lyase;Referenceproteome;RNA-binding	27.969	28	72.7	14563000000	482	+	5.94597	-0.793013	0	25.9564	25.8058	25.8536	25.9143	26.6959	26.6518	26.6252	26.7292
Q2FY79	Q2FY79	srrA	Transcriptional regulatory protein SrrA	Activator;Completeproteome;Cytoplasm;DNA-binding;Phosphoprotein;Referenceproteome;Repressor;Transcription;Transcriptionregulation;Two-componentregulatorysystem	28.161	29	81.3	27331000000	541	+	1.07895	-0.111219	0.0404804	26.8342	26.8729	26.9814	27.0394	27.013	27.1032	26.9928	27.0638
Q2FY80	Q2FY80	srrB	Sensor protein SrrB	ATP-binding;Cellmembrane;Completeproteome;Kinase;Membrane;Nucleotide-binding;Phosphoprotein;Referenceproteome;Transferase;Transmembrane;Transmembranehelix;Two-componentregulatorysystem	66.075	30	60.9	4614400000	324	+	2.67411	-0.465647	0.00140278	23.3527	23.6012	23.4028	23.7186	23.9592	24.0483	24.015	23.9154
Q2FY81;Q2FYE3;Q2FYE2	Q2FY81	SAOUHSC_01511;SAOUHSC_01512;SAOUHSC_01584		Completeproteome;Referenceproteome	33.576	17	56.1	3343000000	210	+	4.02218	-0.491515	0.000447653	24.2937	24.3719	24.1933	24.3417	24.8144	24.8814	24.7099	24.7609
Q2FY82	Q2FY82	SAOUHSC_01583		Completeproteome;Referenceproteome	77.18	4	9	68931000	6	+	1.557	-0.347379	0.0134305	20.4167	20.8728	20.9298	20.8344	21.1772	21.131	21.0699	21.0651
Q2FY84	Q2FY84			Completeproteome;Referenceproteome	23.83	3	23.5	31203000	4		0.148226	-0.0961156	0.53063	20.3454	20.4217	19.5654	19.5149	20.0563	19.9839	20.0272	20.1645
Q2FY87	Q2FY87	SAOUHSC_01577		Completeproteome;Referenceproteome	13.271	8	86.7	2074100000	129		0.676722	0.208163	0.108955	24.5232	24.8752	24.4332	24.9665	24.294	24.6231	24.4923	24.556
Q2FY88	Q2FY88	SAOUHSC_01576		Completeproteome;Exonuclease;Hydrolase;Nuclease;Referenceproteome	35.9	19	53.5	4532700000	158		0.584501	-0.219457	0.139158	25.96	26.4805	26.6684	26.6553	26.646	26.7914	26.7012	26.5035
Q2FY89	Q2FY89	SAOUHSC_01575		Completeproteome;Referenceproteome	27.017	15	57.8	4181600000	213		0.167101	-0.029532	0.495264	24.5549	24.2679	24.3691	24.41	24.5095	24.4318	24.4331	24.3455
Q2FYE0	Q2FYE0	SAOUHSC_01514		Completeproteome;Referenceproteome	32.984	10	29.5	1748000000	150	+	3.10616	0.723455	0.000640351	23.719	23.7885	23.8262	23.9481	23.1761	22.8741	22.9854	23.3523
Q2FYE8	Q2FYE8	SAOUHSC_01504		Completeproteome;Referenceproteome	7.9185	1	18.9	249840000	4	+	1.79602	0.588227	0.00801954	23.4293	22.8738	23.1904	22.6884	22.5829	22.3238	22.5551	22.3672
Q2FYF0	Q2FYF0	SAOUHSC_01502		ATP-binding;Completeproteome;Helicase;Hydrolase;Nucleotide-binding;Referenceproteome	52.73	5	12.2	788610000	66		0.454844	0.17489	0.200763	22.9959	23.3153	23.1713	23.5841	23.3054	23.2859	22.8291	22.9467
Q2FYF1	Q2FYF1	ebpS	Elastin-binding protein EbpS	Cellmembrane;Completeproteome;Membrane;Referenceproteome;Transmembrane;Transmembranehelix	53.221	21	37	16412000000	439		0.357041	0.0549464	0.267134	26.539	26.7286	26.8102	26.8238	26.6487	26.678	26.6598	26.6954
Q2FYF3	Q2FYF3	SAOUHSC_01499		Completeproteome;Referenceproteome	36.736	18	66.8	3947000000	264	+	3.41518	0.473664	0.000602041	24.1968	24.3293	24.1784	24.0424	23.7669	23.7566	23.6315	23.6973
Q2FYF4	Q2FYF4	SAOUHSC_01497		Completeproteome;Hydrolase;Referenceproteome	35.578	9	42.5	1447800000	102	+	2.82094	-0.484886	0.00107519	24.066	23.9455	24.1673	23.9316	24.4234	24.6778	24.5693	24.3793
Q2FYF5	Q2FYF5	SAOUHSC_01496	(d)CMP kinase	ATP-binding;Completeproteome;Kinase;Nucleotide-binding;Referenceproteome;Transferase	20.977	18	69.9	4495900000	220	+	2.3701	-0.348628	0.00261585	24.5494	24.8289	24.7225	24.7146	25.1318	25.1368	25.0273	24.914
Q2FYF9	Q2FYF9	SAOUHSC_01493		Completeproteome;Referenceproteome;Ribonucleoprotein;Ribosomalprotein	43.287	34	85.9	61809000000	722	+	1.48818	-0.226728	0.0154243	28.0602	28.1873	28.0119	27.9928	28.492	28.2659	28.2081	28.193
Q2FYG0;REV__Q2G0P7	Q2FYG0	der	GTPase Der	Completeproteome;GTP-binding;Nucleotide-binding;Referenceproteome;Repeat;Ribosomebiogenesis	48.979	37	68.6	39375000000	722	+	2.91222	0.365146	0.000685039	26.8416	27.0002	27.025	27.0074	26.4792	26.6074	26.6176	26.7094
Q2FYG1	Q2FYG1	gpsA	Glycerol-3-phosphate dehydrogenase [NAD(P)+]	Completeproteome;Cytoplasm;Lipidbiosynthesis;Lipidmetabolism;NAD;Oxidoreductase;Phospholipidbiosynthesis;Phospholipidmetabolism;Referenceproteome	36.071	28	74.7	10952000000	451	+	1.55236	0.220914	0.0137099	25.4151	25.6521	25.6046	25.7698	25.4484	25.3899	25.3633	25.3564
Q2FYG2	Q2FYG2	SAOUHSC_01490		Completeproteome;DNA-binding;DNAcondensation;Referenceproteome	9.6259	23	95.6	198450000000	828	+	4.20225	-0.692904	0.000288136	29.6392	29.4659	29.3374	29.4621	30.2596	30.1416	30.1706	30.1045
Q2FYG4	Q2FYG4	SAOUHSC_01488		Completeproteome;Referenceproteome	22.184	8	34.7	1772700000	112		0.215478	0.10165	0.420976	23.4927	23.3445	23.7862	23.942	23.392	23.2733	23.6333	23.86
Q2FYG5	Q2FYG5	SAOUHSC_01487		Completeproteome;Methyltransferase;Referenceproteome;S-adenosyl-L-methionine;Transferase	22.371	11	61.5	7266200000	119		0.331237	-0.043004	0.289507	26.9182	27.155	27.0839	27.0035	27.0362	27.1347	27.0971	27.0646
Q2FYG6	Q2FYG6	SAOUHSC_01486		Completeproteome;Isoprenebiosynthesis;Referenceproteome;Transferase	35.585	13	38.5	2668200000	210		0.61622	-0.192791	0.127716	23.5707	24.0465	23.909	23.9263	23.9256	23.8754	24.0671	24.3556
Q2FYG7	Q2FYG7	ndk	Nucleoside diphosphate kinase	ATP-binding;Completeproteome;Cytoplasm;Kinase;Magnesium;Metal-binding;Nucleotide-binding;Nucleotidemetabolism;Phosphoprotein;Referenceproteome;Transferase	16.575	14	63.1	55904000000	364	+	2.89793	-1.01548	0.000796875	28.2241	28.1761	28.3125	27.5514	28.966	29.098	29.1422	29.1197
Q2FYG9	Q2FYG9	aroC	Chorismate synthase	Amino-acidbiosynthesis;Aromaticaminoacidbiosynthesis;Completeproteome;FAD;Flavoprotein;FMN;Lyase;NADP;Referenceproteome	43.046	15	46.4	3979700000	260	+	4.02355	-0.639076	0.000449275	23.6695	23.7403	23.4953	23.7252	24.2215	24.4058	24.3133	24.2458
Q2FYH0	Q2FYH0	aroB	3-dehydroquinate synthase	Amino-acidbiosynthesis;Aromaticaminoacidbiosynthesis;Cobalt;Completeproteome;Cytoplasm;Lyase;NAD;Referenceproteome;Zinc	40.299	7	27.1	704430000	64	+	3.62392	-0.835802	0.000521739	21.3211	21.7281	21.7853	21.7152	22.4657	22.4468	22.513	22.4675
Q2FYH2	Q2FYH2	SAOUHSC_01480		Completeproteome;Referenceproteome	43.021	4	15.5	740610000	69	+	3.07838	-0.878956	0.00062931	22.2666	22.7071	22.191	22.3384	23.045	23.4336	23.3411	23.1993
Q2FYH5	Q2FYH5	dinG	Probable ATP-dependent helicase DinG homolog	ATP-binding;Completeproteome;DNA-binding;DNAdamage;DNArecombination;DNArepair;Helicase;Hydrolase;Nucleotide-binding;Referenceproteome	104.22	10	14.4	465210000	37	+	4.70792	-0.8551	0	21.499	21.6066	21.5355	21.4591	22.5265	22.3316	22.4309	22.2316
Q2FYH6	Q2FYH6	asnS	Asparagine--tRNA ligase	Aminoacyl-tRNAsynthetase;ATP-binding;Completeproteome;Cytoplasm;Ligase;Nucleotide-binding;Proteinbiosynthesis;Referenceproteome	49.157	43	77.2	79380000000	907	+	3.8059	0.270008	0.000397436	28.5606	28.4901	28.6073	28.5527	28.2839	28.2931	28.3283	28.2254
Q2FYH7	Q2FYH7	SAOUHSC_01470		Completeproteome;Referenceproteome	26.955	6	36	1177700000	87	+	1.37575	-0.190981	0.0197679	23.0535	22.9359	23.0006	23.0805	23.0769	23.118	23.362	23.2775
Q2FYH8	Q2FYH8	nth	Endonuclease III	4Fe-4S;Completeproteome;DNA-binding;DNAdamage;DNArepair;Endonuclease;Glycosidase;Hydrolase;Iron;Iron-sulfur;Lyase;Metal-binding;Nuclease;Referenceproteome	25.234	5	32.4	164730000	25		0.14294	-0.177376	0.542114	21.7251	21.0983	21.3351	19.5914	21.2793	20.9705	21.1014	21.1082
Q2FYH9	Q2FYH9	SAOUHSC_01468		Completeproteome;Referenceproteome	13.672	7	72.6	625930000	48		0.384954	-0.206362	0.245981	22.8837	23.3192	22.9413	22.2435	23.2202	22.9646	22.9093	23.1191
Q2FYI0	Q2FYI0	SAOUHSC_01467		Completeproteome;Referenceproteome	80.425	66	80.6	31567000000	1277		0.168438	-0.0280361	0.492858	26.6798	26.7543	26.632	26.5562	26.6951	26.7653	26.7314	26.5425
Q2FYI1	Q2FYI1	recU	Holliday junction resolvase RecU	Completeproteome;Cytoplasm;DNAdamage;DNArecombination;DNArepair;Endonuclease;Hydrolase;Magnesium;Metal-binding;Nuclease;Referenceproteome	26.477	9	45.8	315360000	20		0.148771	-0.0665607	0.529657	22.1313	22.2348	22.4575	21.9549	22.2098	21.9075	22.5248	22.4026
Q2FYI3	Q2FYI3	SAOUHSC_01464		Completeproteome;Referenceproteome	13.782	5	54.3	363100000	43	+	1.30274	0.398304	0.0233994	22.1199	21.9722	22.3409	22.3469	22.067	21.6518	21.4935	21.9745
Q2FYI4	Q2FYI4	SAOUHSC_01463	UPF0398 protein SAOUHSC_01463	Completeproteome;Referenceproteome	22.191	3	26.2	42944000	10		0.0615215	-0.0432658	0.75227	20.4081	19.5937	20.4864	19.9626	20.4279	20.216	20.2072	19.7729
Q2FYI5	Q2FYI5	gpsB	Cell cycle protein GpsB	Cellcycle;Celldivision;Cellshape;Coiledcoil;Completeproteome;Cytoplasm;Referenceproteome	13.151	17	99.1	27551000000	450	+	2.3557	0.3334	0.00259215	26.8691	27.1376	26.9085	27.0138	26.6087	26.7429	26.7013	26.5426
Q2FYI6	Q2FYI6	SAOUHSC_01460		Completeproteome;Methyltransferase;Referenceproteome;Transferase	43.333	20	44.1	7556700000	232	+	3.33762	0.604452	0.000581281	25.9588	25.8874	26.0745	25.9109	25.1884	25.3733	25.2971	25.5551
Q2FYI7	Q2FYI7	SAOUHSC_01459		Completeproteome;Referenceproteome	12.316	4	46.4	757360000	38	+	2.72226	1.00053	0.00135242	24.2271	24.4611	23.8885	24.1972	23.3067	23.2151	22.7748	23.4751
Q2FYI9	Q2FYI9	SAOUHSC_01456		Completeproteome;Referenceproteome	50.201	7	16.8	1247800000	68	+	1.23557	-0.51403	0.0272174	22.9855	22.0324	22.7027	22.5791	22.8778	23.1727	23.0079	23.2974
Q2FYJ0	Q2FYJ0	SAOUHSC_01455		Completeproteome;Referenceproteome	133.11	43	45.1	7600700000	398	+	3.93378	-0.384057	0.000420339	24.1348	24.2737	24.2332	24.1702	24.529	24.6671	24.5537	24.5983
Q2FYJ1	Q2FYJ1	SAOUHSC_01454		Completeproteome;DNA-binding;Hydrolase;Nuclease;Referenceproteome	33.401	16	58.2	3414100000	177	+	1.6009	-0.20797	0.0118874	24.024	24.1925	24.1745	24.0447	24.4579	24.2528	24.2099	24.3471
Q2FYJ2	Q2FYJ2	ald1	Alanine dehydrogenase 1	Completeproteome;NAD;Oxidoreductase;Referenceproteome	40.224	39	55.1	46632000000	782	+	1.3763	0.301334	0.0197344	28.3034	28.5443	28.4381	28.0773	28.2063	28.0098	27.9235	28.0182
Q2FYJ3	Q2FYJ3	tdcB	L-threonine dehydratase catabolic TdcB	Allostericenzyme;Completeproteome;Lyase;Nucleotide-binding;Pyridoxalphosphate;Referenceproteome	37.305	35	67.3	83894000000	969		0.777514	0.239129	0.0844197	28.795	29.3409	29.228	28.8039	28.9659	28.7324	28.7511	28.7618
Q2FYJ4	Q2FYJ4	SAOUHSC_01450		Completeproteome;Membrane;Referenceproteome;Transmembrane	47.261	4	9.5	492000000	35		0.184067	0.0955839	0.465837	23.1727	23.3389	23.6725	22.9671	23.5573	23.1606	22.8869	23.1641
Q2FYJ7	Q2FYJ7	SAOUHSC_01443		Completeproteome;Referenceproteome	15.354	4	34.6	287240000	23		0.0876236	0.190183	0.669684	23.1886	22.7698	22.1913	22.0753	23.2727	20.1416	23.0247	23.0253
Q2FYK0	Q2FYK0	SAOUHSC_01440		Completeproteome;Referenceproteome	26.031	2	9	126480000	18	+	1.00754	-0.457895	0.047644	20.9887	21.1692	21.1556	21.3485	21.5205	21.6948	22.1762	21.1021
Q2FYK2	Q2FYK2	SAOUHSC_01438		Completeproteome;Referenceproteome	9.4065	8	100	6100200000	195	+	3.25649	0.616583	0.000553991	26.1791	26.147	26.0268	25.8067	25.4663	25.5061	25.3812	25.3397
Q2FYK3	Q2FYK3	cvfC	Conserved virulence factor C	Completeproteome;Referenceproteome;Virulence	42.923	17	56.1	4369200000	163	+	4.9323	1.14175	0	26.9048	27.1625	26.9356	26.9771	25.9741	25.858	25.6737	25.9072
Q2FYK4	Q2FYK4	SAOUHSC_01436	UPF0403 protein SAOUHSC_01436	Completeproteome;Referenceproteome	16.014	6	33.1	2947900000	119	+	2.76225	0.599846	0.0012967	25.2666	25.3165	25.4998	24.9773	24.7165	24.59	24.7016	24.6528
Q2FYK5	Q2FYK5	thyA	Thymidylate synthase	Completeproteome;Cytoplasm;Methyltransferase;Nucleotidebiosynthesis;Referenceproteome;Transferase	36.839	15	57.5	4598400000	172	+	1.2388	0.206648	0.0270337	25.2749	25.2664	25.0273	25.068	24.9436	25.124	24.8808	24.8617
Q2FYK6	Q2FYK6	SAOUHSC_01434	Dihydrofolate reductase	Completeproteome;NADP;One-carbonmetabolism;Oxidoreductase;Referenceproteome	18.251	11	61.6	11876000000	285	+	2.42551	-0.418099	0.00215336	25.3223	25.6155	25.6691	25.6868	25.9192	25.9591	26.0192	26.0685
Q2FYK7	Q2FYK7	SAOUHSC_01433		Completeproteome;Lipid-binding;Referenceproteome	30.644	17	54.5	15824000000	337	+	2.11221	-0.418179	0.00432133	26.0552	26.4783	26.3409	26.4115	26.607	26.8407	26.7982	26.7128
Q2FYL0	Q2FYL0	SAOUHSC_01430		Completeproteome;Kinase;Phosphotransferasesystem;Referenceproteome;Sugartransport;Transferase;Transport	17.96	16	75.3	22529000000	324	+	1.16034	-0.269891	0.032272	26.5446	26.6621	26.4002	26.3213	27.0287	26.7322	26.6305	26.6164
Q2FYL1	Q2FYL1	SAOUHSC_01429	UPF0346 protein SAOUHSC_01429	Completeproteome;Referenceproteome	8.8697	1	19.2	199450000	10	+	1.13335	0.506243	0.0346553	22.483	22.6928	22.1619	21.6851	21.6991	21.7953	21.9445	21.5589
Q2FYL3	Q2FYL3	SAOUHSC_01427		Completeproteome;Hydrolase;Protease;Referenceproteome;Serineprotease	55.26	25	62.7	1940800000	215	+	4.02444	-0.998964	0.000450909	22.2286	22.2287	22.4472	21.9418	23.2522	23.2111	23.1159	23.263
Q2FYL4	Q2FYL4	SAOUHSC_01425		Completeproteome;Referenceproteome	19.846	6	45.6	1460300000	106	+	2.71622	0.631986	0.00134759	24.655	24.2037	24.2497	24.1746	23.5929	23.6572	23.7086	23.7963
Q2FYL5	Q2FYL5	murG	UDP-N-acetylglucosamine--N-acetylmuramyl-(pentapeptide) pyrophosphoryl-undecaprenol N-acetylglucosamine transferase	Cellcycle;Celldivision;Cellmembrane;Cellshape;Cellwallbiogenesis/degradation;Completeproteome;Glycosyltransferase;Membrane;Peptidoglycansynthesis;Referenceproteome;Transferase	39.696	33	80.9	12164000000	473	+	2.69943	-0.751618	0.00133333	26.1016	26.733	26.5035	26.6134	27.3516	27.2148	27.2573	27.1343
Q2FYM1	Q2FYM1	odhA	2-oxoglutarate dehydrogenase E1 component	Completeproteome;Glycolysis;Oxidoreductase;Referenceproteome;Thiaminepyrophosphate	105.34	61	61.7	23601000000	854	+	4.81878	-0.80689	0	26.1152	26.0497	26.0026	26.0049	26.702	26.8959	26.9769	26.8252
Q2FYM2	Q2FYM2	odhB	Dihydrolipoyllysine-residue succinyltransferase component of 2-oxoglutarate dehydrogenase complex	Acyltransferase;Completeproteome;Lipoyl;Referenceproteome;Transferase;Tricarboxylicacidcycle	46.673	28	52.6	17803000000	344	+	5.63918	-0.914	0	26.2985	26.3772	26.2945	26.2044	27.1246	27.2809	27.2662	27.1589
Q2FYM3	Q2FYM3	SAOUHSC_01415		Completeproteome;Referenceproteome	30.084	11	62.8	4741600000	146		0.659034	0.182102	0.113396	25.9321	26.2497	25.914	25.9674	25.9598	25.9637	25.5166	25.8947
Q2FYM7	Q2FYM7	SAOUHSC_01408	TelA-like protein SAOUHSC_01408	Completeproteome;Referenceproteome	43.407	35	89.4	12484000000	479	+	1.14481	0.162811	0.0334566	25.844	26.1194	25.9753	26.0503	25.7264	25.9259	25.7938	25.8916
Q2FYM8	Q2FYM8	SAOUHSC_01407		Completeproteome;Referenceproteome	24.702	7	27.3	213550000	41		0.0537568	-0.022933	0.777121	21.1763	21.3951	21.2737	21.4337	21.164	21.1708	21.7483	21.2875
Q2FYM9	Q2FYM9	acyP	Acylphosphatase	Completeproteome;Hydrolase;Referenceproteome	10.16	7	97.8	2278600000	165		0.585839	0.129344	0.138711	24.1416	23.9418	23.9	24.0155	23.9608	24.0686	23.7842	23.6681
Q2FYN2	Q2FYN2	cspA	Cold shock protein CspA	Completeproteome;Cytoplasm;Referenceproteome	7.321	5	100	14428000000	152		0.061164	-0.03198	0.752136	28.6584	28.1582	28.0775	28.1735	28.6701	28.1803	28.2684	28.0766
Q2FYN4	Q2FYN4	lysA	Diaminopimelate decarboxylase	Amino-acidbiosynthesis;Completeproteome;Decarboxylase;Lyase;Lysinebiosynthesis;Pyridoxalphosphate;Referenceproteome	47.034	15	35.6	2707300000	215	+	3.51502	-0.59365	0.000487805	23.3044	23.2129	23.3091	23.1188	23.7358	23.7502	23.8122	24.0217
Q2FYN6	Q2FYN6	SAOUHSC_01399	Uncharacterized hydrolase SAOUHSC_01399	Completeproteome;Hydrolase;Referenceproteome	43.143	8	27.9	354790000	19		0.409863	-0.707143	0.230392	21.9964	20.0013	23.206	23.0894	23.0549	22.4729	22.4957	23.0982
Q2FYN7	Q2FYN7	dapH	2.3.4.5-tetrahydropyridine-2.6-dicarboxylate N-acetyltransferase	Acyltransferase;Amino-acidbiosynthesis;Completeproteome;Diaminopimelatebiosynthesis;Lysinebiosynthesis;Referenceproteome;Repeat;Transferase	25.258	10	43.5	931040000	83	+	3.95048	-1.76315	0.000424658	21.3577	22.172	21.6912	21.6457	23.6757	23.4975	23.5567	23.1893
Q2FYP0	Q2FYP0	asd	Aspartate-semialdehyde dehydrogenase	Amino-acidbiosynthesis;Completeproteome;Diaminopimelatebiosynthesis;Lysinebiosynthesis;Methioninebiosynthesis;NADP;Oxidoreductase;Referenceproteome;Threoninebiosynthesis	36.283	13	45.6	1133100000	114	+	3.95542	-0.860523	0.000427586	22.5762	22.2004	22.5329	22.5983	23.3203	23.2744	23.3819	23.3733
Q2FYP2	Q2FYP2	SAOUHSC_01392		ATP-binding;Completeproteome;Nucleotide-binding;Referenceproteome	60.256	47	72.8	27049000000	697	+	6.67701	-1.22195	0	25.5732	25.6267	25.6491	25.4625	26.7613	26.8096	26.8565	26.7719
Q2FYP3	Q2FYP3	cvfB	Conserved virulence factor B	Completeproteome;Referenceproteome;Virulence	34.198	22	67.7	15044000000	412		0.830035	-0.0712852	0.0740985	25.5821	25.7032	25.7025	25.6782	25.6823	25.7376	25.8272	25.7041
Q2FYQ2	Q2FYQ2	SAOUHSC_01383		Completeproteome;Referenceproteome	69.284	23	53.3	5408000000	299	+	2.86904	-0.345354	0.000784615	24.9261	24.925	24.8076	24.7194	25.1658	25.1007	25.2378	25.2553
Q2FYQ3	Q2FYQ3	SAOUHSC_01382		Completeproteome;Referenceproteome	13.657	2	11.4	78269000	10	+	2.82992	-1.47909	0.000901515	20.4152	19.3341	19.8926	19.5751	21.2957	20.9299	21.3491	21.5586
Q2FYQ9	Q2FYQ9	SAOUHSC_01376		Completeproteome;Referenceproteome	18.459	3	18.5	500140000	41	+	4.66252	-1.59027	0	21.2814	21.2875	21.0966	21.4337	22.5352	22.9872	23.0505	22.8873
Q2FYR1	Q2FYR1	femB	Aminoacyltransferase FemB	Acyltransferase;Antibioticresistance;Cellshape;Cellwallbiogenesis/degradation;Completeproteome;Cytoplasm;Peptidoglycansynthesis;Referenceproteome;Transferase	49.675	18	46.3	11462000000	361	+	1.73652	0.202714	0.0088134	26.1004	26.3016	26.1607	26.1863	25.8993	26.009	26.1066	25.9233
Q2FYR2	Q2FYR2	femA	Aminoacyltransferase FemA	Acyltransferase;Antibioticresistance;Cellshape;Cellwallbiogenesis/degradation;Completeproteome;Cytoplasm;Directproteinsequencing;Peptidoglycansynthesis;Referenceproteome;Transferase	49.123	21	54	6079300000	249	+	1.8698	0.222003	0.0066383	25.6097	25.4245	25.3407	25.3983	25.1812	25.1681	25.2736	25.2623
Q2FYS0	Q2FYS0	SAOUHSC_01365		Completeproteome;Referenceproteome	37.855	17	45.5	4712900000	291	+	5.35806	-0.859162	0	24.5143	24.5537	24.6638	24.7193	25.4896	25.5413	25.4155	25.4414
Q2FYS4	Q2FYS4	parC	DNA topoisomerase 4 subunit A	Antibioticresistance;Cellmembrane;Completeproteome;DNA-binding;Isomerase;Membrane;Referenceproteome;Topoisomerase	90.997	48	56.5	15767000000	936	+	2.77517	-0.398145	0.00113124	25.1936	25.2062	25.3792	25.1498	25.4881	25.6193	25.6697	25.7443
Q2FYS5	Q2FYS5	parE	DNA topoisomerase 4 subunit B	ATP-binding;Completeproteome;DNA-binding;Isomerase;Magnesium;Metal-binding;Nucleotide-binding;Referenceproteome;Topoisomerase	74.363	44	46	13451000000	679	+	2.48295	-0.393065	0.00204831	25.0174	25.2638	25.2638	25.2525	25.4375	25.5793	25.6546	25.6984
Q2FYS6	Q2FYS6	plsY	Glycerol-3-phosphate acyltransferase	Cellmembrane;Completeproteome;Lipidbiosynthesis;Lipidmetabolism;Membrane;Phospholipidbiosynthesis;Phospholipidmetabolism;Referenceproteome;Transferase;Transmembrane;Transmembranehelix	22.263	3	11.9	568200000	43		0.572487	-0.215746	0.143831	21.9149	22.5404	22.5393	22.3893	22.6536	22.5136	22.763	22.3168
Q2FYS7	Q2FYS7	SAOUHSC_01349	Uncharacterized protein SAOUHSC_01349	Completeproteome;Referenceproteome	11.496	6	52	1612900000	60	+	3.52907	-0.721717	0.000491803	24.4764	24.3309	24.312	24.2383	24.9121	25.2946	24.9896	25.048
Q2FYS8	Q2FYS8	SAOUHSC_01348		Completeproteome;Referenceproteome	18.175	14	71	3547400000	132	+	2.11483	0.491653	0.00426075	24.6427	24.2919	24.6458	24.4573	23.7862	23.9644	24.2043	24.1162
Q2FYS9	Q2FYS9	SAOUHSC_01347	Aconitate hydratase	4Fe-4S;Completeproteome;Iron;Iron-sulfur;Lyase;Metal-binding;Referenceproteome	98.968	67	61.7	55974000000	1302	+	3.45996	-0.341327	0.00046875	27.1948	27.1424	27.1016	27.0003	27.4548	27.484	27.4798	27.3858
Q2FYT0	Q2FYT0	SAOUHSC_01346		Cellmembrane;Completeproteome;Membrane;Referenceproteome;Transmembrane;Transmembranehelix;Transport	60.471	11	10	8920300000	233		0.0437545	0.0144401	0.814267	26.297	26.5346	26.7017	26.4672	26.4461	26.7104	26.4443	26.3419
Q2FYT3;Q2FYT2	Q2FYT3	SAOUHSC_01343;sbcC	Nuclease SbcCD subunit C	ATP-binding;Coiledcoil;Completeproteome;DNAdamage;DNArecombination;DNArepair;DNAreplication;Endonuclease;Exonuclease;Hydrolase;Nuclease;Nucleotide-binding;Referenceproteome;SOSresponse	117.27	24	36.7	2726200000	143	+	1.79821	0.274149	0.00795599	24.9985	25.2235	25.0474	25.0878	24.6708	24.7456	24.8723	24.9721
Q2FYT4	Q2FYT4	sbcD	Nuclease SbcCD subunit D	Completeproteome;DNAdamage;DNArecombination;DNArepair;DNAreplication;Endonuclease;Exonuclease;Hydrolase;Nuclease;Referenceproteome;SOSresponse	42.935	7	21.7	287470000	42	+	1.66059	0.600731	0.0106145	22.6511	22.2919	22.3569	22.0726	21.995	21.7281	21.9356	21.3109
Q2FYT7	Q2FYT7	SAOUHSC_01338	UPF0154 protein SAOUHSC_01338	Cellmembrane;Completeproteome;Membrane;Referenceproteome;Transmembrane;Transmembranehelix	11.024	9	56.8	13992000000	120		0.349122	0.173783	0.273725	25.7528	26.4115	26.6305	26.3545	26.0023	25.895	26.2034	26.3534
Q2FYT8	Q2FYT8	SAOUHSC_01337		Completeproteome;Magnesium;Metal-binding;Referenceproteome;Thiaminepyrophosphate;Transferase	68.359	87	98.7	374100000000	2514	+	3.97685	0.372503	0.000435088	30.3074	30.4383	30.3041	30.3926	29.9746	30.0602	29.9449	29.9727
Q2FYT9	Q2FYT9	SAOUHSC_01336	UPF0291 protein SAOUHSC_01336	Completeproteome;Cytoplasm;Referenceproteome	9.2033	10	81	4012000000	164	+	3.20401	0.347405	0.000672811	25.4081	25.3896	25.4319	25.3003	25.0372	24.9074	25.1029	25.0929
Q2FYU1	Q2FYU1	lexA	LexA repressor	Autocatalyticcleavage;Completeproteome;DNA-binding;DNAdamage;DNArepair;DNAreplication;Hydrolase;Referenceproteome;Repressor;SOSresponse;Transcription;Transcriptionregulation	23.301	13	61.4	5396800000	247	+	2.27163	-0.0685883	0.00265109	24.8851	24.8843	24.8834	24.8744	24.9051	24.9668	24.9771	24.9525
Q2FYU2	Q2FYU2	SAOUHSC_01332		Completeproteome;Referenceproteome	33.59	5	22.6	56216000	6		0.154235	0.276569	0.520611	21.2763	21.1591	20.736	20.4029	22.0345	20.4849	18.8966	21.052
Q2FYU4	Q2FYU4	guaC	GMP reductase	Completeproteome;NADP;Oxidoreductase;Referenceproteome	36.116	17	64.3	1163100000	57	+	5.7574	-3.00591	0	22.0822	21.8448	21.6232	22.2048	24.926	25.0368	24.6686	25.1473
Q2FYU5	Q2FYU5	rpsN	30S ribosomal protein S14	Completeproteome;Referenceproteome;Ribonucleoprotein;Ribosomalprotein;RNA-binding;rRNA-binding	10.54	7	52.8	410560000	39	+	1.38996	-0.518743	0.0189958	22.2273	22.2547	22.4519	22.2096	23.3514	22.7023	22.7093	22.4554
Q2FYU6	Q2FYU6	rpmG1	50S ribosomal protein L33 1	Completeproteome;Referenceproteome;Ribonucleoprotein;Ribosomalprotein	5.9318	5	42.9	32333000000	162	+	1.21892	-0.312231	0.028318	28.124	27.6951	27.5228	27.642	28.145	28.0385	27.9844	28.0649
Q2FYU7	Q2FYU7	katA	Catalase	Completeproteome;Heme;Hydrogenperoxide;Iron;Metal-binding;Oxidoreductase;Peroxidase;Referenceproteome	58.379	45	70.1	57770000000	835	+	5.48866	-0.861923	0	26.6415	26.7167	26.6216	26.5531	27.4181	27.5871	27.5375	27.4379
Q2FYU8	Q2FYU8	SAOUHSC_01326		Completeproteome;Membrane;Referenceproteome;Transmembrane	53.412	1	3.5	608900000	11		0.321454	0.75754	0.299411	23.4901	23.6137	23.5744	23.5426	19.815	24.0449	23.7436	23.5871
Q2FYV0	Q2FYV0	SAOUHSC_01324		Completeproteome;Referenceproteome	12.284	4	26	168400000	14		0.544742	-0.81646	0.155702	21.4599	22.0655	19.1394	21.5179	22.4298	22.1318	21.4311	21.4558
Q2FYV1	Q2FYV1	SAOUHSC_01323		Completeproteome;Referenceproteome	29.821	11	40.4	7299000000	195		0.863284	-0.160602	0.0686598	25.5277	25.7277	25.7128	25.8711	26.0528	25.8101	25.7843	25.8345
Q2FYV3	Q2FYV3	SAOUHSC_01321	Threonine synthase	Amino-acidbiosynthesis;Completeproteome;Lyase;Pyridoxalphosphate;Referenceproteome;Threoninebiosynthesis	37.869	13	47.9	943040000	119	+	3.51705	-0.432515	0.000490463	23.2881	23.4287	23.3159	23.4091	23.7212	23.7306	23.7957	23.9244
Q2FYV4	Q2FYV4	SAOUHSC_01320	Homoserine dehydrogenase	Amino-acidbiosynthesis;Branched-chainaminoacidbiosynthesis;Completeproteome;Isoleucinebiosynthesis;Methioninebiosynthesis;NADP;Oxidoreductase;Referenceproteome;Threoninebiosynthesis	46.873	11	29.8	1953200000	62	+	1.23171	-0.517589	0.0275933	24.8034	25.2241	25.6343	25.6101	25.9201	25.8973	25.5262	25.9987
Q2FYV6	Q2FYV6	SAOUHSC_01318		Completeproteome;Referenceproteome	22.751	4	28.3	118470000	14	+	1.58391	-1.21447	0.012553	20.6878	20.2338	21.3054	20.9771	22.9821	21.9276	21.3475	21.8047
Q2FYV7	Q2FYV7	SAOUHSC_01317		Completeproteome;Referenceproteome	32.851	27	81	11148000000	654		0.122969	0.018589	0.583617	25.9642	26.1607	25.9577	25.9657	26.0513	26.0259	25.9345	25.9623
Q2FYV8	Q2FYV8	SAOUHSC_01316		Completeproteome;Referenceproteome	20.328	16	79.1	3114800000	222	+	3.80553	-0.856182	0.000396166	22.727	22.8383	23.1162	23.0361	23.651	23.8442	23.874	23.7731
Q2FYW0	Q2FYW0	SAOUHSC_01314		Completeproteome;DNA-binding;Referenceproteome;Transcription;Transcriptionregulation	22.783	3	25	203440000	15		0.094355	-0.135014	0.653849	21.2013	20.2942	22.5685	22.142	21.3823	21.6035	21.9665	21.7936
Q2FYW4	Q2FYW4	SAOUHSC_01310	Cardiolipin synthase	Cellmembrane;Completeproteome;Lipidbiosynthesis;Lipidmetabolism;Membrane;Phospholipidbiosynthesis;Phospholipidmetabolism;Referenceproteome;Repeat;Transferase;Transmembrane;Transmembranehelix	56.365	16	42.2	1117700000	136	+	1.58818	-0.534482	0.0122998	22.4184	23.1951	22.921	22.7492	23.5651	23.3527	23.332	23.1718
Q2FYW7	Q2FYW7	SAOUHSC_01306		Completeproteome;Referenceproteome	7.1932	1	19	44133000	12	+	1.90608	-0.929993	0.00626986	19.8314	19.3255	20.3487	19.8517	21.1017	20.3683	20.9396	20.6678
Q2FYX6	Q2FYX6	SAOUHSC_01297		Completeproteome;Referenceproteome	9.5067	4	35.4	142270000	16	+	3.58339	-1.27359	0.000508475	20.9965	20.6956	20.376	20.3359	22.0091	21.9462	21.739	21.804
Q2FYY1	Q2FYY1	SAOUHSC_01292		Completeproteome;Referenceproteome	7.1001	4	82	277560000	17	+	1.78675	-2.28553	0.00808242	22.0187	19.1716	21.7448	21.9157	23.6128	23.2111	23.7275	23.4415
Q2FYY3	Q2FYY3	SAOUHSC_01290		Completeproteome;Referenceproteome	7.864	4	55.9	145060000	24	+	2.72655	-1.01047	0.0012711	20.2966	20.754	20.1269	20.3305	21.1092	21.5186	21.2142	21.7078
Q2FYY6	Q2FYY6	SAOUHSC_01287	Glutamine synthetase	ATP-binding;Completeproteome;Ligase;Nucleotide-binding;Referenceproteome	50.84	60	86.8	229500000000	1195	+	3.74009	-0.463058	0.000383901	30.253	30.5108	30.3875	30.3887	30.8352	30.9088	30.8108	30.8375
Q2FYY7	Q2FYY7	SAOUHSC_01285		Completeproteome;DNA-binding;Referenceproteome	14.276	10	78.7	547270000	61	+	2.09769	-0.64187	0.00429161	22.0864	22.5286	22.7687	22.6739	22.961	23.2106	23.2095	23.2439
Q2FYY8	Q2FYY8	SAOUHSC_01284		Completeproteome;Referenceproteome	45.487	11	36.7	4234400000	77	+	2.65658	-0.84094	0.00138832	25.0444	25.4704	25.5856	25.1331	26.1289	26.1962	25.8924	26.3799
Q2FYY9	Q2FYY9	hflX	GTPase HflX	Completeproteome;Cytoplasm;GTP-binding;Magnesium;Metal-binding;Nucleotide-binding;Referenceproteome	47.335	11	38.1	919970000	90	+	1.73669	-0.465419	0.00882395	22.2701	22.1145	22.1408	22.1402	22.5179	22.2982	22.7756	22.9356
Q2FYZ0	Q2FYZ0	SAOUHSC_01282	Glutathione peroxidase	Completeproteome;Oxidoreductase;Peroxidase;Referenceproteome	18.117	14	55.1	15445000000	389	+	3.16244	-0.447861	0.000654709	25.4187	25.5862	25.5969	25.729	25.9737	26.0713	25.9872	26.09
Q2FYZ2	Q2FYZ2	miaA	tRNA dimethylallyltransferase	ATP-binding;Completeproteome;Magnesium;Nucleotide-binding;Referenceproteome;Transferase;tRNAprocessing	35.868	9	50.5	461210000	50	+	2.23499	-0.859906	0.003099	21.6322	21.9908	21.6064	22.469	22.7363	22.9082	22.7374	22.756
Q2FYZ3	Q2FYZ3	SAOUHSC_01279		Completeproteome;Hydrolase;Referenceproteome	35.255	3	13.2	566840000	31	+	1.137	-1.37527	0.0342868	20.2076	22.3878	23.107	22.0756	23.5099	23.5744	23.226	22.9688
Q2FYZ4	Q2FYZ4	glpD	Aerobic glycerol-3-phosphate dehydrogenase	Completeproteome;Cytoplasm;FAD;Flavoprotein;Glycerolmetabolism;Oxidoreductase;Referenceproteome	62.387	75	75.6	120160000000	1732		0.206274	0.0632401	0.433443	28.1115	28.4803	28.2643	27.9325	28.204	28.0428	28.111	28.1778
Q2FYZ5	Q2FYZ5	glpK	Glycerol kinase	ATP-binding;Completeproteome;Glycerolmetabolism;Kinase;Nucleotide-binding;Phosphoprotein;Referenceproteome;Transferase	55.625	49	72.1	43237000000	770	+	6.62644	-1.78254	0	25.7105	25.8288	25.7926	25.5572	27.4654	27.5053	27.6029	27.4455
Q2FYZ6	Q2FYZ6	SAOUHSC_01275		Completeproteome;Membrane;Referenceproteome;Transmembrane;Transport	28.115	4	12.1	1348800000	65	+	4.58741	-1.73654	0	22.5798	23.0044	22.3711	22.7868	24.5881	24.4601	24.2933	24.3468
Q2FYZ7	Q2FYZ7	SAOUHSC_01274	Glycerol uptake operon antiterminator regulatory protein	Completeproteome;Glycerolmetabolism;Referenceproteome;RNA-binding;Transcription;Transcriptionregulation	20.45	10	66.7	3947600000	147	+	1.2669	-0.750049	0.0250854	22.8735	24.1004	23.8915	24.1134	24.1845	24.6522	24.63	24.5123
Q2FYZ9	Q2FYZ9	mutS	DNA mismatch repair protein MutS	ATP-binding;Completeproteome;DNA-binding;DNAdamage;DNArepair;Nucleotide-binding;Referenceproteome	99.902	46	55.6	9343600000	439		0.32986	0.0492172	0.290074	24.5198	24.4939	24.5008	24.4778	24.2902	24.4054	24.5473	24.5526
Q2FZ01	Q2FZ01	SAOUHSC_01270		Completeproteome;Referenceproteome	14.15	5	49.6	308020000	28	+	1.26488	-0.226398	0.0251051	21.7097	22.023	21.7	21.7439	22.049	22.1643	21.9553	21.9136
Q2FZ02	Q2FZ02	miaB	tRNA-2-methylthio-N(6)-dimethylallyladenosine synthase	4Fe-4S;Completeproteome;Cytoplasm;Iron;Iron-sulfur;Metal-binding;Referenceproteome;S-adenosyl-L-methionine;Transferase;tRNAprocessing	58.931	19	42.4	3389600000	218	+	1.87687	0.197201	0.0065213	24.2218	24.3929	24.4543	24.3088	24.1964	24.184	24.1204	24.0881
Q2FZ03	Q2FZ03	SAOUHSC_01268		Completeproteome;Referenceproteome	11.035	4	59.8	2818900000	87		0.628995	-0.171295	0.123591	24.9972	24.8959	25.0322	24.5063	25.1095	24.8909	25.059	25.0574
Q2FZ04	Q2FZ04	SAOUHSC_01267		Completeproteome;Referenceproteome	31.359	15	75	3612400000	215		0.00984599	-0.00149393	0.956075	24.147	24.1586	24.0513	24.1797	24.1039	24.2618	24.0795	24.0975
Q2FZ05	Q2FZ05	SAOUHSC_01266		Completeproteome;Referenceproteome	64.555	25	50	6960100000	368		0.597395	-0.0770459	0.135237	24.7265	24.7648	24.7032	24.5889	24.6414	24.7665	24.857	24.8267
Q2FZ06	Q2FZ06	SAOUHSC_01265		Completeproteome;Referenceproteome	29.875	28	86.8	7528100000	378	+	2.68454	-0.551469	0.00132168	24.8974	25.07	25.0929	25.3014	25.4894	25.605	25.8128	25.6603
Q2FZ07	Q2FZ07	SAOUHSC_01264		Completeproteome;Referenceproteome	8.1612	4	64.8	1375800000	34	+	1.68755	0.165684	0.010077	24.1421	24.0104	24.0214	23.9326	23.8084	23.8923	23.9322	23.8109
Q2FZ08	Q2FZ08	rny	Ribonuclease Y	Cellmembrane;Completeproteome;Endonuclease;Hydrolase;Membrane;Nuclease;Referenceproteome;RNA-binding;Transmembrane;Transmembranehelix;Virulence	58.512	35	61.7	9704500000	416	+	2.05913	-0.445933	0.00460459	25.2198	25.5008	25.6661	25.6525	25.8199	25.9609	26.0813	25.9608
Q2FZ09	Q2FZ09	recA	Protein RecA	ATP-binding;Completeproteome;Cytoplasm;DNA-binding;DNAdamage;DNArecombination;DNArepair;Nucleotide-binding;Referenceproteome;SOSresponse	34.878	44	80.1	34390000000	926	+	3.20319	-0.438963	0.000671264	26.301	26.508	26.5747	26.3558	26.8263	26.9188	26.8997	26.8507
Q2FZ10	Q2FZ10	cinA	Putative competence-damage inducible protein	Completeproteome;Referenceproteome	43.267	14	46	2544000000	108		0.102641	0.0427942	0.633054	23.9396	24.5853	24.4015	24.4262	24.1142	24.2898	24.3855	24.3919
Q2FZ11	Q2FZ11	SAOUHSC_01260		Completeproteome;Lipidbiosynthesis;Lipidmetabolism;Membrane;Phospholipidbiosynthesis;Phospholipidmetabolism;Referenceproteome;Transferase;Transmembrane;Transmembranehelix	21.014	3	14.1	249150000	47	+	4.25682	-0.853919	0.000298246	21.423	21.3994	21.435	21.4155	22.4005	22.2317	22.05	22.4064
Q2FZ12	Q2FZ12	SAOUHSC_01259		Completeproteome;Referenceproteome	15.113	6	39.2	1894200000	146	+	1.71196	-0.539718	0.00963981	23.1293	23.3871	23.3615	23.7849	23.7631	23.8096	24.1995	24.0493
Q2FZ13	Q2FZ13	SAOUHSC_01258		Completeproteome;Referenceproteome	31.478	10	41.5	1389800000	79	+	1.75979	-0.41556	0.00830769	22.4862	22.6469	22.7932	22.8285	22.9152	23.1824	23.3527	22.9666
Q2FZ14	Q2FZ14	SAOUHSC_01257		Completeproteome;Referenceproteome	25.924	1	6.4	108030000	16		0.617699	-0.485168	0.127299	21.0179	21.4675	21.343	19.9003	21.3623	21.2296	21.3451	21.7323
Q2FZ15	Q2FZ15	SAOUHSC_01256		Completeproteome;Referenceproteome	49.909	22	60.5	7101500000	357	+	3.13836	-0.564961	0.000651786	24.2487	24.4553	24.3514	24.2353	24.6737	24.9193	24.9596	24.998
Q2FZ16	Q2FZ16	SAOUHSC_01255		Completeproteome;Referenceproteome	48.617	18	39.9	2500400000	266	+	4.22388	-0.753539	0.000291845	22.6864	22.9234	22.9213	22.885	23.5674	23.4836	23.6869	23.6924
Q2FZ17	Q2FZ17	SAOUHSC_01254		Completeproteome;DNA-binding;Referenceproteome;Transcription;Transcriptionregulation	26.95	10	66.2	3002800000	112	+	1.26541	-0.211298	0.0250913	24.2777	24.4467	24.5103	24.5856	24.7143	24.6498	24.5104	24.791
Q2FZ18	Q2FZ18	SAOUHSC_01253		ATP-binding;Completeproteome;DNA-binding;Nucleotide-binding;Referenceproteome	83.404	25	32.9	3078500000	316	+	1.31395	-0.243609	0.0227513	23.0076	23.206	23.3088	23.3504	23.3711	23.4042	23.4264	23.6457
Q2FZ19	Q2FZ19	rnj2	Ribonuclease J 2	Completeproteome;Cytoplasm;Endonuclease;Exonuclease;Hydrolase;Metal-binding;mRNAprocessing;Nuclease;Referenceproteome;RNA-binding;rRNAprocessing;Zinc	62.603	46	67	30276000000	637	+	1.13367	-0.184144	0.0346351	26.5117	26.8076	26.7608	26.8961	26.9286	26.954	26.8686	26.9615
Q2FZ20	Q2FZ20	pnp	Polyribonucleotide nucleotidyltransferase	Completeproteome;Cytoplasm;Magnesium;Metal-binding;Nucleotidyltransferase;Referenceproteome;RNA-binding;Transferase	77.361	64	78.4	58695000000	1211	+	2.31146	-0.165336	0.00268242	27.2012	27.296	27.2711	27.3647	27.4983	27.4164	27.4461	27.4334
Q2FZ21	Q2FZ21	frr	Ribosome-recycling factor	Completeproteome;Cytoplasm;Proteinbiosynthesis;Referenceproteome	20.353	24	93.5	87237000000	461	+	1.82106	-0.196273	0.00778739	29.2628	29.2713	29.2587	29.142	29.5366	29.3956	29.3093	29.4784
Q2FZ22	Q2FZ22	pyrH	Uridylate kinase	Allostericenzyme;ATP-binding;Completeproteome;Cytoplasm;Kinase;Nucleotide-binding;Pyrimidinebiosynthesis;Referenceproteome;Transferase	26.145	21	57.5	25125000000	424	+	1.55548	0.165418	0.0135022	27.132	27.3319	27.335	27.2698	27.1776	27.1052	27.0206	27.1037
Q2FZ23	Q2FZ23	tsf	Elongation factor Ts	Completeproteome;Cytoplasm;Elongationfactor;Proteinbiosynthesis;Referenceproteome	32.494	51	91.5	301730000000	1315	+	3.35898	-0.389411	0.000591479	31.4736	31.3676	31.2268	31.2913	31.7472	31.7132	31.6883	31.7682
Q2FZ25	Q2FZ25	rpsB	30S ribosomal protein S2	Completeproteome;Referenceproteome;Ribonucleoprotein;Ribosomalprotein	29.094	55	99.2	332360000000	1975		0.601854	-0.184293	0.133329	29.4443	29.8319	30.033	29.9011	29.7936	29.9725	30.1034	30.078
Q2FZ27	Q2FZ27	codY	GTP-sensing transcriptional pleiotropic repressor CodY	Completeproteome;Cytoplasm;DNA-binding;GTP-binding;Nucleotide-binding;Referenceproteome;Repressor;Transcription;Transcriptionregulation	28.755	50	96.1	111340000000	1080	+	1.97916	-0.254537	0.00568366	27.729	27.8103	27.9578	27.9867	28.0317	28.1751	28.1277	28.1675
Q2FZ28	Q2FZ28	hslU	ATP-dependent protease ATPase subunit HslU	ATP-binding;Chaperone;Completeproteome;Cytoplasm;Nucleotide-binding;Referenceproteome;Stressresponse	52.314	55	77.9	33131000000	921		0.567318	-0.0555072	0.145421	26.4551	26.4581	26.5289	26.6133	26.5407	26.6341	26.514	26.5886
Q2FZ29	Q2FZ29	hslV	ATP-dependent protease subunit HslV	Allostericenzyme;Completeproteome;Cytoplasm;Hydrolase;Metal-binding;Protease;Referenceproteome;Sodium;Stressresponse;Threonineprotease	19.572	13	60.8	7160700000	226		0.0803845	-0.0425372	0.691735	24.9616	25.3773	25.6159	25.6716	25.2891	25.2778	25.6995	25.5302
Q2FZ30	Q2FZ30	xerC	Tyrosine recombinase XerC	Cellcycle;Celldivision;Chromosomepartition;Completeproteome;Cytoplasm;DNA-binding;DNAintegration;DNArecombination;Referenceproteome	35.112	9	43	972180000	90	+	1.19839	0.414644	0.029959	22.2433	22.8977	23.0052	22.5938	22.1197	22.2163	22.3979	22.3475
Q2FZ31	Q2FZ31	trmFO	Methylenetetrahydrofolate--tRNA-(uracil-5-)-methyltransferase TrmFO	Completeproteome;Cytoplasm;FAD;Flavoprotein;Methyltransferase;Referenceproteome;Transferase;tRNAprocessing	48.371	27	56.1	11023000000	421	+	4.62558	-0.668433	0	24.5433	24.7054	24.5736	24.641	25.1722	25.266	25.3825	25.3161
Q2FZ32	Q2FZ32	topA	DNA topoisomerase 1	Completeproteome;DNA-binding;Isomerase;Magnesium;Metal-binding;Referenceproteome;Repeat;Topoisomerase;Zinc;Zinc-finger	79.112	55	61	12198000000	599	+	2.91023	-0.364679	0.000682353	25.411	25.4492	25.5491	25.5158	25.7616	25.7395	25.9526	25.93
Q2FZ36	Q2FZ36	SAOUHSC_01218	Succinyl-CoA ligase [ADP-forming] subunit alpha	ATP-binding;Completeproteome;Ligase;Nucleotide-binding;Referenceproteome	31.542	27	72.8	106940000000	652	+	6.08144	-0.899779	0	28.8845	28.8523	28.7948	28.8848	29.655	29.7965	29.7366	29.8274
Q2FZ37	Q2FZ37	sucC	Succinyl-CoA ligase [ADP-forming] subunit beta	ATP-binding;Completeproteome;Ligase;Magnesium;Manganese;Metal-binding;Nucleotide-binding;Referenceproteome;Tricarboxylicacidcycle	42.056	59	71.6	148590000000	1431	+	5.04338	-0.914405	0	27.9518	28.1373	28.136	28.1306	28.8649	29.0247	29.0865	29.0371
Q2FZ38	Q2FZ38	rnhB	Ribonuclease HII	Completeproteome;Cytoplasm;Endonuclease;Hydrolase;Manganese;Metal-binding;Nuclease;Referenceproteome	28.512	7	34.5	1504800000	91	+	1.29084	0.246123	0.024	23.8295	24.2676	24.1521	24.0088	23.8131	23.7388	23.9152	23.8065
Q2FZ39	Q2FZ39	SAOUHSC_01214	Ribosome biogenesis GTPase A	Completeproteome;Cytoplasm;GTP-binding;Nucleotide-binding;Referenceproteome	33.38	20	66.7	8644300000	349	+	1.13789	0.149522	0.0341787	25.1478	25.3398	25.2579	25.3966	25.0487	25.2524	25.111	25.1318
Q2FZ42	Q2FZ42	rplS	50S ribosomal protein L19	Completeproteome;Referenceproteome;Ribonucleoprotein;Ribosomalprotein	13.362	31	83.6	218230000000	809		0.790991	-0.189539	0.0808462	29.0133	29.2023	29.4039	29.2419	29.1729	29.3954	29.4582	29.5931
Q2FZ43	Q2FZ43	trmD	tRNA (guanine-N(1)-)-methyltransferase	Completeproteome;Cytoplasm;Methyltransferase;Referenceproteome;S-adenosyl-L-methionine;Transferase;tRNAprocessing	28.056	7	50.6	3933900000	132	+	0.991021	0.359971	0.0496014	25.2378	25.9718	25.4251	25.1538	24.9994	25.1352	25.1366	25.0774
Q2FZ44	Q2FZ44	rimM	Ribosome maturation factor RimM	Chaperone;Completeproteome;Cytoplasm;Referenceproteome;Ribosomebiogenesis	19.041	14	80.8	4314100000	194	+	1.44585	0.226006	0.0169492	25.1085	25.0013	24.8182	25.0159	24.9224	24.6737	24.763	24.6808
Q2FZ45	Q2FZ45	rpsP	30S ribosomal protein S16	Completeproteome;Referenceproteome;Ribonucleoprotein;Ribosomalprotein	10.235	17	95.6	80120000000	398	+	2.22629	-0.201771	0.00316571	28.6362	28.7082	28.8409	28.659	28.8868	28.8913	28.917	28.9563
Q2FZ46	Q2FZ46	ffh	Signal recognition particle protein	Completeproteome;Cytoplasm;GTP-binding;Nucleotide-binding;Referenceproteome;Ribonucleoprotein;RNA-binding;Signalrecognitionparticle	50.705	41	69	18935000000	558	+	2.75946	-0.345496	0.00129433	26.1967	26.3307	26.3394	26.4474	26.5843	26.7167	26.6367	26.7584
Q2FZ47	Q2FZ47	SAOUHSC_01206	UPF0122 protein SAOUHSC_01206	Completeproteome;Referenceproteome	13.581	8	50.9	1261500000	65	+	2.15133	-0.530304	0.00384895	23.5666	23.8886	23.8173	23.3728	24.1572	24.0393	24.2855	24.2847
Q2FZ48	Q2FZ48	ftsY	Signal recognition particle receptor FtsY	Cellmembrane;Completeproteome;Cytoplasm;GTP-binding;Membrane;Nucleotide-binding;Receptor;Referenceproteome	46.59	29	62.5	14339000000	413	+	3.4328	-0.426637	0.000608247	26.358	26.281	26.1932	26.1501	26.6424	26.7366	26.7291	26.5808
Q2FZ49	Q2FZ49	smc	Chromosome partition protein Smc	ATP-binding;Coiledcoil;Completeproteome;Cytoplasm;DNA-binding;Nucleotide-binding;Referenceproteome	136.75	66	55.4	7769700000	598	+	1.99237	-0.102865	0.0055611	24.3304	24.3135	24.3764	24.4281	24.4569	24.4633	24.4446	24.495
Q2FZ50	Q2FZ50	rnc	Ribonuclease 3	Completeproteome;Cytoplasm;Endonuclease;Hydrolase;Magnesium;Metal-binding;mRNAprocessing;Nuclease;Referenceproteome;RNA-binding;rRNA-binding;rRNAprocessing;tRNAprocessing	27.922	11	40.7	2492100000	153		0.198726	-0.0590158	0.444045	23.6813	24.0163	24.1872	24.1594	24.0347	24.0994	24.0975	24.0487
Q2FZ51	Q2FZ51	acpP	Acyl carrier protein	Completeproteome;Cytoplasm;Fattyacidbiosynthesis;Fattyacidmetabolism;Lipidbiosynthesis;Lipidmetabolism;Phosphopantetheine;Phosphoprotein;Referenceproteome	8.5493	8	58.4	59043000000	180		0.796299	-0.218624	0.0801311	29.911	29.5954	29.8285	29.3952	30.1029	29.8146	29.7962	29.891
Q2FZ53	Q2FZ53	SAOUHSC_01199		3D-structure;Completeproteome;NADP;Nucleotide-binding;Oxidoreductase;Referenceproteome	25.886	37	100	197820000000	846	+	6.01058	-0.596834	0	30.263	30.1613	30.1881	30.1787	30.8209	30.7894	30.7419	30.8263
Q2FZ54	Q2FZ54	SAOUHSC_01198	Malonyl CoA-acyl carrier protein transacylase	Acyltransferase;Completeproteome;Referenceproteome;Transferase	33.635	20	59.4	34515000000	429	+	5.17923	-0.565073	0	26.4213	26.5123	26.5473	26.5134	27.021	27.1437	27.0592	27.0305
Q2FZ55	Q2FZ55	plsX	Phosphate acyltransferase	Completeproteome;Cytoplasm;Lipidbiosynthesis;Lipidmetabolism;Phospholipidbiosynthesis;Phospholipidmetabolism;Referenceproteome;Transferase	35.43	40	82.3	32788000000	715	+	3.6704	-0.327516	0.000366864	26.4619	26.5017	26.5849	26.6373	26.9031	26.8736	26.8724	26.8467
Q2FZ56	Q2FZ56	fapR	Transcription factor FapR	3D-structure;Completeproteome;DNA-binding;Fattyacidbiosynthesis;Fattyacidmetabolism;Lipidbiosynthesis;Lipidmetabolism;Metal-binding;Referenceproteome;Repressor;Transcription;Transcriptionregulation;Zinc	21.99	9	64.2	2354500000	98	+	2.12652	-0.384589	0.00413352	23.5377	23.6096	23.7605	23.6952	24.1055	23.7853	24.101	24.1496
Q2FZ58	Q2FZ58	SAOUHSC_01193	Uncharacterized protein SAOUHSC_01193	Completeproteome;Referenceproteome	60.515	38	58.8	66324000000	699		0.00269015	0.000267982	0.98593	28.5766	28.6248	28.5397	28.5084	28.6104	28.5745	28.5054	28.5583
Q2FZ59	Q2FZ59	SAOUHSC_01192		Completeproteome;Referenceproteome	13.385	12	70.2	16135000000	265		0.164431	0.0325336	0.499725	26.3027	26.3933	26.648	26.4352	26.3874	26.4168	26.4716	26.3732
Q2FZ60	Q2FZ60	rpmB	50S ribosomal protein L28	Completeproteome;Referenceproteome;Ribonucleoprotein;Ribosomalprotein	6.9771	10	56.5	43358000000	189	+	1.97087	-0.231676	0.00571429	28.4047	28.5172	28.6371	28.5439	28.8186	28.6406	28.8163	28.754
Q2FZ61	Q2FZ61	SAOUHSC_01190		Completeproteome;Referenceproteome	23.884	7	38	967140000	71		0.626515	-0.21388	0.124629	22.3093	22.354	22.6762	22.9999	22.7293	22.8232	22.8011	22.8413
Q2FZ62	Q2FZ62	SAOUHSC_01189	Ribulose-phosphate 3-epimerase	Carbohydratemetabolism;Cobalt;Completeproteome;Isomerase;Manganese;Metal-binding;Referenceproteome;Zinc	23.572	7	43.9	1573500000	107		0.218877	-0.0889826	0.416875	23.2095	23.8178	23.7601	23.6162	23.4962	23.6295	23.9126	23.7213
Q2FZ63	Q2FZ63	rsgA	Putative ribosome biogenesis GTPase RsgA	Completeproteome;GTP-binding;Hydrolase;Metal-binding;Nucleotide-binding;Referenceproteome;Zinc	33.235	10	45.3	1557400000	116		0.111873	0.052793	0.609107	23.3826	23.6994	23.6356	23.9974	23.4154	23.4359	23.7404	23.9121
Q2FZ64	Q2FZ64	SAOUHSC_01187		Completeproteome;Referenceproteome	74.362	20	26.2	3945300000	295		0.536165	0.0619807	0.159069	24.3119	24.4649	24.4967	24.3825	24.3099	24.3211	24.3247	24.4523
Q2FZ65	Q2FZ65	SAOUHSC_01186		Completeproteome;Referenceproteome	28.046	15	78.1	7150700000	218	+	3.79038	0.4597	0.000389937	25.625	25.617	25.574	25.4279	25.0452	25.0861	25.1893	25.0845
Q2FZ66	Q2FZ66	rlmN	Probable dual-specificity RNA methyltransferase RlmN	4Fe-4S;Antibioticresistance;Completeproteome;Cytoplasm;Disulfidebond;Iron;Iron-sulfur;Metal-binding;Methyltransferase;Referenceproteome;rRNAprocessing;S-adenosyl-L-methionine;Transferase;tRNAprocessing	41.904	25	58.5	6980900000	279	+	3.05916	0.512115	0.000621277	24.9314	25.2316	25.1536	25.056	24.5157	24.4661	24.6774	24.6649
Q2FZ67	Q2FZ67	SAOUHSC_01184	Ribosomal RNA small subunit methyltransferase B	Completeproteome;Cytoplasm;Methyltransferase;Referenceproteome;RNA-binding;rRNAprocessing;S-adenosyl-L-methionine;Transferase	50.114	17	43.2	5192200000	196	+	1.63824	0.198375	0.010992	24.8253	25.0853	24.9343	25.0187	24.7685	24.858	24.7457	24.6978
Q2FZ68	Q2FZ68	fmt	Methionyl-tRNA formyltransferase	Completeproteome;Proteinbiosynthesis;Referenceproteome;Transferase	34.211	21	70.7	11470000000	394	+	4.12575	0.628351	0.000494024	26.4093	26.3386	26.5923	26.5539	25.7872	25.8205	25.9145	25.8584
Q2FZ69	Q2FZ69	SAOUHSC_01173		Completeproteome;Referenceproteome	8.1068	2	20	16541000	15	+	1.39178	0.812761	0.018881	20.211	19.5197	20.9863	20.1696	19.2655	19.6618	19.3666	19.3416
Q2FZ70	Q2FZ70	pyrE	Orotate phosphoribosyltransferase	Completeproteome;Glycosyltransferase;Magnesium;Pyrimidinebiosynthesis;Referenceproteome;Transferase	22.042	5	38.9	190780000	22	+	4.52273	-1.71772	0	20.8557	20.4422	20.8559	20.6607	22.1979	22.7171	22.4969	22.2734
Q2FZ71	Q2FZ71	pyrF	Orotidine 5'-phosphate decarboxylase	Completeproteome;Decarboxylase;Lyase;Pyrimidinebiosynthesis;Referenceproteome	25.596	12	68.7	1129300000	84	+	4.86141	-1.50903	0	23.19	23.2519	22.8766	23.1325	24.5216	24.4377	24.7549	24.7728
Q2FZ72	Q2FZ72	carB	Carbamoyl-phosphate synthase large chain	Amino-acidbiosynthesis;Argininebiosynthesis;ATP-binding;Completeproteome;Ligase;Magnesium;Manganese;Metal-binding;Nucleotide-binding;Pyrimidinebiosynthesis;Referenceproteome;Repeat	117.18	62	55.7	10721000000	712	+	6.64928	-1.77822	0	24.0293	24.0003	24.0426	24.0881	25.7211	25.7123	25.9965	25.8432
Q2FZ73	Q2FZ73	carA	Carbamoyl-phosphate synthase small chain	Amino-acidbiosynthesis;Argininebiosynthesis;ATP-binding;Completeproteome;Glutamineamidotransferase;Ligase;Nucleotide-binding;Pyrimidinebiosynthesis;Referenceproteome	40.393	14	42.9	2340900000	105	+	6.02412	-1.65904	0	23.4131	23.4028	23.4183	23.2607	24.8424	25.0099	25.0945	25.1842
Q2FZ74	Q2FZ74	pyrC	Dihydroorotase	Completeproteome;Hydrolase;Metal-binding;Pyrimidinebiosynthesis;Referenceproteome;Zinc	46.371	16	38.9	2612300000	139	+	4.95655	-1.74164	0	24.1531	23.8624	23.6305	23.764	25.5146	25.4815	25.7901	25.5902
Q2FZ75	Q2FZ75	pyrB	Aspartate carbamoyltransferase	Completeproteome;Pyrimidinebiosynthesis;Referenceproteome;Transferase	33.257	13	35.5	2077100000	151	+	4.12754	-1.38027	0.000496	23.1159	23.405	23.5286	23.5136	24.5017	24.7205	25.0138	24.8482
Q2FZ76	Q2FZ76	SAOUHSC_01165		Completeproteome;Referenceproteome	46.61	3	6.4	137210000	16	+	3.73813	-1.7775	0.000382716	20.5673	20.6934	21.2339	20.4686	22.1614	22.5471	22.8209	22.5436
Q2FZ77	Q2FZ77	pyrR	Bifunctional protein PyrR;Pyrimidine operon regulatory protein;Uracil phosphoribosyltransferase	Completeproteome;Glycosyltransferase;Referenceproteome;RNA-binding;Transcription;Transcriptionregulation;Transcriptiontermination;Transferase	19.855	12	66.3	3620800000	194	+	5.80042	-1.12381	0	23.5959	23.7371	23.7406	23.6114	24.7042	24.7304	24.8967	24.849
Q2FZ78	Q2FZ78	SAOUHSC_01163	Pseudouridine synthase	Completeproteome;Isomerase;Referenceproteome	34.604	31	70.5	10337000000	501	+	2.93199	-0.28448	0.000693227	24.6408	24.6447	24.5532	24.6779	24.8225	24.9994	24.9655	24.8671
Q2FZ81	Q2FZ81	SAOUHSC_01160		Completeproteome;Referenceproteome	30.367	5	20.8	536850000	39	+	1.87743	-0.424069	0.00652949	22.3638	22.3363	22.0666	22.5243	22.5302	22.7869	22.7768	22.8933
Q2FZ82	Q2FZ82	ileS	Isoleucine--tRNA ligase	Aminoacyl-tRNAsynthetase;ATP-binding;Completeproteome;Cytoplasm;Ligase;Metal-binding;Nucleotide-binding;Proteinbiosynthesis;Referenceproteome;Zinc	104.88	79	78.3	77650000000	1617	+	2.41503	-0.244318	0.00239502	27.0804	27.1711	27.1853	27.2584	27.3526	27.3558	27.5141	27.4499
Q2FZ83	Q2FZ83	SAOUHSC_01158		Cellcycle;Celldivision;Coiledcoil;Completeproteome;Cytoplasm;Referenceproteome	23.514	20	57.1	21852000000	331	+	3.03708	-0.477508	0.000612159	26.5931	26.8485	26.6915	26.7917	27.1264	27.1194	27.2351	27.3539
Q2FZ84	Q2FZ84	SAOUHSC_01156		Completeproteome;Referenceproteome	31.2	3	7.8	46362000	4	+	1.57395	0.34949	0.0128923	20.3463	19.9066	20.0944	20.2656	19.8265	19.7299	19.9883	19.6702
Q2FZ85	Q2FZ85	SAOUHSC_01155		Completeproteome;Referenceproteome	11.252	3	18.8	497580000	45		0.577038	-0.228815	0.141986	21.8932	22.3818	22.5075	22.7055	22.7481	22.6224	22.4161	22.6166
Q2FZ86	Q2FZ86	sepF	Cell division protein SepF	Cellcycle;Celldivision;Completeproteome;Cytoplasm;Referenceproteome;Septation	21.023	14	50.3	15747000000	274		0.919501	-0.0965118	0.0598	26.283	26.3188	26.3465	26.348	26.3364	26.5671	26.3691	26.4098
Q2FZ87	Q2FZ87	SAOUHSC_01153		Completeproteome;Pyridoxalphosphate;Referenceproteome	25.347	8	45	1932400000	99		0.384384	0.0909114	0.245866	24.6886	24.5541	24.6043	24.6445	24.6942	24.2449	24.5655	24.6233
Q2FZ88	Q2FZ88	SAOUHSC_01152	Laccase domain protein	Completeproteome;Referenceproteome	25.397	4	20.4	299830000	15		0.440301	0.180144	0.210075	22.9258	22.1758	22.4765	22.3796	22.0602	22.2851	22.465	22.4268
Q2FZ89	Q2FZ89	ftsZ	Cell division protein FtsZ	Cellcycle;Celldivision;Completeproteome;Cytoplasm;GTP-binding;Nucleotide-binding;Referenceproteome;Septation	41.036	45	76.7	291830000000	1708		0.507511	0.0595398	0.171135	30.0605	30.1027	29.9449	30.0393	30.0748	30.0209	29.909	29.9045
Q2FZ91	Q2FZ91	divIB	Cell division protein DivIB	Cellcycle;Celldivision;Cellmembrane;Completeproteome;Membrane;Referenceproteome;Transmembrane;Transmembranehelix	50.211	28	49.4	3243200000	274		0.179635	0.0494394	0.472693	23.7575	24.1119	23.905	24.1538	24.0763	23.9531	23.8293	23.8715
Q2FZ92	Q2FZ92	murD	UDP-N-acetylmuramoylalanine--D-glutamate ligase	ATP-binding;Cellcycle;Celldivision;Cellshape;Cellwallbiogenesis/degradation;Completeproteome;Cytoplasm;Ligase;Nucleotide-binding;Peptidoglycansynthesis;Referenceproteome	49.843	28	64.1	15874000000	319		0.0178151	0.00438976	0.921085	26.3246	26.5895	26.4516	26.6804	26.4695	26.5284	26.4496	26.581
Q2FZ93	Q2FZ93	mraY	Phospho-N-acetylmuramoyl-pentapeptide-transferase	Cellcycle;Celldivision;Cellmembrane;Cellshape;Cellwallbiogenesis/degradation;Completeproteome;Membrane;Peptidoglycansynthesis;Referenceproteome;Transferase;Transmembrane;Transmembranehelix	35.232	3	5.6	846200000	62		0.605219	0.230421	0.131966	22.112	22.4293	22.4678	22.9129	22.3154	22.3958	22.0545	22.2345
Q2FZ94	Q2FZ94	SAOUHSC_01145		Completeproteome;Referenceproteome	82.708	55	62.9	9895000000	656		0.066069	-0.0163608	0.737067	24.2513	24.3381	24.5325	24.5621	24.347	24.562	24.4418	24.3987
Q2FZ97	Q2FZ97	mraZ	Transcriptional regulator MraZ	Completeproteome;Cytoplasm;DNA-binding;Referenceproteome;Repeat;Transcription;Transcriptionregulation	17.237	10	49.7	3365100000	123	+	1.66837	-0.426177	0.0102581	23.5963	23.607	23.9105	24.0357	24.0627	24.3968	24.0836	24.3112
Q2FZA1	Q2FZA1	SAOUHSC_01138	Uncharacterized N-acetyltransferase SAOUHSC_01138	Acyltransferase;Completeproteome;Referenceproteome;Transferase	17.002	15	93.2	10480000000	263	+	1.86189	0.295687	0.00682793	26.2036	26.3185	26.4061	26.1945	25.7886	26.0905	26.0759	25.9849
Q2FZA2	Q2FZA2	SAOUHSC_01137		Completeproteome;Referenceproteome	27.205	7	32.5	450570000	47		0.853918	0.516546	0.0701884	22.9863	23.422	23.0721	22.7939	22.2598	23.335	22.5086	22.1047
Q2FZA5	Q2FZA5	SAOUHSC_01134		Completeproteome;Referenceproteome	7.1921	8	79	1588300000	116	+	1.62183	0.305863	0.0111674	23.6678	23.5121	23.7151	23.6149	23.0515	23.4653	23.3885	23.3813
Q2FZA8	Q2FZA8	SAOUHSC_01130		Completeproteome;Referenceproteome	54.069	5	11.7	488350000	55	+	5.04114	-1.25987	0	21.6615	21.9435	22.0416	21.8982	23.2203	23.21	23.0373	23.1166
Q2FZA9	Q2FZA9	arcC1	Carbamate kinase 1	Argininemetabolism;ATP-binding;Completeproteome;Cytoplasm;Kinase;Nucleotide-binding;Referenceproteome;Transferase	33.596	27	49	7928100000	259	+	4.66615	-1.20217	0	24.3246	24.5433	24.4521	24.3259	25.8669	25.5253	25.5733	25.4892
Q2FZB0	Q2FZB0	argF	Ornithine carbamoyltransferase	Amino-acidbiosynthesis;Argininebiosynthesis;Completeproteome;Cytoplasm;Referenceproteome;Transferase	37.516	33	67	29162000000	653	+	4.34214	-1.16241	0.000319249	25.7991	26.079	25.9982	25.862	27.3407	26.9416	27.1335	26.9722
Q2FZB4	Q2FZB4	SAOUHSC_01123		Completeproteome;Referenceproteome	8.6298	4	71.6	207780000	27	+	1.02619	1.3144	0.0456453	24.08	21.6397	23.6458	22.2975	21.6281	22.5212	20.9566	21.2995
Q2FZB8	Q2FZB8	SAOUHSC_01114		Completeproteome;Referenceproteome	18.764	5	23.6	408670000	28	+	3.96847	-1.50421	0.000430556	20.7074	21.0186	21.0445	21.1001	22.141	22.6101	22.3483	22.7882
Q2FZC2	Q2FZC2	SAOUHSC_01110		Completeproteome;Referenceproteome	12.597	11	55	4406100000	187	+	4.1056	-1.47478	0.00048249	23.41	23.9157	23.8041	23.9503	24.9987	25.3978	25.1977	25.3851
Q2FZC4	Q2FZC4	SAOUHSC_01108	Phosphoesterase	Completeproteome;Metal-binding;Referenceproteome	19.289	2	22.2	198400000	17		0.527353	-0.559028	0.162035	21.5931	20.7931	20.0759	19.7195	21.3737	21.0922	21.5707	20.3811
Q2FZC5	Q2FZC5	SAOUHSC_01107	Non-canonical purine NTP pyrophosphatase	Completeproteome;Hydrolase;Magnesium;Manganese;Metal-binding;Nucleotide-binding;Nucleotidemetabolism;Referenceproteome	21.403	13	86.7	9388400000	202		0.939217	-0.180262	0.056659	25.9891	26.216	26.1953	26.0983	26.4437	26.4464	26.2094	26.1202
Q2FZC6	Q2FZC6	murI	Glutamate racemase	Cellshape;Cellwallbiogenesis/degradation;Completeproteome;Isomerase;Peptidoglycansynthesis;Referenceproteome	29.698	14	47.4	3111000000	197		0.571217	-0.182219	0.144071	23.1364	23.6354	23.7142	23.5664	23.6116	23.6153	23.9203	23.6342
Q2FZC7	Q2FZC7	SAOUHSC_01105		Completeproteome;Referenceproteome	30.583	26	60.9	19548000000	496	+	3.30143	-0.40281	0.000564593	26.2777	26.1829	26.2955	26.416	26.6192	26.7553	26.7553	26.6535
Q2FZC8	Q2FZC8	SAOUHSC_01104		Completeproteome;Oxidoreductase;Referenceproteome	65.502	56	89.3	48204000000	1090	+	2.48047	-0.261596	0.00203846	26.8986	26.8592	26.7524	26.8976	26.9885	27.1465	27.1289	27.1904
Q2FZC9	Q2FZC9	SAOUHSC_01103		Completeproteome;Referenceproteome	23.599	2	5.4	1359600000	42	+	1.38818	-0.528984	0.0191467	23.1493	23.6479	23.4733	24.015	24.3572	23.9251	24.1228	23.9963
Q2FZD0	Q2FZD0	uvrC	UvrABC system protein C	Completeproteome;Cytoplasm;DNAdamage;DNAexcision;DNArepair;Excisionnuclease;Referenceproteome;SOSresponse	68.671	12	24.1	481610000	93	+	2.70998	0.462352	0.00134281	21.7949	21.672	21.7153	21.8021	21.0391	21.3302	21.3763	21.3892
Q2FZD2	Q2FZD2	trxA	Thioredoxin	Completeproteome;Disulfidebond;Electrontransport;Redox-activecenter;Referenceproteome;Transport	11.44	12	80.8	13546000000	249	+	1.39062	-0.461139	0.0189072	26.9533	26.6481	26.5773	26.2041	27.2709	27.0397	27.0763	26.8405
Q2FZD3	Q2FZD3	mutS2	Endonuclease MutS2	ATP-binding;Completeproteome;DNA-binding;Endonuclease;Hydrolase;Nuclease;Nucleotide-binding;Referenceproteome	88.66	29	36.6	5024200000	293	+	1.67702	-0.25037	0.0101965	24.1143	24.3817	24.215	24.3596	24.4538	24.6328	24.4159	24.5695
Q2FZD4	Q2FZD4	SAOUHSC_01098		Completeproteome;Referenceproteome	64.87	20	49.8	3868200000	222	+	2.50153	0.328138	0.00191191	24.3399	24.3101	24.4426	24.4392	24.0761	23.9019	24.1942	24.0471
Q2FZD7	Q2FZD7	rnhC	Ribonuclease HIII	Completeproteome;Cytoplasm;Endonuclease;Hydrolase;Magnesium;Metal-binding;Nuclease;Referenceproteome	35.054	15	49	1728500000	133	+	3.30893	-0.884548	0.000567308	21.6692	22.1108	22.1321	22.2385	22.8837	23.0163	22.8854	22.9033
Q2FZD8	Q2FZD8	pheT	Phenylalanine--tRNA ligase beta subunit	Aminoacyl-tRNAsynthetase;ATP-binding;Completeproteome;Cytoplasm;Ligase;Magnesium;Metal-binding;Nucleotide-binding;Proteinbiosynthesis;Referenceproteome;RNA-binding;tRNA-binding	88.92	52	58.8	36231000000	999	+	4.6516	-0.246001	0	26.7614	26.7519	26.8105	26.7295	27.0196	26.9857	26.9943	27.0378
Q2FZD9	Q2FZD9	pheS	Phenylalanine--tRNA ligase alpha subunit	Aminoacyl-tRNAsynthetase;ATP-binding;Completeproteome;Cytoplasm;Ligase;Magnesium;Metal-binding;Nucleotide-binding;Proteinbiosynthesis;Referenceproteome	40.106	30	62.8	12606000000	423	+	1.09294	-0.167408	0.0390524	25.6071	25.5105	25.5443	25.8601	25.7831	25.8249	25.804	25.7795
Q2FZE0	Q2FZE0	SAOUHSC_01091		Completeproteome;Methyltransferase;Referenceproteome;Transferase	26.913	12	58.9	3706700000	213	+	3.912	-0.610279	0.000413333	24.4625	24.1746	24.4222	24.3225	25.0256	24.9126	24.9727	24.9121
Q2FZF1	Q2FZF1	rpmF	50S ribosomal protein L32	Completeproteome;Referenceproteome;Ribonucleoprotein;Ribosomalprotein	6.6407	1	22.4	104950000	11	+	1.00451	1.3668	0.0480617	21.0942	20.3348	22.8133	22.733	19.5198	20.3227	20.5099	21.1557
Q2FZF3	Q2FZF3	SAOUHSC_01077		Completeproteome;Referenceproteome	21.415	8	44.3	3298100000	140		0.920915	-0.224597	0.0599051	24.5443	24.555	24.7775	24.743	24.606	24.9417	25.1237	24.8468
Q2FZF4	Q2FZF4	SAOUHSC_01076	UPF0348 protein SAOUHSC_01076	Completeproteome;Referenceproteome	43.24	6	33.5	397870000	56		0.693782	-0.237627	0.104528	22.0161	21.3153	21.603	21.8085	22.1024	21.7507	21.9397	21.9006
Q2FZF5	Q2FZF5	coaD	Phosphopantetheine adenylyltransferase	ATP-binding;CoenzymeAbiosynthesis;Completeproteome;Cytoplasm;Nucleotide-binding;Nucleotidyltransferase;Referenceproteome;Transferase	18.371	5	36.9	1036300000	53	+	2.96694	-0.719671	0.00070303	23.1758	23.3254	23.2366	23.2153	23.8034	23.708	24.1628	24.1575
Q2FZF6	Q2FZF6	SAOUHSC_01074		Completeproteome;Referenceproteome	17.566	9	50.6	3410700000	185	+	3.23023	-0.844986	0.000550117	23.3589	23.6258	23.7608	23.6796	24.1713	24.5793	24.5123	24.5421
Q2FZF8	Q2FZF8	SAOUHSC_01072	UPF0298 protein SAOUHSC_01072	Completeproteome;Cytoplasm;Referenceproteome	10.413	1	13.1	52683000	6		0.192565	-0.225745	0.452074	20.4908	20.7608	20.8241	19.196	21.0063	20.9563	19.9584	20.2537
Q2FZF9	Q2FZF9	SAOUHSC_01071		Completeproteome;Hydrolase;Referenceproteome	34.733	23	62.3	5138500000	322	+	3.86632	-0.579282	0.000406557	24.4722	24.6594	24.7727	24.6332	25.189	25.2427	25.2703	25.1526
Q2FZG0	Q2FZG0	SAOUHSC_01070		Completeproteome;Referenceproteome	16.476	4	36.8	207860000	44		0.693557	-0.471647	0.104444	20.1962	21.6971	21.3771	21.2504	21.4694	21.5577	21.6957	21.6845
Q2FZG1	Q2FZG1	SAOUHSC_01069		Completeproteome;Referenceproteome	31.436	5	34.1	721890000	28		0.668217	0.23948	0.111249	22.8885	23.2059	22.8	23.3084	22.7603	22.4927	22.9432	23.0487
Q2FZG4	Q2FZG4	SAOUHSC_01040		Completeproteome;Oxidoreductase;Pyruvate;Referenceproteome	41.382	50	99.7	232880000000	1202	+	3.39949	0.228226	0.000597468	29.6005	29.5687	29.5527	29.5661	29.2804	29.4135	29.3748	29.3064
Q2FZG5	Q2FZG5	SAOUHSC_01039		Completeproteome;Referenceproteome	23.875	28	65.4	8302600000	461	+	1.9092	0.198757	0.00628571	24.275	24.3056	24.2221	24.3485	24.2069	24.0781	23.9657	24.1055
Q2FZG6	Q2FZG6	def	Peptide deformylase	Completeproteome;Hydrolase;Iron;Metal-binding;Proteinbiosynthesis;Referenceproteome	20.559	21	82.5	23958000000	499		0.855034	0.128823	0.0701422	27.4189	27.2322	27.4183	27.5227	27.1394	27.3307	27.2727	27.3341
Q2FZG8	Q2FZG8	SAOUHSC_01036	UPF0356 protein SAOUHSC_01036	Completeproteome;Referenceproteome	8.7516	8	98.6	3111700000	123		0.232288	0.121023	0.398688	26.4617	25.9675	25.8822	25.793	25.9954	25.9376	26.1938	25.4934
Q2FZG9	Q2FZG9	rnj1	Ribonuclease J 1	Completeproteome;Cytoplasm;Endonuclease;Exonuclease;Hydrolase;Metal-binding;mRNAprocessing;Nuclease;Referenceproteome;RNA-binding;rRNAprocessing;Zinc	62.668	59	69.7	38545000000	1061	+	1.16555	-0.192819	0.0320614	26.6334	26.8646	26.8919	27.0217	27.023	27.071	26.9698	27.119
Q2FZH1	Q2FZH1	SAOUHSC_01034		Completeproteome;Referenceproteome	24.282	13	71.4	5426800000	197	+	4.87923	0.663512	0	25.9255	26.0098	25.8388	26.0447	25.3507	25.3016	25.2483	25.2642
Q2FZH2	Q2FZH2	SAOUHSC_01032		Completeproteome;Oxidoreductase;Referenceproteome	38.946	4	7.7	174680000	10	+	1.72648	1.50076	0.00911164	21.4005	22.3387	22.3608	22.3129	21.179	20.1768	21.3835	19.6706
Q2FZH3	Q2FZH3	SAOUHSC_01031		Completeproteome;Referenceproteome	51.145	11	19.9	3026600000	137	+	4.45365	2.19626	0	24.769	25.2092	24.8842	25.6074	22.8298	23.1115	22.7926	22.9509
Q2FZH4	Q2FZH4	SAOUHSC_01030		Completeproteome;Referenceproteome	9.1962	1	16.9	129140000	22		0.372681	0.142895	0.254491	22.1249	22.4234	22.104	21.8072	21.9258	22.0129	22.2384	21.7109
Q2FZH5	Q2FZH5	SAOUHSC_01029	Phosphoenolpyruvate-protein phosphotransferase	Completeproteome;Cytoplasm;Kinase;Magnesium;Metal-binding;Phosphotransferasesystem;Pyruvate;Referenceproteome;Sugartransport;Transferase;Transport	63.218	56	84.1	130530000000	1198	+	5.05429	0.373042	0	30.1024	30.1895	30.1435	30.1136	29.7922	29.7964	29.7178	29.7504
Q2FZH6	Q2FZH6	SAOUHSC_01028		Completeproteome;Cytoplasm;Kinase;Phosphotransferasesystem;Referenceproteome;Serine/threonine-proteinkinase;Transferase	9.4956	13	100	21775000000	308	+	2.55356	0.433909	0.00175369	28.2257	28.1572	28.1677	27.867	27.7343	27.5657	27.7185	27.6636
Q2FZH7	Q2FZH7	SAOUHSC_01027		Completeproteome;Referenceproteome	20.089	17	78.9	5174600000	202	+	1.08017	-0.463925	0.0404287	24.4124	25.3851	25.2168	25.1973	25.5654	25.3665	25.5519	25.5836
Q2FZH8	Q2FZH8	SAOUHSC_01026		Completeproteome;Cytoplasm;Methyltransferase;Referenceproteome;rRNAprocessing;S-adenosyl-L-methionine;Transferase	44.767	17	52.3	3084400000	200		0.212056	0.0387545	0.425892	24.1998	24.4124	24.4899	24.3882	24.4133	24.2437	24.2963	24.382
Q2FZH9	Q2FZH9	SAOUHSC_01025		Completeproteome;Referenceproteome	50.454	12	16.9	1336500000	105	+	3.04663	0.605567	0.000616034	23.8284	23.6929	24.0267	24.028	23.3429	23.3439	23.1183	23.3487
Q2FZI0	Q2FZI0	SAOUHSC_01024		Completeproteome;Referenceproteome	5.1626	2	43.2	78533000	13	+	1.36522	-0.890719	0.0201401	19.7885	20.2215	19.8548	19.3104	21.018	19.8798	21.209	20.6313
Q2FZI2	Q2FZI2	SAOUHSC_01022		Completeproteome;Referenceproteome	21.002	1	6.8	229930000	22		0.0475913	0.0327225	0.800066	21.9175	22.616	22.9286	22.7946	22.6141	22.376	22.7314	22.4044
Q2FZI5	Q2FZI5	purD	Phosphoribosylamine--glycine ligase	ATP-binding;Completeproteome;Ligase;Magnesium;Manganese;Metal-binding;Nucleotide-binding;Purinebiosynthesis;Referenceproteome	45.849	19	60.5	1231500000	117	+	2.31476	-1.38881	0.00260947	23.3294	22.6134	21.8541	22.8794	23.8902	24.2534	24.1189	23.969
Q2FZI6	Q2FZI6	purH	Bifunctional purine biosynthesis protein PurH;IMP cyclohydrolase;Phosphoribosylaminoimidazolecarboxamide formyltransferase	Completeproteome;Hydrolase;Multifunctionalenzyme;Purinebiosynthesis;Referenceproteome;Transferase	54.347	32	68.3	10071000000	564	+	3.6147	-1.10378	0.000515759	24.2753	24.477	24.5023	24.8243	25.3747	25.6423	25.7461	25.731
Q2FZI7	Q2FZI7	purN	Phosphoribosylglycinamide formyltransferase	Completeproteome;Purinebiosynthesis;Referenceproteome;Transferase	21.151	6	40.4	230330000	38	+	2.83652	-2.5175	0.000908397	19.973	20.7659	19.0862	20.4529	21.9529	22.3897	22.8008	23.2047
Q2FZI8	Q2FZI8	purM	Phosphoribosylformylglycinamidine cyclo-ligase	ATP-binding;Completeproteome;Cytoplasm;Ligase;Nucleotide-binding;Purinebiosynthesis;Referenceproteome	37.017	8	38	1202800000	78	+	2.83233	-1.27336	0.000904943	23.0386	23.5103	23.6524	23.6006	24.1939	24.8187	25.028	24.8548
Q2FZI9	Q2FZI9	purF	Amidophosphoribosyltransferase	Completeproteome;Glutamineamidotransferase;Glycosyltransferase;Magnesium;Metal-binding;Purinebiosynthesis;Referenceproteome;Transferase	54.396	13	39.1	892590000	97	+	3.84588	-1.71844	0.000402597	22.2294	22.0446	22.5853	22.8069	23.9989	23.9892	24.4397	24.1122
Q2FZJ0	Q2FZJ0	purL	Phosphoribosylformylglycinamidine synthase subunit PurL	ATP-binding;Completeproteome;Cytoplasm;Ligase;Magnesium;Metal-binding;Nucleotide-binding;Purinebiosynthesis;Referenceproteome	79.535	25	44	2625800000	237	+	5.55721	-1.33377	0	22.708	22.809	22.698	22.9913	24.0966	24.2016	24.0403	24.2028
Q2FZJ1	Q2FZJ1	purQ	Phosphoribosylformylglycinamidine synthase subunit PurQ	ATP-binding;Completeproteome;Cytoplasm;Glutamineamidotransferase;Hydrolase;Ligase;Nucleotide-binding;Purinebiosynthesis;Referenceproteome	24.527	5	28.3	393570000	43	+	5.55776	-1.84246	0	21.9709	21.7063	22.1292	22.1357	23.7019	23.8685	23.8862	23.8553
Q2FZJ2	Q2FZJ2	purS	Phosphoribosylformylglycinamidine synthase subunit PurS	ATP-binding;Completeproteome;Cytoplasm;Ligase;Nucleotide-binding;Purinebiosynthesis;Referenceproteome	9.9211	7	100	3154900000	112	+	4.11644	-1.09874	0.000484375	23.9443	24.0682	24.3006	24.2033	24.9828	25.3389	25.3478	25.2418
Q2FZJ3	Q2FZJ3	purC	Phosphoribosylaminoimidazole-succinocarboxamide synthase	ATP-binding;Completeproteome;Ligase;Nucleotide-binding;Purinebiosynthesis;Referenceproteome	26.692	17	71.4	932390000	77	+	3.51144	-1.04632	0.000485175	22.6183	22.4348	22.5088	22.9849	23.5032	23.8433	23.6637	23.7218
Q2FZJ4	Q2FZJ4	purK	N5-carboxyaminoimidazole ribonucleotide synthase	ATP-binding;Completeproteome;Ligase;Lyase;Nucleotide-binding;Purinebiosynthesis;Referenceproteome	42.493	9	32.1	1298700000	103	+	3.87001	-0.980843	0.000407895	22.8755	22.9992	23.1526	23.3499	24.008	24.1229	23.9775	24.1923
Q2FZJ5	Q2FZJ5	purE	N5-carboxyaminoimidazole ribonucleotide mutase	Completeproteome;Isomerase;Lyase;Purinebiosynthesis;Referenceproteome	14.742	8	84.9	3559700000	99	+	1.68532	-0.57753	0.0100536	25.4934	25.7856	25.6376	26.1257	26.0771	26.581	26.1682	26.526
Q2FZJ6	Q2FZJ6	folD	Bifunctional protein FolD;Methenyltetrahydrofolate cyclohydrolase;Methylenetetrahydrofolate dehydrogenase	Amino-acidbiosynthesis;Completeproteome;Histidinebiosynthesis;Hydrolase;Methioninebiosynthesis;Multifunctionalenzyme;NADP;One-carbonmetabolism;Oxidoreductase;Purinebiosynthesis;Referenceproteome	30.843	27	88.5	24605000000	587		0.521214	0.0672674	0.164165	27.4331	27.4627	27.3133	27.5609	27.3559	27.4476	27.3946	27.3028
Q2FZJ9	Q2FZJ9	qoxA	Probable quinol oxidase subunit 2	Cellmembrane;Completeproteome;Electrontransport;Lipoprotein;Membrane;Oxidoreductase;Palmitate;Referenceproteome;Respiratorychain;Signal;Transmembrane;Transmembranehelix;Transport	41.777	31	64.8	33298000000	566		0.609951	-0.0769496	0.129882	27.5229	27.6233	27.4707	27.6718	27.7307	27.6935	27.5628	27.6096
Q2FZK0	Q2FZK0	qoxB	Probable quinol oxidase subunit 1	Cellmembrane;Completeproteome;Copper;Electrontransport;Heme;Hydrogeniontransport;Iontransport;Iron;Membrane;Metal-binding;Oxidoreductase;Referenceproteome;Respiratorychain;Transmembrane;Transmembranehelix;Transport	75.242	9	13.7	14164000000	242		0.279048	0.0464263	0.341816	26.9951	27.1328	27.2791	27.2201	27.187	27.1336	27.0613	27.0595
Q2FZK3	Q2FZK3	fmtA	Protein FmtA	Antibioticresistance;Cellmembrane;Cellwallbiogenesis/degradation;Completeproteome;Membrane;Referenceproteome;Signal	46.067	20	49.9	1939600000	215	+	2.78923	-0.879958	0.00113544	22.3311	23.0686	22.7678	22.7059	23.6149	23.7065	23.6377	23.4342
Q2FZK7	Q2FZK7	atl	Bifunctional autolysin;Mannosyl-glycoprotein endo-beta-N-acetylglucosaminidase;N-acetylmuramoyl-L-alanine amidase	3D-structure;Cellwallbiogenesis/degradation;Completeproteome;Directproteinsequencing;Hydrolase;Multifunctionalenzyme;Referenceproteome;Repeat;Secreted;Signal	137.38	155	93.1	111880000000	3070	+	4.60634	-1.22911	0	24.6226	24.9398	25.0543	24.7859	26.0074	25.9822	26.1645	26.165
Q2FZL1	Q2FZL1	SAOUHSC_00989		Aminotransferase;Completeproteome;Pyridoxalphosphate;Referenceproteome;Transferase	43.19	10	31.2	494150000	50		0.54035	-0.486224	0.157544	20.3926	21.1306	20.7565	21.2468	21.8659	20.666	20.807	22.1323
Q2FZL5	Q2FZL5	menB	1.4-dihydroxy-2-naphthoyl-CoA synthase	Completeproteome;Isomerase;Lyase;Menaquinonebiosynthesis;Referenceproteome	30.425	28	86.4	57670000000	543		0.774383	-0.0929632	0.0850547	28.2217	28.3533	28.4105	28.3662	28.3209	28.4945	28.403	28.505
Q2FZL6	Q2FZL6	menH	Putative 2-succinyl-6-hydroxy-2.4-cyclohexadiene-1-carboxylate synthase	Completeproteome;Lyase;Menaquinonebiosynthesis;Referenceproteome	30.785	5	31.5	349730000	35	+	1.41626	0.516767	0.0179182	21.9991	21.6902	21.589	22.1049	21.3734	21.1022	21.098	21.7424
Q2FZL7	Q2FZL7	menD	2-succinyl-5-enolpyruvyl-6-hydroxy-3-cyclohexene-1-carboxylate synthase	Completeproteome;Magnesium;Manganese;Menaquinonebiosynthesis;Metal-binding;Referenceproteome;Thiaminepyrophosphate;Transferase	63.077	21	47	2860500000	239	+	4.07788	0.531993	0.000475096	23.3875	23.5869	23.3242	23.4648	22.9138	22.916	22.8952	22.9103
Q2FZL8	Q2FZL8	SAOUHSC_00982		Completeproteome;Referenceproteome	46.618	11	33.5	1278200000	95	+	2.99562	0.597744	0.000719008	23.3589	23.1923	23.028	22.9846	22.4693	22.6985	22.5246	22.4804
Q2FZM0	Q2FZM0	menA	1.4-dihydroxy-2-naphthoate octaprenyltransferase	Cellmembrane;Completeproteome;Membrane;Menaquinonebiosynthesis;Referenceproteome;Transferase;Transmembrane;Transmembranehelix	34.4	6	17.9	217390000	46	+	3.07307	-1.56397	0.000626609	20.2093	20.2031	19.315	19.4899	21.5424	21.4321	21.089	21.4097
Q2FZM1	Q2FZM1	SAOUHSC_00979		Completeproteome;Referenceproteome	21.356	6	48.6	334360000	22		0.433319	0.073884	0.214495	22.894	22.961	23.0745	23.1648	23.0853	22.8872	22.8888	22.9375
Q2FZM4	Q2FZM4	SAOUHSC_00976		Completeproteome;Referenceproteome	32.035	3	15.3	726180000	32	+	2.80528	0.472319	0.00114179	23.5922	23.5857	23.7522	23.8031	23.0572	23.3774	23.1792	23.23
Q2FZM6	Q2FZM6	SAOUHSC_00974		Completeproteome;Referenceproteome;Transferase	29.779	7	33.8	2102900000	53	+	2.48289	-0.503495	0.00204502	25.475	25.2916	25.0359	25.1593	25.8809	25.7211	25.6356	25.7383
Q2FZM7	Q2FZM7	SAOUHSC_00973		Completeproteome;Referenceproteome	27.727	9	46.8	1257600000	142		0.138916	-0.0685678	0.54946	23.4227	23.0451	23.462	23.2549	23.1562	23.0443	23.5183	23.7402
Q2FZM8	Q2FZM8	SAOUHSC_00972		Completeproteome;Referenceproteome	11.193	3	52.6	48061000	11		0.0580064	-0.0964007	0.762715	20.9306	19.9522	19.2087	20.7176	20.7878	18.9892	20.6963	20.7213
Q2FZN6	Q2FZN6	SAOUHSC_00964		Completeproteome;Referenceproteome	6.6766	7	91.4	16906000000	152	+	2.25458	0.763052	0.00285137	27.4975	27.7841	27.3313	26.9431	26.7048	26.5034	26.6369	26.6588
Q2FZN7	Q2FZN7	SAOUHSC_00963	Lipoate--protein ligase	ATP-binding;Completeproteome;Cytoplasm;Ligase;Nucleotide-binding;Referenceproteome;Transferase	37.927	20	73.2	16243000000	497	+	2.76342	-0.340142	0.00122569	25.8415	26.0742	25.9697	25.8401	26.3238	26.266	26.1927	26.3035
Q2FZP0	Q2FZP0	SAOUHSC_00960		Completeproteome;Referenceproteome	57.927	15	41.2	788410000	101	+	1.77726	0.249216	0.00817896	22.9073	22.5474	22.7237	22.7001	22.4544	22.4498	22.4542	22.5232
Q2FZP2	Q2FZP2	SAOUHSC_00958	Serine protease HtrA-like	Cellmembrane;Completeproteome;Hydrolase;Membrane;Protease;Referenceproteome;Serineprotease;Transmembrane;Transmembranehelix	86.459	28	38.8	5365300000	334	+	1.03289	-0.118065	0.0450916	25.0346	25.1479	25.1251	25.2147	25.1715	25.2864	25.3609	25.1757
Q2FZP4	Q2FZP4	prfC	Peptide chain release factor 3	Completeproteome;Cytoplasm;GTP-binding;Nucleotide-binding;Proteinbiosynthesis;Referenceproteome	59.601	35	65.8	14900000000	530	+	1.48458	-0.136337	0.0154077	26.1253	26.0626	26.1908	26.0464	26.1726	26.2173	26.3458	26.2347
Q2FZP6	Q2FZP6	murE	UDP-N-acetylmuramoyl-L-alanyl-D-glutamate--L-lysine ligase	3D-structure;ATP-binding;Cellcycle;Celldivision;Cellshape;Cellwallbiogenesis/degradation;Completeproteome;Cytoplasm;Ligase;Nucleotide-binding;Peptidoglycansynthesis;Referenceproteome	54.104	31	60	9584600000	471		0.84179	0.0777941	0.0728055	25.2298	25.2552	25.2824	25.321	25.0755	25.2026	25.2286	25.2705
Q2FZP7	Q2FZP7	ugtP	Processive diacylglycerol beta-glucosyltransferase	Carbohydratemetabolism;Cellmembrane;Completeproteome;Glycosyltransferase;Lipidbiosynthesis;Lipidmetabolism;Membrane;Referenceproteome;Transferase	44.547	4	12.3	192810000	26	+	1.73558	-0.916127	0.00887455	20.3006	21.1398	20.0743	21.0145	21.2416	21.5828	21.5835	21.7858
Q2FZP9	Q2FZP9	SAOUHSC_00951	Putative phosphoesterase SAOUHSC_00951	Completeproteome;Hydrolase;Referenceproteome	19.326	23	69.8	46661000000	535	+	4.04078	-0.38579	0.000459259	27.6487	27.6397	27.5649	27.6678	27.9412	28.075	28.0771	27.971
Q2FZQ2	Q2FZQ2	SAOUHSC_00948		Completeproteome;Referenceproteome	40.154	4	10.2	183220000	26		0.652508	-0.272502	0.115692	22.3153	21.8097	21.4739	21.9242	22.2744	22.0011	22.3712	21.9666
Q2FZQ3	Q2FZQ3	fabI	Enoyl-[acyl-carrier-protein] reductase [NADPH] FabI	Completeproteome;Fattyacidbiosynthesis;Fattyacidmetabolism;Lipidbiosynthesis;Lipidmetabolism;NAD;NADP;Oxidoreductase;Referenceproteome	28.022	41	97.3	136110000000	1071		0.091074	0.00901985	0.660546	29.4378	29.4067	29.4376	29.3805	29.3566	29.3417	29.464	29.4641
Q2FZQ4	Q2FZQ4	SAOUHSC_00946		Antiport;Cellmembrane;Completeproteome;Iontransport;Membrane;Referenceproteome;Transmembrane;Transport	68.678	6	17.1	229790000	22		0.5001	0.649723	0.174605	22.8657	22.8643	22.4708	20.4439	21.8865	21.4455	21.4233	21.2906
Q2FZQ5	Q2FZQ5	SAOUHSC_00945	Magnesium transporter MgtE	Cellmembrane;Completeproteome;Magnesium;Membrane;Metal-binding;Referenceproteome;Transmembrane;Transmembranehelix;Transport	51.435	6	16.9	542410000	69		0.161421	0.0865364	0.505324	22.4316	22.817	23.4193	22.8548	22.7694	22.8352	22.8637	22.7083
Q2FZQ7	Q2FZQ7	trpS	Tryptophan--tRNA ligase	Aminoacyl-tRNAsynthetase;ATP-binding;Completeproteome;Cytoplasm;Ligase;Nucleotide-binding;Proteinbiosynthesis;Referenceproteome	36.909	19	49.8	11331000000	408	+	6.03208	-0.772241	0	25.3987	25.4181	25.5021	25.4159	26.1619	26.1925	26.2944	26.175
Q2FZR3	Q2FZR3	SAOUHSC_00927		Completeproteome;Referenceproteome	61.571	6	17.4	204800000	10	+	1.88819	0.716183	0.00633166	22.6282	22.3772	22.3547	22.0818	21.7116	21.6836	22.0051	21.1768
Q2FZR4	Q2FZR4	SAOUHSC_00926		ATP-binding;Completeproteome;Nucleotide-binding;Referenceproteome;Transport	35.822	6	24.9	217960000	22		0.59026	-0.307537	0.137751	21.475	21.421	22.0083	21.1356	21.7963	21.7019	21.4971	22.2747
Q2FZR5	Q2FZR5	SAOUHSC_00925		ATP-binding;Completeproteome;Nucleotide-binding;Referenceproteome;Transport	40.202	5	18.9	108480000	27	+	2.15928	-1.12319	0.00380337	19.3452	20.0704	20.483	20.4624	21.0479	21.2411	21.4391	21.1256
Q2FZR9	Q2FZR9	SAOUHSC_00921	3-oxoacyl-[acyl-carrier-protein] synthase 2	Acyltransferase;Completeproteome;Fattyacidbiosynthesis;Fattyacidmetabolism;Lipidbiosynthesis;Lipidmetabolism;Referenceproteome;Transferase	43.739	44	81.9	120940000000	1290	+	2.37692	0.116196	0.00255267	28.7322	28.7893	28.7664	28.6964	28.6386	28.6222	28.6681	28.5906
Q2FZS0	Q2FZS0	fabH	3-oxoacyl-[acyl-carrier-protein] synthase 3	Acyltransferase;Completeproteome;Cytoplasm;Fattyacidbiosynthesis;Fattyacidmetabolism;Lipidbiosynthesis;Lipidmetabolism;Multifunctionalenzyme;Referenceproteome;Transferase	33.879	43	99	64049000000	908	+	4.06482	0.370703	0.000469697	28.0547	27.9413	28.0838	27.9675	27.626	27.6968	27.6413	27.6003
Q2FZS3	Q2FZS3	SAOUHSC_00917		Completeproteome;Referenceproteome	19.149	1	15.8	83708000	3		0.610167	-0.283409	0.129939	21.3554	20.9728	21.3491	21.2423	21.8732	20.9757	21.4425	21.7618
Q2FZS8	Q2FZS8	clpB	Chaperone protein ClpB	ATP-binding;Chaperone;Coiledcoil;Completeproteome;Cytoplasm;Hydrolase;Nucleotide-binding;Protease;Referenceproteome;Repeat;Stressresponse	98.33	68	70.1	23620000000	978	+	2.8736	-0.26377	0.000787645	26.0677	26.2025	26.1849	26.2583	26.4038	26.3968	26.4807	26.4872
Q2FZT0	Q2FZT0	SAOUHSC_00910		Completeproteome;Referenceproteome	9.6522	3	43.2	2557600000	65		0.384685	0.182495	0.245778	25.3416	26.1298	25.8704	25.6495	25.8105	25.5033	25.2513	25.6962
Q2FZT1	Q2FZT1	SAOUHSC_00909		Completeproteome;Referenceproteome	31.669	16	67.2	8256900000	318	+	1.58512	0.245803	0.0124464	25.2698	25.6182	25.4037	25.5319	25.2167	25.1131	25.2332	25.2774
Q2FZT4	Q2FZT4	SAOUHSC_00906	Uncharacterized protein SAOUHSC_00906	Completeproteome;Metal-binding;Referenceproteome	33.113	30	88	91865000000	661	+	3.57665	-0.450117	0.000504202	29.3343	29.2524	29.1738	29.1529	29.8041	29.6262	29.6491	29.6344
Q2FZT5	Q2FZT5	addA	ATP-dependent helicase/nuclease subunit A	ATP-binding;Completeproteome;DNA-binding;DNAdamage;DNArepair;Exonuclease;Helicase;Hydrolase;Nuclease;Nucleotide-binding;Referenceproteome	141.26	50	46.6	5982700000	395	+	2.82382	-0.416492	0.000981132	24.7906	25.06	24.8709	25.0458	25.3051	25.3441	25.3193	25.4647
Q2FZT6	Q2FZT6	addB	ATP-dependent helicase/deoxyribonuclease subunit B	4Fe-4S;ATP-binding;Completeproteome;DNAdamage;DNArepair;Exonuclease;Hydrolase;Iron;Iron-sulfur;Metal-binding;Nuclease;Nucleotide-binding;Referenceproteome	134.5	27	31.2	2103900000	210	+	2.21561	-0.393486	0.00332107	22.3641	22.1292	21.9582	22.3084	22.5669	22.625	22.6179	22.5241
Q2FZT7	Q2FZT7	SAOUHSC_00903	Signal peptidase I	Completeproteome;Hydrolase;Protease;Referenceproteome	17.598	18	92.3	8769400000	384	+	3.30721	-0.43117	0.000565947	25.2677	25.3786	25.4735	25.3366	25.6609	25.874	25.8149	25.8313
Q2FZT8	Q2FZT8	SAOUHSC_00902	Signal peptidase I	Completeproteome;Hydrolase;Membrane;Protease;Referenceproteome;Transmembrane;Transmembranehelix	20.109	4	23	178430000	13		0.656721	0.131301	0.114352	21.8734	21.9263	21.9676	21.8308	21.8759	21.7906	21.9023	21.5041
Q2FZU0	Q2FZU0	pgi	Glucose-6-phosphate isomerase	Completeproteome;Cytoplasm;Gluconeogenesis;Glycolysis;Isomerase;Referenceproteome	49.822	48	84.7	170000000000	1481	+	2.32301	0.241717	0.00255357	29.2835	29.4523	29.4499	29.3809	29.258	29.1522	29.0854	29.1042
Q2FZU1	Q2FZU1	argG	Argininosuccinate synthase	Amino-acidbiosynthesis;Argininebiosynthesis;ATP-binding;Completeproteome;Cytoplasm;Ligase;Nucleotide-binding;Referenceproteome	44.455	26	65.8	4844400000	259	+	6.06916	-1.97128	0	22.6416	22.9792	22.8227	22.5749	24.6798	24.7541	24.677	24.7927
Q2FZU2	Q2FZU2	argH	Argininosuccinate lyase	Amino-acidbiosynthesis;Argininebiosynthesis;Completeproteome;Cytoplasm;Lyase;Referenceproteome	52.016	15	43.6	2716300000	166	+	6.15781	-1.98192	0	23.2676	23.3809	23.4397	23.4348	25.3396	25.1371	25.4537	25.5202
Q2FZU3	Q2FZU3	SAOUHSC_00897		Completeproteome;Referenceproteome	35.31	4	23	461200000	10		0.61608	0.270707	0.127616	23.2731	23.7545	23.3547	23.1539	22.7931	23.1648	23.5457	22.9499
Q2FZU5	Q2FZU5	SAOUHSC_00895	Glutamate dehydrogenase	Completeproteome;Oxidoreductase;Referenceproteome	45.76	44	60.9	54412000000	874	+	4.88881	-0.324658	0	27.9543	27.9431	27.91	27.9798	28.2512	28.3224	28.2837	28.2285
Q2FZU6	Q2FZU6	rocD	Ornithine aminotransferase	Amino-acidbiosynthesis;Aminotransferase;Completeproteome;Cytoplasm;Prolinebiosynthesis;Pyridoxalphosphate;Referenceproteome;Transferase	43.417	31	62.4	38574000000	615	+	5.13264	-1.13945	0	27.202	27.1085	27.1525	27.2455	28.1308	28.4022	28.4638	28.2695
Q2FZU7	Q2FZU7	SAOUHSC_00893		Completeproteome;Referenceproteome	42.109	24	75.2	8149800000	423	+	4.28088	0.42707	0.000306306	25.2146	25.28	25.2387	25.2742	24.7888	24.7327	24.9009	24.8768
Q2FZU8	Q2FZU8	SAOUHSC_00892		Completeproteome;Referenceproteome	13.427	5	64.9	1599800000	65	+	1.86098	0.665884	0.00688418	24.6884	24.9344	24.3807	24.5479	24.0662	23.9212	24.3191	23.5814
Q2FZU9	Q2FZU9	SAOUHSC_00891	Putative peptidyl-prolyl cis-trans isomerase	Completeproteome;Isomerase;Referenceproteome;Rotamase	21.619	17	68	37178000000	459	+	1.86861	0.255858	0.00662172	27.8056	27.898	27.9617	27.6423	27.598	27.6301	27.5213	27.5346
Q2FZV0	Q2FZV0	SAOUHSC_00890		Completeproteome;Referenceproteome	14.905	13	66.9	4469800000	194		0.751131	0.209019	0.0899967	24.5574	24.8669	24.5974	25.0685	24.4689	24.7129	24.4405	24.6319
Q2FZV1	Q2FZV1	mnhA1	Na(+)/H(+) antiporter subunit A1	Antiport;Cellmembrane;Completeproteome;Hydrogeniontransport;Iontransport;Membrane;Referenceproteome;Sodium;Sodiumtransport;Transmembrane;Transmembranehelix;Transport	89.395	3	3.5	129400000	20		0.110643	-0.272892	0.612388	21.6257	19.6833	19.9819	22.3437	19.9419	22.3784	20.1786	22.2273
Q2FZV4	Q2FZV4	SAOUHSC_00881		Completeproteome;Referenceproteome	13.545	3	21.8	499300000	44	+	2.95936	-0.89387	0.000698795	22.0358	22.4521	22.6776	22.379	23.3279	23.432	23.0741	23.286
Q2FZV6	Q2FZV6	SAOUHSC_00879	Leucine aminopeptidase 3. chloroplastic	Aminopeptidase;Completeproteome;Cytoplasm;Hydrolase;Manganese;Metal-binding;Protease;Referenceproteome	54.128	27	54.6	9770200000	442	+	2.91045	-0.723996	0.000683694	23.8094	24.2913	24.1896	24.3733	24.8523	24.948	24.8926	24.8667
Q2FZV7	Q2FZV7	SAOUHSC_00878	NADH dehydrogenase-like protein SAOUHSC_00878	Completeproteome;FAD;Flavoprotein;Oxidoreductase;Referenceproteome	44.104	38	54.7	108660000000	829	+	2.82182	-0.310616	0.00107721	29.2978	29.2367	29.3005	29.413	29.5301	29.586	29.6439	29.7305
Q2FZV8	Q2FZV8	SAOUHSC_00877		Completeproteome;Referenceproteome	12.485	7	72.3	1704300000	77		0.0729974	-0.0401387	0.714793	25.3292	24.9966	24.5687	24.5232	24.9982	24.7722	24.9415	24.8664
Q2FZW0	Q2FZW0	SAOUHSC_00875		Completeproteome;Referenceproteome	39.399	24	64.4	6602100000	340	+	3.07383	-0.785613	0.000627957	24.2857	24.5283	24.4757	24.7592	25.1107	25.2472	25.5055	25.3278
Q2FZW1	Q2FZW1	SAOUHSC_00874		Completeproteome;Referenceproteome	12.602	5	48.6	1246300000	35		0.458187	-0.115012	0.198893	24.7117	25.1324	24.7665	24.8667	24.9649	25.169	24.919	24.8846
Q2FZW2	Q2FZW2	SAOUHSC_00873		Completeproteome;Referenceproteome	8.7409	3	50	8915400000	76		0.153765	0.0644288	0.52092	26.4711	26.908	26.8893	26.3904	26.7353	26.3751	26.727	26.5637
Q2FZW3	Q2FZW3	SAOUHSC_00872		Completeproteome;Referenceproteome	44.946	29	55.2	20903000000	531	+	5.14898	-0.43041	0	25.9854	26.0718	26.0331	25.9839	26.3928	26.4454	26.4942	26.4633
Q2FZW4	Q2FZW4	dltC	D-alanine--poly(phosphoribitol) ligase subunit 2	ATP-binding;Cellshape;Cellwallbiogenesis/degradation;Completeproteome;Ligase;Nucleotide-binding;Phosphopantetheine;Phosphoprotein;Referenceproteome	9.0631	2	33.3	583870000	18	+	1.16567	-0.380459	0.0320922	23.9044	23.3126	23.8268	23.3454	23.9079	23.9027	24.192	23.9084
Q2FZW5	Q2FZW5	SAOUHSC_00870		Completeproteome;Referenceproteome	47.774	2	6.2	293510000	28	+	1.05003	-0.384464	0.0429365	21.8313	22.0963	22.5901	22.2961	22.4287	22.7447	22.3966	22.7815
Q2FZW6	Q2FZW6	dltA	D-alanine--poly(phosphoribitol) ligase subunit 1	ATP-binding;Completeproteome;Cytoplasm;Ligase;Nucleotide-binding;Referenceproteome	54.67	39	59.4	22097000000	660	+	2.80775	-0.315258	0.00114607	26.7757	26.8532	26.8625	26.6565	27.0869	27.1791	27.1192	27.0237
Q2FZW9	Q2FZW9	SAOUHSC_00866		Completeproteome;Referenceproteome	32.483	5	14.3	2691500000	92		0.0130242	0.00764227	0.940741	24.3017	24.8654	24.9258	24.8107	24.4138	24.884	25.0042	24.571
Q2FZX0	Q2FZX0	nagD	Protein NagD homolog	Completeproteome;Referenceproteome	27.945	13	55.2	23982000000	295	+	0.999865	-0.147106	0.0488522	27.4084	27.7025	27.7052	27.665	27.7484	27.8439	27.7336	27.7436
Q2FZX1	Q2FZX1	SAOUHSC_00864		Completeproteome;Referenceproteome	16.791	8	70.1	1142200000	51		0.107275	-0.0333037	0.621806	24.1811	24.4898	24.2797	24.2886	24.4422	24.2669	24.5455	24.1179
Q2FZX3	Q2FZX3	SAOUHSC_00862		Completeproteome;Referenceproteome	15.401	5	43.3	1566400000	153		0.048083	-0.00621843	0.798461	23.1472	23.2879	23.168	23.2141	23.2207	23.2933	23.1356	23.1924
Q2FZX4	Q2FZX4	lipA	Lipoyl synthase	4Fe-4S;Completeproteome;Cytoplasm;Iron;Iron-sulfur;Metal-binding;Referenceproteome;S-adenosyl-L-methionine;Transferase	34.885	36	66.9	19961000000	605	+	5.17641	0.285988	0	26.4358	26.4753	26.5121	26.4606	26.1741	26.1773	26.2192	26.1693
Q2FZX5	Q2FZX5	SAOUHSC_00860		Completeproteome;Referenceproteome	50.139	9	36	1457900000	78	+	1.81821	-0.408369	0.00776819	23.6493	23.9002	23.6187	23.3839	24.0369	23.9754	23.9546	24.2187
Q2FZX7	Q2FZX7	SAOUHSC_00858		Completeproteome;Referenceproteome	33.316	7	24.8	532830000	48	+	2.75327	-1.66973	0.00128727	20.4472	21.6291	20.681	21.5989	22.808	22.9074	22.6599	22.6598
Q2FZX9	Q2FZX9	SAOUHSC_00855	Probable nitronate monooxygenase	Completeproteome;Flavoprotein;FMN;Monooxygenase;Oxidoreductase;Referenceproteome	38.548	13	67.6	1863500000	114	+	1.16251	-0.332863	0.0321457	23.8608	23.9474	23.8617	23.3254	23.9903	24.0797	24.2137	24.0431
Q2FZY3	Q2FZY3	SAOUHSC_00851	UPF0051 protein SAOUHSC_00851	Completeproteome;Referenceproteome	52.531	48	78.7	52870000000	964	+	6.3523	0.916264	0	28.4367	28.3881	28.4729	28.3013	27.5032	27.5018	27.4413	27.4876
Q2FZY4	Q2FZY4	SAOUHSC_00850		Completeproteome;Referenceproteome	17.016	8	64.9	6481900000	118	+	4.96945	0.898438	0	26.7309	26.7008	26.5952	26.8778	25.8627	25.8566	25.7284	25.8633
Q2FZY5	Q2FZY5	SAOUHSC_00849	Cysteine desulfurase	Aminotransferase;Completeproteome;Pyridoxalphosphate;Referenceproteome;Transferase	46.618	30	67.1	20425000000	539	+	6.99997	1.24015	0	27.0688	27.2356	27.1157	27.2278	25.9021	25.9254	25.9344	25.9254
Q2FZY6	Q2FZY6	SAOUHSC_00848		Completeproteome;Referenceproteome	48.548	44	80.9	34382000000	758	+	7.99966	0.974388	0	28.4258	28.4483	28.4664	28.4833	27.5269	27.4374	27.4706	27.4914
Q2FZY7	Q2FZY7	SAOUHSC_00847		ATP-binding;Completeproteome;Nucleotide-binding;Referenceproteome	28.275	33	99.6	109600000000	782	+	8.49813	1.02401	0	29.501	29.5393	29.577	29.5531	28.5443	28.5021	28.4976	28.5304
Q2FZY9	Q2FZY9	SAOUHSC_00845	UPF0337 protein SAOUHSC_00845	Completeproteome;Referenceproteome	7.0186	15	92.2	12429000000	164	+	3.60032	-1.4621	0.000511364	25.282	25.0371	24.6588	24.8876	26.7633	26.4359	26.4251	26.0896
Q2FZZ0	Q2FZZ0	SAOUHSC_00844	Lipoprotein	Completeproteome;Lipoprotein;Referenceproteome	30.351	12	44	651800000	109		0.614074	-0.133617	0.128574	22.738	22.9788	22.6474	23.0301	23.0572	22.8755	22.9356	23.0605
Q2FZZ2	Q2FZZ2	metN2	Methionine import ATP-binding protein MetN 2	Amino-acidtransport;ATP-binding;Cellmembrane;Completeproteome;Hydrolase;Membrane;Nucleotide-binding;Referenceproteome;Transport	38.209	7	26.1	220210000	35	+	1.76993	-0.843235	0.00813959	21.7073	22.0869	21.6009	21.816	22.3167	22.1879	23.177	22.9026
Q2FZZ3	Q2FZZ3	SAOUHSC_00841		Completeproteome;Referenceproteome	11.454	1	10.2	55039000	19	+	2.04018	0.72419	0.00472825	20.9815	21.1188	20.7602	21.2394	20.1297	20.4719	19.9446	20.657
Q2FZZ6	Q2FZZ6	SAOUHSC_00838		Completeproteome;Referenceproteome	33.501	14	40.4	7904400000	208	+	7.0561	2.20176	0	26.6855	26.8706	26.8631	26.8903	24.5637	24.6891	24.5048	24.7448
Q2FZZ8	Q2FZZ8	gcvH	Glycine cleavage system H protein	Completeproteome;Lipoyl;Referenceproteome	14.092	10	62.7	31453000000	214		0.894727	-0.150843	0.0642271	27.9683	28.0863	28.0035	27.6937	28.086	28.0743	28.1016	28.0933
Q2FZZ9	Q2FZZ9	SAOUHSC_00835		Completeproteome;Referenceproteome	13.6	14	87.3	14680000000	258	+	1.45197	-0.339107	0.0167354	27.3342	27.2284	26.8246	26.983	27.5104	27.4839	27.4382	27.2942
Q2G000	Q2G000	SAOUHSC_00834		Completeproteome;Referenceproteome	12.141	8	48.1	4323000000	117		0.171415	-0.0984921	0.487246	25.8506	25.665	25.4698	25.0525	25.823	25.2847	25.8718	25.4523
Q2G001	Q2G001	SAOUHSC_00833		Completeproteome;Referenceproteome	20.749	7	35.2	2222600000	81	+	2.68527	0.639588	0.00132399	25.4234	25.0383	25.301	25.2368	24.6069	24.6356	24.3705	24.8281
Q2G003	Q2G003	SAOUHSC_00825		Completeproteome;Referenceproteome	7.9018	1	26.9	59314000	2	+	1.29639	-0.70397	0.0236086	20.8995	20.1109	20.6768	21.2601	21.5479	21.0801	21.3125	21.8228
Q2G007	Q2G007	SAOUHSC_00821		Completeproteome;Referenceproteome	11.208	2	25.5	114280000	10	+	1.13572	-0.87572	0.0344782	18.5488	18.3838	19.0504	20.1382	19.9639	19.8264	19.7318	20.102
Q2G008	Q2G008	SAOUHSC_00820		Completeproteome;Referenceproteome	8.043	2	43.1	123720000	11	+	1.63015	-1.81116	0.010967	19.1219	20.8374	20.7473	18.6326	21.6631	21.4177	22.2278	21.2754
Q2G009	Q2G009	SAOUHSC_00819		Completeproteome;Cytoplasm;Referenceproteome	7.374	6	98.5	2202100000	71	+	3.10967	-0.769433	0.000644592	24.6991	24.9308	24.6391	24.9207	25.574	25.482	25.8336	25.378
Q2G012	Q2G012	emp	Extracellular matrix protein-binding protein emp	Completeproteome;Referenceproteome;Signal	38.484	5	23.5	97917000	25		0.301852	0.158034	0.319123	19.9942	20.7341	20.1362	20.7297	20.2238	20.4494	19.9678	20.3212
Q2G015	Q2G015	clfA	Clumping factor A	3D-structure;Cellwall;Completeproteome;Peptidoglycan-anchor;Referenceproteome;Secreted;Signal;Virulence	96.446	4	7.1	390630000	17	+	1.09645	1.53191	0.0387029	23.0962	22.7344	22.8374	22.5308	22.039	19.1128	21.9295	21.99
Q2G016	Q2G016	SAOUHSC_00811		Completeproteome;Referenceproteome	19.928	11	64.2	3455000000	174	+	4.6639	1.86292	0	24.8492	24.6761	25.1201	24.6876	22.6729	23.1922	23.1238	22.8924
Q2G019	Q2G019	SAOUHSC_00808		3D-structure;Completeproteome;Referenceproteome	28.419	10	42.1	1976400000	99		0.293896	0.0634785	0.326745	24.7492	24.7526	24.5594	24.7236	24.6319	24.8511	24.5021	24.5458
Q2G021	Q2G021	SAOUHSC_00806		Completeproteome;Referenceproteome	12.869	9	73.8	1016300000	80	+	1.32331	0.206722	0.0224303	23.6388	23.7006	23.911	23.8032	23.3924	23.6582	23.5658	23.6102
Q2G023	Q2G023	smpB	SsrA-binding protein	Completeproteome;Cytoplasm;Referenceproteome;RNA-binding	17.755	14	67.5	2099100000	176		0.141875	-0.050869	0.544033	22.9333	23.5018	23.5069	23.2855	23.3354	23.3273	23.4089	23.3593
Q2G024	Q2G024	rnr	Ribonuclease R	Completeproteome;Cytoplasm;Exonuclease;Hydrolase;Nuclease;Referenceproteome;RNA-binding	90.434	32	39	4308900000	393	+	2.57463	0.289413	0.0016755	23.7795	23.7068	23.7501	23.8923	23.4869	23.6015	23.4941	23.3885
Q2G025	Q2G025	SAOUHSC_00802		Completeproteome;Hydrolase;Referenceproteome	28.094	8	32.5	2580500000	171	+	2.63638	0.495636	0.00151443	24.4963	24.6136	24.8363	24.419	24.1477	24.1305	24.1162	23.9883
Q2G026	Q2G026	SAOUHSC_00801	Protein translocase subunit SecG	Cellmembrane;Completeproteome;Membrane;Proteintransport;Referenceproteome;Translocation;Transmembrane;Transmembranehelix;Transport	10.106	3	31.9	469710000	17	+	1.67848	-0.435686	0.0100741	22.4374	22.2842	22.3249	22.2529	23.0879	22.7344	22.7881	22.4318
Q2G028	Q2G028	eno	Enolase	Completeproteome;Cytoplasm;Glycolysis;Lyase;Magnesium;Metal-binding;Referenceproteome;Secreted;Virulence	47.116	60	85.9	833900000000	2638	+	4.88924	0.436675	0	31.3364	31.4162	31.3438	31.4695	30.9653	30.982	30.9396	30.9323
Q2G029	Q2G029	gpmI	2.3-bisphosphoglycerate-independent phosphoglycerate mutase	3D-structure;Completeproteome;Glycolysis;Isomerase;Manganese;Metal-binding;Referenceproteome	56.423	33	67.5	34742000000	667		0.230009	0.0434756	0.401956	27.8983	27.8278	27.7862	27.8473	28.0057	27.6805	27.7776	27.722
Q2G030	Q2G030	tpiA	Triosephosphate isomerase	Completeproteome;Cytoplasm;Gluconeogenesis;Glycolysis;Isomerase;Pentoseshunt;Referenceproteome	27.291	30	83.8	104520000000	754		0.409507	-0.0658646	0.23037	28.7536	28.9833	28.8696	28.8208	29.0463	28.9112	28.9398	28.7935
Q2G031	Q2G031	pgk	Phosphoglycerate kinase	ATP-binding;Completeproteome;Cytoplasm;Glycolysis;Kinase;Nucleotide-binding;Referenceproteome;Transferase	42.601	42	76.8	94601000000	1007		0.163297	-0.0293751	0.501164	28.7211	28.917	28.7507	28.711	28.9483	28.7777	28.7742	28.7172
Q2G032	Q2G032	SAOUHSC_00795	Glyceraldehyde-3-phosphate dehydrogenase	Completeproteome;Oxidoreductase;Referenceproteome	36.28	44	93.5	710850000000	1789	+	1.1292	0.186339	0.0348717	31.9136	31.8257	31.7441	31.5646	31.6525	31.6456	31.4744	31.5301
Q2G033	Q2G033	SAOUHSC_00794		Completeproteome;Referenceproteome	37.21	17	44.2	1635100000	144		0.422695	-0.0696654	0.221485	23.8516	23.9585	23.8829	23.9901	23.972	23.9149	23.8936	24.1812
Q2G035	Q2G035	SAOUHSC_00792	Epimerase family protein SAOUHSC_00792	Completeproteome;Referenceproteome	34.227	19	66	4737100000	200	+	4.02608	-0.464355	0.000454212	24.2537	24.3264	24.4313	24.4469	24.8718	24.861	24.7864	24.7965
Q2G036	Q2G036	clpP	ATP-dependent Clp protease proteolytic subunit	3D-structure;Completeproteome;Cytoplasm;Hydrolase;Protease;Referenceproteome;Serineprotease	21.513	22	68.2	133790000000	592		0.444363	-0.0246868	0.207449	30.4264	30.4545	30.3851	30.4653	30.4831	30.4883	30.4151	30.4437
Q2G037	Q2G037	whiA	Putative sporulation transcription regulator WhiA	Completeproteome;DNA-binding;Referenceproteome;Transcription;Transcriptionregulation	35.868	12	51.9	3281000000	181	+	2.06467	0.397701	0.00461081	24.5003	24.316	24.6204	24.6297	23.955	24.0581	24.1633	24.2991
Q2G038	Q2G038	SAOUHSC_00788	Gluconeogenesis factor	Completeproteome;Cytoplasm;Referenceproteome	36.26	5	25.4	998020000	69	+	1.80682	-0.640688	0.00792638	22.338	22.8809	22.5863	23.0452	23.6347	23.1772	23.4241	23.1771
Q2G039	Q2G039	SAOUHSC_00787	Nucleotide-binding protein SAOUHSC_00787	ATP-binding;Completeproteome;GTP-binding;Nucleotide-binding;Referenceproteome	34.812	13	41.9	13174000000	178	+	0.987726	-0.22742	0.0499353	27.7157	28.0238	28.0028	28.1856	28.1194	28.0771	28.2814	28.3597
Q2G041	Q2G041	SAOUHSC_00785	Thioredoxin reductase	Completeproteome;FAD;Flavoprotein;NADP;Oxidoreductase;Redox-activecenter;Referenceproteome	33.616	31	84.6	55052000000	796		0.396608	0.0441952	0.237756	28.0176	28.0811	28.1137	28.2183	28.0571	28.1346	28.0162	28.0459
Q2G042	Q2G042	SAOUHSC_00784		Completeproteome;Referenceproteome	57.061	5	9	432820000	26	+	1.51859	-0.594233	0.014658	21.6456	21.4635	21.8061	22.0434	22.1075	22.8418	22.222	22.1642
Q2G044	Q2G044	lgt	Prolipoprotein diacylglyceryl transferase	Cellmembrane;Completeproteome;Membrane;Referenceproteome;Transferase;Transmembrane;Transmembranehelix	31.572	5	21.1	1048200000	77	+	1.44207	-0.257287	0.0170328	22.9591	23.1055	23.1306	23.2846	23.2971	23.5739	23.3675	23.2704
Q2G045	Q2G045	hprK	HPr kinase/phosphorylase	ATP-binding;Carbohydratemetabolism;Completeproteome;Kinase;Magnesium;Metal-binding;Multifunctionalenzyme;Nucleotide-binding;Referenceproteome;Serine/threonine-proteinkinase;Transferase	34.481	30	77.1	11000000000	352		0.336424	0.0810509	0.284663	25.2426	25.3829	25.5827	25.6266	25.3878	25.5172	25.3144	25.2913
Q2G046	Q2G046	uvrA	UvrABC system protein A	ATP-binding;Completeproteome;Cytoplasm;DNA-binding;DNAdamage;DNAexcision;DNArepair;Excisionnuclease;Metal-binding;Nucleotide-binding;Referenceproteome;Repeat;SOSresponse;Zinc;Zinc-finger	105.37	63	67	10230000000	579	+	5.20567	-0.591135	0	24.3328	24.1841	24.2738	24.3303	24.8136	24.9067	24.8795	24.8858
Q2G047	Q2G047	SAOUHSC_00779	UvrABC system protein B	ATP-binding;Completeproteome;Cytoplasm;DNAdamage;DNAexcision;DNArepair;Excisionnuclease;Nucleotide-binding;Referenceproteome;SOSresponse	37.477	18	52.5	2937400000	157	+	4.84617	-0.657424	0	23.9329	24.0765	23.9967	24.0782	24.5769	24.6649	24.7389	24.7333
Q2G050	Q2G050	SAOUHSC_00776		Completeproteome;Referenceproteome	39.816	10	30.6	1084000000	62		0.266961	-0.196278	0.354506	22.4358	22.966	23.2774	23.1661	22.8796	22.6507	23.6909	23.4092
Q2G052	Q2G052	SAOUHSC_00771	Peptide chain release factor 2	Completeproteome;Cytoplasm;Proteinbiosynthesis;Referenceproteome	33.212	14	48.1	1353700000	101		0.658963	-0.163295	0.113306	23.0201	23.1575	22.8322	23.1268	23.2959	23.1612	23.3813	22.9514
Q2G055	Q2G055	SAOUHSC_00767	Uncharacterized protein SAOUHSC_00767	Completeproteome;Referenceproteome	22.213	27	93.2	81220000000	794	+	1.15101	0.12087	0.0327717	29.6765	29.7054	29.7046	29.7854	29.493	29.6439	29.7127	29.5389
Q2G059	Q2G059	SAOUHSC_00763		Completeproteome;Referenceproteome	23.868	10	50.7	1194600000	120	+	2.22335	0.476702	0.00334473	23.6712	23.7275	23.9406	23.8092	23.1821	23.604	23.2458	23.2099
Q2G060	Q2G060	SAOUHSC_00762		Completeproteome;Referenceproteome	38.528	3	5.7	172620000	13		0.618884	0.381825	0.127167	22.2934	21.1866	21.8644	21.5749	21.0931	21.8706	21.1799	21.2484
Q2G061	Q2G061	SAOUHSC_00760	Uncharacterized membrane protein SAOUHSC_00760	Cellmembrane;Completeproteome;Membrane;Referenceproteome;Transmembrane;Transmembranehelix	40.345	12	39.6	1115600000	75	+	1.5516	-0.300343	0.0138222	23.3063	23.4984	23.6438	23.773	23.8467	23.9334	23.85	23.7929
Q2G062	Q2G062	SAOUHSC_00759		Completeproteome;Referenceproteome	27.427	3	13	175380000	10	+	1.37324	-0.476223	0.0198638	21.7333	21.9363	22.1488	21.9452	22.1473	22.3264	22.2977	22.8971
Q2G064	Q2G064	pepT	Peptidase T	Aminopeptidase;Completeproteome;Cytoplasm;Hydrolase;Metal-binding;Metalloprotease;Protease;Referenceproteome;Zinc	45.847	15	40.7	5670500000	194	+	1.55519	0.154554	0.0136018	26.0771	26.1086	26.0442	26.0009	25.9949	25.9279	25.7667	25.923
Q2G065	Q2G065	SAOUHSC_00756		Completeproteome;Referenceproteome	41.797	17	37.4	4497700000	240	+	4.56303	-0.676484	0	24.4405	24.3169	24.4952	24.5351	25.0883	25.0635	25.1167	25.2251
Q2G066	Q2G066	SAOUHSC_00755		Completeproteome;Referenceproteome	12.437	8	64.2	1842900000	65		0.403376	-0.18014	0.23363	24.6482	24.1464	24.1617	23.7049	24.2569	24.4472	24.3521	24.3256
Q2G067	Q2G067	SAOUHSC_00754		Completeproteome;Referenceproteome	34.082	11	40.4	502580000	59	+	1.4463	-0.240938	0.016878	21.8048	22.0063	21.9304	22.1341	22.3779	22.1774	22.154	22.1302
Q2G069	Q2G069	murB	UDP-N-acetylenolpyruvoylglucosamine reductase	Cellcycle;Celldivision;Cellshape;Cellwallbiogenesis/degradation;Completeproteome;Cytoplasm;FAD;Flavoprotein;NADP;Oxidoreductase;Peptidoglycansynthesis;Referenceproteome	33.797	22	57.7	10253000000	390	+	1.78516	-0.189143	0.00812591	25.1311	25.232	24.9802	25.1446	25.3432	25.3542	25.2525	25.2946
Q2G071	Q2G071	SAOUHSC_00749		Completeproteome;Referenceproteome	37.854	25	65.5	5744800000	409	+	2.33625	0.270756	0.00257271	25.304	25.1862	25.1011	25.1255	24.9717	24.8675	24.8104	24.9841
Q2G077	Q2G077	SAOUHSC_00743		Completeproteome;Oxidoreductase;Referenceproteome	37.513	32	83.9	27342000000	595		0.16769	0.0242467	0.494447	26.5766	26.6476	26.4403	26.523	26.5863	26.5652	26.4306	26.5083
Q2G078	Q2G078	SAOUHSC_00742	Ribonucleoside-diphosphate reductase	Completeproteome;DNAreplication;Oxidoreductase;Referenceproteome	82.604	56	63.1	56867000000	1067	+	4.69615	0.237987	0	28.1406	28.1643	28.203	28.1906	27.9304	27.9431	27.9027	27.9704
Q2G079	Q2G079	nrdI	Protein NrdI	Completeproteome;Referenceproteome	15.166	2	26.5	292380000	35		0.0671058	0.0429821	0.734148	22.5309	22.5026	22.6346	22.7596	22.6109	22.5215	23.1004	22.023
Q2G081	Q2G081	queF	NADPH-dependent 7-cyano-7-deazaguanine reductase	Completeproteome;Cytoplasm;NADP;Oxidoreductase;Queuosinebiosynthesis;Referenceproteome	19.645	7	54.2	5970300000	137	+	3.16498	-0.780946	0.000657658	24.6073	24.6953	24.7469	24.8581	25.2317	25.6127	25.4456	25.7412
Q2G082	Q2G082	SAOUHSC_00738		Completeproteome;Membrane;Referenceproteome;Transmembrane;Transport	54.828	6	15.8	966240000	81	+	3.93112	-1.52368	0.000418919	22.1313	22.6549	22.3498	22.8792	24.1013	24.0637	23.877	24.0681
Q2G084	Q2G084	SAOUHSC_00736	Putative lipid kinase SAOUHSC_00736	ATP-binding;Completeproteome;Kinase;Lipidbiosynthesis;Lipidmetabolism;Magnesium;Metal-binding;Nucleotide-binding;Phospholipidbiosynthesis;Phospholipidmetabolism;Referenceproteome;Transferase	33.626	4	12.1	365690000	24	+	3.82492	-1.97318	0.0004	20.9528	20.0873	20.4064	20.3366	22.4334	22.3011	22.1277	22.8137
Q2G087	Q2G087	hisC	Histidinol-phosphate aminotransferase	Amino-acidbiosynthesis;Aminotransferase;Completeproteome;Histidinebiosynthesis;Pyridoxalphosphate;Referenceproteome;Transferase	39.788	8	34.9	404210000	34	+	1.04591	0.291084	0.0433792	22.2861	22.2918	22.4876	22.3383	21.9822	22.196	22.3441	21.7172
Q2G088	Q2G088	SAOUHSC_00732		Completeproteome;Membrane;Referenceproteome;Transmembrane;Transmembranehelix;Transport	56.057	8	16.7	607340000	43	+	4.39287	-0.795795	0.000333333	22.124	21.9884	22.2669	22.1603	23.0103	23.0023	22.8078	22.9024
Q2G089	Q2G089	SAOUHSC_00731		ATP-binding;Completeproteome;Nucleotide-binding;Referenceproteome	37.538	8	26.5	1451700000	105	+	3.58387	-0.734438	0.000509915	23.1071	23.3286	22.9154	23.0613	23.7298	23.9324	23.8767	23.8113
Q2G090	Q2G090	SAOUHSC_00730		ATP-binding;Completeproteome;Helicase;Hydrolase;Nucleotide-binding;Referenceproteome	68.169	10	24.8	990500000	136	+	1.41518	0.362779	0.0179413	22.368	22.3574	22.6859	22.6306	22.0281	21.9115	22.2811	22.3701
Q2G091	Q2G091	SAOUHSC_00729		ATP-binding;Completeproteome;Nucleotide-binding;Referenceproteome	72.597	37	59.8	5981700000	452	+	5.98853	0.861972	0	24.7065	24.6098	24.6737	24.7018	23.7567	23.7907	23.7764	23.92
Q2G093	Q2G093	ltaS	Glycerol phosphate lipoteichoic acid synthase;Lipoteichoic acid synthase;Processed glycerol phosphate lipoteichoic acid synthase	Cellmembrane;Cellwallbiogenesis/degradation;Completeproteome;Manganese;Membrane;Metal-binding;Referenceproteome;Secreted;Transferase;Transmembrane;Transmembranehelix	74.399	22	37.3	1573000000	199	+	1.51679	0.278976	0.0146782	23.2344	23.2046	23.1645	23.2943	22.941	22.7551	22.8795	23.2062
Q2G094	Q2G094	SAOUHSC_00727		Completeproteome;Referenceproteome	38.133	17	48.2	2788900000	164		0.708072	-0.135566	0.100075	23.9252	24.2443	24.2295	24.1942	24.4079	24.3451	24.1983	24.184
Q2G095	Q2G095	SAOUHSC_00726		Completeproteome;Referenceproteome	27.123	8	36.4	1526900000	107		0.50654	0.114299	0.171256	23.5915	23.8286	23.7524	23.7258	23.359	23.7022	23.7761	23.6038
Q2G097	Q2G097	SAOUHSC_00724		Completeproteome;Referenceproteome	23.84	4	20.8	54055000	18	+	1.69763	-0.583867	0.00979505	20.1176	20.0921	19.9126	20.2397	20.3042	20.7353	20.536	21.1219
Q2G098	Q2G098	SAOUHSC_00723		Completeproteome;Referenceproteome	43.965	6	26.1	218560000	59	+	1.18465	-0.504723	0.0307466	21.3706	20.5877	21.4186	20.7268	21.5901	21.3617	21.5122	21.6585
Q2G099	Q2G099	SAOUHSC_00722		Completeproteome;Glutamineamidotransferase;Lyase;Referenceproteome;Transferase	22.377	1	9.1	78135000	1	+	1.61118	-1.4462	0.0114266	21.8532	20.591	19.5324	20.4934	22.0268	22.0445	21.8761	22.3075
Q2G0A0	Q2G0A0	SAOUHSC_00705	Cys-tRNA(Pro)/Cys-tRNA(Cys) deacylase	Completeproteome;Lyase;Proteinbiosynthesis;Referenceproteome	17.751	10	61.9	1495800000	152	+	2.33173	0.482295	0.00256502	23.464	23.7754	23.7221	23.9779	23.2507	23.2075	23.3393	23.2127
Q2G0A3	Q2G0A3	SAOUHSC_00702		Completeproteome;Referenceproteome	15.452	5	45	294470000	26		0.5699	-0.776109	0.144365	22.3863	21.9257	22.5736	19.8358	22.3082	22.3057	22.7292	22.4826
Q2G0A6	Q2G0A6	SAOUHSC_00699		Chromophore;Completeproteome;FAD;Flavoprotein;Lyase;Referenceproteome	54.369	15	33.9	2419500000	219	+	3.31382	0.805967	0.000571429	23.5179	23.7106	23.9594	23.8997	22.8226	22.9165	23.117	23.0076
Q2G0A9	Q2G0A9	SAOUHSC_00696		Completeproteome;Referenceproteome	34.777	13	45.7	1728500000	129		0.0781396	-0.0648727	0.69883	22.193	22.9754	23.3309	23.469	22.7978	23.1169	23.1515	23.1616
Q2G0B0	Q2G0B0	SAOUHSC_00695		Completeproteome;Referenceproteome	35.224	2	6.8	57581000	17	+	1.07625	-0.259082	0.0406165	20.1099	20.1258	20.235	20.3402	20.5288	20.3347	20.7479	20.2358
Q2G0B1	Q2G0B1	mgrA	HTH-type transcriptional regulator MgrA	Activator;Completeproteome;Cytoplasm;Directproteinsequencing;DNA-binding;Referenceproteome;Repressor;Transcription;Transcriptionregulation;Virulence	17.089	25	100	53874000000	525	+	1.92064	-0.316514	0.00616751	27.6875	27.9605	27.992	28.0642	28.2386	28.1885	28.2045	28.3385
Q2G0B2	Q2G0B2	SAOUHSC_00693		Completeproteome;Referenceproteome	63.285	4	10.2	366820000	33	+	1.27898	-0.422295	0.024275	22.0636	22.1754	22.1546	22.6973	22.7963	22.4913	22.5673	22.9253
Q2G0B3	Q2G0B3	SAOUHSC_00692		ATP-binding;Completeproteome;Nucleotide-binding;Referenceproteome	61.909	4	15.7	427380000	69		0.288859	0.0967054	0.332066	21.9443	22.5989	22.2365	22.2425	22.1777	22.2005	22.0435	22.2137
Q2G0B4	Q2G0B4	uppP	Undecaprenyl-diphosphatase	Antibioticresistance;Cellmembrane;Cellshape;Cellwallbiogenesis/degradation;Completeproteome;Hydrolase;Membrane;Peptidoglycansynthesis;Referenceproteome;Transmembrane;Transmembranehelix	32.269	3	8.6	546950000	23		0.801234	-0.332653	0.0791481	22.6109	23.2561	23.275	23.2808	23.6247	23.5716	23.0778	23.4793
Q2G0B5	Q2G0B5	SAOUHSC_00690		Completeproteome;Referenceproteome	26.687	14	47.1	2189300000	139	+	1.14412	-0.365771	0.0334248	24.2534	23.9933	23.6083	23.9798	24.5599	24.4033	24.0819	24.2528
Q2G0B7	Q2G0B7	SAOUHSC_00688		Completeproteome;Referenceproteome	20.889	9	36.2	2319100000	143	+	3.62301	-1.02564	0.000520231	23.6744	23.7087	23.841	23.9954	24.8102	25.0532	24.5364	24.9223
Q2G0B8	Q2G0B8	SAOUHSC_00687		Completeproteome;Referenceproteome	21.465	10	66.7	724910000	46		0.523176	0.241259	0.163828	23.3148	23.7707	23.8714	23.1965	22.9601	23.3825	23.2522	23.5935
Q2G0B9	Q2G0B9	SAOUHSC_00686		Completeproteome;Referenceproteome	11.324	11	98	11657000000	250		0.546264	0.0374389	0.154721	26.1044	26.0698	26.0721	26.031	26.0931	26.0043	26.062	25.9683
Q2G0C6	Q2G0C6	SAOUHSC_00679		Completeproteome;DNA-binding;Referenceproteome;Transcription;Transcriptionregulation	33.244	19	66	4938200000	262		0.0648504	0.0123672	0.740614	24.2771	24.4301	24.5419	24.467	24.3337	24.3939	24.5192	24.4198
Q2G0C7	Q2G0C7	SAOUHSC_00678		Completeproteome;Referenceproteome	25.416	5	10.3	295150000	35		0.494931	-0.34141	0.17821	21.5787	22.0101	22.2637	21.7073	21.8257	22.0172	22.0396	23.0429
Q2G0C9	Q2G0C9	SAOUHSC_00676		Completeproteome;Referenceproteome	18.064	4	30.6	473080000	44		0.232737	-0.0826249	0.398522	22.64	22.9756	22.4861	22.7553	22.7235	22.6759	22.6942	23.0939
Q2G0D0	Q2G0D0	SAOUHSC_00675	Probable transcriptional regulatory protein SAOUHSC_00675	Completeproteome;Cytoplasm;DNA-binding;Referenceproteome;Transcription;Transcriptionregulation	26.32	25	76.5	33110000000	499	+	3.2863	0.481484	0.000559242	28.1106	28.1286	27.9559	27.9173	27.6435	27.6103	27.4525	27.4802
Q2G0D1	Q2G0D1	sarX	HTH-type transcriptional regulator SarX	Completeproteome;Cytoplasm;DNA-binding;Referenceproteome;Repressor;Transcription;Transcriptionregulation;Virulence	14.178	7	42.9	217170000	19	+	1.49836	-1.0616	0.015206	21.4425	21.7063	21.2999	21.4524	22.5121	23.5907	21.9333	22.1112
Q2G0D4	Q2G0D4	SAOUHSC_00671		Completeproteome;Referenceproteome	28.186	2	10.9	52306000	5		0.140014	0.142826	0.547417	19.863	21.5008	20.0466	20.3501	20.4038	20.4284	19.9391	20.4179
Q2G0D6	Q2G0D6	SAOUHSC_00669		Completeproteome;Referenceproteome	23.738	11	47.8	4482400000	210	+	1.81538	0.318767	0.00774908	24.8959	24.7279	24.7216	24.9817	24.7196	24.472	24.4122	24.4483
Q2G0D7	Q2G0D7	SAOUHSC_00668		Completeproteome;Referenceproteome	71.731	3	7.6	14674000000	3		0.55578	0.144308	0.150552	28.5212	28.6084	28.7415	29.059	28.6396	28.6316	28.5385	28.5432
Q2G0D8	Q2G0D8	SAOUHSC_00667		ATP-binding;Completeproteome;Nucleotide-binding;Referenceproteome	28.463	7	41.5	716790000	53	+	3.9608	0.729055	0.000429066	23.2985	23.4609	23.6139	23.5945	22.6618	22.8365	22.7706	22.7826
Q2G0D9	Q2G0D9	graS	Sensor histidine kinase GraS	Antibioticresistance;ATP-binding;Cellmembrane;Completeproteome;Kinase;Membrane;Nucleotide-binding;Phosphoprotein;Referenceproteome;Transferase;Transmembrane;Transmembranehelix;Two-componentregulatorysystem;Virulence	41.078	7	26	209340000	24	+	1.36072	-0.436284	0.0204444	21.4579	21.0004	21.6005	21.3471	21.9052	21.8059	21.4633	21.9767
Q2G0E0	Q2G0E0	graR	Response regulator protein GraR	Activator;Antibioticresistance;Completeproteome;Cytoplasm;DNA-binding;Phosphoprotein;Referenceproteome;Repressor;Transcription;Transcriptionregulation;Two-componentregulatorysystem;Virulence	26.079	5	29	250240000	12		0.2885	0.119264	0.332298	21.8433	21.5669	21.1803	21.7141	21.3383	21.6611	21.5714	21.2567
Q2G0E1	Q2G0E1	SAOUHSC_00664		Completeproteome;Referenceproteome	35.235	3	13.4	85796000	10		0.429506	0.220207	0.216691	21.0568	20.5857	21.3591	21.6427	20.9385	20.8815	20.9133	21.0301
Q2G0E2	Q2G0E2	SAOUHSC_00663		Completeproteome;Referenceproteome	19.279	4	32.7	166360000	22	+	1.7068	-0.773447	0.00961702	19.1069	19.8782	20.2775	19.854	20.4941	20.5739	20.5669	20.5755
Q2G0E5	Q2G0E5	SAOUHSC_00661		Completeproteome;Referenceproteome	39.838	6	26.5	393200000	47	+	1.94927	-0.646132	0.00585806	21.1	21.0114	21.7272	21.0048	21.8494	21.7728	21.9807	21.8251
Q2G0E7	Q2G0E7	SAOUHSC_00659		Completeproteome;Referenceproteome	19.009	4	23.6	562550000	44	+	2.84917	-0.540008	0.000911877	22.2167	22.2642	22.5408	22.5527	22.8347	22.9813	22.9129	23.0056
Q2G0E8	Q2G0E8	SAOUHSC_00658		Completeproteome;Referenceproteome	12.785	8	74.2	3115700000	114	+	6.01405	-1.78966	0	23.8142	24.0079	23.7919	24.0586	25.8309	25.7796	25.6301	25.5906
Q2G0E9	Q2G0E9	SAOUHSC_00656		Completeproteome;Referenceproteome	21.261	18	100	15365000000	212	+	4.14511	-1.43813	0.000502024	25.9537	25.9577	26.2945	26.5436	27.5942	27.5548	27.7487	27.6043
Q2G0F0	Q2G0F0	SAOUHSC_00619		Completeproteome;Referenceproteome	30.215	1	5.7	44288000	3		NaN	0	1	19.2384	20.7542	20.4138	19.0829	21.6492	19.6254	20.7883	20.6037
Q2G0F2	Q2G0F2	SAOUHSC_00617		Completeproteome;Referenceproteome	18.594	25	78	5125300000	334	+	3.51614	0.795985	0.00048913	24.1386	24.5691	24.3788	24.4748	23.5018	23.7476	23.5412	23.5868
Q2G0F3	Q2G0F3	SAOUHSC_00616		Completeproteome;Referenceproteome	30.925	19	56.4	3187600000	188	+	1.971	-0.451515	0.00572172	24.06	24.0014	23.7281	24.1308	24.3887	24.3433	24.6872	24.3072
Q2G0F4	Q2G0F4	SAOUHSC_00615		Completeproteome;Hydrolase;Referenceproteome	28.197	6	30.1	1119600000	55		0.676392	-0.31799	0.1089	22.7699	23.3617	23.7665	23.5935	23.6512	23.5244	23.7897	23.7982
Q2G0F6	Q2G0F6	SAOUHSC_00613		Completeproteome;Referenceproteome	31.088	22	74.5	2095000000	186	+	4.42926	-0.696557	0.000338308	22.6257	22.5558	22.6609	22.6484	23.4428	23.3992	23.2389	23.1961
Q2G0F8	Q2G0F8	argS	Arginine--tRNA ligase	Aminoacyl-tRNAsynthetase;ATP-binding;Completeproteome;Cytoplasm;Ligase;Nucleotide-binding;Proteinbiosynthesis;Referenceproteome	62.381	63	91	81145000000	1272	+	5.75873	0.748848	0	28.0001	28.0997	28.0336	28.1105	27.2185	27.3375	27.3518	27.3407
Q2G0F9	Q2G0F9	SAOUHSC_00610		Completeproteome;Referenceproteome	14.928	5	55.9	418170000	44	+	4.01262	1.85114	0.000442857	22.6138	22.8757	22.7125	23.1075	21.2547	20.9623	21.1911	20.4968
Q2G0G1	Q2G0G1	adh	Alcohol dehydrogenase	Completeproteome;Metal-binding;NAD;Oxidoreductase;Referenceproteome;Zinc	36.047	47	83.6	282760000000	1143	+	4.29648	-0.878748	0.000310502	30.5407	30.7422	30.6822	30.4734	31.6628	31.4484	31.4452	31.3972
Q2G0G2	Q2G0G2	SAOUHSC_00607		Completeproteome;Referenceproteome	19.579	3	14.5	663150000	37		0.883797	-0.31882	0.0655716	22.6263	22.913	22.6218	22.5268	22.6972	23.0367	22.8019	23.4273
Q2G0G3	Q2G0G3	SAOUHSC_00606		Completeproteome;Referenceproteome	50.595	15	42.2	979640000	153	+	1.52648	-0.748246	0.0145462	21.4972	21.6943	22.5307	22.4177	22.834	22.9145	22.6616	22.7229
Q2G0G4	Q2G0G4	SAOUHSC_00605		Completeproteome;Referenceproteome	18.415	4	22.8	2372700000	75		0.389924	-0.0600443	0.242138	24.4366	24.6013	24.3348	24.5592	24.6273	24.531	24.5264	24.4873
Q2G0G5	Q2G0G5	SAOUHSC_00604		Completeproteome;Referenceproteome	20.243	5	48.9	2944400000	94	+	2.37882	0.660977	0.00255657	24.6026	24.9847	24.4743	25.0317	24.0145	24.0353	24.2046	24.1951
Q2G0G6	Q2G0G6	SAOUHSC_00603		Completeproteome;Referenceproteome	35.459	17	67.9	3947200000	258	+	4.2663	-0.493506	0.000302222	24.1827	24.2068	24.0378	24.1583	24.5688	24.7144	24.6155	24.6607
Q2G0I1	Q2G0I1	SAOUHSC_00584		Completeproteome;Referenceproteome	51.669	18	42.9	910580000	107		0.53231	0.220683	0.160399	23.044	23.2521	22.713	23.0539	23.1215	22.983	22.4451	22.6307
Q2G0I3	Q2G0I3	SAOUHSC_00582		Completeproteome;Referenceproteome	15.798	2	24.6	169050000	38		0.726446	0.288691	0.095458	21.8521	22.2632	22.4587	21.8844	21.5529	22.151	21.7338	21.8659
Q2G0I4	Q2G0I4	SAOUHSC_00581		Completeproteome;FAD;Flavoprotein;Oxidoreductase;Redox-activecenter;Referenceproteome	48.415	13	40.2	1598800000	175	+	1.29407	-0.494023	0.0237637	23.0654	22.9227	23.618	22.6952	23.4848	23.5078	23.5717	23.713
Q2G0I5	Q2G0I5	SAOUHSC_00580	UPF0741 protein SAOUHSC_00580	Coiledcoil;Completeproteome;Referenceproteome	13.535	2	19.5	172840000	14	+	0.998981	0.334335	0.0488652	22.5833	22.1856	21.8084	22.085	21.841	21.9644	21.6626	21.8568
Q2G0I6	Q2G0I6	SAOUHSC_00579		ATP-binding;Completeproteome;Kinase;Nucleotide-binding;Referenceproteome;Transferase	40.216	11	38.5	1271100000	150		0.306523	0.046576	0.314375	23.1156	23.1009	23.3637	23.1527	23.1771	23.0877	23.1335	23.1483
Q2G0I7	Q2G0I7	SAOUHSC_00578		Completeproteome;Lyase;Referenceproteome	36.822	9	23.5	843800000	97		0.338665	-0.0654593	0.282649	23.4448	23.3033	23.0996	23.3314	23.4782	23.3069	23.3044	23.3515
Q2G0I8	Q2G0I8	SAOUHSC_00577		ATP-binding;Completeproteome;Kinase;Nucleotide-binding;Referenceproteome;Transferase	32.918	21	67.3	3757600000	265	+	2.09292	0.221952	0.00426813	23.6832	23.7018	23.7493	23.8954	23.6229	23.5068	23.5303	23.482
Q2G0I9	Q2G0I9	lipL	Octanoyl-[GcvH]:protein N-octanoyltransferase	Acyltransferase;Completeproteome;Referenceproteome;Transferase	31.735	2	11.5	278530000	33	+	1.04455	0.314154	0.0433908	22.4901	22.4273	22.378	22.5139	21.9277	22.5309	22.2266	21.8674
Q2G0J0	Q2G0J0	SAOUHSC_00574		Acyltransferase;Completeproteome;Referenceproteome;Transferase	34.951	32	82.3	74950000000	684	+	3.79906	0.338745	0.000393651	28.3166	28.4547	28.3418	28.3959	28.0726	28.0947	27.993	27.9937
Q2G0J1	Q2G0J1	SAOUHSC_00573	Putative heme-dependent peroxidase SAOUHSC_00573	Completeproteome;Heme;Iron;Metal-binding;Oxidoreductase;Peroxidase;Referenceproteome	29.39	25	58.8	63362000000	641	+	4.43868	1.05347	0	28.4715	28.6704	28.7105	28.5712	27.4022	27.5057	27.5192	27.7827
Q2G0J2	Q2G0J2	SAOUHSC_00572		Completeproteome;Referenceproteome	23.307	5	36.1	1039200000	22		0.211648	-0.153895	0.426195	24.333	23.9259	23.6371	23.0707	23.7085	24.2163	23.9155	23.7419
Q2G0J4	Q2G0J4	SAOUHSC_00569		Completeproteome;Membrane;Referenceproteome;Transmembrane	54.337	7	10.9	502970000	60	+	1.91135	-1.04477	0.00629367	21.3807	22.1132	21.3688	20.8084	22.5072	22.4977	22.7242	22.1211
Q2G0J5	Q2G0J5	SAOUHSC_00567	UPF0382 membrane protein SAOUHSC_00567	Cellmembrane;Completeproteome;Membrane;Referenceproteome;Transmembrane;Transmembranehelix	13.065	1	9	429160000	33	+	2.02723	-0.527849	0.00484154	22.6161	22.6696	23.1282	22.9171	23.1694	23.3427	23.3955	23.5348
Q2G0J7	Q2G0J7	ung	Uracil-DNA glycosylase	Completeproteome;Cytoplasm;DNAdamage;DNArepair;Glycosidase;Hydrolase;Referenceproteome	24.937	11	49.5	996260000	95	+	1.93115	-0.549119	0.0062069	22.0727	22.2283	21.9913	22.2171	22.3579	22.7311	22.5802	23.0366
Q2G0J8	Q2G0J8	SAOUHSC_00562		ATP-binding;Completeproteome;Kinase;Nucleotide-binding;Referenceproteome;Transferase	29.857	23	64.5	16940000000	387	+	3.22386	-0.436329	0.000548837	27.0667	27.3108	27.1449	27.1886	27.613	27.7236	27.6037	27.5159
Q2G0K4	Q2G0K4	SAOUHSC_00556		Completeproteome;Referenceproteome	51.657	2	3.2	121640000	14	+	4.36721	-1.66598	0.000326923	19.9705	19.9016	19.5878	19.4886	21.6844	21.3842	21.373	21.1708
Q2G0K5	Q2G0K5	SAOUHSC_00555		Completeproteome;Hydrolase;Referenceproteome	23.867	10	76.7	3357000000	181	+	2.33966	0.222275	0.00258045	25.2195	25.3132	25.1628	25.2934	25.0677	24.9148	25.0617	25.0556
Q2G0K6	Q2G0K6	SAOUHSC_00554		Completeproteome;Referenceproteome	17.762	12	71.3	3283500000	147	+	2.079	0.493792	0.00430476	24.6966	24.985	24.9977	24.9162	24.2662	24.1893	24.6492	24.5157
Q2G0K7	Q2G0K7	SAOUHSC_00553	3-hexulose-6-phosphate synthase	Carbohydratemetabolism;Completeproteome;Lyase;One-carbonmetabolism;Referenceproteome	22.435	25	95.7	26786000000	472	+	2.15741	0.518925	0.00379272	28.4746	28.3239	28.1557	27.9516	27.8747	27.7243	27.5758	27.6553
Q2G0K8	Q2G0K8	nagB	Glucosamine-6-phosphate deaminase	Carbohydratemetabolism;Completeproteome;Hydrolase;Referenceproteome	28.467	12	57.5	2885100000	211		0.0935152	0.0182066	0.655563	24.6432	24.5394	24.7614	24.5356	24.6943	24.619	24.471	24.6225
Q2G0K9	Q2G0K9	SAOUHSC_00551		Completeproteome;Referenceproteome	13.693	3	24.2	1224900000	62	+	4.00093	1.19718	0.000439716	24.8297	24.8076	24.6875	25.1023	23.366	23.7796	23.763	23.7298
Q2G0L0	Q2G0L0	SAOUHSC_00550		Completeproteome;Referenceproteome	24.921	19	88.7	11198000000	413	+	5.84456	1.08879	0	26.7566	26.7934	26.7455	26.6214	25.6966	25.58	25.733	25.5521
Q2G0L1	Q2G0L1	folE2	GTP cyclohydrolase FolE2	Completeproteome;Hydrolase;Referenceproteome	33.481	23	78.4	8924100000	387	+	4.85373	0.904929	0	26.4681	26.6249	26.5673	26.7388	25.5702	25.7117	25.754	25.7436
Q2G0L2	Q2G0L2	SAOUHSC_00548		Completeproteome;Referenceproteome	58.418	27	48.6	6094900000	334	+	1.24121	0.197605	0.0268651	24.7249	25.0333	25.0175	25.0928	24.7593	24.8179	24.7329	24.768
Q2G0L3	Q2G0L3	SAOUHSC_00547		Completeproteome;Referenceproteome	57.192	17	38.8	752550000	68	+	1.26569	-0.49985	0.0250602	21.6862	21.5999	21.4892	22.3439	22.1679	22.2731	22.516	22.1615
Q2G0L4	Q2G0L4	sdrD	Serine-aspartate repeat-containing protein D	Calcium;Cellwall;Completeproteome;Peptidoglycan-anchor;Referenceproteome;Repeat;Secreted;Signal	146.09	4	5.3	303370000	8		0.294518	0.191154	0.326358	22.5966	22.6301	22.4633	22.7999	22.0403	22.748	21.9346	23.0024
Q2G0L5	Q2G0L5	sdrC	Serine-aspartate repeat-containing protein C	Calcium;Cellwall;Completeproteome;Peptidoglycan-anchor;Referenceproteome;Repeat;Secreted;Signal	107.79	14	20.5	1505600000	86	+	4.59857	-2.01649	0	23.4086	23.926	23.8915	23.5581	26.0102	25.7386	25.4267	25.6747
Q2G0L7	Q2G0L7	azo1	FMN-dependent NADPH-azoreductase	Completeproteome;Flavoprotein;FMN;NADP;Oxidoreductase;Referenceproteome	20.911	15	79.3	22987000000	376		0.306948	-0.0471644	0.313883	27.2072	27.4423	27.333	27.2367	27.4622	27.307	27.3179	27.3207
Q2G0L8	Q2G0L8	SAOUHSC_00542		Completeproteome;Referenceproteome	31.841	28	80.6	11532000000	461		0.39236	-0.0397568	0.24059	25.1501	25.3055	25.1754	25.3092	25.2876	25.3027	25.2727	25.2363
Q2G0L9	Q2G0L9	tadA	tRNA-specific adenosine deaminase	Completeproteome;Hydrolase;Metal-binding;Referenceproteome;tRNAprocessing;Zinc	17.09	4	38.5	496510000	26	+	2.17958	0.610932	0.00380872	22.3312	22.7327	22.7737	22.8301	22.2645	22.1173	21.7939	22.0482
Q2G0M0	Q2G0M0	SAOUHSC_00540		Completeproteome;Referenceproteome	24.153	9	48.8	1717700000	95	+	2.2592	-0.556627	0.00285962	23.5068	23.3124	23.6695	23.271	23.7511	23.9486	24.1294	24.157
Q2G0M1	Q2G0M1	SAOUHSC_00539		Completeproteome;Referenceproteome	26.227	15	63.6	6108100000	243	+	3.07021	-0.889886	0.000625268	23.8009	23.9165	24.0571	24.0805	24.5248	24.7699	25.0724	25.0475
Q2G0M2	Q2G0M2	SAOUHSC_00538		Completeproteome;Hydrolase;Referenceproteome	24.992	11	66.1	2227600000	139	+	2.83096	-0.937189	0.000903226	22.4168	22.7414	23.0524	23.0619	23.6998	23.7726	23.947	23.6018
Q2G0M4	Q2G0M4	SAOUHSC_00536	Branched-chain-amino-acid aminotransferase	Amino-acidbiosynthesis;Aminotransferase;Branched-chainaminoacidbiosynthesis;Completeproteome;Pyridoxalphosphate;Referenceproteome;Transferase	40.086	36	83.5	27335000000	572	+	6.5812	-1.1155	0	25.3412	25.3054	25.4676	25.3782	26.5003	26.4109	26.5019	26.5411
Q2G0M5	Q2G0M5	SAOUHSC_00535	Uncharacterized epimerase/dehydratase SAOUHSC_00535	Completeproteome;Referenceproteome	36.052	25	90.7	25566000000	498	+	6.71641	-1.31648	0	27.4399	27.4312	27.3829	27.565	28.754	28.8574	28.7641	28.7094
Q2G0M6	Q2G0M6	araB	Ribulokinase	Arabinosecatabolism;ATP-binding;Carbohydratemetabolism;Completeproteome;Kinase;Nucleotide-binding;Referenceproteome;Transferase	61.01	17	42	2090000000	138	+	6.09939	-4.88127	0	19.6405	19.731	19.0408	20.0469	24.2244	24.7191	24.562	24.4787
Q2G0M7	Q2G0M7	hchA	Molecular chaperone Hsp31 and glyoxalase 3	Chaperone;Completeproteome;Cytoplasm;Lyase;Referenceproteome	32.176	26	43.8	46570000000	544	+	3.47627	-1.20185	0.000472441	27.2572	27.1972	27.1922	26.5651	28.2628	28.2103	28.2443	28.3017
Q2G0M8	Q2G0M8	SAOUHSC_00532		Completeproteome;Pyridoxalphosphate;Referenceproteome	42.89	50	75.9	56681000000	1188	+	4.23219	-0.573245	0.000293103	26.9814	27.0089	26.9189	27.1774	27.5661	27.5712	27.6317	27.6106
Q2G0M9	Q2G0M9	SAOUHSC_00531		Completeproteome;Referenceproteome	43.657	19	62.1	1425000000	91	+	2.04148	-1.32922	0.00474731	20.7122	21.6839	21.3107	22.2489	23.1398	22.8692	22.4721	22.7916
Q2G0N0	Q2G0N0	tuf	Elongation factor Tu	Completeproteome;Cytoplasm;Elongationfactor;GTP-binding;Nucleotide-binding;Proteinbiosynthesis;Referenceproteome	43.103	62	99.7	1378300000000	3037	+	2.50046	-0.295702	0.00190879	32.5854	32.4078	32.3443	32.3315	32.7732	32.7076	32.6732	32.6978
Q2G0N1	Q2G0N1	fusA	Elongation factor G	Completeproteome;Cytoplasm;Elongationfactor;GTP-binding;Nucleotide-binding;Proteinbiosynthesis;Referenceproteome	76.612	105	97.1	1278400000000	3968		0.83702	0.0781574	0.0733855	32.0298	31.8691	31.9449	31.8533	31.8267	31.7988	31.8501	31.9088
Q2G0N5	Q2G0N5	rpoC	DNA-directed RNA polymerase subunit beta'	Completeproteome;DNA-directedRNApolymerase;Nucleotidyltransferase;Referenceproteome;Transcription;Transferase	135.41	164	91.2	353110000000	3949		0.11291	-0.0126429	0.606376	28.6232	28.6523	28.6903	28.638	28.5715	28.6268	28.7341	28.722
Q2G0N7	Q2G0N7	SAOUHSC_00523		Completeproteome;Referenceproteome	22.68	15	71.3	3623200000	222	+	4.36728	0.981501	0.000328502	25.096	25.1909	25.01	25.0181	24.0634	24.3399	23.9704	24.0154
Q2G0N9	Q2G0N9	rplJ	50S ribosomal protein L10	Completeproteome;Referenceproteome;Ribonucleoprotein;Ribosomalprotein;RNA-binding;rRNA-binding	17.71	32	99.4	142860000000	933	+	3.03191	-0.273554	0.000609603	29.3131	29.3434	29.2732	29.2052	29.5258	29.5016	29.6556	29.5461
Q2G0P0	Q2G0P0	rplA	50S ribosomal protein L1	Completeproteome;Referenceproteome;Repressor;Ribonucleoprotein;Ribosomalprotein;RNA-binding;rRNA-binding;Translationregulation;tRNA-binding	24.708	54	97.4	316280000000	1549	+	2.32915	-0.252756	0.00256119	30.125	30.1466	30.1706	30.217	30.2927	30.3624	30.5243	30.4907
Q2G0P2	Q2G0P2	nusG	Transcription termination/antitermination protein NusG	Completeproteome;Referenceproteome;Transcription;Transcriptionantitermination;Transcriptionregulation;Transcriptiontermination	20.663	23	85.2	22907000000	529		0.806927	-0.0662918	0.0780792	27.0424	27.0424	26.9937	27.0145	26.9748	27.15	27.1225	27.1109
Q2G0P5	Q2G0P5	clpC	ATP-dependent Clp protease ATP-binding subunit ClpC	ATP-binding;Chaperone;Completeproteome;Nucleotide-binding;Referenceproteome;Stressresponse;Virulence	91.036	93	80	62872000000	1585	+	3.50352	-0.1832	0.000482574	27.3513	27.4531	27.3904	27.4442	27.6096	27.5806	27.585	27.5966
Q2G0P6	Q2G0P6	mcsB	Protein-arginine kinase	ATP-binding;Completeproteome;Kinase;Nucleotide-binding;Referenceproteome;Transferase	38.61	15	48.7	1894700000	199		0.439367	-0.0893149	0.210284	23.3109	23.2594	23.3955	23.4912	23.358	23.4841	23.3188	23.6534
Q2G0P7	Q2G0P7	SAOUHSC_00503		Completeproteome;Referenceproteome	21.702	6	34	295530000	26		0.7299	-0.926237	0.094574	22.699	22.3708	22.433	20.0784	23.1673	22.7333	22.7107	22.6747
Q2G0P8	Q2G0P8	ctsR	Transcriptional regulator CtsR	Completeproteome;DNA-binding;Referenceproteome;Repressor;Stressresponse;Transcription;Transcriptionregulation	17.841	10	47.7	1494500000	131	+	1.93204	-0.366892	0.00621483	23.433	23.0846	23.547	23.3835	23.7217	23.7545	23.6536	23.7859
Q2G0P9	Q2G0P9	SAOUHSC_00501		Completeproteome;Referenceproteome	43.804	7	11.9	1525100000	46		0.0417034	-0.0219703	0.82273	24.3063	24.8267	24.9897	24.975	24.9709	24.8569	24.8061	24.5516
Q2G0Q0	Q2G0Q0	pdxT	Pyridoxal 5'-phosphate synthase subunit PdxT	Completeproteome;Glutamineamidotransferase;Hydrolase;Lyase;Pyridoxalphosphate;Referenceproteome	20.63	15	66.1	3566300000	124	+	3.97239	-0.518119	0.000433566	24.3063	24.3358	24.5221	24.403	24.8202	24.9094	24.9671	24.9429
Q2G0Q1	Q2G0Q1	pdxS	Pyridoxal 5'-phosphate synthase subunit PdxS	Completeproteome;Lyase;Pyridoxalphosphate;Referenceproteome;Schiffbase	31.992	46	82	105700000000	978	+	3.19971	-0.331867	0.000666667	28.0311	28.1295	28.2369	28.0565	28.3906	28.4299	28.4756	28.4854
Q2G0Q2	Q2G0Q2	SAOUHSC_00497		Completeproteome;DNA-binding;Referenceproteome;Transcription;Transcriptionregulation	53.954	8	23.9	276810000	41		0.874967	0.497422	0.0670251	21.3947	22.5415	21.9242	22.5133	21.6587	21.3749	21.7906	21.5598
Q2G0Q3	Q2G0Q3	lysS	Lysine--tRNA ligase	Aminoacyl-tRNAsynthetase;ATP-binding;Completeproteome;Cytoplasm;Ligase;Magnesium;Metal-binding;Nucleotide-binding;Proteinbiosynthesis;Referenceproteome	56.719	58	82.2	59414000000	1022	+	4.86636	-0.77768	0	26.4246	26.4828	26.4902	26.5733	27.1817	27.1788	27.3689	27.3522
Q2G0Q5	Q2G0Q5	SAOUHSC_00491		Completeproteome;Kinase;Referenceproteome;Transferase	18.029	6	50.6	2153100000	85	+	2.57435	-0.508507	0.00167273	24.1576	24.1574	23.9197	23.85	24.5854	24.5468	24.6442	24.3424
Q2G0Q6	Q2G0Q6	SAOUHSC_00490		Completeproteome;Lyase;Referenceproteome	13.734	9	56.2	1695300000	97	+	2.96943	-0.681607	0.000704453	22.6483	23.0523	22.8748	22.6619	23.5925	23.4025	23.611	23.3577
Q2G0Q7	Q2G0Q7	SAOUHSC_00489	Dihydropteroate synthase	Completeproteome;Folatebiosynthesis;Magnesium;Metal-binding;Referenceproteome;Transferase	29.522	19	73.4	5984800000	376		0.454458	-0.0829015	0.200907	24.3418	24.3637	24.4761	24.5882	24.4865	24.4117	24.5123	24.691
Q2G0Q8	Q2G0Q8	SAOUHSC_00488	Cysteine synthase	Amino-acidbiosynthesis;Completeproteome;Cysteinebiosynthesis;Pyridoxalphosphate;Referenceproteome;Transferase	32.975	38	99	82041000000	1160	+	4.64951	-0.565875	0	28.2423	28.3821	28.4136	28.4386	28.8951	28.9555	28.979	28.9104
Q2G0Q9	Q2G0Q9	hslO	33 kDa chaperonin	Chaperone;Completeproteome;Cytoplasm;Disulfidebond;Redox-activecenter;Referenceproteome;Zinc	31.822	25	66.6	10774000000	433	+	4.64258	-0.645574	0	24.4702	24.5372	24.5423	24.6969	25.2222	25.1396	25.1997	25.2675
Q2G0R0	Q2G0R0	ftsH	ATP-dependent zinc metalloprotease FtsH	ATP-binding;Cellmembrane;Completeproteome;Hydrolase;Membrane;Metal-binding;Metalloprotease;Nucleotide-binding;Protease;Referenceproteome;Transmembrane;Transmembranehelix;Zinc	77.812	54	61.1	60033000000	1328	+	4.33593	0.271435	0.000316279	26.5523	26.5629	26.6224	26.5467	26.2665	26.2864	26.2899	26.3557
Q2G0R1	Q2G0R1	SAOUHSC_00485		Completeproteome;Glycosyltransferase;Referenceproteome;Transferase	20.154	18	60.3	16531000000	296	+	5.60115	0.5219	0	27.6271	27.5852	27.5704	27.6419	27.0531	27.0359	27.0996	27.1484
Q2G0R2	Q2G0R2	tilS	tRNA(Ile)-lysidine synthase	ATP-binding;Completeproteome;Cytoplasm;Ligase;Nucleotide-binding;Referenceproteome;tRNAprocessing	51.291	10	29.7	976570000	62	+	2.96953	0.981562	0.000705882	23.5209	23.4454	23.9613	23.574	22.5013	22.3897	22.7644	22.92
Q2G0R3	Q2G0R3	SAOUHSC_00483		Completeproteome;Referenceproteome	14.812	12	78.9	15289000000	212	+	1.52958	0.26528	0.0145142	27.055	26.8631	27.0158	26.9646	26.8838	26.7582	26.7121	26.4832
Q2G0R4	Q2G0R4	SAOUHSC_00482		Completeproteome;Referenceproteome	15.348	3	36.2	268680000	64	+	1.01885	-0.34311	0.0463045	21.4289	20.9206	21.4303	21.5392	21.49	21.9376	21.5217	21.7421
Q2G0R5	Q2G0R5	SAOUHSC_00481		Completeproteome;Referenceproteome	9.8563	10	81.6	2944600000	133	+	1.79518	-0.363465	0.00800976	23.5258	23.6791	23.9228	23.9473	24.1636	24.133	24.2153	24.0167
Q2G0R6	Q2G0R6	SAOUHSC_00480		Completeproteome;Referenceproteome	45.109	14	38.5	3117500000	139	+	1.06739	0.176844	0.0413531	24.8657	24.849	25.0723	24.7677	24.7497	24.7067	24.5605	24.8304
Q2G0R8	Q2G0R8	mfd	Transcription-repair-coupling factor	ATP-binding;Completeproteome;Cytoplasm;DNA-binding;DNAdamage;DNArepair;Helicase;Hydrolase;Nucleotide-binding;Referenceproteome	134.22	37	35.4	4042400000	319		0.929664	-0.115888	0.058557	24.473	24.3471	24.4262	24.573	24.6061	24.4532	24.6515	24.572
Q2G0R9	Q2G0R9	pth	Peptidyl-tRNA hydrolase	Completeproteome;Cytoplasm;Hydrolase;Referenceproteome	21.703	13	56.3	3961800000	224		0.0540488	0.0123081	0.77649	24.3056	24.2249	24.2968	24.4301	24.1182	24.4361	24.3608	24.293
Q2G0S0	Q2G0S0	rplY	50S ribosomal protein L25	Completeproteome;Referenceproteome;Ribonucleoprotein;Ribosomalprotein;RNA-binding;rRNA-binding	23.787	28	53	99370000000	604	+	3.46103	-0.401953	0.000469974	28.2752	28.4592	28.5187	28.4027	28.7714	28.8393	28.8546	28.7982
Q2G0S2	Q2G0S2	prs	Ribose-phosphate pyrophosphokinase	ATP-binding;Completeproteome;Cytoplasm;Kinase;Magnesium;Metal-binding;Nucleotide-binding;Nucleotidebiosynthesis;Referenceproteome;Transferase	35.283	32	83.2	44472000000	553	+	3.24397	0.617128	0.000552693	28.597	28.7788	28.941	28.9514	28.1923	28.0898	28.2295	28.288
Q2G0S3	Q2G0S3	glmU	Bifunctional protein GlmU;Glucosamine-1-phosphate N-acetyltransferase;UDP-N-acetylglucosamine pyrophosphorylase	Acyltransferase;Cellshape;Cellwallbiogenesis/degradation;Completeproteome;Cytoplasm;Magnesium;Metal-binding;Multifunctionalenzyme;Nucleotidyltransferase;Peptidoglycansynthesis;Referenceproteome;Repeat;Transferase	48.502	16	52.4	24169000000	333	+	3.61477	0.505501	0.000517241	28.7609	28.7237	28.7009	28.679	28.2839	28.3496	28.1142	28.0949
Q2G0S5	Q2G0S5	spoVG	Putative septation protein SpoVG	Cellcycle;Celldivision;Completeproteome;Referenceproteome;Septation	11.278	15	99	12223000000	338	+	1.83932	-0.26643	0.00730112	25.8888	25.8889	25.9296	25.9853	26.3345	26.2875	26.1283	26.0079
Q2G0S6	Q2G0S6	SAOUHSC_00468		Completeproteome;Referenceproteome	13.996	5	40.5	1459900000	78		0.0613256	0.0210948	0.751844	24.3649	24.7533	24.7303	24.4812	24.7771	24.4722	24.4379	24.5582
Q2G0S7	Q2G0S7	SAOUHSC_00467		Completeproteome;Referenceproteome	30.395	34	88	19318000000	528	+	1.01298	-0.148299	0.0471083	26.2448	26.3577	26.3788	26.5392	26.5346	26.4023	26.5647	26.612
Q2G0S8	Q2G0S8	ispE	4-diphosphocytidyl-2-C-methyl-D-erythritol kinase	ATP-binding;Completeproteome;Isoprenebiosynthesis;Kinase;Nucleotide-binding;Referenceproteome;Transferase	31.442	9	40.1	386580000	64		0.0793378	0.0274367	0.695346	21.7757	21.5456	21.7969	22.0084	21.8964	21.5783	21.8877	21.6545
Q2G0S9	Q2G0S9	SAOUHSC_00465		Completeproteome;Referenceproteome	9.9982	5	80.5	2983700000	90	+	2.41363	0.792469	0.0023913	25.8267	26.3719	25.9527	25.7711	25.0722	25.2058	25.4849	24.9896
Q2G0T0	Q2G0T0	rsmA	Ribosomal RNA small subunit methyltransferase A	Completeproteome;Cytoplasm;Methyltransferase;Referenceproteome;RNA-binding;rRNAprocessing;S-adenosyl-L-methionine;Transferase	33.737	21	62	6457000000	295	+	4.28645	0.50424	0.000307692	25.3179	25.1967	25.2837	25.2896	24.7136	24.7532	24.7137	24.8904
Q2G0T1	Q2G0T1	rnmV	Ribonuclease M5	Completeproteome;Cytoplasm;Endonuclease;Hydrolase;Magnesium;Metal-binding;Nuclease;Referenceproteome;Ribosomebiogenesis;RNA-binding;rRNA-binding;rRNAprocessing	20.092	7	35.4	1452600000	96	+	2.67166	0.728179	0.00140035	23.7281	23.5479	23.7232	23.3692	23.0293	23.0876	22.66	22.6787
Q2G0T3	Q2G0T3	recR	Recombination protein RecR	Completeproteome;DNAdamage;DNArecombination;DNArepair;Metal-binding;Referenceproteome;Zinc;Zinc-finger	22.099	12	74.7	3295900000	148		0.366328	0.063096	0.259524	24.6889	24.7658	24.7065	24.6469	24.6611	24.4335	24.733	24.7281
Q2G0T4	Q2G0T4	SAOUHSC_00444	Nucleoid-associated protein SAOUHSC_00444	Completeproteome;Cytoplasm;DNA-binding;Referenceproteome	11.597	7	56.2	24278000000	211		0.362834	0.0671186	0.262074	28.1305	28.2437	28.3845	28.107	28.2939	28.092	28.09	28.1212
Q2G0T5	Q2G0T5	SAOUHSC_00442		Completeproteome;Nucleotidyltransferase;Referenceproteome;Transferase	62.458	32	54.9	6994700000	384	+	4.53511	0.726746	0	25.0574	25.1113	25.0915	25.22	24.2469	24.4328	24.3903	24.5032
Q2G0T6	Q2G0T6	SAOUHSC_00441		Completeproteome;Referenceproteome	19.908	3	18.4	628120000	64		0.342716	-0.0839133	0.279004	23.0624	22.9832	22.8306	23.2133	23.0411	23.194	22.9476	23.2425
Q2G0T8	Q2G0T8	SAOUHSC_00439		Completeproteome;DNA-binding;Referenceproteome;Transcription;Transcriptionregulation	27.962	12	48.8	1713900000	155	+	2.71897	0.697541	0.00135	23.3637	23.5537	23.6816	23.8819	22.7075	22.9964	23.0533	22.9337
Q2G0T9	Q2G0T9	SAOUHSC_00438		Completeproteome;Referenceproteome	63.513	31	63.9	19873000000	582	+	3.30897	0.336408	0.000568675	26.0307	26.0898	26.1834	26.2432	25.819	25.7899	25.8265	25.7661
Q2G0U0	Q2G0U0	SAOUHSC_00437		Cellmembrane;Completeproteome;Kinase;Membrane;Phosphotransferasesystem;Referenceproteome;Sugartransport;Transferase;Transmembrane;Transmembranehelix;Transport	50.937	11	24.6	1105600000	95		0.29327	-0.0952229	0.32722	23.3843	23.1879	23.208	23.2996	23.6727	23.4737	23.1987	23.1157
Q2G0U6	Q2G0U6	SAOUHSC_00430		Completeproteome;Referenceproteome	18.48	7	65.8	497470000	52	+	2.25232	0.748205	0.00292795	21.9751	22.2065	22.3553	22.1293	21.0391	21.3267	21.5126	21.7949
Q2G0U7	Q2G0U7	SAOUHSC_00429		Completeproteome;Hydrolase;Referenceproteome	15.053	8	66.4	463120000	32	+	1.63912	0.407404	0.0110171	22.2591	21.944	21.7776	22.1039	21.4408	21.7004	21.5046	21.8092
Q2G0U8	Q2G0U8	SAOUHSC_00428		Completeproteome;Referenceproteome	9.9987	4	41.6	441760000	23	+	2.48119	1.51242	0.00204173	22.9498	24.1216	23.0225	23.3582	22.0566	22.1288	21.8729	21.3442
Q2G0U9	Q2G0U9	sle1	N-acetylmuramoyl-L-alanine amidase sle1	Antimicrobial;Bacteriolyticenzyme;Cellcycle;Celldivision;Cellwallbiogenesis/degradation;Completeproteome;Directproteinsequencing;Hydrolase;Referenceproteome;Repeat;Secreted;Septation;Signal;Virulence	35.835	16	61.4	10901000000	325	+	4.03984	1.38059	0.000457565	25.4891	25.9789	25.9457	26.0927	24.6544	24.4025	24.3627	24.5646
Q2G0V0	Q2G0V0	SAOUHSC_00426	Lipoprotein	Completeproteome;Lipoprotein;Referenceproteome	30.456	11	45.4	905730000	73	+	2.92936	0.866636	0.000690476	23.4009	23.4056	23.3102	23.7742	22.8723	22.564	22.6448	22.3433
Q2G0V3	Q2G0V3	SAOUHSC_00422		Completeproteome;Pyridoxalphosphate;Referenceproteome	41.278	7	28.9	1502600000	93	+	5.27864	-1.3866	0	22.7676	22.9976	22.9314	23.0809	24.2453	24.4806	24.2092	24.389
Q2G0V7	Q2G0V7	SAOUHSC_00417		Completeproteome;Referenceproteome	27.443	8	35.7	2468800000	133		0.00194756	-0.00108004	0.989413	24.5142	24.8154	25.3707	24.8819	24.8515	24.9152	25.0305	24.7893
Q2G0W0	Q2G0W0	SAOUHSC_00414		Completeproteome;Referenceproteome	13.581	10	63.3	3182000000	182	+	3.34491	0.70673	0.000588529	24.3474	24.4723	24.5135	24.5957	23.6249	23.7152	24.0303	23.7316
Q2G0W1	Q2G0W1	SAOUHSC_00413	UPF0753 protein SAOUHSC_00413	Completeproteome;Referenceproteome	102.62	27	31.4	1918400000	221		0.307474	-0.152404	0.313382	23.084	22.8433	22.3994	22.4956	22.917	23.1888	22.5336	22.7926
Q2G0W4	Q2G0W4	SAOUHSC_00410		Completeproteome;Referenceproteome	45.047	9	31	855080000	64	+	2.59434	-1.40055	0.00148915	20.9057	22.0625	21.3072	21.3924	22.5908	22.8716	22.591	23.2166
Q2G0W6	Q2G0W6	SAOUHSC_00408		Completeproteome;Referenceproteome	11.788	7	70.2	230770000	20	+	3.7472	-1.20809	0.000385093	22.2108	21.5582	21.7022	21.8075	23.0788	22.8915	23.0458	23.0951
Q2G0W7	Q2G0W7	SAOUHSC_00407		Completeproteome;Referenceproteome	13.458	5	54.2	673410000	76	+	1.69404	-0.381997	0.00989894	22.4613	22.7133	22.5126	22.614	22.7786	22.7835	23.0424	23.2246
Q2G0W8	Q2G0W8	SAOUHSC_00406		Completeproteome;Referenceproteome	49.261	37	70.4	6232900000	353	+	2.84796	-0.344481	0.000910134	24.6901	24.8279	24.7332	24.8783	25.2103	25.1967	25.0575	25.043
Q2G0W9	Q2G0W9	SAOUHSC_00405	Uncharacterized lipoprotein SAOUHSC_00405	Cellmembrane;Completeproteome;Lipoprotein;Membrane;Palmitate;Referenceproteome;Signal	31.467	24	67.8	7076000000	428	+	2.36479	-0.327021	0.0026079	25.0805	25.2275	25.0522	25.3278	25.444	25.5977	25.4988	25.4555
Q2G0X5	Q2G0X5	SAOUHSC_00398		Completeproteome;Referenceproteome	47.135	25	61.5	2624800000	251	+	6.66922	1.28917	0	24.0624	23.9046	23.9264	24.0457	22.6793	22.7736	22.694	22.6355
Q2G0X6	Q2G0X6	SAOUHSC_00397		Completeproteome;Methyltransferase;Referenceproteome;Transferase	56.138	2	56.9	370930000	26	+	4.18454	1.73048	0.000512397	24.1374	24.1704	23.7913	24.0252	21.8663	22.4833	22.5549	22.298
Q2G0Y0	Q2G0Y0	SAOUHSC_00382		Completeproteome;Referenceproteome	31.827	10	52.3	1129900000	89		0.95875	0.317768	0.0540214	23.6826	23.8779	24.0219	24.4407	23.5792	23.618	23.8078	23.747
Q2G0Y5	Q2G0Y5	SAOUHSC_00376		Completeproteome;Referenceproteome	20.896	1	9	58591000	7		0.727801	-0.944222	0.0950229	20.1342	18.1969	20.1219	20.408	21.7302	20.5157	19.9671	20.4249
Q2G0Y6	Q2G0Y6	guaA	GMP synthase [glutamine-hydrolyzing]	ATP-binding;Completeproteome;Glutamineamidotransferase;GMPbiosynthesis;Ligase;Nucleotide-binding;Purinebiosynthesis;Referenceproteome	58.23	56	80.1	81387000000	1079	+	1.47414	0.226497	0.016	27.6899	27.7275	27.8216	27.88	27.417	27.4552	27.7125	27.6283
Q2G0Y7	Q2G0Y7	guaB	Inosine-5'-monophosphate dehydrogenase	CBSdomain;Completeproteome;GMPbiosynthesis;Metal-binding;NAD;Oxidoreductase;Potassium;Purinebiosynthesis;Referenceproteome;Repeat	52.85	66	92.4	135170000000	1516	+	3.67329	0.27159	0.000369048	28.8976	28.8727	28.8271	28.9489	28.6223	28.6183	28.554	28.6652
Q2G0Y9	Q2G0Y9	xpt	Xanthine phosphoribosyltransferase	Completeproteome;Cytoplasm;Glycosyltransferase;Purinesalvage;Referenceproteome;Transferase	20.884	18	67.7	11465000000	326	+	4.43285	-0.571825	0.00034	25.8742	26.0175	25.9133	26.0179	26.4342	26.4973	26.5966	26.5822
Q2G0Z0	Q2G0Z0	SAOUHSC_00371		Completeproteome;Referenceproteome	15.122	21	98.5	25301000000	471		0.566709	0.228434	0.14565	27.9241	27.3948	27.7351	27.1158	27.4322	27.3427	27.3254	27.1557
Q2G0Z1	Q2G0Z1	SAOUHSC_00370		Completeproteome;Referenceproteome	25.804	11	55	1286200000	118		0.886657	0.391407	0.0651573	23.0065	23.7945	23.8397	23.6146	22.9927	23.4991	23.1473	23.0506
Q2G0Z2	Q2G0Z2	SAOUHSC_00369		Completeproteome;Referenceproteome	35.612	23	74.8	8502600000	369	+	1.6928	0.201159	0.0100141	25.3523	25.2452	25.1262	25.3801	25.1589	25.0441	25.0454	25.0507
Q2G0Z4	Q2G0Z4	SAOUHSC_00367		Completeproteome;Membrane;Referenceproteome;Transmembrane;Transmembranehelix	49.412	6	15.6	432180000	46	+	2.18237	-0.600335	0.00381408	21.8734	22.3514	22.1383	22.3957	22.9532	22.8742	22.7789	22.5537
Q2G0Z5	Q2G0Z5	nfrA	NADPH-dependent oxidoreductase	Completeproteome;Flavoprotein;FMN;NADP;Oxidoreductase;Referenceproteome	28.597	13	53.4	3151500000	160	+	4.15049	0.459208	0.000504065	23.7142	23.7367	23.8555	23.7664	23.2412	23.4096	23.2794	23.3056
Q2G0Z9	Q2G0Z9	SAOUHSC_00362		Completeproteome;Referenceproteome	23.664	20	76.9	2603600000	154		0.96513	-0.107604	0.0534084	24.1717	23.9771	24.1043	24.1	24.303	24.1836	24.1889	24.1081
Q2G101	Q2G101	SAOUHSC_00359		Completeproteome;Referenceproteome	22.733	6	29.5	1233000000	69	+	4.60366	-0.98811	0	22.8351	22.9029	22.6171	22.6709	23.8316	23.7778	23.7769	23.5922
Q2G104	Q2G104	SAOUHSC_00357		Completeproteome;Referenceproteome	10.789	7	69	3109800000	130	+	2.44314	-0.985959	0.00201266	24.7509	24.6056	24.8968	23.9517	25.5016	25.5234	25.6656	25.4583
Q2G105	Q2G105	SAOUHSC_00356		Completeproteome;Referenceproteome	21.306	13	46.8	5187000000	136	+	3.57905	-1.11854	0.000505618	22.7015	22.6166	22.9838	22.9248	23.7095	24.0217	24.2108	23.7589
Q2G111	Q2G111	rpsR	30S ribosomal protein S18	Completeproteome;Referenceproteome;Ribonucleoprotein;Ribosomalprotein;RNA-binding;rRNA-binding	9.3098	12	82.5	86427000000	296		0.0308046	-0.00866604	0.867589	29.267	29.1569	29.5036	29.3004	29.1539	29.2776	29.3848	29.4463
Q2G112	Q2G112	SAOUHSC_00349	Single-stranded DNA-binding protein	Completeproteome;DNA-binding;DNAdamage;DNArecombination;DNArepair;DNAreplication;Referenceproteome	18.539	20	89.2	28628000000	536	+	2.73897	0.203186	0.00127798	26.8305	26.9111	26.8847	26.7637	26.5992	26.6691	26.6862	26.6228
Q2G113	Q2G113	rpsF	30S ribosomal protein S6	Completeproteome;Referenceproteome;Ribonucleoprotein;Ribosomalprotein;RNA-binding;rRNA-binding	11.595	22	100	273820000000	889	+	1.92964	-0.205441	0.00619898	30.5992	30.489	30.6849	30.6328	30.7742	30.7244	30.9125	30.8166
Q2G115	Q2G115	ychF	Ribosome-binding ATPase YchF	ATP-binding;Completeproteome;Nucleotide-binding;Referenceproteome	40.594	47	96.2	72852000000	988	+	6.6184	0.59168	0	27.9765	27.9104	27.9439	27.9321	27.3376	27.309	27.3986	27.3509
Q2G116	Q2G116	SAOUHSC_00345		Completeproteome;Referenceproteome	7.8822	3	35.8	223000000	34	+	3.31825	1.03581	0.000572816	22.4279	22.1589	22.416	22.4506	21.0694	21.3008	21.2344	21.7056
Q2G117	Q2G117	SAOUHSC_00344		Completeproteome;Referenceproteome	32.186	8	31.1	2579500000	81	+	3.97201	1.19857	0.000432056	25.5176	25.9394	25.97	25.9061	24.4947	24.6984	24.5112	24.8347
Q2G118	Q2G118	SAOUHSC_00342		Completeproteome;Referenceproteome	32.855	11	40.2	837940000	70		0.0270253	0.0235825	0.882587	21.9579	22.4495	22.9204	23.1835	22.4197	22.7009	22.3749	22.9216
Q2G122	Q2G122	metE	5-methyltetrahydropteroyltriglutamate--homocysteine methyltransferase	Amino-acidbiosynthesis;Completeproteome;Metal-binding;Methioninebiosynthesis;Methyltransferase;Referenceproteome;Repeat;Transferase;Zinc	85.074	12	23.2	594550000	105		0.975137	0.29431	0.0521183	22.5567	22.2574	22.2549	22.7098	22.272	21.9452	22.001	22.3832
Q2G123	Q2G123	SAOUHSC_00337		Completeproteome;Referenceproteome	28.752	7	33.2	437670000	49		0.480919	0.0945635	0.185982	22.0437	21.8566	22.1555	22.0062	21.8442	21.8285	22.1085	21.9026
Q2G124	Q2G124	SAOUHSC_00336	Probable acetyl-CoA acyltransferase	Acyltransferase;Completeproteome;Cytoplasm;Referenceproteome;Transferase	41.703	25	77.6	7329300000	314	+	4.12166	-0.444246	0.000492063	24.9586	24.8024	24.9274	24.8872	25.3367	25.4208	25.2647	25.3304
Q2G126	Q2G126	SAOUHSC_00330		Completeproteome;Referenceproteome	14.517	5	52.7	987990000	67		0.101726	-0.0505056	0.6351	23.609	23.8834	23.7678	23.0634	23.6161	23.6055	23.6164	23.6877
Q2G132	Q2G132	SAOUHSC_00324		Completeproteome;Referenceproteome;Transferase	20.856	3	23.8	206130000	23	+	2.22869	-0.891213	0.00309456	21.5	21.895	21.8748	22.2218	22.3486	22.7153	22.9461	23.0466
Q2G135	Q2G135	SAOUHSC_00320		Completeproteome;Referenceproteome	21.314	3	16.5	225920000	27	+	1.86058	-0.918279	0.00687562	20.7203	20.7341	20.5436	21.4987	21.7001	21.8133	22.2159	21.4406
Q2G136	Q2G136	SAOUHSC_00319		Completeproteome;Referenceproteome	39.171	6	30	272010000	30	+	1.19729	-1.13314	0.0300156	19.6055	21.6356	21.4114	21.1477	22.1445	21.5511	22.1489	22.4882
Q2G138	Q2G138	SAOUHSC_00317		Completeproteome;Referenceproteome	50.167	3	4.9	175640000	28	+	3.8269	-1.23345	0.000401294	20.6399	20.6009	20.4438	20.7485	22.1899	21.8728	21.5708	21.7333
Q2G141	Q2G141	SAOUHSC_00314		Completeproteome;DNA-binding;Referenceproteome;Transcription;Transcriptionregulation	16.172	4	48.2	619340000	41		0.283038	-0.138763	0.337599	23.0297	23.5785	23.7369	23.5679	23.2839	23.9343	23.6217	23.6282
Q2G144	Q2G144	SAOUHSC_00311		Completeproteome;Phosphotransferasesystem;Referenceproteome;Transferase;Transport	10.398	6	67	2043100000	95	+	1.24769	-0.477524	0.0264056	24.2113	24.5816	24.1417	23.7338	24.891	24.4817	24.7439	24.4619
Q2G145	Q2G145	SAOUHSC_00310		Completeproteome;Referenceproteome	47.412	6	9.4	1046800000	66	+	2.87116	-0.630639	0.000786127	22.9608	23.426	23.2224	23.3631	23.8047	23.9616	23.7934	23.9352
Q2G146	Q2G146	SAOUHSC_00309		Completeproteome;Referenceproteome	37.776	24	69.2	6157000000	310	+	2.0964	-0.345326	0.00428571	24.0144	24.365	24.3437	24.3129	24.564	24.5425	24.69	24.6208
Q2G147	Q2G147	SAOUHSC_00308	Lipoate--protein ligase	ATP-binding;Completeproteome;Cytoplasm;Nucleotide-binding;Referenceproteome;Transferase	38.847	6	28.8	8797300000	75	+	1.26899	-0.377224	0.0250968	27.1874	27.0401	27.2428	26.8025	27.5601	27.2623	27.7378	27.2217
Q2G148	Q2G148	SAOUHSC_00307		Completeproteome;Referenceproteome	36.397	4	19.4	83748000	12		0.585682	-0.361184	0.138814	21.412	20.9978	20.323	20.8642	20.8271	21.6515	21.1045	21.4586
Q2G153	Q2G153	SAOUHSC_00302		Completeproteome;Referenceproteome	44.691	2	8.5	97938000	12	+	2.65493	-0.676194	0.00138593	20.6871	20.298	20.4272	20.8645	21.1743	21.2144	21.3444	21.2486
Q2G154	Q2G154	SAOUHSC_00301		Completeproteome;Referenceproteome	31.322	13	60.7	1722400000	189	+	6.61742	-0.930795	0	22.2915	22.3293	22.2369	22.1968	23.1308	23.2112	23.2305	23.2051
Q2G155	Q2G155	lip2	Lipase 2	Completeproteome;Hydrolase;Lipiddegradation;Lipidmetabolism;Referenceproteome;Secreted;Signal;Zymogen	76.387	4	12.3	118550000	16		0.447755	0.28091	0.205304	21.3036	21.2783	22.0555	21.4667	21.5949	21.6029	20.7259	21.0568
Q2G157	Q2G157	nanE	Putative N-acetylmannosamine-6-phosphate 2-epimerase	Carbohydratemetabolism;Completeproteome;Isomerase;Referenceproteome	24.545	5	21.2	971180000	43	+	3.43836	-1.05011	0.000609819	23.1141	22.8005	23.1831	23.3327	24.1679	24.3066	24.2651	23.8912
Q2G158	Q2G158	SAOUHSC_00297		Completeproteome;Referenceproteome	30.258	3	14.3	130870000	30	+	1.97627	-1.36414	0.00574413	19.316	20.7856	20.6854	19.7469	21.2605	21.7462	21.488	21.4958
Q2G159	Q2G159	SAOUHSC_00296		Completeproteome;Referenceproteome	31.683	6	28.7	894920000	72	+	3.72195	-1.08862	0.000380368	22.2883	22.2572	22.5909	22.5147	23.2322	23.5059	23.7506	23.5168
Q2G160	Q2G160	nanA	N-acetylneuraminate lyase	3D-structure;Carbohydratemetabolism;Completeproteome;Cytoplasm;Lyase;Referenceproteome;Schiffbase	33.042	10	49.5	1255700000	99	+	3.191	-0.841367	0.000663636	22.4218	22.3667	22.6091	22.83	23.5045	23.2132	23.5431	23.3324
Q2G163	Q2G163	psuG	Pseudouridine-5'-phosphate glycosidase	Completeproteome;Glycosidase;Hydrolase;Lyase;Manganese;Metal-binding;Referenceproteome	32.866	8	33.9	263180000	50	+	2.52315	-1.70937	0.00191817	19.9194	21.0994	19.6411	20.2432	22.3762	21.6601	21.9901	21.7143
Q2G167	Q2G167	SAOUHSC_00287		ATP-binding;Completeproteome;Nucleotide-binding;Referenceproteome	24.983	11	72	1452300000	145	+	2.03933	0.445765	0.00472193	23.0186	22.6843	23.1518	22.774	22.3354	22.5264	22.5413	22.4425
Q2G168	Q2G168	SAOUHSC_00285		Cellmembrane;Completeproteome;Membrane;Referenceproteome;Transmembrane;Transmembranehelix	38.424	4	15.2	179950000	19	+	1.56465	0.281621	0.0131251	21.7428	21.5587	21.4004	21.639	21.2521	21.3906	21.4265	21.1453
Q2G170	Q2G170	SAOUHSC_00284		Completeproteome;Lipoprotein;Referenceproteome	33.352	30	79.4	15871000000	442		0.669946	-0.129072	0.110861	26.8125	27.1658	27.1067	27.0772	27.1966	27.2423	27.0222	27.2174
Q2G174	Q2G174	SAOUHSC_00279		Completeproteome;Referenceproteome	14.631	3	24.2	32924000	8	+	1.05997	-0.356498	0.0422477	19.8844	20.0952	20.484	20.2865	20.5145	20.4422	20.8813	20.3381
Q2G178	Q2G178	SAOUHSC_00269		Completeproteome;Referenceproteome	19.732	10	65.6	1178500000	65	+	2.70894	-1.00389	0.00134043	22.491	21.9033	22.0038	22.5846	23.4584	23.0416	23.2952	23.203
Q2G183	Q2G183	SAOUHSC_00264		Completeproteome;Referenceproteome	14.937	1	8.5	16301000	3		0.225805	-0.299872	0.40745	20.7596	20.0612	19.0028	21.4659	20.687	20.7934	20.3483	20.6603
Q2G185	Q2G185	SAOUHSC_00261		3D-structure;Completeproteome;Referenceproteome	52.023	4	11	507830000	19	+	3.33893	-0.955297	0.000582716	22.9921	23.1003	22.8339	23.114	23.9562	23.8123	23.7791	24.314
Q2G188	Q2G188	SAOUHSC_00258		Completeproteome;Referenceproteome	114.82	11	18.8	496330000	36	+	2.43792	-1.64551	0.00208531	20.8195	22.0088	21.1439	22.0939	23.589	22.8021	23.0464	23.2106
Q2G189	Q2G189	SAOUHSC_00257	ESAT-6-like protein	Completeproteome;Referenceproteome	11.036	15	99	12350000000	213	+	1.83546	-0.889398	0.00729208	26.7343	26.9447	26.8989	25.8486	27.5872	27.4667	27.5712	27.359
Q2G193	Q2G193	SAOUHSC_00253		Completeproteome;Referenceproteome	57.922	22	51.7	2484200000	172	+	4.52934	-0.791623	0	23.7221	23.5361	23.5558	23.5211	24.2821	24.5235	24.3723	24.3237
Q2G196	Q2G196	SAOUHSC_00249		ATP-binding;Completeproteome;Nucleotide-binding;Referenceproteome	25.162	6	33.8	1661100000	18		0.330183	0.76627	0.290297	24.6484	25.371	25.677	25.1811	21.5724	25.5566	25.1637	25.5196
Q2G198	Q2G198	SAOUHSC_00247		Completeproteome;Referenceproteome	37.048	2	7.9	118840000	18	+	2.5836	-0.882685	0.0016	21.0422	20.7818	20.6162	20.801	21.235	21.9235	21.7733	21.8402
Q2G1A1	Q2G1A1	SAOUHSC_00244		Completeproteome;Referenceproteome	15.765	7	37.7	1002800000	89	+	3.1156	-0.843045	0.000646018	23.0905	23.3251	23.5493	23.5037	23.9649	24.2368	24.3525	24.2867
Q2G1A5	Q2G1A5	rbsD	D-ribose pyranase	3D-structure;Carbohydratemetabolism;Completeproteome;Cytoplasm;Isomerase;Referenceproteome	15.165	11	97.8	1896300000	130	+	5.06477	-0.859951	0	23.4153	23.5471	23.5397	23.5192	24.4225	24.2282	24.4738	24.3366
Q2G1A6	Q2G1A6	SAOUHSC_00239		Completeproteome;Kinase;Referenceproteome;Transferase	32.448	29	75	9115600000	474	+	4.88159	-0.820645	0	24.4129	24.3218	24.3619	24.5974	25.2947	25.2112	25.2328	25.2378
Q2G1A8	Q2G1A8	SAOUHSC_00237		Completeproteome;Referenceproteome	28.347	3	13.8	135280000	10		0.301885	-0.266705	0.319343	21.8277	21.4509	21.7681	20.3062	21.8543	21.541	21.3329	21.6915
Q2G1A9	Q2G1A9	SAOUHSC_00236		Completeproteome;Glycosidase;Hydrolase;Referenceproteome	54.708	14	31.2	1356300000	124	+	5.28551	-1.31185	0	22.3233	22.308	22.2656	22.5659	23.7028	23.5427	23.8021	23.6625
Q2G1B0	Q2G1B0	SAOUHSC_00235		Completeproteome;Kinase;Phosphotransferasesystem;Referenceproteome;Sugartransport;Transferase;Transport	29.137	2	14.1	60621000	16	+	2.01039	-1.75663	0.00512169	19.5605	18.4571	19.7336	19.2496	21.1996	21.5952	21.3295	19.903
Q2G1B1	Q2G1B1	SAOUHSC_00234		Completeproteome;DNA-binding;Referenceproteome;Transcription;Transcriptionregulation	27.013	7	49.6	396220000	75		0.585333	0.315192	0.138929	22.2551	22.3006	22.0708	22.7024	21.4146	22.1216	22.0929	22.439
Q2G1B7	Q2G1B7	SAOUHSC_00228		Completeproteome;Referenceproteome	66.313	43	69.3	29744000000	686	+	4.90507	0.541006	0	27.0445	27.0782	27.1726	27.1977	26.5501	26.6231	26.6065	26.5492
Q2G1B8	Q2G1B8	SAOUHSC_00227		Completeproteome;Referenceproteome	66.074	38	55.5	18345000000	631	+	5.67924	0.576908	0	26.4401	26.4129	26.3628	26.3484	25.7902	25.7946	25.8876	25.7841
Q2G1B9	Q2G1B9	SAOUHSC_00226		Completeproteome;Referenceproteome	38.451	27	84.8	31808000000	435		0.47529	-0.142399	0.1887	27.0906	27.383	27.3839	27.5979	27.2669	27.4913	27.609	27.6579
Q2G1C0	Q2G1C0	ispD	2-C-methyl-D-erythritol 4-phosphate cytidylyltransferase	Completeproteome;Isoprenebiosynthesis;Nucleotidyltransferase;Referenceproteome;Transferase	26.656	32	95.8	43048000000	724	+	2.85036	-0.265119	0.000913628	27.5612	27.4934	27.5605	27.6724	27.7793	27.8021	27.8532	27.9133
Q2G1C1	Q2G1C1	SAOUHSC_00223		Completeproteome;Referenceproteome	45.961	15	37	2844100000	197		0.37333	-0.0711508	0.254296	24.1569	24.1262	24.2651	24.1758	24.1406	24.2851	24.1256	24.4573
Q2G1C2	Q2G1C2	SAOUHSC_00222		Completeproteome;Referenceproteome	60.183	14	46.8	1628500000	118	+	1.20535	0.175422	0.0293789	24.444	24.3483	24.2737	24.442	24.2378	24.1058	24.0931	24.3696
Q2G1C4	Q2G1C4	SAOUHSC_00221		Completeproteome;Referenceproteome	38.558	5	35.2	362090000	57		0.307606	-0.141069	0.31327	22.4191	22.2859	22.8566	22.9479	22.7052	22.5106	22.8582	22.9997
Q2G1C5	Q2G1C5	SAOUHSC_00200		Completeproteome;Referenceproteome	42.183	5	16.6	187940000	17	+	1.38458	0.74567	0.0193811	21.9235	22.0835	22.0652	22.1556	21.7062	21.4983	21.571	20.4696
Q2G1C7	Q2G1C7	SAOUHSC_00198		Completeproteome;Referenceproteome	56.205	8	19.4	89460000	20		0.362191	-0.423133	0.262369	19.3385	19.6179	20.8639	21.1649	20.2002	21.1271	20.3685	20.9819
Q2G1C8	Q2G1C8	SAOUHSC_00197		Completeproteome;FAD;Flavoprotein;Oxidoreductase;Referenceproteome	44.728	9	27.5	499310000	59	+	1.58123	-2.58962	0.0126674	17.0229	20.5541	20.953	19.4445	22.096	22.0964	22.0483	22.0923
Q2G1C9	Q2G1C9	SAOUHSC_00196		Completeproteome;Fattyacidmetabolism;Lipidmetabolism;NAD;Oxidoreductase;Referenceproteome	84.607	17	29.1	728060000	65	+	3.63783	-2.08913	0.000527859	21.0464	20.2303	21.0623	21.1911	22.7493	22.7719	22.9619	23.4035
Q2G1D0	Q2G1D0	SAOUHSC_00195		Acyltransferase;Completeproteome;Referenceproteome;Transferase	41.836	3	13.5	342100000	10	+	1.219	-0.146242	0.0283458	22.8882	22.7495	22.8803	22.828	22.9082	22.9393	23.1455	22.938
Q2G1D3	Q2G1D3	SAOUHSC_00192		Completeproteome;Referenceproteome	71.717	1	3.1	25475000	2		0.690467	0.800231	0.104981	21.3435	20.9685	21.4549	21.4836	21.6209	18.9953	20.7051	20.7283
Q2G1D4	Q2G1D4	SAOUHSC_00191		Completeproteome;Referenceproteome	12.829	3	33.3	59158000	10	+	2.3621	-1.1844	0.0026	18.8844	19.8874	19.2559	19.6388	20.2507	20.8834	20.8172	20.4527
Q2G1D5	Q2G1D5	SAOUHSC_00190		Completeproteome;Referenceproteome	67.716	6	11.6	311450000	12		0.402139	-0.118201	0.234215	22.8406	22.6571	22.5847	22.8729	22.964	22.7729	22.5972	23.0939
Q2G1D7	Q2G1D7	pflA	Pyruvate formate-lyase-activating enzyme	4Fe-4S;Carbohydratemetabolism;Completeproteome;Cytoplasm;Glucosemetabolism;Iron;Iron-sulfur;Metal-binding;Oxidoreductase;Referenceproteome;S-adenosyl-L-methionine	28.498	16	57.8	18858000000	343		0.167605	0.0369353	0.494443	27.0242	27.235	27.2197	27.3866	27.1289	27.2963	27.1112	27.1813
Q2G1D8	Q2G1D8	pflB	Formate acetyltransferase	Acyltransferase;Carbohydratemetabolism;Completeproteome;Cytoplasm;Glucosemetabolism;Organicradical;Referenceproteome;Transferase	84.861	117	92.4	1125000000000	3623	+	1.63478	-0.132689	0.0109795	32.1091	32.2532	32.2342	32.2924	32.3789	32.3494	32.3041	32.3872
Q2G1D9	Q2G1D9	SAOUHSC_00186		Completeproteome;Lipoprotein;Referenceproteome	36.932	10	31.7	611120000	78	+	2.07819	0.984131	0.00429891	22.1857	22.7042	22.6515	23.2079	21.3134	21.6515	21.8832	21.9647
Q2G1E0	Q2G1E0	SAOUHSC_00185	Uncharacterized sensor-like histidine kinase SAOUHSC_00185	ATP-binding;Cellmembrane;Completeproteome;Kinase;Membrane;Nucleotide-binding;Phosphoprotein;Referenceproteome;Transferase;Transmembrane;Transmembranehelix;Two-componentregulatorysystem	61.046	9	26.6	227390000	27	+	1.2902	0.738374	0.0239756	21.4413	22.3489	22.5806	22.5483	21.621	21.8023	21.4096	21.1326
Q2G1E1	Q2G1E1	SAOUHSC_00184	Uncharacterized response regulatory protein SAOUHSC_00184	Completeproteome;Cytoplasm;DNA-binding;Phosphoprotein;Referenceproteome;Transcription;Transcriptionregulation;Two-componentregulatorysystem	29.599	5	27.4	520830000	32	+	3.19257	0.834266	0.000665148	23.2028	23.4068	23.5709	23.6353	22.6392	22.8288	22.5968	22.4138
Q2G1E3	Q2G1E3	SAOUHSC_00182		Completeproteome;Referenceproteome	21.779	4	17.9	357910000	45	+	2.41346	-0.423903	0.0023876	22.2876	22.3651	22.3732	22.2377	22.9828	22.7396	22.5821	22.6546
Q2G1E4	Q2G1E4	SAOUHSC_00181		Completeproteome;Referenceproteome	36.671	10	43.5	3353100000	116	+	2.02037	-0.701741	0.00489774	25.2215	26.0089	25.7562	25.8785	26.4333	26.4794	26.2129	26.5463
Q2G1E5	Q2G1E5	SAOUHSC_00180		Completeproteome;Referenceproteome	38.557	17	36.1	1091700000	129	+	2.9559	-0.859813	0.000697395	22.7409	22.8147	22.7098	23.0243	23.3827	23.6302	24.0086	23.7075
Q2G1E6	Q2G1E6	SAOUHSC_00179		Completeproteome;Referenceproteome	39.18	19	44.1	2604400000	146	+	5.23751	-0.750624	0	24.4985	24.5596	24.4616	24.6763	25.3073	25.335	25.2482	25.3079
Q2G1E9	Q2G1E9	SAOUHSC_00176		3D-structure;Completeproteome;Referenceproteome	47.85	19	47.5	867930000	134	+	2.4698	-0.625725	0.00202871	21.5412	21.9149	21.7568	22.1356	22.5938	22.3824	22.4499	22.4253
Q2G1F0	Q2G1F0	SAOUHSC_00175		ATP-binding;Completeproteome;Nucleotide-binding;Referenceproteome;Transport	41.334	13	39.7	1945500000	170	+	2.04112	-0.344309	0.00474094	23.631	23.7247	23.7073	24.0228	24.0944	24.0754	24.2013	24.0919
Q2G1F2	Q2G1F2	azoR	FMN-dependent NADH-azoreductase	Completeproteome;Flavoprotein;FMN;NAD;Oxidoreductase;Referenceproteome	23.352	14	97.1	1839300000	133	+	3.39411	-0.723181	0.00059596	23.059	22.9242	23.3281	23.0147	23.7176	23.7619	23.963	23.7762
Q2G1F8	Q2G1F8	SAOUHSC_00167		ATP-binding;Completeproteome;Nucleotide-binding;Referenceproteome;Transport	59.176	9	31.1	604570000	43	+	2.62476	-0.95546	0.00150422	22.9109	22.4969	22.6601	23.052	23.8259	24.1003	23.4772	23.5385
Q2G1G0	Q2G1G0	SAOUHSC_00164		Completeproteome;Referenceproteome	35.548	14	42.7	1982800000	150	+	1.05667	0.256862	0.0425018	23.7058	23.9077	23.8788	23.7918	23.3789	23.346	23.7312	23.8006
Q2G1G2	Q2G1G2	SAOUHSC_00162		Completeproteome;Hydrolase;Referenceproteome	109.23	36	41.9	3025200000	356		0.675353	0.0812731	0.109161	22.9738	23.0487	23.106	23.1723	22.8748	23.0225	23.0369	23.0414
Q2G1G4	Q2G1G4	SAOUHSC_00160		Completeproteome;Referenceproteome	32.987	7	33.3	731990000	63	+	3.17531	-3.48432	0.000660633	18.7736	20.9477	20.7027	19.3274	23.4935	23.1274	23.3442	23.7235
Q2G1G5	Q2G1G5	SAOUHSC_00158	Permease IIC component;Phosphotransferase enzyme IIB component;PTS system EIIBC component SAOUHSC_00158	Cellmembrane;Completeproteome;Kinase;Membrane;Phosphotransferasesystem;Referenceproteome;Sugartransport;Transferase;Transmembrane;Transmembranehelix;Transport	50.664	12	22.3	2159900000	114	+	5.8128	-2.1086	0	23.4889	23.5429	23.5939	23.5457	25.5476	25.4732	25.9737	25.6111
Q2G1G6	Q2G1G6	murQ	N-acetylmuramic acid 6-phosphate etherase	Carbohydratemetabolism;Completeproteome;Lyase;Referenceproteome	32.382	10	40.8	656670000	23		0.647681	-1.05672	0.117132	19.6009	22.8176	22.778	21.5892	22.8774	22.1626	22.8711	23.1016
Q2G1G7	Q2G1G7	SAOUHSC_00156		Completeproteome;Referenceproteome	39.868	9	27.7	326860000	60	+	2.63374	-2.25884	0.00150931	20.2773	19.1389	20.6619	21.1996	22.4202	22.765	22.721	22.4069
Q2G1G8	Q2G1G8	ptsG	Glucose permease IIC component;Glucose-specific phosphotransferase enzyme IIA component;Glucose-specific phosphotransferase enzyme IIB component;PTS system glucose-specific EIICBA component	Cellmembrane;Completeproteome;Kinase;Membrane;Phosphotransferasesystem;Referenceproteome;Sugartransport;Transferase;Transmembrane;Transmembranehelix;Transport	73.924	22	39.8	7680200000	297	+	3.66903	-0.632425	0.000365782	25.567	25.8725	25.7524	25.7532	26.4727	26.4002	26.3628	26.2391
Q2G1H0	Q2G1H0	SAOUHSC_00153		Completeproteome;Pyruvate;Referenceproteome	60.538	26	72.2	17729000000	586	+	6.50948	-2.18759	0	24.1991	24.4138	24.3477	24.3545	26.3582	26.4394	26.7132	26.5547
Q2G1H9	Q2G1H9	SAOUHSC_00144		Completeproteome;Phosphopantetheine;Referenceproteome	273.48	21	14.3	1918100000	105		0.822633	-0.193156	0.0755424	24.3023	24.0337	24.5695	24.2204	24.4699	24.4301	24.5803	24.4184
Q2G1I1	Q2G1I1	SAOUHSC_00142		Completeproteome;Referenceproteome	38.118	11	43.7	819540000	98		0.205964	-0.106358	0.43381	22.6364	22.8231	22.9034	22.5795	22.5125	22.6089	23.3608	22.8857
Q2G1I2	Q2G1I2	SAOUHSC_00141		Completeproteome;Referenceproteome	13.98	4	31.9	54602000	16		0.539868	-0.62432	0.157579	19.2439	20.1998	18.8687	19.6291	19.3194	21.4199	19.8963	19.8033
Q2G1I7	Q2G1I7	SAOUHSC_00135		Completeproteome;Referenceproteome	19.257	6	54.7	838330000	78	+	3.63061	-1.04525	0.000526316	22.8123	22.8523	22.3577	22.4868	23.6414	23.7978	23.7181	23.5329
Q2G1I8	Q2G1I8	SAOUHSC_00134		Completeproteome;Referenceproteome	7.6627	2	32.8	273880000	31	+	3.42039	-1.17805	0.000603581	21.2288	20.8642	20.9107	20.4698	21.8916	22.1325	22.114	22.0476
Q2G1J0	Q2G1J0	aldA	Putative aldehyde dehydrogenase AldA	Completeproteome;NAD;Oxidoreductase;Referenceproteome	53.658	49	84.8	47483000000	806	+	4.67541	-1.41503	0	25.9574	26.03	25.7257	26.0225	27.104	27.3483	27.5666	27.3768
Q2G1J2	Q2G1J2	isdI	Heme oxygenase (staphylobilin-producing) 2	Completeproteome;Cytoplasm;Heme;Iron;Metal-binding;Monooxygenase;Oxidoreductase;Referenceproteome	12.791	10	93.5	896810000	94	+	3.55426	-0.375257	0.0005	23.1428	23.0551	23.1201	22.9717	23.3902	23.5373	23.4378	23.4253
Q2G1J3	Q2G1J3	SAOUHSC_00129		Completeproteome;Isomerase;Referenceproteome	43.108	14	40.7	783520000	95	+	4.44971	-1.17771	0	20.5775	20.4069	20.6223	20.8456	21.9343	21.6712	21.7189	21.8387
Q2G1J4	Q2G1J4	SAOUHSC_00128		Completeproteome;Oxidoreductase;Referenceproteome	46.8	12	36	1774800000	35		0.767444	1.15074	0.0871417	25.6343	25.1065	26.0001	25.0161	24.7178	23.355	26.0805	23.0008
Q2G1J5	Q2G1J5	SAOUHSC_00127		Completeproteome;Isomerase;Referenceproteome	33.683	5	23.4	103100000	12		0.0404375	0.0884404	0.827672	20.7329	20.8854	18.3554	20.5803	19.6503	19.0311	20.2952	21.2235
Q2G1J7	Q2G1J7	SAOUHSC_00125		Completeproteome;Referenceproteome;Transferase	46.576	3	8.2	530440000	10	+	2.34512	-0.467551	0.00258824	23.4869	23.4317	23.3636	23.0294	23.839	23.7465	23.8434	23.7529
Q2G1K0	Q2G1K0	SAOUHSC_00122		Completeproteome;Referenceproteome	42.58	6	16	964330000	47		0.0879075	-0.0884771	0.669084	21.9782	23.2358	23.5564	23.2012	23.3704	22.8722	23.1475	22.9353
Q2G1K2	Q2G1K2	SAOUHSC_00120		Completeproteome;Isomerase;Referenceproteome	42.851	13	39	427740000	54		0.355817	0.297781	0.267851	20.0174	19.9894	19.879	19.9562	20.6913	19.2596	19.61	19.09
Q2G1K3	Q2G1K3	SAOUHSC_00119		Completeproteome;Referenceproteome	42.266	2	8.7	23992000	4		NaN	0	1	19.0632	21.7303	20.5485	19.9896	20.71	20.9752	20.1774	18.8753
Q2G1K4	Q2G1K4	SAOUHSC_00118		Completeproteome;Referenceproteome	38.591	5	20.8	93141000	10		NaN	0	1	20.3128	20.0242	20.1847	19.0291	20.0771	20.47	21.4468	20.5254
Q2G1K5	Q2G1K5	SAOUHSC_00117		Completeproteome;Referenceproteome	68.64	8	14.5	478440000	22		0.978541	0.478789	0.051781	23.0084	23.3397	23.0062	23.1489	23.0965	22.9126	22.0125	22.5666
Q2G1K6	Q2G1K6	SAOUHSC_00116		Completeproteome;Referenceproteome	29.361	2	8.7	59347000	7		0.0968755	0.174783	0.647199	18.8119	21.1806	20.4505	20.1821	19.6388	21.2615	19.2993	19.7263
Q2G1K7	Q2G1K7	SAOUHSC_00115		Completeproteome;Referenceproteome	25.285	12	68.9	1593700000	96		0.58441	-0.821385	0.139051	20.719	23.6534	23.1482	23.1432	23.5409	23.5624	23.4065	23.4395
Q2G1K8	Q2G1K8	SAOUHSC_00114		Completeproteome;Referenceproteome	24.854	6	41	238820000	30		0.774967	-0.61517	0.0849959	20.3808	19.4268	20.7491	19.2652	20.8796	20.1873	20.4759	20.7399
Q2G1K9	Q2G1K9	SAOUHSC_00113	Aldehyde-alcohol dehydrogenase	Completeproteome;Oxidoreductase;Referenceproteome	94.944	113	82.4	365560000000	2741	+	5.08922	-1.67735	0	28.9528	29.1209	29.1798	28.9106	30.9799	30.4908	30.708	30.6949
Q2G1L5	Q2G1L5	SAOUHSC_00107		3D-structure;Completeproteome;Magnesium;Manganese;Metal-binding;Referenceproteome;Zinc	58.11	6	17.8	258910000	33		0.945116	0.448617	0.0555982	22.0553	22.217	22.1237	22.3918	21.2776	21.4433	22.0248	22.2476
Q2G1L7	Q2G1L7	SAOUHSC_00105		Completeproteome;Referenceproteome	35	4	15.7	254340000	9		0.247279	-0.191878	0.377664	22.518	22.5455	22.8833	22.3311	22.4525	22.5546	23.6389	22.3994
Q2G1M1	Q2G1M1	SAOUHSC_00086		Completeproteome;Oxidoreductase;Referenceproteome	27.215	24	72.9	21411000000	404	+	4.89554	0.903788	0	28.3517	28.3514	28.2737	28.3264	27.5595	27.4776	27.407	27.244
Q2G1M2	Q2G1M2	SAOUHSC_00085		Completeproteome;Referenceproteome	22.98	3	20.2	119510000	18		0.63966	-0.483892	0.11987	21.8054	21.0856	20.6754	21.0173	22.1702	21.9827	21.3789	20.9875
Q2G1M8	Q2G1M8	SAOUHSC_00080		Completeproteome;Referenceproteome	71.951	3	7.8	51326000	10		0.312564	0.335437	0.308539	20.4963	20.669	21.1598	20.3725	19.9233	19.7476	20.1098	21.5752
Q2G1N2	Q2G1N2	SAOUHSC_00076		Completeproteome;Lyase;Referenceproteome	37.748	3	20.2	151180000	11	+	1.52068	1.08062	0.0146176	21.88	22.0125	22.1319	22.3381	21.3263	20.7784	21.8293	20.1059
Q2G1N3	Q2G1N3	sbnA	Probable siderophore biosynthesis protein SbnA	Completeproteome;Pyridoxalphosphate;Referenceproteome	35.897	3	16.6	1975400000	25		0.436998	-0.120211	0.211698	25.4136	25.8854	25.6411	25.824	25.712	25.8796	25.7018	25.9516
Q2G1N4	Q2G1N4	SAOUHSC_00074		Completeproteome;Referenceproteome	36.744	32	76.4	8470100000	354	+	5.63735	1.42759	0	26.5819	26.7908	26.5122	26.4953	25.1276	25.0619	25.2726	25.2078
Q2G1N7	Q2G1N7	sarS	HTH-type transcriptional regulator SarS	3D-structure;Activator;Completeproteome;Cytoplasm;Directproteinsequencing;DNA-binding;Referenceproteome;Repeat;Repressor;Transcription;Transcriptionregulation;Virulence	29.889	11	41.2	1184700000	64	+	4.0707	4.16277	0.000473282	24.7724	25.635	25.2688	25.382	20.0197	21.8154	21.6313	20.9406
Q2G1N9	Q2G1N9	SAOUHSC_00067		Completeproteome;Referenceproteome	56.19	5	13.4	395710000	33		0.356236	-0.217639	0.267527	22.1752	22.9376	23.0896	22.1239	22.854	22.8613	22.9136	22.568
Q2G1P3	Q2G1P3	SAOUHSC_00061		Completeproteome;Referenceproteome	67.648	10	33	738240000	24		0.0915579	0.0474377	0.660055	23.3102	23.0774	22.937	22.5997	23.0843	22.6965	22.7772	23.1765
Q2G1P4	Q2G1P4	SAOUHSC_00060		Completeproteome;Referenceproteome	60.647	21	26.8	2680800000	191	+	4.27329	1.09378	0.000304933	25.0161	25.3798	25.0856	25.3009	23.9121	24.1824	24.1276	24.1853
Q2G1P6	Q2G1P6	SAOUHSC_00057		Completeproteome;Referenceproteome	43.097	6	19.1	151970000	16	+	1.08519	-0.450243	0.0396449	19.234	19.7661	19.1043	19.8718	19.7526	20.182	20.0419	19.8005
Q2G1P9;Q2G1P8	Q2G1P9;Q2G1P8	SAOUHSC_00054;SAOUHSC_00055	Uncharacterized lipoprotein SAOUHSC_00054;Uncharacterized lipoprotein SAOUHSC_00055	Cellmembrane;Completeproteome;Lipoprotein;Membrane;Palmitate;Referenceproteome;Signal	29.577	7	22.4	246380000	49	+	3.04737	-0.923138	0.000617336	21.0959	21.0602	20.5281	20.8543	21.6242	21.8696	21.7505	21.9867
Q2G1Q2	Q2G1Q2	plc	1-phosphatidylinositol phosphodiesterase	Completeproteome;Hydrolase;Lipiddegradation;Lipidmetabolism;Lyase;Referenceproteome;Secreted;Signal;Transducer;Virulence	37.086	5	17.7	28087000	11		0.18867	0.133169	0.458032	20.5857	20.1456	20.1224	19.8891	20.4182	19.5212	19.7912	20.4795
Q2G1Q4	Q2G1Q4	SAOUHSC_00049		Completeproteome;Referenceproteome	121.73	33	46.1	1791200000	228	+	1.0819	-0.165202	0.0400224	22.9394	23.0566	23.1694	23.2045	23.2631	23.3778	23.2663	23.1235
Q2G1Q6	Q2G1Q6	SAOUHSC_00046		Completeproteome;DNA-binding;Referenceproteome;Transcription;Transcriptionregulation	28.421	3	16.2	13607000	4		0.759716	0.712547	0.0884132	19.0727	21.0795	19.5069	20.5123	19.3956	19.4537	19.24	19.2319
Q2G1Q8	Q2G1Q8	SAOUHSC_00044		Completeproteome;DNA-binding;Referenceproteome;Transcription;Transcriptionregulation	33.41	9	34.6	700470000	38		0.373107	-0.378889	0.254462	23.3224	24.6724	22.6293	23.4736	23.9197	23.8386	24.2179	23.6371
Q2G1R1	Q2G1R1	SAOUHSC_00041		Completeproteome;Referenceproteome	11.139	3	39.8	125720000	11	+	1.22235	-1.06561	0.0281732	18.9578	20.4808	20.7401	20.6519	21.7821	21.3369	20.9846	20.9894
Q2G1R3	Q2G1R3	SAOUHSC_00039	tRNA-dihydrouridine synthase	Completeproteome;FAD;Flavoprotein;Oxidoreductase;Referenceproteome;tRNAprocessing	35.562	7	35.8	779630000	63	+	5.06868	-1.55889	0	21.8479	21.7335	21.8281	21.9874	23.1455	23.379	23.5035	23.6043
Q2G1R5	Q2G1R5	SAOUHSC_00037		Completeproteome;Oxidoreductase;Referenceproteome	44.84	5	18.9	54133000	19		0.779229	-0.786244	0.08407	19.9725	19.538	21.227	19.4681	20.1319	20.603	21.3383	21.2774
Q2G1R8	Q2G1R8	SAOUHSC_00034		Completeproteome;Referenceproteome	9.6411	1	25.6	490230000	26	+	1.01611	-0.315963	0.046612	22.9155	22.4242	22.7178	22.2796	23.0092	23.0275	22.7241	22.8402
Q2G1R9	Q2G1R9	metG	Methionine--tRNA ligase	Aminoacyl-tRNAsynthetase;ATP-binding;Completeproteome;Cytoplasm;Ligase;Nucleotide-binding;Proteinbiosynthesis;Referenceproteome;RNA-binding;tRNA-binding	74.885	64	72.6	41452000000	1182	+	3.80037	0.231352	0.000394904	26.848	26.9024	26.9416	26.9677	26.6804	26.6604	26.7054	26.6881
Q2G1S1	Q2G1S1	rsmI	Ribosomal RNA small subunit methyltransferase I	Completeproteome;Cytoplasm;Methyltransferase;Referenceproteome;rRNAprocessing;S-adenosyl-L-methionine;Transferase	31.274	13	57.3	2710500000	108	+	3.43272	0.7126	0.000606684	24.6159	24.8101	25.0266	24.9884	24.104	24.0841	24.2123	24.1902
Q2G1S2	Q2G1S2	SAOUHSC_00462		Completeproteome;Referenceproteome	29.281	17	50.6	6438600000	292		0.675997	0.144513	0.10903	25.5792	25.4202	25.7003	25.6341	25.2892	25.3027	25.6204	25.5434
Q2G1S3	Q2G1S3	purA	Adenylosuccinate synthetase	Completeproteome;Cytoplasm;GTP-binding;Ligase;Magnesium;Metal-binding;Nucleotide-binding;Purinebiosynthesis;Referenceproteome	47.578	30	64.2	12458000000	441	+	3.87814	-0.673228	0.000409241	26.0428	26.2597	26.2273	26.2613	26.7568	26.9971	26.7905	26.9394
Q2G1S4	Q2G1S4	SAOUHSC_00018		ATP-binding;Completeproteome;DNA-binding;DNAreplication;Helicase;Hydrolase;Nucleotide-binding;Referenceproteome	52.57	22	43.6	4671500000	257		0.0585265	0.015203	0.761379	24.5008	24.4577	24.6466	24.7585	24.4833	24.4743	24.6156	24.7296
Q2G1T1	Q2G1T1	SAOUHSC_00827		Completeproteome;Referenceproteome	21.342	5	28.5	522270000	78	+	2.82593	-1.08765	0.000982987	21.5714	20.6631	21.3815	21.2377	22.3185	22.36	22.2545	22.2713
Q2G1T3	Q2G1T3	SAOUHSC_00831	Organic hydroperoxide resistance protein-like	Completeproteome;Referenceproteome	15.339	4	27.1	68540000	12		0.0864163	0.135401	0.672913	20.3381	20.4866	19.0968	19.8083	19.3124	20.9461	18.7894	20.1403
Q2G1T4	Q2G1T4	SAOUHSC_00830		Completeproteome;Referenceproteome	18.962	8	79.9	3954100000	98	+	6.27415	-0.885525	0	25.4583	25.4349	25.4191	25.4472	26.3983	26.3852	26.2729	26.2452
Q2G1T6	Q2G1T6	gtaB	UTP--glucose-1-phosphate uridylyltransferase	Carbohydratemetabolism;Completeproteome;Nucleotidyltransferase;Referenceproteome;Transferase	32.451	30	94.1	14618000000	563	+	3.04394	0.21	0.000614737	25.7303	25.7391	25.6519	25.7909	25.4662	25.5442	25.5115	25.5504
Q2G1T9	Q2G1T9	rpoZ	DNA-directed RNA polymerase subunit omega	Completeproteome;DNA-directedRNApolymerase;Nucleotidyltransferase;Referenceproteome;Transcription;Transferase	8.1501	12	100	20691000000	256		0.853573	-0.289756	0.0702139	26.4802	26.6667	27.0034	26.2482	26.7174	26.8971	26.9577	26.9853
Q2G1U0	Q2G1U0	gmk	Guanylate kinase	ATP-binding;Completeproteome;Cytoplasm;Kinase;Nucleotide-binding;Referenceproteome;Transferase	24.037	17	53.1	9177000000	264	+	1.46245	0.210227	0.0165282	25.5095	25.1516	25.383	25.3526	25.102	25.1552	25.1926	25.1058
Q2G1U1	Q2G1U1	SAOUHSC_01175		Completeproteome;Referenceproteome	65.784	46	73.6	10670000000	531	+	3.00623	0.538646	0.000604555	25.0868	25.2585	25.3779	25.3485	24.7138	24.9089	24.6409	24.6535
Q2G1U2	Q2G1U2	SAOUHSC_01174		Completeproteome;Referenceproteome	14.859	3	39.1	792170000	42	+	1.18558	-0.163628	0.0307183	23.6416	23.8185	23.8006	23.6959	23.7858	23.8975	24.0656	23.8622
Q2G1U3	Q2G1U3	SAOUHSC_00937		Completeproteome;Hydrolase;Referenceproteome	69.819	55	64.8	25218000000	982	+	4.19006	-0.480354	0.000282158	25.3332	25.4929	25.3808	25.4443	25.917	25.8667	25.9742	25.8147
Q2G1U5	Q2G1U5	mecA	Adapter protein MecA	Completeproteome;Referenceproteome	28.325	7	20.9	989480000	77		0.318061	-0.0935445	0.302098	22.4849	22.7772	22.6145	22.999	22.9194	22.9011	22.7149	22.7143
Q2G1U6	Q2G1U6	spxA	Regulatory protein Spx	Completeproteome;Cytoplasm;Disulfidebond;Redox-activecenter;Referenceproteome;Transcription;Transcriptionregulation	15.44	15	84.7	6407700000	185	+	2.83638	0.67845	0.000906667	25.7295	25.9985	25.8774	25.6116	24.9509	25.0317	25.1642	25.3564
Q2G1U8	Q2G1U8	SAOUHSC_02690		Completeproteome;Referenceproteome;Transport	59.186	17	28.5	3114200000	268		0.351376	-0.0714674	0.271649	23.827	24.0332	24.1637	24.1731	24.195	24.161	24.0575	24.0694
Q2G1U9	Q2G1U9	SAOUHSC_02689		Completeproteome;Referenceproteome	17.419	12	86.5	2163800000	165	+	2.42068	0.45721	0.00227769	23.4004	23.247	23.6246	23.6663	23.067	23.0345	22.9809	23.0271
Q2G1V0	Q2G1V0	SAOUHSC_02687		Completeproteome;Referenceproteome	30.669	5	19.7	2144000000	123	+	3.13525	0.763228	0.000650334	25.2789	25.2867	25.2724	25.3354	24.6705	24.6923	24.178	24.5797
Q2G1V1	Q2G1V1	SAOUHSC_02686		Completeproteome;Referenceproteome	20.439	7	32	1148500000	117	+	3.49195	0.749602	0.000478723	23.5069	23.5608	23.8062	23.8108	22.7396	22.9628	23.0297	22.9542
Q2G1V4	Q2G1V4	SAOUHSC_00333		ATP-binding;Completeproteome;Nucleotide-binding;Referenceproteome	31.594	9	38.2	1647000000	78	+	1.15549	-0.391197	0.0326004	24.6991	24.678	24.4588	24.9642	25.5204	24.9351	24.9077	25.0016
Q2G1V6	Q2G1V6	SAOUHSC_00334		Completeproteome;Referenceproteome	23.274	3	11	277570000	29	+	2.29973	-0.833454	0.00266667	20.964	21.413	21.4949	21.7672	21.9878	22.2773	22.2461	22.4618
Q2G1V7	Q2G1V7	SAOUHSC_00331		Completeproteome;Referenceproteome	7.6888	4	47.8	160590000	18		0.831833	-0.294056	0.0741871	21.3366	21.5602	21.2009	21.8434	21.8716	21.528	22.023	21.6947
Q2G1V8	Q2G1V8	SAOUHSC_02575		Completeproteome;Referenceproteome	16.052	2	10.7	415290000	46	+	1.28902	-0.518363	0.0239513	22.9733	22.464	22.446	22.4975	23.442	23.1525	23.2289	22.631
Q2G1W0	Q2G1W0	SAOUHSC_02574		Completeproteome;Oxidoreductase;Referenceproteome	40.742	36	75.8	16642000000	593	+	4.1178	-1.18704	0.000486275	24.4843	24.9184	24.5561	24.9002	25.7828	25.9524	26.0166	25.8554
Q2G1W1	Q2G1W1	SAOUHSC_02576		Completeproteome;Referenceproteome	17.399	1	9	66788000	8		0.138259	0.241481	0.550708	20.9584	19.272	21.6635	19.5547	20.8576	20.4944	19.4042	19.7265
Q2G1W2	Q2G1W2	pckA	Phosphoenolpyruvate carboxykinase [ATP]	ATP-binding;Completeproteome;Cytoplasm;Decarboxylase;Gluconeogenesis;Lyase;Manganese;Metal-binding;Nucleotide-binding;Referenceproteome	59.377	43	74.7	18668000000	748	+	5.38945	-1.61778	0	24.6534	24.7211	24.6282	24.9767	26.1825	26.3891	26.4872	26.3918
Q2G1W4	Q2G1W4	metK	S-adenosylmethionine synthase	ATP-binding;Cobalt;Completeproteome;Cytoplasm;Magnesium;Metal-binding;Nucleotide-binding;One-carbonmetabolism;Potassium;Referenceproteome;Transferase	43.641	20	45.8	37461000000	377	+	3.79095	-0.577087	0.000391167	28.5952	28.69	28.7283	28.7691	29.1183	29.2469	29.3718	29.3539
Q2G1W5	Q2G1W5	SAOUHSC_01908		Completeproteome;Referenceproteome	35.053	29	84.1	21611000000	403	+	3.51329	0.3934	0.000486486	27.7401	27.814	27.7234	27.7985	27.3674	27.3449	27.2808	27.5093
Q2G1X0	Q2G1X0	hly	Alpha-hemolysin	3D-structure;Completeproteome;Cytolysis;Hemolysis;Referenceproteome;Secreted;Signal;Toxin	35.973	36	84	12415000000	241	+	2.64277	-4.17392	0.00152218	24.9729	22.9113	22.7929	22.0514	28.9429	26.9378	26.649	26.8946
Q2G1X1	Q2G1X1	SAOUHSC_01120		Completeproteome;Referenceproteome	8.8988	3	70.1	2332400000	88	+	1.19195	0.369561	0.0302062	25.727	25.7641	25.6971	25.8005	25.802	25.278	25.404	25.0266
Q2G1X3	Q2G1X3	SAOUHSC_01119		Completeproteome;Referenceproteome	7.1095	2	18	476630000	41	+	1.68528	-0.464804	0.0100419	22.2161	22.0845	22.3819	22.3655	22.5776	22.8473	22.4489	23.0334
Q2G1X5	Q2G1X5	SAOUHSC_00720	6-carboxy-5.6.7.8-tetrahydropterin synthase	Completeproteome;Lyase;Metal-binding;Queuosinebiosynthesis;Referenceproteome;Zinc	16.011	5	54.7	1417600000	82		0.792302	-0.30961	0.0807102	23.1088	23.7479	23.8721	23.4581	23.6836	23.8809	24.1086	23.7523
Q2G1X6	Q2G1X6	queC	7-cyano-7-deazaguanine synthase	ATP-binding;Completeproteome;Ligase;Metal-binding;Nucleotide-binding;Queuosinebiosynthesis;Referenceproteome;Zinc	24.887	6	23.9	503640000	39	+	2.88005	-0.494156	0.000790698	22.0503	22.0531	21.9401	21.9083	22.6324	22.6006	22.3142	22.3812
Q2G1X7	Q2G1X7	queE	7-carboxy-7-deazaguanine synthase	4Fe-4S;Completeproteome;Iron;Iron-sulfur;Lyase;Metal-binding;Queuosinebiosynthesis;Referenceproteome;S-adenosyl-L-methionine	26.82	6	34.2	718820000	32		0.534657	0.177246	0.159752	22.8647	23.022	22.8186	23.2359	23.0094	22.4856	22.7585	22.9787
Q2G1Y0	Q2G1Y0	ligA	DNA ligase	Completeproteome;DNAdamage;DNArepair;DNAreplication;Ligase;Magnesium;Manganese;Metal-binding;NAD;Referenceproteome;Zinc	75.08	53	65.1	11905000000	637	+	5.88598	0.91182	0	25.5549	25.701	25.6234	25.7212	24.6747	24.7063	24.7918	24.7805
Q2G1Y1	Q2G1Y1	SAOUHSC_02125		Completeproteome;Referenceproteome	11.519	6	54	7429300000	190	+	4.67355	0.915856	0	26.6752	26.6623	26.9714	26.7137	25.8214	25.7852	25.9036	25.849
Q2G1Y5	Q2G1Y5	ldh2	L-lactate dehydrogenase 2	Completeproteome;Cytoplasm;NAD;Oxidoreductase;Phosphoprotein;Referenceproteome;Stressresponse	34.42	35	76.8	161240000000	897	+	3.68617	-0.637636	0.000372372	29.253	29.4736	29.3865	29.2706	30.1621	29.9552	29.8951	29.9218
Q2G1Y6	Q2G1Y6	SAOUHSC_01058		Completeproteome;GTP-binding;Nucleotide-binding;Referenceproteome	69.195	64	78.2	84172000000	1335	+	4.35503	0.466275	0.000325359	27.7641	27.6912	27.8612	27.7277	27.2746	27.2459	27.3647	27.2939
Q2G1Y7	Q2G1Y7	SAOUHSC_01061		Completeproteome;Referenceproteome	18.581	13	88.8	3950100000	243	+	2.33588	0.408226	0.00256886	24.4584	24.4814	24.2618	24.1251	23.9161	24.0277	23.9076	23.8425
Q2G1Z0	Q2G1Z0	SAOUHSC_00655		Completeproteome;Referenceproteome	35.018	11	29.5	2067200000	171	+	5.89223	-1.91966	0	22.4256	22.5792	22.3602	22.7153	24.3136	24.461	24.5963	24.388
Q2G1Z3	Q2G1Z3	SAOUHSC_00652		ATP-binding;Completeproteome;Nucleotide-binding;Referenceproteome	29.496	15	58.9	3088400000	182	+	6.13833	0.912966	0	24.5906	24.7268	24.6759	24.6909	23.7442	23.7441	23.6959	23.8481
Q2G1Z4	Q2G1Z4	proS	Proline--tRNA ligase	Aminoacyl-tRNAsynthetase;ATP-binding;Completeproteome;Cytoplasm;Ligase;Nucleotide-binding;Proteinbiosynthesis;Referenceproteome	63.862	57	89.4	35171000000	1099	+	3.32551	-0.467618	0.000578431	25.8027	25.975	26.0309	26.0865	26.4189	26.3882	26.4327	26.5258
Q2G1Z5	Q2G1Z5	SAOUHSC_01239	Zinc metalloprotease	Cellmembrane;Completeproteome;Hydrolase;Membrane;Metal-binding;Metalloprotease;Protease;Referenceproteome;Transmembrane;Transmembranehelix;Zinc	44.279	14	27.4	6048300000	164	+	1.28108	-0.439122	0.02417	24.5308	24.9281	25.1628	25.231	25.1745	25.3451	25.5154	25.5743
Q2G1Z7	Q2G1Z7	SAOUHSC_01237	Isoprenyl transferase	Completeproteome;Magnesium;Metal-binding;Referenceproteome;Transferase	29.848	18	64.5	2930900000	194		0.741726	0.143212	0.0921738	24.2471	24.4941	24.5057	24.6065	24.2805	24.487	24.2475	24.2657
Q2G1Z8	Q2G1Z8	polC	DNA polymerase III PolC-type	Completeproteome;Cytoplasm;DNA-directedDNApolymerase;DNAreplication;Exonuclease;Hydrolase;Nuclease;Nucleotidyltransferase;Referenceproteome;Transferase	162.46	47	40.7	7050200000	481	+	4.74216	0.398563	0	24.2202	24.3311	24.2528	24.2526	23.8119	23.8453	23.9021	23.9032
Q2G1Z9	Q2G1Z9	nadK	NAD kinase	ATP-binding;Completeproteome;Cytoplasm;Kinase;NAD;NADP;Nucleotide-binding;Referenceproteome;Transferase	30.769	19	63.9	6210100000	310	+	2.80612	0.609705	0.00114393	24.9135	25.2498	25.0899	25.1282	24.2373	24.5818	24.4957	24.6278
Q2G200	Q2G200	SAOUHSC_00941	UPF0738 protein SAOUHSC_00941	Completeproteome;Referenceproteome	13.529	3	28.7	1040100000	34	+	1.19113	0.387952	0.0302779	23.8895	24.1536	24.3791	23.655	23.6494	23.7583	23.6794	23.4383
Q2G201	Q2G201	SAOUHSC_00940		Completeproteome;Referenceproteome	23.391	12	53.3	1324000000	166		0.819414	-0.0845399	0.0761083	22.88	23.0818	22.9665	22.887	23.0396	23.0322	23.0922	22.9894
Q2G202	Q2G202	SAOUHSC_00939		Completeproteome;Referenceproteome	12.467	5	61	284800000	26		0.931797	-1.12638	0.0581912	22.6585	20.369	21.8539	20.0633	22.3592	22.4083	22.2653	22.4174
Q2G203	Q2G203	SAOUHSC_00938	UPF0413 protein SAOUHSC_00938	Completeproteome;Referenceproteome	31.363	5	17.2	159940000	21	+	2.28761	-2.02037	0.00265497	19.7738	21.3423	21.5263	21.1291	22.6304	22.5306	23.6383	23.0536
Q2G204	Q2G204	SAOUHSC_00942		Completeproteome;Kinase;Referenceproteome;Transferase	25.239	13	64.9	3485200000	191	+	5.22639	0.624653	0	25.0302	25.0086	24.9038	24.9568	24.3742	24.2983	24.3006	24.4278
Q2G205	Q2G205	SAOUHSC_02808		Completeproteome;Kinase;Referenceproteome;Transferase	58.094	13	29.6	2106400000	163	+	1.73332	-0.243236	0.00891061	24.2774	24.3034	24.511	24.5132	24.5603	24.5907	24.7054	24.7215
Q2G208	Q2G208	SAOUHSC_02809		Completeproteome;DNA-binding;Referenceproteome;Transcription;Transcriptionregulation	26.595	8	49.6	671400000	66	+	1.69004	-0.336266	0.0100304	22.2233	22.2875	22.2372	22.6421	22.7798	22.5768	22.6823	22.6962
Q2G210	Q2G210	mnhE2	Putative antiporter subunit mnhE2	Antiport;Cellmembrane;Completeproteome;Iontransport;Membrane;Referenceproteome;Transmembrane;Transmembranehelix;Transport	18.851	1	8.8	22482000	4	+	1.25435	1.26149	0.0258983	19.5392	20.7269	21.7611	20.7166	19.0387	19.8798	19.925	18.8542
Q2G217	Q2G217	SAOUHSC_00211		Completeproteome;Referenceproteome	33.794	3	13.5	710110000	30		0.710605	0.921383	0.0993513	23.7275	24.0836	23.4481	23.9185	24.0777	23.6807	21.4027	22.3312
Q2G218	Q2G218	ldh1	L-lactate dehydrogenase 1	Completeproteome;Cytoplasm;NAD;Oxidoreductase;Phosphoprotein;Referenceproteome;Stressresponse	34.583	37	80.4	338780000000	1233	+	1.12031	-0.209196	0.0358341	29.8706	29.8645	30.093	30.2235	30.1187	30.1979	30.2555	30.3164
Q2G219	Q2G219	SAOUHSC_00209		Cellmembrane;Completeproteome;Kinase;Membrane;Phosphotransferasesystem;Referenceproteome;Sugartransport;Transferase;Transmembrane;Transmembranehelix;Transport	54.933	1	3.9	92458000	27	+	4.19614	1.14959	0.000285714	21.784	22.0299	21.6276	21.5875	20.6211	20.455	20.6061	20.7483
Q2G220	Q2G220	SAOUHSC_02980		Completeproteome;Referenceproteome	20.729	18	69.4	7371000000	278	+	2.35586	0.490062	0.00259607	25.4265	25.8711	25.7759	25.7691	25.1111	25.2222	25.1889	25.3601
Q2G221	Q2G221	SAOUHSC_02978		Completeproteome;Referenceproteome	108.71	55	52.3	8946100000	535	+	1.9485	0.212963	0.00585052	25.0455	25.2503	25.201	25.2952	24.9689	24.9349	25.0446	24.9917
Q2G222	Q2G222	SAOUHSC_02979	N-acetylmuramoyl-L-alanine amidase domain-containing protein SAOUHSC_02979	Completeproteome;Hydrolase;Referenceproteome;Secreted;Signal	69.252	25	53.2	4765500000	280	+	3.20056	0.604059	0.000668192	24.9036	25.0576	24.9649	25.2886	24.5065	24.5259	24.3816	24.3844
Q2G223	Q2G223	SAOUHSC_02976		Completeproteome;Isomerase;Referenceproteome	35.395	5	13.8	1578700000	62		0.6409	0.381335	0.119383	24.609	24.8167	25.3659	24.4747	24.9892	24.4191	24.336	23.9966
Q2G224	Q2G224	deoC	Deoxyribose-phosphate aldolase	Completeproteome;Cytoplasm;Lyase;Referenceproteome;Schiffbase	23.472	7	79.1	5588200000	181	+	2.46858	0.547163	0.00202548	25.5242	25.9898	25.9974	25.7406	25.2597	25.3371	25.1946	25.2721
Q2G227	Q2G227	deoB	Phosphopentomutase	Completeproteome;Cytoplasm;Isomerase;Manganese;Metal-binding;Referenceproteome	43.795	28	76.5	49480000000	635	+	5.08627	0.703898	0	28.9843	29.0273	29.1901	29.1496	28.3569	28.4032	28.4026	28.3729
Q2G228	Q2G228	deoD	Purine nucleoside phosphorylase DeoD-type	Completeproteome;Glycosyltransferase;Referenceproteome;Transferase	25.991	11	47.2	6081900000	221	+	3.1093	0.492032	0.000643172	26.2822	26.4101	26.4722	26.5879	25.811	25.9952	25.9633	26.0147
Q2G229	Q2G229	SAOUHSC_00452		Completeproteome;Referenceproteome	11.838	7	34.9	6193200000	217	+	4.24796	0.614714	0.000295652	26.2613	26.0647	26.2172	26.1536	25.5981	25.5378	25.4486	25.6535
Q2G230	Q2G230	tmk	Thymidylate kinase	ATP-binding;Completeproteome;Kinase;Nucleotide-binding;Nucleotidebiosynthesis;Referenceproteome;Transferase	23.424	14	67.3	3419000000	185	+	4.02471	0.547122	0.000452555	24.9454	24.9288	24.8571	25.0134	24.5273	24.3483	24.2913	24.3894
Q2G233	Q2G233	SAOUHSC_02135		Completeproteome;Referenceproteome	29.473	3	21.2	309160000	32		0.149253	0.0507731	0.529145	22.6692	22.4025	22.6898	22.5622	22.5906	22.4641	22.7997	22.2663
Q2G234	Q2G234	SAOUHSC_02134	Nitric oxide synthase oxygenase	Completeproteome;Heme;Iron;Metal-binding;Oxidoreductase;Referenceproteome	41.71	20	64.2	1545300000	114		0.889158	0.272731	0.0649686	22.8249	23.2476	23.0656	23.2483	23.0145	22.7747	22.5091	22.9971
Q2G235	Q2G235	SAOUHSC_02133	Nicotinate phosphoribosyltransferase	Completeproteome;Glycosyltransferase;Ligase;Pyridinenucleotidebiosynthesis;Referenceproteome;Transferase	54.796	51	77.5	19315000000	756	+	1.95879	0.279933	0.00587322	25.8799	26.0905	26.0004	26.1927	25.6584	25.7651	25.7713	25.8489
Q2G236	Q2G236	nadE	NH(3)-dependent NAD(+) synthetase	ATP-binding;Completeproteome;Ligase;NAD;Nucleotide-binding;Referenceproteome	30.696	29	72.9	12529000000	440	+	3.35829	0.30523	0.00059	25.3064	25.3229	25.3853	25.3516	25.1524	25.0178	25.0089	24.9661
Q2G238	Q2G238	SAOUHSC_00707	Tagatose-6-phosphate kinase	ATP-binding;Completeproteome;Kinase;Lactosemetabolism;Nucleotide-binding;Referenceproteome;Transferase	32.572	11	56.2	1217800000	105	+	1.93994	-0.449582	0.00604878	23.2565	23.0771	23.1335	23.3663	23.9337	23.722	23.4843	23.4917
Q2G239	Q2G239	SAOUHSC_00708		Cellmembrane;Completeproteome;Membrane;Phosphotransferasesystem;Referenceproteome;Sugartransport;Transferase;Transmembrane;Transmembranehelix;Transport	68.713	18	30.2	2949900000	170	+	4.26233	-0.714699	0.000299559	23.3418	23.5	23.4485	23.5417	24.2952	24.2404	24.081	24.0741
Q2G240	Q2G240	SAOUHSC_00706		Completeproteome;DNA-binding;Referenceproteome;Transcription;Transcriptionregulation	28.473	5	19.3	215310000	16		0.0549339	-0.0496168	0.773477	22.1916	23.1175	22.4412	22.0512	22.2186	22.2321	22.4271	23.122
Q2G241	Q2G241	gltX	Glutamate--tRNA ligase	Aminoacyl-tRNAsynthetase;ATP-binding;Completeproteome;Cytoplasm;Ligase;Nucleotide-binding;Proteinbiosynthesis;Referenceproteome	56.288	57	84.3	57863000000	1119	+	4.71933	0.33883	0	27.7426	27.6463	27.7052	27.7698	27.3948	27.3645	27.387	27.3624
Q2G242	Q2G242	SAOUHSC_00508		Completeproteome;Referenceproteome	38.887	14	45	2147900000	136		0.357738	-0.0688796	0.266665	24.015	23.9388	23.929	24.2593	24.0132	24.1176	24.1356	24.151
Q2G243	Q2G243	SAOUHSC_00507	DNA repair protein radA	ATP-binding;Completeproteome;DNA-binding;DNAdamage;DNArepair;Metal-binding;Nucleotide-binding;Referenceproteome;Zinc;Zinc-finger	48.684	20	52.3	3489500000	174		0.72435	0.134096	0.0959445	24.4525	24.2512	24.2623	24.3625	24.0529	24.3382	24.3241	24.0768
Q2G245	Q2G245	SAOUHSC_01854		Completeproteome;Referenceproteome	55.09	31	68.3	4877600000	434	+	2.31928	-0.217824	0.00261721	24.2111	24.1752	24.1575	24.2596	24.5188	24.4692	24.3403	24.3464
Q2G247	Q2G247	SAOUHSC_01855	UPF0478 protein SAOUHSC_01855	Cellmembrane;Completeproteome;Membrane;Referenceproteome;Transmembrane;Transmembranehelix	18.002	23	79.1	45477000000	620	+	1.564	-0.352608	0.0132035	27.2134	27.5885	27.5738	27.6429	27.959	27.9977	27.704	27.7684
Q2G248	Q2G248	SAOUHSC_01852		Completeproteome;Referenceproteome;Transferase	40.618	28	71.1	11644000000	324	+	6.66287	-1.05412	0	25.1264	25.1656	25.2387	25.2045	26.2134	26.1944	26.3351	26.2088
Q2G252	Q2G252	rlmH	Ribosomal RNA large subunit methyltransferase H	Completeproteome;Cytoplasm;Methyltransferase;Referenceproteome;rRNAprocessing;S-adenosyl-L-methionine;Transferase	18.306	15	74.8	4727900000	178	+	2.14453	0.773506	0.00383821	24.8169	25.3893	25.5357	25.6498	24.5625	24.5029	24.4909	24.7414
Q2G253	Q2G253	SAOUHSC_00025		Completeproteome;Referenceproteome	83.424	11	25.8	553100000	18		0.985281	0.222768	0.0503756	23.5339	23.179	23.0142	23.2784	23.1317	23.035	22.9345	23.0132
Q2G254	Q2G254	SAOUHSC_01476		Completeproteome;Referenceproteome	12.195	10	47.6	1076900000	97	+	2.58296	-0.616109	0.00159734	22.694	22.6652	22.9261	22.6386	23.3898	23.5973	23.3174	23.0838
Q2G255	Q2G255	SAOUHSC_01475		Completeproteome;Referenceproteome	42.795	16	35.8	1381300000	155	+	1.6915	-0.350828	0.0100023	22.7491	22.6479	23.132	22.9492	23.1664	23.1683	23.2536	23.2931
Q2G256	Q2G256	SAOUHSC_01474		ATP-binding;Completeproteome;Nucleotide-binding;Nucleotidyltransferase;Referenceproteome;RNA-binding;Transferase	42.514	6	23.8	517650000	54	+	2.2172	-0.649522	0.00333523	21.471	21.8817	21.7658	22.1421	22.4144	22.4061	22.6788	22.3594
Q2G257	Q2G257	SAOUHSC_01477		Completeproteome;Referenceproteome	24.581	10	54.9	7880100000	328		0.185479	0.0838876	0.463362	24.6405	25.118	25.1546	25.4398	24.9092	24.9127	25.1752	25.0203
Q2G258	Q2G258	birA	Bifunctional ligase/repressor BirA	ATP-binding;Biotin;Completeproteome;DNA-binding;Ligase;Nucleotide-binding;Referenceproteome;Repressor;Transcription;Transcriptionregulation	37.071	10	45.2	2605600000	136		0.749449	-0.227108	0.0901084	23.1096	23.7811	23.5298	23.658	23.7631	23.666	23.8062	23.7515
Q2G260	Q2G260	SAOUHSC_00094	Uncharacterized protein SAOUHSC_00094	Completeproteome;Referenceproteome;Secreted;Signal	21.847	5	39.7	99082000	33	+	2.93785	-1.56803	0.000694611	20.3626	19.6268	19.9923	20.1067	21.5483	22.2272	21.2127	21.3724
Q2G261	Q2G261	sodM	Superoxide dismutase [Mn/Fe] 2	Completeproteome;Iron;Manganese;Metal-binding;Oxidoreductase;Referenceproteome;Stressresponse	23.041	11	75.9	25065000000	143		0.440828	-0.131172	0.209782	28.4567	28.6663	28.3059	28.1668	28.7112	28.3619	28.44	28.6074
Q2G263	Q2G263	SAOUHSC_00096		Completeproteome;DNA-binding;Referenceproteome;Transcription;Transcriptionregulation	29.171	5	29.1	406450000	34		0.0614203	-0.0163722	0.751931	22.4317	22.3371	22.2566	22.0559	22.3248	22.2347	22.408	22.1792
Q2G264	Q2G264	SAOUHSC_01180		Completeproteome;Referenceproteome	35.907	15	65.3	3517100000	206	+	2.76775	-0.709047	0.001125	24.1037	24.5818	24.6158	24.4746	24.9944	25.2582	25.1243	25.2352
Q2G265	Q2G265	def	Peptide deformylase	Completeproteome;Hydrolase;Metal-binding;Proteinbiosynthesis;Referenceproteome	18.102	12	70.4	2038300000	136	+	5.36674	0.743046	0	24.3251	24.3978	24.3033	24.2065	23.5814	23.5893	23.4871	23.6026
Q2G266	Q2G266	priA	Primosomal protein N'	ATP-binding;Completeproteome;DNA-binding;DNAreplication;Helicase;Hydrolase;Metal-binding;Nucleotide-binding;Primosome;Referenceproteome;Zinc;Zinc-finger	92.521	21	35.5	2104900000	136		0.42142	0.159667	0.2223	23.889	23.9039	24.1857	23.8867	24.2193	23.4908	23.7504	23.7661
Q2G268	Q2G268	SAOUHSC_01178		Completeproteome;Ligase;Referenceproteome	44.14	31	69.7	10701000000	369	+	2.21953	0.288154	0.00333997	25.2399	25.453	25.4053	25.561	25.11	25.184	25.1022	25.1104
Q2G270	Q2G270	SAOUHSC_02568		Completeproteome;Referenceproteome	12.534	8	73.1	8743400000	165	+	3.32273	0.429086	0.00057561	26.3502	26.4425	26.4378	26.2911	25.8593	26.0873	25.9686	25.8899
Q2G273	Q2G273	ureG	Urease accessory protein UreG	Chaperone;Completeproteome;Cytoplasm;GTP-binding;Nickelinsertion;Nucleotide-binding;Referenceproteome	22.344	4	40.2	474580000	46	+	3.98765	0.683066	0.00043662	22.283	22.3106	22.3566	22.2999	21.6477	21.8317	21.5246	21.5139
Q2G274	Q2G274	gyrB	DNA gyrase subunit B	ATP-binding;Completeproteome;Cytoplasm;DNA-binding;Isomerase;Magnesium;Metal-binding;Nucleotide-binding;Referenceproteome;Topoisomerase	72.539	57	64.1	38640000000	775	+	6.36426	1.4314	0	27.8143	27.8037	27.9372	27.9426	26.2963	26.4816	26.5008	26.4936
Q2G275	Q2G275	recF	DNA replication and repair protein RecF	ATP-binding;Completeproteome;Cytoplasm;DNA-binding;DNAdamage;DNArepair;DNAreplication;Nucleotide-binding;Referenceproteome;SOSresponse	42.415	16	55.9	1949100000	168	+	6.15474	1.72868	0	24.2554	24.1397	24.4464	24.247	22.4088	22.5434	22.65	22.5715
Q2G276	Q2G276	SAOUHSC_00003		Completeproteome;Referenceproteome	9.1373	7	71.6	5057000000	97	+	3.7642	2.71572	0.000386293	27.0057	27.443	27.2701	26.8463	23.8846	23.9553	25.1098	24.7525
Q2G277	Q2G277	SAOUHSC_00774		Completeproteome;Referenceproteome	25.704	8	31.9	713350000	47	+	2.4127	-0.885513	0.0023839	22.3819	22.8188	23.1091	23.1468	23.7301	23.5308	23.9014	23.8362
Q2G278	Q2G278	SAOUHSC_00773		Completeproteome;Referenceproteome	30.283	2	12.5	110360000	3	+	2.43103	-1.24184	0.00207547	19.9971	20.6396	20.2806	21.2353	21.6563	21.8289	21.825	21.8097
Q2G280	Q2G280	SAOUHSC_01999		Completeproteome;Referenceproteome	17.26	17	64.2	10194000000	244	+	1.81996	0.247974	0.00777778	25.958	26.0202	26.282	26.0863	25.8995	25.8222	25.7933	25.8396
Q2G281	Q2G281	SAOUHSC_01998		Completeproteome;Referenceproteome	35.953	15	42.7	2127300000	185		0.919663	0.226494	0.0598525	23.7708	24.1784	24.0556	24.1625	23.6271	23.7634	23.8513	24.0195
Q2G282	Q2G282	perR	Peroxide-responsive repressor PerR	Completeproteome;Cytoplasm;DNA-binding;Manganese;Metal-binding;Referenceproteome;Repressor;Transcription;Transcriptionregulation;Zinc	17.183	7	71.6	5319500000	133	+	1.93231	-0.277841	0.00622279	25.3849	25.5436	25.5555	25.3177	25.8688	25.6682	25.6424	25.7336
Q2G283	Q2G283	hemL2	Glutamate-1-semialdehyde 2.1-aminomutase 2	Completeproteome;Cytoplasm;Isomerase;Porphyrinbiosynthesis;Pyridoxalphosphate;Referenceproteome	46.755	27	58	22660000000	527		0.699395	0.0622878	0.102771	26.6897	26.8339	26.7493	26.8591	26.6832	26.7394	26.6963	26.7638
Q2G285	Q2G285	SAOUHSC_02692		Completeproteome;Referenceproteome	9.4335	3	24.1	376230000	29		0.866719	0.182881	0.0680585	22.8602	22.8751	23.0538	23.0821	22.5493	22.8038	22.8054	22.9811
Q2G286	Q2G286	SAOUHSC_02691		Completeproteome;Referenceproteome	10.438	1	8	102820000	6		0.384233	-0.374825	0.245781	20.282	21.8789	21.9792	22.0635	21.9983	21.9147	21.8362	21.9537
Q2G294	Q2G294	SAOUHSC_01846		Completeproteome;Referenceproteome	64.364	24	44.2	1444300000	163	+	4.64821	-3.70295	0	20.1685	19.1224	20.2948	19.4998	23.0577	23.4922	23.6318	23.7157
Q2G295	Q2G295	SAOUHSC_01850		Completeproteome;DNA-binding;Referenceproteome;Transcription;Transcriptionregulation	36.06	29	75.1	45579000000	545	+	1.96908	-0.316218	0.00575875	28.4481	28.7346	28.6814	28.6623	29.0632	29.0375	28.839	28.8516
Q2G296	Q2G296	fhs	Formate--tetrahydrofolate ligase	ATP-binding;Completeproteome;Ligase;Nucleotide-binding;One-carbonmetabolism;Referenceproteome	59.856	53	72.6	86650000000	1138	+	5.63399	-1.0564	0	26.7217	26.9387	26.7031	26.7279	27.7834	27.8023	27.896	27.8351
Q2G297	Q2G297	SAOUHSC_01696		Completeproteome;Referenceproteome	22.463	5	21.6	1160500000	65		0.0158096	-0.00469303	0.929304	23.3738	23.5921	23.4491	23.459	23.2484	23.5138	23.682	23.4487
Q2G298	Q2G298	rsfS	Ribosomal silencing factor RsfS	Completeproteome;Cytoplasm;Referenceproteome;Repressor;Translationregulation	13.482	14	83.8	6529400000	271	+	1.73229	-0.290265	0.0089	24.8094	24.9389	24.9602	24.6603	25.2333	25.1413	24.9662	25.189
Q2G2A0	Q2G2A0	SAOUHSC_01694		Completeproteome;Referenceproteome	27.702	4	23.9	107410000	16		0.63517	-1.00356	0.121566	19.8861	20.1894	20.0132	21.4715	22.1197	22.5726	21.3039	19.5784
Q2G2A1	Q2G2A1	SAOUHSC_01692		Completeproteome;Metal-binding;Referenceproteome;Zinc	15.763	7	39.9	1409800000	99	+	2.07664	-0.537241	0.00436364	22.5639	22.6083	22.5689	22.8665	23.3507	23.2738	22.8352	23.2968
Q2G2A2	Q2G2A2	SAOUHSC_01044	UPF0223 protein SAOUHSC_01044	Completeproteome;Referenceproteome	10.692	5	56	368970000	25	+	1.37419	-0.531284	0.0199049	22.4381	21.8907	21.6723	21.7324	22.7487	22.3123	22.2674	22.5302
Q2G2A3	Q2G2A3	SAOUHSC_01043	Dihydrolipoyl dehydrogenase	Completeproteome;FAD;Flavoprotein;NAD;Oxidoreductase;Redox-activecenter;Referenceproteome	49.481	54	69.9	319140000000	1646	+	1.43068	0.139291	0.0174584	30.2651	30.421	30.1899	30.349	30.1817	30.186	30.1756	30.1245
Q2G2A4	Q2G2A4	SAOUHSC_01042		Acyltransferase;Completeproteome;Lipoyl;Pyruvate;Referenceproteome;Transferase	46.354	53	78.1	173140000000	1155	+	4.23761	0.273535	0.000294372	30.2821	30.3004	30.2934	30.3158	29.9897	29.9863	30.0215	30.1
Q2G2A5	Q2G2A5	SAOUHSC_01041		Completeproteome;Oxidoreductase;Pyruvate;Referenceproteome	35.246	45	84.6	317560000000	1542	+	2.99217	0.186074	0.000716049	30.2518	30.2595	30.2716	30.3125	30.041	30.1516	30.0393	30.1192
Q2G2A7	Q2G2A7	potA	Spermidine/putrescine import ATP-binding protein PotA	ATP-binding;Cellmembrane;Completeproteome;Hydrolase;Membrane;Nucleotide-binding;Referenceproteome;Transport	41.33	17	48.9	1912000000	128	+	3.56034	-0.518818	0.000501393	23.2404	23.1738	23.4002	23.2021	23.6866	23.9021	23.7349	23.7681
Q2G2A8	Q2G2A8	SAOUHSC_01049		Completeproteome;Referenceproteome	41.471	8	35.6	357820000	68	+	2.47505	-1.47244	0.0020352	21.7575	20.5506	21.7192	20.961	22.4902	22.8267	22.9525	22.6086
Q2G2B0	Q2G2B0	SAOUHSC_01047		Completeproteome;Membrane;Referenceproteome;Transmembrane;Transmembranehelix;Transport	30.15	2	8.7	115280000	26	+	2.63672	-1.6805	0.00151701	19.2131	20.0265	20.3069	20.7136	21.5769	21.5807	21.9641	21.8604
Q2G2B6	Q2G2B6	SAOUHSC_00215		Completeproteome;Phosphotransferasesystem;Referenceproteome;Transferase;Transport	10.179	1	22.8	133280000	8		0.331774	-0.128792	0.289313	21.9132	21.7139	21.1853	21.6232	21.8014	21.8309	21.5591	21.7595
Q2G2C1	Q2G2C1	SAOUHSC_01064	Pyruvate carboxylase	ATP-binding;Biotin;Completeproteome;Ligase;Metal-binding;Nucleotide-binding;Pyruvate;Referenceproteome	128.55	103	79.9	55908000000	1941	+	3.72419	-0.42909	0.000381538	26.8918	26.946	26.9623	27.1053	27.3283	27.4505	27.411	27.432
Q2G2C2	Q2G2C2	SAOUHSC_01063		Completeproteome;Membrane;Referenceproteome;Transmembrane;Transmembranehelix	44.882	1	8.1	299500000	15	+	1.1558	-1.84155	0.0326316	19.7849	20.8803	22.936	20.0686	23.3153	21.4533	23.0489	23.2185
Q2G2C4	Q2G2C4	SAOUHSC_00220	2-C-methyl-D-erythritol 4-phosphate cytidylyltransferase	Completeproteome;Isoprenebiosynthesis;Nucleotidyltransferase;Referenceproteome;Transferase	26.574	13	67.2	2090000000	153	+	2.62082	-0.366104	0.00149916	23.7077	23.936	23.8597	23.9721	24.3602	24.2051	24.2132	24.1613
Q2G2C9	Q2G2C9	SAOUHSC_01245		Completeproteome;Referenceproteome	11.537	10	86.7	1692600000	144		0.871671	-0.193874	0.0674069	22.8833	22.8505	22.8968	23.1993	23.0236	23.0258	23.3391	23.217
Q2G2D0	Q2G2D0	infB	Translation initiation factor IF-2	Completeproteome;Cytoplasm;GTP-binding;Initiationfactor;Nucleotide-binding;Proteinbiosynthesis;Referenceproteome	77.87	72	68.5	96611000000	1664	+	3.57571	-0.0764327	0.000502793	28.2415	28.2632	28.2651	28.2651	28.3143	28.3436	28.3307	28.352
Q2G2D1	Q2G2D1	SAOUHSC_01244		Completeproteome;Referenceproteome	11.04	10	70.2	7575500000	200		0.631806	-0.128864	0.122394	25.3249	25.7007	25.434	25.6291	25.5398	25.6238	25.6998	25.7407
Q2G2D2	Q2G2D2	nusA	Transcription termination/antitermination protein NusA	Completeproteome;Cytoplasm;Referenceproteome;RNA-binding;Transcription;Transcriptionantitermination;Transcriptionregulation;Transcriptiontermination	43.741	41	77	55019000000	840		0.332077	0.0368786	0.289076	28.1086	28.2042	28.3166	28.175	28.1202	28.203	28.1464	28.1874
Q2G2D3	Q2G2D3	rimP	Ribosome maturation factor RimP	Completeproteome;Cytoplasm;Referenceproteome;Ribosomebiogenesis	17.627	4	27.7	473610000	57		0.94086	-0.225675	0.0562128	22.4005	22.1125	21.9556	22.3463	22.5614	22.3978	22.2627	22.4958
Q2G2D4	Q2G2D4	SAOUHSC_02450		Cellmembrane;Completeproteome;Membrane;Phosphotransferasesystem;Referenceproteome;Sugartransport;Transferase;Transmembrane;Transmembranehelix;Transport	62.431	5	10.7	392940000	34		0.335292	0.220181	0.285399	22.9167	21.9919	22.6189	22.6495	22.587	22.2349	21.7953	22.6789
Q2G2D5	Q2G2D5	lacG	6-phospho-beta-galactosidase	Completeproteome;Glycosidase;Hydrolase;Referenceproteome	54.549	17	49.8	3694300000	225		0.0690622	0.0152483	0.72772	24.7359	24.652	24.8475	24.609	24.8055	24.6438	24.5553	24.7789
Q2G2D6	Q2G2D6	SAOUHSC_02448		Completeproteome;Referenceproteome	33.186	8	35	759280000	67	+	1.91378	0.556682	0.00623067	22.5399	22.6208	22.5854	22.5268	21.7395	21.8419	22.0195	22.4452
Q2G2D7	Q2G2D7	SAOUHSC_02447		Completeproteome;Referenceproteome	36.266	18	61	6626900000	296		0.381684	-0.0451746	0.247655	25.1045	24.9125	25.0689	25.0686	25.0319	25.0664	25.0707	25.166
Q2G2D8	Q2G2D8	SAOUHSC_00634		Completeproteome;Referenceproteome;Transport	35.071	32	78.8	43076000000	790	+	3.79126	-0.504677	0.000392405	27.0633	27.1725	27.2559	27.2364	27.8069	27.6209	27.683	27.636
Q2G2E0	Q2G2E0	SAOUHSC_00633		Completeproteome;Membrane;Referenceproteome;Transmembrane;Transport	74.934	13	21.9	1176600000	143	+	2.93	0.381122	0.000691849	22.8997	22.9892	22.9951	23.1232	22.6604	22.479	22.6729	22.6704
Q2G2E2	Q2G2E2	SAOUHSC_00651		Completeproteome;Referenceproteome	29.917	4	17.3	945260000	67		0.636161	-0.216691	0.121457	22.7936	23.2978	22.8854	23.3556	23.1895	23.3396	23.1647	23.5053
Q2G2E4	Q2G2E4	SAOUHSC_00648		Completeproteome;Referenceproteome	45.015	2	9.8	77374000	7		0.0461552	-0.0875306	0.805225	20.0469	22.8595	22.062	21.0042	21.62	22.2701	21.2103	21.2224
Q2G2E5	Q2G2E5	SAOUHSC_00647		ATP-binding;Completeproteome;Nucleotide-binding;Referenceproteome	64.05	30	48.9	16220000000	508	+	1.5176	-0.140933	0.0146422	26.4974	26.6619	26.5534	26.6869	26.7816	26.7752	26.6925	26.7141
Q2G2E9	Q2G2E9	SAOUHSC_00030		Completeproteome;Referenceproteome	67.78	12	26	2958000000	233	+	1.78973	0.448083	0.00806326	24.3886	24.6186	24.8007	24.8142	23.9405	24.2417	24.3526	24.2951
Q2G2F0	Q2G2F0	SAOUHSC_01968		Completeproteome;Referenceproteome	15.945	16	94.3	7577000000	242		0.663063	-0.15424	0.112159	25.7703	25.8102	26.0366	25.4955	25.9311	25.8939	25.9621	25.9425
Q2G2F1	Q2G2F1	SAOUHSC_01967		ATP-binding;Completeproteome;Nucleotide-binding;Referenceproteome	27.717	8	42.3	2939400000	91		0.859325	0.181944	0.0694524	24.576	24.6351	24.4209	24.584	24.2448	24.1797	24.4767	24.5869
Q2G2F2	Q2G2F2	SAOUHSC_01966		Completeproteome;Referenceproteome	48.441	8	12.3	647580000	74		0.518655	-0.137662	0.165278	22.5283	22.4711	22.4284	22.5754	22.7909	22.8326	22.3139	22.6164
Q2G2F3	Q2G2F3	traP	Signal transduction protein TRAP	3D-structure;Completeproteome;Membrane;Phosphoprotein;Referenceproteome;Virulence	19.547	14	53.3	6478400000	227	+	2.3654	-0.874537	0.00261187	24.4464	24.4209	24.1993	24.3662	25.5722	25.5167	25.0544	24.7878
Q2G2F5	Q2G2F5	SAOUHSC_02352		Completeproteome;Isomerase;Referenceproteome	42.412	25	69.6	6663400000	472	+	5.63422	0.89913	0	24.6695	24.7006	24.737	24.8855	23.8433	23.8308	23.8162	23.9057
Q2G2F6	Q2G2F6	atpE	ATP synthase subunit c	ATPsynthesis;Cellmembrane;CF(0);Completeproteome;Hydrogeniontransport;Iontransport;Lipid-binding;Membrane;Referenceproteome;Transmembrane;Transmembranehelix;Transport	6.9793	1	17.1	2780600000	17		0.523416	-1.28481	0.163885	21.3151	25.8348	25.772	25.6154	26.5394	25.628	26.0139	25.4952
Q2G2F8	Q2G2F8	atpF	ATP synthase subunit b	ATPsynthesis;Cellmembrane;CF(0);Completeproteome;Hydrogeniontransport;Iontransport;Membrane;Referenceproteome;Transmembrane;Transmembranehelix;Transport	19.539	20	77.5	60679000000	549	+	1.07659	-0.101157	0.0406134	28.3875	28.3246	28.2515	28.424	28.4948	28.5023	28.4223	28.3728
Q2G2G0	Q2G2G0	SAOUHSC_00717		Completeproteome;Referenceproteome	16.045	18	53.4	18630000000	356	+	4.47251	-1.28835	0	25.8232	25.5468	25.4275	25.645	27.0284	27.0531	26.7494	26.7648
Q2G2G1	Q2G2G1	SAOUHSC_00716		Completeproteome;Referenceproteome	17.665	2	7.6	150770000	21	+	4.34198	-1.07841	0.000317757	21.2197	21.1069	21.1286	21.1968	22.146	22.5408	22.145	22.1339
Q2G2G2	Q2G2G2	saeR	Response regulator SaeR	Activator;Completeproteome;Cytoplasm;DNA-binding;Phosphoprotein;Referenceproteome;Sensorytransduction;Transcription;Transcriptionregulation;Two-componentregulatorysystem;Virulence	26.857	8	39.5	4152300000	149		0.250144	-0.114123	0.374457	24.8224	24.9265	25.2471	25.2302	24.9117	24.9041	25.4108	25.456
Q2G2G4	Q2G2G4	SAOUHSC_01055		Completeproteome;Referenceproteome	30.471	12	51.6	9705500000	292	+	2.40737	0.457553	0.00237654	25.6259	25.8998	25.8169	25.8101	25.1294	25.264	25.4831	25.4461
Q2G2G5	Q2G2G5	SAOUHSC_01051		Completeproteome;Referenceproteome	15.577	2	11.5	3635100000	27	+	2.41676	-1.62673	0.00239875	24.4322	24.5902	24.9571	24.404	27.0956	25.8975	25.5538	26.3435
Q2G2G6	Q2G2G6	SAOUHSC_01050		Completeproteome;Referenceproteome	40.059	12	29.8	2628900000	189	+	1.16969	0.21545	0.0317923	24.8565	24.8504	24.8597	24.7358	24.6953	24.3508	24.7746	24.6198
Q2G2G7	Q2G2G7	SAOUHSC_01054	UPF0637 protein SAOUHSC_01054	Completeproteome;Referenceproteome	24.019	12	56.9	10267000000	194		0.441742	0.0678701	0.209436	26.4715	26.7698	26.6706	26.5391	26.4974	26.5742	26.5593	26.5486
Q2G2G9	Q2G2G9	recX	Regulatory protein RecX	Completeproteome;Cytoplasm;Referenceproteome	32.241	9	34.2	1039600000	87	+	2.21573	0.485562	0.00332578	23.493	23.4142	23.5258	23.538	22.8242	22.8422	23.3127	23.0495
Q2G2H0	Q2G2H0	SAOUHSC_02010		Completeproteome;Referenceproteome	11.331	9	75	1043300000	131		0.950082	0.199312	0.0552598	23.097	23.1883	22.939	23.427	22.9449	22.9214	23.0605	22.9271
Q2G2H1	Q2G2H1	SAOUHSC_02014		Completeproteome;Referenceproteome	6.305	5	92.5	5186100000	67		0.27701	0.1775	0.344071	27.3505	26.6531	27.4082	26.4543	26.5899	26.7358	26.7314	27.0989
Q2G2H3	Q2G2H3	SAOUHSC_02009		Completeproteome;Referenceproteome	58.254	17	43.2	1371400000	147	+	4.35051	0.47984	0.000322275	23.1767	23.3086	23.3246	23.2523	22.7051	22.777	22.8053	22.8555
Q2G2H4	Q2G2H4	SAOUHSC_00002	DNA polymerase III subunit beta	Completeproteome;Cytoplasm;DNA-directedDNApolymerase;DNAreplication;Nucleotidyltransferase;Referenceproteome;Transferase	41.913	40	82	39880000000	864	+	4.51486	0.415187	0	27.8537	27.9501	27.913	27.9842	27.5091	27.5787	27.4668	27.4856
Q2G2H5	Q2G2H5	dnaA	Chromosomal replication initiator protein DnaA	ATP-binding;Completeproteome;Cytoplasm;DNA-binding;DNAreplication;Nucleotide-binding;Referenceproteome	51.965	21	59.2	6628000000	313	+	2.03709	0.233961	0.00478505	25.3234	25.4226	25.4933	25.5933	25.186	25.1809	25.251	25.2788
Q2G2H6	Q2G2H6	mnhF1	Na(+)/H(+) antiporter subunit F1	Antiport;Cellmembrane;Completeproteome;Hydrogeniontransport;Iontransport;Membrane;Referenceproteome;Sodium;Sodiumtransport;Transmembrane;Transmembranehelix;Transport	10.616	1	16.5	51172000	11		0.664416	-0.158475	0.112073	20.6475	20.4414	20.5597	20.7067	20.6865	20.5621	20.7125	21.0282
Q2G2H7	Q2G2H7	mnhD1	Na(+)/H(+) antiporter subunit D1	Antiport;Cellmembrane;Completeproteome;Hydrogeniontransport;Iontransport;Membrane;Referenceproteome;Sodium;Sodiumtransport;Transmembrane;Transmembranehelix;Transport	54.755	1	2.8	415410000	20		0.92209	-0.356938	0.0597432	23.2455	22.7833	23.1327	23.6001	23.3127	23.8034	23.5807	23.4925
Q2G2H9	Q2G2H9	mnhG1	Na(+)/H(+) antiporter subunit G1	Antiport;Cellmembrane;Completeproteome;Hydrogeniontransport;Iontransport;Membrane;Referenceproteome;Sodium;Sodiumtransport;Transmembrane;Transmembranehelix;Transport	12.818	2	21.2	270180000	22		0.211473	-0.100804	0.426127	21.8755	21.6709	22.3455	21.7885	22.1822	22.2076	21.6908	22.0031
Q2G2I1	Q2G2I1	tcaA	Membrane-associated protein TcaA	Antibioticresistance;Cellmembrane;Completeproteome;Membrane;Metal-binding;Referenceproteome;Transmembrane;Transmembranehelix;Zinc;Zinc-finger	52.113	12	39.3	1150300000	157	+	1.22851	-0.138741	0.0278304	22.4759	22.5369	22.3433	22.5518	22.5183	22.6493	22.6088	22.6866
Q2G2J2	Q2G2J2	ssaA2	Staphylococcal secretory antigen ssaA2	Completeproteome;Hydrolase;Referenceproteome;Repeat;Secreted;Signal;Virulence	29.327	17	62.5	149940000000	717	+	3.40139	0.672649	0.000598985	29.3546	29.4592	29.6479	29.5145	28.6667	28.7343	28.9792	28.9054
Q2G2J7	Q2G2J7	SAOUHSC_01414		Completeproteome;Referenceproteome	13.438	6	59.5	871780000	45	+	1.06711	-0.388881	0.0413148	23.3724	23.8706	24.0674	23.7169	24.4797	24.0733	24.1151	23.9147
Q2G2J8	Q2G2J8	SAOUHSC_01413	Uncharacterized protein SAOUHSC_01413	ATP-binding;Completeproteome;Nucleotide-binding;Referenceproteome	29.448	21	76	11232000000	353		0.464497	-0.0457482	0.194839	25.8055	25.8546	25.7727	25.8907	25.8294	25.9203	25.8029	25.9539
Q2G2J9	Q2G2J9	SAOUHSC_01412		Completeproteome;Referenceproteome	73.099	9	15.8	710140000	63		0.695663	0.150253	0.103546	22.7232	22.9226	22.7409	22.9968	22.5914	22.5547	22.7281	22.9082
Q2G2K5	Q2G2K5	ureC	Urease subunit alpha	Completeproteome;Cytoplasm;Hydrolase;Metal-binding;Nickel;Referenceproteome	61.779	5	14.5	96178000	15		0.284044	-0.406465	0.336703	21.7203	19.8829	20.222	20.3432	20.0239	21.6731	21.7126	20.3845
Q2G2K8	Q2G2K8	ureE	Urease accessory protein UreE	Chaperone;Completeproteome;Cytoplasm;Nickel;Nickelinsertion;Referenceproteome	17.339	3	29.3	126260000	18		0.4141	0.32301	0.227453	21.3775	21.4884	20.9904	21.8302	20.3516	21.6029	20.8824	21.5575
Q2G2K9	Q2G2K9	SAOUHSC_00639		Completeproteome;Referenceproteome	28.796	2	10	46385000	14		0.232506	0.158548	0.398588	20.0704	20.5315	19.3444	20.1723	20.1474	19.9774	19.6328	19.7268
Q2G2L0	Q2G2L0	SAOUHSC_00638		Completeproteome;Referenceproteome	24.884	13	65.4	5137300000	218	+	3.49893	0.833993	0.000481283	25.1042	25.5502	25.5669	25.4499	24.4831	24.627	24.6254	24.5997
Q2G2L1	Q2G2L1	tagH	Teichoic acids export ATP-binding protein TagH	ATP-binding;Cellmembrane;Completeproteome;Hydrolase;Membrane;Nucleotide-binding;Referenceproteome;Transport	29.762	20	49.2	4162200000	244		0.883122	-0.203348	0.0656	24.3331	24.7623	24.6616	24.8172	24.7449	24.82	24.8811	24.9416
Q2G2L2	Q2G2L2	SAOUHSC_00637		ATP-binding;Completeproteome;Nucleotide-binding;Referenceproteome	28.024	19	65.6	2706000000	181	+	2.9949	-0.788697	0.000717526	22.9225	23.454	23.3203	23.4716	24.0512	24.0557	24.1867	24.0296
Q2G2L3	Q2G2L3	SAOUHSC_00640		Completeproteome;Glycosyltransferase;Referenceproteome;Transferase	29.133	6	26	1218400000	43	+	1.59431	-0.648265	0.0121751	23.0259	23.6282	23.8025	23.756	23.9349	24.1394	24.1901	24.5414
Q2G2L6	Q2G2L6	SAOUHSC_02812		Completeproteome;Referenceproteome	15.992	2	23.2	104660000	9		0.206877	0.202571	0.432624	19.9065	20.0654	20.9978	20.3994	20.0409	20.7074	19.3253	20.4853
Q2G2L7	Q2G2L7	SAOUHSC_02811		Completeproteome;Referenceproteome	27.165	6	24.8	473180000	43		0.477986	1.10619	0.18751	19.7753	23.8301	23.8641	23.3042	22.425	22.0077	21.026	20.8903
Q2G2M0	Q2G2M0	SAOUHSC_01362	Tautomerase	Completeproteome;Isomerase;Referenceproteome	6.7436	11	95.1	10086000000	220	+	1.62588	-0.343151	0.0109421	25.6878	25.5674	25.5666	25.1793	25.8091	25.9059	25.8696	25.7892
Q2G2M2	Q2G2M2	mprF	Phosphatidylglycerol lysyltransferase	Antibioticresistance;Cellmembrane;Completeproteome;Lipidmetabolism;Membrane;Referenceproteome;Transferase;Transmembrane;Transmembranehelix;Virulence	96.865	13	11.8	1382000000	133		0.613685	0.253121	0.128705	22.7962	23.1022	23.1762	23.4423	22.5678	22.6954	23.1083	23.133
Q2G2M3	Q2G2M3	SAOUHSC_00513		Completeproteome;Methyltransferase;Referenceproteome;Transferase	27.207	23	85.5	7939800000	246	+	1.2496	-0.160277	0.0260498	26.1985	26.1054	26.1155	26.1949	26.2602	26.4391	26.1625	26.3937
Q2G2M4	Q2G2M4	mrnC	Mini-ribonuclease 3	Completeproteome;Cytoplasm;Endonuclease;Hydrolase;Magnesium;Nuclease;Referenceproteome;Ribosomebiogenesis;RNA-binding;rRNA-binding;rRNAprocessing	15.721	6	55.2	932490000	43		0.0923267	-0.0817528	0.65894	22.7653	24.0341	23.6771	24.0373	23.8301	23.7658	23.3598	23.8851
Q2G2M5	Q2G2M5	SAOUHSC_00514		Completeproteome;Referenceproteome	20.25	10	69	2073600000	137		0.472187	0.0958142	0.190254	24.49	24.1596	24.2584	24.5303	24.2931	24.254	24.2107	24.2972
Q2G2M6	Q2G2M6	cysS	Cysteine--tRNA ligase	Aminoacyl-tRNAsynthetase;ATP-binding;Completeproteome;Cytoplasm;Ligase;Metal-binding;Nucleotide-binding;Proteinbiosynthesis;Referenceproteome;Zinc	53.685	32	59.2	24596000000	690	+	1.21575	0.0761018	0.0284697	26.4836	26.5754	26.526	26.5982	26.4162	26.4788	26.4665	26.5174
Q2G2M7	Q2G2M7	SAOUHSC_00510	Serine acetyltransferase	Acyltransferase;Completeproteome;Referenceproteome;Transferase	23.754	12	57.7	1613900000	110		0.108087	-0.0481977	0.619825	23.1594	23.4726	23.8704	23.5964	23.4182	23.737	23.4851	23.6514
Q2G2M8	Q2G2M8	SAOUHSC_02004	UPF0374 protein SAOUHSC_02004	Completeproteome;Referenceproteome	21.703	3	23.3	245540000	25	+	1.4562	0.824794	0.016583	22.7892	22.337	22.6367	22.2565	21.9795	22.1695	21.6605	20.9108
Q2G2M9	Q2G2M9	SAOUHSC_02003	Putative multidrug export ATP-binding/permease protein SAOUHSC_02003	ATP-binding;Cellmembrane;Completeproteome;Hydrolase;Membrane;Nucleotide-binding;Referenceproteome;Transmembrane;Transmembranehelix;Transport	64.862	14	34.8	1039200000	108	+	4.8725	1.05095	0	23.1155	23.2494	23.3343	23.4682	22.1957	22.1933	22.339	22.2357
Q2G2N1	Q2G2N1	SAOUHSC_02001		Completeproteome;Referenceproteome	40.123	6	17.3	188310000	50	+	1.03213	-0.436068	0.0451711	21.0803	20.8693	21.0365	21.2382	21.6477	21.9013	21.4858	20.9338
Q2G2N2	Q2G2N2	SAOUHSC_01358		Completeproteome;Referenceproteome	45.073	7	17.9	118040000	25		0.562915	-0.403695	0.14716	20.6445	19.8162	21.1675	21.0419	21.2062	21.2019	21.2222	20.6546
Q2G2N4	Q2G2N4	glcT	Protein GlcT	Completeproteome;Referenceproteome;Repeat	32.822	5	21.2	277040000	40	+	1.3582	-0.599514	0.0205257	21.7693	21.8795	21.6979	21.1159	22.0448	22.6979	22.0054	22.1125
Q2G2N5	Q2G2N5	SAOUHSC_01354		Completeproteome;Referenceproteome	52.141	7	24.7	641430000	42	+	3.95519	-0.997196	0.000426117	22.0731	22.3	22.3469	22.137	23.2116	23.0698	23.4681	23.0963
Q2G2N9	Q2G2N9	SAOUHSC_02248		Completeproteome;Referenceproteome	17.196	4	34.7	127180000	12		0.970233	-0.428389	0.0528193	19.9858	20.2396	20.3763	20.1472	20.3595	20.74	20.2105	21.1525
Q2G2P2	Q2G2P2	SAOUHSC_00204		Completeproteome;Flavoprotein;Heme;Iron;Metal-binding;Oxygentransport;Referenceproteome;Transport	42.907	39	73.5	66784000000	822	+	2.92297	0.656682	0.000687747	27.8907	28.1099	28.267	28.4211	27.4799	27.5399	27.5217	27.5204
Q2G2P4	Q2G2P4	SAOUHSC_00202		Completeproteome;Referenceproteome	13.935	6	51.7	383810000	34	+	3.21896	1.13058	0.000546296	22.1736	22.5588	22.8587	22.7394	21.3164	21.3031	21.534	21.6548
Q2G2P5	Q2G2P5	SAOUHSC_00201		3D-structure;Completeproteome;Referenceproteome	55.43	26	60.1	2686500000	122		0.531718	-0.358078	0.160656	24.1077	24.9235	24.4871	23.7713	24.63	25.1064	24.2003	24.7852
Q2G2P7	Q2G2P7	hutH	Histidine ammonia-lyase	Completeproteome;Cytoplasm;Histidinemetabolism;Lyase;Referenceproteome	56.075	17	30.8	6790700000	107	+	5.37963	-2.61637	0	25.5121	25.8217	25.4679	25.6196	27.8557	28.1587	28.5527	28.3197
Q2G2P8	Q2G2P8	nnrD	ADP-dependent (S)-NAD(P)H-hydrate dehydratase	ATP-binding;Completeproteome;Lyase;NAD;NADP;Nucleotide-binding;Referenceproteome	30.172	7	30.4	1027200000	70	+	5.03801	-1.83087	0	21.6231	22.1112	21.966	21.7929	23.6438	23.6792	23.9343	23.5594
Q2G2Q0	Q2G2Q0	gyrA	DNA gyrase subunit A	Antibioticresistance;ATP-binding;Completeproteome;Cytoplasm;DNA-binding;Isomerase;Nucleotide-binding;Referenceproteome;Topoisomerase	99.35	80	76.8	63400000000	1171	+	5.5641	1.34236	0	27.6874	27.7524	27.8551	27.8726	26.3066	26.3672	26.5604	26.5639
Q2G2Q1	Q2G2Q1	rpsO	30S ribosomal protein S15	Completeproteome;Referenceproteome;Ribonucleoprotein;Ribosomalprotein;RNA-binding;rRNA-binding	10.608	16	91	51099000000	259	+	1.5327	-0.172267	0.0144236	29.3828	29.4199	29.3611	29.2117	29.48	29.6297	29.4482	29.5066
Q2G2Q2	Q2G2Q2	SAOUHSC_01249	Riboflavin biosynthesis protein	ATP-binding;Completeproteome;FAD;Flavoprotein;FMN;Kinase;Nucleotide-binding;Nucleotidyltransferase;Referenceproteome;Transferase	36.691	16	50.2	3006500000	114	+	3.89408	-0.596306	0.00041196	23.9566	23.7682	24.0738	24.005	24.5056	24.6015	24.551	24.5306
Q2G2Q3	Q2G2Q3	truB	tRNA pseudouridine synthase B	Completeproteome;Isomerase;Referenceproteome;tRNAprocessing	34.593	15	38.4	2409600000	151		0.219244	0.0372887	0.41645	23.7012	23.7132	23.9695	23.8514	23.7635	23.8432	23.7344	23.7451
Q2G2Q4	Q2G2Q4	rbfA	Ribosome-binding factor A	Completeproteome;Cytoplasm;Referenceproteome;rRNAprocessing	13.515	14	97.4	16402000000	304	+	1.70507	-0.227243	0.00960567	26.7846	26.9546	26.951	26.9558	27.2712	27.1945	27.0096	27.0798
Q2G2Q7	Q2G2Q7	SAOUHSC_00276		Completeproteome;Referenceproteome	19.989	3	28.3	402040000	34		0.248521	-0.661379	0.376162	23.4068	19.7512	23.3061	23.3059	23.8686	23.7917	21.2979	23.4571
Q2G2R0	Q2G2R0	lacB	Galactose-6-phosphate isomerase subunit LacB	Completeproteome;Isomerase;Lactosemetabolism;Referenceproteome	18.95	11	52	733480000	96	+	1.64986	0.232252	0.010897	22.9658	22.9239	22.6745	22.834	22.7334	22.5776	22.5519	22.6062
Q2G2R4	Q2G2R4	lacA	Galactose-6-phosphate isomerase subunit LacA	Completeproteome;Isomerase;Lactosemetabolism;Referenceproteome	15.394	10	51.4	1203700000	97	+	1.42785	0.464633	0.0175495	23.2433	23.7584	23.511	23.9412	22.9671	23.1761	23.3735	23.0787
Q2G2R5	Q2G2R5	SAOUHSC_02451		Completeproteome;Referenceproteome	11.37	4	25.2	253290000	54		0.781475	0.237504	0.0833695	22.5581	22.3543	22.5297	22.2648	22.257	22.4558	21.8213	22.2229
Q2G2R7	Q2G2R7	SAOUHSC_02129		Completeproteome;Referenceproteome	12.607	2	26.9	247130000	24	+	2.22524	0.815303	0.0033495	22.8063	22.8951	23.1793	23.5463	22.4848	22.0329	22.4274	22.2207
Q2G2R8	Q2G2R8	sspP	Staphopain A	Completeproteome;Directproteinsequencing;Hydrolase;Protease;Referenceproteome;Secreted;Signal;Thiolprotease;Virulence;Zymogen	44.262	25	52.3	2141700000	199	+	1.92417	0.59732	0.00617535	23.0526	23.304	23.6683	23.7673	22.8615	22.8172	22.7969	22.9272
Q2G2R9	Q2G2R9	SAOUHSC_02131	UPF0316 protein SAOUHSC_02131	Cellmembrane;Completeproteome;Membrane;Referenceproteome;Transmembrane;Transmembranehelix	22.955	11	39	5785000000	211	+	4.06311	0.947175	0.000467925	25.4339	25.5191	25.7246	25.7423	24.4942	24.6882	24.6306	24.8182
Q2G2S0	Q2G2S0	purB	Adenylosuccinate lyase	Completeproteome;Lyase;Purinebiosynthesis;Referenceproteome	49.603	43	70.5	20080000000	696		0.0663443	-0.0299892	0.736434	26.2124	26.7503	26.7745	26.9337	26.6218	26.6559	26.7488	26.7643
Q2G2S6	Q2G2S6	prsA	Foldase protein PrsA	Cellmembrane;Completeproteome;Isomerase;Lipoprotein;Membrane;Palmitate;Referenceproteome;Rotamase;Signal	35.637	36	72.2	33017000000	682	+	6.9722	-1.42815	0	26.582	26.5411	26.4853	26.6134	28.0707	27.9898	27.9982	27.8757
Q2G2S7	Q2G2S7	SAOUHSC_01975		Completeproteome;Hydrolase;Referenceproteome	46.224	23	61.3	7372100000	380	+	3.00935	0.723174	0.000607069	25.501	25.3776	25.2575	25.5213	24.4213	24.6329	24.8428	24.8677
Q2G2S8	Q2G2S8	SAOUHSC_01974		Completeproteome;Referenceproteome	114.42	48	51.8	17326000000	764	+	4.18436	0.452803	0.000510288	25.6475	25.7101	25.5371	25.6651	25.2497	25.1934	25.113	25.1924
Q2G2T0	Q2G2T0	SAOUHSC_01969		Completeproteome;Referenceproteome	13.212	8	57.9	6811700000	120		0.927675	-0.241992	0.0587385	25.7961	26.226	26.0608	26.3566	26.2563	26.4799	26.407	26.2642
Q2G2T1	Q2G2T1	SAOUHSC_01973		Completeproteome;Referenceproteome	35.778	12	38.7	3811500000	181	+	1.10662	0.136315	0.0374423	24.4754	24.4685	24.6259	24.6006	24.4273	24.3049	24.534	24.359
Q2G2T3	Q2G2T3	rplI	50S ribosomal protein L9	Completeproteome;Referenceproteome;Ribonucleoprotein;Ribosomalprotein;RNA-binding;rRNA-binding	16.639	25	93.3	17325000000	521		0.28889	0.0387321	0.332293	27.1252	27.2675	27.2613	27.3875	27.2233	27.2602	27.2203	27.1827
Q2G2T4	Q2G2T4	SAOUHSC_00013	Homoserine O-acetyltransferase	Acyltransferase;Amino-acidbiosynthesis;Completeproteome;Cytoplasm;Methioninebiosynthesis;Referenceproteome;Transferase	36.927	5	16.8	297470000	9		0.287231	-0.328464	0.333143	21.1917	23.1371	22.7997	23.1106	23.0936	22.7745	23.0619	22.6229
Q2G2T6	Q2G2T6	SAOUHSC_00015		Completeproteome;Referenceproteome	73.78	29	45.8	8169400000	414	+	3.49095	0.46445	0.000477454	25.2584	25.2848	25.45	25.5061	24.8924	24.9273	24.9475	24.8743
Q2G2T7	Q2G2T7	SAOUHSC_00713		Completeproteome;Referenceproteome	37.577	4	15.6	295280000	13		0.363735	-0.167768	0.261724	21.8617	21.8181	21.348	21.463	22.0841	21.665	21.9942	21.4186
Q2G2T8	Q2G2T8	SAOUHSC_00712		Completeproteome;Referenceproteome	32.359	24	59.5	6789400000	370	+	2.08112	-0.183566	0.00425068	23.9247	24.0346	24.0671	24.1459	24.2189	24.2372	24.1967	24.2537
Q2G2T9	Q2G2T9	SAOUHSC_00711		Completeproteome;Referenceproteome	51.15	6	17.4	1055000000	83	+	3.94101	0.776026	0.000421769	23.7282	23.573	23.6217	23.8062	22.6963	22.9673	22.9827	22.9785
Q2G2U0	Q2G2U0	SAOUHSC_00710	N-acetylglucosamine-6-phosphate deacetylase	Carbohydratemetabolism;Completeproteome;Hydrolase;Referenceproteome	43.129	14	32.8	5924000000	176		0.872815	0.151149	0.0674819	24.9978	25.2347	25.2443	24.9958	24.8311	25.0598	24.9413	25.0358
Q2G2U1	Q2G2U1	saeS	Histidine protein kinase SaeS	ATP-binding;Cellmembrane;Completeproteome;Kinase;Membrane;Nucleotide-binding;Phosphoprotein;Referenceproteome;Transferase;Transmembrane;Transmembranehelix;Two-componentregulatorysystem;Virulence	39.741	13	36.2	3138700000	171	+	4.2884	-0.619113	0.000309091	23.6362	23.6888	23.8412	23.6622	24.2654	24.4283	24.3493	24.2619
Q2G2U2	Q2G2U2	SAOUHSC_00023		Completeproteome;Referenceproteome	29.931	12	54.2	990730000	131		0.338113	0.0396781	0.283039	22.4607	22.4612	22.4867	22.3744	22.3443	22.3824	22.3624	22.5352
Q2G2U3	Q2G2U3	SAOUHSC_00022		Completeproteome;Referenceproteome	49.007	11	37	551930000	52		0.40572	-0.171463	0.232168	21.9841	21.9491	22.3696	22.549	22.578	22.0534	22.436	22.4703
Q2G2U4	Q2G2U4	walK	Sensor protein kinase WalK	ATP-binding;Cellmembrane;Completeproteome;Kinase;Membrane;Nucleotide-binding;Phosphoprotein;Referenceproteome;Transferase;Transmembrane;Transmembranehelix;Two-componentregulatorysystem	69.923	22	46.5	1749300000	182		0.0910781	0.0324559	0.66096	22.2292	22.5583	22.4324	22.7689	22.3336	22.5709	22.3782	22.5764
Q2G2U5	Q2G2U5	SAOUHSC_00024		Completeproteome;Referenceproteome	30.327	9	57.1	2033800000	116	+	1.77184	0.428604	0.00815923	23.6127	23.6535	23.67	23.7676	23.1685	22.9287	23.4997	23.3924
Q2G2U6	Q2G2U6	walR	Transcriptional regulatory protein WalR	Activator;Completeproteome;Cytoplasm;DNA-binding;Phosphoprotein;Referenceproteome;Transcription;Transcriptionregulation;Two-componentregulatorysystem	27.192	24	73.8	16118000000	433	+	2.98813	0.347547	0.000713115	26.1854	26.0547	26.3223	26.2234	25.7915	25.8626	25.8679	25.8737
Q2G2U9	Q2G2U9	sarA	Transcriptional regulator SarA	Activator;Completeproteome;Cytoplasm;DNA-binding;Metal-binding;Referenceproteome;Repressor;Transcription;Transcriptionregulation;Virulence	14.718	19	78.2	29347000000	371	+	1.98703	-0.265018	0.00554653	27.1641	27.1375	26.9625	27.0726	27.2505	27.358	27.2843	27.5039
Q2G2V2	Q2G2V2	menC	o-succinylbenzoate synthase	Completeproteome;Lyase;Magnesium;Menaquinonebiosynthesis;Metal-binding;Referenceproteome	37.967	7	25.5	228890000	23		0.513251	0.266519	0.168075	21.4138	21.875	21.7573	21.5368	21.9195	21.4519	21.2562	20.8892
Q2G2V3	Q2G2V3	menE	2-succinylbenzoate--CoA ligase	ATP-binding;Completeproteome;Ligase;Menaquinonebiosynthesis;Nucleotide-binding;Referenceproteome	55.415	12	35.4	998710000	64	+	2.48656	0.475343	0.00189032	23.6146	23.5289	23.8185	23.5418	23.0581	23.0915	23.0772	23.3756
Q2G2V7	Q2G2V7	SAOUHSC_02008		Completeproteome;Referenceproteome	31.955	3	12.2	116680000	18		0.0998097	-0.0509481	0.638661	20.9564	21.4563	21.5739	21.6533	21.5308	21.1691	21.4941	21.6497
Q2G2V9	Q2G2V9	SAOUHSC_02006		Completeproteome;Referenceproteome	37.083	11	30.5	1212400000	121	+	3.91463	0.566216	0.000414716	23.2864	23.2787	23.5068	23.4326	22.7471	22.8048	22.7894	22.8983
Q2G2W1	Q2G2W1	SAOUHSC_02629		Cellmembrane;Completeproteome;Membrane;Referenceproteome;Transmembrane;Transmembranehelix;Transport	70.977	1	2.3	91444000	20	+	1.62555	-1.30195	0.0109297	18.7033	19.9188	20.6829	20.169	21.3605	21.2788	20.8833	21.1591
Q2G2W2	Q2G2W2	SAOUHSC_02628		Completeproteome;Referenceproteome	24.288	3	17.9	2627200000	81	+	3.06413	0.49332	0.000623932	25.4654	25.6014	25.5653	25.7671	25.0829	25.0018	25.244	25.0972
Q2G2W3	Q2G2W3	SAOUHSC_02627		Completeproteome;Referenceproteome	34.775	17	62.7	3069100000	214		0.483185	-0.194359	0.184776	22.9164	23.4848	23.6699	23.6827	23.5445	23.6295	23.7045	23.6528
Q2G2W4	Q2G2W4	SAOUHSC_02631		Completeproteome;DNA-binding;Referenceproteome;Transcription;Transcriptionregulation	21.726	2	13.7	322710000	31	+	1.96478	-1.95683	0.00580829	20.2921	19.6755	21.548	21.8351	23.2525	22.7082	22.4758	22.7415
Q2G2W5	Q2G2W5	SAOUHSC_02630		Completeproteome;Referenceproteome	23.024	8	58.6	5569700000	113	+	4.38831	-0.959307	0.000331707	26.391	26.4094	26.5694	26.6242	27.6074	27.5395	27.3134	27.3709
Q2G2W6	Q2G2W6	SAOUHSC_02626		Completeproteome;Referenceproteome	16.306	9	65.5	897990000	87	+	2.73437	-0.602509	0.00127568	21.8661	21.8138	22.0863	22.2227	22.752	22.6342	22.5517	22.4611
Q2G2W8	Q2G2W8	SAOUHSC_00456	Initiation-control protein YabA	Completeproteome;DNAreplication;Referenceproteome	11.649	5	57.1	79930000	13	+	1.09057	0.893236	0.0391506	21.3509	21.3378	21.3489	21.1079	20.6799	20.6808	19.1542	21.0577
Q2G2W9	Q2G2W9	SAOUHSC_00455		Completeproteome;Referenceproteome	30.233	7	34.1	277840000	13		0.12153	0.0649734	0.587	21.7115	22.1289	22.283	21.684	22.0155	21.5082	22.1031	21.9206
Q2G2X0	Q2G2X0	SAOUHSC_00457		Completeproteome;Referenceproteome	28.096	6	19.1	292070000	16		0.697008	0.169136	0.103295	21.9271	21.9836	22.2299	22.1816	22.1125	21.8001	22.0149	21.7181
Q2G2X1	Q2G2X1	SAOUHSC_00454		Completeproteome;Nucleotidyltransferase;Referenceproteome;Transferase	32.178	2	20.4	749310000	33	+	4.00353	0.917183	0.000441281	23.7546	24.1771	23.9119	24.0033	22.9064	23.086	23.0541	23.1317
Q2G2X2	Q2G2X2	SAOUHSC_00645		Completeproteome;Nucleotidyltransferase;Referenceproteome;Transferase	15.817	10	52.3	2871600000	171	+	1.59512	0.167989	0.0119865	23.9381	24.0633	23.9881	24.0627	23.7667	23.7861	23.8488	23.9788
Q2G2X4	Q2G2X4	SAOUHSC_00643		Completeproteome;Referenceproteome	42.435	8	30.5	259050000	51		0.538108	0.340377	0.158392	21.9599	21.893	23.1467	22.2762	21.8246	22.0258	21.9993	22.0645
Q2G2X5	Q2G2X5	SAOUHSC_00642	Transport permease protein	Cellmembrane;Completeproteome;Membrane;Referenceproteome;Transmembrane;Transmembranehelix;Transport	31.489	6	23	306880000	20		0.576393	-0.387377	0.142378	21.06	21.7028	21.5675	21.5599	22.1545	21.8305	21.083	22.3717
Q2G2X6	Q2G2X6	SAOUHSC_00646		Completeproteome;Referenceproteome	48.261	27	50.1	4803000000	399	+	4.91883	0.995585	0	24.4838	24.6311	24.6541	24.8095	23.5827	23.7137	23.7096	23.5902
Q2G2Y3	Q2G2Y3	SAOUHSC_01919		Completeproteome;Referenceproteome	35.864	7	24.2	447470000	68	+	2.57272	1.04587	0.00166722	22.6303	22.451	21.9644	22.5795	21.6192	21.4873	20.9342	21.401
Q53700	Q53700	cobB	NAD-dependent protein deacetylase	Completeproteome;Cytoplasm;Hydrolase;Metal-binding;NAD;Referenceproteome;Zinc	27.051	4	30.5	304250000	40		0.521229	0.486432	0.164289	21.6235	22.152	22.6556	22.5951	21.5499	20.8542	22.3537	22.3228
Q53705	Q53705	lytS	Sensor protein LytS	ATP-binding;Cellmembrane;Completeproteome;Kinase;Membrane;Nucleotide-binding;Phosphoprotein;Referenceproteome;Transferase;Transmembrane;Transmembranehelix;Two-componentregulatorysystem	65.028	4	14	704930000	10		0.366721	-1.11392	0.259211	24.7522	24.6834	19.3239	24.213	24.515	24.5541	24.2383	24.1208
Q53726	Q53726	pcrB	Heptaprenylglyceryl phosphate synthase	Completeproteome;Lipidbiosynthesis;Lipidmetabolism;Magnesium;Metal-binding;Phospholipidbiosynthesis;Phospholipidmetabolism;Referenceproteome;Transferase	25.888	3	20.4	264900000	29	+	2.66049	0.780128	0.0013931	22.6795	22.7296	22.7628	22.5973	22.2884	21.7489	21.6152	21.9961
Q53727	Q53727	pcrA	ATP-dependent DNA helicase PcrA	ATP-binding;Completeproteome;DNA-binding;Helicase;Hydrolase;Nucleotide-binding;Referenceproteome	84.073	45	57.5	13155000000	613	+	5.34208	0.858444	0	25.964	26.023	26.0246	26.1014	25.0329	25.1996	25.254	25.1927
Q7BHL7	Q7BHL7	msrR	Regulatory protein MsrR	Cellmembrane;Completeproteome;Membrane;Referenceproteome;Signal-anchor;Transcription;Transcriptionregulation;Transmembrane;Transmembranehelix	36.97	28	78.9	4447500000	329	+	5.88297	-1.05237	0	22.8433	23.0034	22.7797	22.8263	23.953	23.9546	23.9088	23.8458
Q7X2S2	Q7X2S2	arcC2	Carbamate kinase 2	Argininemetabolism;ATP-binding;Completeproteome;Cytoplasm;Kinase;Nucleotide-binding;Referenceproteome;Transferase	34.329	21	60.1	18563000000	439	+	4.1957	1.33948	0.000284519	27.4798	27.7771	27.6715	27.7751	26.5591	26.3529	26.4236	26.0099
Q93Q23	Q93Q23	mgt	Monofunctional glycosyltransferase	Cellmembrane;Cellshape;Cellwallbiogenesis/degradation;Completeproteome;Directproteinsequencing;Glycosyltransferase;Membrane;Peptidoglycansynthesis;Referenceproteome;Transferase;Transmembrane;Transmembranehelix	31.459	14	55.4	1382400000	137	+	1.13321	0.233069	0.0346225	23.6478	23.5467	23.7315	23.8786	23.4013	23.2843	23.6655	23.5212
Q93T05	Q93T05	mutL	DNA mismatch repair protein MutL	Completeproteome;DNAdamage;DNArepair;Referenceproteome	76.854	25	39.6	4871500000	322	+	3.09689	-0.353949	0.000637555	23.8537	23.8174	23.7421	23.9988	24.196	24.1597	24.2314	24.2407
Q9EZ11	Q9EZ11	dapB	4-hydroxy-tetrahydrodipicolinate reductase	Amino-acidbiosynthesis;Completeproteome;Cytoplasm;Diaminopimelatebiosynthesis;Lysinebiosynthesis;NAD;NADP;Oxidoreductase;Referenceproteome	26.654	4	28.3	251050000	40	+	1.80887	-0.89982	0.00793612	21.1237	20.788	21.7667	21.1726	22.2834	21.6286	22.0967	22.4415
Q9EZ12	Q9EZ12	dapA	4-hydroxy-tetrahydrodipicolinate synthase	Amino-acidbiosynthesis;Completeproteome;Cytoplasm;Diaminopimelatebiosynthesis;Lyase;Lysinebiosynthesis;Referenceproteome;Schiffbase	32.584	2	14.2	100660000	23	+	2.06515	-0.820056	0.00461705	20.391	21.0228	20.8606	21.1959	21.6769	21.399	21.6621	22.0125
Q9F0R1	Q9F0R1	sarR	HTH-type transcriptional regulator SarR	3D-structure;Activator;Completeproteome;Cytoplasm;Directproteinsequencing;DNA-binding;Referenceproteome;Repressor;Transcription;Transcriptionregulation;Virulence	13.669	24	98.3	47670000000	526		0.100843	-0.0294509	0.637058	27.6446	27.8454	27.971	28.0673	27.8143	27.825	28.0493	27.9575
Q9F1K0	Q9F1K0	dnaE	DNA polymerase III subunit alpha	Completeproteome;Cytoplasm;DNA-directedDNApolymerase;DNAreplication;Nucleotidyltransferase;Referenceproteome;Transferase	122.96	11	19.9	7138000000	58	+	3.48	0.682434	0.000474934	27.2083	27.1615	27.2729	27.332	26.5555	26.3771	26.5229	26.7895
Q9KJN3	Q9KJN3	arlS	Signal transduction histidine-protein kinase ArlS	ATP-binding;Cellmembrane;Completeproteome;Kinase;Membrane;Nucleotide-binding;Phosphoprotein;Referenceproteome;Transferase;Transmembrane;Transmembranehelix;Two-componentregulatorysystem;Virulence	52.399	3	11.5	55067000	5		0.668958	-0.727876	0.111213	19.2574	21.2029	19.2154	19.3636	20.0979	20.6155	21.0101	20.2274
Q9KJN4	Q9KJN4	arlR	Response regulator ArlR	Activator;Completeproteome;Cytoplasm;DNA-binding;Phosphoprotein;Referenceproteome;Repressor;Transcription;Transcriptionregulation;Two-componentregulatorysystem;Virulence	25.498	7	49.3	1229500000	71	+	3.94417	-0.968483	0.000423208	23.3002	23.2768	23.4733	23.7187	24.375	24.4699	24.4791	24.3189
Q9RFJ6	Q9RFJ6	rot	HTH-type transcriptional regulator rot	Activator;Completeproteome;DNA-binding;Referenceproteome;Repressor;Transcription;Transcriptionregulation;Virulence	19.37	7	44.6	1876500000	87	+	1.85134	0.36561	0.00706584	24.9534	25.136	25.1517	25.1701	24.8789	24.8372	24.4627	24.77
Q9RQQ0	Q9RQQ0	icaR	Biofilm operon icaADBC HTH-type negative transcriptional regulator IcaR	Completeproteome;DNA-binding;Referenceproteome;Repressor;Transcription;Transcriptionregulation	21.987	4	28	171960000	35		0.0469219	0.0163684	0.8024	21.703	22.0973	21.6616	21.7236	21.6945	21.8785	21.6347	21.9123
Q9ZAH5	Q9ZAH5	alr1	Alanine racemase 1	Completeproteome;Isomerase;Pyridoxalphosphate;Referenceproteome	42.823	19	53.1	4915300000	225	+	0.994915	-0.291219	0.0494995	23.7431	24.131	24.275	24.2544	24.3919	24.1516	24.5459	24.4791
Q9ZAH6	Q9ZAH6	acpS	Holo-[acyl-carrier-protein] synthase	Completeproteome;Cytoplasm;Fattyacidbiosynthesis;Fattyacidmetabolism;Lipidbiosynthesis;Lipidmetabolism;Magnesium;Metal-binding;Referenceproteome;Transferase	13.605	8	56.3	1023800000	110		0.252761	-0.107729	0.371499	22.0408	22.2815	22.164	22.4916	21.952	22.4779	22.3486	22.6303

## Sheet: Table_S5_Colony-B1
protein annotation						MS data				T-test				LFQ intensities
														Colony B.1				S. aureus NCTC 8325 wt.
Protein IDs	Majority protein IDs	Gene name	Protein name	Keywords	Mol. weight [kDa]	Razor + unique peptides	Sequence coverage [%]	Intensity	MS/MS count	Student's T-test Significant B1_wt	-Log Student's T-test p-value B1_wt	Student's T-test Difference B1_wt	Student's T-test q-value B1_wt	Replicate 1	Replicate 2	Replicate 3	Replicate 4	Replicate 1	Replicate 2	Replicate 3	Replicate 4
O05154	O05154	tagX	Putative glycosyltransferase TagX	Cellshape;Cellwallbiogenesis/degradation;Completeproteome;Glycosyltransferase;Referenceproteome;Teichoicacidbiosynthesis;Transferase	41.138	13	41.1	607480000	58		0.165113	-0.0633545	0.509717	22.9613	22.9424	22.8639	22.8234	23.1888	22.7744	22.6551	23.226
O05204	O05204	ahpF	Alkyl hydroperoxide reductase subunit F	Completeproteome;Disulfidebond;FAD;Flavoprotein;NAD;NADP;Oxidoreductase;Redox-activecenter;Referenceproteome	54.72	39	68.6	28094000000	681		0.24698	0.0454469	0.383403	26.5063	26.4388	26.7551	26.5996	26.613	26.5109	26.4688	26.5252
O06446	O06446	secA1	Protein translocase subunit SecA 1	ATP-binding;Cellmembrane;Completeproteome;Cytoplasm;Membrane;Metal-binding;Nucleotide-binding;Proteintransport;Referenceproteome;Translocation;Transport;Zinc	95.959	107	78.2	93404000000	1875	+	1.28143	0.179266	0.026778	27.4619	27.5734	27.4013	27.2313	27.2768	27.2154	27.2669	27.1918
O07325	O07325	ftsA	Cell division protein FtsA	Cellcycle;Celldivision;Cellshape;Completeproteome;Referenceproteome	52.934	36	56.8	33783000000	771	+	1.34213	0.168534	0.0229511	27.762	27.5048	27.5866	27.515	27.4693	27.4209	27.4665	27.3376
O08387	O08387	secY	Protein translocase subunit SecY	Cellmembrane;Completeproteome;Membrane;Proteintransport;Referenceproteome;Translocation;Transmembrane;Transmembranehelix;Transport	47.147	9	15.6	990960000	101		0.0358283	0.0100861	0.852618	23.2374	23.1825	23.0434	22.9244	23.2555	23.0572	22.9309	23.1037
O33599	O33599	lytM	Glycyl-glycine endopeptidase LytM	3D-structure;Cellwallbiogenesis/degradation;Completeproteome;Directproteinsequencing;Hydrolase;Metal-binding;Metalloprotease;Protease;Referenceproteome;Secreted;Signal;Virulence;Zinc;Zymogen	34.316	2	13.6	151750000	18	+	1.9683	1.00336	0.00595973	22.0768	21.9877	21.4038	21.035	20.5843	20.6946	20.3148	20.8961
O34090	O34090	hemC	Porphobilinogen deaminase	Completeproteome;Porphyrinbiosynthesis;Referenceproteome;Transferase	34.354	30	61	8877100000	407	+	1.87348	0.159217	0.00672821	24.8511	24.8105	24.9881	24.8441	24.7281	24.7514	24.644	24.7335
O50581	O50581	recG	ATP-dependent DNA helicase RecG	ATP-binding;Completeproteome;DNA-binding;DNAdamage;DNArecombination;DNArepair;Helicase;Hydrolase;Nucleotide-binding;Referenceproteome	78.342	11	25.8	1448600000	156	+	2.06664	0.499585	0.00479887	23.2548	23.6773	23.5142	23.2449	23.0669	22.856	23.0303	22.7397
O52582	O52582	cdr	Coenzyme A disulfide reductase	3D-structure;Completeproteome;Directproteinsequencing;FAD;Flavoprotein;NADP;Oxidoreductase;Redox-activecenter;Referenceproteome	49.24	32	66	29313000000	812	+	2.58543	-0.10992	0.00158242	27.1908	27.2061	27.2055	27.2477	27.3029	27.3004	27.3779	27.3086
P02976	P02976	spa	Immunoglobulin G-binding protein A	3D-structure;Cellwall;Completeproteome;IgG-bindingprotein;Peptidoglycan-anchor;Referenceproteome;Repeat;Secreted;Signal	56.436	11	35.1	960190000	52		0.549192	0.546647	0.158175	20.6248	20.0901	21.1588	21.2409	19.0977	20.6076	20.6237	20.599
P0A011	P0A011	lacD	Tagatose 1.6-diphosphate aldolase	Completeproteome;Lactosemetabolism;Lyase;Referenceproteome	36.595	15	71.8	2838700000	140		0.405155	0.0962653	0.237405	24.8552	24.8993	24.7332	24.4852	24.6438	24.6358	24.7719	24.5363
P0A086	P0A086	msrA2	Peptide methionine sulfoxide reductase MsrA 2	Completeproteome;Oxidoreductase;Referenceproteome	20.588	7	33.3	3014300000	119		0.0459068	0.0103436	0.815619	25.0735	25.0106	25.0993	25.2291	25.0722	25.0094	25.0103	25.2792
P0A088	P0A088	msrB	Peptide methionine sulfoxide reductase MsrB	Completeproteome;Oxidoreductase;Referenceproteome	16.277	9	54.9	6978000000	150		0.5844	-0.154966	0.145162	26.6085	26.305	26.2413	26.0715	26.545	26.5564	26.3271	26.4177
[truncated: 1,659 more rows]

## Sheet: Table_S5_Colony-C1
protein annotation						MS data				T-test				LFQ intensities
[truncated: 1,674 more rows]
