# Supplementary material for: Isocyanides inhibit bacterial pathogens by covalent targeting of essential metabolic enzymes
Source: Chem Sci. 2024 Jun 26;15(30):11946–55. doi: 10.1039/d4sc01940g (PMC11290450; doi:10.1039/d4sc01940g)
Supplement: SC-015-D4SC01940G-s003 [file SC-015-D4SC01940G-s003.xlsx]

## Sheet: Table_S6
protein annotation									MS data				T-test				LFQ intensities
																	3.13 µM I16				DMSO
Protein IDs	Majority protein IDs	Gene name	Protein name	GOBP name	GOMF name	GOCC name	KEGG name	Mol. weight [kDa]	Razor + unique peptides	Sequence coverage [%]	Intensity	MS/MS count	Student's T-test Significant 3.13_I16_exp_DMSO_exp	-Log Student's T-test p-value 3.13_I16_exp_DMSO_exp	Student's T-test Difference 3.13_I16_exp_DMSO_exp	Student's T-test q-value 3.13_I16_exp_DMSO_exp	Replicate 1	Replicate 2	Replicate 3	Replicate 4	Replicate 1	Replicate 2	Replicate 3	Replicate 4
O05154	O05154	tagX	Putative glycosyltransferase TagX	biological regulation;biosynthetic process;carbohydrate biosynthetic process;carbohydrate metabolic process;cell wall macromolecule biosynthetic process;cell wall macromolecule metabolic process;cell wall organization;cell wall organization or biogenesis;cellular biosynthetic process;cellular carbohydrate metabolic process;cellular cell wall macromolecule metabolic process;cellular cell wall orga…	catalytic activity;transferase activity;transferase activity, transferring glycosyl groups			41.138	11	44.2	1876200000	109	+	2.29879	0.396487	0.00731204	24.4482	24.2716	24.482	24.443	24.2033	24.0294	24.0083	23.8178
O05204	O05204	ahpF	Alkyl hydroperoxide reductase subunit F	biological regulation;cell redox homeostasis;cellular homeostasis;cellular process;homeostatic process;regulation of biological process;regulation of biological quality;regulation of cellular process;response to chemical stimulus;response to inorganic substance;response to oxidative stress;response to reactive oxygen species;response to stimulus;response to stress	alkyl hydroperoxide reductase activity;binding;catalytic activity;coenzyme binding;cofactor binding;disulfide oxidoreductase activity;electron carrier activity;flavin adenine dinucleotide binding;NAD binding;nucleotide binding;oxidoreductase activity;oxidoreductase activity, acting on a sulfur group of donors;oxidoreductase activity, acting on a sulfur group of donors, NAD or NADP as acceptor;oxi…			54.72	37	62.5	63694000000	877		0.35621	0.0376487	0.362876	27.9711	27.9588	27.9335	28.1152	27.9003	27.9864	27.957	27.9842
O06446	O06446	secA1	Protein translocase subunit SecA 1	cellular process;establishment of localization;establishment of localization in cell;establishment of protein localization;intracellular protein transmembrane transport;intracellular protein transport;intracellular transport;protein import;protein targeting;protein transmembrane transport;protein transport;transmembrane transport;transport	adenyl nucleotide binding;adenyl ribonucleotide binding;ATP binding;binding;cation binding;ion binding;metal ion binding;nucleotide binding;purine nucleotide binding;purine ribonucleoside triphosphate binding;purine ribonucleotide binding;ribonucleotide binding	cell part;cytoplasm;intracellular part;membrane;plasma membrane	Bacterial secretion system;Protein export	95.959	95	84.1	159910000000	2506		0.506328	0.0309439	0.255158	28.3254	28.2649	28.3618	28.2875	28.3292	28.2784	28.2644	28.2439
O07325	O07325	ftsA	Cell division protein FtsA	biological regulation;cell cycle;cell division;cellular process;regulation of anatomical structure morphogenesis;regulation of biological process;regulation of biological quality;regulation of cell morphogenesis;regulation of cell shape;regulation of cellular component organization;regulation of cellular process;regulation of developmental process			Cell cycle - Caulobacter	52.934	37	58.3	59994000000	1120		1.01733	0.134085	0.0795297	28.0172	28.0915	28.2228	28.0292	28.016	27.976	27.8121	28.0203
O08387	O08387	secY	Protein translocase subunit SecY	cellular process;establishment of localization;establishment of localization in cell;establishment of protein localization;intracellular protein transmembrane transport;intracellular protein transport;intracellular transport;protein targeting;protein transmembrane transport;protein transport;protein transport by the Sec complex;transmembrane transport;transport		cell part;integral to membrane;intracellular;intrinsic to membrane;membrane;membrane part;plasma membrane	Bacterial secretion system;Protein export	47.147	6	13.3	1392700000	95		0.301532	0.20113	0.422631	23.649	23.6617	23.6851	23.8522	23.688	23.7462	22.6958	23.9135
O34090	O34090	hemC	Porphobilinogen deaminase	biosynthetic process;cellular aromatic compound metabolic process;cellular biosynthetic process;cellular macromolecule metabolic process;cellular metabolic process;cellular nitrogen compound biosynthetic process;cellular nitrogen compound metabolic process;cellular process;cellular protein metabolic process;cofactor biosynthetic process;cofactor metabolic process;heterocycle biosynthetic process;…	catalytic activity;hydroxymethylbilane synthase activity;transferase activity;transferase activity, transferring alkyl or aryl (other than methyl) groups		Porphyrin and chlorophyll metabolism	34.354	27	63.3	22980000000	538	+	1.49826	0.186356	0.0269436	28.0158	28.0224	28.1025	28.148	27.7608	27.8771	28.0441	27.8612
O50581	O50581	recG	ATP-dependent DNA helicase RecG	cellular macromolecule metabolic process;cellular metabolic process;cellular nitrogen compound metabolic process;cellular process;cellular response to stimulus;cellular response to stress;DNA metabolic process;DNA recombination;DNA repair;macromolecule metabolic process;metabolic process;nitrogen compound metabolic process;nucleic acid metabolic process;nucleobase-containing compound metabolic pr…	adenyl nucleotide binding;adenyl ribonucleotide binding;ATP binding;ATPase activity;ATPase activity, coupled;ATP-dependent DNA helicase activity;ATP-dependent helicase activity;binding;catalytic activity;DNA binding;DNA helicase activity;DNA-dependent ATPase activity;helicase activity;hydrolase activity;hydrolase activity, acting on acid anhydrides;hydrolase activity, acting on acid anhydrides, i…		Homologous recombination	78.342	18	37.9	6793700000	225	+	2.04211	0.227307	0.00985062	26.9033	27.0041	27.0443	26.8539	26.7772	26.6655	26.6442	26.8096
O52582	O52582	cdr	Coenzyme A disulfide reductase	biological regulation;cell redox homeostasis;cellular homeostasis;cellular process;homeostatic process;regulation of biological process;regulation of biological quality;regulation of cellular process	binding;catalytic activity;CoA-disulfide reductase activity;coenzyme binding;cofactor binding;flavin adenine dinucleotide binding;intramolecular oxidoreductase activity;intramolecular oxidoreductase activity, interconverting keto- and enol-groups;intramolecular oxidoreductase activity, transposing S-S bonds;isomerase activity;NADP binding;nucleotide binding;oxidoreductase activity;oxidoreductase …			49.24	35	69.2	75253000000	1231	+	3.06338	0.414421	0.00199111	28.3994	28.3584	28.6108	28.4451	27.9952	27.9961	28.0096	28.1551
P02976	P02976	spa	Immunoglobulin G-binding protein A	multi-organism process;pathogenesis		cell part;cell wall;external encapsulating structure;extracellular region;membrane	Staphylococcus aureus infection	56.436	3	13.2	1664300000	36		0.596445	1.15071	0.205438	24.7395	24.0031	24.0191	25.6377	22.3042	21.8118	25.2271	24.4536
P0A011	P0A011	lacD	Tagatose 1,6-diphosphate aldolase	alcohol catabolic process;alcohol metabolic process;carbohydrate catabolic process;carbohydrate metabolic process;catabolic process;cellular carbohydrate catabolic process;cellular carbohydrate metabolic process;cellular metabolic process;cellular process;disaccharide catabolic process;disaccharide metabolic process;D-tagatose 6-phosphate catabolic process;hexose catabolic process;hexose metaboli…	aldehyde-lyase activity;carbon-carbon lyase activity;catalytic activity;kinase activity;lyase activity;phosphotransferase activity, alcohol group as acceptor;tagatose-6-phosphate kinase activity;tagatose-bisphosphate aldolase activity;transferase activity;transferase activity, transferring phosphorus-containing groups		Galactose metabolism	36.595	10	54.3	2770100000	77	+	4.3316	-0.937666	0	24.9861	24.7183	25.1264	24.9826	25.8599	25.8252	25.957	25.922
P0A084	P0A084	msrA1	Peptide methionine sulfoxide reductase MsrA 1	cellular macromolecule metabolic process;cellular metabolic process;cellular process;cellular protein metabolic process;macromolecule metabolic process;macromolecule modification;metabolic process;primary metabolic process;protein metabolic process;protein modification process;protein repair;response to chemical stimulus;response to oxidative stress;response to stimulus;response to stress	catalytic activity;oxidoreductase activity;oxidoreductase activity, acting on a sulfur group of donors;oxidoreductase activity, acting on a sulfur group of donors, disulfide as acceptor;peptide-methionine-(S)-S-oxide reductase activity			19.611	3	29.6	172500000	14		1.11249	0.339504	0.0615006	22.0487	22.2062	21.697	22.0316	21.6621	21.8906	21.7407	21.3321
P0A086	P0A086	msrA2	Peptide methionine sulfoxide reductase MsrA 2	cellular macromolecule metabolic process;cellular metabolic process;cellular process;cellular protein metabolic process;macromolecule metabolic process;macromolecule modification;metabolic process;primary metabolic process;protein metabolic process;protein modification process;protein repair;response to chemical stimulus;response to oxidative stress;response to stimulus;response to stress	catalytic activity;oxidoreductase activity;oxidoreductase activity, acting on a sulfur group of donors;oxidoreductase activity, acting on a sulfur group of donors, disulfide as acceptor;peptide-methionine-(S)-S-oxide reductase activity			20.588	9	41.2	12778000000	280	+	6.13918	2.18102	0	28.142	27.9715	28.3404	27.9724	25.8061	25.863	26.0333	25.9997
P0A088	P0A088	msrB	Peptide methionine sulfoxide reductase MsrB	cellular macromolecule metabolic process;cellular metabolic process;cellular process;cellular protein metabolic process;macromolecule metabolic process;metabolic process;primary metabolic process;protein metabolic process;protein repair;response to chemical stimulus;response to oxidative stress;response to stimulus;response to stress	catalytic activity;oxidoreductase activity;oxidoreductase activity, acting on a sulfur group of donors;oxidoreductase activity, acting on a sulfur group of donors, disulfide as acceptor;peptide-methionine (R)-S-oxide reductase activity			16.277	13	88.7	48261000000	407	+	4.4857	1.79268	0	29.4233	29.0833	29.7145	29.1587	27.7268	27.4979	27.371	27.6132
P0A0B7	P0A0B7	ahpC	Alkyl hydroperoxide reductase subunit C	response to chemical stimulus;response to oxidative stress;response to stimulus;response to stress	antioxidant activity;catalytic activity;oxidoreductase activity;oxidoreductase activity, acting on paired donors, with incorporation or reduction of molecular oxygen;oxidoreductase activity, acting on peroxide as acceptor;peroxidase activity;peroxiredoxin activity			20.976	25	82	282030000000	1325		1.00664	-0.148801	0.0819205	29.869	29.7358	29.7791	30.0413	29.9721	29.9379	30.0099	30.1005
P0A0B9	P0A0B9	lacC	Tagatose-6-phosphate kinase	alcohol catabolic process;alcohol metabolic process;carbohydrate catabolic process;carbohydrate metabolic process;catabolic process;cellular carbohydrate catabolic process;cellular carbohydrate metabolic process;cellular metabolic process;cellular process;disaccharide catabolic process;disaccharide metabolic process;D-tagatose 6-phosphate catabolic process;hexose catabolic process;hexose metaboli…	adenyl nucleotide binding;adenyl ribonucleotide binding;ATP binding;binding;catalytic activity;kinase activity;nucleotide binding;phosphotransferase activity, alcohol group as acceptor;purine nucleotide binding;purine ribonucleoside triphosphate binding;purine ribonucleotide binding;ribonucleotide binding;tagatose-6-phosphate kinase activity;transferase activity;transferase activity, transferring…		Galactose metabolism	33.853	4	20	189970000	14		0.521028	0.230065	0.246979	22.5164	22.7628	22.6203	22.4341	22.6633	22.2791	22.6273	21.8437
P0A0F4	P0A0F4	rplK	50S ribosomal protein L11	biosynthetic process;cellular biosynthetic process;cellular macromolecule biosynthetic process;cellular macromolecule metabolic process;cellular metabolic process;cellular process;cellular protein metabolic process;macromolecule biosynthetic process;macromolecule metabolic process;metabolic process;primary metabolic process;protein metabolic process;translation	binding;LSU rRNA binding;nucleic acid binding;RNA binding;rRNA binding;structural constituent of ribosome;structural molecule activity	cell part;cytoplasmic part;intracellular non-membrane-bounded organelle;intracellular organelle;intracellular part;macromolecular complex;non-membrane-bounded organelle;organelle;ribonucleoprotein complex;ribosome	Ribosome	14.874	21	72.9	289510000000	1070	+	3.66521	-0.517652	0.000944882	30.3206	30.2754	30.0936	30.3029	30.6696	30.736	30.843	30.8144
P0A0F8	P0A0F8	rplO	50S ribosomal protein L15	biosynthetic process;cellular biosynthetic process;cellular macromolecule biosynthetic process;cellular macromolecule metabolic process;cellular metabolic process;cellular process;cellular protein metabolic process;macromolecule biosynthetic process;macromolecule metabolic process;metabolic process;primary metabolic process;protein metabolic process;translation	binding;nucleic acid binding;RNA binding;rRNA binding;structural constituent of ribosome;structural molecule activity	cell part;intracellular organelle part;intracellular part;large ribosomal subunit;macromolecular complex;organelle part;ribonucleoprotein complex	Ribosome	15.597	22	80.8	290710000000	1100		0.680245	-0.283889	0.172366	31.2964	31.3465	31.3298	31.4156	31.8459	31.8515	31.032	31.7944
P0A0G2	P0A0G2	rpmD	50S ribosomal protein L30	biosynthetic process;cellular biosynthetic process;cellular macromolecule biosynthetic process;cellular macromolecule metabolic process;cellular metabolic process;cellular process;cellular protein metabolic process;macromolecule biosynthetic process;macromolecule metabolic process;metabolic process;primary metabolic process;protein metabolic process;translation	structural constituent of ribosome;structural molecule activity	cell part;intracellular organelle part;intracellular part;large ribosomal subunit;macromolecular complex;organelle part;ribonucleoprotein complex	Ribosome	6.5536	19	100	258680000000	848	+	3.1509	-0.483071	0.00195122	30.0813	30.1728	30.014	30.2853	30.5556	30.6989	30.5227	30.7084
P0A0H0	P0A0H0	rpsL	30S ribosomal protein S12	biosynthetic process;cellular biosynthetic process;cellular macromolecule biosynthetic process;cellular macromolecule metabolic process;cellular metabolic process;cellular process;cellular protein metabolic process;macromolecule biosynthetic process;macromolecule metabolic process;metabolic process;primary metabolic process;protein metabolic process;translation	binding;nucleic acid binding;RNA binding;rRNA binding;structural constituent of ribosome;structural molecule activity;tRNA binding	cell part;intracellular organelle part;intracellular part;macromolecular complex;organelle part;ribonucleoprotein complex;small ribosomal subunit	Ribosome	15.287	26	89.8	419390000000	1248	+	2.39852	-0.549603	0.00613811	31.2536	31.3499	31.0121	31.3311	31.9068	31.9694	31.5623	31.7066
P0A0I4	P0A0I4	secE	Protein translocase subunit SecE	cellular process;establishment of localization;establishment of localization in cell;establishment of protein localization;intracellular protein transmembrane transport;intracellular protein transport;intracellular transport;protein secretion;protein targeting;protein transmembrane transport;protein transport;protein transport by the Sec complex;secretion;secretion by cell;transmembrane transport…	active transmembrane transporter activity;macromolecule transmembrane transporter activity;P-P-bond-hydrolysis-driven protein transmembrane transporter activity;P-P-bond-hydrolysis-driven transmembrane transporter activity;primary active transmembrane transporter activity;protein transmembrane transporter activity;protein transporter activity;substrate-specific transmembrane transporter activity;…	cell part;integral to membrane;intracellular;intrinsic to membrane;membrane;membrane part;plasma membrane	Bacterial secretion system;Protein export	6.9322	3	20	2174700000	49		1.1973	-0.369712	0.0520202	24.5941	24.8944	25.2727	24.7357	25.4357	25.267	25.1204	25.1526
P0A0J0	P0A0J0	sigA	RNA polymerase sigma factor SigA	biosynthetic process;cellular biosynthetic process;cellular macromolecule metabolic process;cellular metabolic process;cellular nitrogen compound metabolic process;cellular process;macromolecule metabolic process;metabolic process;nitrogen compound metabolic process;nucleic acid metabolic process;nucleobase-containing compound metabolic process;primary metabolic process;RNA biosynthetic process;R…	binding;core DNA-dependent RNA polymerase binding promoter specificity activity;core RNA polymerase binding transcription factor activity;DNA binding;nucleic acid binding;nucleic acid binding transcription factor activity;protein binding transcription factor activity;sequence-specific DNA binding transcription factor activity;sigma factor activity	cell part;cytoplasm;intracellular part	RNA polymerase	42.17	40	66	30153000000	651		0.181105	-0.0638256	0.583503	26.9406	27.0793	27.2442	26.7934	26.8868	27.15	26.9552	27.3208
P0A0J3	P0A0J3	sodA	Superoxide dismutase [Mn] 1		antioxidant activity;binding;catalytic activity;cation binding;ion binding;metal ion binding;oxidoreductase activity;oxidoreductase activity, acting on superoxide radicals as acceptor;superoxide dismutase activity		Huntington's disease;Peroxisome	22.711	17	99.5	74927000000	471	+	5.73074	1.05814	0	29.4357	29.3702	29.621	29.4814	28.4835	28.4312	28.3731	28.3879
P0A0K3	P0A0K3	SAOUHSC_02013	Uncharacterized protein SAOUHSC_02013		catalytic activity;hydrolase activity;hydrolase activity, acting on glycosyl bonds			18.632	11	88.9	2757000000	128	+	2.89995	-1.92069	0.00294253	22.38	23.6303	22.1335	22.9347	24.5884	24.724	24.8333	24.6157
P0A0M9	P0A0M9	SAOUHSC_00995	UPF0039 protein SAOUHSC_00995		acetyltransferase activity;catalytic activity;N-acetyltransferase activity;N-acyltransferase activity;transferase activity;transferase activity, transferring acyl groups;transferase activity, transferring acyl groups other than amino-acyl groups			16.556	4	34.7	1304200000	53	+	4.42324	-1.44916	0	23.4668	23.7032	23.4983	23.5168	24.9388	25.2409	25.1263	24.6757
P0A0Q0	P0A0Q0	lacR	Lactose phosphotransferase system repressor	biological regulation;biosynthetic process;carbohydrate metabolic process;cellular biosynthetic process;cellular carbohydrate metabolic process;cellular macromolecule biosynthetic process;cellular macromolecule metabolic process;cellular metabolic process;cellular nitrogen compound metabolic process;cellular process;disaccharide metabolic process;lactose metabolic process;macromolecule biosynthet…	binding;DNA binding;nucleic acid binding;nucleic acid binding transcription factor activity;sequence-specific DNA binding transcription factor activity	cell part;intracellular		28.548	14	58.6	3953400000	180	+	1.68438	0.326986	0.0172496	24.749	24.6484	24.8294	24.5255	24.1902	24.2523	24.5131	24.4888
P0A0Q4	P0A0Q4	SAOUHSC_00996	Uncharacterized protein SAOUHSC_00996					18.268	2	23.1	916390000	44	+	1.25289	0.370778	0.0449231	24.4992	24.645	24.0945	24.1758	24.0655	23.7425	23.9813	24.1421
P0C0V7	P0C0V7	glmM	Phosphoglucosamine mutase	carbohydrate metabolic process;metabolic process;primary metabolic process	binding;catalytic activity;cation binding;intramolecular transferase activity;intramolecular transferase activity, phosphotransferases;ion binding;isomerase activity;magnesium ion binding;metal ion binding;phosphoglucosamine mutase activity		Amino sugar and nucleotide sugar metabolism	49.265	42	68.1	152550000000	1180	+	2.58973	-0.31886	0.00482143	29.6583	29.6828	29.6062	29.6495	29.8625	29.9669	30.1436	29.8992
P47768	P47768	rpoB	DNA-directed RNA polymerase subunit beta	biosynthetic process;cellular biosynthetic process;cellular macromolecule biosynthetic process;cellular macromolecule metabolic process;cellular metabolic process;cellular nitrogen compound metabolic process;cellular process;macromolecule biosynthetic process;macromolecule metabolic process;metabolic process;nitrogen compound metabolic process;nucleic acid metabolic process;nucleobase-containing …	binding;catalytic activity;DNA binding;DNA-directed RNA polymerase activity;nucleic acid binding;nucleoside binding;nucleotidyltransferase activity;ribonucleoside binding;RNA polymerase activity;transferase activity;transferase activity, transferring phosphorus-containing groups		Purine metabolism;Pyrimidine metabolism;RNA polymerase	133.22	143	94.4	407930000000	4471	+	3.15255	-0.423668	0.00196078	29.2751	29.3582	29.218	29.455	29.772	29.7711	29.6306	29.8272
P48860	P48860	rplL	50S ribosomal protein L7/L12	biosynthetic process;cellular biosynthetic process;cellular macromolecule biosynthetic process;cellular macromolecule metabolic process;cellular metabolic process;cellular process;cellular protein metabolic process;macromolecule biosynthetic process;macromolecule metabolic process;metabolic process;primary metabolic process;protein metabolic process;translation	structural constituent of ribosome;structural molecule activity	cell part;cytoplasmic part;intracellular non-membrane-bounded organelle;intracellular organelle;intracellular part;macromolecular complex;non-membrane-bounded organelle;organelle;ribonucleoprotein complex;ribosome	Ribosome	12.711	26	100	430620000000	1315	+	3.89125	-0.387693	0.000581818	31.8551	31.8978	32.0118	31.9794	32.2869	32.314	32.2935	32.4005
P48940	P48940	rpsG	30S ribosomal protein S7	biosynthetic process;cellular biosynthetic process;cellular macromolecule biosynthetic process;cellular macromolecule metabolic process;cellular metabolic process;cellular process;cellular protein metabolic process;macromolecule biosynthetic process;macromolecule metabolic process;metabolic process;primary metabolic process;protein metabolic process;translation	binding;nucleic acid binding;RNA binding;rRNA binding;structural constituent of ribosome;structural molecule activity;tRNA binding	cell part;intracellular organelle part;intracellular part;macromolecular complex;organelle part;ribonucleoprotein complex;small ribosomal subunit	Ribosome	17.794	35	94.2	612910000000	1692	+	2.76161	-0.451933	0.00342667	32.6041	32.6139	32.4008	32.6976	33.0331	33.0858	32.874	33.1312
P52078	P52078	SAOUHSC_00997	Uncharacterized protein SAOUHSC_00997					45.685	27	69.4	7865300000	412		0.0959674	0.0245705	0.747527	25.4918	25.179	25.4962	25.2515	25.4477	25.2455	25.3542	25.2728
P60070	P60070	rsbV	Anti-sigma-B factor antagonist	biological regulation;regulation of biological process;regulation of biosynthetic process;regulation of cellular biosynthetic process;regulation of cellular macromolecule biosynthetic process;regulation of cellular metabolic process;regulation of cellular process;regulation of gene expression;regulation of macromolecule biosynthetic process;regulation of macromolecule metabolic process;regulation…				12.205	9	76.9	22995000000	257	+	1.77752	-0.426953	0.015779	27.6398	27.5388	27.2632	27.6962	28.0487	27.7782	28.1609	27.8579
P60393	P60393	rsmH	Ribosomal RNA small subunit methyltransferase H	cellular macromolecule metabolic process;cellular metabolic process;cellular nitrogen compound metabolic process;cellular process;macromolecule metabolic process;macromolecule methylation;macromolecule modification;metabolic process;methylation;ncRNA metabolic process;ncRNA processing;nitrogen compound metabolic process;nucleic acid metabolic process;nucleobase-containing compound metabolic proce…	catalytic activity;methyltransferase activity;N-methyltransferase activity;RNA methyltransferase activity;rRNA (cytosine) methyltransferase activity;rRNA (cytosine-N4-)-methyltransferase activity;rRNA methyltransferase activity;S-adenosylmethionine-dependent methyltransferase activity;transferase activity;transferase activity, transferring one-carbon groups	cell part;cytoplasm;intracellular part		35.681	28	80.1	29893000000	532	+	3.18679	-0.228668	0.00182564	28.5444	28.4275	28.4748	28.4265	28.7553	28.7035	28.6749	28.6541
P60430	P60430	rplB	50S ribosomal protein L2	biosynthetic process;cellular biosynthetic process;cellular macromolecule biosynthetic process;cellular macromolecule metabolic process;cellular metabolic process;cellular process;cellular protein metabolic process;macromolecule biosynthetic process;macromolecule metabolic process;metabolic process;primary metabolic process;protein metabolic process;translation	binding;catalytic activity;nucleic acid binding;RNA binding;rRNA binding;structural constituent of ribosome;structural molecule activity;transferase activity	cell part;intracellular organelle part;intracellular part;large ribosomal subunit;macromolecular complex;organelle part;ribonucleoprotein complex	Ribosome	30.155	51	92.8	580760000000	1872	+	1.35095	-0.366304	0.0370264	31.3109	31.3264	31.2161	31.3276	31.8352	31.7742	31.2366	31.8002
P60611	P60611	lytR	Sensory transduction protein LytR	biological regulation;biosynthetic process;cellular biosynthetic process;cellular macromolecule biosynthetic process;cellular macromolecule metabolic process;cellular metabolic process;cellular nitrogen compound metabolic process;cellular process;cellular response to stimulus;macromolecule biosynthetic process;macromolecule metabolic process;metabolic process;nitrogen compound metabolic process;n…	binding;DNA binding;nucleic acid binding	cell part;cytoplasm;intracellular part	Two-component system	28.221	8	43.1	3316500000	170		0.935874	-0.223582	0.0957177	24.4648	24.3677	24.2802	24.6718	24.7745	24.8296	24.4343	24.6405
P60643	P60643	lrgB	Antiholin-like protein LrgB	cell death;cellular process;cytolysis;death;programmed cell death		cell part;integral to membrane;intrinsic to membrane;membrane;membrane part;plasma membrane	Two-component system	25.097	3	11.6	1508000000	46	+	3.31549	-0.987459	0.00126554	24.0114	24.3744	24.0079	24.4977	25.275	25.1148	25.0714	25.3799
P69848	P69848	moaA	Cyclic pyranopterin monophosphate synthase	aromatic compound biosynthetic process;biosynthetic process;cellular aromatic compound metabolic process;cellular biosynthetic process;cellular metabolic process;cellular nitrogen compound biosynthetic process;cellular nitrogen compound metabolic process;cellular process;coenzyme biosynthetic process;coenzyme metabolic process;cofactor biosynthetic process;cofactor metabolic process;heterocycle b…	4 iron, 4 sulfur cluster binding;binding;cation binding;GTP binding;guanyl nucleotide binding;guanyl ribonucleotide binding;ion binding;iron-sulfur cluster binding;metal cluster binding;metal ion binding;nucleotide binding;purine nucleotide binding;purine ribonucleoside triphosphate binding;purine ribonucleotide binding;ribonucleotide binding	cell part;macromolecular complex;molybdopterin synthase complex;protein complex	Folate biosynthesis;Sulfur relay system	39.077	13	41.8	1556300000	83		0.465843	-0.157876	0.278709	24.2884	23.6393	23.7905	23.8444	24.0744	24.1622	24.0889	23.8686
P72358	P72358	lrgA	Antiholin-like protein LrgA	cell death;cellular process;cytolysis;death;programmed cell death		cell part;integral to membrane;intrinsic to membrane;membrane;membrane part;plasma membrane	Two-component system	15.78	2	7.5	3689100000	67	+	3.1462	-1.0537	0.00194175	25.2906	25.2127	24.6771	25.4164	26.2616	26.1522	26.2536	26.1441
P72360	P72360	scdA	Iron-sulfur cluster repair protein ScdA	cellular macromolecule metabolic process;cellular metabolic process;cellular process;cellular protein metabolic process;macromolecule metabolic process;metabolic process;primary metabolic process;protein metabolic process;protein repair;response to chemical stimulus;response to oxidative stress;response to stimulus;response to stress	binding;cation binding;ion binding;metal ion binding	cell part;cytoplasm;intracellular part		25.485	21	88.4	41075000000	526	+	1.92225	0.280542	0.0120463	27.3044	27.3895	27.4379	27.5965	27.1003	27.0524	27.28	27.1735
P95689	P95689	serS	Serine--tRNA ligase	amine biosynthetic process;amine metabolic process;amino acid activation;biosynthetic process;carboxylic acid biosynthetic process;carboxylic acid metabolic process;cellular amine metabolic process;cellular amino acid biosynthetic process;cellular amino acid metabolic process;cellular biosynthetic process;cellular ketone metabolic process;cellular macromolecule metabolic process;cellular metaboli…	adenyl nucleotide binding;adenyl ribonucleotide binding;aminoacyl-tRNA ligase activity;ATP binding;binding;catalytic activity;ligase activity;ligase activity, forming aminoacyl-tRNA and related compounds;ligase activity, forming carbon-oxygen bonds;nucleotide binding;purine nucleotide binding;purine ribonucleoside triphosphate binding;purine ribonucleotide binding;ribonucleotide binding;serine-tR…	cell part;cytoplasm;intracellular part	Aminoacyl-tRNA biosynthesis	48.639	44	82.7	113360000000	1367	+	4.43662	-0.464602	0	28.5484	28.5417	28.4606	28.5863	28.9491	29.0839	28.9404	29.0221
Q05615	Q05615	aroA	3-phosphoshikimate 1-carboxyvinyltransferase	amine biosynthetic process;amine metabolic process;aromatic amino acid family biosynthetic process;aromatic amino acid family metabolic process;aromatic compound biosynthetic process;biosynthetic process;carboxylic acid biosynthetic process;carboxylic acid metabolic process;cellular amine metabolic process;cellular amino acid biosynthetic process;cellular amino acid metabolic process;cellular aro…	3-phosphoshikimate 1-carboxyvinyltransferase activity;catalytic activity;transferase activity;transferase activity, transferring alkyl or aryl (other than methyl) groups	cell part;cytoplasm;intracellular part	Phenylalanine, tyrosine and tryptophan biosynthesis	47.003	19	69.4	5592200000	233		0.439608	0.0873437	0.296454	24.7602	24.6529	24.8627	24.8767	24.7168	24.6463	24.5494	24.8906
Q2FUQ0	Q2FUQ0	rpmH	50S ribosomal protein L34	biosynthetic process;cellular biosynthetic process;cellular macromolecule biosynthetic process;cellular macromolecule metabolic process;cellular metabolic process;cellular process;cellular protein metabolic process;macromolecule biosynthetic process;macromolecule metabolic process;metabolic process;primary metabolic process;protein metabolic process;translation	structural constituent of ribosome;structural molecule activity	cell part;cytoplasmic part;intracellular non-membrane-bounded organelle;intracellular organelle;intracellular part;macromolecular complex;non-membrane-bounded organelle;organelle;ribonucleoprotein complex;ribosome	Ribosome	5.4335	3	22.2	311230000	20		0.375346	-1.11913	0.345124	21.0366	22.499	21.2031	20.5073	24.7109	24.3369	19.8653	20.8094
Q2FUQ1	Q2FUQ1	rnpA	Ribonuclease P protein component	cellular macromolecule metabolic process;cellular metabolic process;cellular nitrogen compound metabolic process;cellular process;macromolecule metabolic process;metabolic process;ncRNA metabolic process;ncRNA processing;nitrogen compound metabolic process;nucleic acid metabolic process;nucleobase-containing compound metabolic process;primary metabolic process;RNA metabolic process;RNA processing…	binding;catalytic activity;endonuclease activity;endonuclease activity, active with either ribo- or deoxyribonucleic acids and producing 5'-phosphomonoesters;endoribonuclease activity;endoribonuclease activity, producing 5'-phosphomonoesters;hydrolase activity;hydrolase activity, acting on ester bonds;nuclease activity;nucleic acid binding;ribonuclease activity;ribonuclease P activity;RNA binding…			13.652	10	74.4	993460000	78	+	1.51277	-0.703234	0.0265607	22.9197	23.2136	22.8002	23.0136	23.9767	24.0354	23.0147	23.7333
Q2FUQ2	Q2FUQ2	mnmE	tRNA modification GTPase MnmE	biological regulation;cellular macromolecule metabolic process;cellular metabolic process;cellular nitrogen compound metabolic process;cellular process;cellular response to stimulus;intracellular signal transduction;macromolecule metabolic process;macromolecule modification;metabolic process;ncRNA metabolic process;ncRNA processing;nitrogen compound metabolic process;nucleic acid metabolic proces…	binding;catalytic activity;cation binding;GTP binding;GTPase activity;guanyl nucleotide binding;guanyl ribonucleotide binding;hydrolase activity;hydrolase activity, acting on acid anhydrides;hydrolase activity, acting on acid anhydrides, in phosphorus-containing anhydrides;ion binding;metal ion binding;nucleoside-triphosphatase activity;nucleotide binding;purine nucleotide binding;purine ribonucl…	cell part;cytoplasm;intracellular part		51.341	27	46	10166000000	422	+	1.75941	-0.295671	0.0159859	25.1063	25.3739	25.1031	25.2922	25.5392	25.432	25.675	25.4121
Q2FUQ3	Q2FUQ3	mnmG	tRNA uridine 5-carboxymethylaminomethyl modification enzyme MnmG	cellular macromolecule metabolic process;cellular metabolic process;cellular nitrogen compound metabolic process;cellular process;macromolecule metabolic process;macromolecule modification;metabolic process;ncRNA metabolic process;ncRNA processing;nitrogen compound metabolic process;nucleic acid metabolic process;nucleobase-containing compound metabolic process;primary metabolic process;RNA metab…	binding;coenzyme binding;cofactor binding;flavin adenine dinucleotide binding	cell part;cytoplasm;intracellular part		70.115	49	77.9	42437000000	1366	+	3.43961	-0.322196	0.00137423	26.5969	26.5888	26.4334	26.6303	26.8629	26.8824	26.8883	26.9046
Q2FUQ4	Q2FUQ4	rsmG	Ribosomal RNA small subunit methyltransferase G		catalytic activity;methyltransferase activity;N-methyltransferase activity;RNA methyltransferase activity;rRNA (guanine) methyltransferase activity;rRNA (guanine-N7-)-methyltransferase activity;rRNA methyltransferase activity;S-adenosylmethionine-dependent methyltransferase activity;transferase activity;transferase activity, transferring one-carbon groups	cell part;cytoplasm;intracellular part		27.359	17	72.8	6651600000	157		0.535099	-0.215055	0.239867	26.7281	27.1464	27.2306	26.7374	27.321	27.276	26.7857	27.3198
Q2FUQ5	Q2FUQ5	SAOUHSC_03049			binding;DNA binding;nucleic acid binding			32.196	17	64.5	8412300000	290		0.417677	0.0496373	0.311653	25.3846	25.3723	25.3395	25.5241	25.3844	25.2694	25.3427	25.4254
Q2FUQ9	Q2FUQ9	SAOUHSC_03045		biological regulation;biosynthetic process;cellular biosynthetic process;cellular macromolecule biosynthetic process;cellular macromolecule metabolic process;cellular metabolic process;cellular nitrogen compound metabolic process;cellular process;macromolecule biosynthetic process;macromolecule metabolic process;metabolic process;nitrogen compound metabolic process;nucleic acid metabolic process;…	binding;DNA binding;nucleic acid binding	cell part;cytoplasm;intracellular part		8.4222	6	96	3010300000	142	+	2.9964	-1.1131	0.00235983	24.8595	24.5811	24.701	24.7367	25.6276	26.2806	25.4783	25.9442
Q2FUR2	Q2FUR2	SAOUHSC_03041						19.705	2	22.4	491540000	13		1.11457	-0.44743	0.061247	23.5174	22.8225	23.4043	23.4083	24.1323	23.4969	23.6986	23.6145
Q2FUR8	Q2FUR8	SAOUHSC_03034			acetyltransferase activity;catalytic activity;transferase activity;transferase activity, transferring acyl groups;transferase activity, transferring acyl groups other than amino-acyl groups			30.438	11	59.8	8259900000	178	+	4.03484	0.965586	0.000673684	26.4786	26.4554	26.3001	26.3497	25.3026	25.2829	25.6987	25.4372
Q2FUS2	Q2FUS2	SAOUHSC_03030		cation transport;cellular process;establishment of localization;ion transport;metal ion transport;monovalent inorganic cation transport;sodium ion transport;transmembrane transport;transport	transporter activity	cell part;membrane		51.341	5	13.6	2653600000	102		0.113767	-0.0513029	0.712063	25.0455	24.9233	24.9021	25.1546	25.2537	25.2104	24.5898	25.1766
Q2FUS4	Q2FUS4	SAOUHSC_03027						12.556	6	72.3	733230000	54		1.0189	-0.295012	0.0793371	23.0059	23.2015	23.2919	22.7564	23.4757	23.3484	23.5053	23.1063
Q2FUS5	Q2FUS5	SAOUHSC_03026						28.915	2	18.8	279510000	3		0.478335	-0.375666	0.271809	22.7882	22.7409	22.5354	22.87	23.342	23.0895	23.8352	22.1704
Q2FUS6	Q2FUS6	pcp	Pyrrolidone-carboxylate peptidase		catalytic activity;cysteine-type peptidase activity;exopeptidase activity;hydrolase activity;omega peptidase activity;peptidase activity;peptidase activity, acting on L-amino acid peptides;pyroglutamyl-peptidase activity	cell part;cytoplasmic part;cytosol;intracellular part		23.167	2	25	292170000	12		0.60532	0.851785	0.202043	22.8119	23.5237	23.114	22.7098	20.4707	23.2908	21.9626	23.028
Q2FUS7	Q2FUS7	SAOUHSC_03024	UPF0176 protein SAOUHSC_03024					37.057	8	24.8	667850000	40	+	2.39877	0.665128	0.00615385	23.5685	24.0096	24.1056	23.6725	23.3173	22.9941	23.1445	23.2398
Q2FUS8	Q2FUS8	drp35	Lactonase drp35		binding;catalytic activity;cation binding;hydrolase activity;ion binding;metal ion binding	cell part;cytoplasm;intracellular part	beta-Lactam resistance	35.963	26	69.8	47151000000	455	+	5.34326	2.56004	0	29.1283	28.8877	29.3569	28.7313	26.5017	26.2437	26.6871	26.4314
Q2FUS9	Q2FUS9	SAOUHSC_03022	UPF0312 protein SAOUHSC_03022					18.655	13	70.2	8070700000	293	+	3.50093	0.824756	0.00146405	25.9597	26.0342	26.1019	26.2063	25.3435	25.0078	25.4632	25.1886
Q2FUU5	Q2FUU5	lipA	Lipase 1	catabolic process;lipid catabolic process;lipid metabolic process;metabolic process;primary metabolic process	carboxylic ester hydrolase activity;catalytic activity;hydrolase activity;hydrolase activity, acting on ester bonds;lipase activity;triglyceride lipase activity	cell part;extracellular region;membrane	Glycerolipid metabolism	76.675	17	35.3	3469300000	108		0.833053	-0.37365	0.123132	24.6553	25.3005	24.9006	24.4623	25.2433	25.4389	25.3073	24.8238
Q2FUW0	Q2FUW0	SAOUHSC_02991			binding;catalytic activity;coenzyme binding;cofactor binding;flavin reductase activity;FMN binding;nucleotide binding;oxidoreductase activity;oxidoreductase activity, acting on the CH-NH group of donors;oxidoreductase activity, acting on the CH-NH group of donors, NAD or NADP as acceptor			25.85	10	53	3086300000	150	+	2.26551	0.752951	0.00742043	24.4977	24.658	24.8206	24.5751	23.8566	24.098	24.1512	23.4338
Q2FUW1	Q2FUW1	sraP	Serine-rich adhesin for platelets	multi-organism process;pathogenesis	binding;calcium ion binding;cation binding;ion binding;metal ion binding	cell part;cell wall;external encapsulating structure;extracellular region;membrane		228.04	17	7.6	2596100000	110		0.22871	-0.602683	0.513324	20.526	23.972	22.7957	20.4245	24.0457	22.9484	21.4569	21.678
Q2FUW3	Q2FUW3	asp1	Accessory Sec system protein Asp1	establishment of localization;establishment of protein localization;protein transport;transport				61.258	5	14.5	166900000	16		NaN	0	1	22.3524	21.9973	22.5151	22.0409	21.2955	22.195	20.5042	21.461
Q2FUW4	Q2FUW4	asp2	Accessory Sec system protein Asp2	establishment of localization;establishment of protein localization;protein transport;transport				59.57	7	15.7	1194100000	27		0.334545	0.532269	0.386383	23.1636	22.8708	22.0374	20.2357	21.8001	21.5641	21.7426	21.0716
Q2FUW6	Q2FUW6	secA2	Protein translocase subunit SecA 2	cellular process;establishment of localization;establishment of localization in cell;establishment of protein localization;intracellular protein transmembrane transport;intracellular protein transport;intracellular transport;protein import;protein targeting;protein transmembrane transport;protein transport;transmembrane transport;transport	active transmembrane transporter activity;adenyl nucleotide binding;adenyl ribonucleotide binding;ATP binding;binding;macromolecule transmembrane transporter activity;nucleotide binding;P-P-bond-hydrolysis-driven protein transmembrane transporter activity;P-P-bond-hydrolysis-driven transmembrane transporter activity;primary active transmembrane transporter activity;protein transmembrane transport…	cell part;cytoplasm;intracellular part;membrane;plasma membrane	Bacterial secretion system;Protein export	90.929	8	17	714120000	9		0.352736	-0.161318	0.366529	23.3031	23.555	23.4864	23.7345	23.5613	23.6445	24.1726	23.3458
Q2FUW7	Q2FUW7	gtf1	Glycosyltransferase Gtf1	biosynthetic process;metabolic process	catalytic activity;transferase activity;transferase activity, transferring glycosyl groups	cell part;cytoplasm;intracellular part;membrane;plasma membrane		58.272	6	18.5	1253000000	19		0.366613	-0.894939	0.352067	20.785	21.313	25.1486	24.058	23.6651	23.8364	23.5523	23.8306
Q2FUW8	Q2FUW8	gtf2	Glycosyltransferase stabilizing protein Gtf2	biological regulation;posttranscriptional regulation of gene expression;regulation of biological process;regulation of biological quality;regulation of gene expression;regulation of macromolecule metabolic process;regulation of metabolic process;regulation of protein stability		cell part;membrane;plasma membrane		53.028	8	19.5	204760000	47		0.331385	-0.388144	0.389531	21.8891	21.6028	21.2555	21.2135	22.1045	22.4398	20.4825	22.4867
Q2FUX0	Q2FUX0	SAOUHSC_02975		carbohydrate transport;establishment of localization;organic substance transport;phosphoenolpyruvate-dependent sugar phosphotransferase system;transport	active transmembrane transporter activity;carbohydrate transmembrane transporter activity;catalytic activity;cation transmembrane transporter activity;cation:sugar symporter activity;fructose transmembrane transporter activity;hexose transmembrane transporter activity;ion transmembrane transporter activity;monosaccharide transmembrane transporter activity;phosphotransferase activity, alcohol grou…	cell part;integral to membrane;intrinsic to membrane;membrane;membrane part;plasma membrane	Amino sugar and nucleotide sugar metabolism;Fructose and mannose metabolism;Phosphotransferase system (PTS)	69.882	10	21.8	2797100000	144		0.0562761	-0.0145454	0.845859	25.2874	25.2299	25.1345	25.4944	25.2934	25.3541	25.1637	25.3932
Q2FUX1	Q2FUX1	SAOUHSC_02974		biological regulation;carbohydrate transport;establishment of localization;organic substance transport;phosphoenolpyruvate-dependent sugar phosphotransferase system;regulation of biological process;regulation of biosynthetic process;regulation of cellular biosynthetic process;regulation of cellular macromolecule biosynthetic process;regulation of cellular metabolic process;regulation of cellular …	active transmembrane transporter activity;carbohydrate transmembrane transporter activity;catalytic activity;phosphotransferase activity, alcohol group as acceptor;protein-N(PI)-phosphohistidine-sugar phosphotransferase activity;substrate-specific transmembrane transporter activity;substrate-specific transporter activity;transferase activity;transferase activity, transferring phosphorus-containin…			72.978	6	15.9	179350000	9		0.0791503	0.0901933	0.7877	21.2894	21.7092	21.4234	21.5702	22.0821	21.4362	20.2751	21.838
Q2FUX3	Q2FUX3	isaB	Immunodominant staphylococcal antigen B			extracellular region		19.37	18	57.1	8418200000	304		0.942839	0.85412	0.0947669	23.9158	23.836	24.1011	24.016	23.1039	23.6501	21.8257	23.8726
Q2FUX5	Q2FUX5	argR	Arginine repressor	amine biosynthetic process;amine metabolic process;arginine biosynthetic process;arginine metabolic process;biosynthetic process;carboxylic acid biosynthetic process;carboxylic acid metabolic process;cellular amine metabolic process;cellular amino acid biosynthetic process;cellular amino acid metabolic process;cellular biosynthetic process;cellular component assembly;cellular component organizati…	amine binding;amino acid binding;arginine binding;binding;carboxylic acid binding;DNA binding;nucleic acid binding;nucleic acid binding transcription factor activity;sequence-specific DNA binding transcription factor activity	cell part;cytoplasm;intracellular part		17.377	5	30.9	317970000	14	+	1.80238	1.49101	0.0152694	23.7959	22.9912	23.0568	22.6831	21.5106	22.673	21.5401	20.8394
Q2FUX7	Q2FUX7	arcA	Arginine deiminase	amine catabolic process;amine metabolic process;arginine catabolic process;arginine catabolic process to ornithine;arginine metabolic process;carboxylic acid catabolic process;carboxylic acid metabolic process;catabolic process;cellular amine metabolic process;cellular amino acid catabolic process;cellular amino acid metabolic process;cellular catabolic process;cellular ketone metabolic process;c…	arginine deiminase activity;catalytic activity;hydrolase activity;hydrolase activity, acting on carbon-nitrogen (but not peptide) bonds;hydrolase activity, acting on carbon-nitrogen (but not peptide) bonds, in linear amidines	cell part;cytoplasm;intracellular part	Arginine and proline metabolism	46.914	53	83.2	258940000000	1619		0.166423	0.161471	0.608005	27.8558	26.714	27.3213	27.1559	27.532	26.6033	27.6727	26.5931
Q2FUX8	Q2FUX8	argF	Ornithine carbamoyltransferase	amine biosynthetic process;amine metabolic process;arginine biosynthetic process;arginine metabolic process;biosynthetic process;carboxylic acid biosynthetic process;carboxylic acid metabolic process;cellular amine metabolic process;cellular amino acid biosynthetic process;cellular amino acid metabolic process;cellular biosynthetic process;cellular ketone metabolic process;cellular metabolic proc…	amine binding;amino acid binding;binding;carboxyl- or carbamoyltransferase activity;carboxylic acid binding;catalytic activity;ornithine carbamoyltransferase activity;transferase activity;transferase activity, transferring one-carbon groups	cell part;cytoplasm;intracellular part	Arginine and proline metabolism	37.762	46	89.6	335410000000	1531		0.112356	0.114526	0.713502	28.6442	27.4755	28.0562	27.9604	28.343	27.4281	28.5013	27.4058
Q2FUY1	Q2FUY1	arcR	HTH-type transcriptional regulator ArcR	biological regulation;biosynthetic process;cellular biosynthetic process;cellular macromolecule biosynthetic process;cellular macromolecule metabolic process;cellular metabolic process;cellular nitrogen compound metabolic process;cellular process;macromolecule biosynthetic process;macromolecule metabolic process;metabolic process;nitrogen compound metabolic process;nucleic acid metabolic process;…	adenyl nucleotide binding;adenyl ribonucleotide binding;AMP binding;binding;cAMP binding;cyclic nucleotide binding;DNA binding;nucleic acid binding;nucleotide binding;purine nucleotide binding;purine ribonucleotide binding;ribonucleotide binding	cell part;cytoplasm;intracellular part		27.428	7	33.3	2337300000	64		0.299594	0.51266	0.424917	24.6189	22.6513	23.817	23.5101	23.5118	21.5377	24.3588	23.1384
Q2FUY2	Q2FUY2	clfB	Clumping factor B	biological adhesion;cell adhesion;cellular process;multi-organism process;pathogenesis		cell part;cell wall;external encapsulating structure;extracellular region;membrane	Staphylococcus aureus infection	93.593	7	10.4	696820000	33		0.306681	-0.21598	0.417684	23.3002	22.9432	23.5323	23.5804	22.8698	23.4451	23.9195	23.9856
Q2FUY3	Q2FUY3	SAOUHSC_02962						29.096	11	80.6	5723400000	165	+	2.77539	0.539126	0.00331973	25.5914	25.535	25.6248	25.4706	24.9124	24.805	25.1504	25.1975
Q2FUY9	Q2FUY9	SAOUHSC_02956		biological regulation;biosynthetic process;cellular biosynthetic process;cellular macromolecule biosynthetic process;cellular macromolecule metabolic process;cellular metabolic process;cellular nitrogen compound metabolic process;cellular process;cellular response to stimulus;macromolecule biosynthetic process;macromolecule metabolic process;metabolic process;nitrogen compound metabolic process;n…	binding;DNA binding;nucleic acid binding			25.392	5	21.7	550550000	41	+	2.18966	0.395354	0.00774049	24.2379	24.1035	24.0655	24.1415	23.8556	23.4862	23.8743	23.7509
Q2FUZ0	Q2FUZ0	SAOUHSC_02955	Histidine kinase		adenyl nucleotide binding;adenyl ribonucleotide binding;ATP binding;binding;catalytic activity;kinase activity;molecular transducer activity;nucleotide binding;phosphotransferase activity, alcohol group as acceptor;phosphotransferase activity, nitrogenous group as acceptor;protein histidine kinase activity;protein kinase activity;purine nucleotide binding;purine ribonucleoside triphosphate bindin…	cell part;membrane		34.019	4	18	136290000	7		0.714246	-0.735409	0.159595	21.7841	22.2691	20.1884	21.5387	22.6093	22.1559	21.5465	22.4102
Q2FUZ1	Q2FUZ1	SAOUHSC_02954			adenyl nucleotide binding;adenyl ribonucleotide binding;ATP binding;ATPase activity;binding;catalytic activity;hydrolase activity;hydrolase activity, acting on acid anhydrides;hydrolase activity, acting on acid anhydrides, in phosphorus-containing anhydrides;nucleoside-triphosphatase activity;nucleotide binding;purine nucleotide binding;purine ribonucleoside triphosphate binding;purine ribonucleo…			27.73	5	25.1	8532000000	18		0.0780175	-0.446479	0.789895	28.1305	28.6651	27.3116	22.0205	28.2462	28.3881	22.8414	28.4379
Q2FUZ8	Q2FUZ8	SAOUHSC_02947	Sulfite reductase [NADPH] flavoprotein alpha-component	amine biosynthetic process;amine metabolic process;biosynthetic process;carboxylic acid biosynthetic process;carboxylic acid metabolic process;cellular amine metabolic process;cellular amino acid biosynthetic process;cellular amino acid metabolic process;cellular biosynthetic process;cellular ketone metabolic process;cellular metabolic process;cellular nitrogen compound biosynthetic process;cellu…	binding;catalytic activity;cation binding;coenzyme binding;cofactor binding;flavin adenine dinucleotide binding;FMN binding;ion binding;iron ion binding;metal ion binding;nucleotide binding;oxidoreductase activity;oxidoreductase activity, acting on a sulfur group of donors;oxidoreductase activity, acting on a sulfur group of donors, NAD or NADP as acceptor;oxidoreductase activity, acting on NADH …		Sulfur metabolism	72.212	17	31.3	12460000000	384	+	3.38324	0.47214	0.00130233	27.9951	28.1512	28.2458	28.1238	27.639	27.7591	27.6765	27.5526
Q2FUZ9	Q2FUZ9	SAOUHSC_02945		biosynthetic process;cellular biosynthetic process;cellular metabolic process;cellular nitrogen compound biosynthetic process;cellular nitrogen compound metabolic process;cellular process;cofactor biosynthetic process;cofactor metabolic process;heme biosynthetic process;heme metabolic process;heterocycle biosynthetic process;heterocycle metabolic process;metabolic process;nitrogen compound metabo…	catalytic activity;oxidoreductase activity;oxidoreductase activity, acting on the CH-CH group of donors;oxidoreductase activity, acting on the CH-CH group of donors, NAD or NADP as acceptor;precorrin-2 dehydrogenase activity		Porphyrin and chlorophyll metabolism	22.542	5	55.7	1934900000	16		0.446215	1.39124	0.291375	25.2674	25.6587	25.5117	26.2667	25.7003	25.6061	25.6914	20.1418
Q2FV02	Q2FV02	SAOUHSC_02942		biosynthetic process;cellular biosynthetic process;cellular macromolecule biosynthetic process;cellular macromolecule metabolic process;cellular metabolic process;cellular nitrogen compound metabolic process;cellular process;DNA metabolic process;DNA replication;macromolecule biosynthetic process;macromolecule metabolic process;metabolic process;nitrogen compound metabolic process;nucleic acid me…	catalytic activity;oxidoreductase activity;oxidoreductase activity, acting on CH or CH2 groups;oxidoreductase activity, acting on CH or CH2 groups, disulfide as acceptor;ribonucleoside-triphosphate reductase activity		Purine metabolism;Pyrimidine metabolism	70.479	16	27.9	1530000000	139	+	1.71547	-0.432807	0.0165279	23.6156	23.7224	24.0257	23.8972	24.4636	24.3016	23.9751	24.2519
Q2FV06	Q2FV06	SAOUHSC_02937			transporter activity	cell part;integral to membrane;intrinsic to membrane;membrane;membrane part;plasma membrane		59.51	2	3	587870000	19	+	2.39886	-1.40115	0.00616967	23.1918	23.858	23.8368	22.9945	24.9209	25.2692	24.26	25.0357
Q2FV08	Q2FV08	SAOUHSC_02935						21.742	14	82.4	13074000000	242		0.886047	0.103845	0.108249	26.7915	26.8844	26.7794	26.7089	26.5699	26.7881	26.6607	26.7301
Q2FV10	Q2FV10	SAOUHSC_02933	Betaine-aldehyde dehydrogenase	alcohol metabolic process;amine biosynthetic process;amine metabolic process;betaine biosynthetic process;betaine metabolic process;biosynthetic process;carboxylic acid biosynthetic process;carboxylic acid metabolic process;cellular amine metabolic process;cellular amino acid biosynthetic process;cellular amino acid metabolic process;cellular biogenic amine metabolic process;cellular biosynthetic…	betaine-aldehyde dehydrogenase activity;binding;catalytic activity;cation binding;ion binding;metal ion binding;oxidoreductase activity;oxidoreductase activity, acting on the aldehyde or oxo group of donors;oxidoreductase activity, acting on the aldehyde or oxo group of donors, NAD or NADP as acceptor		Glycine, serine and threonine metabolism	54.622	36	80	53113000000	1009	+	2.15673	0.793317	0.00784141	28.5073	28.9389	28.7023	28.2501	27.5768	28.1738	27.8212	27.6534
Q2FV11	Q2FV11	betA	Oxygen-dependent choline dehydrogenase	alcohol metabolic process;amine biosynthetic process;amine metabolic process;betaine biosynthetic process;betaine metabolic process;biosynthetic process;carboxylic acid biosynthetic process;carboxylic acid metabolic process;cellular amine metabolic process;cellular amino acid biosynthetic process;cellular amino acid metabolic process;cellular biogenic amine metabolic process;cellular biosynthetic…	betaine-aldehyde dehydrogenase activity;binding;catalytic activity;choline dehydrogenase activity;coenzyme binding;cofactor binding;flavin adenine dinucleotide binding;oxidoreductase activity;oxidoreductase activity, acting on CH-OH group of donors;oxidoreductase activity, acting on the aldehyde or oxo group of donors;oxidoreductase activity, acting on the aldehyde or oxo group of donors, NAD or …		Glycine, serine and threonine metabolism	63.609	49	80.7	72556000000	1492		1.03766	0.425633	0.074933	28.0152	28.5634	28.2703	27.787	27.5464	28.1208	27.6428	27.6234
Q2FV14	Q2FV14	SAOUHSC_02929			catalytic activity		Carbon fixation pathways in prokaryotes;Glycolysis / Gluconeogenesis;Methane metabolism;Propanoate metabolism;Pyruvate metabolism	59.748	33	59.6	13600000000	594	+	1.46629	0.301356	0.0292245	25.6149	25.5119	25.8393	25.7506	25.4091	25.1821	25.3365	25.5836
Q2FV16	Q2FV16	mqo	Probable malate:quinone oxidoreductase	acetyl-CoA catabolic process;acetyl-CoA metabolic process;catabolic process;cellular catabolic process;cellular metabolic process;cellular process;coenzyme catabolic process;coenzyme metabolic process;cofactor catabolic process;cofactor metabolic process;metabolic process;tricarboxylic acid cycle	catalytic activity;malate dehydrogenase (menaquinone) activity;malate dehydrogenase (quinone) activity;malate dehydrogenase activity;oxidoreductase activity;oxidoreductase activity, acting on CH-OH group of donors;oxidoreductase activity, acting on the CH-OH group of donors, quinone or similar compound as acceptor		Pyruvate metabolism	55.998	86	90.8	763370000000	3715		0.507677	0.0595808	0.254716	30.6583	30.6905	30.6281	30.8107	30.5951	30.5782	30.6372	30.7387
Q2FV17	Q2FV17	fda	Fructose-bisphosphate aldolase class 1	alcohol catabolic process;alcohol metabolic process;carbohydrate catabolic process;carbohydrate metabolic process;catabolic process;cellular carbohydrate catabolic process;cellular carbohydrate metabolic process;cellular metabolic process;cellular process;generation of precursor metabolites and energy;glucose catabolic process;glucose metabolic process;glycolysis;hexose catabolic process;hexose m…	aldehyde-lyase activity;carbon-carbon lyase activity;catalytic activity;fructose-bisphosphate aldolase activity;lyase activity		Carbon fixation in photosynthetic organisms;Fructose and mannose metabolism;Glycolysis / Gluconeogenesis;Pentose phosphate pathway	33.054	55	100	680010000000	2549	+	3.06164	0.705079	0.00196491	31.4338	31.2768	31.3481	31.7363	30.6799	30.6263	30.7999	30.8684
Q2FV19	Q2FV19	SAOUHSC_02921		acetoin biosynthetic process;acetoin metabolic process;biosynthetic process;cellular biosynthetic process;cellular ketone metabolic process;cellular metabolic process;cellular process;ketone biosynthetic process;metabolic process;small molecule biosynthetic process;small molecule metabolic process	acetolactate decarboxylase activity;carbon-carbon lyase activity;carboxy-lyase activity;catalytic activity;lyase activity		Butanoate metabolism;C5-Branched dibasic acid metabolism	26.406	4	26.9	1685000000	42	+	1.78432	-0.48728	0.0155564	24.4986	24.4575	24.3513	24.2861	24.8184	24.5194	25.0828	25.1221
Q2FV20	Q2FV20	SAOUHSC_02920	2-dehydropantoate 2-reductase	amine biosynthetic process;amine metabolic process;biosynthetic process;carboxylic acid biosynthetic process;carboxylic acid metabolic process;cellular amine metabolic process;cellular amino acid biosynthetic process;cellular amino acid metabolic process;cellular biosynthetic process;cellular ketone metabolic process;cellular metabolic process;cellular modified amino acid biosynthetic process;cel…	2-dehydropantoate 2-reductase activity;binding;catalytic activity;coenzyme binding;cofactor binding;NADP binding;nucleotide binding;oxidoreductase activity;oxidoreductase activity, acting on CH-OH group of donors;oxidoreductase activity, acting on the CH-OH group of donors, NAD or NADP as acceptor	cell part;cytoplasm;intracellular part	Pantothenate and CoA biosynthesis	32.357	4	16.1	1568800000	69	+	1.24887	0.327322	0.0455345	24.4447	24.2383	24.4413	24.3557	24.0324	23.7819	23.9569	24.3996
Q2FV21	Q2FV21	panB	3-methyl-2-oxobutanoate hydroxymethyltransferase	amine biosynthetic process;amine metabolic process;biosynthetic process;carboxylic acid biosynthetic process;carboxylic acid metabolic process;cellular amine metabolic process;cellular amino acid biosynthetic process;cellular amino acid metabolic process;cellular biosynthetic process;cellular ketone metabolic process;cellular metabolic process;cellular modified amino acid biosynthetic process;cel…	3-methyl-2-oxobutanoate hydroxymethyltransferase activity;binding;catalytic activity;cation binding;hydroxymethyl-, formyl- and related transferase activity;ion binding;metal ion binding;transferase activity;transferase activity, transferring one-carbon groups	cell part;cytoplasm;intracellular part	Pantothenate and CoA biosynthesis	29.255	28	98.5	19059000000	661	+	2.81419	0.305001	0.00329078	26.5384	26.4402	26.6305	26.66	26.2886	26.1884	26.2962	26.2759
Q2FV22	Q2FV22	panC	Pantothenate synthetase	amine biosynthetic process;amine metabolic process;biosynthetic process;carboxylic acid biosynthetic process;carboxylic acid metabolic process;cellular amine metabolic process;cellular amino acid biosynthetic process;cellular amino acid metabolic process;cellular biosynthetic process;cellular ketone metabolic process;cellular metabolic process;cellular modified amino acid biosynthetic process;cel…	acid-amino acid ligase activity;adenyl nucleotide binding;adenyl ribonucleotide binding;ATP binding;binding;catalytic activity;ligase activity;ligase activity, forming carbon-nitrogen bonds;nucleotide binding;pantoate-beta-alanine ligase activity;purine nucleotide binding;purine ribonucleoside triphosphate binding;purine ribonucleotide binding;ribonucleotide binding	cell part;cytoplasm;intracellular part	beta-Alanine metabolism;Pantothenate and CoA biosynthesis	31.534	16	51.9	8025900000	263		0.454479	0.0376573	0.286134	25.9113	25.8806	25.8435	25.9313	25.7791	25.8814	25.9266	25.829
Q2FV23	Q2FV23	panD	Aspartate 1-decarboxylase;Aspartate 1-decarboxylase alpha chain;Aspartate 1-decarboxylase beta chain	alanine biosynthetic process;alanine metabolic process;amine biosynthetic process;amine metabolic process;biosynthetic process;carboxylic acid biosynthetic process;carboxylic acid metabolic process;cellular amine metabolic process;cellular amino acid biosynthetic process;cellular amino acid metabolic process;cellular biosynthetic process;cellular ketone metabolic process;cellular metabolic proces…	aspartate 1-decarboxylase activity;carbon-carbon lyase activity;carboxy-lyase activity;catalytic activity;lyase activity	cell part;cytoplasm;intracellular part	beta-Alanine metabolism;Pantothenate and CoA biosynthesis	14.05	8	66.1	1607700000	63		1.01604	0.446198	0.0796944	25.9363	25.5321	26.3641	25.8474	25.5799	25.4635	25.7769	25.0748
Q2FV24	Q2FV24	SAOUHSC_02915			catalytic activity;dipeptidyl-peptidase activity;exopeptidase activity;hydrolase activity;peptidase activity;peptidase activity, acting on L-amino acid peptides			64.289	7	17.9	1214700000	20		0.775608	-0.246142	0.138283	24.7997	24.6743	24.9247	24.3971	24.8049	25.1452	24.7139	25.1162
Q2FV27	Q2FV27	SAOUHSC_02912						16.939	10	78.5	13951000000	197	+	3.9234	0.914651	0.000592593	27.3087	27.4597	27.5579	27.135	26.4559	26.5183	26.5144	26.3141
Q2FV28	Q2FV28	SAOUHSC_02911						27.789	15	52.9	3518700000	174	+	2.02574	-0.497958	0.0102951	24.4029	24.4324	24.4994	24.7996	24.9002	24.8988	25.0191	25.3081
Q2FV29	Q2FV29	SAOUHSC_02910						10.712	3	41.8	150520000	19		0.882537	0.768818	0.109166	22.6154	22.8162	22.9423	22.4729	22.4317	22.6439	20.7344	21.9615
Q2FV30	Q2FV30	SAOUHSC_02909	Dihydroorotate dehydrogenase (quinone)	biosynthetic process;cellular aromatic compound metabolic process;cellular biosynthetic process;cellular metabolic process;cellular nitrogen compound biosynthetic process;cellular nitrogen compound metabolic process;cellular process;'de novo' pyrimidine base biosynthetic process;'de novo' UMP biosynthetic process;heterocycle biosynthetic process;heterocycle metabolic process;metabolic process;nit…	catalytic activity;dihydroorotate dehydrogenase activity;oxidoreductase activity;oxidoreductase activity, acting on the CH-CH group of donors;oxidoreductase activity, acting on the CH-CH group of donors, quinone or related compound as acceptor	cell part;membrane	Pyrimidine metabolism	39.536	24	67.2	17838000000	535		0.544052	0.139605	0.234861	26.2613	26.4174	26.3887	26.4238	26.1607	26.3266	25.9592	26.4862
Q2FV31	Q2FV31	SAOUHSC_02908			catalytic activity;transferase activity;transferase activity, transferring phosphorus-containing groups			32.988	5	17	154560000	9		0.263848	-0.408054	0.465661	20.4199	21.5238	23.1078	21.9199	22.7591	21.6636	22.6114	21.5695
Q2FV32	Q2FV32	SAOUHSC_02907						9.7986	1	29.3	680530000	33		0.243014	-0.671988	0.492208	20.3606	24.4747	23.5455	23.6563	24.3467	24.6281	24.0209	21.7294
Q2FV33	Q2FV33	SAOUHSC_02906						14.822	5	50	871290000	60		0.379581	-0.40812	0.341725	21.501	23.2792	22.2651	22.4965	23.2905	21.9923	22.7315	23.16
Q2FV34	Q2FV34	SAOUHSC_02905						11.578	7	57.1	4369500000	139		0.122405	0.0204806	0.692801	25.1274	25.3111	25.2928	25.2133	25.1516	25.173	25.185	25.3531
Q2FV39	Q2FV39	SAOUHSC_02900	Uncharacterized hydrolase SAOUHSC_02900		catalytic activity;hydrolase activity			31.006	17	80.1	15327000000	426	+	1.59592	-0.342556	0.0220727	25.8856	25.7193	25.5175	25.8611	26.0433	26.0216	26.3212	25.9676
Q2FV40	Q2FV40	SAOUHSC_02899			catalytic activity			38.194	9	48.5	850510000	41		0.425421	-0.194748	0.306377	23.5154	23.4486	23.6492	23.1792	23.4173	24.1619	23.586	23.4063
Q2FV41	Q2FV41	SAOUHSC_02898			catalytic activity;oxidoreductase activity			24.931	3	20.9	409010000	33	+	1.34975	-0.338357	0.0370401	23.2926	22.838	22.9361	23.3265	23.37	23.3652	23.5822	23.4293
Q2FV42	Q2FV42	SAOUHSC_02897	HTH-type transcriptional regulator SAOUHSC_02897	biological regulation;biosynthetic process;cellular biosynthetic process;cellular macromolecule biosynthetic process;cellular macromolecule metabolic process;cellular metabolic process;cellular nitrogen compound metabolic process;cellular process;macromolecule biosynthetic process;macromolecule metabolic process;metabolic process;nitrogen compound metabolic process;nucleic acid metabolic process;…	binding;DNA binding;nucleic acid binding			22.26	1	9.7	2105700000	19		0.0201576	0.0691876	0.943155	24.9526	25.503	21.9705	24.7746	25.1218	24.8666	25.264	21.6715
Q2FV44	Q2FV44	SAOUHSC_02895						30.608	15	75.5	5078600000	328		0.162347	0.0281963	0.614656	25.5309	25.5156	25.5584	25.4997	25.3537	25.4487	25.665	25.5244
Q2FV48	Q2FV48	SAOUHSC_02891		biological regulation;biosynthetic process;cellular biosynthetic process;cellular macromolecule biosynthetic process;cellular macromolecule metabolic process;cellular metabolic process;cellular nitrogen compound metabolic process;cellular process;macromolecule biosynthetic process;macromolecule metabolic process;metabolic process;nitrogen compound metabolic process;nucleic acid metabolic process;…	binding;DNA binding;nucleic acid binding			21.555	3	27	1837000000	5	+	5.85863	-4.99793	0	21.1498	22.273	21.4539	21.7875	26.6527	26.9676	26.5554	26.4802
Q2FV52	Q2FV52	isaA	Probable transglycosylase IsaA		catalytic activity;hydrolase activity;hydrolase activity, acting on glycosyl bonds	extracellular region		24.203	7	36.9	61871000000	420	+	2.91426	-0.332778	0.00278599	28.7242	28.8275	28.7178	28.892	29.0721	29.2394	29.1101	29.071
Q2FV53	Q2FV53	SAOUHSC_02886			acetyltransferase activity;catalytic activity;N-acetyltransferase activity;N-acyltransferase activity;transferase activity;transferase activity, transferring acyl groups;transferase activity, transferring acyl groups other than amino-acyl groups			19.141	3	16.7	815250000	46	+	2.4568	-0.73103	0.00598936	23.388	23.4394	23.2064	23.7368	24.0512	24.3786	23.9197	24.3452
Q2FV54	Q2FV54	oatA	O-acetyltransferase OatA		catalytic activity;transferase activity;transferase activity, transferring acyl groups;transferase activity, transferring acyl groups other than amino-acyl groups	cell part;integral to membrane;intrinsic to membrane;membrane;membrane part;plasma membrane		69.098	18	29.2	6726900000	319	+	2.29514	-0.31081	0.00727628	25.038	25.103	24.9956	25.0246	25.5473	25.3323	25.2325	25.2924
Q2FV55	Q2FV55	ssaA	Staphylococcal secretory antigen SsaA	multi-organism process;pathogenesis		extracellular region		27.589	5	34.9	345430000	55	+	5.25595	-1.47666	0	22.2409	21.8525	22.1176	21.8908	23.5669	23.422	23.4726	23.547
Q2FV57	Q2FV57	crtP	Diapolycopene oxygenase	biosynthetic process;carotenoid biosynthetic process;carotenoid metabolic process;cellular biosynthetic process;cellular lipid metabolic process;cellular metabolic process;cellular process;isoprenoid biosynthetic process;isoprenoid metabolic process;lipid biosynthetic process;lipid metabolic process;metabolic process;pigment biosynthetic process;pigment metabolic process;primary metabolic process…	catalytic activity;oxidoreductase activity		Carotenoid biosynthesis	57.186	6	17.7	1008600000	19		0.81838	1.5115	0.126841	24.7348	24.8913	24.4054	24.6187	24.339	25.087	21.6827	21.4955
Q2FV58	Q2FV58	crtQ	4,4'-diaponeurosporenoate glycosyltransferase	biosynthetic process;carotenoid biosynthetic process;carotenoid metabolic process;cellular biosynthetic process;cellular lipid metabolic process;cellular metabolic process;cellular process;isoprenoid biosynthetic process;isoprenoid metabolic process;lipid biosynthetic process;lipid metabolic process;metabolic process;pigment biosynthetic process;pigment metabolic process;primary metabolic process…	catalytic activity;transferase activity;transferase activity, transferring glycosyl groups	cell part;integral to membrane;intrinsic to membrane;membrane;membrane part;plasma membrane	Carotenoid biosynthesis	42.544	3	16	356030000	3		0.663566	-0.654289	0.177439	23.891	23.8192	23.6237	22.0563	24.1756	23.8586	24.4266	23.5464
Q2FV60	Q2FV60	crtN	Dehydrosqualene desaturase	biosynthetic process;carotenoid biosynthetic process;carotenoid metabolic process;cellular biosynthetic process;cellular lipid metabolic process;cellular metabolic process;cellular process;isoprenoid biosynthetic process;isoprenoid metabolic process;lipid biosynthetic process;lipid metabolic process;metabolic process;pigment biosynthetic process;pigment metabolic process;primary metabolic process…	catalytic activity;oxidoreductase activity		Carotenoid biosynthesis	56.741	7	23.3	735630000	65	+	1.58068	-0.795143	0.0228239	21.1189	22.007	22.0392	22.1488	22.9002	22.6065	22.2813	22.7065
Q2FV61	Q2FV61	SAOUHSC_02876		biosynthetic process;metabolic process	binding;catalytic activity;cofactor binding;pyridoxal phosphate binding;transaminase activity;transferase activity;transferase activity, transferring nitrogenous groups;vitamin B6 binding;vitamin binding			42.734	10	39.3	560790000	65		0.639921	-0.58484	0.187747	21.6289	22.178	23.5381	22.4843	23.2221	22.5255	23.1909	23.2302
Q2FV62	Q2FV62	SAOUHSC_02875			binding;catalytic activity;coenzyme binding;cofactor binding;D-lactate dehydrogenase activity;lactate dehydrogenase activity;NAD binding;nucleotide binding;oxidoreductase activity;oxidoreductase activity, acting on CH-OH group of donors;oxidoreductase activity, acting on the CH-OH group of donors, NAD or NADP as acceptor		Pyruvate metabolism	37.223	17	45.8	5876300000	188		0.805067	-0.152441	0.131245	24.4794	24.6647	24.5699	24.5762	24.5337	24.8134	24.9171	24.6358
Q2FV63	Q2FV63	copZ	Copper chaperone CopZ	cation transport;establishment of localization;ion transport;metal ion transport;transport	binding;cation binding;copper ion binding;ion binding;metal ion binding;transition metal ion binding	cell part;cytoplasm;intracellular part	Mineral absorption	7.2369	6	100	2996600000	106	+	7.20654	4.21881	0	26.3414	26.8971	26.6396	26.5734	22.4399	22.2205	22.3816	22.5343
Q2FV64	Q2FV64	copA	Copper-exporting P-type ATPase A	cation transport;copper ion transport;establishment of localization;ion transport;metal ion transport;transition metal ion transport;transport	active transmembrane transporter activity;adenyl nucleotide binding;adenyl ribonucleotide binding;ATP binding;ATPase activity;ATPase activity, coupled;ATPase activity, coupled to movement of substances;ATPase activity, coupled to transmembrane movement of ions;ATPase activity, coupled to transmembrane movement of substances;binding;catalytic activity;cation binding;cation transmembrane transporte…	cell part;integral to membrane;intrinsic to membrane;membrane;membrane part;plasma membrane		86.743	54	50.7	17611000000	620	+	4.39603	6.85684	0	26.4681	26.5737	26.6653	26.633	20.8976	20.7733	18.7443	18.4976
Q2FV65	Q2FV65	SAOUHSC_02872						7.2662	2	49.2	60060000	7		1.06244	1.11724	0.0690964	22.6408	21.9721	23.0521	21.6603	21.7582	21.2552	21.899	19.9439
Q2FV66	Q2FV66	SAOUHSC_02871			acetyltransferase activity;catalytic activity;transferase activity;transferase activity, transferring acyl groups;transferase activity, transferring acyl groups other than amino-acyl groups		Aminobenzoate degradation;Benzoate degradation;Ethylbenzene degradation;Limonene and pinene degradation;Naphthalene degradation;Tyrosine metabolism	22.119	7	52.8	5828700000	132	+	2.76397	0.729558	0.00343813	26.9528	27.0513	26.7102	27.0561	25.9007	26.4096	26.2824	26.2595
Q2FV67	Q2FV67	rocA	1-pyrroline-5-carboxylate dehydrogenase	amine biosynthetic process;amine catabolic process;amine metabolic process;biosynthetic process;carboxylic acid biosynthetic process;carboxylic acid catabolic process;carboxylic acid metabolic process;catabolic process;cellular amine metabolic process;cellular amino acid biosynthetic process;cellular amino acid catabolic process;cellular amino acid metabolic process;cellular biosynthetic process;…	1-pyrroline-5-carboxylate dehydrogenase activity;catalytic activity;oxidoreductase activity;oxidoreductase activity, acting on the aldehyde or oxo group of donors;oxidoreductase activity, acting on the aldehyde or oxo group of donors, NAD or NADP as acceptor;oxidoreductase activity, acting on the CH-NH group of donors;oxidoreductase activity, acting on the CH-NH group of donors, NAD or NADP as ac…		Alanine, aspartate and glutamate metabolism;Arginine and proline metabolism	56.867	64	89.1	388550000000	2503	+	3.19478	0.601722	0.00183505	30.1685	30.5528	30.342	30.3206	29.7649	29.6238	29.8591	29.7292
Q2FV69	Q2FV69	SAOUHSC_02867		biological regulation;biosynthetic process;cellular biosynthetic process;cellular macromolecule biosynthetic process;cellular macromolecule metabolic process;cellular metabolic process;cellular nitrogen compound metabolic process;cellular process;macromolecule biosynthetic process;macromolecule metabolic process;metabolic process;nitrogen compound metabolic process;nucleic acid metabolic process;…	binding;DNA binding;nucleic acid binding			21.879	5	39.6	311280000	34		0.316667	-0.228123	0.406347	22.4003	22.6728	21.6814	22.5912	22.2225	23.0226	22.7973	22.2158
Q2FV70	Q2FV70	SAOUHSC_02866				cell part;integral to membrane;intrinsic to membrane;membrane part		90.408	10	20.4	671810000	42	+	3.28132	1.46067	0.00194536	24.7964	24.3038	24.1829	24.5163	23.1706	22.4795	23.1797	23.1269
Q2FV74	Q2FV74	clpL	ATP-dependent Clp protease ATP-binding subunit ClpL	multi-organism process;pathogenesis	adenyl nucleotide binding;adenyl ribonucleotide binding;ATP binding;binding;nucleotide binding;purine nucleotide binding;purine ribonucleoside triphosphate binding;purine ribonucleotide binding;ribonucleotide binding			77.835	58	82	51383000000	1733	+	2.61673	0.512341	0.00442296	27.1875	26.9779	27.1873	27.346	26.7036	26.4675	26.6871	26.7912
Q2FV75	Q2FV75	SAOUHSC_02861		cellular macromolecule metabolic process;cellular metabolic process;cellular nitrogen compound metabolic process;cellular process;cellular response to stimulus;cellular response to stress;DNA metabolic process;DNA repair;macromolecule metabolic process;metabolic process;nitrogen compound metabolic process;nucleic acid metabolic process;nucleobase-containing compound metabolic process;primary meta…	catalytic activity;methylated-DNA-[protein]-cysteine S-methyltransferase activity;methyltransferase activity;S-methyltransferase activity;transferase activity;transferase activity, transferring one-carbon groups			18.945	6	29.5	672500000	59		0.458077	0.252135	0.283254	22.727	23.4512	23.0453	22.8242	23.2368	22.7051	22.7799	22.3174
Q2FV76	Q2FV76	SAOUHSC_02860		biosynthetic process;cellular biosynthetic process;cellular lipid metabolic process;cellular metabolic process;cellular process;isoprenoid biosynthetic process;isoprenoid metabolic process;lipid biosynthetic process;lipid metabolic process;metabolic process;primary metabolic process	catalytic activity;hydroxymethylglutaryl-CoA synthase activity;transferase activity;transferase activity, transferring acyl groups;transferase activity, transferring acyl groups, acyl groups converted into alkyl on transfer		Butanoate metabolism;Synthesis and degradation of ketone bodies;Terpenoid backbone biosynthesis;Valine, leucine and isoleucine degradation	43.205	39	76.5	154980000000	1337	+	2.85766	0.381697	0.00323596	29.2135	29.1419	29.3597	29.3125	28.8183	28.7711	28.9507	28.9607
Q2FV77	Q2FV77	SAOUHSC_02859	3-hydroxy-3-methylglutaryl coenzyme A reductase	cellular metabolic process;cellular nitrogen compound metabolic process;cellular process;coenzyme A metabolic process;coenzyme metabolic process;cofactor metabolic process;heterocycle metabolic process;metabolic process;nitrogen compound metabolic process;nucleobase-containing compound metabolic process;nucleobase-containing small molecule metabolic process;nucleoside bisphosphate metabolic proce…	binding;catalytic activity;coenzyme binding;cofactor binding;hydroxymethylglutaryl-CoA reductase (NADPH) activity;hydroxymethylglutaryl-CoA reductase activity;oxidoreductase activity;oxidoreductase activity, acting on CH-OH group of donors;oxidoreductase activity, acting on the CH-OH group of donors, NAD or NADP as acceptor		Terpenoid backbone biosynthesis	46.236	32	69.2	34924000000	619	+	1.54706	-0.223914	0.0243558	27.346	27.3539	27.1743	27.5544	27.5679	27.572	27.5918	27.5926
Q2FV81	Q2FV81	SAOUHSC_02855			catalytic activity;hydrolase activity;hydrolase activity, acting on carbon-nitrogen (but not peptide) bonds;hydrolase activity, acting on carbon-nitrogen (but not peptide) bonds, in linear amides;N-acetylmuramoyl-L-alanine amidase activity			16.87	4	42	596910000	42	+	1.75997	-0.722195	0.0160424	21.8092	21.5516	20.9453	21.5848	22.1828	22.5072	21.9067	22.183
Q2FV83	Q2FV83	SAOUHSC_02852		biosynthetic process;cellular biosynthetic process;cellular macromolecule biosynthetic process;cellular macromolecule metabolic process;cellular metabolic process;cellular nitrogen compound metabolic process;cellular process;macromolecule biosynthetic process;macromolecule metabolic process;metabolic process;nitrogen compound metabolic process;nucleic acid metabolic process;nucleobase-containing …	binding;DNA binding;nucleic acid binding;nucleic acid binding transcription factor activity;sequence-specific DNA binding transcription factor activity			31.466	6	28	695940000	38		1.08617	-0.321425	0.0656424	22.6037	23.2627	22.6807	22.8054	23.1467	23.2775	23.1523	23.0617
Q2FV86	Q2FV86	SAOUHSC_02849			binding;catalytic activity;cation binding;coenzyme binding;cofactor binding;ion binding;magnesium ion binding;metal ion binding;oxidoreductase activity;oxidoreductase activity, acting on the aldehyde or oxo group of donors;oxidoreductase activity, acting on the aldehyde or oxo group of donors, oxygen as acceptor;pyruvate oxidase activity;thiamine pyrophosphate binding;vitamin binding		Pyruvate metabolism	63.757	21	48.2	6240500000	293	+	1.92582	0.617574	0.0120078	26.1491	25.8336	26.0039	26.2863	25.6505	25.2576	25.156	25.7386
Q2FV87	Q2FV87	glcB	Glucoside permease IIC component;Glucoside-specific phosphotransferase enzyme IIA component;Glucoside-specific phosphotransferase enzyme IIB component;PTS system glucoside-specific EIICBA component	carbohydrate transport;establishment of localization;organic substance transport;phosphoenolpyruvate-dependent sugar phosphotransferase system;transport	active transmembrane transporter activity;carbohydrate transmembrane transporter activity;catalytic activity;glucose transmembrane transporter activity;hexose transmembrane transporter activity;kinase activity;monosaccharide transmembrane transporter activity;phosphotransferase activity, alcohol group as acceptor;protein-N(PI)-phosphohistidine-sugar phosphotransferase activity;substrate-specific …	cell part;integral to membrane;intrinsic to membrane;membrane;membrane part;plasma membrane	Amino sugar and nucleotide sugar metabolism;Phosphotransferase system (PTS)	74.415	10	27.2	12665000000	233	+	1.95813	-0.478502	0.0113425	26.8563	27.0736	26.766	27.0139	27.362	27.5546	27.1092	27.5979
Q2FV88	Q2FV88	SAOUHSC_02846						15.445	4	32.4	1390600000	67	+	1.96117	0.436317	0.0112627	24.4482	24.2846	24.1001	24.2644	23.6287	23.9554	24.0429	23.725
Q2FV89	Q2FV89	SAOUHSC_02845		biological regulation;cell redox homeostasis;cellular homeostasis;cellular process;homeostatic process;regulation of biological process;regulation of biological quality;regulation of cellular process				13.215	3	44.7	593080000	49	+	2.46734	1.64112	0.00588679	22.9588	23.2768	23.279	22.9551	22.1256	20.7665	21.0334	21.9796
Q2FV90	Q2FV90	SAOUHSC_02844			catalytic activity;hydrolase activity			36.847	23	62.1	26132000000	542	+	5.14681	0.711964	0	27.0392	27.0145	26.9111	27.1195	26.3118	26.2397	26.3302	26.3547
Q2FV94	Q2FV94	SAOUHSC_02840		alcohol biosynthetic process;alcohol metabolic process;biosynthetic process;carbohydrate biosynthetic process;carbohydrate metabolic process;cellular biosynthetic process;cellular carbohydrate biosynthetic process;cellular carbohydrate metabolic process;cellular metabolic process;cellular process;gluconeogenesis;glucose metabolic process;hexose biosynthetic process;hexose metabolic process;metabo…	4 iron, 4 sulfur cluster binding;ammonia-lyase activity;binding;carbon-nitrogen lyase activity;catalytic activity;iron-sulfur cluster binding;L-serine ammonia-lyase activity;lyase activity;metal cluster binding		Cysteine and methionine metabolism;Glycine, serine and threonine metabolism	24.558	11	48.7	2781600000	109	+	2.42396	-1.12347	0.006	24.3896	24.8037	24.4486	24.7422	25.8698	25.8097	26.1156	25.0829
Q2FV95	Q2FV95	SAOUHSC_02839		alcohol biosynthetic process;alcohol metabolic process;biosynthetic process;carbohydrate biosynthetic process;carbohydrate metabolic process;cellular biosynthetic process;cellular carbohydrate biosynthetic process;cellular carbohydrate metabolic process;cellular metabolic process;cellular process;gluconeogenesis;glucose metabolic process;hexose biosynthetic process;hexose metabolic process;metabo…	ammonia-lyase activity;carbon-nitrogen lyase activity;catalytic activity;L-serine ammonia-lyase activity;lyase activity		Cysteine and methionine metabolism;Glycine, serine and threonine metabolism	30.971	13	44.1	5126700000	177	+	2.66413	-1.49362	0.00397484	25.4247	25.4999	25.3747	25.3748	27.1176	26.9436	27.4782	26.109
Q2FV99	Q2FV99	SAOUHSC_02834						23.541	13	60.7	8713800000	313		1.02847	0.157622	0.0776267	26.489	26.4557	26.6182	26.5225	26.2101	26.309	26.546	26.3898
Q2FVA2	Q2FVA2	SAOUHSC_02831			catalytic activity;hydrolase activity			30.566	23	92.5	19239000000	350	+	1.2703	0.236195	0.0434572	28.0879	28.2716	28.2971	28.3613	27.8246	28.0842	27.9694	28.1949
Q2FVA3	Q2FVA3	SAOUHSC_02830			binding;catalytic activity;coenzyme binding;cofactor binding;D-lactate dehydrogenase activity;lactate dehydrogenase activity;NAD binding;nucleotide binding;oxidoreductase activity;oxidoreductase activity, acting on CH-OH group of donors;oxidoreductase activity, acting on the CH-OH group of donors, NAD or NADP as acceptor		Pyruvate metabolism	34.803	19	47.3	8090400000	215	+	2.96157	1.24089	0.00230204	26.1563	26.1207	26.1577	26.0901	24.4023	25.3118	24.6816	25.1656
Q2FVA4	Q2FVA4	SAOUHSC_02829	Putative NAD(P)H nitroreductase SAOUHSC_02829		catalytic activity;oxidoreductase activity			25.388	17	60.5	10379000000	325	+	4.80469	1.16465	0	26.5793	26.6634	26.607	26.8059	25.4385	25.3071	25.6364	25.615
Q2FVA5	Q2FVA5	SAOUHSC_02828						30.059	8	56	451370000	37		0.540543	0.669824	0.236782	23.1324	21.5048	23.9206	22.823	22.7782	21.6774	21.7291	22.5168
Q2FVA6	Q2FVA6	SAOUHSC_02827			acetyltransferase activity;catalytic activity;N-acetyltransferase activity;N-acyltransferase activity;transferase activity;transferase activity, transferring acyl groups;transferase activity, transferring acyl groups other than amino-acyl groups			10.548	13	98.9	27070000000	396		0.477602	0.101907	0.27197	27.2918	27.305	27.1476	27.4685	27.3575	27.0778	27.2865	27.0835
Q2FVA7	Q2FVA7	SAOUHSC_02826		biosynthetic process;cellular biosynthetic process;cellular macromolecule biosynthetic process;cellular macromolecule metabolic process;cellular metabolic process;cellular nitrogen compound metabolic process;cellular process;macromolecule biosynthetic process;macromolecule metabolic process;metabolic process;nitrogen compound metabolic process;nucleic acid metabolic process;nucleobase-containing …	binding;DNA binding;nucleic acid binding;nucleic acid binding transcription factor activity;sequence-specific DNA binding transcription factor activity	cell part;intracellular		16.516	7	54.9	2292400000	98		0.543622	0.113861	0.234975	24.629	24.4625	24.4234	24.6733	24.3656	24.3434	24.3645	24.6591
Q2FVA9	Q2FVA9	SAOUHSC_02824						21.792	1	14.2	135910000	25		0.0746193	0.101417	0.798425	22.4016	22.8175	21.847	22.6878	22.7666	22.6892	22.8634	21.029
Q2FVB2	Q2FVB2	fbp	Fructose-1,6-bisphosphatase class 3	alcohol biosynthetic process;alcohol metabolic process;biosynthetic process;carbohydrate biosynthetic process;carbohydrate metabolic process;cellular biosynthetic process;cellular carbohydrate biosynthetic process;cellular carbohydrate metabolic process;cellular metabolic process;cellular process;gluconeogenesis;glucose metabolic process;hexose biosynthetic process;hexose metabolic process;metabo…	carbohydrate phosphatase activity;catalytic activity;fructose 1,6-bisphosphate 1-phosphatase activity;hydrolase activity;hydrolase activity, acting on ester bonds;phosphatase activity;phosphoric ester hydrolase activity;sugar-phosphatase activity		Carbon fixation in photosynthetic organisms;Fructose and mannose metabolism;Glycolysis / Gluconeogenesis;Pentose phosphate pathway	76.174	55	70.6	58832000000	1101	+	3.51636	0.661502	0.00112752	27.263	27.2255	27.2644	27.3719	26.831	26.4657	26.6717	26.5103
Q2FVB4	Q2FVB4	SAOUHSC_02820			adenyl nucleotide binding;adenyl ribonucleotide binding;ATP binding;ATPase activity;binding;catalytic activity;hydrolase activity;hydrolase activity, acting on acid anhydrides;hydrolase activity, acting on acid anhydrides, in phosphorus-containing anhydrides;nucleoside-triphosphatase activity;nucleotide binding;purine nucleotide binding;purine ribonucleoside triphosphate binding;purine ribonucleo…			25.804	37	100	47873000000	840		0.0594626	0.0536304	0.836644	26.4874	26.7331	26.6905	27.2061	26.2768	26.6027	26.4804	27.5427
Q2FVB5	Q2FVB5	SAOUHSC_02819		biosynthetic process;cellular biosynthetic process;cellular macromolecule biosynthetic process;cellular macromolecule metabolic process;cellular metabolic process;cellular nitrogen compound metabolic process;cellular process;macromolecule biosynthetic process;macromolecule metabolic process;metabolic process;nitrogen compound metabolic process;nucleic acid metabolic process;nucleobase-containing …	binding;DNA binding;nucleic acid binding;nucleic acid binding transcription factor activity;sequence-specific DNA binding transcription factor activity	cell part;intracellular		18.079	4	44.7	3478500000	71		0.509492	-0.334041	0.253495	25.8398	25.7141	25.7211	25.7047	25.2877	26.7108	26.0242	26.2931
Q2FVB9	Q2FVB9	SAOUHSC_02815		cellular process;establishment of localization;transmembrane transport;transport	transporter activity	cell part;integral to membrane;intrinsic to membrane;membrane part		47.626	2	12.7	3229600000	45		1.1742	-0.452747	0.0542062	25.6475	26.1098	25.8944	26.2966	26.0614	26.6202	26.3614	26.7163
Q2FVC1	Q2FVC1	pgcA	Phosphoglucomutase	alcohol metabolic process;biosynthetic process;carbohydrate biosynthetic process;carbohydrate metabolic process;cellular biosynthetic process;cellular carbohydrate biosynthetic process;cellular carbohydrate metabolic process;cellular macromolecule biosynthetic process;cellular macromolecule metabolic process;cellular metabolic process;cellular polysaccharide biosynthetic process;cellular polysacc…	binding;catalytic activity;cation binding;intramolecular transferase activity;intramolecular transferase activity, phosphotransferases;ion binding;isomerase activity;magnesium ion binding;metal ion binding;phosphoglucomutase activity		Amino sugar and nucleotide sugar metabolism;Fructose and mannose metabolism	62.376	44	70.8	18162000000	751	+	4.80916	0.579005	0	25.9518	25.8141	25.8401	25.98	25.3546	25.2599	25.3111	25.3444
Q2FVC2	Q2FVC2	SAOUHSC_02791			catalytic activity;hydrolase activity			14.894	8	68.5	2907600000	66		0.156053	0.0409708	0.626678	25.4972	25.3021	25.2591	25.2322	25.1638	25.388	25.1243	25.4506
Q2FVC3	Q2FVC3	SAOUHSC_02790			adenyl nucleotide binding;adenyl ribonucleotide binding;ATP binding;binding;catalytic activity;DNA binding;hydrolase activity;nucleic acid binding;nucleotide binding;purine nucleotide binding;purine ribonucleoside triphosphate binding;purine ribonucleotide binding;ribonucleotide binding			109.9	46	57.3	8358800000	500		0.417043	-0.0963254	0.311161	24.3399	24.3214	24.3239	24.3288	24.3649	24.3705	24.245	24.7189
Q2FVC4	Q2FVC4	SAOUHSC_02789	Uncharacterized lipoprotein SAOUHSC_02789			cell part;membrane;plasma membrane		30.31	4	17.1	223200000	15		0.782081	-1.15465	0.136116	22.0817	19.6305	22.4313	22.7693	22.5654	23.1355	23.1776	22.653
Q2FVC5	Q2FVC5	SAOUHSC_02788	Uncharacterized lipoprotein SAOUHSC_02788			cell part;membrane;plasma membrane		30.325	5	22.2	277600000	30		1.20438	-1.02484	0.0512132	21.5619	20.4051	22.1484	21.5189	22.8942	22.0483	21.9146	22.8766
Q2FVD4	Q2FVD4	SAOUHSC_02779						11.173	5	54.8	3739700000	39		0.657462	0.206995	0.179581	26.1433	26.0064	25.9908	25.8634	25.4662	25.6718	26.0947	25.9432
Q2FVD5	Q2FVD5	SAOUHSC_02778	Uncharacterized oxidoreductase SAOUHSC_02778		catalytic activity;oxidoreductase activity			24.604	24	91.8	37988000000	616	+	4.90144	1.11583	0	28.1775	28.0694	28.3254	28.0734	27.0338	26.8784	27.1496	27.1206
Q2FVE0	Q2FVE0	SAOUHSC_02774	Alkyl hydroperoxide reductase AhpD		antioxidant activity;catalytic activity;oxidoreductase activity;oxidoreductase activity, acting on paired donors, with incorporation or reduction of molecular oxygen;oxidoreductase activity, acting on peroxide as acceptor;peroxidase activity;peroxiredoxin activity			16.484	4	27.9	774190000	6		0.0200329	-0.0543604	0.943168	24.8457	22.0037	24.944	23.0373	23.0456	24.9102	24.5731	22.5192
Q2FVE7	Q2FVE7	SAOUHSC_02767		cation transport;cellular process;establishment of localization;ion transport;metal ion transport;nickel ion transport;transition metal ion transport;transmembrane transport;transport	binding;cation binding;heme binding;ion binding;iron ion binding;metal ion binding;nickel ion binding;tetrapyrrole binding;transition metal ion binding	ATP-binding cassette (ABC) transporter complex;cell part;macromolecular complex;membrane part;protein complex	ABC transporters	60.076	44	75.6	31473000000	1081	+	1.70407	0.5281	0.0168456	26.2668	26.4378	26.5754	26.8598	25.9521	25.8768	25.8633	26.3353
Q2FVF0	Q2FVF0	SAOUHSC_02764			adenyl nucleotide binding;adenyl ribonucleotide binding;ATP binding;ATPase activity;binding;catalytic activity;hydrolase activity;hydrolase activity, acting on acid anhydrides;hydrolase activity, acting on acid anhydrides, in phosphorus-containing anhydrides;nucleoside-triphosphatase activity;nucleotide binding;purine nucleotide binding;purine ribonucleoside triphosphate binding;purine ribonucleo…		ABC transporters	30.468	3	18.5	523040000	42		0.307914	-0.136299	0.417131	23.4649	22.9487	22.8235	23.4656	23.1376	23.375	23.4961	23.2392
Q2FVF1	Q2FVF1	SAOUHSC_02763			adenyl nucleotide binding;adenyl ribonucleotide binding;ATP binding;ATPase activity;binding;catalytic activity;hydrolase activity;hydrolase activity, acting on acid anhydrides;hydrolase activity, acting on acid anhydrides, in phosphorus-containing anhydrides;nucleoside-triphosphatase activity;nucleotide binding;purine nucleotide binding;purine ribonucleoside triphosphate binding;purine ribonucleo…		ABC transporters	28.179	2	15.7	69189000	4		0.406743	0.488339	0.319728	21.2968	21.2712	21.5146	21.768	21.2444	21.47	19.4529	21.73
Q2FVF4	Q2FVF4	SAOUHSC_02760		amine biosynthetic process;amine metabolic process;biosynthetic process;carboxylic acid biosynthetic process;carboxylic acid metabolic process;cellular amine metabolic process;cellular amino acid biosynthetic process;cellular amino acid metabolic process;cellular biosynthetic process;cellular ketone metabolic process;cellular metabolic process;cellular nitrogen compound biosynthetic process;cellu…	catalytic activity;glutamate synthase (NADPH) activity;glutamate synthase activity;glutamate synthase activity, NADH or NADPH as acceptor;oxidoreductase activity;oxidoreductase activity, acting on the CH-NH2 group of donors;oxidoreductase activity, acting on the CH-NH2 group of donors, NAD or NADP as acceptor			58.439	32	62.7	7492900000	374	+	3.2142	0.303164	0.00184456	24.946	24.8937	24.9429	24.9462	24.5757	24.5699	24.6107	24.7599
Q2FVF5	Q2FVF5	SAOUHSC_02759						17.311	16	71.5	19635000000	496		0.816938	-0.142114	0.127462	25.9306	26.0777	26.1134	26.0207	26.3501	26.2653	26.0443	26.0511
Q2FVF7	Q2FVF7	SAOUHSC_02757						9.7746	7	100	1940400000	143		1.02517	-0.209279	0.0783015	23.5926	23.6168	23.7932	23.6172	23.5826	23.9425	23.9919	23.94
Q2FVF9	Q2FVF9	SAOUHSC_02755						39.192	21	57.5	20279000000	501	+	2.82739	0.325689	0.00335018	26.5732	26.6181	26.5303	26.6725	26.2905	26.2444	26.3996	26.1568
Q2FVG3	Q2FVG3	SAOUHSC_02751	Carboxylic ester hydrolase		catalytic activity;hydrolase activity		Drug metabolism - other enzymes	51.968	8	28.7	4344700000	157		0.46664	0.160165	0.278332	24.5179	24.0956	24.4784	24.1121	24.443	24.083	24.0807	23.9566
Q2FVG5	Q2FVG5	SAOUHSC_02747						23.8	12	59.3	4050500000	265	+	1.28895	0.225227	0.0418264	24.9947	24.7345	25.0879	24.9142	24.8157	24.6296	24.7863	24.5987
Q2FVG8	Q2FVG8	SAOUHSC_02744		amine transport;amino acid transport;betaine transport;carboxylic acid transport;cation transport;establishment of localization;glycine betaine transport;ion transport;modified amino acid transport;nitrogen compound transport;organic acid transport;organic cation transport;organic substance transport;quaternary ammonium group transport;transport	adenyl nucleotide binding;adenyl ribonucleotide binding;ATP binding;ATPase activity;binding;catalytic activity;hydrolase activity;hydrolase activity, acting on acid anhydrides;hydrolase activity, acting on acid anhydrides, in phosphorus-containing anhydrides;nucleoside-triphosphatase activity;nucleotide binding;purine nucleotide binding;purine ribonucleoside triphosphate binding;purine ribonucleo…	cell part;membrane	ABC transporters	46.173	20	65.9	10867000000	310		0.30133	0.108286	0.422442	25.8984	25.7728	25.5182	25.726	25.6301	25.5033	25.9728	25.3759
Q2FVH0	Q2FVH0	SAOUHSC_02742			transporter activity		ABC transporters	34.813	15	61.7	1759500000	103		0.602491	0.660601	0.203225	24.2217	24.1145	24.143	24.0418	24.3344	23.5582	23.9929	21.9932
Q2FVH1	Q2FVH1	SAOUHSC_02741		establishment of localization;transport		cell part;integral to membrane;intrinsic to membrane;membrane;membrane part;plasma membrane	ABC transporters	25.026	3	16.9	182850000	21		0.0611005	0.106523	0.832179	22.4471	22.5539	20.4272	22.4776	22.5893	20.9557	21.9476	21.9871
Q2FVH3	Q2FVH3	SAOUHSC_02739	2-dehydropantoate 2-reductase	amine biosynthetic process;amine metabolic process;biosynthetic process;carboxylic acid biosynthetic process;carboxylic acid metabolic process;cellular amine metabolic process;cellular amino acid biosynthetic process;cellular amino acid metabolic process;cellular biosynthetic process;cellular ketone metabolic process;cellular metabolic process;cellular modified amino acid biosynthetic process;cel…	2-dehydropantoate 2-reductase activity;binding;catalytic activity;coenzyme binding;cofactor binding;NADP binding;nucleotide binding;oxidoreductase activity;oxidoreductase activity, acting on CH-OH group of donors;oxidoreductase activity, acting on the CH-OH group of donors, NAD or NADP as acceptor	cell part;cytoplasm;intracellular part	Pantothenate and CoA biosynthesis	34.444	14	44.7	2442600000	173	+	2.65779	-0.259788	0.00393769	23.8337	23.8406	24.0109	23.9107	24.2254	24.0867	24.1387	24.1843
Q2FVH5	Q2FVH5	SAOUHSC_02737			binding;catalytic activity;coenzyme binding;cofactor binding			31.192	13	38.5	3825300000	239		0.00427614	0.000928879	0.989421	25.0456	25.0081	24.9522	25.0115	25.193	24.9208	25.0214	24.8785
Q2FVH6	Q2FVH6	flp	Protein flp			cell part;integral to membrane;intrinsic to membrane;membrane;membrane part;plasma membrane		56.448	6	15.3	227150000	52	+	1.55303	0.320488	0.0240677	21.5517	21.6929	21.8189	21.3875	21.2278	21.3847	21.152	21.4045
Q2FVH8	Q2FVH8	SAOUHSC_02733			active transmembrane transporter activity;amine transmembrane transporter activity;amino acid transmembrane transporter activity;carboxylic acid transmembrane transporter activity;organic acid transmembrane transporter activity;substrate-specific transmembrane transporter activity;substrate-specific transporter activity;transmembrane transporter activity;transporter activity	cell part;integral to membrane;intrinsic to membrane;membrane part		67.572	6	7.7	536150000	80		0.372206	0.128999	0.347456	22.9987	22.5961	22.9681	22.9665	22.8646	22.6566	22.4813	23.011
Q2FVI0	Q2FVI0	SAOUHSC_02731			active transmembrane transporter activity;antiporter activity;cation transmembrane transporter activity;hydrogen ion transmembrane transporter activity;inorganic cation transmembrane transporter activity;ion transmembrane transporter activity;monovalent inorganic cation transmembrane transporter activity;secondary active transmembrane transporter activity;solute:cation antiporter activity;solute:…	cell part;integral to membrane;intrinsic to membrane;membrane part		79.339	8	8.1	818490000	54		0.133053	-0.0716314	0.670863	23.6568	23.3329	23.1424	23.5212	23.215	23.9586	23.2708	23.4953
Q2FVI1	Q2FVI1	SAOUHSC_02729			active transmembrane transporter activity;amine transmembrane transporter activity;amino acid transmembrane transporter activity;carboxylic acid transmembrane transporter activity;organic acid transmembrane transporter activity;substrate-specific transmembrane transporter activity;substrate-specific transporter activity;transmembrane transporter activity;transporter activity	cell part;integral to membrane;intrinsic to membrane;membrane part		52.558	2	5.3	267690000	33	+	3.90233	1.08502	0.000587156	22.5905	22.9413	22.9395	22.6791	21.76	21.726	21.8634	21.4608
Q2FVI3	Q2FVI3	SAOUHSC_02727						22.28	7	44.4	1085400000	74	+	1.38232	0.656137	0.0342429	23.9394	23.5593	23.5034	23.8613	23.5068	23.0316	22.4357	23.2647
Q2FVI6	Q2FVI6	SAOUHSC_02724						25.799	21	79.5	3865500000	183	+	3.21437	3.32005	0.00185417	25.773	25.3565	26.1984	25.6924	21.6268	23.011	21.6237	23.4785
Q2FVI7	Q2FVI7	SAOUHSC_02723		cellular metabolic process;cellular process;metabolic process;organic acid metabolic process;organic acid phosphorylation;phosphate-containing compound metabolic process;phosphorus metabolic process;phosphorylation;small molecule metabolic process	catalytic activity;glycerate kinase activity;kinase activity;phosphotransferase activity, alcohol group as acceptor;transferase activity;transferase activity, transferring phosphorus-containing groups		Glycerolipid metabolism;Glycine, serine and threonine metabolism;Glyoxylate and dicarboxylate metabolism;Methane metabolism	40.66	8	30.3	2613200000	106	+	1.74823	0.398856	0.0162852	24.3544	24.4069	24.3831	24.1227	23.7743	24.1108	23.7035	24.0831
Q2FVK1	Q2FVK1	hlgB	Gamma-hemolysin component B	cell killing;cytolysis in other organism;hemolysis in other organism;killing of cells of other organism;multi-organism process;pathogenesis		extracellular region	Staphylococcus aureus infection	36.711	24	72.3	3722500000	204		0.137274	0.158779	0.662855	21.9691	21.2538	21.0282	21.971	20.4921	21.305	22.2548	21.5351
Q2FVK2	Q2FVK2	hlgC	Gamma-hemolysin component C	cell killing;cytolysis in other organism;hemolysis in other organism;killing of cells of other organism;multi-organism process;pathogenesis		extracellular region	Staphylococcus aureus infection	35.613	20	59	4576100000	216		0.378774	-0.391148	0.342294	23.2605	22.6648	23.1001	24.5873	23.4909	23.4961	24.1567	24.0336
Q2FVK3	Q2FVK3	SAOUHSC_02708		cell killing;cytolysis in other organism;killing of cells of other organism;multi-organism process;pathogenesis		extracellular region	Staphylococcus aureus infection	34.955	16	69.9	2552700000	167		0.146338	0.227226	0.645917	21.532	21.6148	21.7868	22.424	22.5944	22.3344	20.1416	21.3783
Q2FVK5	Q2FVK5	sbi	Immunoglobulin-binding protein sbi	multi-organism process;pathogenesis		extracellular region	Staphylococcus aureus infection	50.07	48	80.3	45475000000	1016	+	3.05498	-1.2339	0.00194783	25.7269	26.0343	25.4585	26.0539	27.0481	26.9748	26.746	27.4403
Q2FVK7	Q2FVK7	SAOUHSC_02704			cation transmembrane transporter activity;ion transmembrane transporter activity;substrate-specific transmembrane transporter activity;substrate-specific transporter activity;transmembrane transporter activity;transporter activity	cell part;integral to membrane;intrinsic to membrane;membrane;membrane part;plasma membrane		31.581	2	9	517030000	15		0.0709037	-0.197853	0.808064	24.8575	24.2569	22.5285	24.568	24.7256	21.7433	25.4813	25.0521
Q2FVK8	Q2FVK8	gpmA	2,3-bisphosphoglycerate-dependent phosphoglycerate mutase	alcohol catabolic process;alcohol metabolic process;carbohydrate catabolic process;carbohydrate metabolic process;catabolic process;cellular carbohydrate catabolic process;cellular carbohydrate metabolic process;cellular metabolic process;cellular process;generation of precursor metabolites and energy;glucose catabolic process;glucose metabolic process;glycolysis;hexose catabolic process;hexose m…	2,3-bisphosphoglycerate-dependent phosphoglycerate mutase activity;catalytic activity;intramolecular transferase activity;intramolecular transferase activity, phosphotransferases;isomerase activity;phosphoglycerate mutase activity		Glycolysis / Gluconeogenesis;Methane metabolism	26.68	26	96.1	127730000000	979		0.68867	-0.129283	0.169274	30.4414	30.1561	30.3983	30.3449	30.4649	30.3304	30.6426	30.4198
Q2FVL2	Q2FVL2	SAOUHSC_02699						28.904	26	78.8	30526000000	656		1.16034	-0.183309	0.0558915	26.8532	26.937	27.031	27.103	27.0867	27.0758	27.1494	27.3454
Q2FVL3	Q2FVL3	SAOUHSC_02698			transporter activity	cell part;integral to membrane;intrinsic to membrane;membrane;membrane part;plasma membrane		26.442	3	14.6	185090000	3	+	2.11996	-0.293598	0.00792258	22.2905	22.4883	22.4036	22.4689	22.6001	22.6811	22.6674	22.8771
Q2FVL4	Q2FVL4	SAOUHSC_02697			active transmembrane transporter activity;adenyl nucleotide binding;adenyl ribonucleotide binding;amine transmembrane transporter activity;amine-transporting ATPase activity;amino acid transmembrane transporter activity;amino acid-transporting ATPase activity;ATP binding;ATPase activity;ATPase activity, coupled;ATPase activity, coupled to movement of substances;ATPase activity, coupled to transme…			27.241	17	79.4	4253600000	231		0.87994	-0.251219	0.109882	24.1752	24.8042	24.3325	24.5659	24.6149	24.6989	24.7487	24.8202
Q2FVL5	Q2FVL5	SAOUHSC_02696		amine metabolic process;aminoglycan biosynthetic process;aminoglycan metabolic process;biosynthetic process;carbohydrate biosynthetic process;carbohydrate metabolic process;cell wall macromolecule biosynthetic process;cell wall macromolecule metabolic process;cell wall organization or biogenesis;cellular biosynthetic process;cellular cell wall macromolecule metabolic process;cellular cell wall or…	binding;catalytic activity;nucleotide binding;transferase activity;transferase activity, transferring acyl groups;transferase activity, transferring amino-acyl groups			48.924	5	22.1	240840000	26		0.649294	0.666684	0.183067	22.0372	22.1222	20.7749	22.8092	20.5386	21.6716	21.4209	21.4456
Q2FVL6	Q2FVL6	SAOUHSC_02695						13.798	4	51.7	598570000	59		0.157153	-0.104116	0.624306	23.728	23.8069	23.3465	23.5672	23.6664	24.2962	23.1576	23.7448
Q2FVL7	Q2FVL7	SAOUHSC_02694						23.061	7	47.7	2996300000	134		0.981039	0.175678	0.0873935	24.8885	24.9559	24.9391	24.8783	24.8317	24.8171	24.4704	24.8399
Q2FVL8	Q2FVL8	SAOUHSC_02684		metabolic process;nitrate assimilation;nitrate metabolic process;nitrogen compound metabolic process;nitrogen cycle metabolic process	4 iron, 4 sulfur cluster binding;binding;catalytic activity;cation binding;coenzyme binding;cofactor binding;flavin adenine dinucleotide binding;heme binding;ion binding;iron ion binding;iron-sulfur cluster binding;metal cluster binding;metal ion binding;NADP binding;nitrite reductase [NAD(P)H] activity;nucleotide binding;oxidoreductase activity;oxidoreductase activity, acting on other nitrogenou…		Nitrogen metabolism	88.656	48	60.5	38162000000	905	+	1.44693	0.465337	0.0297945	27.8689	27.2824	27.2389	27.7914	26.9864	27.0197	27.1084	27.2058
Q2FVL9	Q2FVL9	SAOUHSC_02683		metabolic process;nitrate assimilation;nitrate metabolic process;nitrogen compound metabolic process;nitrogen cycle metabolic process	2 iron, 2 sulfur cluster binding;binding;catalytic activity;iron-sulfur cluster binding;metal cluster binding;nitrite reductase [NAD(P)H] activity;oxidoreductase activity;oxidoreductase activity, acting on other nitrogenous compounds as donors;oxidoreductase activity, acting on other nitrogenous compounds as donors, with NAD or NADP as acceptor		Nitrogen metabolism	11.437	6	54.8	2334900000	125	+	1.88155	0.508169	0.0132279	25.4133	24.9031	25.0635	25.2953	24.6343	24.8066	24.4147	24.7867
Q2FVM0	Q2FVM0	SAOUHSC_02682		biosynthetic process;cellular biosynthetic process;cellular metabolic process;cellular nitrogen compound biosynthetic process;cellular nitrogen compound metabolic process;cellular process;cofactor biosynthetic process;cofactor metabolic process;heterocycle biosynthetic process;heterocycle metabolic process;metabolic process;nitrogen compound metabolic process;porphyrin-containing compound biosynt…	catalytic activity;C-methyltransferase activity;methyltransferase activity;oxidoreductase activity;oxidoreductase activity, acting on the CH-CH group of donors;oxidoreductase activity, acting on the CH-CH group of donors, NAD or NADP as acceptor;precorrin-2 dehydrogenase activity;S-adenosylmethionine-dependent methyltransferase activity;transferase activity;transferase activity, transferring one-…		Porphyrin and chlorophyll metabolism	36.347	4	22.2	514920000	22	+	2.39189	1.14055	0.00610687	24.5412	23.6699	23.7702	24.4651	22.6801	22.9601	23.2105	23.0335
Q2FVM1	Q2FVM1	SAOUHSC_02681		metabolic process;nitrate metabolic process;nitrogen compound metabolic process	4 iron, 4 sulfur cluster binding;binding;catalytic activity;cation binding;electron carrier activity;ion binding;iron-sulfur cluster binding;metal cluster binding;metal ion binding;molybdenum ion binding;nitrate reductase activity;oxidoreductase activity;oxidoreductase activity, acting on other nitrogenous compounds as donors;transition metal ion binding	cell part;macromolecular complex;nitrate reductase complex;protein complex	Nitrogen metabolism;Two-component system	139.83	73	64.1	31902000000	1184	+	1.52207	0.546459	0.0258973	26.7004	26.255	26.1069	26.8025	25.9673	25.9271	25.6657	26.119
Q2FVM2	Q2FVM2	SAOUHSC_02680		metabolic process;nitrate metabolic process;nitrogen compound metabolic process	binding;catalytic activity;iron-sulfur cluster binding;metal cluster binding;nitrate reductase activity;oxidoreductase activity;oxidoreductase activity, acting on other nitrogenous compounds as donors	cell part;macromolecular complex;nitrate reductase complex;protein complex	Nitrogen metabolism;Two-component system	55.219	13	32.4	7443200000	283	+	1.84542	0.598879	0.0136431	26.7327	26.2827	26.3191	26.9103	25.9183	25.9378	25.8002	26.1932
Q2FVM3	Q2FVM3	SAOUHSC_02679		cellular component assembly;cellular component assembly at cellular level;cellular component organization;cellular component organization at cellular level;cellular component organization or biogenesis;cellular component organization or biogenesis at cellular level;cellular macromolecular complex assembly;cellular macromolecular complex subunit organization;cellular process;cellular protein compl…			Nitrogen metabolism;Two-component system	22.925	1	10.2	133120000	3	+	1.24146	1.21014	0.0466909	23.0088	23.0885	22.8622	23.8849	22.1398	22.7448	22.4536	20.6657
Q2FVM4	Q2FVM4	SAOUHSC_02678			catalytic activity;nitrate reductase activity;oxidoreductase activity;oxidoreductase activity, acting on other nitrogenous compounds as donors	cell part;macromolecular complex;nitrate reductase complex;protein complex	Nitrogen metabolism;Two-component system	26.145	2	13.8	43774000	5		0.334743	0.364645	0.386381	22.3797	21.2759	21.316	22.2964	20.9209	20.8575	22.3566	21.6745
Q2FVM5	Q2FVM5	SAOUHSC_02677					Two-component system	17.15	6	30	538640000	39		0.249373	-0.107733	0.484786	22.3433	22.2928	21.7913	22.0809	22.4927	22.1146	21.9507	22.3811
Q2FVM6	Q2FVM6	nreB	Oxygen sensor histidine kinase NreB		4 iron, 4 sulfur cluster binding;adenyl nucleotide binding;adenyl ribonucleotide binding;ATP binding;binding;catalytic activity;cation binding;ion binding;iron ion binding;iron-sulfur cluster binding;kinase activity;metal cluster binding;metal ion binding;molecular transducer activity;nucleotide binding;phosphotransferase activity, alcohol group as acceptor;phosphotransferase activity, nitrogenou…	cell part;cytoplasm;integral to membrane;intracellular part;intrinsic to membrane;membrane part	Two-component system	39.12	5	28.8	552900000	31		0.437335	-0.681323	0.297818	23.1418	22.1903	20.8778	23.5173	22.4869	23.3084	24.0807	22.5764
Q2FVM7	Q2FVM7	nreC	Oxygen regulatory protein NreC	biological regulation;biosynthetic process;cellular biosynthetic process;cellular macromolecule biosynthetic process;cellular macromolecule metabolic process;cellular metabolic process;cellular nitrogen compound metabolic process;cellular process;cellular response to stimulus;macromolecule biosynthetic process;macromolecule metabolic process;metabolic process;nitrogen compound metabolic process;n…	binding;DNA binding;nucleic acid binding;nucleic acid binding transcription factor activity;sequence-specific DNA binding transcription factor activity	cell part;cytoplasm;intracellular part	Two-component system	24.368	13	60.8	2520700000	103		0.134519	0.0265808	0.668472	23.8475	23.8897	23.9051	24.082	23.7863	23.8689	24.0424	23.9203
Q2FVN1	Q2FVN1	narT	Probable nitrate transporter NarT	cellular process;establishment of localization;metabolic process;nitrate assimilation;nitrate metabolic process;nitrogen compound metabolic process;nitrogen cycle metabolic process;transmembrane transport;transport		cell part;integral to membrane;intrinsic to membrane;membrane;membrane part;plasma membrane	Two-component system	42.148	3	6.2	478960000	38		0.0506865	0.0566406	0.861124	24.3019	23.4767	23.9077	23.8159	23.4509	24.1966	23.0329	24.5951
Q2FVN2	Q2FVN2	SAOUHSC_02670						16.305	8	45.1	6365800000	117	+	3.49143	1.60534	0.00141772	27.0564	26.9232	27.655	26.8397	25.731	25.3785	25.2543	25.6891
Q2FVN3	Q2FVN3	sarZ	HTH-type transcriptional regulator SarZ	biosynthetic process;cellular biosynthetic process;cellular macromolecule biosynthetic process;cellular macromolecule metabolic process;cellular metabolic process;cellular nitrogen compound metabolic process;cellular process;macromolecule biosynthetic process;macromolecule metabolic process;metabolic process;multi-organism process;nitrogen compound metabolic process;nucleic acid metabolic process…	binding;DNA binding;nucleic acid binding;nucleic acid binding transcription factor activity;sequence-specific DNA binding transcription factor activity	cell part;cytoplasm;intracellular part		17.435	12	56.1	4412300000	176	+	4.24872	-1.4744	0	23.7368	24.0293	23.7456	24.1005	25.3038	25.424	25.1236	25.6585
Q2FVN4	Q2FVN4	SAOUHSC_02668						14.007	9	58.7	3413400000	157		0.990926	0.17664	0.0851704	24.668	24.9734	25.0105	24.9056	24.8007	24.7799	24.687	24.5832
Q2FVN5	Q2FVN5	SAOUHSC_02667			active transmembrane transporter activity;anion transmembrane transporter activity;anion:cation symporter activity;carboxylic acid transmembrane transporter activity;cation transmembrane transporter activity;dicarboxylic acid transmembrane transporter activity;inorganic cation transmembrane transporter activity;ion transmembrane transporter activity;metal ion transmembrane transporter activity;mo…	cell part;integral to membrane;intrinsic to membrane;membrane part		46.068	4	10.6	446860000	4	+	1.28322	-0.378309	0.0421379	22.4051	22.4673	22.6688	22.8305	23.1677	23.0318	22.6131	23.0723
Q2FVN6	Q2FVN6	SAOUHSC_02666						13.34	18	71.2	49445000000	686		0.725679	0.0937867	0.155914	27.6349	27.6335	27.7184	27.6758	27.5983	27.7272	27.5097	27.4523
Q2FVN7	Q2FVN7	SAOUHSC_02665			binding;catalytic activity;coenzyme binding;cofactor binding;FMN binding;nucleotide binding;oxidoreductase activity;oxidoreductase activity, acting on the CH-NH2 group of donors;oxidoreductase activity, acting on the CH-NH2 group of donors, oxygen as acceptor;pyridoxamine-phosphate oxidase activity			15.914	11	69.3	17031000000	318	+	2.40149	-0.438403	0.00618557	27.0664	26.9472	27.2112	27.2211	27.6033	27.4913	27.7183	27.3867
Q2FVN8	Q2FVN8	SAOUHSC_02664		biosynthetic process;cellular biosynthetic process;cellular macromolecule biosynthetic process;cellular macromolecule metabolic process;cellular metabolic process;cellular nitrogen compound metabolic process;cellular process;macromolecule biosynthetic process;macromolecule metabolic process;metabolic process;nitrogen compound metabolic process;nucleic acid metabolic process;nucleobase-containing …	binding;DNA binding;nucleic acid binding;nucleic acid binding transcription factor activity;sequence-specific DNA binding;sequence-specific DNA binding transcription factor activity			81.881	3	6.3	755870000	5	+	2.53437	-0.521833	0.00540974	23.6548	23.5116	23.3265	23.6801	24.1155	23.9796	23.9234	24.2418
Q2FVP2	Q2FVP2	SAOUHSC_02660			cation transmembrane transporter activity;ion transmembrane transporter activity;metal ion transmembrane transporter activity;substrate-specific transmembrane transporter activity;substrate-specific transporter activity;transmembrane transporter activity;transporter activity	cell part;membrane		36.361	5	24.2	133620000	21		0.559443	0.261947	0.226261	21.8733	22.2788	21.5979	21.85	22.0582	21.6005	21.242	21.6515
Q2FVP3	Q2FVP3	SAOUHSC_02659		biological regulation;biosynthetic process;cellular biosynthetic process;cellular macromolecule biosynthetic process;cellular macromolecule metabolic process;cellular metabolic process;cellular nitrogen compound metabolic process;cellular process;macromolecule biosynthetic process;macromolecule metabolic process;metabolic process;nitrogen compound metabolic process;nucleic acid metabolic process;…	binding;DNA binding;nucleic acid binding			24.478	2	8.7	142640000	16		0.0468596	0.0489111	0.871705	21.7218	21.9238	21.8331	22.405	22.1664	22.4226	22.1567	20.9424
Q2FVP8	Q2FVP8	SAOUHSC_02654	Ferredoxin--NADP reductase		binding;catalytic activity;coenzyme binding;cofactor binding;ferredoxin-NADP+ reductase activity;flavin adenine dinucleotide binding;NADP binding;nucleotide binding;oxidoreductase activity;oxidoreductase activity, acting on iron-sulfur proteins as donors;oxidoreductase activity, acting on iron-sulfur proteins as donors, NAD or NADP as acceptor		Pyrimidine metabolism;Selenocompound metabolism	38.229	16	56.7	5865100000	152	+	4.02532	0.967784	0.000659794	25.4827	25.598	25.9013	25.7499	24.8302	24.584	24.6817	24.7648
Q2FVP9	Q2FVP9	SAOUHSC_02653			acetyltransferase activity;catalytic activity;N-acetyltransferase activity;N-acyltransferase activity;transferase activity;transferase activity, transferring acyl groups;transferase activity, transferring acyl groups other than amino-acyl groups			12.225	4	69.4	667450000	40	+	2.31218	1.0663	0.00723762	23.9481	24.196	24.1829	23.5503	23.3611	22.6007	22.5626	23.0877
Q2FVQ0	Q2FVQ0	SAOUHSC_02652			binding;catalytic activity;cation binding;ion binding;metal ion binding;oxidoreductase activity;transition metal ion binding;zinc ion binding			32.865	17	62.3	13058000000	385	+	1.81873	-0.246784	0.0148175	26.1631	26.1719	26.1734	26.3653	26.4389	26.3997	26.3957	26.6264
Q2FVQ1	Q2FVQ1	SAOUHSC_02651			acetyltransferase activity;catalytic activity;N-acetyltransferase activity;N-acyltransferase activity;transferase activity;transferase activity, transferring acyl groups;transferase activity, transferring acyl groups other than amino-acyl groups			20.071	13	98.2	3312500000	206	+	3.29213	0.491311	0.00198883	24.761	24.8301	24.8355	24.8593	24.1444	24.3493	24.3454	24.4815
Q2FVQ2	Q2FVQ2	SAOUHSC_02650	Uncharacterized lipoprotein SAOUHSC_02650			cell part;membrane;plasma membrane		23.362	7	39.7	16733000000	95	+	2.55548	-0.52836	0.00535673	28.0245	27.9997	27.8536	28.3055	28.601	28.4622	28.7094	28.5241
Q2FVQ3	Q2FVQ3	SAOUHSC_02649			catalytic activity;CDP-glycerol glycerophosphotransferase activity;phosphotransferase activity, for other substituted phosphate groups;transferase activity;transferase activity, transferring phosphorus-containing groups	cell part;membrane		64.536	10	24.1	2960000000	143		0.274664	0.104134	0.453768	24.8154	24.6382	24.9703	24.8457	24.7898	24.6411	24.3737	25.0485
Q2FVQ4	Q2FVQ4	SAOUHSC_02648			carboxylic acid transmembrane transporter activity;lactate transmembrane transporter activity;monocarboxylic acid transmembrane transporter activity;organic acid transmembrane transporter activity;substrate-specific transmembrane transporter activity;substrate-specific transporter activity;transmembrane transporter activity;transporter activity	cell part;integral to membrane;integral to plasma membrane;intrinsic to membrane;intrinsic to plasma membrane;membrane part;plasma membrane part		56.641	8	9.8	4232700000	85	+	1.91414	-0.888236	0.0124138	25.058	25.4981	25.5356	25.7904	26.4703	26.6197	25.7681	26.5769
Q2FVQ5	Q2FVQ5	mqo	Probable malate:quinone oxidoreductase	acetyl-CoA catabolic process;acetyl-CoA metabolic process;catabolic process;cellular catabolic process;cellular metabolic process;cellular process;coenzyme catabolic process;coenzyme metabolic process;cofactor catabolic process;cofactor metabolic process;metabolic process;tricarboxylic acid cycle	catalytic activity;malate dehydrogenase (menaquinone) activity;malate dehydrogenase (quinone) activity;malate dehydrogenase activity;oxidoreductase activity;oxidoreductase activity, acting on CH-OH group of donors;oxidoreductase activity, acting on the CH-OH group of donors, quinone or similar compound as acceptor		Pyruvate metabolism	54.813	52	76.2	64686000000	1241		0.00925414	0.00158501	0.974501	27.031	27.2084	27.1266	27.1776	27.25	27.108	27.0474	27.1319
Q2FVQ8	Q2FVQ8	hssS	Heme sensor protein HssS	multi-organism process;pathogenesis	adenyl nucleotide binding;adenyl ribonucleotide binding;ATP binding;binding;catalytic activity;kinase activity;molecular transducer activity;nucleotide binding;phosphotransferase activity, alcohol group as acceptor;phosphotransferase activity, nitrogenous group as acceptor;protein histidine kinase activity;protein kinase activity;purine nucleotide binding;purine ribonucleoside triphosphate bindin…	cell part;integral to membrane;intrinsic to membrane;membrane;membrane part;plasma membrane		52.374	4	12.3	178420000	6		0.516789	0.311025	0.249971	22.8386	22.7091	22.9334	22.4376	22.4952	22.5049	21.7231	22.9514
Q2FVQ9	Q2FVQ9	hssR	Heme response regulator HssR	biological regulation;biosynthetic process;cellular biosynthetic process;cellular macromolecule biosynthetic process;cellular macromolecule metabolic process;cellular metabolic process;cellular nitrogen compound metabolic process;cellular process;cellular response to stimulus;macromolecule biosynthetic process;macromolecule metabolic process;metabolic process;multi-organism process;nitrogen compo…	binding;DNA binding;nucleic acid binding	cell part;cytoplasm;intracellular part		25.946	2	19.2	583820000	6		0.357006	-0.0662637	0.362607	23.8829	23.9589	24.008	24.1316	23.9026	24.1049	24.1914	24.0476
Q2FVR0	Q2FVR0	hrtB	Putative hemin transport system permease protein HrtB	establishment of localization;transport		cell part;integral to membrane;intrinsic to membrane;membrane;membrane part;plasma membrane	ABC transporters	39.481	2	5.1	79725000	6		0.417612	0.539358	0.311284	20.312	22.6898	20.9835	21.9568	21.5537	20.4855	21.0061	20.7392
Q2FVR1	Q2FVR1	hrtA	Putative hemin import ATP-binding protein HrtA	establishment of localization;transport	adenyl nucleotide binding;adenyl ribonucleotide binding;ATP binding;ATPase activity;binding;catalytic activity;hydrolase activity;hydrolase activity, acting on acid anhydrides;hydrolase activity, acting on acid anhydrides, in phosphorus-containing anhydrides;nucleoside-triphosphatase activity;nucleotide binding;purine nucleotide binding;purine ribonucleoside triphosphate binding;purine ribonucleo…	cell part;membrane;plasma membrane	ABC transporters	24.626	6	48.9	178150000	20		0.0330239	0.06457	0.907864	22.148	20.4124	21.0725	22.2982	21.8403	21.6444	22.2315	19.9566
Q2FVR9	Q2FVR9	fni	Isopentenyl-diphosphate delta-isomerase	biosynthetic process;cellular biosynthetic process;cellular lipid metabolic process;cellular metabolic process;cellular process;isoprenoid biosynthetic process;isoprenoid metabolic process;lipid biosynthetic process;lipid metabolic process;metabolic process;primary metabolic process	binding;catalytic activity;cation binding;coenzyme binding;cofactor binding;FMN binding;intramolecular oxidoreductase activity;intramolecular oxidoreductase activity, transposing C=C bonds;ion binding;isomerase activity;isopentenyl-diphosphate delta-isomerase activity;magnesium ion binding;metal ion binding;NADP binding;NADPH binding;nucleotide binding;oxidoreductase activity	cell part;cytoplasm;intracellular part	Terpenoid backbone biosynthesis	38.77	25	61.6	18148000000	518	+	2.83844	-0.202439	0.00341176	26.0832	26.0413	26.1873	26.126	26.319	26.2571	26.3274	26.3441
Q2FVS0	Q2FVS0	SAOUHSC_02622			acidic amino acid transmembrane transporter activity;active transmembrane transporter activity;amine transmembrane transporter activity;amino acid transmembrane transporter activity;carboxylic acid transmembrane transporter activity;cation transmembrane transporter activity;cation:amino acid symporter activity;glutamate:sodium symporter activity;inorganic cation transmembrane transporter activity…	cell part;integral to membrane;intrinsic to membrane;membrane part		43.263	1	7.2	211700000	10		0.147536	-0.198719	0.644	20.3305	22.0261	22.2552	20.8843	21.3326	21.8532	21.056	22.0493
Q2FVS1	Q2FVS1	SAOUHSC_02621	Putative 3-methyladenine DNA glycosylase	base-excision repair;cellular macromolecule metabolic process;cellular metabolic process;cellular nitrogen compound metabolic process;cellular process;cellular response to stimulus;cellular response to stress;DNA metabolic process;DNA repair;macromolecule metabolic process;metabolic process;nitrogen compound metabolic process;nucleic acid metabolic process;nucleobase-containing compound metabolic…	alkylbase DNA N-glycosylase activity;binding;catalytic activity;DNA binding;DNA N-glycosylase activity;hydrolase activity;hydrolase activity, acting on glycosyl bonds;hydrolase activity, hydrolyzing N-glycosyl compounds;nucleic acid binding		Base excision repair	22.771	10	49.5	1026500000	73		0.0333195	0.0165472	0.907395	23.719	23.9069	23.7911	23.7063	24.1062	23.5163	23.4495	23.9852
Q2FVS2	Q2FVS2	SAOUHSC_02620				cell part;integral to membrane;intrinsic to membrane;membrane part		24.956	10	34	4060600000	115	+	4.16652	-1.19414	0.000771084	23.57	24.0829	23.6849	23.7987	24.8263	25.0676	25.0482	24.9709
Q2FVS3	Q2FVS3	SAOUHSC_02619			adenyl nucleotide binding;adenyl ribonucleotide binding;ATP binding;ATPase activity;binding;catalytic activity;hydrolase activity;hydrolase activity, acting on acid anhydrides;hydrolase activity, acting on acid anhydrides, in phosphorus-containing anhydrides;nucleoside-triphosphatase activity;nucleotide binding;purine nucleotide binding;purine ribonucleoside triphosphate binding;purine ribonucleo…			33.721	21	67.2	6323200000	277	+	2.94115	-0.70511	0.002864	23.6524	23.9746	23.7854	23.9538	24.2797	24.6019	24.7267	24.5782
Q2FVS4	Q2FVS4	SAOUHSC_02618						45.929	8	23.7	1525800000	106	+	1.39189	-0.594199	0.0337557	22.9819	23.1826	22.4734	23.3224	23.3484	23.6278	23.4203	23.9406
Q2FVS7	Q2FVS7	SAOUHSC_02614		carbohydrate metabolic process;metabolic process;primary metabolic process	aldose 1-epimerase activity;binding;carbohydrate binding;catalytic activity;isomerase activity;racemase and epimerase activity;racemase and epimerase activity, acting on carbohydrates and derivatives		Glycolysis / Gluconeogenesis	39.279	13	46.9	2943800000	132		1.12721	0.299168	0.0597243	24.0174	23.8918	24.0217	24.3885	23.8638	23.5902	23.6853	23.9835
Q2FVS9	Q2FVS9	SAOUHSC_02613			binding;catalytic activity;cation binding;cofactor binding;ion binding;metal ion binding;molybdenum ion binding;pyridoxal phosphate binding;transition metal ion binding;vitamin B6 binding;vitamin binding			25.225	3	21.2	7462700000	52	+	1.34738	0.296715	0.0372138	27.4873	27.3985	27.7858	27.4613	27.1726	27.122	27.1786	27.4728
Q2FVT0	Q2FVT0	rpiA	Ribose-5-phosphate isomerase A	alcohol metabolic process;carbohydrate metabolic process;cellular carbohydrate metabolic process;cellular metabolic process;cellular process;metabolic process;monosaccharide metabolic process;pentose metabolic process;pentose-phosphate shunt, non-oxidative branch;primary metabolic process;small molecule metabolic process	catalytic activity;intramolecular oxidoreductase activity;intramolecular oxidoreductase activity, interconverting aldoses and ketoses;isomerase activity;ribose-5-phosphate isomerase activity		Carbon fixation in photosynthetic organisms;Pentose phosphate pathway	25.549	16	66.7	11809000000	244		0.11231	0.0396056	0.713137	26.2377	26.057	26.0699	26.5443	26.0858	26.366	26.2019	26.0968
Q2FVT2	Q2FVT2	hutG	Formimidoylglutamase	amine catabolic process;amine metabolic process;carboxylic acid catabolic process;carboxylic acid metabolic process;catabolic process;cellular amine metabolic process;cellular amino acid catabolic process;cellular amino acid metabolic process;cellular catabolic process;cellular ketone metabolic process;cellular metabolic process;cellular nitrogen compound metabolic process;cellular process;format…	binding;catalytic activity;cation binding;formimidoylglutamase activity;hydrolase activity;hydrolase activity, acting on carbon-nitrogen (but not peptide) bonds;hydrolase activity, acting on carbon-nitrogen (but not peptide) bonds, in linear amidines;ion binding;manganese ion binding;metal ion binding;transition metal ion binding		Histidine metabolism	34.513	15	61.7	7996600000	281	+	1.73579	-0.306656	0.016226	24.3232	24.3425	24.2207	24.521	24.5524	24.5243	24.7301	24.8271
Q2FVT4	Q2FVT4	SAOUHSC_02608		biosynthetic process;cellular biosynthetic process;cellular macromolecule biosynthetic process;cellular macromolecule metabolic process;cellular metabolic process;cellular nitrogen compound metabolic process;cellular process;macromolecule biosynthetic process;macromolecule metabolic process;metabolic process;nitrogen compound metabolic process;nucleic acid metabolic process;nucleobase-containing …	binding;DNA binding;nucleic acid binding;nucleic acid binding transcription factor activity;sequence-specific DNA binding transcription factor activity			35.018	7	26.2	437660000	45		0.0922884	0.117733	0.757201	21.4901	20.7596	21.3683	22.3731	21.7331	21.7821	20.413	21.5919
Q2FVT5	Q2FVT5	hutU	Urocanate hydratase	amine catabolic process;amine metabolic process;carboxylic acid catabolic process;carboxylic acid metabolic process;catabolic process;cellular amine metabolic process;cellular amino acid catabolic process;cellular amino acid metabolic process;cellular catabolic process;cellular ketone metabolic process;cellular metabolic process;cellular nitrogen compound metabolic process;cellular process;format…	carbon-oxygen lyase activity;catalytic activity;hydro-lyase activity;lyase activity;urocanate hydratase activity	cell part;cytoplasm;intracellular part	Histidine metabolism	60.632	55	73.1	127000000000	1438	+	1.45135	0.204434	0.0296952	28.5836	28.6076	28.5737	28.7246	28.4053	28.3046	28.6096	28.3522
Q2FVT6	Q2FVT6	hutI	Imidazolonepropionase	amine catabolic process;amine metabolic process;carboxylic acid catabolic process;carboxylic acid metabolic process;catabolic process;cellular amine metabolic process;cellular amino acid catabolic process;cellular amino acid metabolic process;cellular catabolic process;cellular ketone metabolic process;cellular metabolic process;cellular nitrogen compound metabolic process;cellular process;format…	binding;catalytic activity;cation binding;hydrolase activity;hydrolase activity, acting on carbon-nitrogen (but not peptide) bonds;hydrolase activity, acting on carbon-nitrogen (but not peptide) bonds, in cyclic amides;imidazolonepropionase activity;ion binding;iron ion binding;metal ion binding;transition metal ion binding;zinc ion binding	cell part;cytoplasm;intracellular part	Histidine metabolism	45.038	34	91.3	61480000000	995		0.0157776	0.00443792	0.955848	27.8458	27.8121	27.7117	27.8255	27.8574	27.6101	28.0173	27.6925
Q2FVT7	Q2FVT7	SAOUHSC_02605			catalytic activity;hydrolase activity			41.396	4	16.9	1151400000	24		0.316121	0.428979	0.406615	24.7554	25.7368	23.939	25.5072	23.6721	25.3124	25.1688	24.0693
Q2FVT8	Q2FVT8	SAOUHSC_02604			catalytic activity;oxidoreductase activity			31.734	13	44.7	4556800000	219	+	2.76137	-1.01945	0.00341528	23.6081	23.7971	23.5898	24.1691	24.8199	24.7669	25.1554	24.4996
Q2FVU1	Q2FVU1	SAOUHSC_02601				cell part;integral to membrane;intrinsic to membrane;membrane part		42.605	2	3	110620000	27		0.5959	-0.283016	0.205638	21.8378	22.0216	21.6083	21.5772	22.3446	22.0079	21.4966	22.3279
Q2FVU2	Q2FVU2	SAOUHSC_02600		response to stimulus;response to stress				20.083	19	75.6	11955000000	378		0.0073598	-0.00178146	0.979897	25.6987	25.6169	25.7471	25.7027	25.6805	25.4954	25.8646	25.7322
Q2FVU3	Q2FVU3	SAOUHSC_02599		carbohydrate metabolic process;metabolic process;primary metabolic process	binding;carbohydrate binding;DNA binding;nucleic acid binding;nucleic acid binding transcription factor activity;sequence-specific DNA binding transcription factor activity			29.784	4	22	417930000	29		0.600648	0.301002	0.203897	22.6676	22.6672	22.5417	23.0215	21.7892	22.5768	22.6218	22.7062
Q2FVU4	Q2FVU4	SAOUHSC_02597		carbohydrate transport;establishment of localization;organic substance transport;phosphoenolpyruvate-dependent sugar phosphotransferase system;transport	active transmembrane transporter activity;carbohydrate transmembrane transporter activity;catalytic activity;kinase activity;phosphotransferase activity, alcohol group as acceptor;protein-N(PI)-phosphohistidine-sugar phosphotransferase activity;substrate-specific transmembrane transporter activity;substrate-specific transporter activity;transferase activity;transferase activity, transferring phos…	cell part;integral to membrane;intrinsic to membrane;membrane;membrane part;plasma membrane	Glycolysis / Gluconeogenesis;Phosphotransferase system (PTS)	59.329	16	23.8	21518000000	409	+	2.31204	0.629218	0.00721975	27.5481	27.6627	27.4928	27.6782	26.6521	27.084	26.8451	27.2838
Q2FVU7	Q2FVU7	SAOUHSC_02594			catalytic activity;hydrolase activity			23.57	11	64.9	6584700000	272		0.0160707	-0.00234699	0.955547	25.3919	25.4822	25.484	25.3901	25.3793	25.3566	25.5195	25.5022
Q2FVV1	Q2FVV1	SAOUHSC_02590			active transmembrane transporter activity;amine transmembrane transporter activity;amino acid transmembrane transporter activity;carboxylic acid transmembrane transporter activity;organic acid transmembrane transporter activity;substrate-specific transmembrane transporter activity;substrate-specific transporter activity;transmembrane transporter activity;transporter activity	cell part;integral to membrane;intrinsic to membrane;membrane part		50.352	3	6.3	863940000	49	+	1.87747	-0.579112	0.0133809	23.6931	23.4891	22.9916	23.4367	24.0775	23.9749	23.7661	24.1084
Q2FVV2	Q2FVV2	SAOUHSC_02589		carbohydrate metabolic process;metabolic process;primary metabolic process	binding;carbohydrate binding;DNA binding;nucleic acid binding;nucleic acid binding transcription factor activity;sequence-specific DNA binding transcription factor activity			33.004	24	55.2	13212000000	356	+	2.41773	-4.13514	0.00615144	23.4125	19.6373	22.6881	20.3634	25.6403	25.7399	25.6438	25.6177
Q2FVV6	Q2FVV6	SAOUHSC_02585			binding;DNA binding;nucleic acid binding;nucleic acid binding transcription factor activity;sequence-specific DNA binding transcription factor activity	cell part;intracellular		26.618	14	53.5	5945000000	262	+	4.56533	0.677371	0	25.1087	24.9836	25.0627	25.0465	24.3153	24.2607	24.5021	24.414
Q2FVV7	Q2FVV7	SAOUHSC_02584		cellular lipid metabolic process;cellular metabolic process;cellular process;glycerolipid metabolic process;glycerophospholipid metabolic process;lipid metabolic process;lipid modification;lipid phosphorylation;metabolic process;organophosphate metabolic process;phosphate-containing compound metabolic process;phosphatidylinositol metabolic process;phosphatidylinositol phosphorylation;phospholipid…				30.385	6	24.9	439190000	20		0.346357	0.148668	0.37245	23.3462	22.9737	22.9259	23.5177	22.9657	23.2847	23.1598	22.7587
Q2FVV8	Q2FVV8	SAOUHSC_02583						33.804	33	82.1	36974000000	879	+	3.92978	1.14427	0.000598131	27.4131	27.2236	27.5653	27.0105	26.144	26.2078	26.2553	26.0283
Q2FVV9	Q2FVV9	SAOUHSC_02582	Putative formate dehydrogenase SAOUHSC_02582	carboxylic acid metabolic process;cellular ketone metabolic process;cellular metabolic process;cellular process;formate metabolic process;metabolic process;monocarboxylic acid metabolic process;organic acid metabolic process;oxoacid metabolic process;small molecule metabolic process	2 iron, 2 sulfur cluster binding;4 iron, 4 sulfur cluster binding;binding;catalytic activity;cation binding;electron carrier activity;formate dehydrogenase (NAD+) activity;ion binding;iron-sulfur cluster binding;metal cluster binding;metal ion binding;molybdenum ion binding;oxidoreductase activity;oxidoreductase activity, acting on the aldehyde or oxo group of donors;oxidoreductase activity, acti…		Glyoxylate and dicarboxylate metabolism;Methane metabolism	111.24	49	47.1	28747000000	715	+	6.03374	-1.70331	0	24.6461	24.9562	24.5878	24.6551	26.4309	26.437	26.3846	26.406
Q2FVW0	Q2FVW0	SAOUHSC_02581						17.478	8	46.5	2119500000	83		0.259394	-0.648894	0.470372	20.1846	20.7258	21.7215	19.1024	18.9721	21.0976	21.0351	23.2251
Q2FVW2	Q2FVW2	SAOUHSC_02580			amidase activity;catalytic activity;hydrolase activity;hydrolase activity, acting on carbon-nitrogen (but not peptide) bonds;hydrolase activity, acting on carbon-nitrogen (but not peptide) bonds, in linear amides			24.389	5	34.9	430300000	49	+	1.2306	-0.77046	0.0482529	22.5044	22.8623	22.638	23.164	24.4316	23.1779	23.4692	23.1717
Q2FVW3	Q2FVW3	SAOUHSC_02579			catalytic activity;oxidoreductase activity			41.89	20	56.1	11323000000	333		0.597041	0.149859	0.205273	25.8996	25.8843	25.7994	26.1956	25.7567	25.7999	25.6156	26.0073
Q2FVW4	Q2FVW4	SAOUHSC_02577	Putative 2-hydroxyacid dehydrogenase SAOUHSC_02577		binding;catalytic activity;coenzyme binding;cofactor binding;NAD binding;nucleotide binding;oxidoreductase activity;oxidoreductase activity, acting on CH-OH group of donors;oxidoreductase activity, acting on the CH-OH group of donors, NAD or NADP as acceptor			34.674	51	98.7	206520000000	1549	+	3.25008	0.409568	0.00190374	29.3144	29.3153	29.2341	29.2882	28.879	28.8449	29.0356	28.7542
Q2FVW7	Q2FVW7	SAOUHSC_02556			acyl-CoA dehydrogenase activity;binding;catalytic activity;coenzyme binding;cofactor binding;flavin adenine dinucleotide binding;oxidoreductase activity;oxidoreductase activity, acting on the CH-CH group of donors			32.028	7	25.7	1000300000	57		0.303777	0.142822	0.420693	24.2198	24.0313	23.6068	24.5261	23.8357	24.0537	23.9754	23.9479
Q2FVW8	Q2FVW8	SAOUHSC_02555			catalytic activity;oxidoreductase activity;oxidoreductase activity, acting on the CH-CH group of donors			6.6286	2	48.3	2755100000	69		0.0398978	-0.0164266	0.889374	25.0696	25.4554	25.2705	25.6894	25.2858	25.4541	25.5057	25.305
Q2FVW9	Q2FVW9	SAOUHSC_02554					ABC transporters	34.011	34	81.1	46413000000	870	+	3.40304	0.934301	0.00133333	28.3715	28.4344	28.4216	28.4687	27.4088	27.4167	27.267	27.8666
Q2FVX0	Q2FVX0	SAOUHSC_02553						35.362	9	29.7	2531200000	79		0.515723	-0.289089	0.25037	24.7352	24.7652	24.3296	24.4359	24.3696	24.6923	24.8779	25.4825
Q2FVX2	Q2FVX2	SAOUHSC_02551			acetyltransferase activity;catalytic activity;N-acetyltransferase activity;N-acyltransferase activity;transferase activity;transferase activity, transferring acyl groups;transferase activity, transferring acyl groups other than amino-acyl groups			29.668	3	14.8	183410000	32		0.428263	-0.315267	0.304377	21.3024	21.7832	22.498	21.83	22.6555	21.633	22.055	22.331
Q2FVX3	Q2FVX3	fdhD	Protein FdhD homolog		catalytic activity;formate dehydrogenase (NAD+) activity;oxidoreductase activity;oxidoreductase activity, acting on the aldehyde or oxo group of donors;oxidoreductase activity, acting on the aldehyde or oxo group of donors, NAD or NADP as acceptor	cell part;cytoplasm;formate dehydrogenase complex;intracellular part;macromolecular complex;protein complex		29.415	6	37	652170000	34	+	1.56102	1.85647	0.0238452	23.4564	23.222	23.8703	23.2826	22.2182	21.1666	22.9402	20.0805
Q2FVX4	Q2FVX4	SAOUHSC_02549			active transmembrane transporter activity;anion transmembrane transporter activity;anion transmembrane-transporting ATPase activity;ATPase activity;ATPase activity, coupled;ATPase activity, coupled to movement of substances;ATPase activity, coupled to transmembrane movement of ions;ATPase activity, coupled to transmembrane movement of substances;catalytic activity;hydrolase activity;hydrolase act…	cell part;external encapsulating structure part;outer membrane-bounded periplasmic space;periplasmic space	ABC transporters	29.051	35	77.7	32405000000	876		0.645706	0.145084	0.185105	26.1914	26.3193	26.1618	26.5258	26.0484	26.1202	26.0937	26.3556
Q2FVX6	Q2FVX6	SAOUHSC_02546			adenyl nucleotide binding;adenyl ribonucleotide binding;ATP binding;ATPase activity;binding;catalytic activity;hydrolase activity;hydrolase activity, acting on acid anhydrides;hydrolase activity, acting on acid anhydrides, in phosphorus-containing anhydrides;nucleoside-triphosphatase activity;nucleotide binding;purine nucleotide binding;purine ribonucleoside triphosphate binding;purine ribonucleo…		ABC transporters	22.877	6	39.8	246940000	26		0.000377947	0.000505447	0.9989	21.8511	21.0017	21.9282	22.5553	21.742	21.9956	21.0518	22.5449
Q2FVX8	Q2FVX8	SAOUHSC_02544	Molybdenum cofactor biosynthesis protein B	aromatic compound biosynthetic process;biosynthetic process;cellular aromatic compound metabolic process;cellular biosynthetic process;cellular metabolic process;cellular nitrogen compound biosynthetic process;cellular nitrogen compound metabolic process;cellular process;coenzyme biosynthetic process;coenzyme metabolic process;cofactor biosynthetic process;cofactor metabolic process;heterocycle b…				18.5	16	94.6	19981000000	446		0.52458	0.0906949	0.245547	27.3498	27.4267	27.1954	27.5207	27.232	27.2505	27.4029	27.2445
Q2FVX9	Q2FVX9	moaC	Cyclic pyranopterin monophosphate synthase accessory protein	aromatic compound biosynthetic process;biosynthetic process;cellular aromatic compound metabolic process;cellular biosynthetic process;cellular metabolic process;cellular nitrogen compound biosynthetic process;cellular nitrogen compound metabolic process;cellular process;coenzyme biosynthetic process;coenzyme metabolic process;cofactor biosynthetic process;cofactor metabolic process;heterocycle b…			Folate biosynthesis;Sulfur relay system	17.694	12	66.5	8320000000	223	+	2.96302	-0.224746	0.00231148	25.2123	25.2695	25.2814	25.1941	25.5244	25.3747	25.4701	25.487
Q2FVY0	Q2FVY0	SAOUHSC_02542		aromatic compound biosynthetic process;biosynthetic process;cellular aromatic compound metabolic process;cellular biosynthetic process;cellular metabolic process;cellular nitrogen compound biosynthetic process;cellular nitrogen compound metabolic process;cellular process;coenzyme metabolic process;cofactor biosynthetic process;cofactor metabolic process;heterocycle biosynthetic process;heterocycl…				45.016	30	81.9	30802000000	781	+	3.06604	0.236802	0.002	26.4961	26.4509	26.4399	26.5207	26.2427	26.24	26.1566	26.3212
Q2FVY1	Q2FVY1	SAOUHSC_02541		aromatic compound biosynthetic process;biosynthetic process;cellular aromatic compound metabolic process;cellular biosynthetic process;cellular metabolic process;cellular nitrogen compound biosynthetic process;cellular nitrogen compound metabolic process;cellular process;coenzyme biosynthetic process;coenzyme metabolic process;cofactor biosynthetic process;cofactor metabolic process;heterocycle b…	binding;GTP binding;guanyl nucleotide binding;guanyl ribonucleotide binding;nucleotide binding;purine nucleotide binding;purine ribonucleoside triphosphate binding;purine ribonucleotide binding;ribonucleotide binding			18.569	4	29.2	333230000	55		0.74672	0.810278	0.148192	22.7505	22.6032	22.4912	23.0723	21.4804	22.796	22.7389	20.6608
Q2FVY2	Q2FVY2	SAOUHSC_02540		aromatic compound biosynthetic process;biosynthetic process;cellular aromatic compound metabolic process;cellular biosynthetic process;cellular metabolic process;cellular nitrogen compound biosynthetic process;cellular nitrogen compound metabolic process;cellular process;coenzyme biosynthetic process;coenzyme metabolic process;cofactor biosynthetic process;cofactor metabolic process;heterocycle b…			Folate biosynthesis;Sulfur relay system	17.338	7	58.1	2159000000	112		0.593173	0.203252	0.206586	24.8143	24.4214	24.4562	24.8155	24.1187	24.3476	24.6159	24.6121
Q2FVY3	Q2FVY3	moaD	Molybdopterin synthase sulfur carrier subunit	aromatic compound biosynthetic process;biosynthetic process;cellular aromatic compound metabolic process;cellular biosynthetic process;cellular metabolic process;cellular nitrogen compound biosynthetic process;cellular nitrogen compound metabolic process;cellular process;coenzyme biosynthetic process;coenzyme metabolic process;cofactor biosynthetic process;cofactor metabolic process;heterocycle b…	binding;nucleotide binding		Folate biosynthesis;Sulfur relay system	8.871	6	75.3	1097600000	46		0.163372	-0.140565	0.613043	23.5958	23.9039	24.2985	23.6544	23.4052	23.7918	24.0331	24.7847
Q2FVY4	Q2FVY4	mobA	Probable molybdenum cofactor guanylyltransferase	aromatic compound biosynthetic process;biosynthetic process;cellular aromatic compound metabolic process;cellular biosynthetic process;cellular metabolic process;cellular nitrogen compound biosynthetic process;cellular nitrogen compound metabolic process;cellular process;coenzyme biosynthetic process;coenzyme metabolic process;cofactor biosynthetic process;cofactor metabolic process;heterocycle b…	binding;cation binding;GTP binding;guanyl nucleotide binding;guanyl ribonucleotide binding;ion binding;metal ion binding;nucleotide binding;purine nucleotide binding;purine ribonucleoside triphosphate binding;purine ribonucleotide binding;ribonucleotide binding	cell part;cytoplasm;intracellular part		22.541	2	13.1	762950000	75		0.302719	-0.149301	0.422173	23.5621	23.3784	23.1657	23.4004	23.5252	23.0312	23.5899	23.9576
Q2FVY9	Q2FVY9	sarV	HTH-type transcriptional regulator SarV	biosynthetic process;cellular biosynthetic process;cellular macromolecule biosynthetic process;cellular macromolecule metabolic process;cellular metabolic process;cellular nitrogen compound metabolic process;cellular process;macromolecule biosynthetic process;macromolecule metabolic process;metabolic process;multi-organism process;nitrogen compound metabolic process;nucleic acid metabolic process…	binding;DNA binding;nucleic acid binding;nucleic acid binding transcription factor activity;sequence-specific DNA binding transcription factor activity	cell part;cytoplasm;intracellular part		13.986	7	31	434260000	30		1.12106	0.786139	0.0605728	22.5339	22.0302	22.1	22.8448	21.2179	21.4644	21.1732	22.5087
Q2FVZ2	Q2FVZ2	SAOUHSC_02529						30.049	10	56.7	2159100000	110		0.316287	0.0856304	0.406677	24.1974	24.1634	24.1234	23.9993	24.246	23.8574	23.8481	24.1894
Q2FVZ4	Q2FVZ4	femX	Lipid II:glycine glycyltransferase	amine metabolic process;aminoglycan biosynthetic process;aminoglycan metabolic process;biological regulation;biosynthetic process;carbohydrate biosynthetic process;carbohydrate metabolic process;cell wall macromolecule biosynthetic process;cell wall macromolecule metabolic process;cell wall organization;cell wall organization or biogenesis;cellular biosynthetic process;cellular cell wall macromol…	catalytic activity;transferase activity;transferase activity, transferring acyl groups;transferase activity, transferring amino-acyl groups	cell part;cytoplasm;intracellular part	Peptidoglycan biosynthesis	48.521	44	89.1	34287000000	1025		0.437154	-0.0582623	0.297826	26.734	26.6955	26.805	26.8498	26.949	26.7742	26.7314	26.8628
Q2FVZ5	Q2FVZ5	SAOUHSC_02525			transporter activity	cell part;membrane		114.7	16	20.7	3042900000	221		0.796282	0.177766	0.133526	23.7298	23.5644	23.9042	23.7414	23.6593	23.4011	23.4209	23.7476
Q2FVZ7	Q2FVZ7	SAOUHSC_02523						6.3941	5	90.7	3298300000	147		0.17379	-0.0533104	0.596555	24.8049	24.5852	24.4832	24.8504	24.5121	24.7187	24.8439	24.8621
Q2FW01	Q2FW01	SAOUHSC_02519			acetyltransferase activity;catalytic activity;N-acetyltransferase activity;N-acyltransferase activity;transferase activity;transferase activity, transferring acyl groups;transferase activity, transferring acyl groups other than amino-acyl groups			34.763	14	56.6	8950900000	255	+	1.76211	0.551167	0.0160993	25.2686	25.1015	25.4934	25.2144	24.3883	24.7622	24.6265	25.0962
Q2FW03	Q2FW03	topB	DNA topoisomerase 3	cellular macromolecule metabolic process;cellular metabolic process;cellular nitrogen compound metabolic process;cellular process;DNA conformation change;DNA metabolic process;DNA topological change;macromolecule metabolic process;metabolic process;nitrogen compound metabolic process;nucleic acid metabolic process;nucleobase-containing compound metabolic process;primary metabolic process	binding;catalytic activity;cation binding;DNA binding;DNA topoisomerase activity;DNA topoisomerase type I activity;ion binding;isomerase activity;magnesium ion binding;metal ion binding;nucleic acid binding			81.551	38	55.4	9825500000	534		0.0673905	-0.0142021	0.816094	25.0888	24.9966	24.9675	25.1544	24.92	25.1411	25.0115	25.1914
Q2FW05	Q2FW05	SAOUHSC_02515						14.638	2	9.3	2278000000	56		0.990144	0.267059	0.0851377	25.3453	25.1282	24.9223	25.3987	25.1341	25.0064	24.8288	24.757
Q2FW06	Q2FW06	rplC	50S ribosomal protein L3	biosynthetic process;cellular biosynthetic process;cellular macromolecule biosynthetic process;cellular macromolecule metabolic process;cellular metabolic process;cellular process;cellular protein metabolic process;macromolecule biosynthetic process;macromolecule metabolic process;metabolic process;primary metabolic process;protein metabolic process;translation	binding;nucleic acid binding;RNA binding;rRNA binding;structural constituent of ribosome;structural molecule activity	cell part;cytoplasmic part;intracellular non-membrane-bounded organelle;intracellular organelle;intracellular part;macromolecular complex;non-membrane-bounded organelle;organelle;ribonucleoprotein complex;ribosome	Ribosome	23.718	39	97.3	314060000000	1967	+	3.28809	-0.618839	0.00196685	29.9393	30.0562	29.8907	29.9244	30.6916	30.7291	30.4934	30.3717
Q2FW07	Q2FW07	rplD	50S ribosomal protein L4	biosynthetic process;cellular biosynthetic process;cellular macromolecule biosynthetic process;cellular macromolecule metabolic process;cellular metabolic process;cellular process;cellular protein metabolic process;macromolecule biosynthetic process;macromolecule metabolic process;metabolic process;primary metabolic process;protein metabolic process;translation	binding;nucleic acid binding;RNA binding;rRNA binding;structural constituent of ribosome;structural molecule activity	cell part;cytoplasmic part;intracellular non-membrane-bounded organelle;intracellular organelle;intracellular part;macromolecular complex;non-membrane-bounded organelle;organelle;ribonucleoprotein complex;ribosome	Ribosome	22.464	33	95.2	565030000000	1416	+	4.09165	-0.416596	0.000719101	31.5769	31.6196	31.5943	31.6538	32.0454	32.1298	31.9348	32.001
Q2FW08	Q2FW08	rplW	50S ribosomal protein L23	biosynthetic process;cellular biosynthetic process;cellular macromolecule biosynthetic process;cellular macromolecule metabolic process;cellular metabolic process;cellular process;cellular protein metabolic process;macromolecule biosynthetic process;macromolecule metabolic process;metabolic process;primary metabolic process;protein metabolic process;translation	binding;nucleic acid binding;nucleotide binding;RNA binding;rRNA binding;structural constituent of ribosome;structural molecule activity	cell part;cytoplasmic part;intracellular non-membrane-bounded organelle;intracellular organelle;intracellular part;macromolecular complex;non-membrane-bounded organelle;organelle;ribonucleoprotein complex;ribosome	Ribosome	10.605	16	97.8	287720000000	763	+	1.41288	-0.281448	0.0318571	30.7081	30.8976	30.8036	30.9096	31.2817	31.2195	30.8484	31.095
Q2FW10	Q2FW10	rpsS	30S ribosomal protein S19	biosynthetic process;cellular biosynthetic process;cellular macromolecule biosynthetic process;cellular macromolecule metabolic process;cellular metabolic process;cellular process;cellular protein metabolic process;macromolecule biosynthetic process;macromolecule metabolic process;metabolic process;primary metabolic process;protein metabolic process;translation	binding;nucleic acid binding;RNA binding;rRNA binding;structural constituent of ribosome;structural molecule activity	cell part;intracellular organelle part;intracellular part;macromolecular complex;organelle part;ribonucleoprotein complex;small ribosomal subunit	Ribosome	10.615	22	93.5	243740000000	1343	+	2.35703	-0.369556	0.00615075	30.6066	30.5696	30.5475	30.6852	30.9441	31.1071	30.7639	31.072
Q2FW11	Q2FW11	rplV	50S ribosomal protein L22	biosynthetic process;cellular biosynthetic process;cellular macromolecule biosynthetic process;cellular macromolecule metabolic process;cellular metabolic process;cellular process;cellular protein metabolic process;macromolecule biosynthetic process;macromolecule metabolic process;metabolic process;primary metabolic process;protein metabolic process;translation	binding;nucleic acid binding;RNA binding;rRNA binding;structural constituent of ribosome;structural molecule activity	cell part;intracellular organelle part;intracellular part;large ribosomal subunit;macromolecular complex;organelle part;ribonucleoprotein complex	Ribosome	12.835	24	86.3	392500000000	1225	+	2.04204	-0.447212	0.00983023	30.9823	31.1345	30.8003	31.1333	31.4736	31.683	31.2588	31.4238
Q2FW12	Q2FW12	rpsC	30S ribosomal protein S3	biosynthetic process;cellular biosynthetic process;cellular macromolecule biosynthetic process;cellular macromolecule metabolic process;cellular metabolic process;cellular process;cellular protein metabolic process;macromolecule biosynthetic process;macromolecule metabolic process;metabolic process;primary metabolic process;protein metabolic process;translation	binding;mRNA binding;nucleic acid binding;RNA binding;rRNA binding;structural constituent of ribosome;structural molecule activity	cell part;intracellular organelle part;intracellular part;macromolecular complex;organelle part;ribonucleoprotein complex;small ribosomal subunit	Ribosome	24.099	51	97.2	559300000000	2165		0.977479	-0.200014	0.0876978	31.5367	31.6337	31.7715	31.7231	31.8511	31.9497	31.6194	32.0448
Q2FW13	Q2FW13	rplP	50S ribosomal protein L16	biosynthetic process;cellular biosynthetic process;cellular macromolecule biosynthetic process;cellular macromolecule metabolic process;cellular metabolic process;cellular process;cellular protein metabolic process;macromolecule biosynthetic process;macromolecule metabolic process;metabolic process;primary metabolic process;protein metabolic process;translation	binding;nucleic acid binding;RNA binding;rRNA binding;structural constituent of ribosome;structural molecule activity;tRNA binding	cell part;cytoplasmic part;intracellular non-membrane-bounded organelle;intracellular organelle;intracellular part;macromolecular complex;non-membrane-bounded organelle;organelle;ribonucleoprotein complex;ribosome	Ribosome	16.242	20	86.1	275290000000	1196		1.03011	-0.323588	0.0771303	30.7462	30.8221	30.6147	30.846	31.1695	31.2276	30.6265	31.2998
Q2FW14	Q2FW14	rpmC	50S ribosomal protein L29	biosynthetic process;cellular biosynthetic process;cellular macromolecule biosynthetic process;cellular macromolecule metabolic process;cellular metabolic process;cellular process;cellular protein metabolic process;macromolecule biosynthetic process;macromolecule metabolic process;metabolic process;primary metabolic process;protein metabolic process;translation	structural constituent of ribosome;structural molecule activity	cell part;cytoplasmic part;intracellular non-membrane-bounded organelle;intracellular organelle;intracellular part;macromolecular complex;non-membrane-bounded organelle;organelle;ribonucleoprotein complex;ribosome	Ribosome	8.0902	13	82.6	96336000000	431		1.05528	-0.177064	0.0705058	31.0514	31.184	31.1556	31.1441	31.1927	31.3564	31.1707	31.5237
Q2FW15	Q2FW15	rpsQ	30S ribosomal protein S17	biosynthetic process;cellular biosynthetic process;cellular macromolecule biosynthetic process;cellular macromolecule metabolic process;cellular metabolic process;cellular process;cellular protein metabolic process;macromolecule biosynthetic process;macromolecule metabolic process;metabolic process;primary metabolic process;protein metabolic process;translation	binding;nucleic acid binding;RNA binding;rRNA binding;structural constituent of ribosome;structural molecule activity	cell part;cytoplasmic part;intracellular non-membrane-bounded organelle;intracellular organelle;intracellular part;macromolecular complex;non-membrane-bounded organelle;organelle;ribonucleoprotein complex;ribosome	Ribosome	10.175	16	83.9	120510000000	673	+	1.58345	-0.317703	0.0227528	29.6132	29.6547	29.6461	29.6085	30.055	29.9879	29.6351	30.1152
Q2FW16	Q2FW16	rplN	50S ribosomal protein L14	biosynthetic process;cellular biosynthetic process;cellular macromolecule biosynthetic process;cellular macromolecule metabolic process;cellular metabolic process;cellular process;cellular protein metabolic process;macromolecule biosynthetic process;macromolecule metabolic process;metabolic process;primary metabolic process;protein metabolic process;translation	binding;nucleic acid binding;RNA binding;rRNA binding;structural constituent of ribosome;structural molecule activity	cell part;intracellular organelle part;intracellular part;large ribosomal subunit;macromolecular complex;organelle part;ribonucleoprotein complex	Ribosome	13.135	24	85.2	274300000000	758	+	2.02955	-0.568331	0.0101443	30.816	30.7825	30.3704	31.0012	31.2811	31.4459	31.3929	31.1233
Q2FW17	Q2FW17	rplX	50S ribosomal protein L24	biosynthetic process;cellular biosynthetic process;cellular macromolecule biosynthetic process;cellular macromolecule metabolic process;cellular metabolic process;cellular process;cellular protein metabolic process;macromolecule biosynthetic process;macromolecule metabolic process;metabolic process;primary metabolic process;protein metabolic process;translation	binding;nucleic acid binding;RNA binding;rRNA binding;structural constituent of ribosome;structural molecule activity	cell part;cytoplasmic part;intracellular non-membrane-bounded organelle;intracellular organelle;intracellular part;macromolecular complex;non-membrane-bounded organelle;organelle;ribonucleoprotein complex;ribosome	Ribosome	11.536	23	87.6	134160000000	917	+	1.74475	-0.348747	0.0162288	29.2537	29.3137	29.4866	29.3751	29.7109	29.7474	29.4508	29.915
Q2FW18	Q2FW18	rplE	50S ribosomal protein L5	biosynthetic process;cellular biosynthetic process;cellular macromolecule biosynthetic process;cellular macromolecule metabolic process;cellular metabolic process;cellular process;cellular protein metabolic process;macromolecule biosynthetic process;macromolecule metabolic process;metabolic process;primary metabolic process;protein metabolic process;translation	binding;nucleic acid binding;RNA binding;rRNA binding;structural constituent of ribosome;structural molecule activity;tRNA binding	cell part;cytoplasmic part;intracellular non-membrane-bounded organelle;intracellular organelle;intracellular part;macromolecular complex;non-membrane-bounded organelle;organelle;ribonucleoprotein complex;ribosome	Ribosome	20.266	46	98.3	618610000000	1876	+	3.46469	-0.332923	0.00138272	32.0334	32.035	32.0375	32.145	32.3964	32.3296	32.3591	32.4976
Q2FW19	Q2FW19	rpsZ	30S ribosomal protein S14 type Z	biosynthetic process;cellular biosynthetic process;cellular macromolecule biosynthetic process;cellular macromolecule metabolic process;cellular metabolic process;cellular process;cellular protein metabolic process;macromolecule biosynthetic process;macromolecule metabolic process;metabolic process;primary metabolic process;protein metabolic process;translation	binding;cation binding;ion binding;metal ion binding;nucleic acid binding;RNA binding;rRNA binding;structural constituent of ribosome;structural molecule activity;transition metal ion binding;zinc ion binding	cell part;cytoplasmic part;intracellular non-membrane-bounded organelle;intracellular organelle;intracellular part;macromolecular complex;non-membrane-bounded organelle;organelle;ribonucleoprotein complex;ribosome	Ribosome	7.2996	8	60.7	10400000000	135		1.10157	-0.494558	0.0632352	26.1173	25.9652	26.0313	26.1158	26.6546	26.7715	25.8755	26.9062
Q2FW20	Q2FW20	rpsH	30S ribosomal protein S8	biosynthetic process;cellular biosynthetic process;cellular macromolecule biosynthetic process;cellular macromolecule metabolic process;cellular metabolic process;cellular process;cellular protein metabolic process;macromolecule biosynthetic process;macromolecule metabolic process;metabolic process;primary metabolic process;protein metabolic process;translation	binding;nucleic acid binding;RNA binding;rRNA binding;structural constituent of ribosome;structural molecule activity	cell part;cytoplasmic part;intracellular non-membrane-bounded organelle;intracellular organelle;intracellular part;macromolecular complex;non-membrane-bounded organelle;organelle;ribonucleoprotein complex;ribosome	Ribosome	14.831	32	100	340660000000	1318	+	2.99797	-0.465027	0.00236975	30.8987	30.9617	30.6931	31.0062	31.3321	31.3959	31.2642	31.4277
Q2FW21	Q2FW21	rplF	50S ribosomal protein L6	biosynthetic process;cellular biosynthetic process;cellular macromolecule biosynthetic process;cellular macromolecule metabolic process;cellular metabolic process;cellular process;cellular protein metabolic process;macromolecule biosynthetic process;macromolecule metabolic process;metabolic process;primary metabolic process;protein metabolic process;translation	binding;nucleic acid binding;RNA binding;rRNA binding;structural constituent of ribosome;structural molecule activity	cell part;cytoplasmic part;intracellular non-membrane-bounded organelle;intracellular organelle;intracellular part;macromolecular complex;non-membrane-bounded organelle;organelle;ribonucleoprotein complex;ribosome	Ribosome	19.786	24	80.3	320960000000	1073	+	4.18342	-0.468989	0.000790123	30.6803	30.8151	30.7133	30.7869	31.1313	31.2452	31.3012	31.1937
Q2FW22	Q2FW22	rplR	50S ribosomal protein L18	biosynthetic process;cellular biosynthetic process;cellular macromolecule biosynthetic process;cellular macromolecule metabolic process;cellular metabolic process;cellular process;cellular protein metabolic process;macromolecule biosynthetic process;macromolecule metabolic process;metabolic process;primary metabolic process;protein metabolic process;translation	binding;nucleic acid binding;RNA binding;rRNA binding;structural constituent of ribosome;structural molecule activity	cell part;cytoplasmic part;intracellular non-membrane-bounded organelle;intracellular organelle;intracellular part;macromolecular complex;non-membrane-bounded organelle;organelle;ribonucleoprotein complex;ribosome	Ribosome	13.097	25	93.3	190850000000	986	+	3.13663	-0.499875	0.00214354	29.7119	29.8241	29.9097	29.8729	30.3677	30.4488	30.1397	30.362
Q2FW23	Q2FW23	rpsE	30S ribosomal protein S5	biosynthetic process;cellular biosynthetic process;cellular macromolecule biosynthetic process;cellular macromolecule metabolic process;cellular metabolic process;cellular process;cellular protein metabolic process;macromolecule biosynthetic process;macromolecule metabolic process;metabolic process;primary metabolic process;protein metabolic process;translation	binding;nucleic acid binding;RNA binding;rRNA binding;structural constituent of ribosome;structural molecule activity	cell part;intracellular organelle part;intracellular part;macromolecular complex;organelle part;ribonucleoprotein complex;small ribosomal subunit	Ribosome	17.742	36	95.8	739250000000	1670	+	1.94477	-0.395135	0.0114308	31.8568	31.8137	31.7198	31.8807	32.302	32.2463	31.9141	32.3891
Q2FW27	Q2FW27	adk	Adenylate kinase	AMP biosynthetic process;AMP metabolic process;AMP salvage;biosynthetic process;cellular biosynthetic process;cellular metabolic compound salvage;cellular metabolic process;cellular nitrogen compound biosynthetic process;cellular nitrogen compound metabolic process;cellular process;heterocycle biosynthetic process;heterocycle metabolic process;metabolic process;nitrogen compound metabolic process…	adenyl nucleotide binding;adenyl ribonucleotide binding;adenylate kinase activity;ATP binding;binding;catalytic activity;cation binding;ion binding;kinase activity;metal ion binding;nucleobase-containing compound kinase activity;nucleotide binding;nucleotide kinase activity;phosphotransferase activity, phosphate group as acceptor;purine nucleotide binding;purine ribonucleoside triphosphate bindin…	cell part;cytoplasm;intracellular part	Purine metabolism	23.974	32	86.5	77887000000	937	+	1.29746	-0.203353	0.0411973	28.3087	28.404	28.4722	28.2772	28.4023	28.5321	28.6011	28.74
Q2FW28	Q2FW28	infA	Translation initiation factor IF-1		binding;nucleic acid binding;RNA binding;translation factor activity, nucleic acid binding;translation initiation factor activity	cell part;cytoplasm;intracellular part		8.2796	9	98.6	46484000000	354	+	2.47132	-0.471739	0.0059187	29.0815	29.3014	28.9866	29.2131	29.5794	29.7849	29.6657	29.4396
Q2FW29	Q2FW29	rpmJ	50S ribosomal protein L36	biosynthetic process;cellular biosynthetic process;cellular macromolecule biosynthetic process;cellular macromolecule metabolic process;cellular metabolic process;cellular process;cellular protein metabolic process;macromolecule biosynthetic process;macromolecule metabolic process;metabolic process;primary metabolic process;protein metabolic process;translation	structural constituent of ribosome;structural molecule activity	cell part;cytoplasmic part;intracellular non-membrane-bounded organelle;intracellular organelle;intracellular part;macromolecular complex;non-membrane-bounded organelle;organelle;ribonucleoprotein complex;ribosome	Ribosome	4.3053	5	70.3	1605900000	110		0.493277	-0.324444	0.262523	24.0508	23.062	23.6334	24.1445	23.5971	24.375	23.9796	24.2367
Q2FW30	Q2FW30	rpsM	30S ribosomal protein S13	biosynthetic process;cellular biosynthetic process;cellular macromolecule biosynthetic process;cellular macromolecule metabolic process;cellular metabolic process;cellular process;cellular protein metabolic process;macromolecule biosynthetic process;macromolecule metabolic process;metabolic process;primary metabolic process;protein metabolic process;translation	binding;nucleic acid binding;RNA binding;rRNA binding;structural constituent of ribosome;structural molecule activity;tRNA binding	cell part;cytoplasmic part;intracellular non-membrane-bounded organelle;intracellular organelle;intracellular part;macromolecular complex;non-membrane-bounded organelle;organelle;ribonucleoprotein complex;ribosome	Ribosome	13.719	30	82.6	271450000000	1261		0.463733	-0.139441	0.279679	30.759	30.8637	30.9973	30.9047	31.1187	31.133	30.644	31.1867
Q2FW31	Q2FW31	rpsK	30S ribosomal protein S11	biosynthetic process;cellular biosynthetic process;cellular macromolecule biosynthetic process;cellular macromolecule metabolic process;cellular metabolic process;cellular process;cellular protein metabolic process;macromolecule biosynthetic process;macromolecule metabolic process;metabolic process;primary metabolic process;protein metabolic process;translation	binding;nucleic acid binding;RNA binding;rRNA binding;structural constituent of ribosome;structural molecule activity	cell part;cytoplasmic part;intracellular non-membrane-bounded organelle;intracellular organelle;intracellular part;macromolecular complex;non-membrane-bounded organelle;organelle;ribonucleoprotein complex;ribosome	Ribosome	13.882	20	88.4	389870000000	1078		0.888913	-0.277659	0.107496	31.4993	31.4184	31.3274	31.5684	31.8875	31.846	31.2853	31.9053
Q2FW32	Q2FW32	rpoA	DNA-directed RNA polymerase subunit alpha	biosynthetic process;cellular biosynthetic process;cellular macromolecule biosynthetic process;cellular macromolecule metabolic process;cellular metabolic process;cellular nitrogen compound metabolic process;cellular process;macromolecule biosynthetic process;macromolecule metabolic process;metabolic process;nitrogen compound metabolic process;nucleic acid metabolic process;nucleobase-containing …	binding;catalytic activity;DNA binding;DNA-directed RNA polymerase activity;nucleic acid binding;nucleotidyltransferase activity;RNA polymerase activity;transferase activity;transferase activity, transferring phosphorus-containing groups		Purine metabolism;Pyrimidine metabolism;RNA polymerase	35.011	40	96.8	242080000000	1572	+	3.64782	-0.368712	0.0009375	29.9027	29.8738	29.9691	30.0091	30.3271	30.2078	30.3194	30.3752
Q2FW33	Q2FW33	rplQ	50S ribosomal protein L17	biosynthetic process;cellular biosynthetic process;cellular macromolecule biosynthetic process;cellular macromolecule metabolic process;cellular metabolic process;cellular process;cellular protein metabolic process;macromolecule biosynthetic process;macromolecule metabolic process;metabolic process;primary metabolic process;protein metabolic process;translation	structural constituent of ribosome;structural molecule activity	cell part;cytoplasmic part;intracellular non-membrane-bounded organelle;intracellular organelle;intracellular part;macromolecular complex;non-membrane-bounded organelle;organelle;ribonucleoprotein complex;ribosome	Ribosome	13.748	27	92.6	320730000000	1043	+	2.7675	-0.39062	0.0032862	30.8031	30.8252	30.6733	30.9311	31.1197	31.1715	31.1594	31.3446
Q2FW34	Q2FW34	ecfA1	Energy-coupling factor transporter ATP-binding protein EcfA1	establishment of localization;transport	adenyl nucleotide binding;adenyl ribonucleotide binding;ATP binding;ATPase activity;binding;catalytic activity;hydrolase activity;hydrolase activity, acting on acid anhydrides;hydrolase activity, acting on acid anhydrides, in phosphorus-containing anhydrides;nucleoside-triphosphatase activity;nucleotide binding;purine nucleotide binding;purine ribonucleoside triphosphate binding;purine ribonucleo…	ATP-binding cassette (ABC) transporter complex;cell part;macromolecular complex;membrane part;protein complex	ABC transporters	30.05	8	42	1235700000	45		0.524576	-0.162559	0.245339	23.7909	23.5865	23.7372	23.6752	23.539	23.8356	24.2041	23.8614
Q2FW35	Q2FW35	ecfA2	Energy-coupling factor transporter ATP-binding protein EcfA2	establishment of localization;transport	adenyl nucleotide binding;adenyl ribonucleotide binding;ATP binding;ATPase activity;binding;catalytic activity;hydrolase activity;hydrolase activity, acting on acid anhydrides;hydrolase activity, acting on acid anhydrides, in phosphorus-containing anhydrides;nucleoside-triphosphatase activity;nucleotide binding;purine nucleotide binding;purine ribonucleoside triphosphate binding;purine ribonucleo…	ATP-binding cassette (ABC) transporter complex;cell part;macromolecular complex;membrane part;protein complex	ABC transporters	32.918	8	46.9	605290000	73		0.0424357	0.023572	0.884715	22.9241	22.9709	23.3009	23.5612	23.3572	23.3533	22.8423	23.1101
Q2FW37	Q2FW37	truA	tRNA pseudouridine synthase A	cellular macromolecule metabolic process;cellular metabolic process;cellular nitrogen compound metabolic process;cellular process;macromolecule metabolic process;macromolecule modification;metabolic process;ncRNA metabolic process;ncRNA processing;nitrogen compound metabolic process;nucleic acid metabolic process;nucleobase-containing compound metabolic process;primary metabolic process;pseudouri…	binding;catalytic activity;intramolecular transferase activity;isomerase activity;nucleic acid binding;pseudouridine synthase activity;RNA binding			31.279	5	24.7	495640000	25	+	1.33459	-1.47652	0.0382192	22.8138	22.4513	21.974	22.4265	24.8886	24.7055	22.4735	23.504
Q2FW38	Q2FW38	rplM	50S ribosomal protein L13	biosynthetic process;cellular biosynthetic process;cellular macromolecule biosynthetic process;cellular macromolecule metabolic process;cellular metabolic process;cellular process;cellular protein metabolic process;macromolecule biosynthetic process;macromolecule metabolic process;metabolic process;primary metabolic process;protein metabolic process;translation	structural constituent of ribosome;structural molecule activity	cell part;cytoplasmic part;intracellular non-membrane-bounded organelle;intracellular organelle;intracellular part;macromolecular complex;non-membrane-bounded organelle;organelle;ribonucleoprotein complex;ribosome	Ribosome	16.333	36	100	595680000000	1881	+	3.06054	-0.391872	0.00195633	31.1628	31.1107	31.0628	31.2567	31.4765	31.5982	31.6456	31.4402
Q2FW39	Q2FW39	rpsI	30S ribosomal protein S9	biosynthetic process;cellular biosynthetic process;cellular macromolecule biosynthetic process;cellular macromolecule metabolic process;cellular metabolic process;cellular process;cellular protein metabolic process;macromolecule biosynthetic process;macromolecule metabolic process;metabolic process;primary metabolic process;protein metabolic process;translation	structural constituent of ribosome;structural molecule activity	cell part;cytoplasmic part;intracellular non-membrane-bounded organelle;intracellular organelle;intracellular part;macromolecular complex;non-membrane-bounded organelle;organelle;ribonucleoprotein complex;ribosome	Ribosome	14.83	15	78.8	281280000000	505		0.873741	-0.237714	0.11098	31.2734	31.2584	31.1341	31.432	31.5296	31.6573	31.1604	31.7014
Q2FW43	Q2FW43	SAOUHSC_02474						25.961	4	22.5	692100000	31		0.493818	-0.65646	0.262553	21.8983	22.9449	23.1299	22.515	23.6641	24.4839	23.0538	21.9123
Q2FW45	Q2FW45	SAOUHSC_02472			adenyl nucleotide binding;adenyl ribonucleotide binding;ATP binding;binding;nucleotide binding;purine nucleotide binding;purine ribonucleoside triphosphate binding;purine ribonucleotide binding;ribonucleotide binding			44.1	5	17.5	636090000	55		0.248181	0.321088	0.486414	22.646	22.8394	23.0935	22.8087	23.3295	22.9021	22.8703	21.0013
Q2FW46	Q2FW46	SAOUHSC_02471						56.151	8	17.3	393950000	8		1.09208	-0.828858	0.0649526	22.3666	22.8183	22.5173	21.8292	23.04	22.589	24.1696	23.0483
Q2FW49	Q2FW49	SAOUHSC_02468		alcohol metabolic process;butanediol metabolic process;diol metabolic process;metabolic process;small molecule metabolic process	acetolactate synthase activity;binding;catalytic activity;cation binding;coenzyme binding;cofactor binding;ion binding;magnesium ion binding;metal ion binding;thiamine pyrophosphate binding;transferase activity;transferase activity, transferring aldehyde or ketonic groups;vitamin binding		Butanoate metabolism;C5-Branched dibasic acid metabolism;Pantothenate and CoA biosynthesis;Valine, leucine and isoleucine biosynthesis	61.173	6	20.2	283570000	8		0.752837	0.754588	0.146494	22.3475	23.872	23.5886	23.7595	23.2281	21.6514	22.9379	22.7319
Q2FW52	Q2FW52	SAOUHSC_02465	Uncharacterized hydrolase SAOUHSC_02465		catalytic activity;hydrolase activity			31.836	19	69.7	9118800000	344	+	4.64513	0.599269	0	25.8392	25.7673	25.8708	25.7235	25.2819	25.1437	25.1278	25.2504
Q2FW57	Q2FW57	SAOUHSC_02460			catalytic activity;oxidoreductase activity			32.202	15	54.6	11166000000	277	+	3.79127	1.0413	0.000537815	26.3457	26.0579	26.4031	26.1843	25.1055	25.1327	25.4969	25.0907
Q2FW62	Q2FW62	SAOUHSC_02445			binding;catalytic activity;cation binding;ion binding;metal ion binding;oxidoreductase activity;transition metal ion binding;zinc ion binding			37.269	18	67.9	3669800000	197	+	2.47649	0.320543	0.00585205	24.6453	24.5987	24.5915	24.7423	24.3898	24.2279	24.456	24.2219
Q2FW64	Q2FW64	SAOUHSC_02443						20.8	22	57.3	11671000000	317	+	3.42765	-1.1819	0.0013494	24.0513	24.2155	24.1081	23.8217	25.4281	25.2242	25.4416	24.8303
Q2FW65	Q2FW65	SAOUHSC_02442						9.2229	2	15.2	299790000	20		0.158285	0.208909	0.622713	20.8164	22.8505	21.3374	21.2947	21.5685	21.7158	20.6259	21.5532
Q2FW66	Q2FW66	asp23	Alkaline shock protein 23					19.191	34	84	102590000000	1088	+	2.82816	-0.747921	0.00336232	27.578	27.5728	27.5254	27.5825	28.5158	28.1564	28.5642	28.014
Q2FW70	Q2FW70	SAOUHSC_02436		biosynthetic process;cellular biosynthetic process;cellular metabolic process;cellular process;cofactor biosynthetic process;cofactor metabolic process;metabolic process;nonribosomal peptide biosynthetic process;peptide biosynthetic process;peptide metabolic process;siderophore biosynthetic process;siderophore metabolic process	cation transmembrane transporter activity;inorganic cation transmembrane transporter activity;ion transmembrane transporter activity;iron ion transmembrane transporter activity;metal ion transmembrane transporter activity;siderophore transmembrane transporter activity;siderophore transporter activity;substrate-specific transmembrane transporter activity;substrate-specific transporter activity;tra…			76.087	24	57	4880000000	265		0.0100033	-0.00253344	0.972374	23.8964	24.0544	23.968	23.9965	23.8467	24.0775	23.849	24.1522
Q2FW72	Q2FW72	SAOUHSC_02434		biosynthetic process;cellular biosynthetic process;cellular metabolic process;cellular process;cofactor biosynthetic process;cofactor metabolic process;metabolic process;nonribosomal peptide biosynthetic process;peptide biosynthetic process;peptide metabolic process;siderophore biosynthetic process;siderophore metabolic process	cation transmembrane transporter activity;inorganic cation transmembrane transporter activity;ion transmembrane transporter activity;iron ion transmembrane transporter activity;metal ion transmembrane transporter activity;siderophore transmembrane transporter activity;siderophore transporter activity;substrate-specific transmembrane transporter activity;substrate-specific transporter activity;tra…			67.211	8	21.4	159730000	14		0.000778917	0.00109482	0.998394	21.9345	21.8907	22.6898	20.9336	21.1373	22.0282	21.7123	22.5664
Q2FW75	Q2FW75	SAOUHSC_02430					ABC transporters	36.591	47	85.6	97880000000	1312	+	3.27017	0.741967	0.00192432	28.5641	28.7153	28.7029	28.8386	28.0245	27.8941	27.7427	28.1917
Q2FW79	Q2FW79	SAOUHSC_02425	UPF0457 protein SAOUHSC_02425					10.006	17	98.8	280460000000	1019		0.356032	-0.159618	0.362856	30.5752	30.7038	30.2938	30.4464	30.9309	30.5702	30.9396	30.217
Q2FW81	Q2FW81	SAOUHSC_02423	Probable uridylyltransferase SAOUHSC_02423		catalytic activity;nucleotidyltransferase activity;transferase activity;transferase activity, transferring phosphorus-containing groups;uridylyltransferase activity			44.893	33	64.6	51570000000	886	+	2.90957	0.212165	0.00277519	27.959	27.8703	28.0132	27.9164	27.6913	27.7623	27.6907	27.7659
Q2FW86	Q2FW86	SAOUHSC_02417						31.789	20	67.1	19007000000	391		0.0785894	-0.0204635	0.788801	27.115	27.205	27.0708	26.9178	27.0506	27.062	26.9725	27.3053
Q2FW91	Q2FW91	SAOUHSC_02409	Arginase	amine metabolic process;arginine metabolic process;carboxylic acid metabolic process;cellular amine metabolic process;cellular amino acid metabolic process;cellular ketone metabolic process;cellular metabolic process;cellular nitrogen compound metabolic process;cellular process;glutamine family amino acid metabolic process;metabolic process;nitrogen compound metabolic process;organic acid metabol…	arginase activity;binding;catalytic activity;cation binding;hydrolase activity;hydrolase activity, acting on carbon-nitrogen (but not peptide) bonds;hydrolase activity, acting on carbon-nitrogen (but not peptide) bonds, in linear amidines;ion binding;metal ion binding		Amoebiasis;Arginine and proline metabolism	33.264	24	72.5	22411000000	417		0.422859	0.104679	0.307896	25.7075	26.0261	25.7531	25.8283	25.8531	25.5392	25.8809	25.6231
Q2FW92	Q2FW92	SAOUHSC_02407						30.079	8	30.9	2646600000	108	+	1.78555	-0.283999	0.0155842	24.2331	24.3097	24.2276	24.4448	24.4081	24.5558	24.6591	24.7282
Q2FW93	Q2FW93	SAOUHSC_02406						34.624	26	60.3	10455000000	521	+	1.21726	-0.174794	0.049599	24.8161	24.774	24.6516	24.899	24.9449	25.0343	24.8087	25.052
Q2FW95	Q2FW95	SAOUHSC_02404				cell part;extracellular region;membrane		263.01	9	6.8	1327300000	24	+	2.49425	0.900383	0.00564444	24.877	25.6647	25.4893	25.4447	24.674	24.2843	24.3961	24.5198
Q2FW96	Q2FW96	mtlD	Mannitol-1-phosphate 5-dehydrogenase	alcohol metabolic process;alditol metabolic process;carbohydrate metabolic process;cellular carbohydrate metabolic process;cellular metabolic process;cellular process;hexitol metabolic process;mannitol metabolic process;metabolic process;polyol metabolic process;primary metabolic process;small molecule metabolic process	binding;catalytic activity;coenzyme binding;cofactor binding;mannitol-1-phosphate 5-dehydrogenase activity;oxidoreductase activity;oxidoreductase activity, acting on CH-OH group of donors;oxidoreductase activity, acting on the CH-OH group of donors, NAD or NADP as acceptor		Fructose and mannose metabolism	40.937	23	69	7944300000	361		0.110367	-0.0203333	0.717438	25.3043	25.4168	25.1877	25.4448	25.3938	25.3415	25.4297	25.2699
Q2FW97	Q2FW97	SAOUHSC_02402			active transmembrane transporter activity;carbohydrate transmembrane transporter activity;catalytic activity;phosphotransferase activity, alcohol group as acceptor;protein-N(PI)-phosphohistidine-sugar phosphotransferase activity;substrate-specific transmembrane transporter activity;substrate-specific transporter activity;transferase activity;transferase activity, transferring phosphorus-containin…		Fructose and mannose metabolism;Phosphotransferase system (PTS)	15.542	8	66.7	6042900000	159	+	2.09602	-0.311482	0.0089087	26.2472	26.214	26.1443	26.3165	26.5192	26.606	26.6885	26.3543
Q2FW99	Q2FW99	SAOUHSC_02400		carbohydrate transport;establishment of localization;organic substance transport;phosphoenolpyruvate-dependent sugar phosphotransferase system;transport	active transmembrane transporter activity;alcohol transmembrane transporter activity;carbohydrate transmembrane transporter activity;catalytic activity;mannitol transmembrane transporter activity;phosphotransferase activity, alcohol group as acceptor;polyol transmembrane transporter activity;protein-N(PI)-phosphohistidine-mannitol phosphotransferase system transmembrane transporter activity;prote…	cell part;integral to membrane;intrinsic to membrane;membrane;membrane part;plasma membrane	Fructose and mannose metabolism;Phosphotransferase system (PTS)	55.065	6	14.5	2134000000	34	+	2.52543	0.658517	0.00539429	25.4905	25.3429	25.5556	25.4227	24.4141	24.8652	24.9863	24.9121
Q2FWA0	Q2FWA0	glmS	Glutamine--fructose-6-phosphate aminotransferase [isomerizing]	amine metabolic process;carbohydrate metabolic process;carboxylic acid metabolic process;cellular amine metabolic process;cellular amino acid metabolic process;cellular ketone metabolic process;cellular metabolic process;cellular nitrogen compound metabolic process;cellular process;glutamine family amino acid metabolic process;glutamine metabolic process;metabolic process;nitrogen compound metabo…	binding;carbohydrate binding;catalytic activity;glutamine-fructose-6-phosphate transaminase (isomerizing) activity;transaminase activity;transferase activity;transferase activity, transferring nitrogenous groups	cell part;cytoplasm;intracellular part	Alanine, aspartate and glutamate metabolism;Amino sugar and nucleotide sugar metabolism	65.849	64	78.5	259160000000	1972	+	2.81818	-0.40799	0.00330249	29.005	29.16	28.9268	29.0663	29.5489	29.4379	29.5075	29.2958
Q2FWA1	Q2FWA1	SAOUHSC_02397			adenyl nucleotide binding;adenyl ribonucleotide binding;ATP binding;ATPase activity;binding;catalytic activity;hydrolase activity;hydrolase activity, acting on acid anhydrides;hydrolase activity, acting on acid anhydrides, in phosphorus-containing anhydrides;nucleoside-triphosphatase activity;nucleotide binding;purine nucleotide binding;purine ribonucleoside triphosphate binding;purine ribonucleo…		ABC transporters	29.005	4	18.8	1301400000	33	+	1.89231	-0.731762	0.0129943	24.1521	24.1257	23.5681	23.6861	24.7917	24.3892	24.9321	24.3461
Q2FWA2	Q2FWA2	SAOUHSC_02396			catalytic activity;hydrolase activity			32.298	22	77.9	17500000000	467	+	1.49222	0.192019	0.0271728	26.9456	26.8255	26.9604	26.9859	26.5896	26.6956	26.8516	26.8124
Q2FWA8	Q2FWA8	SAOUHSC_02390						40.665	9	18.2	7773700000	218		0.277806	0.0687675	0.449517	26.3075	26.2579	26.2341	26.118	26.3906	26.2259	26.0681	25.9577
Q2FWA9	Q2FWA9	SAOUHSC_02389			cation transmembrane transporter activity;ion transmembrane transporter activity;substrate-specific transmembrane transporter activity;substrate-specific transporter activity;transmembrane transporter activity;transporter activity	cell part;integral to membrane;intrinsic to membrane;membrane part		36.266	1	8.6	256260000	3		0.541721	0.916378	0.236058	21.8846	24.2443	24.1914	21.5196	21.4028	22.4947	22.5641	21.7127
Q2FWB0	Q2FWB0	SAOUHSC_02388		biosynthetic process;cellular biosynthetic process;cellular macromolecule biosynthetic process;cellular macromolecule metabolic process;cellular metabolic process;cellular nitrogen compound metabolic process;cellular process;macromolecule biosynthetic process;macromolecule metabolic process;metabolic process;nitrogen compound metabolic process;nucleic acid metabolic process;nucleobase-containing …	binding;DNA binding;nucleic acid binding;nucleic acid binding transcription factor activity;sequence-specific DNA binding transcription factor activity			11.989	12	99.1	5598900000	231	+	3.28594	0.824317	0.00195604	25.0774	24.8934	24.963	24.9996	24.2594	24.1806	24.3661	23.8301
Q2FWB1	Q2FWB1	SAOUHSC_02387						24.032	14	68.3	2790400000	145	+	2.09937	-0.894344	0.00884615	24.2045	23.8613	23.7319	24.4624	25.2713	24.7593	25.1832	24.6236
Q2FWB5	Q2FWB5	SAOUHSC_02383						52.946	30	70.2	18076000000	718		0.554246	-0.0343585	0.229263	25.8054	25.9044	25.8501	25.8438	25.8528	25.9377	25.8527	25.898
Q2FWB6	Q2FWB6	SAOUHSC_02382						16.254	9	51.8	3703700000	182	+	4.51928	1.62174	0	25.1985	24.9566	25.2861	25.3094	23.7525	23.7344	23.2344	23.5424
Q2FWB7	Q2FWB7	SAOUHSC_02381		biological regulation;cation homeostasis;cellular cation homeostasis;cellular chemical homeostasis;cellular homeostasis;cellular ion homeostasis;cellular iron ion homeostasis;cellular metal ion homeostasis;cellular process;chemical homeostasis;homeostatic process;ion homeostasis;iron ion homeostasis;metal ion homeostasis;regulation of biological quality;response to stimulus;response to stress	binding;catalytic activity;cation binding;ferric iron binding;ion binding;iron ion binding;metal ion binding;oxidoreductase activity;oxidoreductase activity, oxidizing metal ions;transition metal ion binding			16.691	12	96.6	45902000000	440	+	2.96624	1.05145	0.00232099	28.6254	28.2976	28.5705	28.8003	27.6129	27.5397	27.1212	27.8142
Q2FWB8	Q2FWB8	deoD	Purine nucleoside phosphorylase DeoD-type	cellular metabolic process;cellular nitrogen compound metabolic process;cellular process;heterocycle metabolic process;metabolic process;nitrogen compound metabolic process;nucleobase-containing compound metabolic process;nucleobase-containing small molecule metabolic process;nucleoside metabolic process;primary metabolic process;purine nucleoside metabolic process;purine-containing compound meta…	catalytic activity;purine-nucleoside phosphorylase activity;transferase activity;transferase activity, transferring glycosyl groups;transferase activity, transferring pentosyl groups		Nicotinate and nicotinamide metabolism;Purine metabolism;Pyrimidine metabolism	25.908	29	78.8	291050000000	1543	+	3.73407	0.53431	0.000991736	30.6161	30.581	30.5316	30.6239	29.973	29.9282	30.1939	30.1203
Q2FWB9	Q2FWB9	deoC	Deoxyribose-phosphate aldolase	carbohydrate catabolic process;carbohydrate metabolic process;catabolic process;cellular catabolic process;cellular metabolic process;cellular nitrogen compound catabolic process;cellular nitrogen compound metabolic process;cellular process;deoxyribonucleotide catabolic process;deoxyribonucleotide metabolic process;deoxyribose phosphate catabolic process;deoxyribose phosphate metabolic process;me…	aldehyde-lyase activity;carbon-carbon lyase activity;catalytic activity;deoxyribose-phosphate aldolase activity;lyase activity	cell part;cytoplasm;intracellular part	Pentose phosphate pathway	23.327	33	98.6	119580000000	1323	+	3.96235	0.587928	0.000609524	29.1347	28.9093	28.9756	29.0847	28.4301	28.3647	28.5553	28.4026
Q2FWC1	Q2FWC1	pdp	Pyrimidine-nucleoside phosphorylase	cellular aromatic compound metabolic process;cellular metabolic process;cellular nitrogen compound metabolic process;cellular process;heterocycle metabolic process;metabolic process;nitrogen compound metabolic process;nucleobase metabolic process;nucleobase-containing compound metabolic process;nucleobase-containing small molecule metabolic process;nucleoside metabolic process;primary metabolic p…	catalytic activity;phosphorylase activity;pyrimidine-nucleoside phosphorylase activity;transferase activity;transferase activity, transferring glycosyl groups;transferase activity, transferring hexosyl groups;transferase activity, transferring pentosyl groups		Pyrimidine metabolism	46.308	63	93.3	281570000000	2664	+	6.00214	1.17383	0	29.3352	29.3161	29.4311	29.4471	28.1595	28.1212	28.2112	28.3422
Q2FWC3	Q2FWC3	luxS	S-ribosylhomocysteine lyase	biological regulation;homeostasis of number of cells;homeostasis of number of cells in a free-living population;homeostatic process;multi-organism process;quorum sensing;regulation of biological quality	binding;carbon-sulfur lyase activity;catalytic activity;cation binding;ion binding;iron ion binding;lyase activity;metal ion binding;S-ribosylhomocysteine lyase activity;transition metal ion binding		Cysteine and methionine metabolism;Vibrio cholerae pathogenic cycle	17.514	12	55.8	66383000000	582	+	1.80724	0.300678	0.0150362	28.9183	28.6718	28.7808	28.942	28.3522	28.5317	28.6578	28.5686
Q2FWC4	Q2FWC4	SAOUHSC_02374			catalytic activity;hydrolase activity			42.958	7	25.4	1010100000	23		0.308176	0.549567	0.41717	24.1437	23.8399	23.9436	23.7894	23.4958	21.268	24.0382	24.7163
Q2FWC6	Q2FWC6	SAOUHSC_02372						25.855	10	39.5	18486000000	272	+	2.15017	0.338389	0.00777293	28.1797	28.3463	28.348	28.401	27.8221	27.995	27.9464	28.158
Q2FWC7	Q2FWC7	coaW	Type II pantothenate kinase	biosynthetic process;cellular biosynthetic process;cellular metabolic process;cellular nitrogen compound metabolic process;cellular process;coenzyme A biosynthetic process;coenzyme A metabolic process;coenzyme biosynthetic process;coenzyme metabolic process;cofactor biosynthetic process;cofactor metabolic process;heterocycle metabolic process;metabolic process;nitrogen compound metabolic process;…	adenyl nucleotide binding;adenyl ribonucleotide binding;ATP binding;binding;catalytic activity;kinase activity;nucleotide binding;pantothenate kinase activity;phosphotransferase activity, alcohol group as acceptor;purine nucleotide binding;purine ribonucleoside triphosphate binding;purine ribonucleotide binding;ribonucleotide binding;transferase activity;transferase activity, transferring phospho…	cell part;cytoplasm;intracellular part	Pantothenate and CoA biosynthesis	29.097	13	55.4	5789500000	222		0.701508	0.125776	0.164953	25.4216	25.3596	25.4945	25.4371	25.1972	25.355	25.5113	25.1463
Q2FWC9	Q2FWC9	SAOUHSC_02370			acetyltransferase activity;catalytic activity;N-acetyltransferase activity;N-acyltransferase activity;transferase activity;transferase activity, transferring acyl groups;transferase activity, transferring acyl groups other than amino-acyl groups			33.11	15	53.5	5337200000	257	+	1.72816	0.290393	0.0162109	25.5567	25.4865	25.4214	25.1985	25.1721	25.1661	24.9833	25.18
Q2FWD0	Q2FWD0	rpoE	Probable DNA-directed RNA polymerase subunit delta	biological regulation;biosynthetic process;cellular biosynthetic process;cellular macromolecule biosynthetic process;cellular macromolecule metabolic process;cellular metabolic process;cellular nitrogen compound metabolic process;cellular process;macromolecule biosynthetic process;macromolecule metabolic process;metabolic process;nitrogen compound metabolic process;nucleic acid metabolic process;…	catalytic activity;DNA-directed RNA polymerase activity;nucleotidyltransferase activity;RNA polymerase activity;transferase activity;transferase activity, transferring phosphorus-containing groups		Purine metabolism;Pyrimidine metabolism;RNA polymerase	20.881	11	63.6	22812000000	199		1.091	-0.127526	0.0647991	27.8765	27.9727	27.9598	27.839	27.8974	28.0354	28.0902	28.1351
Q2FWD1	Q2FWD1	pyrG	CTP synthase	amine metabolic process;biosynthetic process;carboxylic acid metabolic process;cellular amine metabolic process;cellular amino acid metabolic process;cellular biosynthetic process;cellular ketone metabolic process;cellular metabolic process;cellular nitrogen compound biosynthetic process;cellular nitrogen compound metabolic process;cellular process;CTP biosynthetic process;CTP metabolic process;'…	adenyl nucleotide binding;adenyl ribonucleotide binding;ATP binding;binding;catalytic activity;CTP synthase activity;ligase activity;ligase activity, forming carbon-nitrogen bonds;nucleotide binding;purine nucleotide binding;purine ribonucleoside triphosphate binding;purine ribonucleotide binding;ribonucleotide binding		Pyrimidine metabolism	59.981	48	86.4	100780000000	1235		0.125517	-0.0191207	0.685736	28.7944	28.7755	28.8486	28.932	28.8719	28.8167	28.7639	28.9745
Q2FWD2	Q2FWD2	SAOUHSC_02367						20.164	3	21.4	1373100000	32		1.1317	-0.243739	0.0591079	25.0389	24.963	24.754	24.9276	25.3057	24.977	25.0256	25.3502
Q2FWD3	Q2FWD3	SAOUHSC_02366		alcohol catabolic process;alcohol metabolic process;carbohydrate catabolic process;carbohydrate metabolic process;catabolic process;cellular carbohydrate catabolic process;cellular carbohydrate metabolic process;cellular metabolic process;cellular process;fructose 1,6-bisphosphate metabolic process;fructose metabolic process;generation of precursor metabolites and energy;glucose catabolic process…	aldehyde-lyase activity;binding;carbon-carbon lyase activity;catalytic activity;cation binding;fructose-bisphosphate aldolase activity;ion binding;lyase activity;metal ion binding;transition metal ion binding;zinc ion binding		Carbon fixation in photosynthetic organisms;Fructose and mannose metabolism;Glycolysis / Gluconeogenesis;Methane metabolism;Pentose phosphate pathway	30.836	31	86.7	472990000000	1761		0.411907	-0.062479	0.315754	31.5892	31.5004	31.5617	31.5466	31.4211	31.6494	31.698	31.6794
Q2FWD4	Q2FWD4	murA	UDP-N-acetylglucosamine 1-carboxyvinyltransferase	alcohol biosynthetic process;alcohol metabolic process;amine metabolic process;amino sugar biosynthetic process;amino sugar metabolic process;aminoglycan biosynthetic process;aminoglycan metabolic process;biological regulation;biosynthetic process;carbohydrate biosynthetic process;carbohydrate metabolic process;cell cycle;cell division;cell wall macromolecule biosynthetic process;cell wall macrom…	catalytic activity;transferase activity;transferase activity, transferring alkyl or aryl (other than methyl) groups;UDP-N-acetylglucosamine 1-carboxyvinyltransferase activity	cell part;cytoplasm;intracellular part	Amino sugar and nucleotide sugar metabolism;Peptidoglycan biosynthesis	45.074	33	72.3	29795000000	666	+	2.81017	0.491466	0.00326761	26.9519	26.8485	27.0977	26.752	26.4197	26.5001	26.2782	26.4864
Q2FWD5	Q2FWD5	SAOUHSC_02364						12.686	11	83.8	2321300000	80	+	3.0995	0.295857	0.00207407	25.2528	25.4054	25.2845	25.3673	25.121	25.0191	25.0149	24.9716
Q2FWD6	Q2FWD6	SAOUHSC_02363	Putative aldehyde dehydrogenase SAOUHSC_02363	cellular aldehyde metabolic process;cellular metabolic process;cellular process;metabolic process	aldehyde dehydrogenase (NAD) activity;aldehyde dehydrogenase [NAD(P)+] activity;catalytic activity;oxidoreductase activity;oxidoreductase activity, acting on the aldehyde or oxo group of donors;oxidoreductase activity, acting on the aldehyde or oxo group of donors, NAD or NADP as acceptor		Arginine and proline metabolism;Ascorbate and aldarate metabolism;beta-Alanine metabolism;Chloroalkane and chloroalkene degradation;Fatty acid metabolism;Glycerolipid metabolism;Glycolysis / Gluconeogenesis;Histidine metabolism;Limonene and pinene degradation;Lysine degradation;Pentose and glucuronate interconversions;Propanoate metabolism;Pyruvate metabolism;Tryptophan metabolism;Valine, leucine…	51.968	40	86.1	30701000000	915	+	3.63559	0.738338	0.000916031	27.3691	27.1318	27.4587	27.4408	26.6333	26.4446	26.6787	26.6905
Q2FWD7	Q2FWD7	rho	Transcription termination factor Rho	biological regulation;biosynthetic process;cellular biosynthetic process;cellular macromolecule metabolic process;cellular metabolic process;cellular nitrogen compound metabolic process;cellular process;macromolecule metabolic process;metabolic process;nitrogen compound metabolic process;nucleic acid metabolic process;nucleobase-containing compound metabolic process;primary metabolic process;regu…	adenyl nucleotide binding;adenyl ribonucleotide binding;ATP binding;ATPase activity;ATPase activity, coupled;binding;catalytic activity;helicase activity;hydrolase activity;hydrolase activity, acting on acid anhydrides;hydrolase activity, acting on acid anhydrides, in phosphorus-containing anhydrides;nucleic acid binding;nucleoside-triphosphatase activity;nucleotide binding;purine nucleotide bind…		RNA degradation	49.97	41	71.2	53921000000	1169	+	1.99272	-0.190511	0.0107177	27.1827	27.109	27.2234	27.2791	27.3684	27.3776	27.3172	27.4931
Q2FWD8	Q2FWD8	rpmE2	50S ribosomal protein L31 type B	biosynthetic process;cellular biosynthetic process;cellular macromolecule biosynthetic process;cellular macromolecule metabolic process;cellular metabolic process;cellular process;cellular protein metabolic process;macromolecule biosynthetic process;macromolecule metabolic process;metabolic process;primary metabolic process;protein metabolic process;translation	structural constituent of ribosome;structural molecule activity	cell part;cytoplasmic part;intracellular non-membrane-bounded organelle;intracellular organelle;intracellular part;macromolecular complex;non-membrane-bounded organelle;organelle;ribonucleoprotein complex;ribosome	Ribosome	9.7228	14	100	131840000000	776	+	3.51341	-0.369036	0.00112	29.1974	29.334	29.2995	29.3413	29.6848	29.6782	29.729	29.5564
Q2FWD9	Q2FWD9	tdk	Thymidine kinase	biosynthetic process;cellular biosynthetic process;cellular macromolecule biosynthetic process;cellular macromolecule metabolic process;cellular metabolic process;cellular nitrogen compound metabolic process;cellular process;DNA biosynthetic process;DNA metabolic process;macromolecule biosynthetic process;macromolecule metabolic process;metabolic process;nitrogen compound metabolic process;nuclei…	adenyl nucleotide binding;adenyl ribonucleotide binding;ATP binding;binding;catalytic activity;cation binding;deoxynucleoside kinase activity;ion binding;kinase activity;metal ion binding;nucleobase-containing compound kinase activity;nucleoside kinase activity;nucleotide binding;purine nucleotide binding;purine ribonucleoside triphosphate binding;purine ribonucleotide binding;ribonucleotide bind…	cell part;cytoplasm;intracellular part	Drug metabolism - other enzymes;Pyrimidine metabolism	22.214	12	71.4	11752000000	293	+	2.88779	-0.498997	0.00310266	26.5053	26.4163	26.396	26.6182	26.8197	26.9173	27.0474	27.1473
Q2FWE0	Q2FWE0	prfA	Peptide chain release factor 1		binding;nucleic acid binding;RNA binding;translation factor activity, nucleic acid binding;translation release factor activity;translation release factor activity, codon specific;translation termination factor activity	cell part;cytoplasm;intracellular part		40.349	29	71.8	56517000000	1001	+	5.02431	-0.461577	0	28.283	28.2521	28.2354	28.3188	28.6679	28.7659	28.7935	28.7083
Q2FWE1	Q2FWE1	prmC	Release factor glutamine methyltransferase	cellular macromolecule metabolic process;cellular metabolic process;cellular process;cellular protein metabolic process;macromolecule metabolic process;macromolecule methylation;macromolecule modification;metabolic process;methylation;one-carbon metabolic process;peptidyl-glutamine methylation;primary metabolic process;protein alkylation;protein metabolic process;protein methylation;protein modif…	binding;nucleic acid binding			31.73	4	17.3	393610000	21		0.405822	0.836309	0.320062	23.7448	23.6208	23.3042	23.5892	20.8771	24.2345	21.4789	24.3233
Q2FWE2	Q2FWE2	SAOUHSC_02357	Threonylcarbamoyl-AMP synthase	cellular macromolecule metabolic process;cellular metabolic process;cellular nitrogen compound metabolic process;cellular process;macromolecule metabolic process;metabolic process;ncRNA metabolic process;ncRNA processing;nitrogen compound metabolic process;nucleic acid metabolic process;nucleobase-containing compound metabolic process;primary metabolic process;RNA metabolic process;RNA processing…	adenyl nucleotide binding;adenyl ribonucleotide binding;ATP binding;binding;catalytic activity;double-stranded RNA binding;nucleic acid binding;nucleotide binding;nucleotidyltransferase activity;purine nucleotide binding;purine ribonucleoside triphosphate binding;purine ribonucleotide binding;ribonucleotide binding;RNA binding;transferase activity;transferase activity, transferring phosphorus-con…	cell part;cytoplasm;intracellular part		40.445	10	35.6	1226400000	117	+	2.09693	-0.39492	0.0089467	22.8808	22.7993	22.8524	23.0364	23.0939	23.2628	23.5193	23.2726
Q2FWE3	Q2FWE3	ptpB	Low molecular weight protein-tyrosine-phosphatase PtpB		catalytic activity;hydrolase activity;hydrolase activity, acting on ester bonds;phosphatase activity;phosphoprotein phosphatase activity;phosphoric ester hydrolase activity;protein tyrosine phosphatase activity			15.788	3	36.7	306650000	19		0.699986	-0.345368	0.165127	22.8361	22.9552	23.0871	22.8952	22.6864	23.4843	23.2004	23.7841
Q2FWE4	Q2FWE4	SAOUHSC_02355	UPF0340 protein SAOUHSC_02355					18.895	6	35.1	2399500000	87		0.591977	0.192456	0.207195	24.2966	24.5277	24.1632	24.5727	24.0307	24.1232	24.5493	24.0872
Q2FWE5	Q2FWE5	glyA	Serine hydroxymethyltransferase	amine biosynthetic process;amine metabolic process;biosynthetic process;carboxylic acid biosynthetic process;carboxylic acid metabolic process;cellular amine metabolic process;cellular amino acid biosynthetic process;cellular amino acid metabolic process;cellular aromatic compound metabolic process;cellular biosynthetic process;cellular ketone metabolic process;cellular metabolic process;cellular…	binding;catalytic activity;cofactor binding;glycine hydroxymethyltransferase activity;hydroxymethyl-, formyl- and related transferase activity;pyridoxal phosphate binding;transferase activity;transferase activity, transferring one-carbon groups;vitamin B6 binding;vitamin binding	cell part;cytoplasm;intracellular part	Cyanoamino acid metabolism;Glycine, serine and threonine metabolism;Methane metabolism;One carbon pool by folate	45.172	43	69.7	83441000000	1115	+	1.89569	-0.224378	0.0130687	27.8901	27.9127	28.0119	28.0294	28.2065	28.0752	28.1353	28.3246
Q2FWE6	Q2FWE6	upp	Uracil phosphoribosyltransferase	biosynthetic process;cellular aromatic compound metabolic process;cellular biosynthetic process;cellular metabolic compound salvage;cellular metabolic process;cellular nitrogen compound biosynthetic process;cellular nitrogen compound metabolic process;cellular process;heterocycle biosynthetic process;heterocycle metabolic process;metabolic process;nitrogen compound metabolic process;nucleobase me…	binding;catalytic activity;cation binding;GTP binding;guanyl nucleotide binding;guanyl ribonucleotide binding;ion binding;magnesium ion binding;metal ion binding;nucleotide binding;purine nucleotide binding;purine ribonucleoside triphosphate binding;purine ribonucleotide binding;ribonucleotide binding;transferase activity;transferase activity, transferring glycosyl groups;transferase activity, tr…		Pyrimidine metabolism	23.05	35	96.2	140530000000	1163		0.369527	0.0382791	0.349388	29.0097	28.9404	29.049	29.0365	28.9463	28.8742	29.0303	29.0317
Q2FWE7	Q2FWE7	atpH	ATP synthase subunit delta	ATP biosynthetic process;ATP metabolic process;ATP synthesis coupled proton transport;biosynthetic process;cation transport;cellular biosynthetic process;cellular metabolic process;cellular nitrogen compound biosynthetic process;cellular nitrogen compound metabolic process;cellular process;energy coupled proton transport, down electrochemical gradient;establishment of localization;heterocycle bio…	cation transmembrane transporter activity;hydrogen ion transmembrane transporter activity;hydrogen ion transporting ATP synthase activity, rotational mechanism;inorganic cation transmembrane transporter activity;ion transmembrane transporter activity;monovalent inorganic cation transmembrane transporter activity;substrate-specific transmembrane transporter activity;substrate-specific transporter …	cell part;intracellular part;macromolecular complex;membrane;membrane part;plasma membrane;protein complex;proton-transporting ATP synthase complex, catalytic core F(1);proton-transporting two-sector ATPase complex, catalytic domain	Oxidative phosphorylation;Photosynthesis	20.498	26	97.2	75020000000	837		0.859416	0.13485	0.115406	28.9744	29.0436	28.8366	29.1282	28.7308	28.8387	28.9332	28.9407
Q2FWE8	Q2FWE8	atpA	ATP synthase subunit alpha	ATP biosynthetic process;ATP hydrolysis coupled proton transport;ATP metabolic process;ATP synthesis coupled proton transport;biosynthetic process;cation transport;cellular biosynthetic process;cellular metabolic process;cellular nitrogen compound biosynthetic process;cellular nitrogen compound metabolic process;cellular process;energy coupled proton transport, against electrochemical gradient;en…	active transmembrane transporter activity;adenyl nucleotide binding;adenyl ribonucleotide binding;ATP binding;ATPase activity;ATPase activity, coupled;ATPase activity, coupled to movement of substances;ATPase activity, coupled to transmembrane movement of ions;ATPase activity, coupled to transmembrane movement of substances;binding;catalytic activity;cation transmembrane transporter activity;cati…	cell part;intracellular part;macromolecular complex;membrane;membrane part;plasma membrane;protein complex;proton-transporting ATP synthase complex, catalytic core F(1);proton-transporting two-sector ATPase complex, catalytic domain	Oxidative phosphorylation;Photosynthesis	54.583	47	53.6	390200000000	1715	+	1.22049	0.140643	0.0491882	30.2297	30.2597	30.2637	30.3963	30.0434	30.143	30.1245	30.2761
Q2FWE9	Q2FWE9	atpG	ATP synthase gamma chain	ATP biosynthetic process;ATP metabolic process;ATP synthesis coupled proton transport;biosynthetic process;cation transport;cellular biosynthetic process;cellular metabolic process;cellular nitrogen compound biosynthetic process;cellular nitrogen compound metabolic process;cellular process;energy coupled proton transport, down electrochemical gradient;establishment of localization;heterocycle bio…	active transmembrane transporter activity;adenyl nucleotide binding;adenyl ribonucleotide binding;ATP binding;ATPase activity;ATPase activity, coupled;ATPase activity, coupled to movement of substances;ATPase activity, coupled to transmembrane movement of ions;ATPase activity, coupled to transmembrane movement of substances;binding;catalytic activity;cation transmembrane transporter activity;cati…	cell part;intracellular part;macromolecular complex;membrane;membrane part;plasma membrane;protein complex;proton-transporting ATP synthase complex, catalytic core F(1);proton-transporting two-sector ATPase complex, catalytic domain	Oxidative phosphorylation;Photosynthesis	29.474	27	80	94973000000	1162	+	1.59817	0.0583539	0.0220351	28.4903	28.5343	28.4628	28.4851	28.4134	28.4716	28.4315	28.4225
Q2FWF0	Q2FWF0	atpD	ATP synthase subunit beta	ATP biosynthetic process;ATP hydrolysis coupled proton transport;ATP metabolic process;ATP synthesis coupled proton transport;biosynthetic process;cation transport;cellular biosynthetic process;cellular metabolic process;cellular nitrogen compound biosynthetic process;cellular nitrogen compound metabolic process;cellular process;energy coupled proton transport, against electrochemical gradient;en…	adenyl nucleotide binding;adenyl ribonucleotide binding;ATP binding;binding;cation transmembrane transporter activity;hydrogen ion transmembrane transporter activity;hydrogen ion transporting ATP synthase activity, rotational mechanism;inorganic cation transmembrane transporter activity;ion transmembrane transporter activity;monovalent inorganic cation transmembrane transporter activity;nucleotid…	cell part;intracellular part;macromolecular complex;membrane;membrane part;plasma membrane;protein complex;proton-transporting ATP synthase complex, catalytic core F(1);proton-transporting two-sector ATPase complex, catalytic domain	Oxidative phosphorylation;Photosynthesis	51.4	65	98.3	615450000000	3196	+	1.28601	0.147314	0.0419387	30.5256	30.6577	30.5187	30.6449	30.3459	30.4719	30.3805	30.5593
Q2FWF1	Q2FWF1	atpC	ATP synthase epsilon chain	ATP biosynthetic process;ATP metabolic process;ATP synthesis coupled proton transport;biosynthetic process;cation transport;cellular biosynthetic process;cellular metabolic process;cellular nitrogen compound biosynthetic process;cellular nitrogen compound metabolic process;cellular process;energy coupled proton transport, down electrochemical gradient;establishment of localization;heterocycle bio…	active transmembrane transporter activity;adenyl nucleotide binding;adenyl ribonucleotide binding;ATP binding;ATPase activity;ATPase activity, coupled;ATPase activity, coupled to movement of substances;ATPase activity, coupled to transmembrane movement of ions;ATPase activity, coupled to transmembrane movement of substances;binding;catalytic activity;cation transmembrane transporter activity;cati…	cell part;intracellular part;macromolecular complex;membrane;membrane part;plasma membrane;protein complex;proton-transporting ATP synthase complex, catalytic core F(1);proton-transporting two-sector ATPase complex, catalytic domain	Oxidative phosphorylation;Photosynthesis	14.844	22	86.6	24436000000	516		0.471013	-0.0917759	0.27569	27.4867	27.6682	27.64	27.6346	27.6778	27.7899	27.8407	27.4882
Q2FWF4	Q2FWF4	murA	UDP-N-acetylglucosamine 1-carboxyvinyltransferase	alcohol biosynthetic process;alcohol metabolic process;amine metabolic process;amino sugar biosynthetic process;amino sugar metabolic process;aminoglycan biosynthetic process;aminoglycan metabolic process;biological regulation;biosynthetic process;carbohydrate biosynthetic process;carbohydrate metabolic process;cell cycle;cell division;cell wall macromolecule biosynthetic process;cell wall macrom…	catalytic activity;transferase activity;transferase activity, transferring alkyl or aryl (other than methyl) groups;UDP-N-acetylglucosamine 1-carboxyvinyltransferase activity	cell part;cytoplasm;intracellular part	Amino sugar and nucleotide sugar metabolism;Peptidoglycan biosynthesis	44.94	38	92.4	31522000000	757		0.211128	0.0194407	0.53805	27.5091	27.3896	27.4479	27.3575	27.4238	27.3791	27.4402	27.3832
Q2FWF5	Q2FWF5	fabZ	3-hydroxyacyl-[acyl-carrier-protein] dehydratase FabZ	biosynthetic process;carboxylic acid biosynthetic process;carboxylic acid metabolic process;cellular biosynthetic process;cellular ketone metabolic process;cellular lipid metabolic process;cellular metabolic process;cellular process;fatty acid biosynthetic process;fatty acid metabolic process;glycolipid biosynthetic process;glycolipid metabolic process;lipid A biosynthetic process;lipid A metabol…	3-hydroxyacyl-[acyl-carrier-protein] dehydratase activity;3-hydroxyoctanoyl-[acyl-carrier-protein] dehydratase activity;carbon-oxygen lyase activity;catalytic activity;hydro-lyase activity;lyase activity	cell part;cytoplasm;intracellular part	Fatty acid biosynthesis	16.081	9	51.4	4338900000	203		0.455721	0.261362	0.285177	25.3249	25.5665	25.9057	25.1374	24.7776	25.5882	25.0029	25.5205
Q2FWF6	Q2FWF6	SAOUHSC_02335						19.422	6	43.1	3794600000	76		1.18721	0.407015	0.0531407	25.4878	25.2461	25.7007	25.487	25.3163	24.6256	25.1169	25.2345
Q2FWG1	Q2FWG1	SAOUHSC_02330		aromatic compound biosynthetic process;biosynthetic process;cellular aromatic compound metabolic process;cellular biosynthetic process;cellular metabolic process;cellular nitrogen compound biosynthetic process;cellular nitrogen compound metabolic process;cellular process;heterocycle biosynthetic process;heterocycle metabolic process;metabolic process;nitrogen compound metabolic process;small mole…	adenyl nucleotide binding;adenyl ribonucleotide binding;ATP binding;binding;catalytic activity;kinase activity;nucleotide binding;phosphomethylpyrimidine kinase activity;phosphotransferase activity, phosphate group as acceptor;purine nucleotide binding;purine ribonucleoside triphosphate binding;purine ribonucleotide binding;ribonucleotide binding;transferase activity;transferase activity, transfe…		Thiamine metabolism	30.228	6	26.4	585160000	51	+	2.51227	1.10823	0.00544225	23.8123	23.1929	24.0198	23.253	22.6021	22.268	22.2828	22.6922
Q2FWG2	Q2FWG2	thiM	Hydroxyethylthiazole kinase	aromatic compound biosynthetic process;biosynthetic process;cellular aromatic compound metabolic process;cellular biosynthetic process;cellular metabolic process;cellular nitrogen compound biosynthetic process;cellular nitrogen compound metabolic process;cellular process;coenzyme biosynthetic process;coenzyme metabolic process;cofactor biosynthetic process;cofactor metabolic process;heterocycle b…	adenyl nucleotide binding;adenyl ribonucleotide binding;ATP binding;binding;catalytic activity;cation binding;hydroxyethylthiazole kinase activity;ion binding;kinase activity;magnesium ion binding;metal ion binding;nucleotide binding;phosphotransferase activity, alcohol group as acceptor;purine nucleotide binding;purine ribonucleoside triphosphate binding;purine ribonucleotide binding;ribonucleot…		Thiamine metabolism	28.09	5	31.6	842490000	18	+	5.10023	4.04053	0	25.1189	25.1609	24.9095	25.5155	21.2965	21.6432	20.4216	21.1814
Q2FWG4	Q2FWG4	yidC	Membrane protein insertase YidC	cellular localization;cellular macromolecule localization;cellular process;cellular protein localization;establishment of localization;establishment of protein localization;localization;localization within membrane;macromolecule localization;protein insertion into membrane;protein localization;protein transport;transport		cell part;integral to membrane;intrinsic to membrane;membrane;membrane part;plasma membrane	Bacterial secretion system;Protein export	33.581	8	15.2	4301400000	255		0.0636362	-0.0328999	0.825938	25.1216	25.2027	25.1397	25.1129	25.2893	25.1901	24.6792	25.5499
Q2FWG7	Q2FWG7	SAOUHSC_02324						24.634	5	32.1	785130000	88		0.761036	-0.168266	0.143385	22.3491	22.7022	22.6538	22.4444	22.5451	22.6704	22.8789	22.7282
Q2FWG8	Q2FWG8	SAOUHSC_02323	Cardiolipin synthase	biosynthetic process;cardiolipin biosynthetic process;cardiolipin metabolic process;cellular biosynthetic process;cellular lipid metabolic process;cellular metabolic process;cellular process;glycerolipid biosynthetic process;glycerolipid metabolic process;glycerophospholipid biosynthetic process;glycerophospholipid metabolic process;lipid biosynthetic process;lipid metabolic process;metabolic pro…	cardiolipin synthase activity;catalytic activity;phosphatidyltransferase activity;phosphotransferase activity, for other substituted phosphate groups;transferase activity;transferase activity, transferring phosphorus-containing groups	cell part;integral to membrane;intrinsic to membrane;membrane;membrane part;plasma membrane	Glycerophospholipid metabolism	56.517	9	16.6	1014700000	55		0.0680773	0.0226202	0.814465	22.7559	23.202	22.8433	23.0586	22.9084	23.0445	22.7835	23.033
Q2FWG9	Q2FWG9	SAOUHSC_02322						11.198	10	76.3	3007600000	121	+	1.51341	-0.33145	0.0266006	24.3001	24.3959	24.0992	24.0402	24.5628	24.5698	24.7145	24.3141
Q2FWH0	Q2FWH0	SAOUHSC_02321		cation transport;establishment of localization;ion transport;metal ion transport;transport	binding;cation binding;ion binding;metal ion binding			7.8437	1	34.8	2064000000	28		0.643075	-0.288857	0.186248	25.9218	26.606	25.8548	25.7452	26.1397	26.2751	26.2959	26.5725
Q2FWH1	Q2FWH1	SAOUHSC_02320						5.07	2	68.9	242870000	26		0.418331	-0.16132	0.311417	22.2284	22.3368	22.3345	22.8289	22.6233	22.8122	22.6324	22.3059
Q2FWH3	Q2FWH3	ddl	D-alanine--D-alanine ligase	amine metabolic process;aminoglycan biosynthetic process;aminoglycan metabolic process;biological regulation;biosynthetic process;carbohydrate biosynthetic process;carbohydrate metabolic process;cell wall macromolecule biosynthetic process;cell wall macromolecule metabolic process;cell wall organization;cell wall organization or biogenesis;cellular biosynthetic process;cellular cell wall macromol…	acid-amino acid ligase activity;adenyl nucleotide binding;adenyl ribonucleotide binding;ATP binding;binding;catalytic activity;cation binding;D-alanine-D-alanine ligase activity;ion binding;ligase activity;ligase activity, forming carbon-nitrogen bonds;magnesium ion binding;manganese ion binding;metal ion binding;nucleotide binding;purine nucleotide binding;purine ribonucleoside triphosphate bind…	cell part;cytoplasm;intracellular part	D-Alanine metabolism;Peptidoglycan biosynthesis	40.23	28	74.4	37088000000	629	+	2.63607	0.580751	0.004	27.2275	27.0044	27.4653	27.1335	26.6046	26.516	26.5866	26.8005
Q2FWH4	Q2FWH4	SAOUHSC_02317	UDP-N-acetylmuramoyl-tripeptide--D-alanyl-D-alanine ligase	amine metabolic process;aminoglycan biosynthetic process;aminoglycan metabolic process;biological regulation;biosynthetic process;carbohydrate biosynthetic process;carbohydrate metabolic process;cell cycle;cell division;cell wall macromolecule biosynthetic process;cell wall macromolecule metabolic process;cell wall organization;cell wall organization or biogenesis;cellular biosynthetic process;ce…	acid-amino acid ligase activity;adenyl nucleotide binding;adenyl ribonucleotide binding;ATP binding;binding;catalytic activity;ligase activity;ligase activity, forming carbon-nitrogen bonds;nucleotide binding;purine nucleotide binding;purine ribonucleoside triphosphate binding;purine ribonucleotide binding;ribonucleotide binding;UDP-N-acetylmuramoylalanyl-D-glutamyl-2,6-diaminopimelate-D-alanyl-D…	cell part;cytoplasm;intracellular part	Lysine biosynthesis;Peptidoglycan biosynthesis	50.052	21	50.7	24396000000	507	+	1.47656	0.128945	0.0286176	27.1293	27.0467	27.1906	27.0246	26.9078	26.9479	27.0357	26.9839
Q2FWH5	Q2FWH5	cshA	DEAD-box ATP-dependent RNA helicase CshA	catabolic process;cellular catabolic process;cellular macromolecule catabolic process;cellular macromolecule metabolic process;cellular metabolic process;cellular nitrogen compound metabolic process;cellular process;macromolecule catabolic process;macromolecule metabolic process;metabolic process;nitrogen compound metabolic process;nucleic acid metabolic process;nucleobase-containing compound met…	adenyl nucleotide binding;adenyl ribonucleotide binding;ATP binding;ATPase activity;ATPase activity, coupled;ATP-dependent helicase activity;ATP-dependent RNA helicase activity;binding;catalytic activity;helicase activity;hydrolase activity;hydrolase activity, acting on acid anhydrides;hydrolase activity, acting on acid anhydrides, in phosphorus-containing anhydrides;nucleic acid binding;nucleosi…	cell part;cytoplasm;intracellular part		56.942	45	72.5	62628000000	1073		0.935436	-0.410397	0.0955623	27.5713	27.4261	27.6206	27.4341	27.9928	28.1554	27.2896	28.256
Q2FWH6	Q2FWH6	SAOUHSC_02315		biological regulation;biosynthetic process;cellular biosynthetic process;cellular macromolecule biosynthetic process;cellular macromolecule metabolic process;cellular metabolic process;cellular nitrogen compound metabolic process;cellular process;cellular response to stimulus;macromolecule biosynthetic process;macromolecule metabolic process;metabolic process;nitrogen compound metabolic process;n…	binding;DNA binding;nucleic acid binding		Two-component system	26.511	3	9.1	133800000	13		0.427308	0.473999	0.304839	22.412	22.5727	21.1444	21.0308	20.6415	21.6058	21.1107	21.9059
Q2FWI2	Q2FWI2	SAOUHSC_02309						18.972	6	50.3	1103500000	79		0.562366	0.168627	0.224319	23.836	24.0726	23.7074	24.0025	23.9077	23.4331	23.6916	23.9115
Q2FWI3	Q2FWI3	SAOUHSC_02308						60.745	8	17.6	2029900000	85		0.50465	0.12248	0.256183	25.1967	25.0116	25.0398	25.2424	25.0063	24.7816	24.9667	25.2459
Q2FWI4	Q2FWI4	SAOUHSC_02307						19.405	4	27	1027000000	70		0.472705	-0.170439	0.274354	23.2002	23.1653	22.8272	23.565	23.3155	23.5331	23.353	23.2379
Q2FWI8	Q2FWI8	mazF	mRNA interferase MazF		binding;catalytic activity;DNA binding;endonuclease activity;hydrolase activity;hydrolase activity, acting on ester bonds;nuclease activity;nucleic acid binding;RNA binding			13.442	6	47.5	1843600000	108		0.574568	-0.117582	0.217514	24.029	24.2078	24.3038	24.3284	24.1364	24.4329	24.4085	24.3616
Q2FWJ3	Q2FWJ3	rsbW	Serine-protein kinase RsbW	biological regulation;negative regulation of biological process;negative regulation of biosynthetic process;negative regulation of cellular biosynthetic process;negative regulation of cellular macromolecule biosynthetic process;negative regulation of cellular metabolic process;negative regulation of cellular process;negative regulation of gene expression;negative regulation of macromolecule biosy…	adenyl nucleotide binding;adenyl ribonucleotide binding;ATP binding;binding;catalytic activity;kinase activity;nucleotide binding;phosphotransferase activity, alcohol group as acceptor;protein binding transcription factor activity;protein kinase activity;protein serine/threonine kinase activity;purine nucleotide binding;purine ribonucleoside triphosphate binding;purine ribonucleotide binding;ribo…			17.921	15	84.9	18498000000	395	+	2.93693	-0.438546	0.00285259	26.5228	26.5246	26.4203	26.7285	27.1029	26.968	26.9543	26.9252
Q2FWJ4	Q2FWJ4	SAOUHSC_02298	RNA polymerase sigma factor	biosynthetic process;cellular biosynthetic process;cellular macromolecule metabolic process;cellular metabolic process;cellular nitrogen compound metabolic process;cellular process;macromolecule metabolic process;metabolic process;nitrogen compound metabolic process;nucleic acid metabolic process;nucleobase-containing compound metabolic process;primary metabolic process;RNA biosynthetic process;R…	binding;core DNA-dependent RNA polymerase binding promoter specificity activity;core RNA polymerase binding transcription factor activity;DNA binding;nucleic acid binding;nucleic acid binding transcription factor activity;protein binding transcription factor activity;sequence-specific DNA binding transcription factor activity;sigma factor activity		RNA polymerase	29.443	6	23.4	806970000	22		0.67793	-0.59152	0.172805	22.7941	22.325	23.3284	23.039	23.0318	22.7089	24.312	23.7998
Q2FWJ5	Q2FWJ5	SAOUHSC_02297		cellular metabolic process;cellular nitrogen compound metabolic process;cellular process;metabolic process;nitrogen compound metabolic process;nucleobase-containing compound metabolic process;primary metabolic process	binding;nucleic acid binding			80.934	54	69.6	32069000000	1312		0.632217	0.078938	0.191016	26.029	25.9317	26.1013	26.049	25.9104	25.8711	25.9255	26.0881
Q2FWK4	Q2FWK4	ilvC	Ketol-acid reductoisomerase	amine biosynthetic process;amine metabolic process;biosynthetic process;branched chain family amino acid biosynthetic process;branched chain family amino acid metabolic process;carboxylic acid biosynthetic process;carboxylic acid metabolic process;cellular amine metabolic process;cellular amino acid biosynthetic process;cellular amino acid metabolic process;cellular biosynthetic process;cellular …	binding;catalytic activity;coenzyme binding;cofactor binding;ketol-acid reductoisomerase activity;oxidoreductase activity;oxidoreductase activity, acting on CH-OH group of donors;oxidoreductase activity, acting on the CH-OH group of donors, NAD or NADP as acceptor		Pantothenate and CoA biosynthesis;Valine, leucine and isoleucine biosynthesis	36.955	9	33.8	194760000	30		0.598205	-0.432207	0.204736	21.3992	20.7586	21.4428	20.6988	22.0516	21.019	21.9141	21.0435
Q2FWK9	Q2FWK9	SAOUHSC_02280		adenosine metabolic process;cellular macromolecule metabolic process;cellular metabolic process;cellular nitrogen compound metabolic process;cellular process;heterocycle metabolic process;macromolecule metabolic process;macromolecule modification;metabolic process;ncRNA metabolic process;ncRNA processing;nitrogen compound metabolic process;nucleic acid metabolic process;nucleobase-containing comp…				16.441	5	43.8	1631200000	77		0.182334	-0.0524106	0.582635	24.7671	24.5176	24.7989	24.6971	24.8147	24.8071	24.4748	24.8937
Q2FWL0	Q2FWL0	SAOUHSC_02279		adenosine metabolic process;cellular macromolecule metabolic process;cellular metabolic process;cellular nitrogen compound metabolic process;cellular process;heterocycle metabolic process;macromolecule metabolic process;macromolecule modification;metabolic process;ncRNA metabolic process;ncRNA processing;nitrogen compound metabolic process;nucleic acid metabolic process;nucleobase-containing comp…				24.536	9	33.2	773240000	72		0.667206	0.0797324	0.17625	23.579	23.5956	23.4026	23.4215	23.3411	23.4316	23.4464	23.4606
Q2FWL2	Q2FWL2	tsaD	tRNA N6-adenosine threonylcarbamoyltransferase	adenosine metabolic process;cellular macromolecule metabolic process;cellular metabolic process;cellular nitrogen compound metabolic process;cellular process;heterocycle metabolic process;macromolecule metabolic process;macromolecule modification;metabolic process;ncRNA metabolic process;ncRNA processing;nitrogen compound metabolic process;nucleic acid metabolic process;nucleobase-containing comp…	binding;catalytic activity;cation binding;endopeptidase activity;hydrolase activity;ion binding;iron ion binding;metal ion binding;metalloendopeptidase activity;metallopeptidase activity;peptidase activity;peptidase activity, acting on L-amino acid peptides;transferase activity;transferase activity, transferring acyl groups;transferase activity, transferring acyl groups other than amino-acyl grou…	cell part;cytoplasm;intracellular part		36.818	15	53.4	5265600000	287	+	1.82159	-0.249321	0.0146252	25.0333	25.0207	24.9523	25.0939	25.2043	25.3813	25.117	25.395
Q2FWL3	Q2FWL3	SAOUHSC_02276		cellular macromolecule metabolic process;cellular metabolic process;cellular nitrogen compound metabolic process;cellular process;cellular response to stimulus;cellular response to stress;DNA metabolic process;DNA repair;macromolecule metabolic process;metabolic process;mismatch repair;nitrogen compound metabolic process;nucleic acid metabolic process;nucleobase-containing compound metabolic proc…	adenyl nucleotide binding;adenyl ribonucleotide binding;ATP binding;binding;DNA binding;double-stranded DNA binding;mismatched DNA binding;nucleic acid binding;nucleotide binding;purine nucleotide binding;purine ribonucleoside triphosphate binding;purine ribonucleotide binding;ribonucleotide binding;structure-specific DNA binding			61.321	16	27.4	2184800000	163	+	2.19117	-1.17265	0.00775785	23.7927	23.3542	22.8911	24.1291	24.4713	24.6518	24.9406	24.794
Q2FWL5	Q2FWL5	SAOUHSC_02274			adenyl nucleotide binding;adenyl ribonucleotide binding;ATP binding;ATPase activity;binding;catalytic activity;hydrolase activity;hydrolase activity, acting on acid anhydrides;hydrolase activity, acting on acid anhydrides, in phosphorus-containing anhydrides;nucleoside-triphosphatase activity;nucleotide binding;purine nucleotide binding;purine ribonucleoside triphosphate binding;purine ribonucleo…			74.46	29	47.7	6298700000	333		0.90159	0.137162	0.103498	24.2073	24.1301	24.3224	24.3278	24.1582	24.0716	23.9632	24.2459
Q2FWL6	Q2FWL6	rex	Redox-sensing transcriptional repressor Rex	biological regulation;biosynthetic process;cellular biosynthetic process;cellular macromolecule biosynthetic process;cellular macromolecule metabolic process;cellular metabolic process;cellular nitrogen compound metabolic process;cellular process;macromolecule biosynthetic process;macromolecule metabolic process;metabolic process;negative regulation of biological process;negative regulation of bi…	binding;coenzyme binding;cofactor binding;DNA binding;nucleic acid binding;nucleic acid binding transcription factor activity;sequence-specific DNA binding transcription factor activity	cell part;cytoplasm;intracellular part		23.599	19	75.4	15896000000	248	+	2.82659	0.621808	0.00333813	27.8855	27.7046	27.9483	27.9819	27.4241	27.1458	27.0513	27.4118
Q2FWM0	Q2FWM0	SAOUHSC_02269		biosynthetic process;cellular biosynthetic process;cellular macromolecule biosynthetic process;cellular macromolecule metabolic process;cellular metabolic process;cellular nitrogen compound metabolic process;cellular process;macromolecule biosynthetic process;macromolecule metabolic process;metabolic process;nitrogen compound metabolic process;nucleic acid metabolic process;nucleobase-containing …	binding;DNA binding;nucleic acid binding;nucleic acid binding transcription factor activity;sequence-specific DNA binding transcription factor activity			35.499	9	32	2077300000	117		0.203391	-0.0587745	0.549737	24.6014	24.6799	24.5648	24.8254	24.8912	24.4439	24.8261	24.7453
Q2FWM1	Q2FWM1	SAOUHSC_02268		carbohydrate metabolic process;metabolic process;primary metabolic process	alpha-glucosidase activity;beta-fructofuranosidase activity;catalytic activity;glucosidase activity;hydrolase activity;hydrolase activity, acting on glycosyl bonds;hydrolase activity, hydrolyzing O-glycosyl compounds;sucrose alpha-glucosidase activity	cell part;cytoplasm;intracellular part	Galactose metabolism;Starch and sucrose metabolism	57.927	23	44.1	4666700000	293	+	2.23468	0.191793	0.00757407	24.0309	24.1046	24.2392	24.0794	23.9283	23.8894	23.9345	23.9347
Q2FWM2	Q2FWM2	SAOUHSC_02267			catalytic activity;kinase activity;phosphotransferase activity, alcohol group as acceptor;transferase activity;transferase activity, transferring phosphorus-containing groups		Amino sugar and nucleotide sugar metabolism;Fructose and mannose metabolism;Starch and sucrose metabolism	34.991	7	45.1	2529300000	125		0.930268	0.2811	0.0964138	25.0587	25.1039	25.252	24.6673	24.4854	24.7887	24.7737	24.9098
Q2FWM4	Q2FWM4	SAOUHSC_02265		biological regulation;cellular process;cellular response to stimulus;regulation of biological process;regulation of cellular process;response to stimulus;signal transduction;two-component signal transduction system (phosphorelay)	binding;DNA binding;nucleic acid binding		Two-component system	24.253	24	63.5	29332000000	344	+	2.87472	-1.53508	0.00327273	24.989	24.9671	24.9394	23.9021	26.3795	26.243	26.2217	26.0937
Q2FWM5	Q2FWM5	SAOUHSC_02264			binding;catalytic activity;identical protein binding;kinase activity;molecular transducer activity;phosphotransferase activity, alcohol group as acceptor;phosphotransferase activity, nitrogenous group as acceptor;protein binding;protein histidine kinase activity;protein kinase activity;signal transducer activity;transferase activity;transferase activity, transferring phosphorus-containing groups;…	cell part;membrane	Two-component system	47.983	6	19.6	1223500000	70	+	2.52057	-1.86069	0.00537892	21.2506	22.2886	20.9731	22.4105	23.4922	23.4165	24.0033	23.4536
Q2FWM7	Q2FWM7	agrB	Accessory gene regulator protein B	biological regulation;homeostasis of number of cells;homeostasis of number of cells in a free-living population;homeostatic process;multi-organism process;pathogenesis;quorum sensing;regulation of biological quality	catalytic activity;hydrolase activity;peptidase activity	cell part;integral to membrane;intrinsic to membrane;membrane;membrane part;plasma membrane	Two-component system	21.929	2	9.5	596070000	34	+	1.68301	-2.0507	0.0174191	22.7757	22.2851	21.3163	19.7939	23.5355	23.7259	23.547	23.5656
Q2FWM9	Q2FWM9	SAOUHSC_02259		metabolic process;nitrogen compound metabolic process	catalytic activity;hydrolase activity;hydrolase activity, acting on carbon-nitrogen (but not peptide) bonds			29.825	8	33.7	2569000000	113	+	2.21193	0.486267	0.00774603	24.4635	24.3284	24.1913	24.4468	23.6239	23.832	24.1005	23.9285
Q2FWN0	Q2FWN0	SAOUHSC_02258			catalytic activity;oxidoreductase activity			24.004	10	53.4	4812700000	214	+	2.24761	0.432832	0.00745412	24.8042	24.9292	24.7452	25.1502	24.6182	24.3936	24.4707	24.4151
Q2FWN3	Q2FWN3	groS	10 kDa chaperonin	cellular macromolecule metabolic process;cellular metabolic process;cellular process;cellular protein metabolic process;macromolecule metabolic process;metabolic process;primary metabolic process;protein folding;protein metabolic process	adenyl nucleotide binding;adenyl ribonucleotide binding;ATP binding;binding;nucleotide binding;purine nucleotide binding;purine ribonucleoside triphosphate binding;purine ribonucleotide binding;ribonucleotide binding	cell part;cytoplasm;intracellular part		10.416	19	100	27905000000	502	+	2.91605	0.625985	0.00280784	27.6383	27.3209	27.629	27.4305	26.8143	26.9537	26.6999	27.0469
Q2FWN4	Q2FWN4	groL	60 kDa chaperonin	cellular macromolecule metabolic process;cellular metabolic process;cellular process;cellular protein metabolic process;macromolecule metabolic process;metabolic process;primary metabolic process;protein folding;protein metabolic process;protein refolding	adenyl nucleotide binding;adenyl ribonucleotide binding;ATP binding;binding;nucleotide binding;purine nucleotide binding;purine ribonucleoside triphosphate binding;purine ribonucleotide binding;ribonucleotide binding	cell part;cytoplasm;intracellular part	ko05152;RNA degradation;Type I diabetes mellitus	57.664	68	90.1	333720000000	2319	+	3.59875	0.441984	0.000863309	31.0212	30.8214	30.7919	30.9033	30.3976	30.4	30.4996	30.4725
Q2FWN6	Q2FWN6	SAOUHSC_02246					ABC transporters	34.843	9	47.2	1649800000	84	+	2.22549	0.212394	0.00755658	24.1944	24.4258	24.3748	24.2907	24.1128	24.107	24.1232	24.0931
Q2FWN7	Q2FWN7	SAOUHSC_02245		antibiotic biosynthetic process;antibiotic metabolic process;biosynthetic process;cellular biosynthetic process;cellular metabolic process;cellular process;drug metabolic process;metabolic process	catalytic activity;methyltransferase activity;transferase activity;transferase activity, transferring one-carbon groups			33.222	5	22.4	1494100000	8		0.821279	-0.151293	0.126123	25.4762	25.2436	25.4055	25.3482	25.7419	25.5072	25.4359	25.3938
Q2FWN8	Q2FWN8	SAOUHSC_02244			catalytic activity;hydrolase activity;hydrolase activity, acting on carbon-nitrogen (but not peptide) bonds;hydrolase activity, acting on carbon-nitrogen (but not peptide) bonds, in linear amidines;metallopeptidase activity;peptidase activity;peptidase activity, acting on L-amino acid peptides		Lysine biosynthesis	45.097	9	33.9	1549100000	69		0.102174	0.101976	0.734662	22.6055	22.9372	22.6134	22.9727	23.2748	23.2588	22.337	21.8503
Q2FWN9	Q2FWN9	SAOUHSC_02243	Uncharacterized leukocidin-like protein 2	cell killing;cytolysis in other organism;killing of cells of other organism;multi-organism process;pathogenesis		extracellular region	Staphylococcus aureus infection	40.434	47	82.6	79991000000	1299	+	3.13885	0.487822	0.00215385	28.1747	28.1152	28.2252	28.2965	27.5656	27.8721	27.6546	27.7681
Q2FWP0	Q2FWP0	SAOUHSC_02241	Uncharacterized leukocidin-like protein 1	cell killing;cytolysis in other organism;killing of cells of other organism;multi-organism process;pathogenesis		extracellular region	Staphylococcus aureus infection	38.686	44	83.1	46030000000	1118	+	4.90325	0.838171	0	27.7218	27.731	27.8621	27.8119	26.8053	27.0179	26.9074	27.0436
Q2FWP4	Q2FWP4							5.3279	4	56.2	3441600000	151		0.846161	0.229337	0.119196	24.2291	23.9604	24.3902	24.3247	23.9855	24.0421	23.7435	24.216
Q2FWP6	Q2FWP6	SAOUHSC_02235			binding;DNA binding;nucleic acid binding;sequence-specific DNA binding			29.064	11	48	6036300000	184	+	1.53355	-0.189202	0.0251193	25.9538	26.044	26.1839	26.1906	26.2383	26.2466	26.3814	26.2627
Q2FWP9	Q2FWP9	SAOUHSC_02232						20.935	4	34.1	452030000	20		0.212307	-0.147922	0.536769	22.7396	23.5577	23.6594	23.1044	22.9645	23.7983	23.5683	23.3217
Q2FWQ4	Q2FWQ4	SAOUHSC_02226						24.56	3	25.7	95544000	6		0.533632	-0.600245	0.240259	22.2208	20.357	21.2392	21.8739	22.3361	22.7787	21.4777	21.4993
Q2FWR2	Q2FWR2	SAOUHSC_02218						11.1	6	88.2	10405000000	133		0.341728	0.118892	0.378474	27.5324	27.8168	27.2616	27.1879	27.2146	27.3342	27.4092	27.3652
Q2FWU0	Q2FWU0	SAOUHSC_02185						34.938	3	19.9	2536500000	10		0.683419	-0.172146	0.171229	25.8943	25.8307	25.8312	25.7173	26.1189	26.1751	25.6576	26.0105
Q2FWV5	Q2FWV5	chp	Chemotaxis inhibitory protein	multi-organism process;pathogenesis		extracellular region	Staphylococcus aureus infection	17.039	5	44.3	572230000	18		0.181683	-0.145503	0.583204	23.4453	23.0045	23.7871	23.5092	23.523	22.9762	23.5489	24.2799
Q2FWV6	Q2FWV6	scn	Staphylococcal complement inhibitor	multi-organism process;pathogenesis		extracellular region	Staphylococcus aureus infection	13.052	10	51.7	30691000000	213		0.746127	0.230339	0.148278	28.8549	29.0563	29.0793	29.3127	28.581	28.7109	29.0818	29.0081
Q2FWW1	Q2FWW1	SAOUHSC_02161					Staphylococcus aureus infection	65.573	100	88.9	72547000000	1417		0.612467	-0.872234	0.199765	22.1667	24.5502	23.0677	24.6824	23.777	25.1413	24.2648	24.7729
Q2FWW3	Q2FWW3	SAOUHSC_02158		biosynthetic process;metabolic process	binding;catalytic activity;cofactor binding;pyridoxal phosphate binding;vitamin B6 binding;vitamin binding			48.119	23	67.3	29834000000	449		1.18057	0.209022	0.0537528	27.8019	27.625	27.8056	27.6701	27.4815	27.3288	27.535	27.7212
Q2FWW6	Q2FWW6	SAOUHSC_02155		biosynthetic process;cellular biosynthetic process;cellular macromolecule biosynthetic process;cellular macromolecule metabolic process;cellular metabolic process;cellular nitrogen compound metabolic process;cellular process;macromolecule biosynthetic process;macromolecule metabolic process;metabolic process;nitrogen compound metabolic process;nucleic acid metabolic process;nucleobase-containing …	binding;DNA binding;nucleic acid binding;nucleic acid binding transcription factor activity;sequence-specific DNA binding transcription factor activity			14.532	10	61.9	1008400000	87		1.13754	-0.550944	0.0583281	22.2314	21.866	21.9813	21.7273	22.2392	22.1228	22.496	23.1519
Q2FWW7	Q2FWW7	SAOUHSC_02154			adenyl nucleotide binding;adenyl ribonucleotide binding;ATP binding;ATPase activity;binding;catalytic activity;hydrolase activity;hydrolase activity, acting on acid anhydrides;hydrolase activity, acting on acid anhydrides, in phosphorus-containing anhydrides;nucleoside-triphosphatase activity;nucleotide binding;purine nucleotide binding;purine ribonucleoside triphosphate binding;purine ribonucleo…			34.52	11	46.3	1468500000	87		1.1987	-1.56452	0.0519493	22.4785	20.0747	22.4406	20.5496	22.1599	22.9376	23.4063	23.2977
Q2FWW9	Q2FWW9	SAOUHSC_02152			adenyl nucleotide binding;adenyl ribonucleotide binding;ATP binding;ATPase activity;binding;catalytic activity;hydrolase activity;hydrolase activity, acting on acid anhydrides;hydrolase activity, acting on acid anhydrides, in phosphorus-containing anhydrides;nucleoside-triphosphatase activity;nucleotide binding;purine nucleotide binding;purine ribonucleoside triphosphate binding;purine ribonucleo…		ABC transporters	32.952	45	96.2	37385000000	802	+	2.24536	-0.21262	0.0074192	26.0663	25.9335	26.0671	26.1148	26.2426	26.1967	26.3492	26.2437
Q2FWX0	Q2FWX0	SAOUHSC_02151						28.139	2	11.8	165810000	11		0.00342074	-0.00529289	0.990939	22.1874	21.3465	20.4834	21.205	20.1707	21.6715	21.7193	21.6821
Q2FWX1	Q2FWX1	SAOUHSC_02150						21.916	23	84.5	100840000000	719	+	4.75852	0.629213	0	29.1075	29.1042	29.2569	29.0465	28.4832	28.4697	28.5718	28.4736
Q2FWX2	Q2FWX2	SAOUHSC_02149						20.589	11	49.4	34031000000	84		0.0908229	0.0449224	0.759866	28.6506	28.9559	28.647	28.4724	28.8922	28.8361	28.5808	28.2371
Q2FWX3	Q2FWX3	SAOUHSC_02148						18.055	4	31.9	285290000	27		0.47421	0.715763	0.273767	22.859	23.3087	24.0493	23.073	20.7514	23.4668	23.3585	22.8502
Q2FWX4	Q2FWX4	SAOUHSC_02147						31.619	9	45.7	1556600000	158		0.255882	0.0887642	0.474685	23.6534	23.7992	23.4273	23.7354	23.2721	23.4835	23.7593	23.7453
Q2FWX5	Q2FWX5	SAOUHSC_02146			catalytic activity;hydrolase activity;hydrolase activity, acting on carbon-nitrogen (but not peptide) bonds;hydrolase activity, acting on carbon-nitrogen (but not peptide) bonds, in linear amides			40.354	18	46.2	1972900000	167		0.535381	-0.946176	0.239857	21.8061	22.5829	21.5849	20.9146	22.9498	20.4915	23.6423	23.5896
Q2FWX6	Q2FWX6	SAOUHSC_02145						6.5647	5	24.6	13608000000	177		0.992503	0.194082	0.0850844	27.3574	27.3252	27.2135	27.4639	27.0922	27.2081	26.9384	27.3449
Q2FWX8	Q2FWX8	SAOUHSC_02143	Uncharacterized protein SAOUHSC_02143					38.546	22	77.2	19222000000	475		0.129057	0.0358672	0.678123	26.8737	26.8375	26.9294	27.1266	26.8694	26.7501	26.8664	27.1379
Q2FWX9	Q2FWX9	SAOUHSC_02142	Aldehyde dehydrogenase	cellular aldehyde metabolic process;cellular metabolic process;cellular process;metabolic process	aldehyde dehydrogenase [NAD(P)+] activity;catalytic activity;oxidoreductase activity;oxidoreductase activity, acting on the aldehyde or oxo group of donors;oxidoreductase activity, acting on the aldehyde or oxo group of donors, NAD or NADP as acceptor		Arginine and proline metabolism;Ascorbate and aldarate metabolism;beta-Alanine metabolism;Chloroalkane and chloroalkene degradation;Fatty acid metabolism;Glycerolipid metabolism;Glycolysis / Gluconeogenesis;Histidine metabolism;Limonene and pinene degradation;Lysine degradation;Pentose and glucuronate interconversions;Propanoate metabolism;Pyruvate metabolism;Tryptophan metabolism;Valine, leucine…	51.741	31	54.5	12908000000	361	+	2.16841	0.683207	0.00775221	26.155	26.0774	26.3637	25.798	25.0788	25.5904	25.3922	25.5999
Q2FWY1	Q2FWY1	ppaC	Probable manganese-dependent inorganic pyrophosphatase		binding;catalytic activity;cation binding;hydrolase activity;hydrolase activity, acting on acid anhydrides;hydrolase activity, acting on acid anhydrides, in phosphorus-containing anhydrides;inorganic diphosphatase activity;ion binding;manganese ion binding;metal ion binding;pyrophosphatase activity;transition metal ion binding	cell part;cytoplasm;intracellular part	Oxidative phosphorylation	34.068	29	70.6	138450000000	853	+	1.60849	0.148195	0.0212263	30.472	30.3674	30.4898	30.5453	30.2239	30.3509	30.3718	30.3351
Q2FWY2	Q2FWY2	SAOUHSC_02139			catalytic activity;hydrolase activity			21.199	9	47.3	914520000	48	+	1.73084	1.00073	0.0162662	24.3501	24.9859	24.0171	24.0957	22.8113	23.769	23.1932	23.6724
Q2FWY3	Q2FWY3	SAOUHSC_02138						40.719	4	11.2	197460000	5		0.167567	-0.139326	0.606199	21.7853	21.3525	21.4873	22.4128	21.3666	22.0984	21.753	22.377
Q2FWY4	Q2FWY4	sdcS	Sodium-dependent dicarboxylate transporter SdcS	cation transport;establishment of localization;ion transport;metal ion transport;monovalent inorganic cation transport;sodium ion transport;transport	active transmembrane transporter activity;secondary active transmembrane transporter activity;symporter activity;transmembrane transporter activity;transporter activity	cell part;integral to membrane;intrinsic to membrane;membrane;membrane part;plasma membrane		57.171	2	3.5	165840000	8	+	1.43688	-0.721384	0.0300029	20.4002	21.3255	21.3172	20.6422	21.8108	21.9115	21.47	21.3782
Q2FWY6	Q2FWY6	SAOUHSC_02121						45.38	20	66.4	9004300000	375		0.747359	0.172945	0.147965	25.6003	25.6731	25.7433	25.8152	25.6147	25.6248	25.2259	25.6746
Q2FWY8	Q2FWY8	gatC	Aspartyl/glutamyl-tRNA(Asn/Gln) amidotransferase subunit C	biological regulation;biosynthetic process;cellular biosynthetic process;cellular macromolecule biosynthetic process;cellular macromolecule metabolic process;cellular metabolic process;cellular process;cellular protein metabolic process;macromolecule biosynthetic process;macromolecule metabolic process;metabolic process;posttranscriptional regulation of gene expression;primary metabolic process;p…	adenyl nucleotide binding;adenyl ribonucleotide binding;ATP binding;binding;carbon-nitrogen ligase activity, with glutamine as amido-N-donor;catalytic activity;glutaminyl-tRNA synthase (glutamine-hydrolyzing) activity;ligase activity;ligase activity, forming carbon-nitrogen bonds;nucleotide binding;purine nucleotide binding;purine ribonucleoside triphosphate binding;purine ribonucleotide binding;…		Aminoacyl-tRNA biosynthesis	11.267	12	99	28334000000	418		0.796215	-0.215415	0.133391	27.7986	28.0767	28.2195	27.7251	28.2878	28.2584	27.991	28.1443
Q2FWY9	Q2FWY9	gatA	Glutamyl-tRNA(Gln) amidotransferase subunit A	biosynthetic process;cellular biosynthetic process;cellular macromolecule biosynthetic process;cellular macromolecule metabolic process;cellular metabolic process;cellular process;cellular protein metabolic process;macromolecule biosynthetic process;macromolecule metabolic process;metabolic process;primary metabolic process;protein metabolic process;translation	adenyl nucleotide binding;adenyl ribonucleotide binding;ATP binding;binding;carbon-nitrogen ligase activity, with glutamine as amido-N-donor;catalytic activity;glutaminyl-tRNA synthase (glutamine-hydrolyzing) activity;ligase activity;ligase activity, forming carbon-nitrogen bonds;nucleotide binding;purine nucleotide binding;purine ribonucleoside triphosphate binding;purine ribonucleotide binding;…		Aminoacyl-tRNA biosynthesis	52.82	49	74.2	152550000000	1550		0.666155	0.0622172	0.176624	29.2957	29.3622	29.3079	29.3647	29.1946	29.2904	29.2187	29.3779
Q2FWZ0	Q2FWZ0	gatB	Aspartyl/glutamyl-tRNA(Asn/Gln) amidotransferase subunit B	biosynthetic process;cellular biosynthetic process;cellular macromolecule biosynthetic process;cellular macromolecule metabolic process;cellular metabolic process;cellular process;cellular protein metabolic process;macromolecule biosynthetic process;macromolecule metabolic process;metabolic process;primary metabolic process;protein metabolic process;translation	adenyl nucleotide binding;adenyl ribonucleotide binding;ATP binding;binding;carbon-nitrogen ligase activity, with glutamine as amido-N-donor;catalytic activity;glutaminyl-tRNA synthase (glutamine-hydrolyzing) activity;ligase activity;ligase activity, forming carbon-nitrogen bonds;nucleotide binding;purine nucleotide binding;purine ribonucleoside triphosphate binding;purine ribonucleotide binding;…		Aminoacyl-tRNA biosynthesis	53.656	76	94.9	156820000000	2391	+	1.47108	0.12426	0.0290936	29.2253	29.2106	29.323	29.3432	29.1391	29.0969	29.1307	29.2384
Q2FWZ2	Q2FWZ2	dagK	Diacylglycerol kinase	activation of protein kinase activity;activation of protein kinase C activity by G-protein coupled receptor protein signaling pathway;biological regulation;biosynthetic process;cell surface receptor linked signaling pathway;cellular biosynthetic process;cellular lipid metabolic process;cellular metabolic process;cellular process;cellular response to stimulus;G-protein coupled receptor protein sig…	adenyl nucleotide binding;adenyl ribonucleotide binding;ATP binding;binding;catalytic activity;cation binding;diacylglycerol kinase activity;ion binding;kinase activity;metal ion binding;NAD+ kinase activity;nucleotide binding;phosphotransferase activity, alcohol group as acceptor;purine nucleotide binding;purine ribonucleoside triphosphate binding;purine ribonucleotide binding;ribonucleotide bin…			34.886	18	82.9	14115000000	379		1.12333	0.155968	0.0600675	26.5928	26.6328	26.7817	26.6245	26.3774	26.4711	26.4979	26.6615
Q2FWZ3	Q2FWZ3	SAOUHSC_02113		cellular macromolecule metabolic process;cellular metabolic process;cellular nitrogen compound metabolic process;cellular process;macromolecule metabolic process;metabolic process;nitrogen compound metabolic process;nucleic acid metabolic process;nucleobase-containing compound metabolic process;primary metabolic process;RNA metabolic process;RNA processing	4 iron, 4 sulfur cluster binding;binding;catalytic activity;cation binding;ion binding;iron-sulfur cluster binding;metal cluster binding;metal ion binding;methyltransferase activity;nucleic acid binding;RNA binding;RNA methyltransferase activity;transferase activity;transferase activity, transferring one-carbon groups		Histidine metabolism;Polycyclic aromatic hydrocarbon degradation;Tyrosine metabolism	51.682	8	26.5	1001500000	112	+	3.99342	-0.712113	0.000627451	22.6898	22.9472	22.7151	22.9133	23.4665	23.5046	23.6529	23.4898
Q2FWZ6	Q2FWZ6	SAOUHSC_02110			binding;catalytic activity;exonuclease activity;hydrolase activity;hydrolase activity, acting on ester bonds;nuclease activity;nucleic acid binding		DNA replication;Homologous recombination;Mismatch repair;Purine metabolism;Pyrimidine metabolism	21.12	5	44	457080000	48	+	1.52127	1.0723	0.0258582	24.1747	23.3776	24.3681	23.7939	22.7493	23.1848	23.4555	22.0355
Q2FWZ8	Q2FWZ8	ftnA	Bacterial non-heme ferritin	biological regulation;cation homeostasis;cation transport;cellular cation homeostasis;cellular chemical homeostasis;cellular homeostasis;cellular ion homeostasis;cellular iron ion homeostasis;cellular metal ion homeostasis;cellular process;chemical homeostasis;establishment of localization;homeostatic process;ion homeostasis;ion transport;iron ion homeostasis;iron ion transport;metal ion homeosta…	binding;catalytic activity;cation binding;ferric iron binding;ion binding;iron ion binding;metal ion binding;oxidoreductase activity;transition metal ion binding	cell part;cytoplasm;intracellular part	Porphyrin and chlorophyll metabolism	19.588	21	59.6	222080000000	627	+	4.4895	-1.45981	0	28.91	28.8727	28.3723	28.8486	30.1371	30.3072	30.1795	30.219
Q2FWZ9	Q2FWZ9	SAOUHSC_02107		biosynthetic process;metabolic process	adenyl nucleotide binding;adenyl ribonucleotide binding;ATP binding;binding;nucleotide binding;purine nucleotide binding;purine ribonucleoside triphosphate binding;purine ribonucleotide binding;ribonucleotide binding			49.266	44	74.6	24580000000	889		0.602442	0.0376716	0.203044	27.139	27.0777	27.0156	27.0653	27.0278	27.0341	27.0787	27.0062
Q2FX00	Q2FX00	SAOUHSC_02106		biosynthetic process;cellular biosynthetic process;cellular metabolic process;cellular nitrogen compound biosynthetic process;cellular nitrogen compound metabolic process;cellular process;cobalamin biosynthetic process;cobalamin metabolic process;cofactor biosynthetic process;cofactor metabolic process;heterocycle biosynthetic process;heterocycle metabolic process;metabolic process;nitrogen compo…	catalytic activity			27.43	13	67.9	5865000000	223		0.0444553	0.00810575	0.879305	25.3342	25.1478	25.3315	25.17	25.1904	25.3478	25.1776	25.2353
Q2FX03	Q2FX03	SAOUHSC_02103	UPF0421 protein SAOUHSC_02103			cell part;integral to membrane;intrinsic to membrane;membrane;membrane part;plasma membrane		37.435	5	27.4	939620000	11		0.153723	-0.1006	0.629946	24.3532	24.7163	24.7689	24.3494	24.1978	25.0917	24.9657	24.3348
Q2FX05	Q2FX05	map	Methionine aminopeptidase	cellular macromolecule metabolic process;cellular metabolic process;cellular process;cellular protein metabolic process;macromolecule metabolic process;macromolecule modification;metabolic process;primary metabolic process;protein initiator methionine removal;protein metabolic process;protein modification process	aminopeptidase activity;binding;catalytic activity;cation binding;exopeptidase activity;hydrolase activity;ion binding;metal ion binding;metalloaminopeptidase activity;metalloexopeptidase activity;metallopeptidase activity;peptidase activity;peptidase activity, acting on L-amino acid peptides			27.502	15	54.4	15681000000	406		0.440261	0.0914555	0.295981	25.9881	25.9206	25.9835	26.2925	25.8828	25.9147	25.9525	26.0688
Q2FX07	Q2FX07	SAOUHSC_02100				cell part;integral to membrane;intrinsic to membrane;membrane part		27.204	3	23.6	1326500000	108	+	3.12185	1.67483	0.00211321	24.3545	24.2117	24.902	24.1038	23.0456	22.772	22.1451	22.91
Q2FX08	Q2FX08	SAOUHSC_02099	Sensor protein VraS		adenyl nucleotide binding;adenyl ribonucleotide binding;ATP binding;binding;catalytic activity;kinase activity;molecular transducer activity;nucleotide binding;phosphotransferase activity, alcohol group as acceptor;phosphotransferase activity, nitrogenous group as acceptor;protein histidine kinase activity;protein kinase activity;purine nucleotide binding;purine ribonucleoside triphosphate bindin…	cell part;integral to membrane;intrinsic to membrane;membrane;membrane part;plasma membrane	Two-component system	40.044	12	42.9	1843800000	115	+	2.85587	1.37167	0.00322388	24.8247	24.794	25.1942	24.4262	22.9801	23.2787	23.721	23.7726
Q2FX09	Q2FX09	SAOUHSC_02098		biological regulation;biosynthetic process;cellular biosynthetic process;cellular macromolecule biosynthetic process;cellular macromolecule metabolic process;cellular metabolic process;cellular nitrogen compound metabolic process;cellular process;cellular response to stimulus;macromolecule biosynthetic process;macromolecule metabolic process;metabolic process;nitrogen compound metabolic process;n…	binding;DNA binding;nucleic acid binding;nucleic acid binding transcription factor activity;sequence-specific DNA binding transcription factor activity		Two-component system	23.545	20	91.4	21586000000	496	+	4.01218	1.22568	0.000653061	27.3221	27.1708	27.6668	27.0577	26.0691	26.0212	26.0978	26.1265
Q2FX10	Q2FX10	SAOUHSC_02097				cell part;integral to membrane;intrinsic to membrane;membrane;membrane part;plasma membrane		45.604	4	7.2	152660000	29		0.244775	0.236778	0.489828	21.4761	22.5793	21.3915	22.3271	21.0637	22.2071	21.5466	22.0095
Q2FX11	Q2FX11	SAOUHSC_02096						10.322	12	82.4	65588000000	402		0.397847	-0.0961142	0.326257	29.2981	29.2708	28.9367	29.4306	29.3663	29.2995	29.3125	29.3424
Q2FX12	Q2FX12	ptpA	Low molecular weight protein-tyrosine-phosphatase PtpA		catalytic activity;hydrolase activity;hydrolase activity, acting on ester bonds;phosphatase activity;phosphoprotein phosphatase activity;phosphoric ester hydrolase activity;protein tyrosine phosphatase activity			17.491	11	67.5	11478000000	129	+	1.3336	-0.202872	0.0381148	26.7466	26.8232	26.7822	26.7436	26.8923	26.8688	27.2097	26.9363
Q2FX13	Q2FX13	SAOUHSC_02093	UPF0435 protein SAOUHSC_02093					7.7886	5	51.5	7494400000	220	+	1.52602	-0.387761	0.0255684	26.3016	26.2063	26.1382	25.9629	26.7933	26.5686	26.5702	26.2278
Q2FX14	Q2FX14	SAOUHSC_02092			aminopeptidase activity;catalytic activity;exopeptidase activity;hydrolase activity;peptidase activity;peptidase activity, acting on L-amino acid peptides			47.117	28	63.9	28634000000	759	+	1.3733	0.125436	0.0350141	26.9637	27.0328	27.0486	27.0242	26.8057	26.8229	26.98	26.9589
Q2FX15	Q2FX15	SAOUHSC_02091						19.992	5	60.2	1249500000	79		0.160714	-0.0894752	0.618004	24.6718	24.8707	24.0439	24.7247	24.521	24.7682	24.9314	24.4482
Q2FX16	Q2FX16	SAOUHSC_02090			binding;catalytic activity;iron-sulfur cluster binding;metal cluster binding			43.987	10	25.2	3573000000	180	+	3.57711	-0.93365	0.000839161	24.6407	24.4639	24.3679	24.7739	25.3084	25.4522	25.7056	25.515
Q2FX19	Q2FX19	SAOUHSC_02087						35.632	18	65.1	15264000000	382		0.14972	0.0472455	0.639041	26.7498	26.9335	26.8387	26.8702	26.5236	26.8264	26.7728	27.0805
Q2FX20	Q2FX20	SAOUHSC_02086						7.3002	2	45.9	1011600000	36	+	5.49706	-2.9691	0	22.9232	22.6263	22.2131	22.4992	25.5728	25.4417	25.8045	25.3192
Q2FX21;Q2FY86	Q2FX21;Q2FY86	SAOUHSC_01578;SAOUHSC_02085						6.3913	4	94.5	1849400000	68	+	1.22732	-0.339873	0.0486589	25.1603	25.7193	25.2476	25.2643	25.8074	25.8093	25.5015	25.6328
Q2FX22	Q2FX22	SAOUHSC_02084			binding;DNA binding;nucleic acid binding;sequence-specific DNA binding			27.156	16	46	4666900000	169		0.509895	0.138875	0.253322	25.3473	24.9616	25.0775	24.9278	24.9549	24.7075	25.0234	25.0729
Q2FX25	Q2FX25	SAOUHSC_02080			binding;DNA binding;nucleic acid binding			30.173	7	48.7	125250000	14		0.408783	-0.451333	0.318361	22.0527	21.8024	22.7172	20.6638	21.6402	22.5311	22.6954	22.1746
Q2FX39	Q2FX39	SAOUHSC_02061						14.247	3	31.1	52165000	17	+	1.6028	-0.587093	0.02192	20.7734	20.7551	21.2003	21.3966	21.6754	21.2732	21.7576	21.7676
Q2FX56	Q2FX56	SAOUHSC_02043						36.77	11	43.5	1715000000	57		0.099126	-0.0560966	0.741091	25.2464	25.0702	25.5786	25.0864	25.1409	24.9047	25.6542	25.5062
Q2FX62	Q2FX62	SAOUHSC_02036						21.513	8	62.7	599860000	33		0.0145374	0.0123262	0.959978	24.17	23.8291	24.8036	23.7988	24.3009	23.8655	24.5278	23.8579
Q2FX68	Q2FX68	SAOUHSC_02029						73.649	6	17.9	912060000	34		0.397077	0.584041	0.326414	24.4195	22.8116	23.9914	24.3647	23.4773	24.0837	21.7796	23.9105
Q2FX69	Q2FX69	SAOUHSC_02028						66.986	3	13.5	1267400000	16		0.570145	-0.87535	0.220066	25.1193	22.6437	25.7667	25.0693	25.561	25.4704	25.0203	26.0486
Q2FX80	Q2FX80	SAOUHSC_02016						7.6787	7	80.3	2315200000	53		0.930407	0.27032	0.0965178	25.5931	25.3374	25.6316	25.3192	25.2445	25.4721	24.8762	25.2072
Q2FX85	Q2FX85	SAOUHSC_01992		carbohydrate transport;establishment of localization;organic substance transport;phosphoenolpyruvate-dependent sugar phosphotransferase system;transport	active transmembrane transporter activity;carbohydrate transmembrane transporter activity;catalytic activity;phosphotransferase activity, alcohol group as acceptor;protein-N(PI)-phosphohistidine-sugar phosphotransferase activity;substrate-specific transmembrane transporter activity;substrate-specific transporter activity;transferase activity;transferase activity, transferring phosphorus-containin…	cell part;membrane		37.309	2	8.8	174490000	11		0.304874	0.24896	0.419565	22.828	22.2231	22.6858	22.3682	22.5177	22.6682	21.3409	22.5826
Q2FX86	Q2FX86	SAOUHSC_01991			transporter activity	cell part;integral to membrane;intrinsic to membrane;membrane;membrane part;plasma membrane		53.122	22	41.2	4212500000	204		0.0502831	0.242336	0.861843	17.7502	23.1654	23.5616	18.6713	21.7907	19.5044	18.9319	21.9522
Q2FX87	Q2FX87	SAOUHSC_01990			active transmembrane transporter activity;adenyl nucleotide binding;adenyl ribonucleotide binding;amine transmembrane transporter activity;amine-transporting ATPase activity;amino acid transmembrane transporter activity;amino acid-transporting ATPase activity;ATP binding;ATPase activity;ATPase activity, coupled;ATPase activity, coupled to movement of substances;ATPase activity, coupled to transme…			26.768	17	66.9	9083500000	165		0.24054	0.65754	0.496082	26.5426	26.4046	25.0885	23.5781	22.6049	26.5101	24.1447	25.7239
Q2FX88	Q2FX88	queG	Epoxyqueuosine reductase	7-methylguanosine biosynthetic process;7-methylguanosine metabolic process;biosynthetic process;cellular biosynthetic process;cellular macromolecule metabolic process;cellular metabolic process;cellular nitrogen compound biosynthetic process;cellular nitrogen compound metabolic process;cellular process;guanosine biosynthetic process;guanosine metabolic process;heterocycle biosynthetic process;het…	4 iron, 4 sulfur cluster binding;binding;catalytic activity;cation binding;epoxyqueuosine reductase activity;ion binding;iron-sulfur cluster binding;metal cluster binding;metal ion binding;oxidoreductase activity	cell part;cytoplasm;intracellular part		42.432	8	26.1	801080000	44		0.112285	-0.219097	0.71267	23.8454	23.5924	25.2973	22.5005	24.9878	23.182	24.5449	23.3972
Q2FX89	Q2FX89	SAOUHSC_01988	Putative tRNA (cytidine(34)-2'-O)-methyltransferase	cellular macromolecule metabolic process;cellular metabolic process;cellular nitrogen compound metabolic process;cellular process;macromolecule metabolic process;metabolic process;nitrogen compound metabolic process;nucleic acid metabolic process;nucleobase-containing compound metabolic process;primary metabolic process;RNA metabolic process;RNA processing	binding;catalytic activity;methyltransferase activity;nucleic acid binding;RNA binding;RNA methyltransferase activity;S-adenosylmethionine-dependent methyltransferase activity;transferase activity;transferase activity, transferring one-carbon groups;tRNA methyltransferase activity	cell part;cytoplasm;intracellular part		18.11	7	73.1	9910600000	129		0.373071	-0.100914	0.34709	27.26	27.0826	27.3818	27.0379	27.1248	27.1706	27.3815	27.4889
Q2FX90	Q2FX90	SAOUHSC_01987						22.343	25	95	76795000000	737		0.915871	0.12809	0.0998374	28.8293	28.7216	28.8297	28.9008	28.6648	28.5405	28.7354	28.8282
Q2FX94	Q2FX94	fumC	Fumarate hydratase class II	acetyl-CoA catabolic process;acetyl-CoA metabolic process;carboxylic acid metabolic process;catabolic process;cellular catabolic process;cellular ketone metabolic process;cellular metabolic process;cellular process;coenzyme catabolic process;coenzyme metabolic process;cofactor catabolic process;cofactor metabolic process;dicarboxylic acid metabolic process;fumarate metabolic process;metabolic pro…	carbon-oxygen lyase activity;catalytic activity;fumarate hydratase activity;hydro-lyase activity;lyase activity	cell part;cytoplasmic part;intracellular part;macromolecular complex;protein complex;tricarboxylic acid cycle enzyme complex	Carbon fixation pathways in prokaryotes;Citrate cycle (TCA cycle);Pathways in cancer;Renal cell carcinoma	51.107	34	62.7	68852000000	851		0.919288	-0.133399	0.0992283	27.5562	27.7791	27.4943	27.6217	27.7441	27.7176	27.8589	27.6641
Q2FX95	Q2FX95	SAOUHSC_01982			binding;carbon-oxygen lyase activity;catalytic activity;hydro-lyase activity;intramolecular transferase activity;isomerase activity;lyase activity;nucleic acid binding;pseudouridine synthase activity;pseudouridylate synthase activity;RNA binding			31.44	15	61.5	12952000000	353	+	2.18902	0.159952	0.00772321	26.368	26.324	26.471	26.4362	26.2638	26.2029	26.2865	26.2061
Q2FX96	Q2FX96	SAOUHSC_01981			catalytic activity;kinase activity;molecular transducer activity;phosphotransferase activity, alcohol group as acceptor;phosphotransferase activity, nitrogenous group as acceptor;protein histidine kinase activity;protein kinase activity;signal transducer activity;transferase activity;transferase activity, transferring phosphorus-containing groups;two-component sensor activity	cell part;integral to membrane;intrinsic to membrane;membrane part		41.88	3	11.9	108010000	37		0.442859	0.461257	0.294019	22.6378	22.376	22.0454	21.1235	21.1658	22.479	21.6701	21.0228
Q2FX97	Q2FX97	SAOUHSC_01980		biological regulation;biosynthetic process;cellular biosynthetic process;cellular macromolecule biosynthetic process;cellular macromolecule metabolic process;cellular metabolic process;cellular nitrogen compound metabolic process;cellular process;cellular response to stimulus;macromolecule biosynthetic process;macromolecule metabolic process;metabolic process;nitrogen compound metabolic process;n…	binding;DNA binding;nucleic acid binding;nucleic acid binding transcription factor activity;sequence-specific DNA binding transcription factor activity			23.895	9	37.7	3345000000	64		0.794515	0.338089	0.133485	26.054	26.1633	26.6436	25.8392	25.9375	25.4973	25.8262	26.0867
Q2FX98	Q2FX98	SAOUHSC_01979			binding;DNA binding;nucleic acid binding;sequence-specific DNA binding			17.798	22	75.3	57582000000	741	+	3.6822	-0.6485	0.00096	28.337	28.4147	28.1203	28.4907	28.9466	28.9878	29.0184	29.0039
Q2FXA0	Q2FXA0	SAOUHSC_01977	UPF0342 protein SAOUHSC_01977					13.31	19	99.1	254710000000	781		0.131603	0.0489521	0.673445	30.9252	31.0237	31.1163	30.901	31.3083	30.9188	30.6901	30.8532
Q2FXA3	Q2FXA3	hemE	Uroporphyrinogen decarboxylase	biosynthetic process;cellular aromatic compound metabolic process;cellular biosynthetic process;cellular metabolic process;cellular nitrogen compound biosynthetic process;cellular nitrogen compound metabolic process;cellular process;cofactor biosynthetic process;cofactor metabolic process;heterocycle biosynthetic process;heterocycle metabolic process;metabolic process;nitrogen compound metabolic …	carbon-carbon lyase activity;carboxy-lyase activity;catalytic activity;lyase activity;uroporphyrinogen decarboxylase activity	cell part;cytoplasm;intracellular part	Porphyrin and chlorophyll metabolism	39.352	16	73.9	27001000000	375	+	2.51894	0.357461	0.00536364	26.9242	26.9167	26.7372	26.9809	26.4448	26.4376	26.6292	26.6176
Q2FXA4	Q2FXA4	hemH	Ferrochelatase	biosynthetic process;cellular biosynthetic process;cellular metabolic process;cellular nitrogen compound biosynthetic process;cellular nitrogen compound metabolic process;cellular process;cofactor biosynthetic process;cofactor metabolic process;heme biosynthetic process;heme metabolic process;heterocycle biosynthetic process;heterocycle metabolic process;metabolic process;nitrogen compound metabo…	binding;catalytic activity;cation binding;ferrochelatase activity;ion binding;lyase activity;metal ion binding	cell part;cytoplasm;intracellular part	Porphyrin and chlorophyll metabolism	35.07	13	55	9496600000	336	+	3.62788	0.612965	0.000895522	26.7327	26.7632	26.8346	26.8118	25.989	26.1113	26.3094	26.2808
Q2FXA5	Q2FXA5	SAOUHSC_01960		biosynthetic process;cellular biosynthetic process;cellular metabolic process;cellular nitrogen compound biosynthetic process;cellular nitrogen compound metabolic process;cellular process;cofactor biosynthetic process;cofactor metabolic process;heterocycle biosynthetic process;heterocycle metabolic process;metabolic process;nitrogen compound metabolic process;porphyrin-containing compound biosynt…	catalytic activity;oxidoreductase activity;oxidoreductase activity, acting on the CH-CH group of donors;oxidoreductase activity, acting on the CH-CH group of donors, oxygen as acceptor;oxygen-dependent protoporphyrinogen oxidase activity;protoporphyrinogen oxidase activity		Porphyrin and chlorophyll metabolism	51.983	34	75.8	38923000000	847	+	1.86085	0.254095	0.0137453	27.1942	27.1292	27.0127	27.3524	26.9771	26.9115	26.9031	26.8804
Q2FXA7	Q2FXA7	SAOUHSC_01958			catalytic activity;hydrolase activity			21.442	8	64.7	7468800000	184	+	1.28466	0.245586	0.0419734	26.4014	26.1707	26.1705	26.3295	25.9954	25.9557	26.2611	25.8775
Q2FXA8	Q2FXA8	SAOUHSC_01957						30.759	7	48.1	2239800000	54	+	1.37135	0.492518	0.0350713	24.7677	24.5032	25.1948	24.9668	24.0522	24.3831	24.3717	24.6554
Q2FXB7	Q2FXB7	SAOUHSC_01948			adenyl nucleotide binding;adenyl ribonucleotide binding;ATP binding;ATPase activity;binding;catalytic activity;hydrolase activity;hydrolase activity, acting on acid anhydrides;hydrolase activity, acting on acid anhydrides, in phosphorus-containing anhydrides;nucleoside-triphosphatase activity;nucleotide binding;purine nucleotide binding;purine ribonucleoside triphosphate binding;purine ribonucleo…		ABC transporters	25.891	5	19.1	408300000	47		0.9829	-0.784285	0.0870446	19.9678	20.0848	21.1859	21.1681	21.668	20.6779	21.5264	21.6715
Q2FXC3	Q2FXC3	splB	Serine protease SplB		catalytic activity;endopeptidase activity;hydrolase activity;peptidase activity;peptidase activity, acting on L-amino acid peptides;serine hydrolase activity;serine-type endopeptidase activity;serine-type peptidase activity	extracellular region		26.096	9	54.2	554120000	29	+	2.10956	-1.33335	0.00839485	21.8248	20.6185	21.3327	21.3986	22.7587	23.1	22.6498	21.9995
Q2FXC5;Q2FXC8	Q2FXC5	splD;splF	Serine protease SplD;Serine protease SplF		catalytic activity;endopeptidase activity;hydrolase activity;peptidase activity;peptidase activity, acting on L-amino acid peptides;serine hydrolase activity;serine-type endopeptidase activity;serine-type peptidase activity	extracellular region		25.678	7	54	706710000	19		0.0380886	0.180717	0.894388	18.6058	24.5991	24.5429	24.256	22.879	20.899	22.9886	24.5143
Q2FXD0	Q2FXD0	SAOUHSC_01933		cellular macromolecule metabolic process;cellular metabolic process;cellular nitrogen compound metabolic process;cellular process;clearance of foreign intracellular DNA;defense response;DNA metabolic process;DNA modification;DNA restriction-modification system;macromolecule metabolic process;macromolecule modification;metabolic process;nitrogen compound metabolic process;nucleic acid metabolic pr…	binding;catalytic activity;DNA binding;DNA-methyltransferase activity;methyltransferase activity;N-methyltransferase activity;nucleic acid binding;S-adenosylmethionine-dependent methyltransferase activity;site-specific DNA-methyltransferase (adenine-specific) activity;transferase activity;transferase activity, transferring one-carbon groups			66.903	31	50.1	21423000000	652	+	2.0003	-0.211955	0.0105587	26.6235	26.6996	26.689	26.5543	26.844	26.7729	26.9852	26.8121
Q2FXD1	Q2FXD1	SAOUHSC_01932		cellular macromolecule metabolic process;cellular metabolic process;cellular nitrogen compound metabolic process;cellular process;DNA metabolic process;DNA modification;macromolecule metabolic process;macromolecule modification;metabolic process;nitrogen compound metabolic process;nucleic acid metabolic process;nucleobase-containing compound metabolic process;primary metabolic process	binding;DNA binding;nucleic acid binding			46.441	8	27.6	2075300000	64		0.102387	0.0428786	0.734641	25.2375	25.0101	24.8088	25.4519	25.2722	25.0715	25.0182	24.975
Q2FXE1	Q2FXE1	SAOUHSC_01922						21.238	7	39.3	535100000	37	+	1.59653	1.52409	0.0219651	23.5684	23.9496	23.7045	22.4211	22.532	21.3829	21.0669	22.5653
Q2FXE2	Q2FXE2	SAOUHSC_01907			catalytic activity;oxidoreductase activity			31.471	24	94.2	40720000000	470	+	3.83424	1.00321	0.000566372	28.6311	28.4366	28.6925	28.3962	27.6711	27.3023	27.7015	27.4687
Q2FXE7	Q2FXE7	SAOUHSC_01902						11.541	1	10	79394000	7		1.14812	0.749907	0.0573023	20.994	22.4339	22.061	21.3252	21.1802	20.9795	20.916	20.7388
Q2FXE8	Q2FXE8	SAOUHSC_01901	Transaldolase	alcohol catabolic process;alcohol metabolic process;carbohydrate catabolic process;carbohydrate metabolic process;catabolic process;cellular carbohydrate catabolic process;cellular carbohydrate metabolic process;cellular metabolic process;cellular nitrogen compound metabolic process;cellular process;coenzyme metabolic process;cofactor metabolic process;glucose catabolic process;glucose metabolic …	catalytic activity;sedoheptulose-7-phosphate:D-glyceraldehyde-3-phosphate glyceronetransferase activity;transferase activity;transferase activity, transferring aldehyde or ketonic groups	cell part;cytoplasm;intracellular part	Pentose phosphate pathway	25.705	39	99.6	175700000000	1165	+	5.01239	0.708736	0	29.9351	29.904	30.0612	29.9394	29.2457	29.1722	29.3575	29.2293
Q2FXF0	Q2FXF0	SAOUHSC_01899						16.805	4	26.5	748850000	49		0.975671	0.407987	0.08796	24.4146	24.357	24.9466	24.2698	24.2636	24.0876	23.6662	24.3386
Q2FXF3	Q2FXF3	SAOUHSC_01896						8.973	3	40.5	1362600000	49		0.426105	-0.146525	0.305829	24.965	25.1594	24.6576	25.0031	24.8867	25.0801	25.4042	25.0002
Q2FXF4	Q2FXF4	SAOUHSC_01895			amidase activity;catalytic activity;hydrolase activity;hydrolase activity, acting on carbon-nitrogen (but not peptide) bonds;hydrolase activity, acting on carbon-nitrogen (but not peptide) bonds, in linear amides			32.506	21	66.9	3596200000	190		0.0296678	-0.00355625	0.916611	24.7003	24.6055	24.7295	24.7156	24.6593	24.6701	24.6546	24.7812
Q2FXF5	Q2FXF5	arsC	Protein ArsC	response to arsenic-containing substance;response to chemical stimulus;response to inorganic substance;response to stimulus	arsenate reductase (thioredoxin) activity;arsenate reductase activity;catalytic activity;hydrolase activity;hydrolase activity, acting on ester bonds;oxidoreductase activity;phosphatase activity;phosphoprotein phosphatase activity;phosphoric ester hydrolase activity;protein tyrosine phosphatase activity			14.686	7	67.2	1219300000	57		0.723829	0.157608	0.156411	24.2755	24.239	24.191	24.2669	24.171	23.7946	24.284	24.0923
Q2FXF8	Q2FXF8	SAOUHSC_01890						57.577	13	50.2	1421300000	94		0.320974	-0.288398	0.401854	23.0758	22.6955	23.3656	22.6323	24.0161	23.2994	22.3564	23.2509
Q2FXF9	Q2FXF9	SAOUHSC_01889	Riboflavin biosynthesis protein RibD	biosynthetic process;cellular biosynthetic process;cellular metabolic process;cellular nitrogen compound biosynthetic process;cellular nitrogen compound metabolic process;cellular process;flavin-containing compound biosynthetic process;flavin-containing compound metabolic process;heterocycle biosynthetic process;heterocycle metabolic process;metabolic process;nitrogen compound metabolic process;r…	5-amino-6-(5-phosphoribosylamino)uracil reductase activity;binding;catalytic activity;cation binding;coenzyme binding;cofactor binding;deaminase activity;diaminohydroxyphosphoribosylaminopyrimidine deaminase activity;hydrolase activity;hydrolase activity, acting on carbon-nitrogen (but not peptide) bonds;hydrolase activity, acting on carbon-nitrogen (but not peptide) bonds, in cyclic amidines;ion…		Riboflavin metabolism	37.439	2	5.4	265910000	10	+	1.59665	-0.567211	0.022	22.2982	22.2601	23.0186	22.7702	23.0957	23.2161	23.2605	23.0436
Q2FXG1	Q2FXG1	ribBA	Riboflavin biosynthesis protein RibBA	biosynthetic process;cellular biosynthetic process;cellular metabolic process;cellular nitrogen compound biosynthetic process;cellular nitrogen compound metabolic process;cellular process;flavin-containing compound biosynthetic process;flavin-containing compound metabolic process;heterocycle biosynthetic process;heterocycle metabolic process;metabolic process;nitrogen compound metabolic process;r…	3,4-dihydroxy-2-butanone-4-phosphate synthase activity;binding;carbon-carbon lyase activity;catalytic activity;cation binding;cyclohydrolase activity;GTP binding;GTP cyclohydrolase activity;GTP cyclohydrolase II activity;guanyl nucleotide binding;guanyl ribonucleotide binding;hydrolase activity;hydrolase activity, acting on carbon-nitrogen (but not peptide) bonds;hydrolase activity, acting on car…		Riboflavin metabolism	44.188	8	18.8	151500000	24	+	2.47382	-1.66747	0.00583607	20.2332	21.8353	20.8513	21.3246	22.6086	22.5838	23.0154	22.7065
Q2FXG2	Q2FXG2	ribH	6,7-dimethyl-8-ribityllumazine synthase	biosynthetic process;cellular biosynthetic process;cellular metabolic process;cellular nitrogen compound biosynthetic process;cellular nitrogen compound metabolic process;cellular process;flavin-containing compound biosynthetic process;flavin-containing compound metabolic process;heterocycle biosynthetic process;heterocycle metabolic process;metabolic process;nitrogen compound metabolic process;r…	6,7-dimethyl-8-ribityllumazine synthase activity;catalytic activity;intramolecular transferase activity;intramolecular transferase activity, transferring acyl groups;isomerase activity;transferase activity	cell part;macromolecular complex;protein complex;riboflavin synthase complex	Riboflavin metabolism	16.396	15	87.7	10888000000	324	+	5.74004	-1.12228	0	25.6552	25.6156	25.4748	25.5277	26.6846	26.5638	26.7784	26.7356
Q2FXG3	Q2FXG3	SAOUHSC_01884		amine catabolic process;amine metabolic process;carboxylic acid catabolic process;carboxylic acid metabolic process;catabolic process;cellular amine metabolic process;cellular amino acid catabolic process;cellular amino acid metabolic process;cellular catabolic process;cellular ketone metabolic process;cellular metabolic process;cellular nitrogen compound metabolic process;cellular process;glutam…	catalytic activity;oxidoreductase activity;oxidoreductase activity, acting on the CH-NH group of donors;proline dehydrogenase activity		Arginine and proline metabolism	38.029	22	75.7	35091000000	432	+	2.57718	0.64079	0.00476471	27.6477	27.9181	27.4375	27.6661	26.9255	26.9139	27.2774	26.9896
Q2FXG5	Q2FXG5	SAOUHSC_01882						31.865	18	58.5	11881000000	295	+	3.02396	0.564736	0.00218803	26.0138	25.9912	25.9977	25.9788	25.3525	25.3271	25.3323	25.7106
Q2FXH0	Q2FXH0	SAOUHSC_01877			binding;catalytic activity;iron-sulfur cluster binding;metal cluster binding			36.053	6	27.1	780010000	32		0.741583	-0.266216	0.14951	23.7916	23.4483	23.9522	23.6573	24.3654	23.7597	23.7855	24.0038
Q2FXH2	Q2FXH2	leuS	Leucine--tRNA ligase	amine metabolic process;amino acid activation;carboxylic acid metabolic process;cellular amine metabolic process;cellular amino acid metabolic process;cellular ketone metabolic process;cellular macromolecule metabolic process;cellular metabolic process;cellular nitrogen compound metabolic process;cellular process;leucyl-tRNA aminoacylation;macromolecule metabolic process;metabolic process;ncRNA m…	adenyl nucleotide binding;adenyl ribonucleotide binding;aminoacyl-tRNA editing activity;aminoacyl-tRNA ligase activity;ATP binding;binding;carboxylic ester hydrolase activity;catalytic activity;hydrolase activity;hydrolase activity, acting on ester bonds;leucine-tRNA ligase activity;ligase activity;ligase activity, forming aminoacyl-tRNA and related compounds;ligase activity, forming carbon-oxyge…	cell part;cytoplasm;intracellular part	Aminoacyl-tRNA biosynthesis;Valine, leucine and isoleucine biosynthesis	91.785	48	56.5	58461000000	1440		0.00310376	-0.00102901	0.991766	28.2964	28.2519	28.3986	28.4341	28.331	28.3384	28.1084	28.6073
Q2FXH3	Q2FXH3	SAOUHSC_01874						11.344	10	100	3421700000	137		0.487262	-0.124027	0.265723	25.2548	25.0071	25.2475	25.172	25.2697	25.4883	25.0242	25.3953
Q2FXH5	Q2FXH5	SAOUHSC_01872		metabolic process;oxidation-reduction process				46.415	6	17.8	1404100000	81		0.247244	-0.0792646	0.487599	24.1323	24.1457	23.8816	24.0092	24.447	24.0013	23.9261	24.1116
Q2FXH6	Q2FXH6	SAOUHSC_01871		biosynthetic process;carbohydrate biosynthetic process;carbohydrate metabolic process;macromolecule biosynthetic process;macromolecule metabolic process;metabolic process;polysaccharide biosynthetic process;polysaccharide metabolic process;primary metabolic process		cell part;membrane		61.945	3	10.5	402880000	47		0.20044	-0.338036	0.55443	23.0272	22.4894	22.859	23.2874	23.1789	24.7204	21.5894	23.5266
Q2FXH7	Q2FXH7	SAOUHSC_01870	Pseudouridine synthase	cellular macromolecule metabolic process;cellular metabolic process;cellular nitrogen compound metabolic process;cellular process;macromolecule metabolic process;macromolecule modification;metabolic process;nitrogen compound metabolic process;nucleic acid metabolic process;nucleobase-containing compound metabolic process;primary metabolic process;pseudouridine synthesis;RNA metabolic process;RNA …	binding;catalytic activity;intramolecular transferase activity;isomerase activity;lyase activity;nucleic acid binding;pseudouridine synthase activity;RNA binding			26.615	4	16.9	234230000	22		0.44924	0.456188	0.289282	22.2783	23.4604	22.431	23.1817	22.4817	22.9312	21.3553	22.7584
Q2FXH8	Q2FXH8	SAOUHSC_01869						15.733	20	92.9	10024000000	379	+	1.60643	-0.345248	0.0214744	25.4704	25.5019	25.4159	25.5584	26.1172	25.9043	25.6436	25.6626
Q2FXH9	Q2FXH9	SAOUHSC_01868	Putative dipeptidase SAOUHSC_01868		binding;catalytic activity;cation binding;dipeptidase activity;exopeptidase activity;hydrolase activity;ion binding;metal ion binding;metallopeptidase activity;peptidase activity;peptidase activity, acting on L-amino acid peptides;transition metal ion binding;zinc ion binding		Lysine biosynthesis	52.824	41	68.4	86746000000	1361	+	3.42251	0.305834	0.00134132	27.8424	27.7303	27.8544	27.8437	27.5166	27.443	27.4945	27.5933
Q2FXI0	Q2FXI0	SAOUHSC_01867	D-alanine aminotransferase	amine metabolic process;carboxylic acid metabolic process;cellular amine metabolic process;cellular amino acid metabolic process;cellular ketone metabolic process;cellular metabolic process;cellular nitrogen compound metabolic process;cellular process;D-amino acid metabolic process;metabolic process;nitrogen compound metabolic process;organic acid metabolic process;oxoacid metabolic process;prima…	binding;catalytic activity;cofactor binding;D-alanine:2-oxoglutarate aminotransferase activity;pyridoxal phosphate binding;transaminase activity;transferase activity;transferase activity, transferring nitrogenous groups;vitamin B6 binding;vitamin binding		Arginine and proline metabolism;D-Alanine metabolism;D-Arginine and D-ornithine metabolism;Lysine degradation;Phenylalanine metabolism	31.893	36	97.2	77713000000	1238	+	3.6092	0.448472	0.000875912	27.7568	27.794	27.7205	27.7373	27.1382	27.3469	27.383	27.3466
Q2FXI1	Q2FXI1	SAOUHSC_01866			catalytic activity;transferase activity;transferase activity, transferring phosphorus-containing groups			28.388	8	33.6	356710000	17		1.08013	1.00765	0.0662857	22.4339	23.0739	22.4742	23.1705	20.556	21.7629	22.6289	22.174
Q2FXI2	Q2FXI2	trmB	tRNA (guanine-N(7)-)-methyltransferase		catalytic activity;methyltransferase activity;RNA methyltransferase activity;S-adenosylmethionine-dependent methyltransferase activity;transferase activity;transferase activity, transferring one-carbon groups;tRNA (guanine) methyltransferase activity;tRNA (guanine-N7-)-methyltransferase activity;tRNA methyltransferase activity			25.275	10	58.9	2398800000	128		0.527295	-0.207606	0.244336	23.8746	24.2487	24.5214	23.9835	24.2582	24.3551	24.1702	24.675
Q2FXI3	Q2FXI3	SAOUHSC_01864						32.189	5	27.5	312820000	41		1.06821	0.704977	0.068238	21.5177	22.8137	22.8038	22.5911	21.5577	21.3943	21.9906	21.9638
Q2FXI4	Q2FXI4	SAOUHSC_01863						11.967	6	68.9	1185100000	58	+	1.27227	1.02941	0.0431229	23.3608	23.7227	23.7989	24.1721	21.895	23.3083	22.2303	23.5031
Q2FXI5	Q2FXI5	SAOUHSC_01861						39.783	22	78.8	33093000000	622		0.599062	0.0632162	0.204717	27.9942	27.9999	28.0534	28.1571	27.9882	27.9237	28.0771	27.9626
Q2FXI6	Q2FXI6	SAOUHSC_01860		biological regulation;cell redox homeostasis;cellular homeostasis;cellular process;glycerol ether metabolic process;homeostatic process;metabolic process;organic ether metabolic process;regulation of biological process;regulation of biological quality;regulation of cellular process;small molecule metabolic process	catalytic activity;disulfide oxidoreductase activity;oxidoreductase activity;oxidoreductase activity, acting on a sulfur group of donors;protein disulfide oxidoreductase activity			11.855	9	64.1	12436000000	154		0.351496	-0.0538588	0.367073	27.6693	27.6046	27.7837	27.6925	27.8666	27.6605	27.7981	27.6402
Q2FXI7	Q2FXI7	SAOUHSC_01859	UPF0354 protein SAOUHSC_01859					33.069	15	51.6	9811000000	293		0.948444	0.139545	0.0935011	26.4259	26.2344	26.5136	26.3944	26.281	26.2384	26.1318	26.359
Q2FXI8	Q2FXI8	SAOUHSC_01858			binding;nucleic acid binding;RNA binding;tRNA binding			21.69	24	79.8	23375000000	393		0.109986	-0.0182428	0.717784	27.4087	27.4224	27.5759	27.6149	27.452	27.5664	27.4904	27.5861
Q2FXI9	Q2FXI9	SAOUHSC_01857		cell cycle;cell division;cellular process;chromosome segregation	adenyl nucleotide binding;adenyl ribonucleotide binding;ATP binding;binding;DNA binding;nucleic acid binding;nucleotide binding;purine nucleotide binding;purine ribonucleoside triphosphate binding;purine ribonucleotide binding;ribonucleotide binding	cell part;integral to membrane;intrinsic to membrane;membrane part		144.65	48	43	17597000000	789		0.00851776	-0.00313234	0.976982	26.4469	26.539	26.4571	26.4278	26.5289	26.6816	26.1223	26.5505
Q2FXJ0	Q2FXJ0	murC	UDP-N-acetylmuramate--L-alanine ligase	amine metabolic process;aminoglycan biosynthetic process;aminoglycan metabolic process;biological regulation;biosynthetic process;carbohydrate biosynthetic process;carbohydrate metabolic process;cell cycle;cell division;cell wall macromolecule biosynthetic process;cell wall macromolecule metabolic process;cell wall organization;cell wall organization or biogenesis;cellular biosynthetic process;ce…	acid-amino acid ligase activity;adenyl nucleotide binding;adenyl ribonucleotide binding;ATP binding;binding;catalytic activity;ligase activity;ligase activity, forming carbon-nitrogen bonds;nucleotide binding;purine nucleotide binding;purine ribonucleoside triphosphate binding;purine ribonucleotide binding;ribonucleotide binding;UDP-N-acetylmuramate-L-alanine ligase activity	cell part;cytoplasm;intracellular part	D-Glutamine and D-glutamate metabolism;Peptidoglycan biosynthesis	49.188	25	59.7	20536000000	528		0.934584	0.149075	0.0955758	26.5504	26.5785	26.7116	26.6084	26.321	26.5371	26.3623	26.6321
Q2FXJ2	Q2FXJ2	isdH	Iron-regulated surface determinant protein H			cell part;cell wall;external encapsulating structure;extracellular region;membrane		100.95	5	7.9	4939600000	85		0.933731	0.307049	0.0956541	26.2379	26.211	26.7269	26.3006	26.1168	26.0247	25.7729	26.3337
Q2FXJ4	Q2FXJ4	SAOUHSC_01840		amine metabolic process;aminoglycan biosynthetic process;aminoglycan metabolic process;biological regulation;biosynthetic process;carbohydrate biosynthetic process;carbohydrate metabolic process;cell wall macromolecule biosynthetic process;cell wall macromolecule metabolic process;cell wall organization;cell wall organization or biogenesis;cellular biosynthetic process;cellular cell wall macromol…	catalytic activity;transferase activity	cell part;integral to membrane;intrinsic to membrane;membrane part	Peptidoglycan biosynthesis	34.526	5	32.9	2611600000	21		0.4082	0.158553	0.31874	25.4189	25.7575	25.6252	25.8463	25.4657	25.8668	25.5175	25.1638
Q2FXJ5	Q2FXJ5	tyrS	Tyrosine--tRNA ligase	amine metabolic process;amino acid activation;carboxylic acid metabolic process;cellular amine metabolic process;cellular amino acid metabolic process;cellular ketone metabolic process;cellular macromolecule metabolic process;cellular metabolic process;cellular nitrogen compound metabolic process;cellular process;macromolecule metabolic process;metabolic process;ncRNA metabolic process;nitrogen c…	adenyl nucleotide binding;adenyl ribonucleotide binding;aminoacyl-tRNA ligase activity;ATP binding;binding;catalytic activity;ligase activity;ligase activity, forming aminoacyl-tRNA and related compounds;ligase activity, forming carbon-oxygen bonds;nucleic acid binding;nucleotide binding;purine nucleotide binding;purine ribonucleoside triphosphate binding;purine ribonucleotide binding;ribonucleot…	cell part;cytoplasm;intracellular part	Aminoacyl-tRNA biosynthesis	47.597	42	73.6	38843000000	930		0.40532	-0.132345	0.320099	27.3651	27.3664	27.4532	27.6715	27.5561	27.5405	27.3472	27.9417
Q2FXJ6	Q2FXJ6	SAOUHSC_01838			catalytic activity;endopeptidase activity;hydrolase activity;peptidase activity;peptidase activity, acting on L-amino acid peptides;serine hydrolase activity;serine-type endopeptidase activity;serine-type peptidase activity			45.802	40	84.9	90240000000	1033	+	4.92927	1.7343	0	29.7487	29.5805	29.9751	29.4332	27.8846	28.0499	27.8098	28.0561
Q2FXJ7	Q2FXJ7	SAOUHSC_01837			1-acylglycerol-3-phosphate O-acyltransferase activity;acylglycerol O-acyltransferase activity;catalytic activity;O-acyltransferase activity;transferase activity;transferase activity, transferring acyl groups;transferase activity, transferring acyl groups other than amino-acyl groups		Glycerolipid metabolism;Glycerophospholipid metabolism	23.074	15	60.5	12581000000	336		0.446662	0.110966	0.291285	26.0041	25.7808	25.8677	26.0617	25.7552	25.8869	25.6007	26.0276
Q2FXJ8	Q2FXJ8	SAOUHSC_01836		carbohydrate transport;establishment of localization;organic substance transport;phosphoenolpyruvate-dependent sugar phosphotransferase system;transport	active transmembrane transporter activity;carbohydrate transmembrane transporter activity;catalytic activity;hexose transmembrane transporter activity;kinase activity;monosaccharide transmembrane transporter activity;N-acetylglucosamine transmembrane transporter activity;phosphotransferase activity, alcohol group as acceptor;protein-N(PI)-phosphohistidine-sugar phosphotransferase activity;substra…	cell part;integral to membrane;intracellular part;intrinsic to membrane;membrane;membrane part;organelle inner membrane;organelle membrane;organelle part;plasma membrane	Amino sugar and nucleotide sugar metabolism;Phosphotransferase system (PTS)	53.114	9	25.6	1896900000	60	+	1.49448	-0.424	0.0270296	23.9651	24.3636	24.0426	24.0002	24.6653	24.74	24.4684	24.1938
Q2FXK1	Q2FXK1	SAOUHSC_01833		amine biosynthetic process;amine metabolic process;biosynthetic process;carboxylic acid biosynthetic process;carboxylic acid metabolic process;cellular amine metabolic process;cellular amino acid biosynthetic process;cellular amino acid metabolic process;cellular biosynthetic process;cellular ketone metabolic process;cellular metabolic process;cellular nitrogen compound biosynthetic process;cellu…	amine binding;amino acid binding;binding;carboxylic acid binding;catalytic activity;coenzyme binding;cofactor binding;NAD binding;nucleotide binding;oxidoreductase activity;oxidoreductase activity, acting on CH-OH group of donors;oxidoreductase activity, acting on the CH-OH group of donors, NAD or NADP as acceptor;phosphoglycerate dehydrogenase activity		Glycine, serine and threonine metabolism;Methane metabolism	57.618	14	32.4	1092900000	134		0.47042	0.188622	0.275954	22.9622	22.8823	23.028	23.0553	22.3553	22.9127	23.1977	22.7075
Q2FXK2	Q2FXK2	SAOUHSC_01832			binding;catalytic activity;cofactor binding;pyridoxal phosphate binding;vitamin B6 binding;vitamin binding			42.85	7	23.1	5716500000	30		0.718207	0.495227	0.158396	26.9251	26.1579	26.3182	26.6528	25.673	25.5835	25.9658	26.8508
Q2FXK3	Q2FXK3	SAOUHSC_01831		response to chemical stimulus;response to oxidative stress;response to stimulus;response to stress				16.07	5	35.8	1410600000	83	+	1.87973	0.958735	0.0133083	24.1605	23.7119	24.0493	24.1009	22.6155	22.6467	23.6853	23.2401
Q2FXK4	Q2FXK4	SAOUHSC_01830		alcohol metabolic process;alditol metabolic process;carbohydrate metabolic process;cellular carbohydrate metabolic process;cellular metabolic process;cellular process;glycerol metabolic process;lipid metabolic process;metabolic process;polyol metabolic process;primary metabolic process;small molecule metabolic process	catalytic activity;glycerophosphodiester phosphodiesterase activity;hydrolase activity;hydrolase activity, acting on ester bonds;phosphoric diester hydrolase activity;phosphoric ester hydrolase activity		Glycerophospholipid metabolism	28.405	5	20.6	570480000	34	+	1.62641	1.13382	0.0197544	22.4803	22.0675	22.4729	22.3347	20.1466	21.7861	21.3515	21.5358
Q2FXK6	Q2FXK6	rpsD	30S ribosomal protein S4	biosynthetic process;cellular biosynthetic process;cellular macromolecule biosynthetic process;cellular macromolecule metabolic process;cellular metabolic process;cellular process;cellular protein metabolic process;macromolecule biosynthetic process;macromolecule metabolic process;metabolic process;primary metabolic process;protein metabolic process;translation	binding;nucleic acid binding;RNA binding;rRNA binding;structural constituent of ribosome;structural molecule activity	cell part;intracellular organelle part;intracellular part;macromolecular complex;organelle part;ribonucleoprotein complex;small ribosomal subunit	Ribosome	23.013	40	97	282110000000	1550	+	2.2237	-0.344744	0.00752184	30.7569	30.6871	30.6284	30.8321	31.0788	31.1558	30.8699	31.179
Q2FXK7	Q2FXK7	SAOUHSC_01828						17.11	2	8.4	5188900000	68		0.411039	-0.0969844	0.315932	26.7149	26.4974	26.6075	26.5103	26.6987	26.479	26.9165	26.6239
Q2FXK8	Q2FXK8	ezrA	Septation ring formation regulator EzrA	barrier septum formation;cellular component assembly;cellular component assembly at cellular level;cellular component organization;cellular component organization at cellular level;cellular component organization or biogenesis;cellular component organization or biogenesis at cellular level;cellular macromolecular complex assembly;cellular macromolecular complex subunit organization;cellular proce…		cell cortex part;cell part;cytoplasmic part;cytoskeletal part;cytoskeleton;integral to membrane;intracellular non-membrane-bounded organelle;intracellular organelle;intracellular organelle part;intracellular part;intrinsic to membrane;membrane;membrane part;non-membrane-bounded organelle;organelle;organelle part;plasma membrane;septin cytoskeleton;septin ring		66.246	54	76.6	64984000000	1253	+	3.6414	-0.36093	0.000923077	27.6162	27.5658	27.6477	27.5784	27.9711	27.848	27.9824	28.0504
Q2FXL0	Q2FXL0	SAOUHSC_01825			binding;catalytic activity;cofactor binding;pyridoxal phosphate binding;vitamin B6 binding;vitamin binding		Sulfur relay system;Thiamine metabolism	42.365	8	31.7	425180000	32		0.842909	0.247595	0.120236	23.4029	23.3983	23.389	22.9892	23.2252	22.7837	22.9665	23.2138
Q2FXL1	Q2FXL1	thiI	Probable tRNA sulfurtransferase	aromatic compound biosynthetic process;biosynthetic process;cellular aromatic compound metabolic process;cellular biosynthetic process;cellular macromolecule metabolic process;cellular metabolic process;cellular nitrogen compound biosynthetic process;cellular nitrogen compound metabolic process;cellular process;coenzyme biosynthetic process;coenzyme metabolic process;cofactor biosynthetic process…	adenyl nucleotide binding;adenyl ribonucleotide binding;adenylyltransferase activity;ATP binding;binding;catalytic activity;nucleic acid binding;nucleotide binding;nucleotidyltransferase activity;purine nucleotide binding;purine ribonucleoside triphosphate binding;purine ribonucleotide binding;ribonucleotide binding;RNA binding;sulfurtransferase activity;transferase activity;transferase activity,…	cell part;cytoplasm;intracellular part	Sulfur relay system;Thiamine metabolism	46.209	24	68.8	5234300000	316		0.307231	-0.0819764	0.417125	25.1337	25.1473	25.1818	25.1676	25.0748	25.1848	25.1306	25.5681
Q2FXL3	Q2FXL3	tpx	Probable thiol peroxidase	biological regulation;cell redox homeostasis;cellular homeostasis;cellular process;homeostatic process;regulation of biological process;regulation of biological quality;regulation of cellular process	antioxidant activity;catalytic activity;oxidoreductase activity;oxidoreductase activity, acting on paired donors, with incorporation or reduction of molecular oxygen;oxidoreductase activity, acting on peroxide as acceptor;peroxidase activity;peroxiredoxin activity;thioredoxin peroxidase activity			18.005	24	100	78630000000	658	+	4.3137	0.760141	0	28.9874	28.8199	29.0138	28.9568	28.2877	28.0734	28.2878	28.0885
Q2FXL4	Q2FXL4	SAOUHSC_01821		biological regulation;cellular macromolecule metabolic process;cellular metabolic process;cellular nitrogen compound metabolic process;cellular process;DNA alkylation;DNA metabolic process;DNA methylation;DNA modification;macromolecule metabolic process;macromolecule methylation;macromolecule modification;metabolic process;methylation;nitrogen compound metabolic process;nucleic acid metabolic pro…	binding;catalytic activity;DNA binding;methyltransferase activity;N-methyltransferase activity;nucleic acid binding;transferase activity;transferase activity, transferring one-carbon groups			35.947	22	55.6	10928000000	334		0.266638	-0.0441704	0.462889	26.0177	25.8654	25.9903	26.0557	26.0162	25.8856	26.0571	26.1471
Q2FXL5	Q2FXL5	ackA	Acetate kinase	acetyl-CoA biosynthetic process;acetyl-CoA metabolic process;biosynthetic process;cellular biosynthetic process;cellular metabolic process;cellular process;coenzyme biosynthetic process;coenzyme metabolic process;cofactor biosynthetic process;cofactor metabolic process;metabolic process;organic acid metabolic process;small molecule metabolic process	acetate kinase activity;adenyl nucleotide binding;adenyl ribonucleotide binding;ATP binding;binding;catalytic activity;cation binding;ion binding;kinase activity;magnesium ion binding;metal ion binding;nucleotide binding;phosphotransferase activity, carboxyl group as acceptor;purine nucleotide binding;purine ribonucleoside triphosphate binding;purine ribonucleotide binding;ribonucleotide binding;…	cell part;cytoplasm;intracellular part	Carbon fixation pathways in prokaryotes;Methane metabolism;Propanoate metabolism;Pyruvate metabolism;Taurine and hypotaurine metabolism	44.042	65	99.8	269050000000	2458		0.0411257	0.0122695	0.887648	29.4488	29.585	29.5752	29.8502	29.4978	29.6109	29.5327	29.7687
Q2FXL6	Q2FXL6	SAOUHSC_01819	Putative universal stress protein SAOUHSC_01819	response to stimulus;response to stress		cell part;cytoplasm;intracellular part		18.475	34	100	595720000000	2322		0.895603	-0.234475	0.105216	31.218	31.0902	30.8431	31.1679	31.3144	31.2581	31.5902	31.0943
Q2FXL7	Q2FXL7	ald2	Alanine dehydrogenase 2	alanine catabolic process;alanine metabolic process;amine catabolic process;amine metabolic process;carboxylic acid catabolic process;carboxylic acid metabolic process;catabolic process;cellular amine metabolic process;cellular amino acid catabolic process;cellular amino acid metabolic process;cellular catabolic process;cellular ketone metabolic process;cellular metabolic process;cellular nitroge…	alanine dehydrogenase activity;catalytic activity;oxidoreductase activity;oxidoreductase activity, acting on the CH-NH2 group of donors		Alanine, aspartate and glutamate metabolism;Taurine and hypotaurine metabolism	40.105	45	77.2	54211000000	958		1.06822	0.187623	0.0683178	26.8852	27.0452	26.9297	27.069	26.8291	26.7091	26.638	27.0024
Q2FXL9	Q2FXL9	SAOUHSC_01816	Uncharacterized peptidase SAOUHSC_01816		binding;catalytic activity;cation binding;hydrolase activity;ion binding;metal ion binding			39.553	23	60.1	28965000000	658	+	4.04758	0.572992	0.000680851	27.2381	27.1527	27.2334	27.1215	26.4979	26.6384	26.5648	26.7526
Q2FXM0	Q2FXM0	SAOUHSC_01815	UPF0173 metal-dependent hydrolase SAOUHSC_01815		catalytic activity;hydrolase activity			25.25	13	72.5	74301000000	533	+	4.10879	0.506802	0.000727273	30.0889	30.0362	30.0707	29.9754	29.4202	29.5075	29.576	29.6403
Q2FXM1	Q2FXM1	SAOUHSC_01814		response to stimulus;response to stress				15.226	28	94.2	182110000000	1238		0.717767	0.0716567	0.158359	28.582	28.659	28.6298	28.674	28.4532	28.5504	28.6664	28.5882
Q2FXM2	Q2FXM2	SAOUHSC_01813						48.53	17	41.2	3967900000	132	+	1.49517	0.438303	0.0270696	25.2453	25.578	25.2753	25.5499	24.6364	24.9827	25.2745	25.0017
Q2FXM3	Q2FXM3	SAOUHSC_01812			binding;nucleic acid binding			35.096	15	54.6	16598000000	332		0.850719	0.176216	0.117806	27.7452	27.6	27.9464	27.7346	27.6686	27.3551	27.6673	27.6303
Q2FXM5	Q2FXM5	SAOUHSC_01810		carboxylic acid metabolic process;cellular ketone metabolic process;cellular metabolic process;cellular process;dicarboxylic acid metabolic process;malate metabolic process;metabolic process;organic acid metabolic process;oxoacid metabolic process;small molecule metabolic process	binding;catalytic activity;cation binding;coenzyme binding;cofactor binding;ion binding;malate dehydrogenase (decarboxylating) activity;malate dehydrogenase activity;malic enzyme activity;metal ion binding;NAD binding;nucleotide binding;oxidoreductase activity;oxidoreductase activity, acting on CH-OH group of donors;oxidoreductase activity, acting on the CH-OH group of donors, NAD or NADP as acce…		Pyruvate metabolism;Two-component system	44.233	43	81.2	109570000000	1185	+	2.3309	-0.227252	0.00697512	27.9406	27.996	27.9696	28.125	28.29	28.2076	28.157	28.2857
Q2FXM6	Q2FXM6	accD	Acetyl-coenzyme A carboxylase carboxyl transferase subunit beta	biosynthetic process;carboxylic acid biosynthetic process;carboxylic acid metabolic process;cellular biosynthetic process;cellular ketone metabolic process;cellular lipid metabolic process;cellular metabolic process;cellular process;fatty acid biosynthetic process;fatty acid metabolic process;lipid biosynthetic process;lipid metabolic process;metabolic process;monocarboxylic acid metabolic proces…	acetyl-CoA carboxylase activity;adenyl nucleotide binding;adenyl ribonucleotide binding;ATP binding;binding;catalytic activity;cation binding;CoA carboxylase activity;ion binding;ligase activity;ligase activity, forming carbon-carbon bonds;metal ion binding;nucleotide binding;purine nucleotide binding;purine ribonucleoside triphosphate binding;purine ribonucleotide binding;ribonucleotide binding;…	acetyl-CoA carboxylase complex;cell part;cytoplasmic part;intracellular part;macromolecular complex;protein complex	Carbon fixation pathways in prokaryotes;Fatty acid biosynthesis;Propanoate metabolism;Pyruvate metabolism;Tetracycline biosynthesis	31.871	23	84.6	15146000000	388	+	2.69258	-0.221676	0.00375484	26.0926	26.0174	26.0244	26.1118	26.2151	26.254	26.2829	26.381
Q2FXM7	Q2FXM7	accA	Acetyl-coenzyme A carboxylase carboxyl transferase subunit alpha	biosynthetic process;carboxylic acid biosynthetic process;carboxylic acid metabolic process;cellular biosynthetic process;cellular ketone metabolic process;cellular lipid metabolic process;cellular metabolic process;cellular process;fatty acid biosynthetic process;fatty acid metabolic process;lipid biosynthetic process;lipid metabolic process;metabolic process;monocarboxylic acid metabolic proces…	acetyl-CoA carboxylase activity;adenyl nucleotide binding;adenyl ribonucleotide binding;ATP binding;binding;catalytic activity;CoA carboxylase activity;ligase activity;ligase activity, forming carbon-carbon bonds;nucleotide binding;purine nucleotide binding;purine ribonucleoside triphosphate binding;purine ribonucleotide binding;ribonucleotide binding	acetyl-CoA carboxylase complex;cell part;cytoplasmic part;intracellular part;macromolecular complex;protein complex	Carbon fixation pathways in prokaryotes;Fatty acid biosynthesis;Propanoate metabolism;Pyruvate metabolism;Tetracycline biosynthesis	35.07	14	56.4	14931000000	329		0.67277	-0.0891581	0.174824	26.6438	26.5336	26.6913	26.6705	26.6885	26.6407	26.6858	26.8808
Q2FXM8	Q2FXM8	pfkA	ATP-dependent 6-phosphofructokinase	alcohol catabolic process;alcohol metabolic process;carbohydrate catabolic process;carbohydrate metabolic process;catabolic process;cellular carbohydrate catabolic process;cellular carbohydrate metabolic process;cellular metabolic process;cellular process;fructose 6-phosphate metabolic process;fructose metabolic process;generation of precursor metabolites and energy;glucose catabolic process;gluc…	6-phosphofructokinase activity;adenyl nucleotide binding;adenyl ribonucleotide binding;ATP binding;binding;carbohydrate kinase activity;catalytic activity;cation binding;ion binding;kinase activity;metal ion binding;nucleotide binding;phosphofructokinase activity;phosphotransferase activity, alcohol group as acceptor;purine nucleotide binding;purine ribonucleoside triphosphate binding;purine ribo…	cell part;cytoplasm;intracellular part	Fructose and mannose metabolism;Galactose metabolism;Glycolysis / Gluconeogenesis;Methane metabolism;Pentose phosphate pathway	34.839	29	74.8	107530000000	820		0.598456	0.0849938	0.204975	29.1539	29.0543	28.9778	29.1042	28.9008	28.9767	28.9254	29.1474
Q2FXM9	Q2FXM9	pyk	Pyruvate kinase	alcohol catabolic process;alcohol metabolic process;carbohydrate catabolic process;carbohydrate metabolic process;catabolic process;cellular carbohydrate catabolic process;cellular carbohydrate metabolic process;cellular metabolic process;cellular process;generation of precursor metabolites and energy;glucose catabolic process;glucose metabolic process;glycolysis;hexose catabolic process;hexose m…	adenyl nucleotide binding;adenyl ribonucleotide binding;alkali metal ion binding;ATP binding;binding;catalytic activity;cation binding;ion binding;kinase activity;magnesium ion binding;metal ion binding;nucleotide binding;phosphotransferase activity, alcohol group as acceptor;potassium ion binding;purine nucleotide binding;purine ribonucleoside triphosphate binding;purine ribonucleotide binding;p…		Carbon fixation in photosynthetic organisms;Glycolysis / Gluconeogenesis;Purine metabolism;Pyruvate metabolism;Type II diabetes mellitus	63.102	82	92.6	435990000000	2833		0.796852	0.14614	0.133569	30.0607	29.874	30.0401	29.956	29.7738	29.7569	29.7388	30.0769
Q2FXN3	Q2FXN3	SAOUHSC_01802		acetyl-CoA catabolic process;acetyl-CoA metabolic process;carbohydrate metabolic process;catabolic process;cellular carbohydrate metabolic process;cellular catabolic process;cellular metabolic process;cellular process;coenzyme catabolic process;coenzyme metabolic process;cofactor catabolic process;cofactor metabolic process;metabolic process;primary metabolic process;tricarboxylic acid cycle	catalytic activity;transferase activity;transferase activity, transferring acyl groups;transferase activity, transferring acyl groups, acyl groups converted into alkyl on transfer		Citrate cycle (TCA cycle);Glyoxylate and dicarboxylate metabolism	32.392	10	41.1	5530900000	212	+	1.32268	-0.449773	0.0388331	24.4677	24.6806	24.2871	24.1926	25.0642	25.0934	24.8035	24.4659
Q2FXN4	Q2FXN4	SAOUHSC_01801	Isocitrate dehydrogenase [NADP]	acetyl-CoA catabolic process;acetyl-CoA metabolic process;carbohydrate metabolic process;carboxylic acid metabolic process;catabolic process;cellular aldehyde metabolic process;cellular carbohydrate metabolic process;cellular catabolic process;cellular ketone metabolic process;cellular metabolic process;cellular process;coenzyme catabolic process;coenzyme metabolic process;cofactor catabolic proc…	binding;catalytic activity;cation binding;coenzyme binding;cofactor binding;ion binding;isocitrate dehydrogenase (NADP+) activity;isocitrate dehydrogenase activity;magnesium ion binding;metal ion binding;NAD binding;nucleotide binding;oxidoreductase activity;oxidoreductase activity, acting on CH-OH group of donors;oxidoreductase activity, acting on the CH-OH group of donors, NAD or NADP as accept…		Citrate cycle (TCA cycle)	46.422	32	70.4	65803000000	676		0.41775	-0.0614195	0.311768	27.9833	27.855	27.9651	27.956	28.1556	27.8747	28.0064	27.9685
Q2FXN6	Q2FXN6	SAOUHSC_01800		biological regulation;biosynthetic process;cellular biosynthetic process;cellular macromolecule biosynthetic process;cellular macromolecule metabolic process;cellular metabolic process;cellular nitrogen compound metabolic process;cellular process;cellular response to stimulus;macromolecule biosynthetic process;macromolecule metabolic process;metabolic process;nitrogen compound metabolic process;n…	binding;DNA binding;nucleic acid binding		Two-component system	27.122	10	46.6	5022000000	269	+	4.91758	0.316326	0	25.1668	25.1504	25.1025	25.1867	24.79	24.8619	24.8354	24.8537
Q2FXN7	Q2FXN7	SAOUHSC_01799	Histidine kinase		adenyl nucleotide binding;adenyl ribonucleotide binding;ATP binding;binding;catalytic activity;kinase activity;molecular transducer activity;nucleotide binding;phosphotransferase activity, alcohol group as acceptor;phosphotransferase activity, nitrogenous group as acceptor;protein histidine kinase activity;protein kinase activity;purine nucleotide binding;purine ribonucleoside triphosphate bindin…	cell part;integral to membrane;intrinsic to membrane;membrane part	Two-component system	63.773	7	12.1	163890000	25		0.0532194	0.0591993	0.854138	22.0205	22.4316	22.5994	22.5451	21.3461	22.9357	22.8618	22.2161
Q2FXN9	Q2FXN9	SAOUHSC_01797	DNA polymerase	biosynthetic process;cellular biosynthetic process;cellular macromolecule biosynthetic process;cellular macromolecule metabolic process;cellular metabolic process;cellular nitrogen compound metabolic process;cellular process;DNA metabolic process;DNA replication;DNA-dependent DNA replication;macromolecule biosynthetic process;macromolecule metabolic process;metabolic process;nitrogen compound met…	3'-5' exonuclease activity;binding;catalytic activity;DNA binding;DNA polymerase activity;DNA-directed DNA polymerase activity;exonuclease activity;hydrolase activity;hydrolase activity, acting on ester bonds;nuclease activity;nucleic acid binding;nucleotidyltransferase activity;transferase activity;transferase activity, transferring phosphorus-containing groups		Base excision repair;DNA replication;Homologous recombination;Nucleotide excision repair;Purine metabolism;Pyrimidine metabolism	99.194	63	70.7	45385000000	1247	+	3.14039	0.312971	0.00216425	26.5858	26.5254	26.6103	26.509	26.2545	26.1342	26.2454	26.3447
Q2FXP0	Q2FXP0	SAOUHSC_01796		base-excision repair;cellular macromolecule metabolic process;cellular metabolic process;cellular nitrogen compound metabolic process;cellular process;cellular response to stimulus;cellular response to stress;DNA metabolic process;DNA repair;macromolecule metabolic process;metabolic process;nitrogen compound metabolic process;nucleic acid metabolic process;nucleobase-containing compound metabolic…	binding;carbon-oxygen lyase activity;catalytic activity;cation binding;damaged DNA binding;DNA binding;DNA N-glycosylase activity;DNA-(apurinic or apyrimidinic site) lyase activity;hydrolase activity;hydrolase activity, acting on glycosyl bonds;hydrolase activity, hydrolyzing N-glycosyl compounds;ion binding;lyase activity;metal ion binding;nucleic acid binding;oxidized base lesion DNA N-glycosyl…		Base excision repair	33.411	11	36.2	483540000	29		0.581168	-0.74781	0.212943	21.5098	23.6199	23.6795	22.8025	23.3613	24.5769	23.0378	23.6268
Q2FXP1	Q2FXP1	coaE	Dephospho-CoA kinase	biosynthetic process;cellular biosynthetic process;cellular metabolic process;cellular nitrogen compound metabolic process;cellular process;coenzyme A biosynthetic process;coenzyme A metabolic process;coenzyme biosynthetic process;coenzyme metabolic process;cofactor biosynthetic process;cofactor metabolic process;heterocycle metabolic process;metabolic process;nitrogen compound metabolic process;…	adenyl nucleotide binding;adenyl ribonucleotide binding;ATP binding;binding;catalytic activity;dephospho-CoA kinase activity;kinase activity;nucleotide binding;phosphotransferase activity, alcohol group as acceptor;purine nucleotide binding;purine ribonucleoside triphosphate binding;purine ribonucleotide binding;ribonucleotide binding;transferase activity;transferase activity, transferring phosph…	cell part;cytoplasm;intracellular part	Pantothenate and CoA biosynthesis	23.592	20	74.9	25838000000	509	+	2.81056	0.227942	0.00327915	26.4855	26.3761	26.5481	26.5348	26.2517	26.2233	26.2924	26.2653
Q2FXP2	Q2FXP2	SAOUHSC_01794	Glyceraldehyde-3-phosphate dehydrogenase	alcohol metabolic process;carbohydrate metabolic process;cellular carbohydrate metabolic process;cellular metabolic process;cellular process;glucose metabolic process;hexose metabolic process;metabolic process;monosaccharide metabolic process;primary metabolic process;small molecule metabolic process	binding;catalytic activity;coenzyme binding;cofactor binding;NAD binding;NADP binding;nucleotide binding;oxidoreductase activity;oxidoreductase activity, acting on the aldehyde or oxo group of donors;oxidoreductase activity, acting on the aldehyde or oxo group of donors, NAD or NADP as acceptor		Alzheimer's disease;Glycolysis / Gluconeogenesis	36.979	43	82.1	168800000000	1016	+	2.24161	-1.81017	0.00751402	25.82	26.0727	24.8832	25.6182	28.0929	27.0453	27.8806	26.6161
Q2FXP3	Q2FXP3	nrdR	Transcriptional repressor NrdR	biological regulation;biosynthetic process;cellular biosynthetic process;cellular macromolecule biosynthetic process;cellular macromolecule metabolic process;cellular metabolic process;cellular nitrogen compound metabolic process;cellular process;macromolecule biosynthetic process;macromolecule metabolic process;metabolic process;negative regulation of biological process;negative regulation of bi…	adenyl nucleotide binding;adenyl ribonucleotide binding;ATP binding;binding;cation binding;DNA binding;ion binding;metal ion binding;nucleic acid binding;nucleotide binding;purine nucleotide binding;purine ribonucleoside triphosphate binding;purine ribonucleotide binding;ribonucleotide binding;transition metal ion binding;zinc ion binding			18.203	7	58.3	7353100000	206		0.39662	-0.082263	0.326728	25.4473	25.338	25.3947	25.6218	25.4517	25.6315	25.6616	25.386
Q2FXP4	Q2FXP4	SAOUHSC_01792						54.532	11	33.3	689730000	72		0.603449	0.76651	0.203055	23.4546	23.4418	23.8744	23.7335	23.6567	21.1009	23.3905	23.2901
Q2FXP5	Q2FXP5	SAOUHSC_01791			adenyl nucleotide binding;adenyl ribonucleotide binding;ATP binding;binding;nucleotide binding;purine nucleotide binding;purine ribonucleoside triphosphate binding;purine ribonucleotide binding;ribonucleotide binding			35.635	18	64.4	10047000000	439	+	1.38445	-0.174648	0.0340537	25.0416	25.0503	24.9602	25.2113	25.2835	25.2603	25.3019	25.1163
Q2FXP7	Q2FXP7	thrS	Threonine--tRNA ligase	amine metabolic process;amino acid activation;carboxylic acid metabolic process;cellular amine metabolic process;cellular amino acid metabolic process;cellular ketone metabolic process;cellular macromolecule metabolic process;cellular metabolic process;cellular nitrogen compound metabolic process;cellular process;macromolecule metabolic process;metabolic process;ncRNA metabolic process;nitrogen c…	adenyl nucleotide binding;adenyl ribonucleotide binding;aminoacyl-tRNA ligase activity;ATP binding;binding;catalytic activity;cation binding;ion binding;ligase activity;ligase activity, forming aminoacyl-tRNA and related compounds;ligase activity, forming carbon-oxygen bonds;metal ion binding;nucleotide binding;purine nucleotide binding;purine ribonucleoside triphosphate binding;purine ribonucleo…	cell part;cytoplasm;intracellular part	Aminoacyl-tRNA biosynthesis	74.487	63	77.7	230260000000	2117		0.103356	-0.0215673	0.732966	28.7671	28.7074	28.6427	28.7996	28.7509	28.7302	28.594	28.9279
Q2FXP9	Q2FXP9	infC	Translation initiation factor IF-3		binding;nucleic acid binding;RNA binding;translation factor activity, nucleic acid binding;translation initiation factor activity	cell part;cytoplasm;intracellular part		20.213	25	75.4	94068000000	826	+	3.09829	-0.703484	0.00205505	28.7694	28.9181	28.4973	28.8436	29.4319	29.6504	29.416	29.3441
Q2FXQ0	Q2FXQ0	rpmI	50S ribosomal protein L35	biosynthetic process;cellular biosynthetic process;cellular macromolecule biosynthetic process;cellular macromolecule metabolic process;cellular metabolic process;cellular process;cellular protein metabolic process;macromolecule biosynthetic process;macromolecule metabolic process;metabolic process;primary metabolic process;protein metabolic process;translation	structural constituent of ribosome;structural molecule activity	cell part;cytoplasmic part;intracellular non-membrane-bounded organelle;intracellular organelle;intracellular part;macromolecular complex;non-membrane-bounded organelle;organelle;ribonucleoprotein complex;ribosome	Ribosome	7.6972	9	53	150370000000	432	+	1.47306	-0.484664	0.0289267	29.4496	29.567	29.2045	29.7482	30.2109	30.1355	29.6043	29.9573
Q2FXQ1	Q2FXQ1	rplT	50S ribosomal protein L20	biosynthetic process;cellular biosynthetic process;cellular component assembly;cellular component assembly at cellular level;cellular component organization;cellular component organization at cellular level;cellular component organization or biogenesis;cellular component organization or biogenesis at cellular level;cellular macromolecular complex assembly;cellular macromolecular complex subunit o…	binding;nucleic acid binding;RNA binding;rRNA binding;structural constituent of ribosome;structural molecule activity	cell part;cytoplasmic part;intracellular non-membrane-bounded organelle;intracellular organelle;intracellular part;macromolecular complex;non-membrane-bounded organelle;organelle;ribonucleoprotein complex;ribosome	Ribosome	13.686	31	89	198410000000	987	+	1.56619	-0.558721	0.0235514	30.4689	30.608	30.0638	30.5884	30.9975	31.2814	30.5945	31.0906
Q2FXQ3	Q2FXQ3	SAOUHSC_01782			catalytic activity;hydrolase activity			22.946	12	63.9	23287000000	367		0.623479	0.166352	0.194322	27.8318	27.6135	27.9577	27.8679	27.6145	27.5761	27.4665	27.9483
Q2FXQ4	Q2FXQ4	SAOUHSC_01781						36.431	6	23.6	1994500000	80		1.19859	0.376331	0.0519392	24.5806	24.6171	24.7529	24.1667	24.2692	23.9249	24.0286	24.3892
Q2FXQ6	Q2FXQ6	tig	Trigger factor	cell cycle;cell division;cellular macromolecule metabolic process;cellular metabolic process;cellular process;cellular protein metabolic process;establishment of localization;establishment of protein localization;macromolecule metabolic process;metabolic process;primary metabolic process;protein folding;protein metabolic process;protein transport;transport	catalytic activity;cis-trans isomerase activity;isomerase activity;peptidyl-prolyl cis-trans isomerase activity	cell part;cytoplasm;intracellular part		48.608	50	68.8	400850000000	1993		0.851821	0.0789075	0.117756	30.3608	30.2749	30.3789	30.4166	30.2041	30.2751	30.2613	30.375
Q2FXQ7	Q2FXQ7	clpX	ATP-dependent Clp protease ATP-binding subunit ClpX	cellular macromolecule metabolic process;cellular metabolic process;cellular process;cellular protein metabolic process;macromolecule metabolic process;metabolic process;primary metabolic process;protein folding;protein metabolic process	adenyl nucleotide binding;adenyl ribonucleotide binding;ATP binding;binding;cation binding;ion binding;metal ion binding;nucleotide binding;purine nucleotide binding;purine ribonucleoside triphosphate binding;purine ribonucleotide binding;ribonucleotide binding;transition metal ion binding;zinc ion binding		Cell cycle - Caulobacter	46.297	33	76.9	79735000000	1200		0.11159	-0.0212455	0.714674	28.5711	28.5824	28.4915	28.5807	28.4457	28.4858	28.6502	28.729
Q2FXQ8	Q2FXQ8	engB	Probable GTP-binding protein EngB	barrier septum formation;cellular component assembly;cellular component assembly at cellular level;cellular component organization;cellular component organization at cellular level;cellular component organization or biogenesis;cellular component organization or biogenesis at cellular level;cellular process;cytokinetic process	binding;catalytic activity;cation binding;GTP binding;GTPase activity;guanyl nucleotide binding;guanyl ribonucleotide binding;hydrolase activity;hydrolase activity, acting on acid anhydrides;hydrolase activity, acting on acid anhydrides, in phosphorus-containing anhydrides;ion binding;magnesium ion binding;metal ion binding;nucleoside-triphosphatase activity;nucleotide binding;purine nucleotide b…			22.685	13	66.3	13119000000	234		0.0958659	0.013268	0.747641	27.4552	27.4522	27.418	27.623	27.5045	27.4686	27.5056	27.4168
Q2FXQ9	Q2FXQ9	hemA	Glutamyl-tRNA reductase	biosynthetic process;cellular aromatic compound metabolic process;cellular biosynthetic process;cellular metabolic process;cellular nitrogen compound biosynthetic process;cellular nitrogen compound metabolic process;cellular process;cofactor biosynthetic process;cofactor metabolic process;heterocycle biosynthetic process;heterocycle metabolic process;metabolic process;nitrogen compound metabolic …	binding;catalytic activity;coenzyme binding;cofactor binding;glutamyl-tRNA reductase activity;NADP binding;nucleotide binding;oxidoreductase activity;oxidoreductase activity, acting on the aldehyde or oxo group of donors;oxidoreductase activity, acting on the aldehyde or oxo group of donors, NAD or NADP as acceptor		Porphyrin and chlorophyll metabolism	50.159	18	55.8	3472900000	92	+	3.57372	4.3079	0.000827586	26.6424	26.7575	27.2233	27.2349	22.0387	22.0575	24.2826	22.2478
Q2FXR2	Q2FXR2	SAOUHSC_01773		biosynthetic process;cellular biosynthetic process;cellular metabolic process;cellular nitrogen compound biosynthetic process;cellular nitrogen compound metabolic process;cellular process;heterocycle biosynthetic process;heterocycle metabolic process;metabolic process;nitrogen compound metabolic process;tetrapyrrole biosynthetic process;tetrapyrrole metabolic process	carbon-oxygen lyase activity;catalytic activity;hydro-lyase activity;lyase activity;uroporphyrinogen-III synthase activity		Porphyrin and chlorophyll metabolism	25.418	3	11.3	277160000	27		0.692022	-0.451365	0.168175	22.2435	22.5416	21.7152	21.9404	22.339	22.2146	22.3573	23.3352
Q2FXR3	Q2FXR3	hemB	Delta-aminolevulinic acid dehydratase	biosynthetic process;cellular aromatic compound metabolic process;cellular biosynthetic process;cellular metabolic process;cellular nitrogen compound biosynthetic process;cellular nitrogen compound metabolic process;cellular process;cofactor biosynthetic process;cofactor metabolic process;heterocycle biosynthetic process;heterocycle metabolic process;metabolic process;nitrogen compound metabolic …	binding;carbon-oxygen lyase activity;catalytic activity;cation binding;hydro-lyase activity;ion binding;lyase activity;metal ion binding;porphobilinogen synthase activity		Porphyrin and chlorophyll metabolism	36.582	27	76.5	54239000000	626		0.420057	0.0605216	0.310649	28.339	28.2924	28.1829	28.3766	28.1453	28.1911	28.3684	28.2441
Q2FXR4	Q2FXR4	hemL1	Glutamate-1-semialdehyde 2,1-aminomutase 1	biosynthetic process;cellular aromatic compound metabolic process;cellular biosynthetic process;cellular metabolic process;cellular nitrogen compound biosynthetic process;cellular nitrogen compound metabolic process;cellular process;cofactor biosynthetic process;cofactor metabolic process;heterocycle biosynthetic process;heterocycle metabolic process;metabolic process;nitrogen compound metabolic …	binding;catalytic activity;cofactor binding;glutamate-1-semialdehyde 2,1-aminomutase activity;intramolecular transferase activity;intramolecular transferase activity, transferring amino groups;isomerase activity;pyridoxal phosphate binding;transaminase activity;transferase activity;transferase activity, transferring nitrogenous groups;vitamin B6 binding;vitamin binding	cell part;cytoplasm;intracellular part	Porphyrin and chlorophyll metabolism	46.388	37	71.3	46579000000	1020	+	1.98611	0.16108	0.010728	28.0567	28.0751	28.1204	28.0792	27.8069	27.9138	27.9796	27.9867
Q2FXR7	Q2FXR7	SAOUHSC_01768		base-excision repair;cellular macromolecule metabolic process;cellular metabolic process;cellular nitrogen compound metabolic process;cellular process;cellular response to stimulus;cellular response to stress;DNA metabolic process;DNA repair;macromolecule metabolic process;metabolic process;nitrogen compound metabolic process;nucleic acid metabolic process;nucleobase-containing compound metabolic…	alkylbase DNA N-glycosylase activity;catalytic activity;DNA N-glycosylase activity;DNA-3-methyladenine glycosylase I activity;hydrolase activity;hydrolase activity, acting on glycosyl bonds;hydrolase activity, hydrolyzing N-glycosyl compounds		Base excision repair	21.416	8	39.8	1711200000	65	+	1.67622	0.68099	0.0177077	24.5561	25.2213	25.3127	24.6228	24.2299	24.0968	24.1362	24.5261
Q2FXR8	Q2FXR8	valS	Valine--tRNA ligase	amine metabolic process;amino acid activation;carboxylic acid metabolic process;cellular amine metabolic process;cellular amino acid metabolic process;cellular ketone metabolic process;cellular macromolecule metabolic process;cellular metabolic process;cellular nitrogen compound metabolic process;cellular process;macromolecule metabolic process;metabolic process;ncRNA metabolic process;nitrogen c…	adenyl nucleotide binding;adenyl ribonucleotide binding;aminoacyl-tRNA editing activity;aminoacyl-tRNA ligase activity;ATP binding;binding;carboxylic ester hydrolase activity;catalytic activity;hydrolase activity;hydrolase activity, acting on ester bonds;ligase activity;ligase activity, forming aminoacyl-tRNA and related compounds;ligase activity, forming carbon-oxygen bonds;nucleotide binding;pu…	cell part;cytoplasm;intracellular part	Aminoacyl-tRNA biosynthesis;Valine, leucine and isoleucine biosynthesis	101.72	78	76.4	78382000000	1825		0.354445	-0.0518208	0.364724	27.2611	27.2915	27.37	27.3599	27.2908	27.3514	27.3079	27.5396
Q2FXR9	Q2FXR9	SAOUHSC_01766			acid-amino acid ligase activity;adenyl nucleotide binding;adenyl ribonucleotide binding;ATP binding;binding;catalytic activity;ligase activity;ligase activity, forming carbon-nitrogen bonds;nucleotide binding;purine nucleotide binding;purine ribonucleoside triphosphate binding;purine ribonucleotide binding;ribonucleotide binding;tetrahydrofolylpolyglutamate synthase activity		Folate biosynthesis	47.856	18	53.9	7247300000	307	+	1.3722	-0.342375	0.035007	24.9471	25.3604	25.127	25.3624	25.4412	25.6502	25.3505	25.7246
Q2FXS4	Q2FXS4	SAOUHSC_01761						18.385	7	40.1	1485600000	80	+	5.22524	2.63239	0	25.8394	25.7278	26.1655	25.3705	23.1192	22.9997	23.3302	23.1244
Q2FXS6	Q2FXS6	SAOUHSC_01759	Cell shape-determining protein MreC	biological regulation;regulation of anatomical structure morphogenesis;regulation of biological process;regulation of biological quality;regulation of cell morphogenesis;regulation of cell shape;regulation of cellular component organization;regulation of cellular process;regulation of developmental process				31.01	21	63.2	7147800000	406		0.11243	0.0262794	0.713742	24.9516	24.9394	25.007	25.0556	25.0596	24.8725	24.7794	25.137
Q2FXS8	Q2FXS8	rplU	50S ribosomal protein L21	biosynthetic process;cellular biosynthetic process;cellular macromolecule biosynthetic process;cellular macromolecule metabolic process;cellular metabolic process;cellular process;cellular protein metabolic process;macromolecule biosynthetic process;macromolecule metabolic process;metabolic process;primary metabolic process;protein metabolic process;translation	binding;nucleic acid binding;RNA binding;rRNA binding;structural constituent of ribosome;structural molecule activity	cell part;cytoplasmic part;intracellular non-membrane-bounded organelle;intracellular organelle;intracellular part;macromolecular complex;non-membrane-bounded organelle;organelle;ribonucleoprotein complex;ribosome	Ribosome	11.333	20	90.2	156270000000	594		0.509123	-0.172587	0.253618	30.3595	30.327	30.3269	30.6003	30.6985	30.7035	30.1548	30.7472
Q2FXS9	Q2FXS9	SAOUHSC_01756						11.692	2	34	270010000	9		1.19031	0.796733	0.0528654	23.9949	23.6412	24.0901	23.0034	22.5996	22.3594	23.4862	23.0976
Q2FXT0	Q2FXT0	rpmA	50S ribosomal protein L27	biosynthetic process;cellular biosynthetic process;cellular macromolecule biosynthetic process;cellular macromolecule metabolic process;cellular metabolic process;cellular process;cellular protein metabolic process;macromolecule biosynthetic process;macromolecule metabolic process;metabolic process;primary metabolic process;protein metabolic process;translation	structural constituent of ribosome;structural molecule activity	cell part;cytoplasmic part;intracellular non-membrane-bounded organelle;intracellular organelle;intracellular part;macromolecular complex;non-membrane-bounded organelle;organelle;ribonucleoprotein complex;ribosome	Ribosome	10.315	19	68.1	190660000000	710	+	1.45211	-0.348868	0.0297384	30.405	30.3886	30.3993	30.5533	30.8661	30.929	30.4194	30.9271
Q2FXT1	Q2FXT1	obg	GTPase Obg		binding;catalytic activity;cation binding;GTP binding;GTPase activity;guanyl nucleotide binding;guanyl ribonucleotide binding;hydrolase activity;hydrolase activity, acting on acid anhydrides;hydrolase activity, acting on acid anhydrides, in phosphorus-containing anhydrides;ion binding;magnesium ion binding;metal ion binding;nucleoside-triphosphatase activity;nucleotide binding;purine nucleotide b…	cell part;cytoplasm;intracellular part		47.235	39	90.9	44068000000	872	+	1.58447	-0.16358	0.0227886	27.954	28.0163	28.062	28.1159	28.1063	28.3129	28.1653	28.218
Q2FXT2	Q2FXT2	SAOUHSC_01752	UPF0735 ACT domain-containing protein SAOUHSC_01752	amine biosynthetic process;amine metabolic process;aromatic amino acid family biosynthetic process;aromatic amino acid family biosynthetic process, prephenate pathway;aromatic amino acid family metabolic process;aromatic compound biosynthetic process;biosynthetic process;carboxylic acid biosynthetic process;carboxylic acid metabolic process;cellular amine metabolic process;cellular amino acid bio…	amine binding;amino acid binding;binding;carboxylic acid binding		Phenylalanine, tyrosine and tryptophan biosynthesis	17.343	1	9.9	344830000	4		0.143275	-0.0970774	0.65255	22.8639	22.9415	22.8686	23.0641	23.3248	22.3939	23.5329	22.8749
Q2FXT3	Q2FXT3	ruvA	Holliday junction ATP-dependent DNA helicase RuvA	cell communication;cellular macromolecule metabolic process;cellular metabolic process;cellular nitrogen compound metabolic process;cellular process;cellular response to external stimulus;cellular response to extracellular stimulus;cellular response to stimulus;cellular response to stress;DNA metabolic process;DNA recombination;DNA repair;macromolecule metabolic process;metabolic process;nitrogen…	adenyl nucleotide binding;adenyl ribonucleotide binding;ATP binding;binding;catalytic activity;DNA binding;DNA helicase activity;four-way junction helicase activity;helicase activity;hydrolase activity;hydrolase activity, acting on acid anhydrides;hydrolase activity, acting on acid anhydrides, in phosphorus-containing anhydrides;nucleic acid binding;nucleoside-triphosphatase activity;nucleotide b…	cell part;DNA helicase complex;Holliday junction helicase complex;intracellular part;macromolecular complex;protein complex	Homologous recombination	22.262	17	90	11186000000	276	+	2.40858	-0.306105	0.00610363	26.3555	26.2911	26.0967	26.3254	26.5973	26.4768	26.6323	26.5866
Q2FXT4	Q2FXT4	ruvB	Holliday junction ATP-dependent DNA helicase RuvB	cell communication;cellular macromolecule metabolic process;cellular metabolic process;cellular nitrogen compound metabolic process;cellular process;cellular response to external stimulus;cellular response to extracellular stimulus;cellular response to stimulus;cellular response to stress;DNA metabolic process;DNA recombination;DNA repair;macromolecule metabolic process;metabolic process;nitrogen…	adenyl nucleotide binding;adenyl ribonucleotide binding;ATP binding;binding;catalytic activity;DNA binding;DNA helicase activity;four-way junction helicase activity;helicase activity;hydrolase activity;hydrolase activity, acting on acid anhydrides;hydrolase activity, acting on acid anhydrides, in phosphorus-containing anhydrides;nucleic acid binding;nucleoside-triphosphatase activity;nucleotide b…		Homologous recombination	37.718	22	80.8	4862500000	312		0.170747	0.0346394	0.600382	24.4628	24.3983	24.6194	24.5228	24.4912	24.3015	24.4646	24.6074
Q2FXT5	Q2FXT5	queA	S-adenosylmethionine:tRNA ribosyltransferase-isomerase	7-methylguanosine biosynthetic process;7-methylguanosine metabolic process;biosynthetic process;cellular biosynthetic process;cellular macromolecule metabolic process;cellular metabolic process;cellular nitrogen compound biosynthetic process;cellular nitrogen compound metabolic process;cellular process;guanosine biosynthetic process;guanosine metabolic process;heterocycle biosynthetic process;het…	catalytic activity;isomerase activity;transferase activity	cell part;cytoplasm;intracellular part		38.968	16	46	5952600000	229		0.90375	-0.178819	0.103036	25.9845	25.8461	26.1655	25.7975	26.1254	26.0708	26.0258	26.2869
Q2FXT6	Q2FXT6	tgt	Queuine tRNA-ribosyltransferase	7-methylguanosine biosynthetic process;7-methylguanosine metabolic process;biosynthetic process;cellular biosynthetic process;cellular macromolecule metabolic process;cellular metabolic process;cellular nitrogen compound biosynthetic process;cellular nitrogen compound metabolic process;cellular process;guanosine biosynthetic process;guanosine metabolic process;heterocycle biosynthetic process;het…	binding;catalytic activity;cation binding;ion binding;metal ion binding;queuine tRNA-ribosyltransferase activity;transferase activity;transferase activity, transferring glycosyl groups;transferase activity, transferring pentosyl groups			43.309	25	57.5	20191000000	588	+	3.60301	-0.405529	0.000869565	25.9609	25.9341	25.925	26.0266	26.2901	26.3166	26.3595	26.5025
Q2FXT7	Q2FXT7	SAOUHSC_01747					Bacterial secretion system;Protein export	9.6713	8	68.6	50549000000	319		0.301864	0.0920091	0.422712	29.1723	29.2382	29.0636	29.5349	29.2115	29.3258	28.9499	29.1537
Q2FXT8	Q2FXT8	SAOUHSC_01746		establishment of localization;establishment of localization in cell;establishment of protein localization;intracellular protein transport;intracellular transport;protein transport;transport	active transmembrane transporter activity;macromolecule transmembrane transporter activity;P-P-bond-hydrolysis-driven protein transmembrane transporter activity;P-P-bond-hydrolysis-driven transmembrane transporter activity;primary active transmembrane transporter activity;protein transmembrane transporter activity;protein transporter activity;substrate-specific transmembrane transporter activity;…	cell part;integral to membrane;intrinsic to membrane;membrane;membrane part;plasma membrane	Bacterial secretion system;Protein export	82.051	35	39.9	21872000000	670		1.15825	-0.257512	0.0561232	26.2115	26.3694	26.2392	26.3956	26.6954	26.6647	26.2413	26.6444
Q2FXT9	Q2FXT9	SAOUHSC_01744		cellular macromolecule metabolic process;cellular metabolic process;cellular nitrogen compound metabolic process;cellular process;cellular response to stimulus;cellular response to stress;DNA metabolic process;DNA recombination;DNA repair;macromolecule metabolic process;metabolic process;nitrogen compound metabolic process;nucleic acid metabolic process;nucleobase-containing compound metabolic pr…	5'-3' exonuclease activity;binding;catalytic activity;exonuclease activity;hydrolase activity;hydrolase activity, acting on ester bonds;nuclease activity;nucleic acid binding		Base excision repair;Homologous recombination;Mismatch repair	85.61	22	37.6	7281200000	291	+	2.86435	-0.421557	0.00326038	25.2925	25.2896	25.0625	25.2909	25.7272	25.5962	25.7488	25.5496
Q2FXU0	Q2FXU0	apt	Adenine phosphoribosyltransferase	adenine biosynthetic process;adenine metabolic process;adenine salvage;AMP biosynthetic process;AMP metabolic process;AMP salvage;biosynthetic process;cellular aromatic compound metabolic process;cellular biosynthetic process;cellular metabolic compound salvage;cellular metabolic process;cellular nitrogen compound biosynthetic process;cellular nitrogen compound metabolic process;cellular process;…	adenine phosphoribosyltransferase activity;catalytic activity;transferase activity;transferase activity, transferring glycosyl groups;transferase activity, transferring pentosyl groups	cell part;cytoplasm;intracellular part	Purine metabolism	19.117	13	83.1	4133800000	162	+	1.508	-0.195841	0.0266985	25.269	25.3143	25.382	25.1982	25.4008	25.4183	25.4725	25.6552
Q2FXU1	Q2FXU1	SAOUHSC_01742		cellular metabolic process;cellular nitrogen compound metabolic process;cellular process;guanosine tetraphosphate metabolic process;heterocycle metabolic process;metabolic process;nitrogen compound metabolic process;nucleobase-containing compound metabolic process;nucleobase-containing small molecule metabolic process;nucleoside bisphosphate metabolic process;nucleoside phosphate metabolic proces…	amine binding;amino acid binding;binding;carboxylic acid binding;catalytic activity;diphosphotransferase activity;GTP diphosphokinase activity;kinase activity;transferase activity;transferase activity, transferring phosphorus-containing groups		Purine metabolism	83.693	50	60.8	15662000000	602		0.668566	0.115379	0.176322	25.1222	25.2016	25.2123	25.1105	25.0649	25.0098	24.8645	25.2459
Q2FXU2	Q2FXU2	dtd	D-aminoacyl-tRNA deacylase	amine catabolic process;amine metabolic process;carboxylic acid catabolic process;carboxylic acid metabolic process;catabolic process;cellular amine metabolic process;cellular amino acid catabolic process;cellular amino acid metabolic process;cellular catabolic process;cellular ketone metabolic process;cellular metabolic process;cellular nitrogen compound metabolic process;cellular process;D-amin…	catalytic activity;hydrolase activity;hydrolase activity, acting on ester bonds	cell part;cytoplasm;intracellular part		16.697	10	58.7	6193300000	157		1.11096	0.431119	0.0615524	26.0009	25.8691	26.0815	26.1582	25.6436	25.7311	25.0525	25.9579
Q2FXU3	Q2FXU3	lytH	Probable cell wall amidase LytH	amine metabolic process;aminoglycan catabolic process;aminoglycan metabolic process;carbohydrate catabolic process;carbohydrate metabolic process;catabolic process;cell wall organization;cell wall organization or biogenesis;cellular component organization or biogenesis;glycosaminoglycan catabolic process;glycosaminoglycan metabolic process;macromolecule catabolic process;macromolecule metabolic p…	catalytic activity;hydrolase activity;hydrolase activity, acting on carbon-nitrogen (but not peptide) bonds;hydrolase activity, acting on carbon-nitrogen (but not peptide) bonds, in linear amides;N-acetylmuramoyl-L-alanine amidase activity	extracellular region		32.694	11	49.1	2001200000	125		0.650487	-0.202027	0.182659	24.2282	24.0421	24.05	24.6297	24.5409	24.2773	24.4828	24.4571
Q2FXU4	Q2FXU4	hisS	Histidine--tRNA ligase	amine metabolic process;amino acid activation;carboxylic acid metabolic process;cellular amine metabolic process;cellular amino acid metabolic process;cellular ketone metabolic process;cellular macromolecule metabolic process;cellular metabolic process;cellular nitrogen compound metabolic process;cellular process;histidyl-tRNA aminoacylation;macromolecule metabolic process;metabolic process;ncRNA…	adenyl nucleotide binding;adenyl ribonucleotide binding;aminoacyl-tRNA ligase activity;ATP binding;binding;catalytic activity;histidine-tRNA ligase activity;ligase activity;ligase activity, forming aminoacyl-tRNA and related compounds;ligase activity, forming carbon-oxygen bonds;nucleotide binding;purine nucleotide binding;purine ribonucleoside triphosphate binding;purine ribonucleotide binding;r…	cell part;cytoplasm;intracellular part	Aminoacyl-tRNA biosynthesis	48.282	23	54.3	17768000000	434	+	1.5041	-0.180892	0.0269226	26.5889	26.4578	26.6125	26.5097	26.6044	26.6745	26.7594	26.8541
Q2FXU5	Q2FXU5	aspS	Aspartate--tRNA ligase	amine metabolic process;amino acid activation;carboxylic acid metabolic process;cellular amine metabolic process;cellular amino acid metabolic process;cellular ketone metabolic process;cellular macromolecule metabolic process;cellular metabolic process;cellular nitrogen compound metabolic process;cellular process;macromolecule metabolic process;metabolic process;ncRNA metabolic process;nitrogen c…	adenyl nucleotide binding;adenyl ribonucleotide binding;aminoacyl-tRNA ligase activity;aspartate-tRNA ligase activity;ATP binding;binding;catalytic activity;ligase activity;ligase activity, forming aminoacyl-tRNA and related compounds;ligase activity, forming carbon-oxygen bonds;nucleic acid binding;nucleotide binding;purine nucleotide binding;purine ribonucleoside triphosphate binding;purine rib…	cell part;cytoplasm;intracellular part	Aminoacyl-tRNA biosynthesis	66.628	52	81.5	53016000000	1215		0.883211	-0.107147	0.109117	26.8582	26.8003	26.8439	27.0237	26.9158	26.9483	27.0071	27.0834
Q2FXU7	Q2FXU7	SAOUHSC_01735			catalytic activity;small protein activating enzyme activity			28.641	13	56	6126800000	222		0.59007	0.124709	0.208569	25.7485	26.044	25.8596	25.8745	25.7729	25.7487	25.5607	25.9454
Q2FXU8	Q2FXU8	SAOUHSC_01734		biosynthetic process;cellular biosynthetic process;cellular macromolecule biosynthetic process;cellular macromolecule metabolic process;cellular metabolic process;cellular nitrogen compound metabolic process;cellular process;DNA metabolic process;DNA replication;macromolecule biosynthetic process;macromolecule metabolic process;metabolic process;nitrogen compound metabolic process;nucleic acid me…	adenyl nucleotide binding;adenyl ribonucleotide binding;ATP binding;binding;DNA binding;nucleic acid binding;nucleotide binding;purine nucleotide binding;purine ribonucleoside triphosphate binding;purine ribonucleotide binding;ribonucleotide binding			46.277	30	74.5	8018800000	462	+	2.60834	-0.307495	0.00468468	24.4723	24.5101	24.3502	24.4748	24.7485	24.7021	24.9054	24.6814
Q2FXV0	Q2FXV0	SAOUHSC_01732						12.768	8	59.5	9825300000	289	+	3.06668	0.554778	0.00200897	26.534	26.6357	26.5036	26.664	25.9957	25.8509	26.0253	26.2464
Q2FXV1	Q2FXV1	SAOUHSC_01730	UPF0337 protein SAOUHSC_01730					6.6824	3	56.7	1740700000	39	+	1.96679	-0.787183	0.0111842	24.0483	23.962	24.113	23.8484	24.351	24.6757	25.3499	24.7439
Q2FXV2	Q2FXV2	SAOUHSC_01729						5.6551	4	52.1	1754900000	58	+	1.75824	-0.685194	0.0159578	24.1596	24.0604	23.831	24.4108	24.9491	24.2831	24.9542	25.0162
Q2FXV3	Q2FXV3	SAOUHSC_01728			catalytic activity;oxidoreductase activity;oxidoreductase activity, acting on paired donors, with incorporation or reduction of molecular oxygen			37.984	10	49	2980000000	175	+	3.3879	0.936028	0.00131765	25.0269	24.8386	24.7397	24.7465	24.1869	23.8541	23.6308	23.9357
Q2FXV4	Q2FXV4	SAOUHSC_01727			binding;catalytic activity;cofactor binding;pyridoxal phosphate binding;vitamin B6 binding;vitamin binding		Sulfur relay system;Thiamine metabolism	42.484	11	47.4	3762700000	190		0.600156	-0.117863	0.204082	25.118	25.0859	24.9152	25.1234	25.0595	25.3012	25.3268	25.0264
Q2FXV6	Q2FXV6	mnmA	tRNA-specific 2-thiouridylase MnmA	cellular macromolecule metabolic process;cellular metabolic process;cellular nitrogen compound metabolic process;cellular process;macromolecule metabolic process;macromolecule modification;metabolic process;ncRNA metabolic process;ncRNA processing;nitrogen compound metabolic process;nucleic acid metabolic process;nucleobase-containing compound metabolic process;primary metabolic process;RNA metab…	adenyl nucleotide binding;adenyl ribonucleotide binding;ATP binding;binding;catalytic activity;nucleic acid binding;nucleotide binding;purine nucleotide binding;purine ribonucleoside triphosphate binding;purine ribonucleotide binding;ribonucleotide binding;RNA binding;sulfurtransferase activity;transferase activity;transferase activity, transferring sulfur-containing groups;tRNA binding	cell part;cytoplasm;intracellular part		42.15	18	50.5	16786000000	410	+	1.60063	-0.209897	0.0220703	25.6012	25.5678	25.3912	25.6454	25.6851	25.7263	25.7475	25.8863
Q2FXV7	Q2FXV7	SAOUHSC_01724						25.701	4	32	806220000	42		0.0599948	0.0353308	0.835548	23.295	23.1519	22.8983	23.8301	23.0554	23.3101	23.3648	23.3037
Q2FXV8	Q2FXV8	recD2	ATP-dependent RecD-like DNA helicase		adenyl nucleotide binding;adenyl ribonucleotide binding;ATP binding;ATPase activity;ATPase activity, coupled;ATP-dependent DNA helicase activity;ATP-dependent helicase activity;binding;catalytic activity;DNA binding;DNA helicase activity;DNA-dependent ATPase activity;helicase activity;hydrolase activity;hydrolase activity, acting on acid anhydrides;hydrolase activity, acting on acid anhydrides, i…		Homologous recombination	93.048	20	31.5	3419800000	198		1.16464	-0.201429	0.0553028	24.1676	24.393	24.1388	24.0695	24.3598	24.3179	24.5653	24.3316
Q2FXV9	Q2FXV9	alaS	Alanine--tRNA ligase	alanyl-tRNA aminoacylation;amine metabolic process;amino acid activation;carboxylic acid metabolic process;cellular amine metabolic process;cellular amino acid metabolic process;cellular ketone metabolic process;cellular macromolecule metabolic process;cellular metabolic process;cellular nitrogen compound metabolic process;cellular process;macromolecule metabolic process;metabolic process;ncRNA m…	adenyl nucleotide binding;adenyl ribonucleotide binding;alanine-tRNA ligase activity;aminoacyl-tRNA ligase activity;ATP binding;binding;catalytic activity;cation binding;ion binding;ligase activity;ligase activity, forming aminoacyl-tRNA and related compounds;ligase activity, forming carbon-oxygen bonds;metal ion binding;nucleic acid binding;nucleotide binding;purine nucleotide binding;purine rib…	cell part;cytoplasm;intracellular part	Aminoacyl-tRNA biosynthesis	98.519	76	67.4	73541000000	1632		1.00374	-0.0952911	0.0823601	27.0557	26.9639	26.9941	27.0556	27.086	27.1575	27.0049	27.2021
Q2FXW0	Q2FXW0	SAOUHSC_01721	UPF0297 protein SAOUHSC_01721					10.303	10	95.3	31230000000	354		1.14941	0.203463	0.0573939	28.1606	28.1206	28.2	27.9078	28.0629	27.9311	27.7669	27.8143
Q2FXW1	Q2FXW1	SAOUHSC_01720	Putative Holliday junction resolvase	cellular macromolecule metabolic process;cellular metabolic process;cellular nitrogen compound metabolic process;cellular process;cellular response to stimulus;cellular response to stress;DNA metabolic process;DNA recombination;DNA repair;macromolecule metabolic process;metabolic process;nitrogen compound metabolic process;nucleic acid metabolic process;nucleobase-containing compound metabolic pr…	binding;catalytic activity;hydrolase activity;hydrolase activity, acting on ester bonds;nuclease activity;nucleic acid binding	cell part;cytoplasm;intracellular part		15.865	12	85.9	3482400000	112	+	1.81267	-0.253279	0.0147636	24.9936	24.9219	25.2349	25.0715	25.3623	25.2482	25.3749	25.2497
Q2FXW2	Q2FXW2	SAOUHSC_01719	UPF0473 protein SAOUHSC_01719					11.949	7	64.7	43983000000	371		0.720125	-0.203838	0.157776	28.3244	28.5505	28.4044	28.3212	28.7499	28.7868	28.6465	28.2327
Q2FXW3	Q2FXW3	SAOUHSC_01718			catalytic activity;methyltransferase activity;O-methyltransferase activity;transferase activity;transferase activity, transferring one-carbon groups			24.527	7	41	2002900000	92	+	1.26712	-0.38804	0.0436789	24.4328	24.9866	24.8808	24.6775	24.9131	25.2438	25.3752	24.9977
Q2FXW4	Q2FXW4	SAOUHSC_01717			catalytic activity;hydrolase activity;peptidase activity			35.958	10	38.4	4440700000	118	+	3.62399	-0.564217	0.000882353	25.2245	25.3251	25.1749	25.0796	25.621	25.8545	25.8199	25.7657
Q2FXW5	Q2FXW5	SAOUHSC_01716			catalytic activity;hydrolase activity;peptidase activity		Epithelial cell signaling in Helicobacter pylori infection	47.655	13	37.9	4767000000	201	+	3.15878	-0.658712	0.00199005	25.0453	24.9547	25.2677	25.0624	25.7381	25.5402	25.7597	25.927
Q2FXW6	Q2FXW6	udk	Uridine kinase	biosynthetic process;cellular biosynthetic process;cellular metabolic compound salvage;cellular metabolic process;cellular nitrogen compound biosynthetic process;cellular nitrogen compound metabolic process;cellular process;CTP biosynthetic process;CTP metabolic process;CTP salvage;heterocycle biosynthetic process;heterocycle metabolic process;metabolic process;nitrogen compound metabolic process…	adenyl nucleotide binding;adenyl ribonucleotide binding;ATP binding;binding;catalytic activity;kinase activity;nucleobase-containing compound kinase activity;nucleoside kinase activity;nucleotide binding;phosphotransferase activity, alcohol group as acceptor;purine nucleotide binding;purine ribonucleoside triphosphate binding;purine ribonucleotide binding;ribonucleotide binding;transferase activi…	cell part;cytoplasm;intracellular part	Drug metabolism - other enzymes;Pyrimidine metabolism	23.505	18	83.1	9533300000	308		0.434944	-0.056396	0.299224	25.8241	25.7702	25.9555	25.9325	25.8638	25.967	25.8644	26.0128
Q2FXW7	Q2FXW7	greA	Transcription elongation factor GreA	biological regulation;biosynthetic process;cellular biosynthetic process;cellular macromolecule biosynthetic process;cellular macromolecule metabolic process;cellular metabolic process;cellular nitrogen compound metabolic process;cellular process;macromolecule biosynthetic process;macromolecule metabolic process;metabolic process;nitrogen compound metabolic process;nucleic acid metabolic process;…	binding;DNA binding;nucleic acid binding			17.743	18	98.1	134970000000	667	+	2.80214	-0.402539	0.00325614	30.4137	30.385	30.3507	30.5538	30.6834	30.8501	30.9686	30.8113
Q2FXW8	Q2FXW8	SAOUHSC_01712						27.001	9	45.5	726180000	44		1.01508	-1.25403	0.0797221	21.0236	21.2675	21.6206	21.5046	21.2962	23.5162	21.8016	23.8184
Q2FXW9	Q2FXW9	SAOUHSC_01711						33.556	14	56.9	2966900000	60		0.317515	-0.530859	0.405755	25.1996	23.2929	25.6008	23.298	25.5823	24.6417	23.9994	25.2913
Q2FXX0	Q2FXX0	SAOUHSC_01710					Fatty acid biosynthesis;Propanoate metabolism;Pyruvate metabolism;Tetracycline biosynthesis	16.793	2	9.4	1050000000	27	+	1.84443	-1.76177	0.0136178	23.1377	23.203	22.8803	21.0647	24.4083	24.2641	24.5606	24.0998
Q2FXX1	Q2FXX1	SAOUHSC_01709			acetyl-CoA carboxylase activity;adenyl nucleotide binding;adenyl ribonucleotide binding;ATP binding;binding;biotin carboxylase activity;catalytic activity;cation binding;CoA carboxylase activity;ion binding;ligase activity;ligase activity, forming carbon-carbon bonds;ligase activity, forming carbon-nitrogen bonds;metal ion binding;nucleotide binding;purine nucleotide binding;purine ribonucleoside…		Carbon fixation pathways in prokaryotes;Fatty acid biosynthesis;Propanoate metabolism;Pyruvate metabolism;Tetracycline biosynthesis	50.224	14	49.4	1520700000	77	+	3.25897	-3.46601	0.00191398	20.0326	20.8759	20.8616	20.1801	23.757	24.7171	24.6366	22.7035
Q2FXX2	Q2FXX2	SAOUHSC_01708	UPF0271 protein SAOUHSC_01708	carbohydrate metabolic process;metabolic process;primary metabolic process	catalytic activity			27.448	6	38.4	397470000	32		0.625291	-0.769883	0.193946	21.418	20.7288	21.8731	20.3028	22.2632	21.8962	20.5319	22.7109
Q2FXX4	Q2FXX4	SAOUHSC_01706						47.684	12	28.6	1015000000	70		0.356461	-0.352482	0.362812	23.5948	22.516	22.9362	22.1433	23.3956	22.3974	23.7673	23.0398
Q2FXX8	Q2FXX8	mtnN	5'-methylthioadenosine/S-adenosylhomocysteine nucleosidase	amine biosynthetic process;amine metabolic process;amino acid salvage;aspartate family amino acid biosynthetic process;aspartate family amino acid metabolic process;biosynthetic process;carboxylic acid biosynthetic process;carboxylic acid metabolic process;catabolic process;cellular amine metabolic process;cellular amino acid biosynthetic process;cellular amino acid metabolic process;cellular bio…	adenosylhomocysteine nucleosidase activity;catalytic activity;hydrolase activity;hydrolase activity, acting on glycosyl bonds;hydrolase activity, hydrolyzing N-glycosyl compounds;methylthioadenosine nucleosidase activity;purine nucleosidase activity		Cysteine and methionine metabolism	24.534	15	71.5	19223000000	375	+	2.47751	0.247967	0.00586813	26.7722	26.6613	26.8564	26.7303	26.4437	26.4657	26.5929	26.5259
Q2FXX9	Q2FXX9	SAOUHSC_01701			catalytic activity;hydrolase activity			20.219	13	77.1	7562600000	284		0.0409401	0.0336471	0.887028	25.4952	25.4082	25.2926	25.8722	25.641	25.4411	24.8108	26.0406
Q2FXY0	Q2FXY0	SAOUHSC_01700			binding;catalytic activity;GTP binding;GTPase activity;guanyl nucleotide binding;guanyl ribonucleotide binding;hydrolase activity;hydrolase activity, acting on acid anhydrides;hydrolase activity, acting on acid anhydrides, in phosphorus-containing anhydrides;nucleoside-triphosphatase activity;nucleotide binding;purine nucleotide binding;purine ribonucleoside triphosphate binding;purine ribonucleo…			41.086	16	40.4	6541700000	340		1.14365	-0.287951	0.0580562	24.6527	24.8962	24.4903	24.4805	24.6671	25.0239	25.0647	24.9158
Q2FXY1	Q2FXY1	aroE	Shikimate dehydrogenase (NADP(+))	amine biosynthetic process;amine metabolic process;aromatic amino acid family biosynthetic process;aromatic amino acid family metabolic process;aromatic compound biosynthetic process;biosynthetic process;carboxylic acid biosynthetic process;carboxylic acid metabolic process;cellular amine metabolic process;cellular amino acid biosynthetic process;cellular amino acid metabolic process;cellular aro…	binding;catalytic activity;coenzyme binding;cofactor binding;NADP binding;nucleotide binding;oxidoreductase activity;oxidoreductase activity, acting on CH-OH group of donors;oxidoreductase activity, acting on the CH-OH group of donors, NAD or NADP as acceptor;shikimate 3-dehydrogenase (NADP+) activity		Phenylalanine, tyrosine and tryptophan biosynthesis	29.879	9	57.5	3022400000	112		0.041498	0.0153093	0.887154	24.7721	24.9025	24.6063	24.7672	24.5706	24.9061	24.9749	24.5352
Q2FXY2	Q2FXY2	SAOUHSC_01698			binding;nucleic acid binding;RNA binding			11.048	8	76	5942400000	133		0.0410356	-0.00966311	0.887347	25.7721	25.7011	25.8915	25.8092	25.7138	25.766	25.7178	26.0149
Q2FXY3	Q2FXY3	nadD	Probable nicotinate-nucleotide adenylyltransferase	biosynthetic process;cellular biosynthetic process;cellular metabolic process;cellular nitrogen compound biosynthetic process;cellular nitrogen compound metabolic process;cellular process;coenzyme biosynthetic process;coenzyme metabolic process;cofactor biosynthetic process;cofactor metabolic process;heterocycle biosynthetic process;heterocycle metabolic process;metabolic process;NAD biosynthetic…	adenyl nucleotide binding;adenyl ribonucleotide binding;adenylyltransferase activity;ATP binding;binding;catalytic activity;nicotinate-nucleotide adenylyltransferase activity;nucleotide binding;nucleotidyltransferase activity;purine nucleotide binding;purine ribonucleoside triphosphate binding;purine ribonucleotide binding;ribonucleotide binding;transferase activity;transferase activity, transfer…		Nicotinate and nicotinamide metabolism	22.127	4	25.9	698670000	34		0.228332	-0.137067	0.513303	23.3129	23.8675	23.2821	23.0616	23.3741	23.9722	23.5533	23.1727
Q2FXY5	Q2FXY5	SAOUHSC_01690		biosynthetic process;cellular biosynthetic process;cellular macromolecule biosynthetic process;cellular macromolecule metabolic process;cellular metabolic process;cellular nitrogen compound metabolic process;cellular process;DNA metabolic process;DNA replication;macromolecule biosynthetic process;macromolecule metabolic process;metabolic process;nitrogen compound metabolic process;nucleic acid me…	binding;catalytic activity;DNA binding;DNA polymerase activity;DNA-directed DNA polymerase activity;nucleic acid binding;nucleotidyltransferase activity;transferase activity;transferase activity, transferring phosphorus-containing groups	cell part;DNA polymerase complex;DNA polymerase III complex;intracellular part;macromolecular complex;protein complex	DNA replication;Homologous recombination;Mismatch repair;Purine metabolism;Pyrimidine metabolism	37.936	6	24.4	455780000	23		0.215572	0.206838	0.532777	22.3419	22.1066	21.971	22.2911	22.2623	22.0323	20.9218	22.667
Q2FXY6	Q2FXY6	rpsT	30S ribosomal protein S20	biosynthetic process;cellular biosynthetic process;cellular macromolecule biosynthetic process;cellular macromolecule metabolic process;cellular metabolic process;cellular process;cellular protein metabolic process;macromolecule biosynthetic process;macromolecule metabolic process;metabolic process;primary metabolic process;protein metabolic process;translation	binding;nucleic acid binding;RNA binding;rRNA binding;structural constituent of ribosome;structural molecule activity	cell part;cytoplasmic part;intracellular non-membrane-bounded organelle;intracellular organelle;intracellular part;macromolecular complex;non-membrane-bounded organelle;organelle;ribonucleoprotein complex;ribosome	Ribosome	9.0213	15	92.8	215580000000	677	+	2.54178	-0.453496	0.00544092	31.2049	31.1203	31.0895	31.2779	31.797	31.7035	31.4082	31.598
Q2FXY7	Q2FXY7	lepA	Elongation factor 4	biological regulation;positive regulation of biological process;positive regulation of biosynthetic process;positive regulation of cellular biosynthetic process;positive regulation of cellular metabolic process;positive regulation of cellular process;positive regulation of cellular protein metabolic process;positive regulation of macromolecule biosynthetic process;positive regulation of macromole…	binding;catalytic activity;GTP binding;GTPase activity;guanyl nucleotide binding;guanyl ribonucleotide binding;hydrolase activity;hydrolase activity, acting on acid anhydrides;hydrolase activity, acting on acid anhydrides, in phosphorus-containing anhydrides;nucleic acid binding;nucleoside-triphosphatase activity;nucleotide binding;purine nucleotide binding;purine ribonucleoside triphosphate bind…	cell part;membrane;plasma membrane		68.174	46	69.5	25959000000	794		0.833358	-0.0664396	0.123172	26.467	26.3947	26.4894	26.5082	26.5202	26.4595	26.5343	26.6112
Q2FXY9	Q2FXY9	SAOUHSC_01686		biosynthetic process;cellular biosynthetic process;cellular metabolic process;cellular nitrogen compound biosynthetic process;cellular nitrogen compound metabolic process;cellular process;cofactor biosynthetic process;cofactor metabolic process;heterocycle biosynthetic process;heterocycle metabolic process;metabolic process;nitrogen compound metabolic process;porphyrin-containing compound biosynt…	binding;catalytic activity;coproporphyrinogen oxidase activity;iron-sulfur cluster binding;metal cluster binding;oxidoreductase activity;oxidoreductase activity, acting on the CH-CH group of donors;oxidoreductase activity, acting on the CH-CH group of donors, oxygen as acceptor	cell part;cytoplasm;intracellular part	Porphyrin and chlorophyll metabolism	42.84	4	17.1	347770000	29		0.838421	-1.00185	0.121701	22.5769	23.3525	23.0576	20.812	23.1795	23.1926	23.9732	23.4609
Q2FXZ0	Q2FXZ0	hrcA	Heat-inducible transcription repressor HrcA	biological regulation;biosynthetic process;cellular biosynthetic process;cellular macromolecule biosynthetic process;cellular macromolecule metabolic process;cellular metabolic process;cellular nitrogen compound metabolic process;cellular process;macromolecule biosynthetic process;macromolecule metabolic process;metabolic process;negative regulation of biological process;negative regulation of bi…	binding;DNA binding;nucleic acid binding			37.015	7	33.8	188180000	9		0.087497	-0.0939283	0.76627	22.0847	21.41	21.8251	21.6962	22.6012	21.8995	22.0336	20.8574
Q2FXZ1	Q2FXZ1	grpE	Protein GrpE	cellular macromolecule metabolic process;cellular metabolic process;cellular process;cellular protein metabolic process;macromolecule metabolic process;metabolic process;primary metabolic process;protein folding;protein metabolic process	adenyl nucleotide binding;adenyl-nucleotide exchange factor activity;ATPase regulator activity;binding;enzyme regulator activity;nucleoside-triphosphatase regulator activity;nucleotide binding;purine nucleotide binding	cell part;cytoplasm;intracellular part		24.008	16	71.6	68822000000	461		0.870621	0.123354	0.112247	28.7659	28.6623	28.4991	28.5924	28.4682	28.5919	28.5644	28.4018
Q2FXZ2	Q2FXZ2	dnaK	Chaperone protein DnaK	cellular macromolecule metabolic process;cellular metabolic process;cellular process;cellular protein metabolic process;macromolecule metabolic process;metabolic process;primary metabolic process;protein folding;protein metabolic process	adenyl nucleotide binding;adenyl ribonucleotide binding;ATP binding;binding;nucleotide binding;purine nucleotide binding;purine ribonucleoside triphosphate binding;purine ribonucleotide binding;ribonucleotide binding		ko05152;RNA degradation	66.361	76	85.4	452630000000	2704	+	2.69139	0.346493	0.00374277	31.1035	30.9703	31.0357	31.0058	30.6233	30.7204	30.5536	30.8321
Q2FXZ3	Q2FXZ3	dnaJ	Chaperone protein DnaJ	biosynthetic process;cellular biosynthetic process;cellular macromolecule biosynthetic process;cellular macromolecule metabolic process;cellular metabolic process;cellular nitrogen compound metabolic process;cellular process;cellular protein metabolic process;DNA metabolic process;DNA replication;macromolecule biosynthetic process;macromolecule metabolic process;metabolic process;nitrogen compoun…	adenyl nucleotide binding;adenyl ribonucleotide binding;ATP binding;binding;cation binding;ion binding;metal ion binding;nucleotide binding;purine nucleotide binding;purine ribonucleoside triphosphate binding;purine ribonucleotide binding;ribonucleotide binding;transition metal ion binding;zinc ion binding	cell part;cytoplasm;intracellular part		41.76	9	32.2	3285800000	157		0.176761	0.058629	0.591368	24.8671	24.6514	25.0639	24.9408	24.7226	24.9972	24.602	24.9668
Q2FXZ4	Q2FXZ4	prmA	Ribosomal protein L11 methyltransferase		catalytic activity;methyltransferase activity;protein methyltransferase activity;transferase activity;transferase activity, transferring one-carbon groups	cell part;cytoplasm;intracellular part		35.513	9	29.8	8035400000	207		0.302288	-0.0597873	0.422435	27.0085	27.0027	26.9753	26.8033	26.9442	27.0585	27.1676	26.8586
Q2FXZ5	Q2FXZ5	SAOUHSC_01680	Ribosomal RNA small subunit methyltransferase E	cellular macromolecule metabolic process;cellular metabolic process;cellular nitrogen compound metabolic process;cellular process;macromolecule metabolic process;metabolic process;ncRNA metabolic process;ncRNA processing;nitrogen compound metabolic process;nucleic acid metabolic process;nucleobase-containing compound metabolic process;primary metabolic process;RNA metabolic process;RNA processing…	catalytic activity;methyltransferase activity;transferase activity;transferase activity, transferring one-carbon groups	cell part;cytoplasm;intracellular part		28.469	4	22	2682400000	50		0.0303747	-0.00677443	0.914755	26.0097	26.0187	25.9142	25.9883	25.7905	25.9827	26.1308	26.054
Q2FXZ6	Q2FXZ6	SAOUHSC_01679		cellular macromolecule metabolic process;cellular metabolic process;cellular nitrogen compound metabolic process;cellular process;macromolecule metabolic process;macromolecule modification;metabolic process;nitrogen compound metabolic process;nucleic acid metabolic process;nucleobase-containing compound metabolic process;primary metabolic process;RNA metabolic process;RNA modification	4 iron, 4 sulfur cluster binding;binding;catalytic activity;iron-sulfur cluster binding;metal cluster binding;transferase activity			50.955	28	60.7	10622000000	463	+	2.5549	-0.475713	0.00534111	25.5724	25.5315	25.6311	25.6503	25.9617	26.0129	25.9626	26.351
Q2FXZ7	Q2FXZ7	rpsU	30S ribosomal protein S21	biosynthetic process;cellular biosynthetic process;cellular macromolecule biosynthetic process;cellular macromolecule metabolic process;cellular metabolic process;cellular process;cellular protein metabolic process;macromolecule biosynthetic process;macromolecule metabolic process;metabolic process;primary metabolic process;protein metabolic process;translation	structural constituent of ribosome;structural molecule activity	cell part;cytoplasmic part;intracellular non-membrane-bounded organelle;intracellular organelle;intracellular part;macromolecular complex;non-membrane-bounded organelle;organelle;ribonucleoprotein complex;ribosome	Ribosome	6.9721	13	69	80827000000	432		0.771368	-0.246623	0.13937	29.6376	29.6362	29.5232	29.8731	30.0992	29.9268	29.5151	30.1155
Q2FXZ8	Q2FXZ8	SAOUHSC_01677						25.002	7	26.9	1042900000	36		0.416055	0.402187	0.311664	23.8306	23.7777	24.4054	23.8956	24.2945	23.8559	22.423	23.7272
Q2FXZ9	Q2FXZ9	SAOUHSC_01676	UPF0365 protein SAOUHSC_01676			cell part;integral to membrane;intrinsic to membrane;membrane;membrane part;plasma membrane		35.181	46	82.7	307840000000	1932		0.389387	-0.0396705	0.332168	29.7143	29.8309	29.6915	29.8043	29.8471	29.8531	29.7502	29.7493
Q2FY00	Q2FY00	SAOUHSC_01675						27.256	17	61.2	9469700000	309		0.443458	0.0809975	0.293819	25.3396	25.5078	25.2624	25.4008	25.3187	25.4261	25.1226	25.3191
Q2FY01	Q2FY01	SAOUHSC_01673			adenyl nucleotide binding;adenyl ribonucleotide binding;ATP binding;binding;nucleic acid binding;nucleotide binding;purine nucleotide binding;purine ribonucleoside triphosphate binding;purine ribonucleotide binding;ribonucleotide binding;RNA binding			34.913	32	88.9	35092000000	735		0.414399	0.10435	0.313138	27.4772	27.7212	27.5041	27.2975	27.3983	27.5738	27.2331	27.3776
Q2FY02	Q2FY02	ybeY	Endoribonuclease YbeY	cellular macromolecule metabolic process;cellular metabolic process;cellular nitrogen compound metabolic process;cellular process;macromolecule metabolic process;metabolic process;ncRNA metabolic process;ncRNA processing;nitrogen compound metabolic process;nucleic acid metabolic process;nucleobase-containing compound metabolic process;primary metabolic process;RNA metabolic process;RNA processing…	binding;catalytic activity;cation binding;endonuclease activity;endopeptidase activity;endoribonuclease activity;hydrolase activity;hydrolase activity, acting on ester bonds;ion binding;metal ion binding;metalloendopeptidase activity;metallopeptidase activity;nuclease activity;peptidase activity;peptidase activity, acting on L-amino acid peptides;ribonuclease activity;transition metal ion binding…	cell part;cytoplasm;intracellular part		17.952	6	39.4	1163700000	52		0.963531	0.298413	0.090348	23.6495	24.1534	24.1376	23.7214	23.4805	23.7306	23.795	23.4623
Q2FY04	Q2FY04	SAOUHSC_01670			binding;catalytic activity;cation binding;cytidine deaminase activity;deaminase activity;hydrolase activity;hydrolase activity, acting on carbon-nitrogen (but not peptide) bonds;hydrolase activity, acting on carbon-nitrogen (but not peptide) bonds, in cyclic amidines;ion binding;metal ion binding;transition metal ion binding;zinc ion binding		Drug metabolism - other enzymes;Pyrimidine metabolism	14.964	9	41.8	2518400000	198		0.0687125	-0.0261188	0.813557	23.9295	23.7196	23.472	23.8151	23.4897	23.9051	23.8735	23.7723
Q2FY06	Q2FY06	era	GTPase Era	cellular component biogenesis;cellular component biogenesis at cellular level;cellular component organization or biogenesis;cellular component organization or biogenesis at cellular level;cellular process;ribonucleoprotein complex biogenesis;ribosomal small subunit biogenesis	binding;catalytic activity;GTP binding;GTPase activity;guanyl nucleotide binding;guanyl ribonucleotide binding;hydrolase activity;hydrolase activity, acting on acid anhydrides;hydrolase activity, acting on acid anhydrides, in phosphorus-containing anhydrides;nucleic acid binding;nucleoside-triphosphatase activity;nucleotide binding;purine nucleotide binding;purine ribonucleoside triphosphate bind…	cell part;cytoplasm;intracellular part;membrane;plasma membrane		34.27	32	78.3	31267000000	559		0.85034	0.116383	0.117661	26.4969	26.4316	26.3558	26.5816	26.2824	26.43	26.2493	26.4387
Q2FY08	Q2FY08	glyQS	Glycine--tRNA ligase	amine metabolic process;amino acid activation;carboxylic acid metabolic process;cellular amine metabolic process;cellular amino acid metabolic process;cellular ketone metabolic process;cellular macromolecule metabolic process;cellular metabolic process;cellular nitrogen compound metabolic process;cellular process;glycyl-tRNA aminoacylation;macromolecule metabolic process;metabolic process;ncRNA m…	adenyl nucleotide binding;adenyl ribonucleotide binding;aminoacyl-tRNA ligase activity;ATP binding;binding;catalytic activity;glycine-tRNA ligase activity;ligase activity;ligase activity, forming aminoacyl-tRNA and related compounds;ligase activity, forming carbon-oxygen bonds;nucleotide binding;protein binding;protein dimerization activity;purine nucleotide binding;purine ribonucleoside triphosp…	cell part;cytoplasm;intracellular part	Aminoacyl-tRNA biosynthesis	53.62	50	78.6	194120000000	1735		0.281901	0.0356226	0.444668	29.0119	29.0364	29.0916	29.042	28.926	28.9363	29.0393	29.1378
Q2FY09	Q2FY09	SAOUHSC_01665						20.56	10	55.3	6129000000	165		0.0731361	-0.020997	0.801929	24.7451	24.89	25.0044	24.5914	24.7402	24.8135	24.9738	24.7874
Q2FY10	Q2FY10	SAOUHSC_01664	Putative pyruvate, phosphate dikinase regulatory protein	cellular macromolecule metabolic process;cellular metabolic process;cellular process;cellular protein metabolic process;dephosphorylation;macromolecule metabolic process;macromolecule modification;metabolic process;phosphate-containing compound metabolic process;phosphorus metabolic process;primary metabolic process;protein dephosphorylation;protein metabolic process;protein modification process	adenyl nucleotide binding;adenyl ribonucleotide binding;ADP binding;ATP binding;binding;catalytic activity;kinase activity;nucleotide binding;phosphotransferase activity, alcohol group as acceptor;phosphotransferase activity, phosphate group as acceptor;protein kinase activity;protein serine/threonine kinase activity;purine nucleotide binding;purine ribonucleoside triphosphate binding;purine ribo…			30.784	31	85.7	21159000000	696	+	1.43866	0.137969	0.029977	26.247	26.0649	26.1429	26.2204	25.9889	25.9699	26.1015	26.0631
Q2FY11	Q2FY11	dnaG	DNA primase		adenyl nucleotide binding;adenyl ribonucleotide binding;ATP binding;binding;catalytic activity;cation binding;DNA binding;DNA helicase activity;DNA primase activity;DNA-directed RNA polymerase activity;helicase activity;hydrolase activity;hydrolase activity, acting on acid anhydrides;hydrolase activity, acting on acid anhydrides, in phosphorus-containing anhydrides;ion binding;magnesium ion bindi…		DNA replication	69.293	16	30.1	1275600000	106		0.430787	-0.393457	0.302355	23.0839	22.8326	23.2585	21.8877	23.3695	23.4269	23.4844	22.3559
Q2FY13	Q2FY13	SAOUHSC_01661			catalytic activity;methyltransferase activity;RNA methyltransferase activity;S-adenosylmethionine-dependent methyltransferase activity;transferase activity;transferase activity, transferring one-carbon groups;tRNA (adenine) methyltransferase activity;tRNA (adenine-N1-)-methyltransferase activity;tRNA methyltransferase activity			25.508	13	45.3	4465300000	147	+	2.73256	-0.599411	0.00338158	24.9587	25.0016	25.126	25.161	25.5155	25.4693	25.7561	25.9039
Q2FY14	Q2FY14	SAOUHSC_01660	Putative GTP cyclohydrolase 1 type 2	7,8-dihydroneopterin 3'-triphosphate biosynthetic process;aromatic compound biosynthetic process;biosynthetic process;cellular aromatic compound metabolic process;cellular biosynthetic process;cellular metabolic process;cellular nitrogen compound biosynthetic process;cellular nitrogen compound metabolic process;cellular process;cofactor biosynthetic process;cofactor metabolic process;heterocycle …	binding;catalytic activity;cation binding;cyclohydrolase activity;GTP binding;GTP cyclohydrolase activity;GTP cyclohydrolase I activity;guanyl nucleotide binding;guanyl ribonucleotide binding;hydrolase activity;hydrolase activity, acting on carbon-nitrogen (but not peptide) bonds;hydrolase activity, acting on carbon-nitrogen (but not peptide) bonds, in cyclic amidines;ion binding;metal ion bindin…			41.152	10	41	2200500000	172		0.850375	-0.21199	0.117734	24.2471	24.2743	23.8489	24.033	24.16	24.2104	24.4095	24.4713
Q2FY15	Q2FY15	cshB	DEAD-box ATP-dependent RNA helicase CshB	catabolic process;cellular catabolic process;cellular macromolecule catabolic process;cellular macromolecule metabolic process;cellular metabolic process;cellular nitrogen compound metabolic process;cellular process;macromolecule catabolic process;macromolecule metabolic process;metabolic process;nitrogen compound metabolic process;nucleic acid metabolic process;nucleobase-containing compound met…	adenyl nucleotide binding;adenyl ribonucleotide binding;ATP binding;ATPase activity;ATPase activity, coupled;ATP-dependent helicase activity;ATP-dependent RNA helicase activity;binding;catalytic activity;helicase activity;hydrolase activity;hydrolase activity, acting on acid anhydrides;hydrolase activity, acting on acid anhydrides, in phosphorus-containing anhydrides;nucleic acid binding;nucleosi…	cell part;cytoplasm;intracellular part		51.08	29	61.2	26926000000	604		0.230984	0.0659342	0.510316	27.5181	27.4229	27.4029	27.5685	27.4028	27.5222	27.1137	27.6101
Q2FY16	Q2FY16	nfo	Probable endonuclease 4	cellular macromolecule metabolic process;cellular metabolic process;cellular nitrogen compound metabolic process;cellular process;cellular response to stimulus;cellular response to stress;DNA metabolic process;DNA repair;macromolecule metabolic process;metabolic process;nitrogen compound metabolic process;nucleic acid metabolic process;nucleobase-containing compound metabolic process;primary meta…	binding;catalytic activity;cation binding;deoxyribonuclease activity;deoxyribonuclease IV (phage-T4-induced) activity;DNA binding;endodeoxyribonuclease activity;endodeoxyribonuclease activity, producing 5'-phosphomonoesters;endonuclease activity;endonuclease activity, active with either ribo- or deoxyribonucleic acids and producing 5'-phosphomonoesters;hydrolase activity;hydrolase activity, actin…		Base excision repair	33.158	23	72.6	22160000000	492	+	2.21945	-0.270395	0.00757078	26.6621	26.6625	26.6126	26.824	26.843	27.052	27.0128	26.9349
Q2FY17	Q2FY17	SAOUHSC_01657			adenyl nucleotide binding;adenyl ribonucleotide binding;ATP binding;ATPase activity;binding;catalytic activity;hydrolase activity;hydrolase activity, acting on acid anhydrides;hydrolase activity, acting on acid anhydrides, in phosphorus-containing anhydrides;nucleoside-triphosphatase activity;nucleotide binding;purine nucleotide binding;purine ribonucleoside triphosphate binding;purine ribonucleo…		ABC transporters	29.171	9	33	853220000	48	+	1.23583	0.802795	0.0474611	23.752	24.2604	24.0103	23.8659	22.8537	22.4302	23.51	23.8834
Q2FY19	Q2FY19	fur	Ferric uptake regulation protein	biosynthetic process;cellular biosynthetic process;cellular macromolecule biosynthetic process;cellular macromolecule metabolic process;cellular metabolic process;cellular nitrogen compound metabolic process;cellular process;macromolecule biosynthetic process;macromolecule metabolic process;metabolic process;nitrogen compound metabolic process;nucleic acid metabolic process;nucleobase-containing …	binding;cation binding;DNA binding;ion binding;metal ion binding;nucleic acid binding;nucleic acid binding transcription factor activity;sequence-specific DNA binding transcription factor activity	cell part;cytoplasm;intracellular part		15.922	6	58.8	1779100000	144		0.14236	0.0656743	0.653995	24.3452	24.5367	24.2466	24.4748	24.257	24.1231	24.1456	24.8148
Q2FY21	Q2FY21	SAOUHSC_01652			binding;carboxylic acid binding;drug binding;penicillin binding		Peptidoglycan biosynthesis	77.237	44	67.4	11155000000	733		0.22574	0.0296888	0.516741	24.8752	24.6364	24.7586	24.7309	24.7077	24.7539	24.6715	24.7493
Q2FY22	Q2FY22	rpmG2	50S ribosomal protein L33 2	biosynthetic process;cellular biosynthetic process;cellular macromolecule biosynthetic process;cellular macromolecule metabolic process;cellular metabolic process;cellular process;cellular protein metabolic process;macromolecule biosynthetic process;macromolecule metabolic process;metabolic process;primary metabolic process;protein metabolic process;translation	structural constituent of ribosome;structural molecule activity	cell part;cytoplasmic part;intracellular non-membrane-bounded organelle;intracellular organelle;intracellular part;macromolecular complex;non-membrane-bounded organelle;organelle;ribonucleoprotein complex;ribosome	Ribosome	5.8727	2	63.3	8913500000	26		1.11143	-1.3534	0.0615542	27.0779	27.0893	27.657	24.9526	28.4264	28.4025	27.8377	27.5237
Q2FY24	Q2FY24	SAOUHSC_01649			catalytic activity;endopeptidase activity;hydrolase activity;peptidase activity;peptidase activity, acting on L-amino acid peptides;serine hydrolase activity;serine-type endopeptidase activity;serine-type peptidase activity	cell part;integral to membrane;intrinsic to membrane;membrane part		39.398	18	42.6	4156200000	203		1.14793	-0.314414	0.0572958	23.4599	23.35	23.4264	23.5443	23.9674	23.8288	23.3549	23.8872
Q2FY25	Q2FY25	SAOUHSC_01648						17.385	5	53.3	770210000	35		0.584896	-0.238842	0.210626	23.5356	23.0135	23.3147	23.0728	23.1337	23.3385	23.5976	23.8221
Q2FY27	Q2FY27	SAOUHSC_01646		alcohol catabolic process;alcohol metabolic process;carbohydrate catabolic process;carbohydrate metabolic process;catabolic process;cellular carbohydrate catabolic process;cellular carbohydrate metabolic process;cellular metabolic process;cellular process;generation of precursor metabolites and energy;glucose catabolic process;glucose metabolic process;glycolysis;hexose catabolic process;hexose m…	carbohydrate kinase activity;catalytic activity;glucokinase activity;hexokinase activity;kinase activity;phosphotransferase activity, alcohol group as acceptor;transferase activity;transferase activity, transferring phosphorus-containing groups	cell part;cytoplasm;intracellular part	Amino sugar and nucleotide sugar metabolism;Butirosin and neomycin biosynthesis;Galactose metabolism;Glycolysis / Gluconeogenesis;Starch and sucrose metabolism;Streptomycin biosynthesis	35.077	16	49.7	31708000000	486	+	2.01191	0.372077	0.010449	27.3245	27.1104	27.2826	27.3734	26.7701	26.8182	26.8775	27.1367
Q2FY28	Q2FY28	SAOUHSC_01645						12.282	15	95.4	14460000000	403		0.712126	0.0858378	0.160458	25.8771	25.8597	25.712	25.846	25.631	25.6963	25.8058	25.8183
Q2FY29	Q2FY29	SAOUHSC_01644						23.141	3	13	463710000	6		0.253863	-0.311712	0.477246	22.4908	20.3276	21.4126	22.3064	22.0467	22.1235	21.8043	21.8098
Q2FY32	Q2FY32	aroK	Shikimate kinase	amine biosynthetic process;amine metabolic process;aromatic amino acid family biosynthetic process;aromatic amino acid family metabolic process;aromatic compound biosynthetic process;biosynthetic process;carboxylic acid biosynthetic process;carboxylic acid metabolic process;cellular amine metabolic process;cellular amino acid biosynthetic process;cellular amino acid metabolic process;cellular aro…	adenyl nucleotide binding;adenyl ribonucleotide binding;ATP binding;binding;catalytic activity;cation binding;ion binding;kinase activity;magnesium ion binding;metal ion binding;nucleotide binding;phosphotransferase activity, alcohol group as acceptor;purine nucleotide binding;purine ribonucleoside triphosphate binding;purine ribonucleotide binding;ribonucleotide binding;shikimate kinase activity…	cell part;cytoplasm;intracellular part	Phenylalanine, tyrosine and tryptophan biosynthesis	20.222	5	29.3	518770000	43		0.338774	0.246239	0.381485	22.0447	21.2466	22.2723	22.1023	22.1125	21.6991	21.0989	21.7704
Q2FY33	Q2FY33	gcvT	Aminomethyltransferase	amine catabolic process;amine metabolic process;carboxylic acid catabolic process;carboxylic acid metabolic process;catabolic process;cellular amine metabolic process;cellular amino acid catabolic process;cellular amino acid metabolic process;cellular catabolic process;cellular ketone metabolic process;cellular metabolic process;cellular nitrogen compound metabolic process;cellular process;glycin…	aminomethyltransferase activity;catalytic activity;methyltransferase activity;transaminase activity;transferase activity;transferase activity, transferring nitrogenous groups;transferase activity, transferring one-carbon groups		Glycine, serine and threonine metabolism;Nitrogen metabolism;One carbon pool by folate	40.457	37	82.4	93775000000	1092	+	2.04254	0.340232	0.0098711	28.4354	28.5732	28.5648	28.3708	28.282	27.9387	28.2205	28.142
Q2FY34	Q2FY34	gcvPA	Probable glycine dehydrogenase (decarboxylating) subunit 1	amine catabolic process;amine metabolic process;carboxylic acid catabolic process;carboxylic acid metabolic process;catabolic process;cellular amine metabolic process;cellular amino acid catabolic process;cellular amino acid metabolic process;cellular catabolic process;cellular ketone metabolic process;cellular metabolic process;cellular nitrogen compound metabolic process;cellular process;glycin…	binding;catalytic activity;cofactor binding;glycine dehydrogenase (decarboxylating) activity;oxidoreductase activity;oxidoreductase activity, acting on the CH-NH2 group of donors;oxidoreductase activity, acting on the CH-NH2 group of donors, disulfide as acceptor;pyridoxal phosphate binding;vitamin B6 binding;vitamin binding		Glycine, serine and threonine metabolism	49.716	29	65	109040000000	947	+	2.46635	0.217613	0.00587097	28.9963	29.0033	28.9504	28.902	28.8586	28.6706	28.7148	28.7374
Q2FY35	Q2FY35	gcvPB	Probable glycine dehydrogenase (decarboxylating) subunit 2	amine catabolic process;amine metabolic process;carboxylic acid catabolic process;carboxylic acid metabolic process;catabolic process;cellular amine metabolic process;cellular amino acid catabolic process;cellular amino acid metabolic process;cellular catabolic process;cellular ketone metabolic process;cellular metabolic process;cellular nitrogen compound metabolic process;cellular process;glycin…	binding;catalytic activity;cofactor binding;glycine dehydrogenase (decarboxylating) activity;oxidoreductase activity;oxidoreductase activity, acting on the CH-NH2 group of donors;oxidoreductase activity, acting on the CH-NH2 group of donors, disulfide as acceptor;pyridoxal phosphate binding;vitamin B6 binding;vitamin binding		Glycine, serine and threonine metabolism	54.781	44	77.3	75134000000	1192	+	3.50311	0.380168	0.00148344	27.8397	27.9679	28.031	27.9148	27.6346	27.4801	27.5542	27.5639
Q2FY36	Q2FY36	SAOUHSC_01630						14.803	20	71.9	25907000000	554		0.273231	-0.0576777	0.454828	27.1533	27.1689	27.1315	27.4058	27.2684	27.2836	27.1246	27.4139
Q2FY37	Q2FY37	lipM	Octanoyltransferase LipM	biosynthetic process;carboxylic acid biosynthetic process;carboxylic acid metabolic process;cellular biosynthetic process;cellular ketone metabolic process;cellular lipid metabolic process;cellular macromolecule metabolic process;cellular metabolic process;cellular process;cellular protein metabolic process;coenzyme biosynthetic process;coenzyme metabolic process;cofactor biosynthetic process;cof…	catalytic activity;lipoyl(octanoyl) transferase activity;octanoyltransferase activity;transferase activity;transferase activity, transferring acyl groups;transferase activity, transferring acyl groups other than amino-acyl groups		Lipoic acid metabolism	31.881	25	86.6	17524000000	484	+	1.8554	0.287774	0.0137196	26.7107	26.553	26.7939	26.696	26.4396	26.227	26.3853	26.5506
Q2FY39	Q2FY39	SAOUHSC_01627						21.472	7	46.6	2506600000	93	+	1.97666	0.423913	0.0112286	25.6406	25.3309	25.7499	25.5998	25.1425	24.9637	25.2	25.3194
Q2FY40	Q2FY40	SAOUHSC_01626			binding;catalytic activity;cation binding;dipeptidase activity;exopeptidase activity;hydrolase activity;ion binding;metal ion binding;peptidase activity;peptidase activity, acting on L-amino acid peptides			39.337	51	87.3	89750000000	1312	+	4.94326	0.591362	0	28.6825	28.6487	28.6243	28.6223	28.0167	27.9545	28.0942	28.1469
Q2FY41	Q2FY41	efp	Elongation factor P	biosynthetic process;cellular biosynthetic process;cellular metabolic process;cellular process;metabolic process;peptide biosynthetic process;peptide metabolic process	binding;nucleic acid binding;RNA binding;translation elongation factor activity;translation factor activity, nucleic acid binding	cell part;cytoplasm;intracellular part		20.554	16	87.6	90874000000	530	+	1.96626	-0.235146	0.01114	28.5669	28.4275	28.3841	28.6118	28.684	28.6867	28.8321	28.7282
Q2FY42	Q2FY42	SAOUHSC_01624		biosynthetic process;carboxylic acid biosynthetic process;carboxylic acid metabolic process;cellular biosynthetic process;cellular ketone metabolic process;cellular lipid metabolic process;cellular metabolic process;cellular process;fatty acid biosynthetic process;fatty acid metabolic process;lipid biosynthetic process;lipid metabolic process;metabolic process;monocarboxylic acid metabolic proces…	acetyl-CoA carboxylase activity;catalytic activity;CoA carboxylase activity;ligase activity;ligase activity, forming carbon-carbon bonds	acetyl-CoA carboxylase complex;cell part;cytoplasmic part;intracellular part;macromolecular complex;protein complex	Fatty acid biosynthesis;Propanoate metabolism;Pyruvate metabolism;Tetracycline biosynthesis	17.121	4	18.8	1166700000	51		0.458107	-0.247047	0.283428	24.1818	24.3408	24.2295	23.8379	24.5914	24.9061	23.9533	24.1274
Q2FY43	Q2FY43	SAOUHSC_01623			acetyl-CoA carboxylase activity;adenyl nucleotide binding;adenyl ribonucleotide binding;ATP binding;binding;biotin carboxylase activity;catalytic activity;cation binding;CoA carboxylase activity;ion binding;ligase activity;ligase activity, forming carbon-carbon bonds;ligase activity, forming carbon-nitrogen bonds;metal ion binding;nucleotide binding;purine nucleotide binding;purine ribonucleoside…		Carbon fixation pathways in prokaryotes;Fatty acid biosynthesis;Propanoate metabolism;Pyruvate metabolism;Tetracycline biosynthesis	50.049	30	76.9	31317000000	782		0.705017	-0.0667334	0.164296	26.9354	26.9008	26.9344	26.9908	26.9634	26.967	26.9646	27.1333
Q2FY44	Q2FY44	SAOUHSC_01622						13.273	13	79.2	22675000000	280	+	1.71512	0.499201	0.0165	27.505	27.7103	27.7604	27.161	26.9784	26.9964	27.2637	26.9014
Q2FY45	Q2FY45	nusB	N utilization substance protein B homolog	biological regulation;biosynthetic process;cellular biosynthetic process;cellular macromolecule metabolic process;cellular metabolic process;cellular nitrogen compound metabolic process;cellular process;macromolecule metabolic process;metabolic process;nitrogen compound metabolic process;nucleic acid metabolic process;nucleobase-containing compound metabolic process;primary metabolic process;regu…	binding;nucleic acid binding;RNA binding			15.061	6	42.6	3631400000	132		0.449648	0.105083	0.289286	25.3672	24.938	25.1238	25.192	25.0339	24.9727	25.2131	24.9811
Q2FY46	Q2FY46	xseA	Exodeoxyribonuclease 7 large subunit	catabolic process;cellular catabolic process;cellular macromolecule catabolic process;cellular macromolecule metabolic process;cellular metabolic process;cellular nitrogen compound metabolic process;cellular process;DNA catabolic process;DNA metabolic process;macromolecule catabolic process;macromolecule metabolic process;metabolic process;nitrogen compound metabolic process;nucleic acid metaboli…	binding;catalytic activity;deoxyribonuclease activity;exodeoxyribonuclease activity;exodeoxyribonuclease activity, producing 5'-phosphomonoesters;exodeoxyribonuclease VII activity;exonuclease activity;exonuclease activity, active with either ribo- or deoxyribonucleic acids and producing 5'-phosphomonoesters;hydrolase activity;hydrolase activity, acting on ester bonds;nuclease activity;nucleic aci…	cell part;cytoplasm;exodeoxyribonuclease VII complex;intracellular part;macromolecular complex;protein complex	Mismatch repair	50.894	20	55.5	4117700000	218		0.628508	0.117897	0.192288	24.5	24.6146	24.7217	24.4631	24.4385	24.5182	24.2781	24.5931
Q2FY47	Q2FY47	xseB	Exodeoxyribonuclease 7 small subunit	catabolic process;cellular catabolic process;cellular macromolecule catabolic process;cellular macromolecule metabolic process;cellular metabolic process;cellular nitrogen compound metabolic process;cellular process;DNA catabolic process;DNA metabolic process;macromolecule catabolic process;macromolecule metabolic process;metabolic process;nitrogen compound metabolic process;nucleic acid metaboli…	catalytic activity;deoxyribonuclease activity;exodeoxyribonuclease activity;exodeoxyribonuclease activity, producing 5'-phosphomonoesters;exodeoxyribonuclease VII activity;exonuclease activity;exonuclease activity, active with either ribo- or deoxyribonucleic acids and producing 5'-phosphomonoesters;hydrolase activity;hydrolase activity, acting on ester bonds;nuclease activity	cell part;cytoplasm;exodeoxyribonuclease VII complex;intracellular part;macromolecular complex;protein complex	Mismatch repair	8.7596	2	48.7	655130000	41		0.140715	-0.0997233	0.656941	24.0325	23.7823	24.8044	24.1297	24.6638	24.1331	23.9482	24.4026
Q2FY48	Q2FY48	SAOUHSC_01618		biosynthetic process;cellular biosynthetic process;cellular lipid metabolic process;cellular metabolic process;cellular process;isoprenoid biosynthetic process;isoprenoid metabolic process;lipid biosynthetic process;lipid metabolic process;metabolic process;primary metabolic process	catalytic activity;geranyltranstransferase activity;prenyltransferase activity;transferase activity;transferase activity, transferring alkyl or aryl (other than methyl) groups		Terpenoid backbone biosynthesis	32.808	15	75.4	8219100000	239		0.307737	-0.0582929	0.417065	25.6354	25.7257	25.7053	25.481	25.646	25.8045	25.7728	25.5572
Q2FY49	Q2FY49	argR	Arginine repressor	amine biosynthetic process;amine metabolic process;arginine biosynthetic process;arginine metabolic process;biosynthetic process;carboxylic acid biosynthetic process;carboxylic acid metabolic process;cellular amine metabolic process;cellular amino acid biosynthetic process;cellular amino acid metabolic process;cellular biosynthetic process;cellular component assembly;cellular component organizati…	amine binding;amino acid binding;arginine binding;binding;carboxylic acid binding;DNA binding;nucleic acid binding;nucleic acid binding transcription factor activity;sequence-specific DNA binding transcription factor activity	cell part;cytoplasm;intracellular part		17.097	18	63.3	19501000000	479		0.880379	0.179935	0.109863	27.1932	27.1157	27.3562	27.1238	27.2448	26.8264	26.9718	27.026
Q2FY50	Q2FY50	SAOUHSC_01615	DNA repair protein RecN	cellular macromolecule metabolic process;cellular metabolic process;cellular nitrogen compound metabolic process;cellular process;cellular response to stimulus;cellular response to stress;DNA metabolic process;DNA recombination;DNA repair;macromolecule metabolic process;metabolic process;nitrogen compound metabolic process;nucleic acid metabolic process;nucleobase-containing compound metabolic pr…	adenyl nucleotide binding;adenyl ribonucleotide binding;ATP binding;binding;nucleotide binding;purine nucleotide binding;purine ribonucleoside triphosphate binding;purine ribonucleotide binding;ribonucleotide binding			64.321	35	65.5	19487000000	778		0.991605	0.179978	0.0851942	25.6401	25.7233	25.8952	25.7825	25.4693	25.4309	25.6842	25.7368
Q2FY51	Q2FY51	SAOUHSC_01614	Dihydrolipoyl dehydrogenase	biological regulation;cell redox homeostasis;cellular homeostasis;cellular process;homeostatic process;regulation of biological process;regulation of biological quality;regulation of cellular process	binding;catalytic activity;coenzyme binding;cofactor binding;dihydrolipoyl dehydrogenase activity;flavin adenine dinucleotide binding;oxidoreductase activity;oxidoreductase activity, acting on a sulfur group of donors;oxidoreductase activity, acting on a sulfur group of donors, NAD or NADP as acceptor;oxidoreductase activity, acting on NADH or NADPH		Citrate cycle (TCA cycle);Glycine, serine and threonine metabolism;Glycolysis / Gluconeogenesis;Pyruvate metabolism;Valine, leucine and isoleucine degradation	51.111	16	35.3	6105600000	221	+	1.49939	-0.168625	0.0268826	25.5118	25.3985	25.469	25.5207	25.5121	25.6217	25.7704	25.6703
Q2FY52	Q2FY52	SAOUHSC_01613			3-methyl-2-oxobutanoate dehydrogenase (2-methylpropanoyl-transferring) activity;catalytic activity;oxidoreductase activity;oxidoreductase activity, acting on the aldehyde or oxo group of donors;oxidoreductase activity, acting on the aldehyde or oxo group of donors, disulfide as acceptor		Valine, leucine and isoleucine degradation	36.229	28	78.2	19499000000	612		0.861386	-0.0831332	0.114971	26.2196	26.2015	26.2005	26.255	26.2806	26.32	26.1912	26.4172
Q2FY53	Q2FY53	SAOUHSC_01612			catalytic activity;oxidoreductase activity;oxidoreductase activity, acting on the aldehyde or oxo group of donors;oxidoreductase activity, acting on the aldehyde or oxo group of donors, disulfide as acceptor;pyruvate dehydrogenase (acetyl-transferring) activity;pyruvate dehydrogenase activity		Valine, leucine and isoleucine degradation	36.061	22	74.6	37420000000	760		0.172846	0.0253477	0.59803	28.0174	27.8653	28.0357	28.0483	27.9135	27.9407	27.933	28.0783
Q2FY54	Q2FY54	SAOUHSC_01611			catalytic activity;dihydrolipoyllysine-residue (2-methylpropanoyl)transferase activity;transferase activity;transferase activity, transferring acyl groups;transferase activity, transferring acyl groups other than amino-acyl groups		Valine, leucine and isoleucine degradation	46.725	29	59.7	18069000000	627		0.115331	-0.0217009	0.709139	25.9753	25.8953	26.1798	26.1567	26.0583	26.0683	26.0681	26.0992
Q2FY55	Q2FY55	SAOUHSC_01610	UPF0403 protein SAOUHSC_01610					16.221	9	55.2	7105700000	258	+	2.39519	0.435435	0.00612245	25.4902	25.4645	25.7872	25.6489	25.0613	25.0793	25.1848	25.3236
Q2FY59	Q2FY59	SAOUHSC_01606			aminopeptidase activity;catalytic activity;exopeptidase activity;hydrolase activity;metallopeptidase activity;peptidase activity;peptidase activity, acting on L-amino acid peptides			40.259	24	60.5	17805000000	585		0.892113	0.264428	0.106155	26.6085	26.5407	26.5793	26.3572	26.4883	26.0981	26.4947	25.9469
Q2FY60	Q2FY60	SAOUHSC_01605	6-phosphogluconate dehydrogenase, decarboxylating	alcohol catabolic process;alcohol metabolic process;aldonic acid metabolic process;carbohydrate catabolic process;carbohydrate metabolic process;carboxylic acid metabolic process;catabolic process;cellular carbohydrate catabolic process;cellular carbohydrate metabolic process;cellular ketone metabolic process;cellular metabolic process;cellular nitrogen compound metabolic process;cellular process…	binding;catalytic activity;coenzyme binding;cofactor binding;NADP binding;nucleotide binding;oxidoreductase activity;oxidoreductase activity, acting on CH-OH group of donors;oxidoreductase activity, acting on the CH-OH group of donors, NAD or NADP as acceptor;phosphogluconate dehydrogenase (decarboxylating) activity		Glutathione metabolism;Pentose phosphate pathway	51.802	52	89.5	224030000000	1833	+	3.50083	0.428275	0.00144516	29.8073	29.6854	29.9379	29.7686	29.3312	29.3562	29.3563	29.4425
Q2FY61	Q2FY61	SAOUHSC_01604						13.89	14	66.7	12773000000	328	+	1.39247	0.419422	0.0338037	27.2025	26.8057	27.445	26.9655	26.8324	26.5539	26.5387	26.816
Q2FY63	Q2FY63	SAOUHSC_01602		biosynthetic process;cellular biosynthetic process;cellular macromolecule biosynthetic process;cellular macromolecule metabolic process;cellular metabolic process;cellular nitrogen compound metabolic process;cellular process;macromolecule biosynthetic process;macromolecule metabolic process;metabolic process;nitrogen compound metabolic process;nucleic acid metabolic process;nucleobase-containing …	binding;DNA binding;nucleic acid binding;nucleic acid binding transcription factor activity;sequence-specific DNA binding transcription factor activity			38.39	13	32.4	3999100000	186	+	2.5791	0.264614	0.00477876	24.4983	24.5972	24.6372	24.6898	24.3493	24.239	24.383	24.3928
Q2FY64	Q2FY64	SAOUHSC_01601	Alpha-amylase	carbohydrate metabolic process;metabolic process;primary metabolic process	alpha-amylase activity;amylase activity;binding;catalytic activity;cation binding;hydrolase activity;hydrolase activity, acting on glycosyl bonds;hydrolase activity, hydrolyzing O-glycosyl compounds;ion binding		Galactose metabolism;Starch and sucrose metabolism	63.905	32	52.8	48098000000	868	+	1.40225	0.208123	0.0327635	27.6713	27.7076	27.5909	27.7675	27.2733	27.5208	27.5983	27.5124
Q2FY65	Q2FY65	SAOUHSC_01600			binding;DNA binding;nucleic acid binding;nucleic acid binding transcription factor activity;sequence-specific DNA binding;sequence-specific DNA binding transcription factor activity			34.374	5	20.9	716840000	30		0.739807	-0.175206	0.149936	23.2621	23.104	23.2921	23.0103	23.5647	23.3276	23.3752	23.1018
Q2FY66	Q2FY66	zwf	Glucose-6-phosphate 1-dehydrogenase	alcohol catabolic process;alcohol metabolic process;carbohydrate catabolic process;carbohydrate metabolic process;catabolic process;cellular carbohydrate catabolic process;cellular carbohydrate metabolic process;cellular metabolic process;cellular nitrogen compound metabolic process;cellular process;coenzyme metabolic process;cofactor metabolic process;glucose catabolic process;glucose metabolic …	binding;catalytic activity;coenzyme binding;cofactor binding;glucose-6-phosphate dehydrogenase activity;NADP binding;nucleotide binding;oxidoreductase activity;oxidoreductase activity, acting on CH-OH group of donors;oxidoreductase activity, acting on the CH-OH group of donors, NAD or NADP as acceptor		Glutathione metabolism;Pentose phosphate pathway	56.965	46	86	60490000000	980	+	3.36016	0.561755	0.00128736	27.7912	27.5694	27.7925	27.6687	27.2932	26.9991	27.1358	27.1467
Q2FY67	Q2FY67	rnz	Ribonuclease Z		3'-tRNA processing endoribonuclease activity;binding;catalytic activity;cation binding;endonuclease activity;endonuclease activity, active with either ribo- or deoxyribonucleic acids and producing 5'-phosphomonoesters;endoribonuclease activity;endoribonuclease activity, producing 5'-phosphomonoesters;hydrolase activity;hydrolase activity, acting on ester bonds;ion binding;metal ion binding;nuclea…		RNA transport	34.584	10	44.1	4885800000	138		0.207712	-0.057538	0.543056	25.1041	24.996	25.0511	25.2511	24.9778	25.0368	25.4001	25.2177
Q2FY68	Q2FY68	proC	Pyrroline-5-carboxylate reductase	amine biosynthetic process;amine metabolic process;biosynthetic process;carboxylic acid biosynthetic process;carboxylic acid metabolic process;cellular amine metabolic process;cellular amino acid biosynthetic process;cellular amino acid metabolic process;cellular biosynthetic process;cellular ketone metabolic process;cellular metabolic process;cellular nitrogen compound biosynthetic process;cellu…	catalytic activity;oxidoreductase activity;oxidoreductase activity, acting on the CH-NH group of donors;oxidoreductase activity, acting on the CH-NH group of donors, NAD or NADP as acceptor;pyrroline-5-carboxylate reductase activity	cell part;cytoplasm;intracellular part	Arginine and proline metabolism	28.758	19	70.5	17753000000	434	+	3.11072	0.427467	0.00209346	26.2383	26.2508	26.2915	26.2366	25.6663	25.7998	25.9913	25.8498
Q2FY71	Q2FY71	SAOUHSC_01594						33.505	25	69.5	57779000000	595	+	4.26305	0.671897	0	28.3327	28.2668	28.2477	28.2104	27.5287	27.5227	27.7762	27.5424
Q2FY72	Q2FY72	SAOUHSC_01593			catalytic activity;hydrolase activity		Purine metabolism	20.439	12	47.2	5682100000	245	+	1.57901	0.267498	0.0228885	25.4987	25.4963	25.3539	25.6206	25.1282	25.2016	25.131	25.4389
Q2FY73	Q2FY73	SAOUHSC_01592			binding;DNA binding;nucleic acid binding;nucleic acid binding transcription factor activity;sequence-specific DNA binding transcription factor activity			17.243	14	61.7	6772800000	322		0.28489	-0.068305	0.442509	24.214	24.2613	24.243	24.2804	24.3277	24.1049	24.2604	24.5789
Q2FY74	Q2FY74	xerD	Tyrosine recombinase XerD	cell cycle;cell division;cellular macromolecule metabolic process;cellular metabolic process;cellular nitrogen compound metabolic process;cellular process;chromosome segregation;DNA metabolic process;DNA recombination;macromolecule metabolic process;metabolic process;nitrogen compound metabolic process;nucleic acid metabolic process;nucleobase-containing compound metabolic process;primary metabol…	binding;catalytic activity;DNA binding;integrase activity;nucleic acid binding;site-specific recombinase activity;tyrosine-based site-specific recombinase activity	cell part;cytoplasm;intracellular part		34.132	14	44.4	2087300000	102		0.329528	-0.138451	0.392	23.8175	23.8317	23.7868	24.1931	24.4372	24.0953	23.7231	23.9273
Q2FY76	Q2FY76	scpA	Segregation and condensation protein A	biosynthetic process;cell cycle;cell division;cellular biosynthetic process;cellular macromolecule biosynthetic process;cellular macromolecule metabolic process;cellular metabolic process;cellular nitrogen compound metabolic process;cellular process;chromosome segregation;DNA metabolic process;DNA replication;macromolecule biosynthetic process;macromolecule metabolic process;metabolic process;nit…		cell part;cytoplasm;intracellular part		28.67	7	40.7	2008400000	72	+	1.26388	-0.644794	0.0438482	24.6761	24.5411	25.1143	25.2106	25.5378	25.7993	24.9195	25.8646
Q2FY77	Q2FY77	scpB	Segregation and condensation protein B	biosynthetic process;cell cycle process;cell division;cellular biosynthetic process;cellular macromolecule biosynthetic process;cellular macromolecule metabolic process;cellular metabolic process;cellular nitrogen compound metabolic process;cellular process;chromosome separation;DNA metabolic process;DNA replication;macromolecule biosynthetic process;macromolecule metabolic process;metabolic proc…		cell part;cytoplasm;intracellular part		20.236	8	45	2178700000	118	+	1.77446	-0.59571	0.0157509	24.2565	24.6279	23.969	24.0413	24.9471	24.8012	24.9995	24.5296
Q2FY78	Q2FY78	SAOUHSC_01587	Pseudouridine synthase	cellular macromolecule metabolic process;cellular metabolic process;cellular nitrogen compound metabolic process;cellular process;macromolecule metabolic process;macromolecule modification;metabolic process;nitrogen compound metabolic process;nucleic acid metabolic process;nucleobase-containing compound metabolic process;primary metabolic process;pseudouridine synthesis;RNA metabolic process;RNA …	binding;catalytic activity;intramolecular transferase activity;isomerase activity;lyase activity;nucleic acid binding;pseudouridine synthase activity;RNA binding			27.969	24	62.4	29119000000	699		0.347672	-0.0489964	0.371399	27.7428	27.7577	27.7584	27.8182	27.7969	27.9681	27.6853	27.8229
Q2FY79	Q2FY79	srrA	Transcriptional regulatory protein SrrA	biological regulation;biosynthetic process;cellular biosynthetic process;cellular macromolecule biosynthetic process;cellular macromolecule metabolic process;cellular metabolic process;cellular nitrogen compound metabolic process;cellular process;cellular response to stimulus;macromolecule biosynthetic process;macromolecule metabolic process;metabolic process;nitrogen compound metabolic process;n…	binding;DNA binding;nucleic acid binding	cell part;cytoplasm;intracellular part	Two-component system	28.161	32	81.7	62627000000	1001	+	2.37058	0.260605	0.00619747	28.3183	28.1809	28.2359	28.3391	28.012	28.1329	27.9625	27.9244
Q2FY80	Q2FY80	srrB	Sensor protein SrrB		adenyl nucleotide binding;adenyl ribonucleotide binding;ATP binding;binding;catalytic activity;kinase activity;molecular transducer activity;nucleotide binding;phosphotransferase activity, alcohol group as acceptor;phosphotransferase activity, nitrogenous group as acceptor;protein histidine kinase activity;protein kinase activity;purine nucleotide binding;purine ribonucleoside triphosphate bindin…	cell part;integral to membrane;intrinsic to membrane;membrane;membrane part;plasma membrane	Two-component system	66.075	33	61.6	8535500000	357	+	2.0427	0.42271	0.00989167	25.8214	25.7152	26.0173	26.0026	25.4569	25.5733	25.2322	25.6032
Q2FY81	Q2FY81	SAOUHSC_01584						33.576	29	72.3	13997000000	517	+	2.79787	-0.429026	0.00323345	25.1311	25.3728	25.0645	25.3372	25.6531	25.6914	25.681	25.5963
Q2FY82	Q2FY82	SAOUHSC_01583						77.18	7	17.2	392310000	36		0.65028	-1.13394	0.182594	20.457	19.7958	22.8118	22.3035	22.0823	22.4968	21.6876	23.6372
[truncated: 939 more rows]
