# Supplementary material for: Isocyanides inhibit bacterial pathogens by covalent targeting of essential metabolic enzymes
Source: Chem Sci. 2024 Jun 26;15(30):11946–55. doi: 10.1039/d4sc01940g (PMC11290450; doi:10.1039/d4sc01940g)
Supplement: SC-015-D4SC01940G-s004 [file SC-015-D4SC01940G-s004.xlsx]

## Sheet: MaxQuant-Results
Leading razor protein	Identifier	Sequence	Ratio H/L 100vs100_1	Ratio H/L 100vs100_2	Ratio H/L 100vs100_3	Ratio H/L 100vs100_4	Median	gene name	name	essential?	Gene ontology (molecular function)	GO class	membrane/cell wall	secreted	Active site	Binding site	DNA binding	Nucleotide binding	Site	Metall binding	Functional site
O05154	O05154_C10	FTIIIPTUNNEATIR	-0.169258	0.057277	-0.0151263	0.153287	0.0210753	tagX	Putative glycosyltransferase TagX	no	transferase activity, transferring glycosyl groups [GO:0016757]	Enzyme
O05154	O05154_C173	FAELQUDETLANTYNHAILVK	-0.224621	-0.0847162	-0.0241057	-0.00743458	-0.054411	tagX	Putative glycosyltransferase TagX	no	transferase activity, transferring glycosyl groups [GO:0016757]	Enzyme
O05154	O05154_C33	ILUIDGGSTDQTIPMIER	-0.391929	-0.166648	-0.204266	-0.0583528	-0.185457	tagX	Putative glycosyltransferase TagX	no	transferase activity, transferring glycosyl groups [GO:0016757]	Enzyme
O05154	O05154_C69	HISLIQLQNASIATUINK	-0.141892	-0.0438392	0.108089		-0.0438392	tagX	Putative glycosyltransferase TagX	no	transferase activity, transferring glycosyl groups [GO:0016757]	Enzyme
O05204	O05204_C127	KLEGSFHFETFISLTUQK	0.198243	0.115566	-0.207844	-0.131108	-0.00777092	ahpF	Alkyl hydroperoxide reductase subunit F	no	alkyl hydroperoxide reductase activity [GO:0008785]; electron transfer activity [GO:0009055]; flavin adenine dinucleotide binding [GO:0050660]; NAD binding [GO:0051287]; protein disulfide oxidoreductase activity [GO:0015035]	Enzyme
O05204	O05204_C335	GVAFUPHCDGPLFENK	0.205518	-0.385507	-0.656217	-0.478286	-0.431896	ahpF	Alkyl hydroperoxide reductase subunit F	no	alkyl hydroperoxide reductase activity [GO:0008785]; electron transfer activity [GO:0009055]; flavin adenine dinucleotide binding [GO:0050660]; NAD binding [GO:0051287]; protein disulfide oxidoreductase activity [GO:0015035]	Enzyme
O05204	O05204_C338	GVAFCPHUDGPLFENK						ahpF	Alkyl hydroperoxide reductase subunit F	no	alkyl hydroperoxide reductase activity [GO:0008785]; electron transfer activity [GO:0009055]; flavin adenine dinucleotide binding [GO:0050660]; NAD binding [GO:0051287]; protein disulfide oxidoreductase activity [GO:0015035]	Enzyme
O06446	O06446_C775	DYQNEGHELFDIMMQNIEEDTUK	-0.0195505	0.0635029	-0.016512	0.0863762	0.0234955	secA1	Protein translocase subunit SecA 1	yes	ATPase-coupled protein transmembrane transporter activity [GO:0015462]; ATP binding [GO:0005524]; metal ion binding [GO:0046872]	Receptor/Transporter/Channel	membrane/cell wall
O06446	O06446_C829	NDDUPCGSGKK	-0.252363	-0.0595701	-0.101196	0.0040339	-0.0803829	secA1	Protein translocase subunit SecA 1	yes	ATPase-coupled protein transmembrane transporter activity [GO:0015462]; ATP binding [GO:0005524]; metal ion binding [GO:0046872]	Receptor/Transporter/Channel	membrane/cell wall							Metall binding	Functional site
O06446	O06446_C831	NDDCPUGSGKK		-0.0655108	-0.0797367		-0.0726238	secA1	Protein translocase subunit SecA 1	yes	ATPase-coupled protein transmembrane transporter activity [GO:0015462]; ATP binding [GO:0005524]; metal ion binding [GO:0046872]	Receptor/Transporter/Channel	membrane/cell wall							Metall binding	Functional site
O06446	O06446_C840	FKNUHGK	-0.280247	-0.330774	-0.475716	-0.269147	-0.30551	secA1	Protein translocase subunit SecA 1	yes	ATPase-coupled protein transmembrane transporter activity [GO:0015462]; ATP binding [GO:0005524]; metal ion binding [GO:0046872]	Receptor/Transporter/Channel	membrane/cell wall							Metall binding	Functional site
O07325	O07325_C175	CVEAUGVDVLDVYSDAYNYGSILTATEK	-0.147554		-0.0877947		-0.117674	ftsA	Cell division protein FtsA	yes	0	not assigned	membrane/cell wall
O07325	O07325_C203	ELGAUVIDIGEDVTQVAFYER	-0.464803	-0.0672131	0.0114956	-0.104744	-0.0859785	ftsA	Cell division protein FtsA	yes	0	not assigned	membrane/cell wall
O34090	O34090_C204	DTLLPAIGQGALGIEUR	-0.14117	0.284271	0.134724	-0.0272087	0.0537579	hemC	Porphobilinogen deaminase	no	hydroxymethylbilane synthase activity [GO:0004418]	Enzyme
O34090	O34090_C95	DVPSVIPEGLTLGUIPDR	-0.22841	0.0801119	0.0533894	0.0912598	0.0667506	hemC	Porphobilinogen deaminase	no	hydroxymethylbilane synthase activity [GO:0004418]	Enzyme
O50581	O50581_C585	SDQQSYUVLIASPK	-0.497344	0.412511		0.0848807	0.0848807	recG	ATP-dependent DNA helicase RecG	no	ATP binding [GO:0005524]; ATP-dependent DNA helicase activity [GO:0004003]; ATP-dependent RNA helicase activity [GO:0004004]; DNA binding [GO:0003677]	Gene expression and Nucleic acid binding
O52582	O52582_C16	IVVVGAVAGGATUASQIR	-0.288366	-0.32317	-0.288953	-0.00287349	-0.28866	cdr	Coenzyme A disulfide reductase	no	CoA-disulfide reductase activity [GO:0050451]; flavin adenine dinucleotide binding [GO:0050660]; NADP binding [GO:0050661]; protein disulfide isomerase activity [GO:0003756]	Enzyme				Binding site		Nucleotide binding			Functional site
O52582	O52582_C43	DMSFANUALPYVIGEVVEDR	-0.112841	-0.15563	-0.09493	-0.0373103	-0.103885	cdr	Coenzyme A disulfide reductase	no	CoA-disulfide reductase activity [GO:0050451]; flavin adenine dinucleotide binding [GO:0050660]; NADP binding [GO:0050661]; protein disulfide isomerase activity [GO:0003756]	Enzyme			Active site	Binding site					Functional site
P0A011	P0A011_C276	FNGVLUGR	-0.296403	-0.285706	-0.157367	-0.319856	-0.291055	lacD	Tagatose 1,6-diphosphate aldolase	no	6-deoxy-6-sulfofructose-1-phosphate aldolase activity [GO:0061595]; tagatose-6-phosphate kinase activity [GO:0009024]; tagatose-bisphosphate aldolase activity [GO:0009025]	Enzyme
P0A011	P0A011_C85	NKDUGLLLAYEK	-0.449671	-0.359749	-0.155486	-0.445028	-0.402389	lacD	Tagatose 1,6-diphosphate aldolase	no	6-deoxy-6-sulfofructose-1-phosphate aldolase activity [GO:0061595]; tagatose-6-phosphate kinase activity [GO:0009024]; tagatose-bisphosphate aldolase activity [GO:0009025]	Enzyme
P0A086	P0A086_C12	EYATLAGGUFWCMVKPFTSYPGIK	-0.30986	-0.264051	-0.0323921	-0.0194732	-0.148222	msrA2	Peptide methionine sulfoxide reductase MsrA 2	no	peptide-methionine (S)-S-oxide reductase activity [GO:0008113]	Enzyme			Active site						Functional site
P0A086	P0A086_C15	TKEYATLAGGCFWUMVKPFTSYPGIK	-0.183245	-0.0652495			-0.124247	msrA2	Peptide methionine sulfoxide reductase MsrA 2	no	peptide-methionine (S)-S-oxide reductase activity [GO:0008113]	Enzyme			Active site						Functional site
P0A088	P0A088_C114	YUINSAAIQFIPYEK	-0.219619	0.0114925	-0.0820644	0.0941318	-0.0352859	msrB	Peptide methionine sulfoxide reductase MsrB	no	peptide-methionine (R)-S-oxide reductase activity [GO:0033743]	Enzyme			Active site						Functional site
P0A088	P0A088_C59	FHSEUGWPSFSK	-0.19512	0.0304067	0.0367495	0.0408223	0.0335781	msrB	Peptide methionine sulfoxide reductase MsrB	no	peptide-methionine (R)-S-oxide reductase activity [GO:0033743]	Enzyme
P0A0B7	P0A0B7_C168	NPGEVUPAK	-0.425265	-0.076226	0.0628611	0.0446221	-0.0158019	ahpC	Alkyl hydroperoxide reductase C	no	peroxidase activity [GO:0004601]; peroxiredoxin activity [GO:0051920]	Enzyme
P0A0B7	P0A0B7_C49	GSWSVVCFYPADFSFVUPTELEDLQNQYEELQK		0.346305		-0.0591793	0.143563	ahpC	Alkyl hydroperoxide reductase C	no	peroxidase activity [GO:0004601]; peroxiredoxin activity [GO:0051920]	Enzyme			Active site						Functional site
P0A0K3	P0A0K3_C105	NDVPTFAIUHGPQILIDTDDLK	1.3069	1.59024		1.49931	1.49931	SAOUHSC_02013	Uncharacterized protein SAOUHSC_02013	no	0	not assigned
P0A0M9	P0A0M9_C108	DEGFYVATMNAQUHAIPFYESLNFK	0.208892	0.178364			0.193628	SAOUHSC_00995	Putative acetyltransferase SAOUHSC_00995	no	transferase activity, transferring acyl groups other than amino-acyl groups [GO:0016747]	Enzyme
P0A0M9	P0A0M9_C14	MLEDUFYIR	-0.314481	-0.178714	-0.0410015	-0.0645252	-0.12162	SAOUHSC_00995	Putative acetyltransferase SAOUHSC_00995	no	transferase activity, transferring acyl groups other than amino-acyl groups [GO:0016747]	Enzyme
P0A0Q0	P0A0Q0_C222	VGKEDFTSFUQLNELTAVVMDYEDEEKVETIK	0.0507455	0.0855606	0.207643	0.184725	0.135143	lacR	Lactose phosphotransferase system repressor	no	DNA binding [GO:0003677]; DNA binding transcription factor activity [GO:0003700]	Gene expression and Nucleic acid binding
P47768	P47768_C514	MUPIETPEGPNIGLINSLSSYAR	-0.30586	-0.172555	-0.0505921	-0.0103087	-0.111573	rpoB	DNA-directed RNA polymerase subunit beta	yes	DNA binding [GO:0003677]; DNA-directed 5'-3' RNA polymerase activity [GO:0003899]; ribonucleoside binding [GO:0032549]	Gene expression and Nucleic acid binding
P47768	P47768_C593	FMDDEVVUR	-0.173419	-0.0959862	-0.00702859	-0.0440177	-0.070002	rpoB	DNA-directed RNA polymerase subunit beta	yes	DNA binding [GO:0003677]; DNA-directed 5'-3' RNA polymerase activity [GO:0003899]; ribonucleoside binding [GO:0032549]	Gene expression and Nucleic acid binding
P47768	P47768_C624	QVVSAATAUIPFLENDDSNR	-0.326968	-0.25281	-0.275577	-0.0954504	-0.264194	rpoB	DNA-directed RNA polymerase subunit beta	yes	DNA binding [GO:0003677]; DNA-directed 5'-3' RNA polymerase activity [GO:0003899]; ribonucleoside binding [GO:0032549]	Gene expression and Nucleic acid binding
P47768	P47768_C722	SNSGTUYNQR	0.293724	0.0806577		0.13014	0.13014	rpoB	DNA-directed RNA polymerase subunit beta	yes	DNA binding [GO:0003677]; DNA-directed 5'-3' RNA polymerase activity [GO:0003899]; ribonucleoside binding [GO:0032549]	Gene expression and Nucleic acid binding
P47768	P47768_C926	MUGRHGNK	-0.275	-0.232582	-0.144632	-0.2659	-0.249241	rpoB	DNA-directed RNA polymerase subunit beta	yes	DNA binding [GO:0003677]; DNA-directed 5'-3' RNA polymerase activity [GO:0003899]; ribonucleoside binding [GO:0032549]	Gene expression and Nucleic acid binding
P60393	P60393_C250	ISVITFHSLEDRLUK	0.0177794	0.151599	-0.169517	-0.139172	-0.0606964	rsmH	Ribosomal RNA small subunit methyltransferase H	no	rRNA (cytosine-N4-)-methyltransferase activity [GO:0071424]	Gene expression and Nucleic acid binding
P60393	P60393_C27	ENGVYIDUTLGGAGHALYLLNQLNDDGR	-0.259219	-0.433175	-0.121675	-0.156241	-0.20773	rsmH	Ribosomal RNA small subunit methyltransferase H	no	rRNA (cytosine-N4-)-methyltransferase activity [GO:0071424]	Gene expression and Nucleic acid binding
P60430	P60430_C188	MILSTUR	-0.317589	-0.197302	-0.580806	-0.213788	-0.265688	rplB	50S ribosomal protein L2	yes	RNA binding [GO:0003723]; rRNA binding [GO:0019843]; structural constituent of ribosome [GO:0003735]; transferase activity [GO:0016740]	Modulator/Scaffolding/Adaptor
P69848	P69848_C24	LSVTDRUNFR	0.768671	1.0767	1.54127		1.0767	moaA	GTP 3',8-cyclase	no	4 iron, 4 sulfur cluster binding [GO:0051539]; GTP 3',8'-cyclase activity [GO:0061798]; GTP binding [GO:0005525]; metal ion binding [GO:0046872]	Enzyme								Metall binding	Functional site
P69848	P69848_C278	LSSDGKFYGULFATVDGFNVK	0.636451	0.992986	1.87723	0.979952	0.986469	moaA	GTP 3',8-cyclase	no	4 iron, 4 sulfur cluster binding [GO:0051539]; GTP 3',8'-cyclase activity [GO:0061798]; GTP binding [GO:0005525]; metal ion binding [GO:0046872]	Enzyme								Metall binding	Functional site
P69848	P69848_C31	CDYUMPK	0.88096	0.966873	0.828632	0.532367	0.854796	moaA	GTP 3',8-cyclase	no	4 iron, 4 sulfur cluster binding [GO:0051539]; GTP 3',8'-cyclase activity [GO:0061798]; GTP binding [GO:0005525]; metal ion binding [GO:0046872]	Enzyme				Binding site				Metall binding	Functional site
P72360	P72360_C191	MSELTSSYEPPIEAUGTWR	0.881273	1.49288	0.690015		0.881273	scdA	Iron-sulfur cluster repair protein ScdA	no	metal ion binding [GO:0046872]	not assigned
P72360	P72360_C30	SVGIDFUCGGQVSIEAAALEK						scdA	Iron-sulfur cluster repair protein ScdA	no	metal ion binding [GO:0046872]	not assigned
P95689	P95689_C102	MTGILUR	-0.432863	-0.290639	-0.341208	-0.068559	-0.315923	serS	Serine--tRNA ligase	yes	ATP binding [GO:0005524]; serine-tRNA ligase activity [GO:0004828]	Gene expression and Nucleic acid binding
P95689	P95689_C260	FTGQSAUFR	-0.247206	-0.207505	-0.0786891	-0.0615851	-0.143097	serS	Serine--tRNA ligase	yes	ATP binding [GO:0005524]; serine-tRNA ligase activity [GO:0004828]	Gene expression and Nucleic acid binding						Nucleotide binding			Functional site
P95689	P95689_C323	VILUTGDIGFSASK	-0.21841	-0.22018	0.0485479	-0.026281	-0.122346	serS	Serine--tRNA ligase	yes	ATP binding [GO:0005524]; serine-tRNA ligase activity [GO:0004828]	Gene expression and Nucleic acid binding
P95689	P95689_C353	EISSUSNCTDFQAR	-0.193297	-0.345725	0.0294052	-0.0846865	-0.138992	serS	Serine--tRNA ligase	yes	ATP binding [GO:0005524]; serine-tRNA ligase activity [GO:0004828]	Gene expression and Nucleic acid binding						Nucleotide binding			Functional site
P95689	P95689_C356	EISSCSNUTDFQAR						serS	Serine--tRNA ligase	yes	ATP binding [GO:0005524]; serine-tRNA ligase activity [GO:0004828]	Gene expression and Nucleic acid binding						Nucleotide binding			Functional site
Q05615	Q05615_C326	AIDELPVIALLUTQAVGTSTIKDAEELK	-0.339765	-0.394999	-0.173628	-0.0670922	-0.256697	aroA	3-phosphoshikimate 1-carboxyvinyltransferase	no	3-phosphoshikimate 1-carboxyvinyltransferase activity [GO:0003866]	Enzyme
Q05615	Q05615_C51	AIMLASLAEGVSTIYKPLLGEDUR	-0.0270455	0.215453	0.237192	0.402191	0.226322	aroA	3-phosphoshikimate 1-carboxyvinyltransferase	no	3-phosphoshikimate 1-carboxyvinyltransferase activity [GO:0003866]	Enzyme
Q2FUQ1	Q2FUQ1_C35	QFVVYTUNNK						rnpA	Ribonuclease P protein component	yes	ribonuclease P activity [GO:0004526]; tRNA binding [GO:0000049]	Gene expression and Nucleic acid binding
Q2FUQ2	Q2FUQ2_C88	EDIIEINUHGGILTINR	-0.302244	-0.0431005	-0.0545223	-0.125812	-0.0901671	mnmE	tRNA modification GTPase MnmE	yes	GTPase activity [GO:0003924]; GTP binding [GO:0005525]; metal ion binding [GO:0046872]	not assigned				Binding site					Functional site
Q2FUQ3	Q2FUQ3_C274	YUPSIEDK	0.0187266	0.165743	0.213634	0.207738	0.18674	mnmG	tRNA uridine 5-carboxymethylaminomethyl modification enzyme MnmG	yes	flavin adenine dinucleotide binding [GO:0050660]	not assigned						Nucleotide binding			Functional site
Q2FUQ3	Q2FUQ3_C45	TLMLTINLDNIAFMPUNPSVGGPAK	-0.17132	-0.00138565	-0.0235044	-0.0736058	-0.0485551	mnmG	tRNA uridine 5-carboxymethylaminomethyl modification enzyme MnmG	yes	flavin adenine dinucleotide binding [GO:0050660]	not assigned
Q2FUQ4	Q2FUQ4_C158	LSVLSELULPLVK	-0.443595	0.0889557	-0.646699	-0.380277	-0.411936	rsmG	Ribosomal RNA small subunit methyltransferase G	no	rRNA (guanine-N7-)-methyltransferase activity [GO:0070043]	Gene expression and Nucleic acid binding
Q2FUR8	Q2FUR8_C69	GGFUYELNTFFK	0.0693117	0.00512655	0.119821	0.360645	0.0945663	SAOUHSC_03034	Uncharacterized protein	no	acetyltransferase activity [GO:0016407]	Enzyme
Q2FUS8	Q2FUS8_C102	LFVUYLGDFK			-1.42322	-0.260117	-0.841667	drp35	Lactonase drp35	no	hydrolase activity [GO:0016787]; metal ion binding [GO:0046872]	not assigned		secreted
Q2FUT4	Q2FUT4_C24	LNLMIPSSSHLIELYNIUSHPQANIYTPK	0.674189		1.0999		0.887045	SAOUHSC_03017	Uncharacterized protein	no	0	not assigned
Q2FUU3	Q2FUU3_C298	TIEDGVVUFYSR						hisF	Histidine biosynthesis bifunctional protein HisIE	no	ATP binding [GO:0005524]; imidazoleglycerol-phosphate synthase activity [GO:0000107]; lyase activity [GO:0016829]; phosphoribosyl-AMP cyclohydrolase activity [GO:0004635]; phosphoribosyl-ATP diphosphatase activity [GO:0004636]	Enzyme
Q2FUV4	Q2FUV4_C125	HGVTLTUR	-0.106141	0.122209			0.00803403	SAOUHSC_02997	Uncharacterized protein	no	aralkylamine N-acetyltransferase activity [GO:0004059]	Enzyme
Q2FUV4	Q2FUV4_C147	NEGVSESUHGGIK	0.000116863	0.181964	0.595802	0.423309	0.302636	SAOUHSC_02997	Uncharacterized protein	no	aralkylamine N-acetyltransferase activity [GO:0004059]	Enzyme
Q2FUV5	Q2FUV5_C147	SAEEHQQHLEKYPEDMHMUHISK	0.25411	0.13711			0.19561	SAOUHSC_02996	Peptide methionine sulfoxide reductase, putative	no	peptide-methionine (S)-S-oxide reductase activity [GO:0008113]	Enzyme
Q2FUV5	Q2FUV5_C95	TGLYSUVDDHLIEAR	-0.354833	-0.145972	0.652142	0.0464212	-0.0497756	SAOUHSC_02996	Peptide methionine sulfoxide reductase, putative	no	peptide-methionine (S)-S-oxide reductase activity [GO:0008113]	Enzyme
Q2FUW0	Q2FUW0_C122	EKUIEAPGYR	-0.240537	-0.0686952	0.291721	0.240253	0.0857791	SAOUHSC_02991	Uncharacterized protein	no	FMN binding [GO:0010181]	not assigned
Q2FUW0	Q2FUW0_C139	ESPVHFEUEYVQTIR	-0.146462	-0.705742	0.299758	0.375396	0.0766481	SAOUHSC_02991	Uncharacterized protein	no	FMN binding [GO:0010181]	not assigned
Q2FUW3	Q2FUW3_C178	YFDDQGEASYQEYLTINGDUVLHEDLK						asp1	Accessory Sec system protein Asp1	no	0	not assigned
Q2FUW5	Q2FUW5_C247	SNVFATYVAQHLGUK	-0.11299	-0.173645	0.0623981	0.225768	-0.0252957	asp3	Accessory Sec system protein Asp3	no	0	not assigned
Q2FUW7	Q2FUW7_C115	SSFVTUYLQNEQK	0.0833836	-0.214608			-0.0656124	gtf1	Glycosyltransferase Gtf1	no	transferase activity, transferring hexosyl groups [GO:0016758]	Enzyme	membrane/cell wall
Q2FUW7	Q2FUW7_C286	YIDFFITATDIQNHMVUR	0.366476	0.371392	0.438612		0.371392	gtf1	Glycosyltransferase Gtf1	no	transferase activity, transferring hexosyl groups [GO:0016758]	Enzyme	membrane/cell wall
Q2FUX1	Q2FUX1_C239	LISQSUIK	0.321235	0.429107			0.375171	SAOUHSC_02974	Uncharacterized protein	no	kinase activity [GO:0016301]; protein-N(PI)-phosphohistidine-sugar phosphotransferase activity [GO:0008982]	Receptor/Transporter/Channel
Q2FUX7	Q2FUX7_C210	DUPFNIEGGDELVLSK	0.598745	0.757342	1.24349	1.01565	0.886496	arcA	Arginine deiminase	no	arginine deiminase activity [GO:0016990]	Enzyme
Q2FUX7	Q2FUX7_C358	EQWNDGSNTLUIRPGVVVTYDR	0.0251706	0.264476	0.222434	0.157044	0.189739	arcA	Arginine deiminase	no	arginine deiminase activity [GO:0016990]	Enzyme
Q2FUX8	Q2FUX8_C277	DSTIFLHULPAFHDTNTLYGQEIYEK	-0.312903	-0.133986	0.0650208	-0.238442	-0.186214	argF	Ornithine carbamoyltransferase	no	amino acid binding [GO:0016597]; ornithine carbamoyltransferase activity [GO:0004585]	Enzyme
Q2FUY1	Q2FUY1_C104	EVNELUTALTDCTVLGLPR	-0.279056	-0.0802252	0.269153	-0.249445	-0.164835	arcR	HTH-type transcriptional regulator ArcR	no	cAMP binding [GO:0030552]; DNA binding [GO:0003677]	Gene expression and Nucleic acid binding						Nucleotide binding			Functional site
Q2FUY1	Q2FUY1_C110	EVNELCTALTDUTVLGLPR	-0.279056		0.378179	0.258941	0.258941	arcR	HTH-type transcriptional regulator ArcR	no	cAMP binding [GO:0030552]; DNA binding [GO:0003677]	Gene expression and Nucleic acid binding						Nucleotide binding			Functional site
Q2FUY1	Q2FUY1_C124	ELMAFLUK	-0.18513	-0.062294	0.759667	-0.352308	-0.123712	arcR	HTH-type transcriptional regulator ArcR	no	cAMP binding [GO:0030552]; DNA binding [GO:0003677]	Gene expression and Nucleic acid binding						Nucleotide binding			Functional site
Q2FUY1	Q2FUY1_C233	HLFNDVUV	-0.1708	-0.135538	0.0370307	0.366476	-0.0492539	arcR	HTH-type transcriptional regulator ArcR	no	cAMP binding [GO:0030552]; DNA binding [GO:0003677]	Gene expression and Nucleic acid binding
Q2FUY1	Q2FUY1_C38	ALADYINIPYSILQPYQSEUFVR	-0.155952	-0.010454	0.597603	-0.198891	-0.083203	arcR	HTH-type transcriptional regulator ArcR	no	cAMP binding [GO:0030552]; DNA binding [GO:0003677]	Gene expression and Nucleic acid binding						Nucleotide binding			Functional site
Q2FUY3	Q2FUY3_C201	LLIMUGK	-0.337576	-0.120953	0.00432161	-0.189121	-0.155037	SAOUHSC_02962	Tributyrin esterase, putative	no	S-formylglutathione hydrolase activity [GO:0018738]	Enzyme
Q2FUY9	Q2FUY9_C133	GUTLILDEAK	0.349479	0.0594937			0.204486	SAOUHSC_02956	DNA-binding response regulator, putative	no	DNA binding [GO:0003677]	Gene expression and Nucleic acid binding					DNA binding				Functional site
Q2FUY9	Q2FUY9_C179	TALIEKUWESENFIDDNTLAVNMTR						SAOUHSC_02956	DNA-binding response regulator, putative	no	DNA binding [GO:0003677]	Gene expression and Nucleic acid binding					DNA binding				Functional site
Q2FUZ0	Q2FUZ0_C182	IHYEPUHHEVLTDVR	-0.41548	-0.599836	-0.065738	-0.391683	-0.403581	SAOUHSC_02955	Sensor histidine kinase, putative	no	ATP binding [GO:0005524]; kinase activity [GO:0016301]	not assigned	membrane/cell wall
Q2FUZ6	Q2FUZ6_C38	VILVVNTATEUIYSEQLK	0.0608775	0.0492125		-0.0311056	0.0492125	SAOUHSC_02949	Glutathione peroxidase	no	glutathione peroxidase activity [GO:0004602]	Enzyme			Active site						Functional site
Q2FUZ8	Q2FUZ8_C299	HIEFLLDDFSESYEPGDUIVALPQNDPELVEK	-0.347839	0.092884	0.249749	0.316146	0.171316	SAOUHSC_02947	Sulfite reductase [NADPH] flavoprotein alpha-component	no	flavin adenine dinucleotide binding [GO:0050660]; FMN binding [GO:0010181]; sulfite reductase (NADPH) activity [GO:0004783]	Enzyme
Q2FUZ8	Q2FUZ8_C448	GVUSVHFAER	-0.28825	-0.0180756	0.0588647	-0.193938	-0.106007	SAOUHSC_02947	Sulfite reductase [NADPH] flavoprotein alpha-component	no	flavin adenine dinucleotide binding [GO:0050660]; FMN binding [GO:0010181]; sulfite reductase (NADPH) activity [GO:0004783]	Enzyme						Nucleotide binding			Functional site
Q2FUZ8	Q2FUZ8_C579	FNEWIEQGAAIYIUGDEK	-1.12825	-1.08626	-0.203452		-1.08626	SAOUHSC_02947	Sulfite reductase [NADPH] flavoprotein alpha-component	no	flavin adenine dinucleotide binding [GO:0050660]; FMN binding [GO:0010181]; sulfite reductase (NADPH) activity [GO:0004783]	Enzyme
Q2FV06	Q2FV06_C168	ISQAURPILK	-0.183015	-0.152115	-0.357548	-0.200117	-0.191566	SAOUHSC_02937	Choline transporter, putative	no	transmembrane transporter activity [GO:0022857]	Receptor/Transporter/Channel	membrane/cell wall
Q2FV10	Q2FV10_C175	IAPALATGUSLVMKPSEITPLTTIR	-0.174263	-0.0901731	-0.0221559	0.0342157	-0.0561645	SAOUHSC_02933	Betaine aldehyde dehydrogenase	no	betaine-aldehyde dehydrogenase activity [GO:0008802]; metal ion binding [GO:0046872]	Enzyme
Q2FV10	Q2FV10_C380	DGLFFEPTVITNUDTSMR	-0.133527	0.352081			0.109277	SAOUHSC_02933	Betaine aldehyde dehydrogenase	no	betaine-aldehyde dehydrogenase activity [GO:0008802]; metal ion binding [GO:0046872]	Enzyme
Q2FV11	Q2FV11_C478	DGETALHPSUSAK	-0.112076	-0.157979	0.115459	0.144359	0.00169111	betA	Oxygen-dependent choline dehydrogenase	no	betaine-aldehyde dehydrogenase activity [GO:0008802]; choline dehydrogenase activity [GO:0008812]; flavin adenine dinucleotide binding [GO:0050660]	Enzyme			Active site						Functional site
Q2FV13	Q2FV13_C18	SYVIEELDDULTIQK	0.0201999	-0.227624	-0.0291758		-0.0291758	SAOUHSC_02930	Uncharacterized protein	no	0	not assigned
Q2FV14	Q2FV14_C191	AVTHUHGWGFAHLQMAPK	0.219215	0.332049	0.690641	0.651408	0.491728	SAOUHSC_02929	Acetyl-CoA synthetase, putative	no	acyl-CoA ligase activity [GO:0003996]; fatty acid ligase activity [GO:0015645]; fatty-acyl-CoA synthase activity [GO:0004321]	Enzyme
Q2FV14	Q2FV14_C266	YQINVLUCTPTEYR						SAOUHSC_02929	Acetyl-CoA synthetase, putative	no	acyl-CoA ligase activity [GO:0003996]; fatty acid ligase activity [GO:0015645]; fatty-acyl-CoA synthase activity [GO:0004321]	Enzyme
Q2FV14	Q2FV14_C267	YQINVLCUTPTEYR	-0.0518029	-0.0374584	0.191689	0.0392788	0.000910208	SAOUHSC_02929	Acetyl-CoA synthetase, putative	no	acyl-CoA ligase activity [GO:0003996]; fatty acid ligase activity [GO:0015645]; fatty-acyl-CoA synthase activity [GO:0004321]	Enzyme
Q2FV14	Q2FV14_C446	EUAVVAK	0.0247594	-0.287512	0.113864	0.0691522	0.0469558	SAOUHSC_02929	Acetyl-CoA synthetase, putative	no	acyl-CoA ligase activity [GO:0003996]; fatty acid ligase activity [GO:0015645]; fatty-acyl-CoA synthase activity [GO:0004321]	Enzyme
Q2FV14	Q2FV14_C96	LGVAIIPUSEMLR	-0.262815	0.0221902	-0.0173878	-0.0462207	-0.0318043	SAOUHSC_02929	Acetyl-CoA synthetase, putative	no	acyl-CoA ligase activity [GO:0003996]; fatty acid ligase activity [GO:0015645]; fatty-acyl-CoA synthase activity [GO:0004321]	Enzyme
Q2FV16	Q2FV16_C275	HLGGFPISGQFLAUTNPQVIEQHDAK	-0.141796	-0.0136109	0.0639171	0.0244615	0.00542531	mqo	Probable malate:quinone oxidoreductase	no	malate dehydrogenase (menaquinone) activity [GO:0052589]; malate dehydrogenase (quinone) activity [GO:0008924]; oxidoreductase activity [GO:0016491]	Enzyme
Q2FV16	Q2FV16_C373	EGUMNHLR	-0.243984	-0.104108	-0.209478	-0.115035	-0.162257	mqo	Probable malate:quinone oxidoreductase	no	malate dehydrogenase (menaquinone) activity [GO:0052589]; malate dehydrogenase (quinone) activity [GO:0008924]; oxidoreductase activity [GO:0016491]	Enzyme
Q2FV16	Q2FV16_C62	NNAGTGHAALUELNYTVLQPDGSIDIEK	-0.106498	-0.423875	0.358846	-0.0708453	-0.0886716	mqo	Probable malate:quinone oxidoreductase	no	malate dehydrogenase (menaquinone) activity [GO:0052589]; malate dehydrogenase (quinone) activity [GO:0008924]; oxidoreductase activity [GO:0016491]	Enzyme
Q2FV20	Q2FV20_C198	TLURQLLLDGCR						SAOUHSC_02920	2-dehydropantoate 2-reductase	no	2-dehydropantoate 2-reductase activity [GO:0008677]	Enzyme
Q2FV27	Q2FV27_C67	VLUSDSFGR	-0.392175	0.0973411	-0.518949	-0.231701	-0.311938	SAOUHSC_02912	Uncharacterized protein	no	0	not assigned
Q2FV28	Q2FV28_C132	CTAUFEMR	-0.0437649	0.388575	1.20546	0.936666	0.662621	queH	Epoxyqueuosine reductase QueH	no	4 iron, 4 sulfur cluster binding [GO:0051539]; epoxyqueuosine reductase activity [GO:0052693]; metal ion binding [GO:0046872]	Enzyme								Metall binding	Functional site
Q2FV28	Q2FV28_C200	SIEMUNDYNIFR	0.844466	0.623118	1.28244	0.96192	0.903193	queH	Epoxyqueuosine reductase QueH	no	4 iron, 4 sulfur cluster binding [GO:0051539]; epoxyqueuosine reductase activity [GO:0052693]; metal ion binding [GO:0046872]	Enzyme
Q2FV32	Q2FV32_C26	SAVETUNNVSKPDKDESTTVSGNNNAHSVIDDLMSK	0.14978	-0.153832	0.160017	0.0999011	0.12484	SAOUHSC_02907	Uncharacterized protein	no	0	not assigned
Q2FV34	Q2FV34_C40	YMFDYSAUK	-0.913651	-0.210513	-0.277866	-0.405069	-0.341468	SAOUHSC_02905	Uncharacterized protein	no	0	not assigned
Q2FV40	Q2FV40_C90	AIELUQK		-1.10939		-0.875275	-0.992332	SAOUHSC_02899	Uncharacterized protein	no	carboxy-lyase activity [GO:0016831]; hydrolase activity [GO:0016787]	Enzyme
Q2FV41	Q2FV41_C158	VNSLAYUSSK	0.328032	0.11023	0.335941	0.255078	0.291555	SAOUHSC_02898	Uncharacterized protein	no	oxidoreductase activity [GO:0016491]	Enzyme
Q2FV42	Q2FV42_C55	SDLUYYVIQR						SAOUHSC_02897	HTH-type transcriptional regulator SAOUHSC_02897	no	DNA binding [GO:0003677]; DNA binding transcription factor activity [GO:0003700]	Gene expression and Nucleic acid binding
Q2FV48	Q2FV48_C114	SCELNSEAFUNK	-0.00398734	-0.209812			-0.1069	SAOUHSC_02891	Uncharacterized protein	no	DNA binding transcription factor activity [GO:0003700]; transcription regulatory region sequence-specific DNA binding [GO:0000976]	Gene expression and Nucleic acid binding
Q2FV58	Q2FV58_C110	SHAUYQGVTHACTNR	0.332622	0.32435			0.328486	crtQ	4,4'-diaponeurosporenoate glycosyltransferase	no	transferase activity [GO:0016740]; transferase activity, transferring glycosyl groups [GO:0016757]	Enzyme	membrane/cell wall
Q2FV60	Q2FV60_C274	ILUTADFPSVAESLMPDFAPIKK	-0.340422	-0.272716	0.0478175	-0.425811	-0.306569	crtN	Dehydrosqualene desaturase	no	oxidoreductase activity [GO:0016491]	Enzyme
Q2FV60	Q2FV60_C69	DVFTAUGK	-0.226881	-0.218514	0.448372	0.349252	0.0653688	crtN	Dehydrosqualene desaturase	no	oxidoreductase activity [GO:0016491]	Enzyme
Q2FV61	Q2FV61_C93	QYNVTLDKEDEVUILYGTK	-0.145382	-0.106576	-0.543825	0.170053	-0.125979	SAOUHSC_02876	Aminotransferase	no	pyridoxal phosphate binding [GO:0030170]; transaminase activity [GO:0008483]	not assigned
Q2FV62	Q2FV62_C235	GAVFVNUAR	0.131721	0.444349	0.403486	0.432959	0.418223	SAOUHSC_02875	D-lactate dehydrogenase, putative	no	D-lactate dehydrogenase activity [GO:0008720]; NAD binding [GO:0051287]	Enzyme
Q2FV63	Q2FV63_C13	SQEILNVEGMSUGHCK	0.263779	-0.271494	-0.598286	-0.584731	-0.428112	copZ	Copper chaperone CopZ	no	copper ion binding [GO:0005507]	not assigned								Metall binding	Functional site
Q2FV63	Q2FV63_C16	SQEILNVEGMSCGHUK	-0.885287	-1.17	-1.24698	-1.24783	-1.20849	copZ	Copper chaperone CopZ	no	copper ion binding [GO:0005507]	not assigned								Metall binding	Functional site
Q2FV66	Q2FV66_C178	DIPPHSLAVGNPUK	-0.103379	-0.109032	0.0422241	-0.0553964	-0.0793879	SAOUHSC_02871	Uncharacterized protein	no	acetyltransferase activity [GO:0016407]; O-acyltransferase activity [GO:0008374]	Enzyme
Q2FV66	Q2FV66_C32	DIUFELNHTRPSATNK	-0.322036	-0.327819	-0.167977	-0.0850682	-0.245007	SAOUHSC_02871	Uncharacterized protein	no	acetyltransferase activity [GO:0016407]; O-acyltransferase activity [GO:0008374]	Enzyme
Q2FV67	Q2FV67_C473	GUTSAVVGYHPFGGFK	-2.0889	-0.986788	-1.56982	-1.36624	-1.46803	rocA	1-pyrroline-5-carboxylate dehydrogenase	no	oxidoreductase activity, acting on the aldehyde or oxo group of donors, NAD or NADP as acceptor [GO:0016620]	Enzyme
Q2FV69	Q2FV69_C37	ALSSSLLQLLEQQLFQTITVNQIUDNALVHR	-0.145409	-0.193952	-0.394077	-0.351941	-0.272946	SAOUHSC_02867	Uncharacterized protein	no	DNA binding [GO:0003677]	Gene expression and Nucleic acid binding					DNA binding				Functional site
Q2FV74	Q2FV74_C295	AUVDLSIQYIPQR		-0.331191		-0.475796	-0.403493	clpL	ATP-dependent Clp protease ATP-binding subunit ClpL	no	ATP binding [GO:0005524]	not assigned
Q2FV75	Q2FV75_C130	MSAQAVGGAVGSNPLSIIVPUHR	0.14952	0.26135	0.406537	0.207518	0.234434	SAOUHSC_02861	Methylated-DNA--protein-cysteine methyltransferase	no	methylated-DNA-[protein]-cysteine S-methyltransferase activity [GO:0003908]	Gene expression and Nucleic acid binding			Active site						Functional site
Q2FV76	Q2FV76_C111	EAUYAATPAIQLAK	-0.0676213	-0.155791	0.0707476	0.0740902	0.00156317	SAOUHSC_02860	HMG-CoA synthase, putative	yes	hydroxymethylglutaryl-CoA synthase activity [GO:0004421]	Enzyme
Q2FV76	Q2FV76_C231	SLADFASLUFHVPFTK	-0.192942	-0.0860938	-0.177865	-0.104263	-0.141064	SAOUHSC_02860	HMG-CoA synthase, putative	yes	hydroxymethylglutaryl-CoA synthase activity [GO:0004421]	Enzyme
Q2FV77	Q2FV77_C366	ASLELLNVESAQELGHVVAAVGLAQNFAAUR	-0.15319	0.0802483	-0.347821	-0.0200478	-0.0866188	SAOUHSC_02859	3-hydroxy-3-methylglutaryl coenzyme A reductase	yes	coenzyme binding [GO:0050662]; hydroxymethylglutaryl-CoA reductase (NADPH) activity [GO:0004420]; hydroxymethylglutaryl-CoA reductase activity [GO:0042282]	Enzyme
Q2FV81	Q2FV81_C45	NQUTWWAFK	-0.0779544	-0.239754	0.00158609		-0.0779544	SAOUHSC_02855	LysM domain protein	no	N-acetylmuramoyl-L-alanine amidase activity [GO:0008745]	Enzyme
Q2FV86	Q2FV86_C161	GVAVVIUPNDLLTEK	-0.217843	0.128953	0.451435	0.241596	0.185275	SAOUHSC_02849	Pyruvate oxidase, putative	no	magnesium ion binding [GO:0000287]; pyruvate oxidase activity [GO:0047112]; thiamine pyrophosphate binding [GO:0030976]	Enzyme
Q2FV86	Q2FV86_C413	FIISSWLGTMGUGLPGAIASK	-0.155839	-0.225886	-0.209795	-0.0711787	-0.182817	SAOUHSC_02849	Pyruvate oxidase, putative	no	magnesium ion binding [GO:0000287]; pyruvate oxidase activity [GO:0047112]; thiamine pyrophosphate binding [GO:0030976]	Enzyme
Q2FV88	Q2FV88_C106	WVFQFEIVSAHGVHUIGTQTGGFYR	-0.278146	-0.248091	-0.110215		-0.248091	SAOUHSC_02846	Uncharacterized protein	no	0	not assigned
Q2FV94	Q2FV94_C112	SSLEIAADDGIKIDIIEEEGDSIGQHPNUAYIK						SAOUHSC_02840	L-serine dehydratase, iron-sulfur-dependent, beta subunit	no	4 iron, 4 sulfur cluster binding [GO:0051539]; L-serine ammonia-lyase activity [GO:0003941]	Enzyme
Q2FV99	Q2FV99_C184	QLTLITUDDYNEK	-0.423912	-0.0938583	0.0309382	0.0256539	-0.0341022	SAOUHSC_02834	Sortase, putative	no	0	not assigned
Q2FVA2	Q2FVA2_C105	QSIDQLVIUGLK	-0.362733	0.216734	-0.12444	-0.105473	-0.114957	SAOUHSC_02831	Uncharacterized protein	no	hydrolase activity [GO:0016787]	not assigned
Q2FVA5	Q2FVA5_C185	THDLDAAYQUYIEQLGFQHVSDFPR	-0.0671224	0.00187429	-0.149377		-0.0671224	SAOUHSC_02828	Uncharacterized protein	no	0	not assigned
Q2FVA6	Q2FVA6_C75	IIASUSFAK	-0.0374584	-0.0167455	-0.122821	0.0905825	-0.0271019	SAOUHSC_02827	Uncharacterized protein	no	0	not assigned
Q2FVA7	Q2FVA7_C95	VYMAULTEK	0.326306	-0.0912793	0.527769	0.288877	0.307591	SAOUHSC_02826	Uncharacterized protein	no	DNA binding transcription factor activity [GO:0003700]; transcription regulatory region DNA binding [GO:0044212]	Gene expression and Nucleic acid binding
Q2FVB2	Q2FVB2_C131	YUSSKYTR						fbp	Fructose-1,6-bisphosphatase class 3	no	fructose 1,6-bisphosphate 1-phosphatase activity [GO:0042132]	Enzyme
Q2FVB2	Q2FVB2_C248	VULANLLR	-0.266646	-0.118633	0.0779266	-0.071209	-0.094921	fbp	Fructose-1,6-bisphosphatase class 3	no	fructose 1,6-bisphosphate 1-phosphatase activity [GO:0042132]	Enzyme
Q2FVB2	Q2FVB2_C367	DTUFQTVNR	-0.111415	-0.0322707	0.0180053	-0.0295292	-0.0308999	fbp	Fructose-1,6-bisphosphatase class 3	no	fructose 1,6-bisphosphate 1-phosphatase activity [GO:0042132]	Enzyme
Q2FVB3	Q2FVB3_C9	GTLIKQEUFK	-0.175615	-0.126313	0.188781	-0.0269104	-0.0766116	SAOUHSC_02821	Membrane spanning protein, putative	no	0	not assigned	membrane/cell wall
Q2FVC1	Q2FVC1_C536	LYVSLKUPNFDDVAQK	0.0471195		-0.196823	-0.294703	-0.196823	pgcA	Phosphoglucomutase	no	magnesium ion binding [GO:0000287]; phosphoglucomutase activity [GO:0004614]	Enzyme
Q2FVC2	Q2FVC2_C20	VINVVGAIIFSDNKILUAQR	-0.321225	-0.286533	-0.129387	-0.0881167	-0.20796	SAOUHSC_02791	Pyrophosphohydrolase, putative	yes	hydrolase activity [GO:0016787]	not assigned
Q2FVC2	Q2FVC2_C60	EEMKUDLIVGDK	-0.274053	-0.0237573	-0.117036	-0.00661065	-0.0703967	SAOUHSC_02791	Pyrophosphohydrolase, putative	yes	hydrolase activity [GO:0016787]	not assigned
Q2FVC2	Q2FVC2_C87	LTTYKUTLNK						SAOUHSC_02791	Pyrophosphohydrolase, putative	yes	hydrolase activity [GO:0016787]	not assigned
Q2FVC3	Q2FVC3_C259	TILUALDVR	-0.361657	-0.0859407	-0.110168	0.0214797	-0.0980545	SAOUHSC_02790	Uncharacterized protein	no	ATP binding [GO:0005524]; DNA binding [GO:0003677]; hydrolase activity [GO:0016787]	Gene expression and Nucleic acid binding
Q2FVC3	Q2FVC3_C403	LQAALESDILUPFHYFGVTDYVHQGIK	0.0601858	0.0828388	0.193583	0.1396	0.11122	SAOUHSC_02790	Uncharacterized protein	no	ATP binding [GO:0005524]; DNA binding [GO:0003677]; hydrolase activity [GO:0016787]	Gene expression and Nucleic acid binding
Q2FVE0	Q2FVE0_C46	INGUHYCVDIHKK	0.462681	-0.0706029	-0.0897432	0.0611541	-0.0047244	SAOUHSC_02774	Alkyl hydroperoxide reductase AhpD	no	peroxidase activity [GO:0004601]; peroxiredoxin activity [GO:0051920]	Enzyme
Q2FVE0	Q2FVE0_C49	INGCHYUVDIHKK	0.208642	-0.0983356	-0.0800574	0.102725	0.0113339	SAOUHSC_02774	Alkyl hydroperoxide reductase AhpD	no	peroxidase activity [GO:0004601]; peroxiredoxin activity [GO:0051920]	Enzyme
Q2FVF1	Q2FVF1_C32	GVSFEUPIGATIAIIGESGSGK	0.266037	0.156397	0.300065		0.266037	SAOUHSC_02763	Peptide ABC transporter, ATP-binding protein, putative	no	ATPase activity [GO:0016887]; ATP binding [GO:0005524]	not assigned
Q2FVF4	Q2FVF4_C438	GMMISVGUIMSQQCHMNTCPVGVATTDAK	-0.313083			0.0867838	-0.113149	SAOUHSC_02760	Glutamate synthase alpha subunit, putative	no	glutamate synthase (NADPH) activity [GO:0004355]; glutamate synthase activity [GO:0015930]	Enzyme	membrane/cell wall
Q2FVF4	Q2FVF4_C449	GMMISVGCIMSQQCHMNTUPVGVATTDAK						SAOUHSC_02760	Glutamate synthase alpha subunit, putative	no	glutamate synthase (NADPH) activity [GO:0004355]; glutamate synthase activity [GO:0015930]	Enzyme	membrane/cell wall
Q2FVG3	Q2FVG3_C296	TDYIQNNYPTTKPIFAUYTK	-0.077041	-0.324785	0.613101	-0.806695	-0.200913	SAOUHSC_02751	Carboxylic ester hydrolase	no	hydrolase activity [GO:0016787]	not assigned
Q2FVG3	Q2FVG3_C347	QQSLAITHUYFK	-0.00993099	0.178109	0.174023	0.171463	0.172743	SAOUHSC_02751	Carboxylic ester hydrolase	no	hydrolase activity [GO:0016787]	not assigned
Q2FVG5	Q2FVG5_C47	WMHPUYTLNNK	-0.126835	-0.115952	0.1121	0.164143	-0.00192625	SAOUHSC_02747	Uncharacterized protein	no	0	not assigned
Q2FVG8	Q2FVG8_C207	LADKIUIMSEGK	-0.365648	-0.0881934	-0.116989	-0.114613	-0.115801	SAOUHSC_02744	Amino acid ABC transporter, ATP-binding protein, putative	no	ATPase activity [GO:0016887]; ATP binding [GO:0005524]	not assigned	membrane/cell wall
Q2FVH8	Q2FVH8_C601	NVNVUTIPFK	-0.419256	-0.359324			-0.38929	SAOUHSC_02733	Membrane protein, putative	no	antiporter activity [GO:0015297]; L-amino acid transmembrane transporter activity [GO:0015179]	Receptor/Transporter/Channel	membrane/cell wall
Q2FVI3	Q2FVI3_C170	KUIYVQPHSYTIENQQQNK	-0.183753	-0.145159	-0.0902346	0.341872	-0.117697	SAOUHSC_02727	Uncharacterized protein	no	0	not assigned
Q2FVI7	Q2FVI7_C196	VAUDVSNPLLGENGATYIYGPQK	-0.260152	-0.614359	0.100709	0.110631	-0.0797217	SAOUHSC_02723	Glycerate kinase, putative	no	glycerate kinase activity [GO:0008887]	Enzyme
Q2FVI7	Q2FVI7_C80	YTVIVNDPLMRPIEAUYAR	0.0196308	-0.0460718	-0.161266	0.264476	-0.0132205	SAOUHSC_02723	Glycerate kinase, putative	no	glycerate kinase activity [GO:0008887]	Enzyme
Q2FVK8	Q2FVK8_C7	PKLILUR	-0.375061	-0.127476	-0.256649	0.155102	-0.192062	gpmA	2,3-bisphosphoglycerate-dependent phosphoglycerate mutase	no	2,3-bisphosphoglycerate-dependent phosphoglycerate mutase activity [GO:0046538]	Enzyme			Active site						Functional site
Q2FVL5	Q2FVL5_C101	KHNULYVLVDPYLIENLR	-0.399197	-0.629166	-1.18879		-0.629166	SAOUHSC_02696	FmhA protein, putative	no	nucleotide binding [GO:0000166]; transferase activity, transferring amino-acyl groups [GO:0016755]	Enzyme
Q2FVL7	Q2FVL7_C44	NGKPLVVVYGDYKUPYCK			0.294077	0.063641	0.178859	SAOUHSC_02694	Uncharacterized protein	no	0	not assigned
Q2FVL8	Q2FVL8_C160	AIVIGGGLLGLEUAR	-0.600184		-0.0252798		-0.312732	SAOUHSC_02684	Assimilatory nitrite reductase [NAD(P)H], large subunit, putative	no	4 iron, 4 sulfur cluster binding [GO:0051539]; flavin adenine dinucleotide binding [GO:0050660]; heme binding [GO:0020037]; metal ion binding [GO:0046872]; NADP binding [GO:0050661]; nitrite reductase [NAD(P)H] activity [GO:0008942]	Enzyme
Q2FVL9	Q2FVL9_C47	IHAIHNIUPHK	-0.219724	-0.26349	-0.0835998	-0.0396366	-0.151662	SAOUHSC_02683	Assimilatory nitrite reductase [NAD(P)H], small subunit, putative	no	2 iron, 2 sulfur cluster binding [GO:0051537]; nitrite reductase [NAD(P)H] activity [GO:0008942]	Enzyme
Q2FVL9	Q2FVL9_C66	QGPLSEGTVSGEYVFUPLHDQK	-0.0175631	-0.419893	-0.00215122	0.0582472	-0.00985715	SAOUHSC_02683	Assimilatory nitrite reductase [NAD(P)H], small subunit, putative	no	2 iron, 2 sulfur cluster binding [GO:0051537]; nitrite reductase [NAD(P)H] activity [GO:0008942]	Enzyme
Q2FVM2	Q2FVM2_C179	DEDGIVLVDQDAUR	-0.123277	-0.144632	0.27011	0.27739	0.0734167	SAOUHSC_02680	Nitrate reductase, beta subunit	no	nitrate reductase activity [GO:0008940]	Enzyme
Q2FVM2	Q2FVM2_C185	YUMTGCPYKK	0.909043	1.18339			1.04622	SAOUHSC_02680	Nitrate reductase, beta subunit	no	nitrate reductase activity [GO:0008940]	Enzyme
Q2FVN3	Q2FVN3_C13	QLUFLFYVSSK	0.587173	0.875544	0.999423	0.994435	0.93499	sarZ	HTH-type transcriptional regulator SarZ	no	DNA binding transcription factor activity [GO:0003700]; transcription regulatory region DNA binding [GO:0044212]	Gene expression and Nucleic acid binding
Q2FVN7	Q2FVN7_C115	EDPELUVLR	-0.238963	-0.064562	-0.066404	-0.100063	-0.0832335	SAOUHSC_02665	Uncharacterized protein	no	cofactor binding [GO:0048037]	not assigned
Q2FVN8	Q2FVN8_C697	YIUFKPS	-0.201029	-0.0232698	0.0272956	-0.154249	-0.0887594	SAOUHSC_02664	Transcriptional regulator, putative	no	DNA binding transcription factor activity [GO:0003700]; sequence-specific DNA binding [GO:0043565]	Gene expression and Nucleic acid binding
Q2FVN9	Q2FVN9_C139	KUANEEER						SAOUHSC_02663	Uncharacterized protein	no	0	not assigned	membrane/cell wall
Q2FVP8	Q2FVP8_C265	LDMHDDUR	0.00690837	0.0267293	0.140747	0.22033	0.0837383	SAOUHSC_02654	Ferredoxin--NADP reductase	no	ferredoxin-NADP+ reductase activity [GO:0004324]	Enzyme
Q2FVP8	Q2FVP8_C283	GFGNTTTSIPGIYAUGDIVYHDAK	-0.0980353	-0.0015975	0.158829	0.0930642	0.0457333	SAOUHSC_02654	Ferredoxin--NADP reductase	no	ferredoxin-NADP+ reductase activity [GO:0004324]	Enzyme				Binding site					Functional site
Q2FVP8	Q2FVP8_C59	PUHEILK	-0.141565	-0.0115044	0.0245283	-0.165784	-0.0765349	SAOUHSC_02654	Ferredoxin--NADP reductase	no	ferredoxin-NADP+ reductase activity [GO:0004324]	Enzyme
Q2FVQ3	Q2FVQ3_C260	HNPMTAUYFVTDDR	0.0239177	-0.0277815			-0.0019319	SAOUHSC_02649	Uncharacterized protein	no	CDP-glycerol glycerophosphotransferase activity [GO:0047355]	Enzyme	membrane/cell wall
Q2FVQ5	Q2FVQ5_C63	LAQPGEESSNVWNNAGTGHSALUELNYTK	0.179256	0.131721	0.397036	0.390338	0.284797	mqo	Probable malate:quinone oxidoreductase	no	malate dehydrogenase (menaquinone) activity [GO:0052589]; malate dehydrogenase (quinone) activity [GO:0008924]	Enzyme
Q2FVQ5	Q2FVQ5_C78	DGTVDUSK	0.359829	0.478598	0.627233	0.662773	0.552915	mqo	Probable malate:quinone oxidoreductase	no	malate dehydrogenase (menaquinone) activity [GO:0052589]; malate dehydrogenase (quinone) activity [GO:0008924]	Enzyme
Q2FVQ9	Q2FVQ9_C4	VQULVVDDDPR	0.107822	-0.109888		0.207893	0.107822	hssR	Heme response regulator HssR	no	DNA binding [GO:0003677]	Gene expression and Nucleic acid binding
Q2FVS1	Q2FVS1_C142	AIDGATLNDUR	0.373732	0.296193	0.709555	0.780058	0.541644	SAOUHSC_02621	Putative 3-methyladenine DNA glycosylase	no	alkylbase DNA N-glycosylase activity [GO:0003905]; DNA binding [GO:0003677]	Gene expression and Nucleic acid binding
Q2FVS1	Q2FVS1_C194	KSDUMFPEDTWK	0.490878	0.891963	0.895768	1.06447	0.893866	SAOUHSC_02621	Putative 3-methyladenine DNA glycosylase	no	alkylbase DNA N-glycosylase activity [GO:0003905]; DNA binding [GO:0003677]	Gene expression and Nucleic acid binding
Q2FVS2	Q2FVS2_C200	AUTSETPK	-0.391815	-0.031437	-0.232375	-0.122341	-0.177358	SAOUHSC_02620	Uncharacterized protein	no	0	not assigned	membrane/cell wall
Q2FVS3	Q2FVS3_C197	MEHVEELUDDVCILDK	-0.207728	-0.190651	0.29125	0.249749	0.0295487	SAOUHSC_02619	Uncharacterized protein	no	ATPase activity [GO:0016887]; ATP binding [GO:0005524]	not assigned
Q2FVS3	Q2FVS3_C201	MEHVEELCDDVUILDK	-0.244467	0.306921	0.226755	0.208143	0.217449	SAOUHSC_02619	Uncharacterized protein	no	ATPase activity [GO:0016887]; ATP binding [GO:0005524]	not assigned
Q2FVS7	Q2FVS7_C100	NNGEHHLHGGUHGLDNK	-0.0536135	-0.126927	0.221939	-0.170053	-0.0902703	SAOUHSC_02614	Aldose 1-epimerase, putative	no	aldose 1-epimerase activity [GO:0004034]; carbohydrate binding [GO:0030246]	Enzyme
Q2FVT0	Q2FVT0_C181	VNEDVAFITDNGNYILDUK	-0.159734	-0.0536004	-0.118116	0.133169	-0.0858583	rpiA	Ribose-5-phosphate isomerase A	yes	ribose-5-phosphate isomerase activity [GO:0004751]	Enzyme
Q2FVT0	Q2FVT0_C55	GYNITGVUTSNK	0.206018	0.28404	0.258459	0.458067	0.271249	rpiA	Ribose-5-phosphate isomerase A	yes	ribose-5-phosphate isomerase activity [GO:0004751]	Enzyme
Q2FVT0	Q2FVT0_C72	IUEINDVDHIDLAIDGADEVDPSLNIIK	-0.333407	-0.139887	-0.270086	0.021764	-0.204987	rpiA	Ribose-5-phosphate isomerase A	yes	ribose-5-phosphate isomerase activity [GO:0004751]	Enzyme
Q2FVT2	Q2FVT2_C86	QAFAGLPDLNQUETLVDYGNVYHDHEELIDTQK						hutG	Formimidoylglutamase	no	formimidoylglutamase activity [GO:0050415]; metal ion binding [GO:0046872]	Enzyme
Q2FVT3	Q2FVT3_C9	SINHIUFSVR	0.127765	-0.00151563			0.0631249	fosB	Metallothiol transferase FosB	no	metal ion binding [GO:0046872]; transferase activity, transferring alkyl or aryl (other than methyl) groups [GO:0016765]	Enzyme								Metall binding	Functional site
Q2FVT5	Q2FVT5_C14	GLSIEUK	-0.255253	0.144438	0.0399806	-0.16196	-0.0609897	hutU	Urocanate hydratase	no	urocanate hydratase activity [GO:0016153]	not assigned
Q2FVT5	Q2FVT5_C204	IDTKYUDVK	-0.211916	0.195977	-0.0485492	0.00936874	-0.0195902	hutU	Urocanate hydratase	no	urocanate hydratase activity [GO:0016153]	not assigned
Q2FVT5	Q2FVT5_C347	PLFUEGK	-0.279739	0.284574	-0.0776379	-0.0915713	-0.0846046	hutU	Urocanate hydratase	no	urocanate hydratase activity [GO:0016153]	not assigned
Q2FVT6	Q2FVT6_C215	QYADFADIFUETGVFTIEQSQHYMQK	-0.228368	0.0094905	-0.023519		-0.023519	hutI	Imidazolonepropionase	no	imidazolonepropionase activity [GO:0050480]; metal ion binding [GO:0046872]	Enzyme
Q2FVT8	Q2FVT8_C225	VNUVAPGPFWSPLQISGGQPQSK	-0.141064	-0.111539	0.123004	0.0640551	-0.0237421	SAOUHSC_02604	Uncharacterized protein	no	oxidoreductase activity [GO:0016491]	Enzyme
Q2FVU3	Q2FVU3_C32	NFDKLNDNDLHIAHFINTHIDEUK						SAOUHSC_02599	Hex regulon repressor, putative	no	carbohydrate derivative binding [GO:0097367]; DNA binding [GO:0003677]; DNA binding transcription factor activity [GO:0003700]	Gene expression and Nucleic acid binding					DNA binding				Functional site
Q2FVU4	Q2FVU4_C471	ENIKDVTNUTTR	-0.138259	-0.165952	-0.56546	-0.216012	-0.190982	SAOUHSC_02597	PTS system component, putative	no	kinase activity [GO:0016301]; protein-N(PI)-phosphohistidine-sugar phosphotransferase activity [GO:0008982]	Receptor/Transporter/Channel	membrane/cell wall		Active site						Functional site
Q2FVV2	Q2FVV2_C123	TIDQIUHCLK	-0.0736665	0.07983	0.316678	0.125011	0.102421	SAOUHSC_02589	Uncharacterized protein	no	carbohydrate derivative binding [GO:0097367]; DNA binding [GO:0003677]; DNA binding transcription factor activity [GO:0003700]	Gene expression and Nucleic acid binding
Q2FVV2	Q2FVV2_C125	TIDQICHULK	-0.146369	-0.125171	0.177478	-0.399266	-0.13577	SAOUHSC_02589	Uncharacterized protein	no	carbohydrate derivative binding [GO:0097367]; DNA binding [GO:0003677]; DNA binding transcription factor activity [GO:0003700]	Gene expression and Nucleic acid binding
Q2FVV6	Q2FVV6_C107	QULSLPQTR	-0.235161	-0.142513	-0.356809	-0.116051	-0.188837	SAOUHSC_02585	Uncharacterized protein	no	DNA binding [GO:0003677]; DNA binding transcription factor activity [GO:0003700]	Gene expression and Nucleic acid binding
Q2FVV6	Q2FVV6_C175	AENVIFIGLLUK	-0.253511	-0.00149066	0.165945	0.0641991	0.0313542	SAOUHSC_02585	Uncharacterized protein	no	DNA binding [GO:0003677]; DNA binding transcription factor activity [GO:0003700]	Gene expression and Nucleic acid binding
Q2FVV6	Q2FVV6_C29	YUNVSKR	-0.209795	-0.278304	-0.184048	-0.094418	-0.196921	SAOUHSC_02585	Uncharacterized protein	no	DNA binding [GO:0003677]; DNA binding transcription factor activity [GO:0003700]	Gene expression and Nucleic acid binding					DNA binding				Functional site
Q2FVV7	Q2FVV7_C139	GEGAFUNGIK	-0.140661	0.0161604	0.184725	0.239642	0.100442	SAOUHSC_02584	Uncharacterized protein	no	inositol monophosphate 1-phosphatase activity [GO:0008934]; metal ion binding [GO:0046872]; nucleotide binding [GO:0000166]	Enzyme
Q2FVV7	Q2FVV7_C14	LIUSWLK	-0.355479	0.0786024	0.05432	-0.122853	-0.0342663	SAOUHSC_02584	Uncharacterized protein	no	inositol monophosphate 1-phosphatase activity [GO:0008934]; metal ion binding [GO:0046872]; nucleotide binding [GO:0000166]	Enzyme
Q2FVV7	Q2FVV7_C185	LVGAUGLDSMR	-0.100701	0.0471195	-0.0501887	-0.0771628	-0.0636757	SAOUHSC_02584	Uncharacterized protein	no	inositol monophosphate 1-phosphatase activity [GO:0008934]; metal ion binding [GO:0046872]; nucleotide binding [GO:0000166]	Enzyme				Binding site		Nucleotide binding			Functional site
Q2FVV7	Q2FVV7_C247	AUHETVLK	-0.0827134	-0.101087	-0.0808506	-0.208628	-0.0919004	SAOUHSC_02584	Uncharacterized protein	no	inositol monophosphate 1-phosphatase activity [GO:0008934]; metal ion binding [GO:0046872]; nucleotide binding [GO:0000166]	Enzyme
Q2FVV9	Q2FVV9_C147	YDPNQUILCGR	0.026446	0.0439044	0.390668	0.38637	0.215137	SAOUHSC_02582	Putative formate dehydrogenase SAOUHSC_02582	no	2 iron, 2 sulfur cluster binding [GO:0051537]; 4 iron, 4 sulfur cluster binding [GO:0051539]; electron transfer activity [GO:0009055]; formate dehydrogenase (NAD+) activity [GO:0008863]; iron-sulfur cluster binding [GO:0051536]; metal ion binding [GO:0046872]; molybdopterin cofactor binding [GO:0043546]; NADH dehydrogenase activity [GO:0003954]	Enzyme								Metall binding	Functional site
Q2FVV9	Q2FVV9_C150	YDPNQCILUGR	0.241596	-0.0525807	0.259182		0.241596	SAOUHSC_02582	Putative formate dehydrogenase SAOUHSC_02582	no	2 iron, 2 sulfur cluster binding [GO:0051537]; 4 iron, 4 sulfur cluster binding [GO:0051539]; electron transfer activity [GO:0009055]; formate dehydrogenase (NAD+) activity [GO:0008863]; iron-sulfur cluster binding [GO:0051536]; metal ion binding [GO:0046872]; molybdopterin cofactor binding [GO:0043546]; NADH dehydrogenase activity [GO:0003954]	Enzyme								Metall binding	Functional site
Q2FVV9	Q2FVV9_C157	CVEAUQDIEVNETIR	0.124725	0.253747	0.320427	-0.157448	0.189236	SAOUHSC_02582	Putative formate dehydrogenase SAOUHSC_02582	no	2 iron, 2 sulfur cluster binding [GO:0051537]; 4 iron, 4 sulfur cluster binding [GO:0051539]; electron transfer activity [GO:0009055]; formate dehydrogenase (NAD+) activity [GO:0008863]; iron-sulfur cluster binding [GO:0051536]; metal ion binding [GO:0046872]; molybdopterin cofactor binding [GO:0043546]; NADH dehydrogenase activity [GO:0003954]	Enzyme								Metall binding	Functional site
Q2FVV9	Q2FVV9_C264	TVUTYCGVGCSFEVWTK	0.447844	0.307895			0.377869	SAOUHSC_02582	Putative formate dehydrogenase SAOUHSC_02582	no	2 iron, 2 sulfur cluster binding [GO:0051537]; 4 iron, 4 sulfur cluster binding [GO:0051539]; electron transfer activity [GO:0009055]; formate dehydrogenase (NAD+) activity [GO:0008863]; iron-sulfur cluster binding [GO:0051536]; metal ion binding [GO:0046872]; molybdopterin cofactor binding [GO:0043546]; NADH dehydrogenase activity [GO:0003954]	Enzyme								Metall binding	Functional site
Q2FVV9	Q2FVV9_C267	TVCTYUGVGCSFEVWTK	0.770279	0.746055		0.583615	0.746055	SAOUHSC_02582	Putative formate dehydrogenase SAOUHSC_02582	no	2 iron, 2 sulfur cluster binding [GO:0051537]; 4 iron, 4 sulfur cluster binding [GO:0051539]; electron transfer activity [GO:0009055]; formate dehydrogenase (NAD+) activity [GO:0008863]; iron-sulfur cluster binding [GO:0051536]; metal ion binding [GO:0046872]; molybdopterin cofactor binding [GO:0043546]; NADH dehydrogenase activity [GO:0003954]	Enzyme								Metall binding	Functional site
Q2FVV9	Q2FVV9_C386	QVIGTNNVDNUSR	0.0955869	-0.279179		0.105678	0.0955869	SAOUHSC_02582	Putative formate dehydrogenase SAOUHSC_02582	no	2 iron, 2 sulfur cluster binding [GO:0051537]; 4 iron, 4 sulfur cluster binding [GO:0051539]; electron transfer activity [GO:0009055]; formate dehydrogenase (NAD+) activity [GO:0008863]; iron-sulfur cluster binding [GO:0051536]; metal ion binding [GO:0046872]; molybdopterin cofactor binding [GO:0043546]; NADH dehydrogenase activity [GO:0003954]	Enzyme
Q2FVV9	Q2FVV9_C390	YUQAPATK	0.0945063	-0.181886	0.299714	0.38648	0.19711	SAOUHSC_02582	Putative formate dehydrogenase SAOUHSC_02582	no	2 iron, 2 sulfur cluster binding [GO:0051537]; 4 iron, 4 sulfur cluster binding [GO:0051539]; electron transfer activity [GO:0009055]; formate dehydrogenase (NAD+) activity [GO:0008863]; iron-sulfur cluster binding [GO:0051536]; metal ion binding [GO:0046872]; molybdopterin cofactor binding [GO:0043546]; NADH dehydrogenase activity [GO:0003954]	Enzyme
Q2FVV9	Q2FVV9_C48	SQDTFVPSICYNESMGPIQTUDTCTVEIDGK	0.133695	0.750435			0.442065	SAOUHSC_02582	Putative formate dehydrogenase SAOUHSC_02582	no	2 iron, 2 sulfur cluster binding [GO:0051537]; 4 iron, 4 sulfur cluster binding [GO:0051539]; electron transfer activity [GO:0009055]; formate dehydrogenase (NAD+) activity [GO:0008863]; iron-sulfur cluster binding [GO:0051536]; metal ion binding [GO:0046872]; molybdopterin cofactor binding [GO:0043546]; NADH dehydrogenase activity [GO:0003954]	Enzyme								Metall binding	Functional site
Q2FVV9	Q2FVV9_C536	FAEEUAK	0.263034	0.105678	0.151599	0.530271	0.207317	SAOUHSC_02582	Putative formate dehydrogenase SAOUHSC_02582	no	2 iron, 2 sulfur cluster binding [GO:0051537]; 4 iron, 4 sulfur cluster binding [GO:0051539]; electron transfer activity [GO:0009055]; formate dehydrogenase (NAD+) activity [GO:0008863]; iron-sulfur cluster binding [GO:0051536]; metal ion binding [GO:0046872]; molybdopterin cofactor binding [GO:0043546]; NADH dehydrogenase activity [GO:0003954]	Enzyme
Q2FVV9	Q2FVV9_C592	GHNNVQGUSDMGSMPDK	-0.14477	-0.168303	0.141538	0.107871	-0.0184495	SAOUHSC_02582	Putative formate dehydrogenase SAOUHSC_02582	no	2 iron, 2 sulfur cluster binding [GO:0051537]; 4 iron, 4 sulfur cluster binding [GO:0051539]; electron transfer activity [GO:0009055]; formate dehydrogenase (NAD+) activity [GO:0008863]; iron-sulfur cluster binding [GO:0051536]; metal ion binding [GO:0046872]; molybdopterin cofactor binding [GO:0043546]; NADH dehydrogenase activity [GO:0003954]	Enzyme
Q2FVV9	Q2FVV9_C63	SUSTVIDRPMTVNTVNNDVK	0.216486	0.188781	0.658828	0.435949	0.326217	SAOUHSC_02582	Putative formate dehydrogenase SAOUHSC_02582	no	2 iron, 2 sulfur cluster binding [GO:0051537]; 4 iron, 4 sulfur cluster binding [GO:0051539]; electron transfer activity [GO:0009055]; formate dehydrogenase (NAD+) activity [GO:0008863]; iron-sulfur cluster binding [GO:0051536]; metal ion binding [GO:0046872]; molybdopterin cofactor binding [GO:0043546]; NADH dehydrogenase activity [GO:0003954]	Enzyme								Metall binding	Functional site
Q2FVV9	Q2FVV9_C934	TSURLEVITK	-0.0228203	-0.0275725	0.0170857	0.170369	-0.00286731	SAOUHSC_02582	Putative formate dehydrogenase SAOUHSC_02582	no	2 iron, 2 sulfur cluster binding [GO:0051537]; 4 iron, 4 sulfur cluster binding [GO:0051539]; electron transfer activity [GO:0009055]; formate dehydrogenase (NAD+) activity [GO:0008863]; iron-sulfur cluster binding [GO:0051536]; metal ion binding [GO:0046872]; molybdopterin cofactor binding [GO:0043546]; NADH dehydrogenase activity [GO:0003954]	Enzyme
Q2FVW3	Q2FVW3_C171	VLYQGYTUFR	-0.182639	-0.146148	-0.113567	-0.022449	-0.129857	SAOUHSC_02579	Uncharacterized protein	no	FAD binding [GO:0071949]	not assigned
Q2FVW3	Q2FVW3_C186	HPDUAKEYWGR	-0.111913	-0.114004	-0.0717244	-0.127462	-0.112959	SAOUHSC_02579	Uncharacterized protein	no	FAD binding [GO:0071949]	not assigned
Q2FVW7	Q2FVW7_C247	SKAPNGWILHIPSUYLGIAQAAR		-0.218565	-0.245455	-0.306074	-0.245455	SAOUHSC_02556	Uncharacterized protein	no	flavin adenine dinucleotide binding [GO:0050660]; oxidoreductase activity, acting on the CH-CH group of donors [GO:0016627]	Enzyme
Q2FVX0	Q2FVX0_C284	TFEUKDGR	-0.73298	-0.595576	-0.268871	0.0367813	-0.432224	SAOUHSC_02553	Uncharacterized protein	no	purine nucleosidase activity [GO:0008477]	Gene expression and Nucleic acid binding
Q2FVX7	Q2FVX7_C262	YATLUGR	-0.211231	0.00619029	0.00317044		0.00317044	SAOUHSC_02545	Uncharacterized protein	no	nucleotidyltransferase activity [GO:0016779]; ubiquitin-like modifier activating enzyme activity [GO:0008641]	Enzyme
Q2FVX8	Q2FVX8_C34	DFDTDKGGQUVR	-0.259384	-0.226667	-0.391375	-0.0115713	-0.243025	SAOUHSC_02544	Molybdenum cofactor biosynthesis protein B	no	0	not assigned
Q2FVY0	Q2FVY0_C310	YLFGLSGNPSAUFTGFELFVKPAVK	-0.378888	-0.114644	-0.0213358	-0.120671	-0.117657	SAOUHSC_02542	Molybdopterin biosynthesis protein moeA, putative	no	0	not assigned
Q2FVY0	Q2FVY0_C326	HMUGALEVFPQIIK	-0.233125	-0.019302	0.138028	-0.151939	-0.0856205	SAOUHSC_02542	Molybdopterin biosynthesis protein moeA, putative	no	0	not assigned
Q2FVY0	Q2FVY0_C386	SGAVVAIAHANUMVMLPGGSR	-0.238817	0	-0.0186003	-0.181689	-0.100145	SAOUHSC_02542	Molybdopterin biosynthesis protein moeA, putative	no	0	not assigned
Q2FVY1	Q2FVY1_C130	VVVYRNEEELQVLQQLSNVUYSINVR		0.255319		-0.186065	0.0346273	SAOUHSC_02541	Molybdopterin-guanine dinucleotide biosynthesis protein MobB	no	GTP binding [GO:0005525]	not assigned
Q2FVY1	Q2FVY1_C156	IKNDUDTQLT	-0.220228	0.0563061	0.0538064	0.732052	0.0550563	SAOUHSC_02541	Molybdopterin-guanine dinucleotide biosynthesis protein MobB	no	GTP binding [GO:0005525]	not assigned
Q2FVZ4	Q2FVZ4_C70	LPYTLUYISR	-0.310039	-0.20244	-0.119463	-0.127331	-0.164885	femX	Lipid II:glycine glycyltransferase	yes	transferase activity, transferring amino-acyl groups [GO:0016755]	Enzyme
Q2FW03	Q2FW03_C600	YKHDNLTTTEUPTCGK						topB	DNA topoisomerase 3	no	DNA binding [GO:0003677]; DNA topoisomerase type I activity [GO:0003917]; metal ion binding [GO:0046872]	Gene expression and Nucleic acid binding
Q2FW03	Q2FW03_C661	CVUGHSETQAHMDQR	-0.217206	-0.251058	0.473735	0.131985	-0.0426106	topB	DNA topoisomerase 3	no	DNA binding [GO:0003677]; DNA topoisomerase type I activity [GO:0003917]; metal ion binding [GO:0046872]	Gene expression and Nucleic acid binding
Q2FW16	Q2FW16_C41	TANIGDVIVUTVK	-0.253257	-0.312416	-0.355271	-0.0740488	-0.282836	rplN	50S ribosomal protein L14	yes	large ribosomal subunit rRNA binding [GO:0070180]; structural constituent of ribosome [GO:0003735]	Modulator/Scaffolding/Adaptor
Q2FW16	Q2FW16_C84	FDENAUVIIR	-0.225328	-0.134242	-0.00478324	-0.0184942	-0.076368	rplN	50S ribosomal protein L14	yes	large ribosomal subunit rRNA binding [GO:0070180]; structural constituent of ribosome [GO:0003735]	Modulator/Scaffolding/Adaptor
Q2FW19	Q2FW19_C43	IUFRELAYK	-0.0310354	0.056488	0.456959	0.410971	0.233729	rpsZ	30S ribosomal protein S14 type Z	yes	metal ion binding [GO:0046872]; rRNA binding [GO:0019843]; structural constituent of ribosome [GO:0003735]	Modulator/Scaffolding/Adaptor								Metall binding	Functional site
Q2FW27	Q2FW27_C130	RIUESCGTTYHLVFNPPK	-0.304469	-0.105613	0.186754	0.278963	0.0405706	adk	Adenylate kinase	yes	adenylate kinase activity [GO:0004017]; ATP binding [GO:0005524]; zinc ion binding [GO:0008270]	Enzyme				Binding site				Metall binding	Functional site
Q2FW27	Q2FW27_C150	VEGIUDIDGGK	-0.248673			-0.608826	-0.42875	adk	Adenylate kinase	yes	adenylate kinase activity [GO:0004017]; ATP binding [GO:0005524]; zinc ion binding [GO:0008270]	Enzyme								Metall binding	Functional site
Q2FW29	Q2FW29_C11	PSVKPIUEK	-0.274909	-0.140852	0.131758	0.184437	-0.00454722	rpmJ	50S ribosomal protein L36	yes	structural constituent of ribosome [GO:0003735]	Modulator/Scaffolding/Adaptor
Q2FW29	Q2FW29_C27	VMVIUENPK	-1.01223	-0.785502	-0.300679	-0.535081	-0.660291	rpmJ	50S ribosomal protein L36	yes	structural constituent of ribosome [GO:0003735]	Modulator/Scaffolding/Adaptor
Q2FW32	Q2FW32_C265	SYNULKR	-0.282158	-0.13095	-0.146867	-0.1067	-0.138908	rpoA	DNA-directed RNA polymerase subunit alpha	yes	DNA binding [GO:0003677]; DNA-directed 5'-3' RNA polymerase activity [GO:0003899]; protein dimerization activity [GO:0046983]	Modulator/Scaffolding/Adaptor
Q2FW37	Q2FW37_C100	TLPDDIYVNNVVTVDDDFHUR	0.0251706	-0.0829273			-0.0288784	truA	tRNA pseudouridine synthase A	no	pseudouridine synthase activity [GO:0009982]; RNA binding [GO:0003723]	Gene expression and Nucleic acid binding
Q2FW37	Q2FW37_C104	YDUVGKR	-0.0612851	-0.383115	0.132116	-0.348776	-0.205031	truA	tRNA pseudouridine synthase A	no	pseudouridine synthase activity [GO:0009982]; RNA binding [GO:0003723]	Gene expression and Nucleic acid binding				Binding site					Functional site
Q2FW37	Q2FW37_C156	AAQQFIGTHDFTGFUSQK		0.109695	0.0142124		0.0619537	truA	tRNA pseudouridine synthase A	no	pseudouridine synthase activity [GO:0009982]; RNA binding [GO:0003723]	Gene expression and Nucleic acid binding
Q2FW45	Q2FW45_C11	MEIHVYTGPLUGFNEYINSEVK	0.411969	0.335941			0.373955	SAOUHSC_02472	Uncharacterized protein	no	ATP binding [GO:0005524]	not assigned
Q2FW46	Q2FW46_C70	TNKDUIFDISK	-0.133939	-0.585821	-0.286797	0.0639171	-0.210368	SAOUHSC_02471	Uncharacterized protein	no	0	not assigned
Q2FW59	Q2FW59_C112	EKDDNILUEEFSYK	0.0926511	-0.27357	0.450667	-0.0279838	0.0323336	SAOUHSC_02458	Uncharacterized protein	no	0	not assigned
Q2FW62	Q2FW62_C189	QETTEWUEK	-0.239958	0.239031	-0.319046	-0.175745	-0.207852	SAOUHSC_02445	Zinc-type alcohol dehydrogenase-like protein	no	oxidoreductase activity [GO:0016491]; zinc ion binding [GO:0008270]	Enzyme
Q2FW70	Q2FW70_C138	VHHPNEILEUILIEAPDLK	-0.494963	-0.12411	-0.0890525	0.0453032	-0.106581	SAOUHSC_02436	Uncharacterized protein	no	0	not assigned
Q2FW81	Q2FW81_C16	YKQDHLUEYEK	-0.235416	-0.214257	-0.213119	-0.102217	-0.213688	SAOUHSC_02423	Probable uridylyltransferase SAOUHSC_02423	no	uridylyltransferase activity [GO:0070569]	Enzyme
Q2FW81	Q2FW81_C278	LVNVDUK	-0.0583313	-0.0979337	-0.297392	-0.0667915	-0.0823626	SAOUHSC_02423	Probable uridylyltransferase SAOUHSC_02423	no	uridylyltransferase activity [GO:0070569]	Enzyme
Q2FW96	Q2FW96_C117	TNHVNIVAUENAIMATDTLKK	-0.133456	-0.0674725	-0.160478	-0.121464	-0.12746	mtlD	Mannitol-1-phosphate 5-dehydrogenase	no	coenzyme binding [GO:0050662]; mannitol-1-phosphate 5-dehydrogenase activity [GO:0008926]	Enzyme
Q2FWA0	Q2FWA0_C2	UGIVGYIGYDNAK	2.33171	1.74648	3.12816	1.51278	2.03909	glmS	Glutamine--fructose-6-phosphate aminotransferase [isomerizing]	yes	carbohydrate derivative binding [GO:0097367]; glutamine-fructose-6-phosphate transaminase (isomerizing) activity [GO:0004360]	Enzyme			Active site						Functional site
Q2FWA0	Q2FWA0_C541	GAHPUIISMEGLEK	-0.327692	-0.0696033	0.0220482	-0.0866452	-0.0781243	glmS	Glutamine--fructose-6-phosphate aminotransferase [isomerizing]	yes	carbohydrate derivative binding [GO:0097367]; glutamine-fructose-6-phosphate transaminase (isomerizing) activity [GO:0004360]	Enzyme
Q2FWB5	Q2FWB5_C12	TAETNYFWLNUGYNR	-0.0573917	-0.369315	-0.286726	0.0586628	-0.172059	SAOUHSC_02383	Uncharacterized protein	no	0	not assigned
Q2FWB5	Q2FWB5_C68	VGDQVIFYQVQTDTGLLGUGEIISVETGAQNK	-0.120279	-0.0314889	0.0535284	0.0164963	-0.00749631	SAOUHSC_02383	Uncharacterized protein	no	0	not assigned
Q2FWB7	Q2FWB7_C76	ILAVGGNPVGTLTEULEQSIVK	-0.580224	-0.309806	-0.350946	-0.285284	-0.330376	SAOUHSC_02381	Uncharacterized protein	no	ferric iron binding [GO:0008199]; oxidoreductase activity, oxidizing metal ions [GO:0016722]	Enzyme
Q2FWC2	Q2FWC2_C63	RPSQULK	1.46764	1.77117	1.97801	1.95043	1.8608	SAOUHSC_02376	Uncharacterized protein	no	0	not assigned	membrane/cell wall
Q2FWC5	Q2FWC5_C373	FGUIWHGDSK						SAOUHSC_02373	Uncharacterized protein	no	ATP binding [GO:0005524]; metal ion binding [GO:0046872]	not assigned
Q2FWC6	Q2FWC6_C17	DILINEUIYFASK	-0.342817	-0.0460718	-0.26048	-0.0819497	-0.171215	SAOUHSC_02372	Uncharacterized protein	no	0	not assigned
Q2FWC9	Q2FWC9_C6	ELUFEGITLK	-0.21075	-0.0573629	-0.279312	0.0430844	-0.134057	SAOUHSC_02370	Uncharacterized protein	no	0	not assigned
Q2FWD1	Q2FWD1_C175	ENVMYVHUTLLPYIK	-0.138205	0.0383672	-0.715716	-0.0487153	-0.0934603	pyrG	CTP synthase	yes	ATP binding [GO:0005524]; CTP synthase activity [GO:0003883]; metal ion binding [GO:0046872]	Enzyme
Q2FWD1	Q2FWD1_C229	IALFUDINK	-0.176068	-0.158435	-0.382607	0.00590296	-0.167251	pyrG	CTP synthase	yes	ATP binding [GO:0005524]; CTP synthase activity [GO:0003883]; metal ion binding [GO:0046872]	Enzyme				Binding site					Functional site
Q2FWD1	Q2FWD1_C239	ESVIEUR	-0.138959	-0.105612	0.0780084	0.0795877	-0.0138017	pyrG	CTP synthase	yes	ATP binding [GO:0005524]; CTP synthase activity [GO:0003883]; metal ion binding [GO:0046872]	Enzyme						Nucleotide binding			Functional site
Q2FWD1	Q2FWD1_C382	ENNVPFFGIULGMQLATVEFSR	0.57889	0.960586			0.769738	pyrG	CTP synthase	yes	ATP binding [GO:0005524]; CTP synthase activity [GO:0003883]; metal ion binding [GO:0046872]	Enzyme			Active site						Functional site
Q2FWD1	Q2FWD1_C439	LGLYSUSIK	0.0935849	0.166101	0.222928	0.258224	0.194514	pyrG	CTP synthase	yes	ATP binding [GO:0005524]; CTP synthase activity [GO:0003883]; metal ion binding [GO:0046872]	Enzyme
Q2FWD1	Q2FWD1_C505	LVEMVEIPTNDFFIAUQFHPEFLSR	0.0565835	0.152119	0.239765	0.197614	0.174866	pyrG	CTP synthase	yes	ATP binding [GO:0005524]; CTP synthase activity [GO:0003883]; metal ion binding [GO:0046872]	Enzyme			Active site						Functional site
Q2FWD2	Q2FWD2_C29	QSLEIQMAAQULIQAIGGEGYVYVK	-0.361528	-0.269634	-0.137949	-0.104542	-0.203792	SAOUHSC_02367	Uncharacterized protein	no	0	not assigned
Q2FWD3	Q2FWD3_C161	EUQELVEK	-0.400035	-0.0239737	-0.24185	0.00633393	-0.132912	SAOUHSC_02366	Uncharacterized protein	yes	fructose-bisphosphate aldolase activity [GO:0004332]; zinc ion binding [GO:0008270]	Enzyme
Q2FWD4	Q2FWD4_C110	KUVIGLPGGCPLGPRPIDQHIK	0.0282862	-0.141717	-0.0440623	-0.118837	-0.0814495	murA	UDP-N-acetylglucosamine 1-carboxyvinyltransferase	no	UDP-N-acetylglucosamine 1-carboxyvinyltransferase activity [GO:0008760]	Enzyme
Q2FWD4	Q2FWD4_C118	CVIGLPGGUPLGPRPIDQHIK	0.0324577	0.118929	0.537533	0.134529	0.126729	murA	UDP-N-acetylglucosamine 1-carboxyvinyltransferase	no	UDP-N-acetylglucosamine 1-carboxyvinyltransferase activity [GO:0008760]	Enzyme			Active site						Functional site
Q2FWD4	Q2FWD4_C243	IEAGTYMUIAAACGENVILNNIVPK	-0.312886	0.329181			0.00814773	murA	UDP-N-acetylglucosamine 1-carboxyvinyltransferase	no	UDP-N-acetylglucosamine 1-carboxyvinyltransferase activity [GO:0008760]	Enzyme
Q2FWD4	Q2FWD4_C248	IEAGTYMCIAAAUGENVILNNIVPK	-0.329395	-0.115894	0.105008		-0.115894	murA	UDP-N-acetylglucosamine 1-carboxyvinyltransferase	no	UDP-N-acetylglucosamine 1-carboxyvinyltransferase activity [GO:0008760]	Enzyme
Q2FWD4	Q2FWD4_C376	AGAULIIAGLIAEGVTTIYNVK	-0.199355	0.0405418	0.090718	0.289362	0.0656299	murA	UDP-N-acetylglucosamine 1-carboxyvinyltransferase	no	UDP-N-acetylglucosamine 1-carboxyvinyltransferase activity [GO:0008760]	Enzyme
Q2FWD5	Q2FWD5_C32	CNDUSAHFSDMK	1.00711	1.11073	1.5378	1.66178	1.32427	SAOUHSC_02364	Uncharacterized protein	no	0	not assigned
Q2FWD5	Q2FWD5_C4	MEVUPYLEETFK	1.68921	1.8017	2.21054	2.17696	1.98933	SAOUHSC_02364	Uncharacterized protein	no	0	not assigned
Q2FWD6	Q2FWD6_C279	VVNNTGQVUTAGTR	0.603502	0.683382		0.946656	0.683382	SAOUHSC_02363	Putative aldehyde dehydrogenase SAOUHSC_02363	no	aldehyde dehydrogenase [NAD(P)+] activity [GO:0004030]	Enzyme			Active site						Functional site
Q2FWD9	Q2FWD9_C12	MYETYHSGWIEUITGSMFSGK	-0.273535	-0.36086	0.188528	0.0405418	-0.116497	tdk	Thymidine kinase	no	ATP binding [GO:0005524]; thymidine kinase activity [GO:0004797]; zinc ion binding [GO:0008270]	Enzyme						Nucleotide binding			Functional site
Q2FWD9	Q2FWD9_C145	LQAVUAVCGSSSSR	-0.383209	-0.611954		-0.419314	-0.419314	tdk	Thymidine kinase	no	ATP binding [GO:0005524]; thymidine kinase activity [GO:0004797]; zinc ion binding [GO:0008270]	Enzyme								Metall binding	Functional site
Q2FWD9	Q2FWD9_C148	LQAVCAVUGSSSSR	-0.327892	-0.390245	-0.0607734	-0.14272	-0.235306	tdk	Thymidine kinase	no	ATP binding [GO:0005524]; thymidine kinase activity [GO:0004797]; zinc ion binding [GO:0008270]	Enzyme								Metall binding	Functional site
Q2FWE2	Q2FWE2_C209	IDGIVQAEQSEEGLESTVLDUTSFPYK	-0.23652	-0.00242577	0.32964	0.234501	0.116038	SAOUHSC_02357	Threonylcarbamoyl-AMP synthase	yes	ATP binding [GO:0005524]; double-stranded RNA binding [GO:0003725]; L-threonylcarbamoyladenylate synthase [GO:0061710]; nucleotidyltransferase activity [GO:0016779]; tRNA binding [GO:0000049]	Enzyme				Binding site					Functional site
Q2FWE2	Q2FWE2_C304	VAFIPSEAQFIQLUQDDNDVK	-0.301728	-0.065491	0.115965	-0.0396366	-0.0525638	SAOUHSC_02357	Threonylcarbamoyl-AMP synthase	yes	ATP binding [GO:0005524]; double-stranded RNA binding [GO:0003725]; L-threonylcarbamoyladenylate synthase [GO:0061710]; nucleotidyltransferase activity [GO:0016779]; tRNA binding [GO:0000049]	Enzyme
Q2FWE3	Q2FWE3_C12	ILFVCTGNTUR	-0.329232	-0.777393	0.333996	-0.0315627	-0.180397	ptpB	Low molecular weight protein-tyrosine-phosphatase PtpB	no	protein tyrosine phosphatase activity [GO:0004725]	Enzyme			Active site						Functional site
Q2FWE3	Q2FWE3_C7	ILFVUTGNTCR	-0.773664	0.123004	0.0780633	-0.0949881	-0.0084624	ptpB	Low molecular weight protein-tyrosine-phosphatase PtpB	no	protein tyrosine phosphatase activity [GO:0004725]	Enzyme			Active site						Functional site
Q2FWE4	Q2FWE4_C124	DPIVVEHITVPUGIDIGQTLIGMHIK	-1.51626	-1.5161	-1.72963	-2.78647	-1.62295	SAOUHSC_02355	UPF0340 protein SAOUHSC_02355	no	0	not assigned
Q2FWE4	Q2FWE4_C141	HVUVPVR	-2.10861	-1.93143	-1.69493	-1.80642	-1.86892	SAOUHSC_02355	UPF0340 protein SAOUHSC_02355	no	0	not assigned
Q2FWE4	Q2FWE4_C23	GDIULIGCSTSEVIGEK	-1.81386	-1.94991	-1.8329		-1.8329	SAOUHSC_02355	UPF0340 protein SAOUHSC_02355	no	0	not assigned
Q2FWE4	Q2FWE4_C69	ETGVTFAFQGUEHINR	0.245617	0.388024	0.578697	0.730227	0.483361	SAOUHSC_02355	UPF0340 protein SAOUHSC_02355	no	0	not assigned
Q2FWE5	Q2FWE5_C238	GGMILUK	-0.255563	-0.119698	0.00619029	0.0160684	-0.0567541	glyA	Serine hydroxymethyltransferase	no	glycine hydroxymethyltransferase activity [GO:0004372]; pyridoxal phosphate binding [GO:0030170]	Enzyme
Q2FWE5	Q2FWE5_C339	EAEETLDSVGITUNK	-0.246926	-0.151202	-0.119244	-0.0626556	-0.135223	glyA	Serine hydroxymethyltransferase	no	glycine hydroxymethyltransferase activity [GO:0004372]; pyridoxal phosphate binding [GO:0030170]	Enzyme
Q2FWE5	Q2FWE5_C64	YYGGUEFVDVTESIAIDR	-0.183775	-0.0854157	-0.181143	-0.186939	-0.182459	glyA	Serine hydroxymethyltransferase	no	glycine hydroxymethyltransferase activity [GO:0004372]; pyridoxal phosphate binding [GO:0030170]	Enzyme				Binding site					Functional site
Q2FWE6	Q2FWE6_C159	FMULIAAPEGVEK	-0.340934	-0.0735906	-0.22923	-0.155389	-0.19231	upp	Uracil phosphoribosyltransferase	no	GTP binding [GO:0005525]; uracil phosphoribosyltransferase activity [GO:0004845]; uridine kinase activity [GO:0004849]	Enzyme
Q2FWE8	Q2FWE8_C193	DQGTIUIYVAIGQK	-0.528087	0.0534501	-0.0850933	-0.223458	-0.154276	atpA	ATP synthase subunit alpha	no	ATP binding [GO:0005524]; proton-transporting ATP synthase activity, rotational mechanism [GO:0046933]	Receptor/Transporter/Channel	membrane/cell wall
Q2FWF6	Q2FWF6_C119	TTMSIVFEUHIYTLR	-0.13914	-0.287202	-0.163769	-0.173449	-0.168609	SAOUHSC_02335	Uncharacterized protein	no	0	not assigned
Q2FWG0	Q2FWG0_C137	ENAIYTIAAMAPUPYIYAELAK	-0.009321	0.0844725	-0.159879	0.440633	0.0375758	tenA	Aminopyrimidine aminohydrolase	no	thiaminase activity [GO:0050334]	Enzyme			Active site	Binding site					Functional site
Q2FWG0	Q2FWG0_C205	QVFLESUIHER	-0.190092	-0.117756		-0.000245279	-0.117756	tenA	Aminopyrimidine aminohydrolase	no	thiaminase activity [GO:0050334]	Enzyme			Active site						Functional site
Q2FWG1	Q2FWG1_C215	HTHGTGUTFSAVITAELAK	1.08172	0.88327	0.860049	1.05297	0.968121	SAOUHSC_02330	Phosphomethylpyrimidine kinase	no	ATP binding [GO:0005524]; phosphomethylpyrimidine kinase activity [GO:0008972]	Enzyme
Q2FWG2	Q2FWG2_C16	IENPLTIUYTNDVVK	-1.29857	-0.556733	-0.751344	-1.0248	-0.88807	thiM	Hydroxyethylthiazole kinase	no	ATP binding [GO:0005524]; hydroxyethylthiazole kinase activity [GO:0004417]; metal ion binding [GO:0046872]	Enzyme
Q2FWG2	Q2FWG2_C190	VTGAGULLGGVIAGFLFR	1.09586	1.27679	1.5827	1.47571	1.37625	thiM	Hydroxyethylthiazole kinase	no	ATP binding [GO:0005524]; hydroxyethylthiazole kinase activity [GO:0004417]; metal ion binding [GO:0046872]	Enzyme				Binding site					Functional site
Q2FWG3	Q2FWG3_C13	MFNQSYLNVYFIUGTSDVPSHR	-0.309502	-0.517792			-0.413647	thiE	Thiamine-phosphate synthase	no	metal ion binding [GO:0046872]; thiamine-phosphate diphosphorylase activity [GO:0004789]	Enzyme
Q2FWG7	Q2FWG7_C213	QFFTEWNUHD	-0.330955	-0.000375149			-0.165665	SAOUHSC_02324	Uncharacterized protein	no	0	not assigned
Q2FWG9	Q2FWG9_C41	MIEEDVYUDDVLTQIR	-0.212568	0.00733905	0.189034	0.248049	0.0981864	SAOUHSC_02322	Uncharacterized protein	no	DNA binding [GO:0003677]; metal ion binding [GO:0046872]	Gene expression and Nucleic acid binding
Q2FWH3	Q2FWH3_C286	ATDUSGLVR	-0.135459	-0.0783047	-0.0925401	0.0378742	-0.0854224	ddl	D-alanine--D-alanine ligase	yes	ATP binding [GO:0005524]; D-alanine-D-alanine ligase activity [GO:0008716]; metal ion binding [GO:0046872]	Enzyme
Q2FWH3	Q2FWH3_C7	ENIUIVFGGK	-0.30381	-0.349763	-0.00257029	-0.119808	-0.211809	ddl	D-alanine--D-alanine ligase	yes	ATP binding [GO:0005524]; D-alanine-D-alanine ligase activity [GO:0008716]; metal ion binding [GO:0046872]	Enzyme
Q2FWH4	Q2FWH4_C255	CISIGVATDNALVUSVDDRDTTGISFTINNK	-0.204349	0.116099		-0.143516	-0.143516	murF	UDP-N-acetylmuramoyl-tripeptide--D-alanyl-D-alanine ligase	yes	ATP binding [GO:0005524]; UDP-N-acetylmuramoyl-tripeptide-D-alanyl-D-alanine ligase activity [GO:0047480]	Enzyme
Q2FWH6	Q2FWH6_C207	LSQUHEDAKDIIK	0.0213433	-0.366949	-0.212333	0.130536	-0.0954947	SAOUHSC_02315	DNA-binding response regulator, putative	no	DNA binding [GO:0003677]	Gene expression and Nucleic acid binding					DNA binding				Functional site
Q2FWH6	Q2FWH6_C63	IQIDKPDVILLDLGLPDKDGLULISEIR	-0.00768112	0.333996	0.0153548	0.247806	0.13158	SAOUHSC_02315	DNA-binding response regulator, putative	no	DNA binding [GO:0003677]	Gene expression and Nucleic acid binding
Q2FWJ4	Q2FWJ4_C217	EIIQUTFIEGLSQK	-0.46965	-0.196343	-0.168463	-0.210262	-0.203303	SAOUHSC_02298	RNA polymerase sigma factor	no	bacterial sigma factor activity [GO:0016987]; DNA binding [GO:0003677]; DNA binding transcription factor activity [GO:0003700]	Gene expression and Nucleic acid binding
Q2FWJ9	Q2FWJ9_C78	GITUASAGNHAQGVAYTAK	-0.497934	0.0193461		-0.240851	-0.240851	ilvA	L-threonine dehydratase biosynthetic IlvA	no	L-threonine ammonia-lyase activity [GO:0004794]; pyridoxal phosphate binding [GO:0030170]	Enzyme				Binding site					Functional site
Q2FWK4	Q2FWK4_C199	AGVIETTFKEETETDLFGEQAVLUGGVSK	0.258217	0.578987	0.54409	0.750864	0.561538	ilvC	Ketol-acid reductoisomerase (NADP(+))	no	ketol-acid reductoisomerase activity [GO:0004455]; metal ion binding [GO:0046872]; NADP binding [GO:0050661]	Enzyme								Metall binding	Functional site
Q2FWK6	Q2FWK6_C358	FLEULNDKNVETIEHSDWVK						SAOUHSC_02282	Acetolactate synthase	no	acetolactate synthase activity [GO:0003984]; flavin adenine dinucleotide binding [GO:0050660]; magnesium ion binding [GO:0000287]; thiamine pyrophosphate binding [GO:0030976]	Enzyme
Q2FWK7	Q2FWK7_C409	AIUFNSHDEAVEAIDNR	-0.211131	-0.067198	-0.00301839	0.153805	-0.0351082	ilvD	Dihydroxy-acid dehydratase	no	4 iron, 4 sulfur cluster binding [GO:0051539]; dihydroxy-acid dehydratase activity [GO:0004160]; metal ion binding [GO:0046872]	Enzyme
Q2FWK9	Q2FWK9_C68	LHHMDUYR	-0.127715	0.0221902	-0.0478305	-0.0794018	-0.0636161	SAOUHSC_02280	Uncharacterized protein	yes	0	not assigned
Q2FWL2	Q2FWL2_C14	TKDILILAVETSUDETSVSVIK	-0.0521917	0.12618	0.104739	0.178492	0.11546	tsaD	tRNA N6-adenosine threonylcarbamoyltransferase	yes	metal ion binding [GO:0046872]; metalloendopeptidase activity [GO:0004222]; N(6)-L-threonylcarbamoyladenine synthase activity [GO:0061711]	Enzyme
Q2FWL2	Q2FWL2_C302	LUTDNAAMIGVAGHYLYQQGR	0.081476	0.154324	0.18954	0.227495	0.171932	tsaD	tRNA N6-adenosine threonylcarbamoyltransferase	yes	metal ion binding [GO:0046872]; metalloendopeptidase activity [GO:0004222]; N(6)-L-threonylcarbamoyladenine synthase activity [GO:0061711]	Enzyme								Metall binding	Functional site
Q2FWL3	Q2FWL3_C432	IYUFIDEIFK	-0.244463	-0.440029	-0.115488		-0.244463	SAOUHSC_02276	MutS domain V protein	no	ATP binding [GO:0005524]; damaged DNA binding [GO:0003684]; DNA-dependent ATPase activity [GO:0008094]; mismatched DNA binding [GO:0030983]	Gene expression and Nucleic acid binding	membrane/cell wall
Q2FWL8	Q2FWL8_C12	MIHELGTVGMVUPFPLIEAQK	-0.108703	0.674865	0.771209	0.0871912	0.381028	SAOUHSC_02271	Uncharacterized protein	no	0	not assigned
Q2FWM0	Q2FWM0_C292	TIHYNYFEAGQUAMEEIQQMLK	-0.60799	-0.0310614	0.235972	-0.222128	-0.126595	SAOUHSC_02269	Sucrose operon repressor, putative	no	DNA binding [GO:0003677]	Gene expression and Nucleic acid binding
Q2FWM1	Q2FWM1_C320	VLIGWMGLPEIEYPTDNEGWAHULTIPR	0.0257376	-0.077924			-0.0260932	SAOUHSC_02268	Invertase	no	beta-fructofuranosidase activity [GO:0004564]	Enzyme
Q2FWM1	Q2FWM1_C451	QLQIFVDTSSIEIFUNDGER	-0.56578	-0.440988		-0.151458	-0.440988	SAOUHSC_02268	Invertase	no	beta-fructofuranosidase activity [GO:0004564]	Enzyme
Q2FWM2	Q2FWM2_C38	QIGGAPUNVACTVQK	0.275245	0.129876		0.273456	0.273456	SAOUHSC_02267	Fructokinase, putative	no	kinase activity [GO:0016301]; phosphotransferase activity, alcohol group as acceptor [GO:0016773]	Enzyme
Q2FWM4	Q2FWM4_C169	FFRUHNSFVVNR			0.347892	0.15782	0.252856	SAOUHSC_02265	Accessory gene regulator protein A	no	DNA binding [GO:0003677]	Gene expression and Nucleic acid binding
Q2FWM4	Q2FWM4_C198	EHUYASVR	-0.150946	-0.0841044	0.10916	0.246104	0.0125278	SAOUHSC_02265	Accessory gene regulator protein A	no	DNA binding [GO:0003677]	Gene expression and Nucleic acid binding
Q2FWM4	Q2FWM4_C25	NMNDIGUYFLDIQLSTDINGIK	-0.165645	-0.196013	0.161694	0.119157	-0.0232439	SAOUHSC_02265	Accessory gene regulator protein A	no	DNA binding [GO:0003677]	Gene expression and Nucleic acid binding
Q2FWM4	Q2FWM4_C93	IIDULETAHTR	-0.10698	-0.020399	-0.135269	0.0160684	-0.0636893	SAOUHSC_02265	Accessory gene regulator protein A	no	DNA binding [GO:0003677]	Gene expression and Nucleic acid binding
Q2FWN7	Q2FWN7_C50	NVTUDDMSQIGISIR		0.260989	0.968717		0.614853	SAOUHSC_02245	Uncharacterized protein	no	methyltransferase activity [GO:0008168]	not assigned
Q2FWN7	Q2FWN7_C86	DLIVVNIGUGLDTR	0.14091	0.319502	0.341758	0.430392	0.33063	SAOUHSC_02245	Uncharacterized protein	no	methyltransferase activity [GO:0008168]	not assigned
Q2FWN8	Q2FWN8_C257	EISEEDANYASGLTAVUSIINGGK		-0.0246633	0.287354	0.636729	0.287354	SAOUHSC_02244	Uncharacterized protein	no	metal ion binding [GO:0046872]; metallopeptidase activity [GO:0008237]	Enzyme
Q2FWR2	Q2FWR2_C34	EISNGHUNYWK	-0.1509	-0.00701647	-0.0364371	-0.0707468	-0.0535919	SAOUHSC_02218	Conserved hypothetical phage protein	no	0	not assigned
Q2FWW3	Q2FWW3_C407	IAFSUVEKEDIPHVFDSIAK	-0.286304	-0.0660951	-0.197947	-0.0728772	-0.135412	SAOUHSC_02158	Uncharacterized protein	no	catalytic activity [GO:0003824]; pyridoxal phosphate binding [GO:0030170]	Enzyme
Q2FWW9	Q2FWW9_C187	LEDIELIUDR	-0.215015	-0.101962	-0.134878	-0.08707	-0.11842	SAOUHSC_02152	ABC transporter, ATP-binding protein, putative	yes	ATPase activity [GO:0016887]; ATP binding [GO:0005524]	not assigned
Q2FWX1	Q2FWX1_C63	VLVITEDWUGDAMMNLPILK	-0.1741	-0.0543324	-0.0702999	0.0221902	-0.0623161	SAOUHSC_02150	Uncharacterized protein	no	0	not assigned
Q2FWX5	Q2FWX5_C172	KKPANGFVUYMIGR						SAOUHSC_02146	Uncharacterized protein	no	0	not assigned
Q2FWX5	Q2FWX5_C183	LILENUR	-0.407823	-0.165062	-0.020121	-0.115566	-0.140314	SAOUHSC_02146	Uncharacterized protein	no	0	not assigned
Q2FWX5	Q2FWX5_C231	YDNIUTNHFEILTHENR	-0.285425	-0.16895	-0.0609688	-0.0740967	-0.121523	SAOUHSC_02146	Uncharacterized protein	no	0	not assigned
Q2FWX8	Q2FWX8_C328	ITLUDNTR	-0.789599	0.229028	-0.220855	0.0396781	-0.0905886	SAOUHSC_02143	Uncharacterized protein SAOUHSC_02143	no	6-phosphogluconolactonase activity [GO:0017057]	Enzyme
Q2FWX8	Q2FWX8_C339	VASEGVUVIF	-0.312276	0.181166	-0.13949	0.0233263	-0.0580819	SAOUHSC_02143	Uncharacterized protein SAOUHSC_02143	no	6-phosphogluconolactonase activity [GO:0017057]	Enzyme
Q2FWX8	Q2FWX8_C61	EGEQUGVASLK	-0.122287	0.383833	-0.324949	-0.0109218	-0.0666044	SAOUHSC_02143	Uncharacterized protein SAOUHSC_02143	no	6-phosphogluconolactonase activity [GO:0017057]	Enzyme
Q2FWX8	Q2FWX8_C89	AGTGUYVSISEDKR	-0.362547	0.215741	-0.698529	-0.551903	-0.457225	SAOUHSC_02143	Uncharacterized protein SAOUHSC_02143	no	6-phosphogluconolactonase activity [GO:0017057]	Enzyme
Q2FWX9	Q2FWX9_C233	IUFGKFTNAGQTCVAPDYILVHESVKDDLITALSK						SAOUHSC_02142	Aldehyde dehydrogenase	no	aldehyde dehydrogenase [NAD(P)+] activity [GO:0004030]	Enzyme
Q2FWX9	Q2FWX9_C244	FTNAGQTUVAPDYILVHESVK	-2.12017	-1.13262	-1.01667	-1.04192	-1.08727	SAOUHSC_02142	Aldehyde dehydrogenase	no	aldehyde dehydrogenase [NAD(P)+] activity [GO:0004030]	Enzyme			Active site						Functional site
Q2FWY1	Q2FWY1_C110	IANFETAGPLUYR	-0.0046385	0.0997665	0.20201	0.23131	0.150888	ppaC	Probable manganese-dependent inorganic pyrophosphatase	yes	inorganic diphosphatase activity [GO:0004427]; metal ion binding [GO:0046872]	Enzyme
Q2FWY1	Q2FWY1_C118	AEPVGUTATILYK	0.208018	0.242328	0.522859	0.495695	0.369012	ppaC	Probable manganese-dependent inorganic pyrophosphatase	yes	inorganic diphosphatase activity [GO:0004427]; metal ion binding [GO:0046872]	Enzyme
Q2FWY1	Q2FWY1_C158	SPTUTQQDVK	-0.0602318	0.159629	0.293841	0.187008	0.173318	ppaC	Probable manganese-dependent inorganic pyrophosphatase	yes	inorganic diphosphatase activity [GO:0004427]; metal ion binding [GO:0046872]	Enzyme
Q2FWY2	Q2FWY2_C133	SINQVEIVGVUTDICVLHTAISAYNLGYK	0.646439	0.760604			0.703522	SAOUHSC_02139	Pyrazinamidase/nicotinamidase, putative	no	hydrolase activity [GO:0016787]	not assigned
Q2FWY3	Q2FWY3_C150	SUSFEGFIDYSGER		0.0528332	0.207143	-0.112787	0.0528332	SAOUHSC_02138	Uncharacterized protein	no	0	not assigned
Q2FWY3	Q2FWY3_C261	FINUEGGIR	-0.082637	0.00374614	-0.109141	0.0930192	-0.0394454	SAOUHSC_02138	Uncharacterized protein	no	0	not assigned
Q2FWY3	Q2FWY3_C46	GTYDIUKPLTIYGNTTLLLDNETILR	0.103934	-0.394487	0.875308		0.103934	SAOUHSC_02138	Uncharacterized protein	no	0	not assigned
Q2FWY3	Q2FWY3_C68	RUHSGPLLK	0.0159257	0.240253	-0.514305	0.0859685	0.0509471	SAOUHSC_02138	Uncharacterized protein	no	0	not assigned
Q2FWY9	Q2FWY9_C186	QPAAYUGVVGMKPTYGR	0.0405418	0.0851527	0.136979	0.15043	0.111066	gatA	Glutamyl-tRNA(Gln) amidotransferase subunit A	yes	amidase activity [GO:0004040]; ATP binding [GO:0005524]; glutaminyl-tRNA synthase (glutamine-hydrolyzing) activity [GO:0050567]	Enzyme
Q2FWY9	Q2FWY9_C91	DNIITNGLETTUASK	-0.037688	0.181434	0.280237	0.286261	0.230835	gatA	Glutamyl-tRNA(Gln) amidotransferase subunit A	yes	amidase activity [GO:0004040]; ATP binding [GO:0005524]; glutaminyl-tRNA synthase (glutamine-hydrolyzing) activity [GO:0050567]	Enzyme
Q2FWZ3	Q2FWZ3_C162	SHDIIDMESULIQDSQHQEVMNEVK						SAOUHSC_02113	RNA methyltransferase, TrmA family, putative	no	4 iron, 4 sulfur cluster binding [GO:0051539]; metal ion binding [GO:0046872]; RNA binding [GO:0003723]; RNA methyltransferase activity [GO:0008173]	Gene expression and Nucleic acid binding
Q2FWZ3	Q2FWZ3_C390	GUDETFIQTLLTLEPK	0.153805	-0.287122	-0.203662	-0.352053	-0.245392	SAOUHSC_02113	RNA methyltransferase, TrmA family, putative	no	4 iron, 4 sulfur cluster binding [GO:0051539]; metal ion binding [GO:0046872]; RNA binding [GO:0003723]; RNA methyltransferase activity [GO:0008173]	Gene expression and Nucleic acid binding
Q2FWZ3	Q2FWZ3_C411	RIVYISUNPATQQR	-0.440342	0.0996319	-0.00546372		-0.00546372	SAOUHSC_02113	RNA methyltransferase, TrmA family, putative	no	4 iron, 4 sulfur cluster binding [GO:0051539]; metal ion binding [GO:0046872]; RNA binding [GO:0003723]; RNA methyltransferase activity [GO:0008173]	Gene expression and Nucleic acid binding			Active site						Functional site
Q2FWZ3	Q2FWZ3_C74	VAPPUIYYER	-0.14551	-0.0702696	0.0361868	-0.0986446	-0.0844571	SAOUHSC_02113	RNA methyltransferase, TrmA family, putative	no	4 iron, 4 sulfur cluster binding [GO:0051539]; metal ion binding [GO:0046872]; RNA binding [GO:0003723]; RNA methyltransferase activity [GO:0008173]	Gene expression and Nucleic acid binding
Q2FWZ6	Q2FWZ6_C155	AUAMITFR						SAOUHSC_02110	Uncharacterized protein	no	3'-5' exonuclease activity [GO:0008408]; nucleic acid binding [GO:0003676]	Gene expression and Nucleic acid binding
Q2FWZ9	Q2FWZ9_C202	YUPNCGR						SAOUHSC_02107	UDP-N-acetylmuramyl tripeptide synthetase, putative	yes	ATP binding [GO:0005524]	not assigned
Q2FWZ9	Q2FWZ9_C205	YCPNUGR	-1.05451	-1.28328	-0.808715	-0.833002	-0.943757	SAOUHSC_02107	UDP-N-acetylmuramyl tripeptide synthetase, putative	yes	ATP binding [GO:0005524]	not assigned
Q2FX00	Q2FX00_C53	VNVVEINETEGITFDEUDIFFIGGGSDREQALATK	-0.12885	0.29725	0.215492	0.304978	0.256371	SAOUHSC_02106	Uncharacterized protein	yes	catalytic activity [GO:0003824]	Enzyme
Q2FX00	Q2FX00_C94	EAIEDGMPGLTIUGGYQFLGK	-0.134018	-0.24226	0.0806577	0.0274372	-0.0532903	SAOUHSC_02106	Uncharacterized protein	yes	catalytic activity [GO:0003824]	Enzyme
Q2FX05	Q2FX05_C123	VUDVATMAFENAIAK	0.000144262	0.29725	-0.00903062	0.275245	0.137695	map	Methionine aminopeptidase	yes	metal ion binding [GO:0046872]; metalloaminopeptidase activity [GO:0070006]	Enzyme
Q2FX05	Q2FX05_C19	EIGYIUAK	-0.0579923	0.223299	-0.209578	-0.00177561	-0.0298839	map	Methionine aminopeptidase	yes	metal ion binding [GO:0046872]; metalloaminopeptidase activity [GO:0070006]	Enzyme
Q2FX12	Q2FX12_C13	VDVAFVCLGNIUR	-0.150237	-0.205063	0.206893	0.0125625	-0.0688375	ptpA	Low molecular weight protein-tyrosine-phosphatase PtpA	no	protein tyrosine phosphatase activity [GO:0004725]	Enzyme			Active site						Functional site
Q2FX12	Q2FX12_C8	VDVAFVULGNICR	-0.258326	0.0181124	0.351741	0.0857759	0.0519441	ptpA	Low molecular weight protein-tyrosine-phosphatase PtpA	no	protein tyrosine phosphatase activity [GO:0004725]	Enzyme			Active site						Functional site
Q2FX14	Q2FX14_C53	SSVETLELTHLIVEEAYHUGASDVR	-0.163284	-0.0874421	0.132643	0.0768327	-0.0053047	SAOUHSC_02092	Aminopeptidase PepS, putative	no	aminopeptidase activity [GO:0004177]	Enzyme
Q2FX16	Q2FX16_C47	CSHUAVGYTLQTVDPEPLDMDLIYR						SAOUHSC_02090	Conserved hypothetical phage protein	no	catalytic activity [GO:0003824]; iron-sulfur cluster binding [GO:0051536]	Enzyme
Q2FX17	Q2FX17_C106	ITTTQUTAFR	-0.529343	-0.384452	-0.258926		-0.384452	SAOUHSC_02089	Integrase, phage family, putative	no	DNA binding [GO:0003677]	Gene expression and Nucleic acid binding
Q2FX19	Q2FX19_C194	YTQLLETVNDKDFETHIVEAYDUFMSEK	0.0819592	0.140655	0.272262	0.35036	0.206459	SAOUHSC_02087	Conserved hypothetical phage protein	no	0	not assigned
Q2FX21	Q2FX21_C6	MKITNUK	-0.165208	0.232661	-0.105644	-0.0926632	-0.0991536	SAOUHSC_02085	Conserved hypothetical phage protein	no	0	not assigned
Q2FX22	Q2FX22_C207	VDIUEDYINLVSLNPK	-0.171527	-0.175895	-0.157197	0.0906233	-0.164362	SAOUHSC_02084	Phage repressor protein, putative	no	sequence-specific DNA binding [GO:0043565]	Gene expression and Nucleic acid binding
Q2FX33	Q2FX33_C134	SKKPTFNDWGEUATR	0.00417776	0.318577	-0.0471744	0.13014	0.0671589	SAOUHSC_02072	Conserved hypothetical phage protein	no	0	not assigned
Q2FX36	Q2FX36_C106	DVNLTWIUK	-0.0633036	0.325617	0.174151	-0.0824842	0.0554235	SAOUHSC_02064	Phi ETA orf 25-like protein	no	0	not assigned
Q2FX49	Q2FX49_C21	KLEDELUDYPNYHK	0.093425	0.205142	0.301354		0.205142	SAOUHSC_02051	Int gene activator RinA	no	0	not assigned
Q2FX49	Q2FX49_C69	TEMAVTNYLUSIR	0.285935	0.517225	0.75103	0.999106	0.634128	SAOUHSC_02051	Int gene activator RinA	no	0	not assigned
Q2FX89	Q2FX89_C23	TUAGTNTHLHLIK	-0.0668907	-0.0336375	-0.15023	-0.0721586	-0.0695247	SAOUHSC_01988	Putative tRNA (cytidine(34)-2'-O)-methyltransferase	no	RNA binding [GO:0003723]; S-adenosylmethionine-dependent methyltransferase activity [GO:0008757]; tRNA methyltransferase activity [GO:0008175]	Gene expression and Nucleic acid binding
Q2FX94	Q2FX94_C209	YMLDRUETMLSESK	-0.259329	-0.163247	-0.419265	-0.0708715	-0.211288	fumC	Fumarate hydratase class II	no	fumarate hydratase activity [GO:0004333]	Enzyme
Q2FX95	Q2FX95_C210	EAVUQLEIK	-0.196465	-0.180495	-0.250142	-0.0129696	-0.18848	SAOUHSC_01982	Ribosomal large subunit pseudouridine synthase, RluD subfamily, putative	no	pseudouridine synthase activity [GO:0009982]; pseudouridylate synthase activity [GO:0004730]; RNA binding [GO:0003723]	Gene expression and Nucleic acid binding
Q2FX96	Q2FX96_C79	DGSUWCVK						SAOUHSC_01981	Sensor histidine kinase, putative	no	phosphorelay sensor kinase activity [GO:0000155]; protein dimerization activity [GO:0046983]	Modulator/Scaffolding/Adaptor	membrane/cell wall
Q2FX96	Q2FX96_C99	ASNIVNUSR						SAOUHSC_01981	Sensor histidine kinase, putative	no	phosphorelay sensor kinase activity [GO:0000155]; protein dimerization activity [GO:0046983]	Modulator/Scaffolding/Adaptor	membrane/cell wall
Q2FX98	Q2FX98_C87	NHUAYPNHAPTSDIYWNNIETR	-0.15637	-0.475495	-0.252587	-0.718331	-0.364041	SAOUHSC_01979	Uncharacterized protein	yes	sequence-specific DNA binding [GO:0043565]	Gene expression and Nucleic acid binding
Q2FXA3	Q2FXA3_C55	YSLFDITHQPELUAYVTHLPVDNYHTDAAILYK	-0.0458633	-0.0495465	0.191184	0.0749164	0.0145266	hemE	Uroporphyrinogen decarboxylase	no	uroporphyrinogen decarboxylase activity [GO:0004853]	Enzyme
Q2FXA4	Q2FXA4_C259	NFIYTPVGFVUEHLEVLYDNDYECK		0.0406821	0.0176369	-0.487884	0.0176369	hemH	Ferrochelatase	no	ferrochelatase activity [GO:0004325]; metal ion binding [GO:0046872]	Enzyme								Metall binding	Functional site
Q2FXA4	Q2FXA4_C272	NFIYTPVGFVCEHLEVLYDNDYEUK	-0.412443	0.178874	0.072586	0.0769695	0.0747778	hemH	Ferrochelatase	no	ferrochelatase activity [GO:0004325]; metal ion binding [GO:0046872]	Enzyme
Q2FXA4	Q2FXA4_C276	VVUDDIGANYYRPK	-0.351608	0.0399806	-0.179204	-0.147857	-0.163531	hemH	Ferrochelatase	no	ferrochelatase activity [GO:0004325]; metal ion binding [GO:0046872]	Enzyme
Q2FXA5	Q2FXA5_C343	TSDTDITAUTWTSK	0.0229897	0.073508	0.189457	0.0794066	0.0764573	SAOUHSC_01960	Protoporphyrinogen oxidase	no	oxygen-dependent protoporphyrinogen oxidase activity [GO:0004729]	Enzyme
Q2FXA5	Q2FXA5_C451	VTGASFEAVGLPDUITQGK	-0.0781219	0.364348	0.254836	0.517931	0.309592	SAOUHSC_01960	Protoporphyrinogen oxidase	no	oxygen-dependent protoporphyrinogen oxidase activity [GO:0004729]	Enzyme
Q2FXA8	Q2FXA8_C124	SKHNLLQULIFVNDMYLLSNPK						SAOUHSC_01957	Uncharacterized protein	no	0	not assigned
Q2FXB7	Q2FXB7_C50	IIUGILQQDSGEIK	-0.441027	-0.254651	-0.465002	-0.238527	-0.347839	SAOUHSC_01948	ABC transporter domain protein	no	ATPase activity [GO:0016887]; ATP binding [GO:0005524]	not assigned
Q2FXB7	Q2FXB7_C98	IVULNESVDFSEINSVLSLVNLNVDKK	-0.183638	0.0154976	-0.0280574	-0.12688	-0.0774686	SAOUHSC_01948	ABC transporter domain protein	no	ATPase activity [GO:0016887]; ATP binding [GO:0005524]	not assigned
Q2FXD1	Q2FXD1_C119	TAINSIVETHANLNQHVUIIR	-0.383078	-0.365407	0.42707	0.214374	-0.0755166	SAOUHSC_01932	Type I restriction-modification enzyme, S subunit, EcoA family, putative	no	DNA binding [GO:0003677]	Gene expression and Nucleic acid binding
Q2FXD1	Q2FXD1_C350	LTHANLUNINLK	-0.318164	-0.125353	0.303342		-0.125353	SAOUHSC_01932	Type I restriction-modification enzyme, S subunit, EcoA family, putative	no	DNA binding [GO:0003677]	Gene expression and Nucleic acid binding
Q2FXD1	Q2FXD1_C358	IPULTEQDKVSALLK	-0.256907	-0.208394	-0.426645	-0.033732	-0.232651	SAOUHSC_01932	Type I restriction-modification enzyme, S subunit, EcoA family, putative	no	DNA binding [GO:0003677]	Gene expression and Nucleic acid binding
Q2FXD2	Q2FXD2_C1307	LLEFDNEULLIKK	-0.500953	0.0550568	0.354452	0.520347	0.204754	SAOUHSC_01931	Uncharacterized protein	no	0	not assigned
Q2FXD2	Q2FXD2_C82	IIIQVTATUK	0.593306	0.270828			0.432067	SAOUHSC_01931	Uncharacterized protein	no	0	not assigned
Q2FXE1	Q2FXE1_C105	ENLVYUDLIEHLILHAIITK	0.763327	0.62882	0.819259		0.763327	SAOUHSC_01922	Uncharacterized protein	no	0	not assigned
Q2FXE1	Q2FXE1_C70	ASEGLYUHHISEDKFQNLSDLR	0.348686	0.392757		0.297837	0.348686	SAOUHSC_01922	Uncharacterized protein	no	0	not assigned
Q2FXE2	Q2FXE2_C28	VENDENUMESVK	-0.438542	0.125254	-0.104418	-0.263698	-0.184058	SAOUHSC_01907	Uncharacterized protein	no	oxidoreductase activity [GO:0016491]	Enzyme
Q2FXE8	Q2FXE8_C179	LLWASUR	-0.252415	-0.395986	-0.620823	-0.377913	-0.386949	SAOUHSC_01901	Transaldolase	no	aldehyde-lyase activity [GO:0016832]; sedoheptulose-7-phosphate:D-glyceraldehyde-3-phosphate glyceronetransferase activity [GO:0004801]	Enzyme
Q2FXE8	Q2FXE8_C198	ELFNVIQADEIGADIITUPADVVK	0.0109138	0.0897	-0.123135	0.00819246	0.00955314	SAOUHSC_01901	Transaldolase	no	aldehyde-lyase activity [GO:0016832]; sedoheptulose-7-phosphate:D-glyceraldehyde-3-phosphate glyceronetransferase activity [GO:0004801]	Enzyme
Q2FXF5	Q2FXF5_C10	TIYFIUTGNSCR	-0.324076	0.303109	0.333767	0.510759	0.318438	arsC	Arsenate reductase	no	arsenate reductase (thioredoxin) activity [GO:0030612]; protein tyrosine phosphatase activity [GO:0004725]	Enzyme			Active site						Functional site
Q2FXF5	Q2FXF5_C15	TIYFICTGNSUR	-2.54246	-1.57523	0.0935602		-1.57523	arsC	Arsenate reductase	no	arsenate reductase (thioredoxin) activity [GO:0030612]; protein tyrosine phosphatase activity [GO:0004725]	Enzyme			Active site						Functional site
Q2FXF5	Q2FXF5_C82	NSNLVVTLUSDADVNCPSLPTNVK	-0.0692551	-0.106529	0.183963	-0.198328	-0.0878921	arsC	Arsenate reductase	no	arsenate reductase (thioredoxin) activity [GO:0030612]; protein tyrosine phosphatase activity [GO:0004725]	Enzyme			Active site						Functional site
Q2FXF5	Q2FXF5_C89	NSNLVVTLCSDADVNUPSLPTNVKK						arsC	Arsenate reductase	no	arsenate reductase (thioredoxin) activity [GO:0030612]; protein tyrosine phosphatase activity [GO:0004725]	Enzyme			Active site						Functional site
Q2FXF9	Q2FXF9_C107	AHGIEVEUVDDER	-0.545392	0.0382335	-0.235144	0.00822904	-0.113458	SAOUHSC_01889	Riboflavin biosynthesis protein RibD	no	5-amino-6-(5-phosphoribosylamino)uracil reductase activity [GO:0008703]; diaminohydroxyphosphoribosylaminopyrimidine deaminase activity [GO:0008835]; NADP binding [GO:0050661]; zinc ion binding [GO:0008270]	Enzyme
Q2FXF9	Q2FXF9_C245	SUDLTTILHNLYK	0.0346158	-0.0524897	-0.112589	-0.0492479	-0.0508688	SAOUHSC_01889	Riboflavin biosynthesis protein RibD	no	5-amino-6-(5-phosphoribosylamino)uracil reductase activity [GO:0008703]; diaminohydroxyphosphoribosylaminopyrimidine deaminase activity [GO:0008835]; NADP binding [GO:0050661]; zinc ion binding [GO:0008270]	Enzyme
Q2FXG0	Q2FXG0_C124	IITIQUSQHINNQLVK	-0.140539	-0.128882	-0.106684		-0.128882	SAOUHSC_01888	Riboflavin synthase, alpha subunit	no	riboflavin synthase activity [GO:0004746]	Enzyme
Q2FXG1	Q2FXG1_C162	PAGVIUEIMNDDGTMAK	-0.205031	-0.117005	-0.0666993	-0.0352391	-0.0918521	ribBA	Riboflavin biosynthesis protein RibBA	no	3,4-dihydroxy-2-butanone-4-phosphate synthase activity [GO:0008686]; GTP binding [GO:0005525]; GTP cyclohydrolase II activity [GO:0003935]; magnesium ion binding [GO:0000287]; manganese ion binding [GO:0030145]; zinc ion binding [GO:0008270]	Enzyme				Binding site			Site		Functional site
Q2FXG1	Q2FXG1_C254	LHSAULTGDIFHSQR	-0.211832	-0.349916	0.021764	-0.0725889	-0.142211	ribBA	Riboflavin biosynthesis protein RibBA	no	3,4-dihydroxy-2-butanone-4-phosphate synthase activity [GO:0008686]; GTP binding [GO:0005525]; GTP cyclohydrolase II activity [GO:0003935]; magnesium ion binding [GO:0000287]; manganese ion binding [GO:0030145]; zinc ion binding [GO:0008270]	Enzyme						Nucleotide binding		Metall binding	Functional site
Q2FXG1	Q2FXG1_C267	CDUGAQLESSMK	-0.0479647	-0.11143	0.139208	0.0169241	-0.0155203	ribBA	Riboflavin biosynthesis protein RibBA	no	3,4-dihydroxy-2-butanone-4-phosphate synthase activity [GO:0008686]; GTP binding [GO:0005525]; GTP cyclohydrolase II activity [GO:0003935]; magnesium ion binding [GO:0000287]; manganese ion binding [GO:0030145]; zinc ion binding [GO:0008270]	Enzyme				Binding site				Metall binding	Functional site
Q2FXG1	Q2FXG1_C57	GLIUAPVSK	-0.31937	-0.191771	-0.291663	-0.150929	-0.241717	ribBA	Riboflavin biosynthesis protein RibBA	no	3,4-dihydroxy-2-butanone-4-phosphate synthase activity [GO:0008686]; GTP binding [GO:0005525]; GTP cyclohydrolase II activity [GO:0003935]; magnesium ion binding [GO:0000287]; manganese ion binding [GO:0030145]; zinc ion binding [GO:0008270]	Enzyme
Q2FXG2	Q2FXG2_C79	LASSGNYDAVITLGUVIR	-0.254026	-0.221596	-0.389091	-0.118709	-0.237811	ribH	6,7-dimethyl-8-ribityllumazine synthase	no	6,7-dimethyl-8-ribityllumazine synthase activity [GO:0000906]	Enzyme
Q2FXG2	Q2FXG2_C92	GATSHYDYVUNEVAK	-0.235977	-0.217273	-0.396384	-0.192431	-0.226625	ribH	6,7-dimethyl-8-ribityllumazine synthase	no	6,7-dimethyl-8-ribityllumazine synthase activity [GO:0000906]	Enzyme			Active site						Functional site
Q2FXG9	Q2FXG9_C181	NHAPFIUAIEK			0.0418037	-0.22164	-0.0899182	SAOUHSC_01878	Uncharacterized protein	no	0	not assigned
Q2FXH2	Q2FXH2_C159	GLAYVDEVAVNWUPALGTVLSNEEVIDGVSER	-0.0893748	-0.114925	-0.23489	-0.0516085	-0.10215	leuS	Leucine--tRNA ligase	yes	aminoacyl-tRNA editing activity [GO:0002161]; ATP binding [GO:0005524]; leucine-tRNA ligase activity [GO:0004823]	Gene expression and Nucleic acid binding
Q2FXH2	Q2FXH2_C498	ETNTMPQWAGSUWYYLR	0.0369388	-0.134421	0.541911	-0.348383	-0.0487413	leuS	Leucine--tRNA ligase	yes	aminoacyl-tRNA editing activity [GO:0002161]; ATP binding [GO:0005524]; leucine-tRNA ligase activity [GO:0004823]	Gene expression and Nucleic acid binding
Q2FXH3	Q2FXH3_C63	NEIYYIVUAGGVR	-0.5527	0.186742	-0.0225401	-0.121502	-0.0720209	SAOUHSC_01874	Uncharacterized protein	no	0	not assigned
Q2FXH9	Q2FXH9_C155	IHMIIGTDEESDWKUTDR	-0.122052	-0.174915	0.16092	0.0684645	-0.0267936	SAOUHSC_01868	Putative dipeptidase SAOUHSC_01868	no	dipeptidase activity [GO:0016805]; metallopeptidase activity [GO:0008237]; zinc ion binding [GO:0008270]	Enzyme								Metall binding	Functional site
Q2FXH9	Q2FXH9_C178	TEEMPTLGFAPDAEFPUIHGEK	-0.346224	-0.0805079	-0.176657	0.132202	-0.128583	SAOUHSC_01868	Putative dipeptidase SAOUHSC_01868	no	dipeptidase activity [GO:0016805]; metallopeptidase activity [GO:0008237]; zinc ion binding [GO:0008270]	Enzyme								Metall binding	Functional site
Q2FXH9	Q2FXH9_C83	GNDVLGILUHVDVVPAGDGWDSNPFEPVVTEDAIIAR	-0.239685	-0.641244	-0.179662		-0.239685	SAOUHSC_01868	Putative dipeptidase SAOUHSC_01868	no	dipeptidase activity [GO:0016805]; metallopeptidase activity [GO:0008237]; zinc ion binding [GO:0008270]	Enzyme			Active site					Metall binding	Functional site
Q2FXI0	Q2FXI0_C143	WLRUDIK			-0.356716	-0.198957	-0.277837	SAOUHSC_01867	D-alanine aminotransferase	no	D-alanine:2-oxoglutarate aminotransferase activity [GO:0047810]; pyridoxal phosphate binding [GO:0030170]	Enzyme
Q2FXI2	Q2FXI2_C93	IIUNDAIELNEYFK	-0.234975	0.0140747	-0.363006	0.14741	-0.11045	trmB	tRNA (guanine-N(7)-)-methyltransferase	no	tRNA (guanine-N7-)-methyltransferase activity [GO:0008176]	Gene expression and Nucleic acid binding				Binding site					Functional site
Q2FXI5	Q2FXI5_C317	ANIGIPTAVIGVUAR	-0.453478	-0.00830493		-0.229535	-0.229535	SAOUHSC_01861	Uncharacterized protein	no	aminopeptidase activity [GO:0004177]; metal ion binding [GO:0046872]	Enzyme								Metall binding	Functional site
Q2FXI5	Q2FXI5_C345	SLLSEAIUNLDNNQIETLQYK	-0.0953117	-0.285495	0.275245	-0.323985	-0.190403	SAOUHSC_01861	Uncharacterized protein	no	aminopeptidase activity [GO:0004177]; metal ion binding [GO:0046872]	Enzyme
Q2FXI6	Q2FXI6_C27	QGATVFEFTAGWUPDCR						SAOUHSC_01860	Uncharacterized protein	no	oxidoreductase activity, acting on a sulfur group of donors, disulfide as acceptor [GO:0016671]; protein disulfide oxidoreductase activity [GO:0015035]; protein-disulfide reductase activity [GO:0047134]; thioredoxin-disulfide reductase activity [GO:0004791]	Enzyme
Q2FXI6	Q2FXI6_C30	QGATVFEFTAGWCPDUR	-0.415326	-0.326643	-0.245318	-0.0329052	-0.28598	SAOUHSC_01860	Uncharacterized protein	no	oxidoreductase activity, acting on a sulfur group of donors, disulfide as acceptor [GO:0016671]; protein disulfide oxidoreductase activity [GO:0015035]; protein-disulfide reductase activity [GO:0047134]; thioredoxin-disulfide reductase activity [GO:0004791]	Enzyme
Q2FXI7	Q2FXI7_C197	ILNTAFLNEIEAQUQGEMLVAVPHQDVLIIADIR	-0.186442	-0.0218337	0.0427844	0.0124972	-0.00466825	SAOUHSC_01859	UPF0354 protein SAOUHSC_01859	no	0	not assigned
Q2FXI8	Q2FXI8_C126	LSVLNVNVGNDTLQIVUGAPNVEAGQK	-0.281625	-0.196813	-0.199261	0.105663	-0.198037	SAOUHSC_01858	Phenylalanine--tRNA ligase beta subunit	no	ATP binding [GO:0005524]; metal ion binding [GO:0046872]; phenylalanine-tRNA ligase activity [GO:0004826]; tRNA binding [GO:0000049]	Gene expression and Nucleic acid binding
Q2FXI8	Q2FXI8_C167	GVASSGMIUSMK	0.0234889	-0.153784	-0.124629	0.0201896	-0.0522196	SAOUHSC_01858	Phenylalanine--tRNA ligase beta subunit	no	ATP binding [GO:0005524]; metal ion binding [GO:0046872]; phenylalanine-tRNA ligase activity [GO:0004826]; tRNA binding [GO:0000049]	Gene expression and Nucleic acid binding
Q2FXI9	Q2FXI9_C1097	AUGIHMLVATQRPSVNVITGLIK	-0.128424	-0.12455		-0.0841197	-0.12455	SAOUHSC_01857	Uncharacterized protein	no	ATP binding [GO:0005524]; DNA binding [GO:0003677]	Gene expression and Nucleic acid binding
Q2FXI9	Q2FXI9_C974	SVUINSILMSLLYK	-0.150625	-0.0913408	0.00705194	0.121546	-0.0421444	SAOUHSC_01857	Uncharacterized protein	no	ATP binding [GO:0005524]; DNA binding [GO:0003677]	Gene expression and Nucleic acid binding						Nucleotide binding			Functional site
Q2FXJ0	Q2FXJ0_C152	TSFLIGDGTGMGLPESDYFAFEAUEYR	0.374296	0.642143	0.85214	0.916782	0.747142	murC	UDP-N-acetylmuramate--L-alanine ligase	yes	ATP binding [GO:0005524]; UDP-N-acetylmuramate-L-alanine ligase activity [GO:0008763]	Enzyme
Q2FXJ0	Q2FXJ0_C368	VFLUEIFGSIR	-0.377884	-0.028758	-0.485346	-0.153286	-0.265585	murC	UDP-N-acetylmuramate--L-alanine ligase	yes	ATP binding [GO:0005524]; UDP-N-acetylmuramate-L-alanine ligase activity [GO:0008763]	Enzyme
Q2FXJ5	Q2FXJ5_C37	EQVTLYUGADPTADSLHIGHLLPFLTLR	-0.115269	-0.0360229	-0.012359	0.0575542	-0.0241909	tyrS	Tyrosine--tRNA ligase	yes	ATP binding [GO:0005524]; RNA binding [GO:0003723]; tyrosine-tRNA ligase activity [GO:0004831]	Gene expression and Nucleic acid binding				Binding site					Functional site
Q2FXJ7	Q2FXJ7_C38	YVVTUTHESYNEVIMLGMALYPNQIHYMAK	-0.360972	-0.223424	0.14496	0.117961	-0.0527317	SAOUHSC_01837	1-acyl-sn-glycerol-3-phosphate acyltransferases domain protein	yes	1-acylglycerol-3-phosphate O-acyltransferase activity [GO:0003841]; acylglycerol O-acyltransferase activity [GO:0016411]; lysophosphatidic acid acyltransferase activity [GO:0042171]	Enzyme	membrane/cell wall
Q2FXJ8	Q2FXJ8_C434	YHQHAIQILEGLGGQENIVNLTNUATR		0.211386		-0.565481	-0.177048	SAOUHSC_01836	Uncharacterized protein	no	kinase activity [GO:0016301]; N-acetylglucosamine transmembrane transporter activity [GO:0015572]; protein-N(PI)-phosphohistidine-sugar phosphotransferase activity [GO:0008982]	Receptor/Transporter/Channel	membrane/cell wall		Active site						Functional site
Q2FXK3	Q2FXK3_C127	LITIADNNUMISNAVR						SAOUHSC_01831	Uncharacterized protein	no	0	not assigned
Q2FXK3	Q2FXK3_C85	FTDISIEQQSIGTAULNNGK	-0.145366		0.0869196	0.396708	0.0869196	SAOUHSC_01831	Uncharacterized protein	no	0	not assigned
Q2FXK4	Q2FXK4_C129	SPNLYPEIEUK	-0.31874	0.141564	-0.132167	0.0551957	-0.0384856	SAOUHSC_01830	Uncharacterized protein	no	glycerophosphodiester phosphodiesterase activity [GO:0008889]	Enzyme
Q2FXK4	Q2FXK4_C154	KVDATQVVIQSFDIEUIEK	-0.275682	-0.0373843		0.211261	-0.0373843	SAOUHSC_01830	Uncharacterized protein	no	glycerophosphodiester phosphodiesterase activity [GO:0008889]	Enzyme
Q2FXK4	Q2FXK4_C171	LNTLGSIYELGVLUSK	-0.0641179	-0.122758	-0.0217311	0.0802483	-0.0429245	SAOUHSC_01830	Uncharacterized protein	no	glycerophosphodiester phosphodiesterase activity [GO:0008889]	Enzyme
Q2FXK7	Q2FXK7_C102	TQIVADVHQFEGHIAUDANSK	-0.162832	-0.0630776	0.133724	-0.00458061	-0.0338291	SAOUHSC_01828	GAF domain protein	no	0	not assigned
Q2FXK7	Q2FXK7_C78	GVUGTAVSER	-0.149073	-0.0696184	0.100709	0.104739	0.0155451	SAOUHSC_01828	GAF domain protein	no	0	not assigned
Q2FXK8	Q2FXK8_C145	DNDELYDKUK	-0.163284	-0.252707	-0.107865	-0.0463846	-0.135575	ezrA	Septation ring formation regulator EzrA	yes	0	not assigned	membrane/cell wall
Q2FXL1	Q2FXL1_C344	EIGTFETSIQPFEDUCTIFTPK	0.00352897	0.145149	0.166201		0.145149	thiI	Probable tRNA sulfurtransferase	no	ATP binding [GO:0005524]; sulfurtransferase activity [GO:0016783]; tRNA adenylyltransferase activity [GO:0004810]; tRNA binding [GO:0000049]	Enzyme
Q2FXL3	Q2FXL3_C60	LISVVPSIDTGVUDQQTR	-1.76372	-1.40003	-1.6676	-1.61879	-1.6432	tpx	Thiol peroxidase	no	thioredoxin peroxidase activity [GO:0008379]	Enzyme			Active site						Functional site
Q2FXL3	Q2FXL3_C93	WUASAGLDNVITLSDHR	-1.53232	-1.18768	-1.56974	-1.58203	-1.55103	tpx	Thiol peroxidase	no	thioredoxin peroxidase activity [GO:0008379]	Enzyme
Q2FXL5	Q2FXL5_C206	IISUHIGNGASIAAIDGGK	-0.34529	-0.277621	-0.287149	-0.105691	-0.282385	ackA	Acetate kinase	no	acetate kinase activity [GO:0008776]; ATP binding [GO:0005524]; metal ion binding [GO:0046872]	Enzyme						Nucleotide binding			Functional site
Q2FXL6	Q2FXL6_C137	HAPUDVLVVR	-0.24607	-0.218386	-0.143564	-0.0909659	-0.180975	SAOUHSC_01819	Putative universal stress protein SAOUHSC_01819	no	0	not assigned
Q2FXL9	Q2FXL9_C149	AAELADKUIEIGVSYLK	-0.300217	0.1153	-0.50863	-0.100143	-0.20018	SAOUHSC_01816	Uncharacterized peptidase SAOUHSC_01816	no	hydrolase activity [GO:0016787]; metal ion binding [GO:0046872]	not assigned
Q2FXL9	Q2FXL9_C164	EGVTEUEVVNHIEQTIK	-0.223896	0.148088	0.120617	0.0184917	0.0695546	SAOUHSC_01816	Uncharacterized peptidase SAOUHSC_01816	no	hydrolase activity [GO:0016787]; metal ion binding [GO:0046872]	not assigned
Q2FXL9	Q2FXL9_C224	SNEYVLFDLGVIYEHYUSDMTR	-0.207869	0.0059005	-0.251006	0.0394434	-0.100984	SAOUHSC_01816	Uncharacterized peptidase SAOUHSC_01816	no	hydrolase activity [GO:0016787]; metal ion binding [GO:0046872]	not assigned								Metall binding	Functional site
Q2FXL9	Q2FXL9_C56	QVLFUPK	-0.216422	0.0241956	-0.0057389	-0.170118	-0.0879284	SAOUHSC_01816	Uncharacterized peptidase SAOUHSC_01816	no	hydrolase activity [GO:0016787]; metal ion binding [GO:0046872]	not assigned
Q2FXM5	Q2FXM5_C214	NMVMUDSR	-0.258132	-0.0176361	-0.0204429	-0.0172418	-0.0190395	SAOUHSC_01810	NADP-dependent malic enzyme, putative	no	malate dehydrogenase (decarboxylating) (NAD+) activity [GO:0004471]; metal ion binding [GO:0046872]; NAD binding [GO:0051287]	Enzyme
Q2FXM5	Q2FXM5_C362	AAVEAIADLIDSSELNEDYUIPGPFDK	-0.33368	-0.127746	-0.0822007	-0.156489	-0.142118	SAOUHSC_01810	NADP-dependent malic enzyme, putative	no	malate dehydrogenase (decarboxylating) (NAD+) activity [GO:0004471]; metal ion binding [GO:0046872]; NAD binding [GO:0051287]	Enzyme
Q2FXM5	Q2FXM5_C44	VTNKEELSLAYSPGVAEPUK	-0.27638	-0.405431	-0.389052	0.00115369	-0.332716	SAOUHSC_01810	NADP-dependent malic enzyme, putative	no	malate dehydrogenase (decarboxylating) (NAD+) activity [GO:0004471]; metal ion binding [GO:0046872]; NAD binding [GO:0051287]	Enzyme
Q2FXM6	Q2FXM6_C52	ELAENLNVUFNCDHHIALTAYK	-0.0103273	0.0140648	0.645382	0.0835934	0.0488291	accD	Acetyl-coenzyme A carboxylase carboxyl transferase subunit beta	yes	acetyl-CoA carboxylase activity [GO:0003989]; ATP binding [GO:0005524]; metal ion binding [GO:0046872]	Enzyme								Metall binding	Functional site
Q2FXM6	Q2FXM6_C55	ELAENLNVCFNUDHHIALTAYK		-0.610301	-0.199703	-0.150385	-0.199703	accD	Acetyl-coenzyme A carboxylase carboxyl transferase subunit beta	yes	acetyl-CoA carboxylase activity [GO:0003989]; ATP binding [GO:0005524]; metal ion binding [GO:0046872]	Enzyme								Metall binding	Functional site
Q2FXM8	Q2FXM8_C175	DUGDLALWAGLSVGAETIVVPEVK	-0.297999	-0.221489	-0.0921249	-0.122413	-0.171951	pfkA	ATP-dependent 6-phosphofructokinase	yes	6-phosphofructokinase activity [GO:0003872]; ATP binding [GO:0005524]; metal ion binding [GO:0046872]	Enzyme
Q2FXM8	Q2FXM8_C226	HSIVLVAEGUMTAQDCQK	-0.0490987	-0.198328	-0.054602	-0.0671063	-0.0608542	pfkA	ATP-dependent 6-phosphofructokinase	yes	6-phosphofructokinase activity [GO:0003872]; ATP binding [GO:0005524]; metal ion binding [GO:0046872]	Enzyme				Binding site					Functional site
Q2FXM8	Q2FXM8_C232	HSIVLVAEGCMTAQDUQK	-0.156418	-0.0770938	0.100621	-0.053329	-0.0652114	pfkA	ATP-dependent 6-phosphofructokinase	yes	6-phosphofructokinase activity [GO:0003872]; ATP binding [GO:0005524]; metal ion binding [GO:0046872]	Enzyme
Q2FXM9	Q2FXM9_C144	EVKUDILNSGELK	-0.202161	0.0421506	-0.0113974	0.00398176	-0.00370781	pyk	Pyruvate kinase	yes	ATP binding [GO:0005524]; kinase activity [GO:0016301]; magnesium ion binding [GO:0000287]; potassium ion binding [GO:0030955]; pyruvate kinase activity [GO:0004743]	Enzyme
Q2FXM9	Q2FXM9_C266	QUNKLGK	-0.398132		0.0647449	0.174279	0.0647449	pyk	Pyruvate kinase	yes	ATP binding [GO:0005524]; kinase activity [GO:0016301]; magnesium ion binding [GO:0000287]; potassium ion binding [GO:0030955]; pyruvate kinase activity [GO:0004743]	Enzyme
Q2FXM9	Q2FXM9_C410	QUSIVWGVQPVVK	-0.0223435	0.0537558	0.159262	0.237812	0.106509	pyk	Pyruvate kinase	yes	ATP binding [GO:0005524]; kinase activity [GO:0016301]; magnesium ion binding [GO:0000287]; potassium ion binding [GO:0030955]; pyruvate kinase activity [GO:0004743]	Enzyme
Q2FXM9	Q2FXM9_C8	IVUTIGPASESEEMIEK	-0.138656	-0.0561285	0.19479	0.0129483	-0.0215901	pyk	Pyruvate kinase	yes	ATP binding [GO:0005524]; kinase activity [GO:0016301]; magnesium ion binding [GO:0000287]; potassium ion binding [GO:0030955]; pyruvate kinase activity [GO:0004743]	Enzyme
Q2FXN3	Q2FXN3_C230	GLIPNVDFYSASVYHUMEIPHDLFTPIFAVSR	-0.0388509	-0.0124899	0.0743684	-0.104465	-0.0256704	SAOUHSC_01802	Uncharacterized protein	no	transferase activity, transferring acyl groups, acyl groups converted into alkyl on transfer [GO:0046912]	Enzyme
Q2FXN4	Q2FXN4_C117	QELDLFTULR	-0.0465634	0.042084	-0.105116	0.0694272	-0.00223972	SAOUHSC_01801	Isocitrate dehydrogenase [NADP]	no	isocitrate dehydrogenase (NADP+) activity [GO:0004450]; magnesium ion binding [GO:0000287]; NAD binding [GO:0051287]	Enzyme
Q2FXN6	Q2FXN6_C65	DGIDVUK	-0.0910422	-0.0238628	-0.130593	-0.139408	-0.110818	SAOUHSC_01800	Two-component response regulator, putative	no	DNA binding [GO:0003677]	Gene expression and Nucleic acid binding
Q2FXP0	Q2FXP0_C285	NSHYUPVCQK	-0.472409	0.0378742	0.41738	-0.0596453	-0.0108856	SAOUHSC_01796	Formamidopyrimidine-DNA glycosylase	no	class I DNA-(apurinic or apyrimidinic site) endonuclease activity [GO:0140078]; damaged DNA binding [GO:0003684]; oxidized purine nucleobase lesion DNA N-glycosylase activity [GO:0008534]; zinc ion binding [GO:0008270]	Gene expression and Nucleic acid binding
Q2FXP0	Q2FXP0_C288	NSHYCPVUQK	-0.730703	-0.318938	-0.326407	-0.156386	-0.322673	SAOUHSC_01796	Formamidopyrimidine-DNA glycosylase	no	class I DNA-(apurinic or apyrimidinic site) endonuclease activity [GO:0140078]; damaged DNA binding [GO:0003684]; oxidized purine nucleobase lesion DNA N-glycosylase activity [GO:0008534]; zinc ion binding [GO:0008270]	Gene expression and Nucleic acid binding
Q2FXP2	Q2FXP2_C153	GVNDNQLDIEAFDIFSNASUTTNCIGPVAK	0.205518	0.0473988	0.622368	0.496616	0.351067	SAOUHSC_01794	Glyceraldehyde-3-phosphate dehydrogenase	no	NAD binding [GO:0051287]; NADP binding [GO:0050661]; oxidoreductase activity, acting on the aldehyde or oxo group of donors, NAD or NADP as acceptor [GO:0016620]	Enzyme			Active site						Functional site
Q2FXP2	Q2FXP2_C202	SUNESIIPTSTGAAK	0.00662118	0.141825	0.200464	0.24949	0.171144	SAOUHSC_01794	Glyceraldehyde-3-phosphate dehydrogenase	no	NAD binding [GO:0051287]; NADP binding [GO:0050661]; oxidoreductase activity, acting on the aldehyde or oxo group of donors, NAD or NADP as acceptor [GO:0016620]	Enzyme
Q2FXP3	Q2FXP3_C31	EUENCGTR	-0.633166	-0.130997		-0.490456	-0.490456	nrdR	Transcriptional repressor NrdR	no	ATP binding [GO:0005524]; DNA binding [GO:0003677]; zinc ion binding [GO:0008270]	Gene expression and Nucleic acid binding
Q2FXP3	Q2FXP3_C74	SUEKRPVR	-0.593572	-0.145095	0.0824301	0.272979	-0.0313323	nrdR	Transcriptional repressor NrdR	no	ATP binding [GO:0005524]; DNA binding [GO:0003677]; zinc ion binding [GO:0008270]	Gene expression and Nucleic acid binding
Q2FXP5	Q2FXP5_C148	LDVAMAADDIUTAITNGEQVK	-0.322612	-0.141828	-0.0663216	0.119401	-0.104075	SAOUHSC_01791	Uncharacterized protein	yes	ATP binding [GO:0005524]; DNA replication origin binding [GO:0003688]	Gene expression and Nucleic acid binding	membrane/cell wall
Q2FXP5	Q2FXP5_C72	FADUPNFVK	-0.652465	0.0336722	0.157313	-0.0691303	-0.017729	SAOUHSC_01791	Uncharacterized protein	yes	ATP binding [GO:0005524]; DNA replication origin binding [GO:0003688]	Gene expression and Nucleic acid binding	membrane/cell wall
Q2FXP5	Q2FXP5_C97	YLQUPCK	-0.141478	0.277747	0.60027	0.120086	0.198917	SAOUHSC_01791	Uncharacterized protein	yes	ATP binding [GO:0005524]; DNA replication origin binding [GO:0003688]	Gene expression and Nucleic acid binding	membrane/cell wall
Q2FXP5	Q2FXP5_C99	YLQCPUK	-0.500483	-0.15748	0.0662614	-0.260359	-0.208919	SAOUHSC_01791	Uncharacterized protein	yes	ATP binding [GO:0005524]; DNA replication origin binding [GO:0003688]	Gene expression and Nucleic acid binding	membrane/cell wall
Q2FXP7	Q2FXP7_C336	PMNUPHHMMIYANKPHSYR	-0.00517412	-0.49928	-0.286639		-0.286639	thrS	Threonine--tRNA ligase	yes	ATP binding [GO:0005524]; metal ion binding [GO:0046872]; threonine-tRNA ligase activity [GO:0004829]; tRNA binding [GO:0000049]	Gene expression and Nucleic acid binding								Metall binding	Functional site
Q2FXP9	Q2FXP9_C120	FLTKGDKUK	-0.0205599	0.0213391	-0.00481378	0.0105999	0.00289305	infC	Translation initiation factor IF-3	yes	ribosome binding [GO:0043022]; translation initiation factor activity [GO:0003743]	Modulator/Scaffolding/Adaptor	membrane/cell wall
Q2FXP9	Q2FXP9_C148	VLEKYADEUK	-0.490357	-0.247337	-0.174182	-0.327391	-0.287364	infC	Translation initiation factor IF-3	yes	ribosome binding [GO:0043022]; translation initiation factor activity [GO:0003743]	Modulator/Scaffolding/Adaptor	membrane/cell wall
Q2FXQ3	Q2FXQ3_C66	QLISYULLENEHGEILVYER	-0.284001	-0.114269	-0.165839	-0.0474577	-0.140054	SAOUHSC_01782	Uncharacterized protein	yes	hydrolase activity [GO:0016787]	not assigned
Q2FXQ4	Q2FXQ4_C197	FANUTQELTIEK	-0.259841	-0.0226981	-0.241697	-0.0127665	-0.132197	SAOUHSC_01781	Uncharacterized protein	no	0	not assigned
Q2FXQ4	Q2FXQ4_C279	WINAYEUYFK	0.306262	-0.345363	-0.387619		-0.345363	SAOUHSC_01781	Uncharacterized protein	no	0	not assigned
Q2FXQ7	Q2FXQ7_C16	CSFUGKDQDQVKK	-0.440655	-0.595315	-0.315397	-0.429693	-0.435174	clpX	ATP-dependent Clp protease ATP-binding subunit ClpX	no	ATP binding [GO:0005524]; ATP-dependent peptidase activity [GO:0004176]; protein dimerization activity [GO:0046983]; unfolded protein binding [GO:0051082]; zinc ion binding [GO:0008270]	Enzyme
Q2FXQ8	Q2FXQ8_C143	HFDIPTLVIUTK	-0.338214	-0.0893349	-0.228216	0.0427844	-0.158775	engB	Probable GTP-binding protein EngB	yes	GTP binding [GO:0005525]; metal ion binding [GO:0046872]	not assigned						Nucleotide binding			Functional site
Q2FXR3	Q2FXR3_C242	EGUDMMIVKPALSYLDIVR	-0.212739	-0.126099	0.0461779	-0.0741441	-0.100122	hemB	Delta-aminolevulinic acid dehydratase	no	porphobilinogen synthase activity [GO:0004655]; zinc ion binding [GO:0008270]	Enzyme
Q2FXR3	Q2FXR3_C319	AGADMIITYFAKDIUR						hemB	Delta-aminolevulinic acid dehydratase	no	porphobilinogen synthase activity [GO:0004655]; zinc ion binding [GO:0008270]	Enzyme
Q2FXR4	Q2FXR4_C143	FEGUYHGHSDSLLIK	-0.25429	-0.199725	-0.128314	-0.0851141	-0.16402	hemL1	Glutamate-1-semialdehyde 2,1-aminomutase 1	no	glutamate-1-semialdehyde 2,1-aminomutase activity [GO:0042286]; pyridoxal phosphate binding [GO:0030170]; transaminase activity [GO:0008483]	Enzyme
Q2FXR4	Q2FXR4_C251	VGYHUAQGYFGVTPDLTCLGK	-0.160073	-0.152933	-0.0524012	-0.155952	-0.154442	hemL1	Glutamate-1-semialdehyde 2,1-aminomutase 1	no	glutamate-1-semialdehyde 2,1-aminomutase activity [GO:0042286]; pyridoxal phosphate binding [GO:0030170]; transaminase activity [GO:0008483]	Enzyme
Q2FXR4	Q2FXR4_C264	VGYHCAQGYFGVTPDLTULGK		-0.0563112	-0.09068	-0.155952	-0.09068	hemL1	Glutamate-1-semialdehyde 2,1-aminomutase 1	no	glutamate-1-semialdehyde 2,1-aminomutase activity [GO:0042286]; pyridoxal phosphate binding [GO:0030170]; transaminase activity [GO:0008483]	Enzyme
Q2FXR7	Q2FXR7_C4	MNEUAFGTK	0.115361	0.0156653	0.286485	0.108864	0.112113	SAOUHSC_01768	Uncharacterized protein	no	DNA-3-methyladenine glycosylase activity [GO:0008725]	Gene expression and Nucleic acid binding
Q2FXR8	Q2FXR8_C317	YEGMDRFDUR	-0.0711332	-0.0647666	-0.238204	-0.107555	-0.0893439	valS	Valine--tRNA ligase	yes	aminoacyl-tRNA editing activity [GO:0002161]; ATP binding [GO:0005524]; valine-tRNA ligase activity [GO:0004832]	Gene expression and Nucleic acid binding
Q2FXR8	Q2FXR8_C774	FUNPSTLNISTDVEIPEK	0.898557	0.956577			0.927567	valS	Valine--tRNA ligase	yes	aminoacyl-tRNA editing activity [GO:0002161]; ATP binding [GO:0005524]; valine-tRNA ligase activity [GO:0004832]	Gene expression and Nucleic acid binding
Q2FXT1	Q2FXT1_C413	GUKNGDIVR	-0.0537033	-0.454506	-0.131361	-0.227793	-0.179577	obg	GTPase Obg	yes	GTPase activity [GO:0003924]; GTP binding [GO:0005525]; magnesium ion binding [GO:0000287]	not assigned
Q2FXT4	Q2FXT4_C269	MMNUIIK	-0.093879	0.0742314	0.0791562	0.0318186	0.053025	ruvB	Holliday junction ATP-dependent DNA helicase RuvB	yes	ATP binding [GO:0005524]; DNA binding [GO:0003677]; four-way junction helicase activity [GO:0009378]	Gene expression and Nucleic acid binding
Q2FXT5	Q2FXT5_C119	IIAEUIK	-0.544088	-0.453369	-0.367025	-0.0797988	-0.410197	queA	S-adenosylmethionine:tRNA ribosyltransferase-isomerase	no	S-adenosylmethionine:tRNA ribosyltransferase-isomerase activity [GO:0051075]	Gene expression and Nucleic acid binding
Q2FXT6	Q2FXT6_C12	TUKQSGAR		-0.33774	0.183582	-0.0741828	-0.0741828	tgt	Queuine tRNA-ribosyltransferase	no	metal ion binding [GO:0046872]; queuine tRNA-ribosyltransferase activity [GO:0008479]	Gene expression and Nucleic acid binding
Q2FXT6	Q2FXT6_C150	SMQIQNDLGSDIMMAFDEUPPMPAEYDYVK						tgt	Queuine tRNA-ribosyltransferase	no	metal ion binding [GO:0046872]; queuine tRNA-ribosyltransferase activity [GO:0008479]	Gene expression and Nucleic acid binding				Binding site					Functional site
Q2FXT6	Q2FXT6_C259	YLMGVGSPDALIEUSIR	-0.333771	-0.142624	-0.00805827	-0.203435	-0.17303	tgt	Queuine tRNA-ribosyltransferase	no	metal ion binding [GO:0046872]; queuine tRNA-ribosyltransferase activity [GO:0008479]	Gene expression and Nucleic acid binding
Q2FXT6	Q2FXT6_C269	GMDMFDUVLPTR	0.0429244	0.140517	0.439464	0.380619	0.260568	tgt	Queuine tRNA-ribosyltransferase	no	metal ion binding [GO:0046872]; queuine tRNA-ribosyltransferase activity [GO:0008479]	Gene expression and Nucleic acid binding			Active site						Functional site
Q2FXT6	Q2FXT6_C281	NGTUMTSQGR	-0.112397	0.0173518	0.388906	0.178237	0.0977942	tgt	Queuine tRNA-ribosyltransferase	no	metal ion binding [GO:0046872]; queuine tRNA-ribosyltransferase activity [GO:0008479]	Gene expression and Nucleic acid binding
Q2FXT6	Q2FXT6_C306	FADDLRPLDENUDCYTCQNYSR						tgt	Queuine tRNA-ribosyltransferase	no	metal ion binding [GO:0046872]; queuine tRNA-ribosyltransferase activity [GO:0008479]	Gene expression and Nucleic acid binding								Metall binding	Functional site
Q2FXT6	Q2FXT6_C311	FADDLRPLDENCDCYTUQNYSR	-0.158848	-0.491389	0.696973	0.324811	0.0829813	tgt	Queuine tRNA-ribosyltransferase	no	metal ion binding [GO:0046872]; queuine tRNA-ribosyltransferase activity [GO:0008479]	Gene expression and Nucleic acid binding								Metall binding	Functional site
Q2FXT9	Q2FXT9_C251	VLNDQUPTSVK	-0.403523		-0.196674		-0.300098	SAOUHSC_01744	Uncharacterized protein	no	5'-3' exonuclease activity [GO:0008409]; nucleic acid binding [GO:0003676]	Gene expression and Nucleic acid binding
Q2FXT9	Q2FXT9_C680	EGMLLUQHLSVKPDTLK	-0.192233	0.331017	0.666393	1.16736	0.498705	SAOUHSC_01744	Uncharacterized protein	no	5'-3' exonuclease activity [GO:0008409]; nucleic acid binding [GO:0003676]	Gene expression and Nucleic acid binding
Q2FXU0	Q2FXU0_C64	GFIIGUPVAYSMGIGFAPVR	-0.0938046	-0.0256604	0.106781	0.124911	0.0405604	apt	Adenine phosphoribosyltransferase	no	adenine phosphoribosyltransferase activity [GO:0003999]	Enzyme
Q2FXU1	Q2FXU1_C278	VIVNSINDUYAILGLVHTLWK	0.0332292	-0.0687859			-0.0177784	SAOUHSC_01742	GTP pyrophosphokinase	yes	GTP diphosphokinase activity [GO:0008728]; guanosine-3',5'-bis(diphosphate) 3'-diphosphatase activity [GO:0008893]; kinase activity [GO:0016301]	Enzyme	membrane/cell wall
Q2FXU1	Q2FXU1_C602	CUNPIPGDDIVGYITK	-0.289863	-0.0044793	0.110497	-0.233227	-0.118853	SAOUHSC_01742	GTP pyrophosphokinase	yes	GTP diphosphokinase activity [GO:0008728]; guanosine-3',5'-bis(diphosphate) 3'-diphosphatase activity [GO:0008893]; kinase activity [GO:0016301]	Enzyme	membrane/cell wall
Q2FXU1	Q2FXU1_C627	TDUPNIK	-0.39056	0.060638	0.139195	0.0211012	0.0408696	SAOUHSC_01742	GTP pyrophosphokinase	yes	GTP diphosphokinase activity [GO:0008728]; guanosine-3',5'-bis(diphosphate) 3'-diphosphatase activity [GO:0008893]; kinase activity [GO:0016301]	Enzyme	membrane/cell wall
Q2FXU2	Q2FXU2_C27	GYULLVGIGQNSTEQDADVIAK	-0.573402	-0.0542874		-0.411598	-0.411598	dtd	D-aminoacyl-tRNA deacylase	yes	aminoacyl-tRNA editing activity [GO:0002161]; D-tyrosyl-tRNA(Tyr) deacylase activity [GO:0051500]; tRNA binding [GO:0000049]	Gene expression and Nucleic acid binding
Q2FXU4	Q2FXU4_C191	HFEPVIHEFUSDCQSR			0.564525	-0.573402	-0.00443898	hisS	Histidine--tRNA ligase	yes	ATP binding [GO:0005524]; histidine-tRNA ligase activity [GO:0004821]	Gene expression and Nucleic acid binding
Q2FXU4	Q2FXU4_C194	HFEPVIHEFCSDUQSR	-1.04561	-0.131313	0.564525		-0.131313	hisS	Histidine--tRNA ligase	yes	ATP binding [GO:0005524]; histidine-tRNA ligase activity [GO:0004821]	Gene expression and Nucleic acid binding
Q2FXU4	Q2FXU4_C208	ILDUKVDR	-0.768359	0.158466	0.370264	-0.0480583	0.055204	hisS	Histidine--tRNA ligase	yes	ATP binding [GO:0005524]; histidine-tRNA ligase activity [GO:0004821]	Gene expression and Nucleic acid binding
Q2FXU4	Q2FXU4_C284	GLDYYTHTAFELMMDNPNYDGAITTLUGGGR	-0.291274	0.0017302	-0.308251	-0.0150534	-0.153164	hisS	Histidine--tRNA ligase	yes	ATP binding [GO:0005524]; histidine-tRNA ligase activity [GO:0004821]	Gene expression and Nucleic acid binding
Q2FXU5	Q2FXU5_C565	TASATULLTNAPSEVSDKQLEELSLR	0.0462815	0.165687	0.237564	0.311852	0.201625	aspS	Aspartate--tRNA ligase	yes	aspartate-tRNA ligase activity [GO:0004815]; ATP binding [GO:0005524]; nucleic acid binding [GO:0003676]	Gene expression and Nucleic acid binding
Q2FXU5	Q2FXU5_C8	TTYUGLVTEAFLGQEITLK	-0.148289	-0.057707	0.160017	-0.0444342	-0.0510706	aspS	Aspartate--tRNA ligase	yes	aspartate-tRNA ligase activity [GO:0004815]; ATP binding [GO:0005524]; nucleic acid binding [GO:0003676]	Gene expression and Nucleic acid binding
Q2FXU7	Q2FXU7_C135	VHLMKEULDR	-0.385036	-0.0553364	-0.358583	-0.118617	-0.2386	SAOUHSC_01735	Uncharacterized protein	no	tRNA threonylcarbamoyladenosine dehydratase [GO:0061503]; ubiquitin-like modifier activating enzyme activity [GO:0008641]	Enzyme
Q2FXU7	Q2FXU7_C92	LINPDUK	-0.108245	-0.0158326	0.0120728	0.0947516	-0.00187991	SAOUHSC_01735	Uncharacterized protein	no	tRNA threonylcarbamoyladenosine dehydratase [GO:0061503]; ubiquitin-like modifier activating enzyme activity [GO:0008641]	Enzyme
Q2FXU8	Q2FXU8_C317	IPLSQAVIELULSPK	-0.112085	-0.432902	-0.462555	0.176067	-0.272494	SAOUHSC_01734	Uncharacterized protein	no	ATP binding [GO:0005524]; DNA binding [GO:0003677]	Gene expression and Nucleic acid binding
Q2FXV0	Q2FXV0_C25	EGQGUISLK	-0.23978	-0.145732	-0.180941	0.0142601	-0.163337	SAOUHSC_01732	Uncharacterized protein	no	DNA binding [GO:0003677]	Gene expression and Nucleic acid binding
Q2FXV6	Q2FXV6_C102	TPNPDVMUNK	0.497941	0.601195	0.772392	0.743644	0.67242	mnmA	tRNA-specific 2-thiouridylase MnmA	yes	ATP binding [GO:0005524]; sulfurtransferase activity [GO:0016783]; tRNA binding [GO:0000049]	Enzyme			Active site						Functional site
Q2FXV6	Q2FXV6_C199	DSTGIUFIGEK	0.373759	0.575079	0.593971	0.541885	0.558482	mnmA	tRNA-specific 2-thiouridylase MnmA	yes	ATP binding [GO:0005524]; sulfurtransferase activity [GO:0016783]; tRNA binding [GO:0000049]	Enzyme			Active site						Functional site
Q2FXV8	Q2FXV8_C236	AALLYTLEEEUIK	-0.17249	0.177471	-0.0576169	-0.161815	-0.109716	recD2	ATP-dependent RecD-like DNA helicase	no	ATP binding [GO:0005524]; ATP-dependent 5'-3' DNA helicase activity [GO:0043141]; DNA binding [GO:0003677]	Gene expression and Nucleic acid binding
Q2FXV8	Q2FXV8_C543	SFINUQANQIPTVVEK	0.0330882			-0.0301477	0.00147021	recD2	ATP-dependent RecD-like DNA helicase	no	ATP binding [GO:0005524]; ATP-dependent 5'-3' DNA helicase activity [GO:0043141]; DNA binding [GO:0003677]	Gene expression and Nucleic acid binding
Q2FXV8	Q2FXV8_C675	QDMMELTHAYUTSIHK	-0.334444	-0.0621133	0.241962	-0.318812	-0.190462	recD2	ATP-dependent RecD-like DNA helicase	no	ATP binding [GO:0005524]; ATP-dependent 5'-3' DNA helicase activity [GO:0043141]; DNA binding [GO:0003677]	Gene expression and Nucleic acid binding
Q2FXV9	Q2FXV9_C667	VVNMAPFSIELUGGIHVR	-0.158236	0.078883	0.116232	-0.014281	0.032301	alaS	Alanine--tRNA ligase	yes	alanine-tRNA ligase activity [GO:0004813]; amino acid binding [GO:0016597]; ATP binding [GO:0005524]; metal ion binding [GO:0046872]; tRNA binding [GO:0000049]	Gene expression and Nucleic acid binding								Metall binding	Functional site
Q2FXW9	Q2FXW9_C234	IATVUKFDLPK	-0.0480542	-0.137759	-0.233295	-0.195996	-0.166877	SAOUHSC_01711	Uncharacterized protein	no	0	not assigned
Q2FXX1	Q2FXX1_C228	DUSVQRK	-0.105531	-0.0203601	0.103734	0.156447	0.0416868	SAOUHSC_01709	Acetyl-CoA carboxylase, biotin carboxylase, putative	no	acetyl-CoA carboxylase activity [GO:0003989]; ATP binding [GO:0005524]; metal ion binding [GO:0046872]	Enzyme
Q2FXX1	Q2FXX1_C243	LIEESPUAALTEER	0.0923275	0.164759	0.0783734	0.146547	0.119437	SAOUHSC_01709	Acetyl-CoA carboxylase, biotin carboxylase, putative	no	acetyl-CoA carboxylase activity [GO:0003989]; ATP binding [GO:0005524]; metal ion binding [GO:0046872]	Enzyme
Q2FXX1	Q2FXX1_C255	QQIUNDAVK	-0.257703	-0.0298121	-0.171559	0.1333	-0.100686	SAOUHSC_01709	Acetyl-CoA carboxylase, biotin carboxylase, putative	no	acetyl-CoA carboxylase activity [GO:0003989]; ATP binding [GO:0005524]; metal ion binding [GO:0046872]	Enzyme
Q2FXX1	Q2FXX1_C49	GDEQSLHVHLADQAIUIGEANALDSYLNIDR	-0.0968537	-0.111617	0.115699	0.234869	0.00942271	SAOUHSC_01709	Acetyl-CoA carboxylase, biotin carboxylase, putative	no	acetyl-CoA carboxylase activity [GO:0003989]; ATP binding [GO:0005524]; metal ion binding [GO:0046872]	Enzyme
Q2FXX2	Q2FXX2_C221	EVTLQADTIUVHGDGEHALLFVSK	-0.279701	-0.200889	-0.0756854	-0.0177529	-0.138287	SAOUHSC_01708	UPF0271 protein SAOUHSC_01708	no	catalytic activity [GO:0003824]	Enzyme
Q2FXX2	Q2FXX2_C98	RNIDISNDEIYNLMIYQLGALQGFUR	-0.278951	0.0455828	-0.081797	0.113167	-0.0181071	SAOUHSC_01708	UPF0271 protein SAOUHSC_01708	no	catalytic activity [GO:0003824]	Enzyme
Q2FXY0	Q2FXY0_C10	CIGUGAPLQSEDKNKPGFVPEHNMFR						SAOUHSC_01700	Uncharacterized protein	yes	GTPase activity [GO:0003924]; GTP binding [GO:0005525]	not assigned
Q2FXY0	Q2FXY0_C277	RPLVUFFSNDLNIHR	-0.432266	-0.203867	0.0868658	-0.0272104	-0.115539	SAOUHSC_01700	Uncharacterized protein	yes	GTPase activity [GO:0003924]; GTP binding [GO:0005525]	not assigned
Q2FXY5	Q2FXY5_C299	HYQLDELLNIIDAUAETDYK	0.0689111	-0.143771			-0.0374301	SAOUHSC_01690	Uncharacterized protein	yes	DNA binding [GO:0003677]; DNA-directed DNA polymerase activity [GO:0003887]	Gene expression and Nucleic acid binding
Q2FXY7	Q2FXY7_C306	MNPMVYUGLFPIDNK	-0.0547494	0.0275787	0.0825664	0.453544	0.0550725	lepA	Elongation factor 4	no	GTPase activity [GO:0003924]; GTP binding [GO:0005525]	not assigned	membrane/cell wall
Q2FXY7	Q2FXY7_C383	EFGIELIATAPSVIYQUVLR	-0.181503	-0.103816	-0.01583	-0.0914832	-0.0976498	lepA	Elongation factor 4	no	GTPase activity [GO:0003924]; GTP binding [GO:0005525]	not assigned	membrane/cell wall
Q2FXY7	Q2FXY7_C431	ATMMVPNDYVGAVMELUQR	-0.376133	0.075738	-0.25379	-0.0979496	-0.17587	lepA	Elongation factor 4	no	GTPase activity [GO:0003924]; GTP binding [GO:0005525]	not assigned	membrane/cell wall
Q2FXY9	Q2FXY9_C13	TVQSAYIHIPFUVR						SAOUHSC_01686	Oxygen-independent coproporphyrinogen-III oxidase-like protein	no	4 iron, 4 sulfur cluster binding [GO:0051539]; coproporphyrinogen oxidase activity [GO:0004109]; metal ion binding [GO:0046872]	Enzyme
Q2FXZ2	Q2FXZ2_C15	IIGIDLGTTNSUVTVLEGDEPK	-0.391504	-0.0633899	-0.189991	-0.0963462	-0.143169	dnaK	Chaperone protein DnaK	yes	ATP binding [GO:0005524]; unfolded protein binding [GO:0051082]	Modulator/Scaffolding/Adaptor
Q2FXZ3	Q2FXZ3_C149	DVTUETCHGDGAKPGTSK	-0.208411	-0.227456	-0.0719822		-0.208411	dnaJ	Chaperone protein DnaJ	yes	ATP binding [GO:0005524]; heat shock protein binding [GO:0031072]; metal ion binding [GO:0046872]; unfolded protein binding [GO:0051082]	Modulator/Scaffolding/Adaptor								Metall binding	Functional site
Q2FXZ4	Q2FXZ4_C143	EADEELUIELDPGMAFGTGDHPTTSMCLK						prmA	Ribosomal protein L11 methyltransferase	no	protein methyltransferase activity [GO:0008276]	Enzyme
Q2FXZ4	Q2FXZ4_C304	IISEQHDNGWVULVGQK	-1.13492		-0.852068		-0.993494	prmA	Ribosomal protein L11 methyltransferase	no	protein methyltransferase activity [GO:0008276]	Enzyme
Q2FXZ5	Q2FXZ5_C51	IILTFNDQTVYLUEIADITSDKIEVDLKEK	-0.498403		-0.778383	0.841893	-0.498403	SAOUHSC_01680	Ribosomal RNA small subunit methyltransferase E	no	rRNA (uridine-N3-)-methyltransferase activity [GO:0070042]	Gene expression and Nucleic acid binding
Q2FXZ5	Q2FXZ5_C82	QNINTELPVDVTIUSGLIK			-0.26734	-1.29085	-0.779095	SAOUHSC_01680	Ribosomal RNA small subunit methyltransferase E	no	rRNA (uridine-N3-)-methyltransferase activity [GO:0070042]	Gene expression and Nucleic acid binding
Q2FXZ6	Q2FXZ6_C11	STVAFHTLGUK	0.606158	0.780478	0.452806	0.207143	0.529482	SAOUHSC_01679	Uncharacterized protein	no	4 iron, 4 sulfur cluster binding [GO:0051539]; N6-threonylcarbomyladenosine methylthiotransferase activity [GO:0035598]	Enzyme
Q2FXZ6	Q2FXZ6_C47	VDFEANADVFVINTUTVTNTGDKK	0.332164	0.428035		1.29031	0.428035	SAOUHSC_01679	Uncharacterized protein	no	4 iron, 4 sulfur cluster binding [GO:0051539]; N6-threonylcarbomyladenosine methylthiotransferase activity [GO:0035598]	Enzyme
Q2FXZ8	Q2FXZ8_C191	TAQTVTDLRPAGIIFUENER	-0.304603	-0.114505	-0.0494005	0.0496634	-0.0819528	SAOUHSC_01677	Uncharacterized protein	no	0	not assigned	membrane/cell wall
Q2FY02	Q2FY02_C95	VLGDIIIUTDVAQEQANNYGHSFER	-0.306181	-0.111789	-0.114644	0.0250288	-0.113216	ybeY	Endoribonuclease YbeY	yes	endonuclease activity [GO:0004519]; metal ion binding [GO:0046872]; metalloendopeptidase activity [GO:0004222]	Enzyme
Q2FY04	Q2FY04_C100	ELUDDDMPVYMTNHK	-0.0512198	-0.353727	0.0211954		-0.0512198	SAOUHSC_01670	Cytidine deaminase	no	cytidine deaminase activity [GO:0004126]; zinc ion binding [GO:0008270]	Enzyme
Q2FY04	Q2FY04_C54	TFYGTNVENASYPLSIUAER	-0.391796	-0.211281	-0.267462	-0.247457	-0.257459	SAOUHSC_01670	Cytidine deaminase	no	cytidine deaminase activity [GO:0004126]; zinc ion binding [GO:0008270]	Enzyme
Q2FY04	Q2FY04_C89	ASLVSAISQGYRPGDFESITVTVDADKPSSPUGACR	-0.683252	0.136454	-0.226054	-0.11491	-0.170482	SAOUHSC_01670	Cytidine deaminase	no	cytidine deaminase activity [GO:0004126]; zinc ion binding [GO:0008270]	Enzyme
Q2FY04	Q2FY04_C92	ASLVSAISQGYRPGDFESITVTVDADKPSSPCGAUR	0.0370307	0.136454	0.329525	0.225522	0.180988	SAOUHSC_01670	Cytidine deaminase	no	cytidine deaminase activity [GO:0004126]; zinc ion binding [GO:0008270]	Enzyme
Q2FY08	Q2FY08_C137	IIDDEGIVUPVSK	0.464039	0.489486	0.432695	0.33404	0.448367	glyQS	Glycine--tRNA ligase	yes	ATP binding [GO:0005524]; glycine-tRNA ligase activity [GO:0004820]; protein dimerization activity [GO:0046983]	Modulator/Scaffolding/Adaptor
Q2FY08	Q2FY08_C230	EFEQMELEFFUKPGEEIEWQNYWK	0.00377674	-0.0565024	-0.117876	-0.200839	-0.0871892	glyQS	Glycine--tRNA ligase	yes	ATP binding [GO:0005524]; glycine-tRNA ligase activity [GO:0004820]; protein dimerization activity [GO:0046983]	Modulator/Scaffolding/Adaptor
Q2FY08	Q2FY08_C328	YIPYUIEPSLGADR	-0.135237	-0.0410905	-0.0406297	0.0938704	-0.0408601	glyQS	Glycine--tRNA ligase	yes	ATP binding [GO:0005524]; glycine-tRNA ligase activity [GO:0004820]; protein dimerization activity [GO:0046983]	Modulator/Scaffolding/Adaptor
Q2FY08	Q2FY08_C344	VTLAFLUDAYDEEGVEGSK	-0.210673	-0.137442	-0.0183826	0.0239513	-0.0779124	glyQS	Glycine--tRNA ligase	yes	ATP binding [GO:0005524]; glycine-tRNA ligase activity [GO:0004820]; protein dimerization activity [GO:0046983]	Modulator/Scaffolding/Adaptor
Q2FY08	Q2FY08_C422	QDEIGTPYUVTFDFDSLEDNQVTVR	-0.10578	-0.121418	-0.0614689	-0.026881	-0.0836245	glyQS	Glycine--tRNA ligase	yes	ATP binding [GO:0005524]; glycine-tRNA ligase activity [GO:0004820]; protein dimerization activity [GO:0046983]	Modulator/Scaffolding/Adaptor
Q2FY10	Q2FY10_C245	IQEELNYFEEIVSEIGUPVIDVSQK	0.0997665	0.16543	0.384713	0.353775	0.259602	SAOUHSC_01664	Putative pyruvate, phosphate dikinase regulatory protein	no	ATP binding [GO:0005524]; protein serine/threonine kinase activity [GO:0004674]	Enzyme
Q2FY10	Q2FY10_C33	QUKNELLR	-1.24325	-0.68701			-0.96513	SAOUHSC_01664	Putative pyruvate, phosphate dikinase regulatory protein	no	ATP binding [GO:0005524]; protein serine/threonine kinase activity [GO:0004674]	Enzyme
Q2FY11	Q2FY11_C38	NYIGLUPFHDEK	-0.0966994	-0.0915252	0.0618453		-0.0915252	dnaG	DNA primase	yes	ATP binding [GO:0005524]; DNA binding [GO:0003677]; DNA helicase activity [GO:0003678]; DNA primase activity [GO:0003896]; zinc ion binding [GO:0008270]	Gene expression and Nucleic acid binding
Q2FY14	Q2FY14_C164	LSENGLAQEGNYEYUFFESEGR	0.0441843	-0.0262932	-0.0792341	0.181039	0.00894552	SAOUHSC_01660	GTP cyclohydrolase 1 type 2 homolog	no	metal ion binding [GO:0046872]	not assigned
Q2FY15	Q2FY15_C120	QRUNAQPQLIIGTPTR			0.00848689	-0.215731	-0.103622	cshB	DEAD-box ATP-dependent RNA helicase CshB	no	ATP binding [GO:0005524]; ATP-dependent RNA helicase activity [GO:0004004]; RNA binding [GO:0003723]	Gene expression and Nucleic acid binding
Q2FY15	Q2FY15_C250	TLNLIDILNPYLCIIFUNSR	-0.0353426	-0.209945	0.0462815	-0.256959	-0.122644	cshB	DEAD-box ATP-dependent RNA helicase CshB	no	ATP binding [GO:0005524]; ATP-dependent RNA helicase activity [GO:0004004]; RNA binding [GO:0003723]	Gene expression and Nucleic acid binding
Q2FY16	Q2FY16_C176	LSVUFDTCHTHDAGYNVK	0.0241783	0.107956	0.174378		0.107956	nfo	Probable endonuclease 4	no	deoxyribonuclease IV (phage-T4-induced) activity [GO:0008833]; DNA-(apurinic or apyrimidinic site) endonuclease activity [GO:0003906]; DNA binding [GO:0003677]; phosphoric diester hydrolase activity [GO:0008081]; zinc ion binding [GO:0008270]	Gene expression and Nucleic acid binding								Metall binding	Functional site
Q2FY16	Q2FY16_C180	LSVCFDTUHTHDAGYNVK		0.0694272		-0.168252	-0.0494126	nfo	Probable endonuclease 4	no	deoxyribonuclease IV (phage-T4-induced) activity [GO:0008833]; DNA-(apurinic or apyrimidinic site) endonuclease activity [GO:0003906]; DNA binding [GO:0003677]; phosphoric diester hydrolase activity [GO:0008081]; zinc ion binding [GO:0008270]	Gene expression and Nucleic acid binding								Metall binding	Functional site
Q2FY19	Q2FY19_C106	VIDYUPIDQIK	-0.245899	0.129217	-0.0497705	0.131589	0.0397233	fur	Ferric uptake regulation protein	no	DNA binding [GO:0003677]; DNA binding transcription factor activity [GO:0003700]; metal ion binding [GO:0046872]	Gene expression and Nucleic acid binding								Metall binding	Functional site
Q2FY19	Q2FY19_C131	HKLEVYGVUESCQD	-0.298744	0.0311128			-0.133815	fur	Ferric uptake regulation protein	no	DNA binding [GO:0003677]; DNA binding transcription factor activity [GO:0003700]; metal ion binding [GO:0046872]	Gene expression and Nucleic acid binding
Q2FY19	Q2FY19_C84	IAUTNHHHHHFICEK	-0.423739	-0.149921	0.013498		-0.149921	fur	Ferric uptake regulation protein	no	DNA binding [GO:0003677]; DNA binding transcription factor activity [GO:0003700]; metal ion binding [GO:0046872]	Gene expression and Nucleic acid binding								Metall binding	Functional site
Q2FY19	Q2FY19_C94	IACTNHHHHHFIUEK						fur	Ferric uptake regulation protein	no	DNA binding [GO:0003677]; DNA binding transcription factor activity [GO:0003700]; metal ion binding [GO:0046872]	Gene expression and Nucleic acid binding								Metall binding	Functional site
Q2FY22	Q2FY22_C36	FUSRENK			0.131985	0.000721167	0.0663528	rpmG2	50S ribosomal protein L33 2	no	structural constituent of ribosome [GO:0003735]	Modulator/Scaffolding/Adaptor
Q2FY27	Q2FY27_C108	EIFEQFVDUPVYVDNDANIAALGEK	-0.340258	-0.204466	-0.102264	-0.0937559	-0.153365	SAOUHSC_01646	Glucokinase, putative	no	glucokinase activity [GO:0004340]	Enzyme
Q2FY27	Q2FY27_C15	IILAADVGGTTUK	-0.23295	0.0893353	-0.116978	0.0262702	-0.0453539	SAOUHSC_01646	Glucokinase, putative	no	glucokinase activity [GO:0004340]	Enzyme
Q2FY27	Q2FY27_C178	FKUNCGR	0.0683269	-0.0586082	0.0322419	-0.00701409	0.0126139	SAOUHSC_01646	Glucokinase, putative	no	glucokinase activity [GO:0004340]	Enzyme
Q2FY27	Q2FY27_C180	FKCNUGR	-0.424184	-0.146819		-0.112085	-0.146819	SAOUHSC_01646	Glucokinase, putative	no	glucokinase activity [GO:0004340]	Enzyme
Q2FY27	Q2FY27_C185	SGUIETVASATGVVNLVNFYYPK	-0.227979	-0.572179	-0.0889144	-0.290198	-0.259088	SAOUHSC_01646	Glucokinase, putative	no	glucokinase activity [GO:0004340]	Enzyme
Q2FY27	Q2FY27_C237	AGDQFUIFITEK	-0.268765	-0.0597505	-0.027675	-0.0162785	-0.0437128	SAOUHSC_01646	Glucokinase, putative	no	glucokinase activity [GO:0004340]	Enzyme
Q2FY27	Q2FY27_C252	VANYIGYLUSIISVTSNPK	-0.555269	-0.0956816	-0.283527	-0.0495764	-0.189604	SAOUHSC_01646	Glucokinase, putative	no	glucokinase activity [GO:0004340]	Enzyme
Q2FY32	Q2FY32_C53	LTIPEIFUK	0.351061	0.163544	0.506328	0.345927	0.348494	aroK	Shikimate kinase	no	ATP binding [GO:0005524]; magnesium ion binding [GO:0000287]; shikimate kinase activity [GO:0004765]	Enzyme
Q2FY33	Q2FY33_C203	LFGANVILSQSGYTGEDGFEIYUNIDDTEK	-0.33743	-0.0867831	-0.0693762	0.151989	-0.0780797	gcvT	Aminomethyltransferase	no	aminomethyltransferase activity [GO:0004047]; transaminase activity [GO:0008483]	Enzyme
Q2FY33	Q2FY33_C223	IWDGLLEYNVMPUGLGAR	-0.0658987	-0.039088	0.133037	0.0159257	-0.0115812	gcvT	Aminomethyltransferase	no	aminomethyltransferase activity [GO:0004047]; transaminase activity [GO:0008483]	Enzyme
Q2FY33	Q2FY33_C91	ALYTALUNEEGGIIDDLVIYK	-0.445382	-0.263231	-0.483723	-0.24607	-0.354306	gcvT	Aminomethyltransferase	no	aminomethyltransferase activity [GO:0004047]; transaminase activity [GO:0008483]	Enzyme
Q2FY34	Q2FY34_C330	ATSNIUSNQALNALASSIAMSALGK	-0.204433	-0.12477	-0.0372363	0.0565835	-0.0810033	gcvPA	Probable glycine dehydrogenase (decarboxylating) subunit 1	no	glycine dehydrogenase (decarboxylating) activity [GO:0004375]	Enzyme
Q2FY35	Q2FY35_C379	HFEIPYKQYUK	-0.568709	-0.509389	-0.470589	-0.426263	-0.489989	gcvPB	Probable glycine dehydrogenase (decarboxylating) subunit 2	no	glycine dehydrogenase (decarboxylating) activity [GO:0004375]	Enzyme
Q2FY35	Q2FY35_C80	NFGVDNGFYPLGSUTMK	-0.298618	-0.270942	-0.123793	-0.294181	-0.282562	gcvPB	Probable glycine dehydrogenase (decarboxylating) subunit 2	no	glycine dehydrogenase (decarboxylating) activity [GO:0004375]	Enzyme
Q2FY36	Q2FY36_C88	DQPVYLUDANGIASYR	-0.0400667	0.186501	0.119024	0.0437644	0.0813943	SAOUHSC_01630	Uncharacterized protein	no	0	not assigned	membrane/cell wall
Q2FY37	Q2FY37_C149	SSVUFDAPSWYELVVEGR	0.280481	0.300651	0.339251	0.339251	0.319951	lipM	Octanoyltransferase LipM	no	lipoyl(octanoyl) transferase activity [GO:0033819]; octanoyl transferase activity (acting on glycine-cleavage complex H protein) [GO:0102555]	Enzyme			Active site						Functional site
Q2FY40	Q2FY40_C220	IIEKGDMITLDFGAYYNGYUSDITR						SAOUHSC_01626	Proline dipeptidase, putative	no	metal ion binding [GO:0046872]; proline dipeptidase activity [GO:0102009]	Enzyme
Q2FY40	Q2FY40_C311	LQVNNUVTVEPGVYIEGLGGIR	-0.324831	-0.245986	-0.0529075	0.00508468	-0.149447	SAOUHSC_01626	Proline dipeptidase, putative	no	metal ion binding [GO:0046872]; proline dipeptidase activity [GO:0102009]	Enzyme
Q2FY40	Q2FY40_C339	IEDDILITENGUQVFTK	-0.321964	-0.304826	-0.0650231	-0.0826828	-0.193754	SAOUHSC_01626	Proline dipeptidase, putative	no	metal ion binding [GO:0046872]; proline dipeptidase activity [GO:0102009]	Enzyme
Q2FY43	Q2FY43_C228	HIEIQIVGDSYGNVIHLGERDUTIQR	0.356126	0.213332	-0.116332	0.179384	0.196358	SAOUHSC_01623	Acetyl-CoA carboxylase, biotin carboxylase	yes	acetyl-CoA carboxylase activity [GO:0003989]; ATP binding [GO:0005524]; metal ion binding [GO:0046872]	Enzyme
Q2FY43	Q2FY43_C49	DLGIQTVAIYSEGDKDALHTQIADEAYUVGPTLSK	0.0433445	-0.0670318		0.224905	0.0433445	SAOUHSC_01623	Acetyl-CoA carboxylase, biotin carboxylase	yes	acetyl-CoA carboxylase activity [GO:0003989]; ATP binding [GO:0005524]; metal ion binding [GO:0046872]	Enzyme
Q2FY44	Q2FY44_C75	EDGIYIDVYUALK	-0.135222	-0.270834	-0.164496	-0.0727407	-0.149859	SAOUHSC_01622	Uncharacterized protein	no	0	not assigned
Q2FY46	Q2FY46_C123	LTEEGUFDK	-0.466716	0.25689	-0.505144		-0.466716	xseA	Exodeoxyribonuclease 7 large subunit	no	exodeoxyribonuclease VII activity [GO:0008855]; nucleic acid binding [GO:0003676]	Gene expression and Nucleic acid binding
Q2FY47	Q2FY47_C46	LSAAUDTTLK	-0.0635901	-0.525891	-0.314768	0.102994	-0.189179	xseB	Exodeoxyribonuclease 7 small subunit	no	exodeoxyribonuclease VII activity [GO:0008855]	Gene expression and Nucleic acid binding
Q2FY50	Q2FY50_C489	DIAEYIQVIUISHLPQVASMSDHHLLISK		0.685357	-0.457375	-0.511979	-0.457375	SAOUHSC_01615	DNA repair protein RecN	no	ATP binding [GO:0005524]	not assigned
Q2FY51	Q2FY51_C318	LSTSGHILTNEFQQTEDKHIYAAGDUIGK						SAOUHSC_01614	Dihydrolipoyl dehydrogenase	no	dihydrolipoyl dehydrogenase activity [GO:0004148]; electron transfer activity [GO:0009055]; flavin adenine dinucleotide binding [GO:0050660]	Enzyme
Q2FY51	Q2FY51_C43	QLLGGTULHK						SAOUHSC_01614	Dihydrolipoyl dehydrogenase	no	dihydrolipoyl dehydrogenase activity [GO:0004148]; electron transfer activity [GO:0009055]; flavin adenine dinucleotide binding [GO:0050660]	Enzyme
Q2FY52	Q2FY52_C175	LPFVUVIINNK	-0.363141	-0.0707241	-0.079478	-0.0702847	-0.075101	SAOUHSC_01613	2-oxoisovalerate dehydrogenase, E1 component, alpha subunit, putative	no	3-methyl-2-oxobutanoate dehydrogenase (2-methylpropanoyl-transferring) activity [GO:0003863]; alpha-ketoacid dehydrogenase activity [GO:0003826]	Enzyme
Q2FY52	Q2FY52_C271	KADUNEK	-0.340806	0.015783	0.251204	0.140648	0.0782154	SAOUHSC_01613	2-oxoisovalerate dehydrogenase, E1 component, alpha subunit, putative	no	3-methyl-2-oxobutanoate dehydrogenase (2-methylpropanoyl-transferring) activity [GO:0003863]; alpha-ketoacid dehydrogenase activity [GO:0003826]	Enzyme
Q2FY53	Q2FY53_C111	SNNDWQUPLTIR	0.0496355	0.343736	0.647809	0.760295	0.495772	SAOUHSC_01612	2-oxoisovalerate dehydrogenase, E1 component, beta subunit, putative	no	pyruvate dehydrogenase (acetyl-transferring) activity [GO:0004739]	Enzyme
Q2FY54	Q2FY54_C389	NMVNLUISIDHR	-0.131977	-0.102976	-0.0459973	-0.323083	-0.117477	SAOUHSC_01611	Dihydrolipoamide acetyltransferase component of pyruvate dehydrogenase complex	no	transferase activity, transferring acyl groups [GO:0016746]	Enzyme
Q2FY55	Q2FY55_C142	HQIEGHDVMNVINQLQTLFNKYUEER	0.831067		0.0071955	0.147307	0.147307	SAOUHSC_01610	UPF0403 protein SAOUHSC_01610	no	0	not assigned
Q2FY55	Q2FY55_C52	QDGTTLVMINSVUGCAGGIAR	0.0798389	0.0253123	0.483201		0.0798389	SAOUHSC_01610	UPF0403 protein SAOUHSC_01610	no	0	not assigned
Q2FY55	Q2FY55_C54	QDGTTLVMINSVCGUAGGIAR	-0.00416324	-0.0642261	0.432153	0.339019	0.167428	SAOUHSC_01610	UPF0403 protein SAOUHSC_01610	no	0	not assigned
Q2FY59	Q2FY59_C60	LGANNLVUTMNSTIEEGEVPK	-0.219404	-0.0384359	0.0833836	0.144307	0.0224738	SAOUHSC_01606	Peptidase T, putative	no	aminopeptidase activity [GO:0004177]; metal ion binding [GO:0046872]; metallopeptidase activity [GO:0008237]	Enzyme
Q2FY60	Q2FY60_C168	DGASUVTYIGPNGAGHYVK	-0.292402	-0.182884	-0.169975	-0.0340725	-0.176429	SAOUHSC_01605	6-phosphogluconate dehydrogenase, decarboxylating	yes	phosphogluconate dehydrogenase (decarboxylating) activity [GO:0004616]	Enzyme
Q2FY60	Q2FY60_C330	IUSYAQGFAQMR	-0.0450741	-0.156917	-0.0802862	-0.0596002	-0.0699432	SAOUHSC_01605	6-phosphogluconate dehydrogenase, decarboxylating	yes	phosphogluconate dehydrogenase (decarboxylating) activity [GO:0004616]	Enzyme
Q2FY64	Q2FY64_C544	QLRPYEAUVIELN	-1.45415	0.195977	-0.00689812	-0.514717	-0.260808	SAOUHSC_01601	Alpha-amylase	no	alpha-amylase activity [GO:0004556]; alpha-amylase activity (releasing maltohexaose) [GO:0103025]; cation binding [GO:0043169]	Enzyme
Q2FY65	Q2FY65_C230	FLPGKHUAK	-0.253567	0.030548	0.145221	0.132379	0.0814637	SAOUHSC_01600	Uncharacterized protein	no	DNA binding transcription factor activity [GO:0003700]; sequence-specific DNA binding [GO:0043565]	Gene expression and Nucleic acid binding
Q2FY66	Q2FY66_C10	HIPULITIFGATGDLSHR	-0.2179	-0.046421	0.120882	-0.0661107	-0.0562658	zwf	Glucose-6-phosphate 1-dehydrogenase	yes	glucose-6-phosphate dehydrogenase activity [GO:0004345]; NADP binding [GO:0050661]	Enzyme
Q2FY66	Q2FY66_C430	MNTVDAYENLLFDULK	-0.114288	0.0446795	-0.206397	0.001004	-0.0566421	zwf	Glucose-6-phosphate 1-dehydrogenase	yes	glucose-6-phosphate dehydrogenase activity [GO:0004345]; NADP binding [GO:0050661]	Enzyme
Q2FY67	Q2FY67_C215	QGPVVAIFGDTKPUSNER	0.234747	0.271426	-0.210079	-0.0139605	0.110393	rnz	Ribonuclease Z	yes	3'-tRNA processing endoribonuclease activity [GO:0042781]; metal ion binding [GO:0046872]	Gene expression and Nucleic acid binding								Metall binding	Functional site
Q2FY68	Q2FY68_C100	QQLEUQNPVAR	-0.411925	-0.154072	-0.265397	-0.0829273	-0.209735	proC	Pyrroline-5-carboxylate reductase	no	pyrroline-5-carboxylate reductase activity [GO:0004735]	Enzyme
Q2FY68	Q2FY68_C244	GGTTQAGLDTLSQYDLVSIFEDULNAAVDR	-0.252638	-0.09131	-0.243848	-0.0767367	-0.167579	proC	Pyrroline-5-carboxylate reductase	no	pyrroline-5-carboxylate reductase activity [GO:0004735]	Enzyme
Q2FY68	Q2FY68_C81	DNUFISIMAGIPIDYIK	-0.178765	0.0179179	0.0659858	0.038998	0.0284579	proC	Pyrroline-5-carboxylate reductase	no	pyrroline-5-carboxylate reductase activity [GO:0004735]	Enzyme
Q2FY70	Q2FY70_C3	MNUQSESVVR						SAOUHSC_01595	Uncharacterized protein	no	0	not assigned
Q2FY71	Q2FY71_C19	SGISLSELGLGUMSLGTDLK	0.245548	0.272729	0.288536	0.362179	0.280632	SAOUHSC_01594	Uncharacterized protein	no	0	not assigned
Q2FY71	Q2FY71_C35	AEQIIDUAVENGITYFDTADMYDK	-0.32191	0.128821	-0.15101	0.0698396	-0.040585	SAOUHSC_01594	Uncharacterized protein	no	0	not assigned
Q2FY72	Q2FY72_C48	ELVYHNGAVAVUAVTPK	-0.0403189	0.477159	0.0692897	-0.22095	0.0144854	SAOUHSC_01593	NUDIX domain protein	no	hydrolase activity [GO:0016787]	not assigned
Q2FY73	Q2FY73_C100	HFHHHLVUMECGR						SAOUHSC_01592	Transcriptional regulator, Fur, putative	yes	DNA binding transcription factor activity [GO:0003700]; sequence-specific DNA binding [GO:0043565]	Gene expression and Nucleic acid binding
Q2FY73	Q2FY73_C103	HFHHHLVCMEUGR	0.233643	0.184725	-0.0438244		0.184725	SAOUHSC_01592	Transcriptional regulator, Fur, putative	yes	DNA binding transcription factor activity [GO:0003700]; sequence-specific DNA binding [GO:0043565]	Gene expression and Nucleic acid binding
Q2FY73	Q2FY73_C140	LTFHGVUETCQAK	-0.0792341	0.200128	0.187882	-0.146481	0.0543241	SAOUHSC_01592	Transcriptional regulator, Fur, putative	yes	DNA binding transcription factor activity [GO:0003700]; sequence-specific DNA binding [GO:0043565]	Gene expression and Nucleic acid binding
Q2FY73	Q2FY73_C143	LTFHGVCETUQAK	-0.274494	-0.0205307	-0.190256		-0.190256	SAOUHSC_01592	Transcriptional regulator, Fur, putative	yes	DNA binding transcription factor activity [GO:0003700]; sequence-specific DNA binding [GO:0043565]	Gene expression and Nucleic acid binding
Q2FY75	Q2FY75_C21	QHYFLUHDILEDAWK						SAOUHSC_01590	Uncharacterized protein	no	0	not assigned
Q2FY81	Q2FY81_C83	DDGVEVYVHUEDHGIVFNASLPLYK	-0.14116	-0.0787465	0.0518593	0.0268709	-0.0259378	SAOUHSC_01584	Uncharacterized protein	no	0	not assigned
Q2FY84	Q2FY84_C115	FMNLDUISLLDKR	0.296076	0.555054	0.687118	0.832363	0.621086	SAOUHSC_01580	Phi PVL ORF 30-like protein	no	0	not assigned	membrane/cell wall
Q2FY88	Q2FY88_C137	LENLUSLYDIDKEK	0.893183	0.686163	0.350314	0.257964	0.518238	SAOUHSC_01576	Exonuclease family	no	3'-5' exonuclease activity [GO:0008408]; nucleic acid binding [GO:0003676]	Gene expression and Nucleic acid binding
Q2FY89	Q2FY89_C128	TPVNVNGUVSAGVGER						SAOUHSC_01575	Helix-turn-helix domain protein	no	sequence-specific DNA binding [GO:0043565]	Gene expression and Nucleic acid binding
Q2FYE0	Q2FYE0_C130	TFKNENYKEEULR	-0.111555	-0.00277264	0.165301	0.281312	0.0812642	SAOUHSC_01514	Hypothetical phage protein	no	0	not assigned	membrane/cell wall
Q2FYF0	Q2FYF0_C84	VTUIHSGMDEIEK	-0.322488	-0.363259	-0.0602168	0.253626	-0.191352	SAOUHSC_01502	ATP-dependent DNA helicase RecQ, putative	no	ATP binding [GO:0005524]; ATP-dependent 3'-5' DNA helicase activity [GO:0043140]; DNA binding [GO:0003677]; four-way junction helicase activity [GO:0009378]	Gene expression and Nucleic acid binding
Q2FYF3	Q2FYF3_C118	FTITTTKDVYEUR	-0.149457	0.30229	0.263996	-0.19441	0.0572697	SAOUHSC_01499	Uncharacterized protein	no	oxidoreductase activity [GO:0016491]	Enzyme
Q2FYF3	Q2FYF3_C14	VESIIIGGGPUGLSAAIEQK	0.182047	0.38583	0.476881	0.339023	0.362427	SAOUHSC_01499	Uncharacterized protein	no	oxidoreductase activity [GO:0016491]	Enzyme
Q2FYF5	Q2FYF5_C38	GQUVILDNEDVTDFLR	-0.145056	-0.213381	-0.143663	0.093032	-0.14436	SAOUHSC_01496	Cytidylate kinase	yes	ATP binding [GO:0005524]; cytidylate kinase activity [GO:0004127]; pantoate-beta-alanine ligase activity [GO:0004592]	Enzyme
Q2FYG1	Q2FYG1_C250	LGADPMTFLGLGGIGDLIVTUTSTHSR	-0.127069	-0.19413	-0.0493674	0.0462815	-0.0882181	gpsA	Glycerol-3-phosphate dehydrogenase [NAD(P)+]	no	glycerol-3-phosphate dehydrogenase [NAD(P)+] activity [GO:0047952]; glycerol-3-phosphate dehydrogenase [NAD+] activity [GO:0004367]; glycerol-3-phosphate dehydrogenase [NADP+] activity [GO:0036439]; NAD binding [GO:0051287]	Enzyme
Q2FYG1	Q2FYG1_C43	NQDAVDELNTUHTNKK	-0.0360525	0.0794293	0.207143	-0.00643432	0.0364975	gpsA	Glycerol-3-phosphate dehydrogenase [NAD(P)+]	no	glycerol-3-phosphate dehydrogenase [NAD(P)+] activity [GO:0047952]; glycerol-3-phosphate dehydrogenase [NAD+] activity [GO:0004367]; glycerol-3-phosphate dehydrogenase [NADP+] activity [GO:0036439]; NAD binding [GO:0051287]	Enzyme
Q2FYG4	Q2FYG4_C48	VAULTIDTSMR	-0.270295	-0.0852824	-0.215848	-0.0192435	-0.150565	SAOUHSC_01488	Uncharacterized protein	no	0	not assigned
Q2FYG5	Q2FYG5_C110	VLKPGGMVVULETSQPTLPVFK	-0.237354	0.0291348	-0.0301477	-0.154056	-0.0921021	SAOUHSC_01487	Menaquinone biosynthesis methyltransferase, putative	no	methyltransferase activity [GO:0008168]	not assigned
Q2FYG5	Q2FYG5_C16	ALDVUCGTGDWTIALSK	-0.0223611	0.0326651	0.255078	0.156397	0.0945309	SAOUHSC_01487	Menaquinone biosynthesis methyltransferase, putative	no	methyltransferase activity [GO:0008168]	not assigned
Q2FYG5	Q2FYG5_C17	ALDVCUGTGDWTIALSK						SAOUHSC_01487	Menaquinone biosynthesis methyltransferase, putative	no	methyltransferase activity [GO:0008168]	not assigned
Q2FYG6	Q2FYG6_C136	VHQLISESIVDVUR	0.199751	-0.0100182	-0.257356	0.231187	0.0948664	SAOUHSC_01486	Heptaprenyl diphosphate syntase component II, putative	no	heptaprenyl diphosphate synthase activity [GO:0036422]	Enzyme
Q2FYG6	Q2FYG6_C262	KEFEEUIQIIR	-0.308143	-0.288279	-0.207316	-0.002858	-0.247798	SAOUHSC_01486	Heptaprenyl diphosphate syntase component II, putative	no	heptaprenyl diphosphate synthase activity [GO:0036422]	Enzyme
Q2FYG9	Q2FYG9_C148	VAVGALUK	-0.33743	-0.168317	-0.354833	-0.225919	-0.281675	aroC	Chorismate synthase	no	chorismate synthase activity [GO:0004107]; FMN binding [GO:0010181]	Enzyme
Q2FYG9	Q2FYG9_C341	SDSUAVPAASIVCEHVVAFEIAK	0.193583	0.167229	0.320773	0.0193461	0.180406	aroC	Chorismate synthase	no	chorismate synthase activity [GO:0004107]; FMN binding [GO:0010181]	Enzyme				Binding site					Functional site
Q2FYG9	Q2FYG9_C350	SDSCAVPAASIVUEHVVAFEIAK	-0.0813237	-0.0389398	0.210139	0.0472592	0.0041597	aroC	Chorismate synthase	no	chorismate synthase activity [GO:0004107]; FMN binding [GO:0010181]	Enzyme
Q2FYH2	Q2FYH2_C129	MADUSLQSGNYSDAIR	-0.235688	-0.203685	-0.0579622	-0.0284105	-0.130823	SAOUHSC_01480	Uncharacterized protein	no	0	not assigned
Q2FYH2	Q2FYH2_C229	ELMYTTGULEIEHGDANEGVLLLK	-0.366522	-0.158462	-0.117412		-0.158462	SAOUHSC_01480	Uncharacterized protein	no	0	not assigned
Q2FYH5	Q2FYH5_C106	AFKDUNIQYRPK	-0.401025	0.0183493	-0.12688	0.17645	-0.0542652	dinG	Probable ATP-dependent helicase DinG homolog	no	3'-5' exonuclease activity [GO:0008408]; ATP binding [GO:0005524]; ATP-dependent helicase activity [GO:0008026]; DNA binding [GO:0003677]; DNA-directed DNA polymerase activity [GO:0003887]	Gene expression and Nucleic acid binding
Q2FYH6	Q2FYH6_C253	SVLENUK	-0.329419	-0.0160961	0.0184846	-0.0493788	-0.0327374	asnS	Asparagine--tRNA ligase	no	asparagine-tRNA ligase activity [GO:0004816]; ATP binding [GO:0005524]; nucleic acid binding [GO:0003676]	Gene expression and Nucleic acid binding
Q2FYH6	Q2FYH6_C342	IKPFYMQPNPENEETVLUADLIAPEGYGEIIGGSER	-0.129608	0.0706641	0.0918014	0.159242	0.0812327	asnS	Asparagine--tRNA ligase	no	asparagine-tRNA ligase activity [GO:0004816]; ATP binding [GO:0005524]; nucleic acid binding [GO:0003676]	Gene expression and Nucleic acid binding
Q2FYH6	Q2FYH6_C396	YGSVPHUGFGLGLER	0.018907	-0.00647099	0.285119	0.0790015	0.0489542	asnS	Asparagine--tRNA ligase	no	asparagine-tRNA ligase activity [GO:0004816]; ATP binding [GO:0005524]; nucleic acid binding [GO:0003676]	Gene expression and Nucleic acid binding
Q2FYH8	Q2FYH8_C166	LUSVIPR	0.0640551	0.131985	-0.805409	-0.700333	-0.318139	nth	Endonuclease III	no	4 iron, 4 sulfur cluster binding [GO:0051539]; class I DNA-(apurinic or apyrimidinic site) endonuclease activity [GO:0140078]; DNA binding [GO:0003677]; DNA N-glycosylase activity [GO:0019104]; endonuclease activity [GO:0004519]; metal ion binding [GO:0046872]	Gene expression and Nucleic acid binding
Q2FYH8	Q2FYH8_C199	CDIUPLLEDCR	-0.100268	-0.0442557	0.42825		-0.0442557	nth	Endonuclease III	no	4 iron, 4 sulfur cluster binding [GO:0051539]; class I DNA-(apurinic or apyrimidinic site) endonuclease activity [GO:0140078]; DNA binding [GO:0003677]; DNA N-glycosylase activity [GO:0019104]; endonuclease activity [GO:0004519]; metal ion binding [GO:0046872]	Gene expression and Nucleic acid binding								Metall binding	Functional site
Q2FYI3	Q2FYI3_C81	KFELLIANIEQLSVEUHFK	0.0673535	0.156292	0.134313	0.47676	0.145302	SAOUHSC_01464	Uncharacterized protein	no	0	not assigned
Q2FYI6	Q2FYI6_C107	STLHSVPDUQAITK	-0.165366	-0.0822734	-0.0759244	0.0165224	-0.0790989	SAOUHSC_01460	Uncharacterized protein	no	RNA binding [GO:0003723]; rRNA (guanine-N2-)-methyltransferase activity [GO:0008990]; rRNA (guanine-N7-)-methyltransferase activity [GO:0070043]	Gene expression and Nucleic acid binding
Q2FYI6	Q2FYI6_C364	LFNGYIEUTYYQYWGK	-0.0415508	-0.301124	-0.22016		-0.22016	SAOUHSC_01460	Uncharacterized protein	no	RNA binding [GO:0003723]; rRNA (guanine-N2-)-methyltransferase activity [GO:0008990]; rRNA (guanine-N7-)-methyltransferase activity [GO:0070043]	Gene expression and Nucleic acid binding
Q2FYI6	Q2FYI6_C8	FQLLAVUPMGLEAVVAR	0.0672929	0.0452186	-0.138179	0.195203	0.0562557	SAOUHSC_01460	Uncharacterized protein	no	RNA binding [GO:0003723]; rRNA (guanine-N2-)-methyltransferase activity [GO:0008990]; rRNA (guanine-N7-)-methyltransferase activity [GO:0070043]	Gene expression and Nucleic acid binding
Q2FYJ0	Q2FYJ0_C1074	DIHESIUQSTLGLLQPQMGLLR	-0.404515	-0.197832	-0.215262	-0.430567	-0.309888	SAOUHSC_01455	Uncharacterized protein	no	0	not assigned
Q2FYJ0	Q2FYJ0_C43	VYLQQYTUSFVGHFSAGK	-0.143512	-0.17316	-0.187299	-0.0655286	-0.158336	SAOUHSC_01455	Uncharacterized protein	no	0	not assigned
Q2FYJ2	Q2FYJ2_C18	VAUTPENVR	-0.490996	-0.434204	-0.477847	-0.15552	-0.456025	ald1	Alanine dehydrogenase 1	no	alanine dehydrogenase activity [GO:0000286]	Enzyme
Q2FYJ2	Q2FYJ2_C326	TSTMALAQGNIDYILEIUDK	-0.114254	-0.308448	-0.428313		-0.308448	ald1	Alanine dehydrogenase 1	no	alanine dehydrogenase activity [GO:0000286]	Enzyme
Q2FYJ3	Q2FYJ3_C244	VDSTIADGUDVK	-0.346476	-0.0577599	-0.0951871	-0.030404	-0.0764735	tdcB	L-threonine dehydratase catabolic TdcB	no	L-threonine ammonia-lyase activity [GO:0004794]; nucleotide binding [GO:0000166]; pyridoxal phosphate binding [GO:0030170]	Enzyme
Q2FYK4	Q2FYK4_C144	DAFDENUK	-0.328082	-0.29379	-0.0623456	-0.130097	-0.211944	SAOUHSC_01436	UPF0403 protein SAOUHSC_01436	no	0	not assigned
Q2FYK5	Q2FYK5_C13	MLNSFDAAYHSLUEEVLEIGNTR	-0.155068	-0.226915	-0.0218483	-0.0604424	-0.107755	thyA	Thymidylate synthase	yes	thymidylate synthase activity [GO:0004799]	Enzyme
Q2FYK5	Q2FYK5_C201	HIVSAWNPTEIDTMALPPUHTMFQFYVQDGK	0.205142	0.000144262			0.102643	thyA	Thymidylate synthase	yes	thymidylate synthase activity [GO:0004799]	Enzyme			Active site						Functional site
Q2FYK5	Q2FYK5_C216	LSUQLYQR	-0.239651	-0.065325	0.0103502	0.0280033	-0.0274874	thyA	Thymidylate synthase	yes	thymidylate synthase activity [GO:0004799]	Enzyme						Nucleotide binding			Functional site
Q2FYK5	Q2FYK5_C247	EUGLEVGEFVHTFGDAHIYSNHIDAIQTQLAR	-0.0522067	0.293017	0.101381		0.101381	thyA	Thymidylate synthase	yes	thymidylate synthase activity [GO:0004799]	Enzyme
Q2FYM1	Q2FYM1_C744	FLQLAAENNUTVVNLSSSSNYFHLLR	-0.22233	-0.169517	-0.166519	-0.164723	-0.168018	odhA	2-oxoglutarate dehydrogenase E1 component	no	oxoglutarate dehydrogenase (succinyl-transferring) activity [GO:0004591]; thiamine pyrophosphate binding [GO:0030976]	Enzyme
Q2FYM2	Q2FYM2_C303	DUDKKNFAEIEAEIANLAVK	-0.189537	-0.0136078	-0.204243	-0.0664163	-0.127977	odhB	Dihydrolipoyllysine-residue succinyltransferase component of 2-oxoglutarate dehydrogenase complex	no	dihydrolipoyllysine-residue succinyltransferase activity [GO:0004149]	Enzyme
Q2FYN4	Q2FYN4_C199	GVHUHIGSQIEGTEAFIETAK	-0.0453772	0.058814	0.125772	0.060909	0.0598615	lysA	Diaminopimelate decarboxylase	no	diaminopimelate decarboxylase activity [GO:0008836]; pyridoxal phosphate binding [GO:0030170]	Enzyme
Q2FYN4	Q2FYN4_C349	LUESGDIIIK	-0.166248	-0.14342	0.219215	-0.0177727	-0.0805966	lysA	Diaminopimelate decarboxylase	no	diaminopimelate decarboxylase activity [GO:0008836]; pyridoxal phosphate binding [GO:0030170]	Enzyme				Binding site					Functional site
Q2FYN4	Q2FYN4_C66	AFTUIQMVK	-0.198891	-0.0935557	0.0842004	-0.0976254	-0.0955906	lysA	Diaminopimelate decarboxylase	no	diaminopimelate decarboxylase activity [GO:0008836]; pyridoxal phosphate binding [GO:0030170]	Enzyme
Q2FYN6	Q2FYN6_C281	LLFNVDUEVK	-0.762143	-0.308698	-0.396384	-0.632025	-0.514205	SAOUHSC_01399	Uncharacterized hydrolase SAOUHSC_01399	no	hydrolase activity [GO:0016787]	not assigned
Q2FYP0	Q2FYP0_C126	GIIANPNUSTIQSVVPLK	0.30381	0.511367	0.59321	0.716069	0.552289	asd	Aspartate-semialdehyde dehydrogenase	no	aspartate-semialdehyde dehydrogenase activity [GO:0004073]; NAD binding [GO:0051287]; NADP binding [GO:0050661]; protein dimerization activity [GO:0046983]	Enzyme			Active site						Functional site
Q2FYP0	Q2FYP0_C224	VTATUAR	-0.0809269	-0.0396069	0.251083	0.135141	0.047767	asd	Aspartate-semialdehyde dehydrogenase	no	aspartate-semialdehyde dehydrogenase activity [GO:0004073]; NAD binding [GO:0051287]; NADP binding [GO:0050661]; protein dimerization activity [GO:0046983]	Enzyme				Binding site					Functional site
Q2FYP0	Q2FYP0_C302	DDSLENTFHVWUTSDNLLK	-0.492018	0.31904			-0.0864889	asd	Aspartate-semialdehyde dehydrogenase	no	aspartate-semialdehyde dehydrogenase activity [GO:0004073]; NAD binding [GO:0051287]; NADP binding [GO:0050661]; protein dimerization activity [GO:0046983]	Enzyme				Binding site					Functional site
Q2FYP2	Q2FYP2_C219	HFLNNVUTHIADLDFGK	-0.117693	0.00129784	-0.40213	0.117296	-0.0581978	SAOUHSC_01392	ABC transporter, ATP-binding protein, putative	no	ATPase activity [GO:0016887]; ATP binding [GO:0005524]	not assigned
Q2FYP2	Q2FYP2_C29	FTEGNUYGLIGANGAGK	-0.626892	-0.203735		-0.371385	-0.371385	SAOUHSC_01392	ABC transporter, ATP-binding protein, putative	no	ATPase activity [GO:0016887]; ATP binding [GO:0005524]	not assigned						Nucleotide binding			Functional site
Q2FYQ2	Q2FYQ2_C361	DTGAFUASPYFTHSYVFISWTGK	-0.357028	-0.240588	-0.214508		-0.240588	SAOUHSC_01383	Uncharacterized protein	no	metal ion binding [GO:0046872]; metalloendopeptidase activity [GO:0004222]	Enzyme
Q2FYQ9	Q2FYQ9_C23	GFNYYQSEUVINLK		-0.180299	0.00345832	-0.262209	-0.180299	SAOUHSC_01376	Uncharacterized protein	no	zinc ion binding [GO:0008270]	not assigned
Q2FYQ9	Q2FYQ9_C61	SIUNCPHADGR	-0.219012	-0.0037125	0.267575	0.185793	0.0910405	SAOUHSC_01376	Uncharacterized protein	no	zinc ion binding [GO:0008270]	not assigned
Q2FYQ9	Q2FYQ9_C63	SICNUPHADGR	-0.160527	0.0464212	0.306858	0.319502	0.17664	SAOUHSC_01376	Uncharacterized protein	no	zinc ion binding [GO:0008270]	not assigned
Q2FYR0	Q2FYR0_C12	FVFDIDGTLUFDGR	0.319155	0.548239			0.433697	SAOUHSC_01375	Uncharacterized protein	no	hydrolase activity [GO:0016787]	not assigned
Q2FYR0	Q2FYR0_C129	LDPHKLASUIDVANIDTPIK						SAOUHSC_01375	Uncharacterized protein	no	hydrolase activity [GO:0016787]	not assigned
Q2FYR0	Q2FYR0_C248	HINNNAQAIUK						SAOUHSC_01375	Uncharacterized protein	no	hydrolase activity [GO:0016787]	not assigned
Q2FYR1	Q2FYR1_C102	YLQQHQULYVK	-0.150126	-0.0316741	0.114985	0.00207617	-0.014799	femB	Aminoacyltransferase FemB	yes	transferase activity, transferring amino-acyl groups [GO:0016755]	Enzyme
Q2FYR2	Q2FYR2_C56	NNNNEVIAAULLTAVPVMK	-0.520314	0.210638	0.00201836	-0.137299	-0.0676402	femA	Aminoacyltransferase FemA	yes	nucleotide binding [GO:0000166]; transferase activity, transferring amino-acyl groups [GO:0016755]	Enzyme
Q2FYS0	Q2FYS0_C115	TDAGQIYTGTIULHETSVHVYR						SAOUHSC_01365	Uncharacterized protein	no	aminopeptidase activity [GO:0004177]; metal ion binding [GO:0046872]	Enzyme
Q2FYS0	Q2FYS0_C275	SHLVNLUK	-0.0892827	0.605305	-0.733028	-0.0479945	-0.0686386	SAOUHSC_01365	Uncharacterized protein	no	aminopeptidase activity [GO:0004177]; metal ion binding [GO:0046872]	Enzyme
Q2FYS9	Q2FYS9_C314	ATIANMAPEYGATUGFFPVDDESLK	-0.0623844	-0.189911	-0.12356	-0.0733629	-0.0984613	SAOUHSC_01347	Aconitate hydratase	no	4 iron, 4 sulfur cluster binding [GO:0051539]; aconitate hydratase activity [GO:0003994]	Enzyme
Q2FYS9	Q2FYS9_C443	TGDIAIAAITSUTNTSNPYVMLGAGLVAK	0.158596	0.227002	0.342327	0.466027	0.284664	SAOUHSC_01347	Aconitate hydratase	no	4 iron, 4 sulfur cluster binding [GO:0051539]; aconitate hydratase activity [GO:0003994]	Enzyme
Q2FYS9	Q2FYS9_C509	DAGLQPYLDDLGFNLVGYGUTTCIGNSGPLLPEIEK	0.00619029	-0.273378	0.403486	0.400429	0.203309	SAOUHSC_01347	Aconitate hydratase	no	4 iron, 4 sulfur cluster binding [GO:0051539]; aconitate hydratase activity [GO:0003994]	Enzyme
Q2FYT3	Q2FYT3_C349	ILNLDUDKR	-0.281667	-0.141653	-0.0183811	0.0776532	-0.080017	sbcC	Nuclease SbcCD subunit C	no	ATP binding [GO:0005524]; endonuclease activity [GO:0004519]; exonuclease activity [GO:0004527]	Gene expression and Nucleic acid binding
Q2FYT3	Q2FYT3_C808	MNTLIDEYSAVHYQUQNNINK	-0.393823	-0.174475	-0.301888	-0.00284491	-0.238182	sbcC	Nuclease SbcCD subunit C	no	ATP binding [GO:0005524]; endonuclease activity [GO:0004519]; exonuclease activity [GO:0004527]	Gene expression and Nucleic acid binding
Q2FYU4	Q2FYU4_C195	TGFGTGGWQLAALNIUSK	0.0103502	-0.142019	-0.243489	-0.308055	-0.192754	guaC	GMP reductase	no	GMP reductase activity [GO:0003920]	Enzyme
Q2FYU4	Q2FYU4_C24	SEUDTTIQFGPK	-0.28891	0.00317044	0.0923428	-0.0447021	-0.0207658	guaC	GMP reductase	no	GMP reductase activity [GO:0003920]	Enzyme
Q2FYU6	Q2FYU6_C12	VNVTLACTEUGDR	-0.49657	-0.575579	0.115832	-0.217508	-0.357039	rpmG1	50S ribosomal protein L33 1	no	structural constituent of ribosome [GO:0003735]	Modulator/Scaffolding/Adaptor
Q2FYU6	Q2FYU6_C9	VNVTLAUTECGDR	-0.315829	-0.146242	0.310805	0.0848807	-0.0306805	rpmG1	50S ribosomal protein L33 1	no	structural constituent of ribosome [GO:0003735]	Modulator/Scaffolding/Adaptor
Q2FYU7	Q2FYU7_C368	GVGIENIUPFSR	0.738379	0.785843	0.899253	0.862749	0.824296	katA	Catalase	no	catalase activity [GO:0004096]; heme binding [GO:0020037]; metal ion binding [GO:0046872]	Enzyme
Q2FYU7	Q2FYU7_C468	HIRHUYK	-0.21108	-0.208052	0.00659178	0.106853	-0.10073	katA	Catalase	no	catalase activity [GO:0004096]; heme binding [GO:0020037]; metal ion binding [GO:0046872]	Enzyme
Q2FYV1	Q2FYV1_C101	SIGKQDFDEIVDYUR	-0.511382	-0.192047	-0.723247	0.0419187	-0.351715	SAOUHSC_01323	Uncharacterized protein	no	hydrolase activity [GO:0016787]	not assigned
Q2FYV2	Q2FYV2_C285	SLNSQVVSUHSELVDINISGVK	-0.160637	-1.12627			-0.643451	thrB	Homoserine kinase	no	ATP binding [GO:0005524]; homoserine kinase activity [GO:0004413]	Enzyme
Q2FYV3	Q2FYV3_C36	LTLNEGNTPLIHUENMSK	-0.242345	0.0899049	-0.0258525	-0.0314152	-0.0286339	SAOUHSC_01321	Threonine synthase	no	pyridoxal phosphate binding [GO:0030170]; threonine synthase activity [GO:0004795]	Enzyme
Q2FYV3	Q2FYV3_C82	IVIUASTGNTSASAAAYAAR	-0.427442	-0.099796	-0.1162	-0.124769	-0.120485	SAOUHSC_01321	Threonine synthase	no	pyridoxal phosphate binding [GO:0030170]; threonine synthase activity [GO:0004795]	Enzyme				Binding site					Functional site
Q2FYW4	Q2FYW4_C377	SGVDVHLMIPUKPDHPLVYWATFSNASDLLSSGVK	-0.027175	0.374622		0.295488	0.295488	SAOUHSC_01310	Cardiolipin synthase	no	cardiolipin synthase activity [GO:0008808]	Enzyme	membrane/cell wall
Q2FYW6	Q2FYW6_C50	IKDTIDUPNATIR	-0.506066	-0.0369699	-0.109639	-0.0331266	-0.0733044	SAOUHSC_01307	Uncharacterized protein	no	lyase activity [GO:0016829]	not assigned
Q2FYY3	Q2FYY3_C68	TLENKTEU	-0.644623	0.0957219	-0.0846091	-0.202755	-0.143682	SAOUHSC_01290	Uncharacterized protein	no	0	not assigned
Q2FYY6	Q2FYY6_C170	GEPTLELNDDGGYFDLAPTDLGENUR	-0.896662	-0.322402	-0.398821	-0.400916	-0.399869	SAOUHSC_01287	Glutamine synthetase	yes	ATP binding [GO:0005524]; glutamate-ammonia ligase activity [GO:0004356]	Enzyme
Q2FYY6	Q2FYY6_C210	YADAVTAUDNIQTFK	-0.812055	-0.322379	-0.363642	-0.43862	-0.401131	SAOUHSC_01287	Glutamine synthetase	yes	ATP binding [GO:0005524]; glutamate-ammonia ligase activity [GO:0004356]	Enzyme
Q2FYY6	Q2FYY6_C291	GFTAVUNPLVNSYK	-0.823649	-0.398803	-0.405681	-0.484076	-0.444878	SAOUHSC_01287	Glutamine synthetase	yes	ATP binding [GO:0005524]; glutamate-ammonia ligase activity [GO:0004356]	Enzyme
Q2FYY6	Q2FYY6_C309	LVPGYEAPUYIAWSGK	-0.716795	-0.282607	-0.309972	-0.296157	-0.303065	SAOUHSC_01287	Glutamine synthetase	yes	ATP binding [GO:0005524]; glutamate-ammonia ligase activity [GO:0004356]	Enzyme
Q2FYY6	Q2FYY6_C96	LIUDVYK	-0.958755	-0.442989	-0.675363	-0.53021	-0.602786	SAOUHSC_01287	Glutamine synthetase	yes	ATP binding [GO:0005524]; glutamate-ammonia ligase activity [GO:0004356]	Enzyme
Q2FYY9	Q2FYY9_C330	DLUDHASNRPASDLPNVFVSSK	-0.242567	-0.158929	-0.374094	-0.417271	-0.30833	hflX	GTPase HflX	no	GTPase activity [GO:0003924]; GTP binding [GO:0005525]; ribosome binding [GO:0043022]	Modulator/Scaffolding/Adaptor
Q2FYZ0	Q2FYZ0_C36	GDVMLIVNTASEUGFTSQFEGLQSLYEK	0.027869	0.0479874	-0.0194043	0.200145	0.0379282	SAOUHSC_01282	Glutathione peroxidase	no	glutathione peroxidase activity [GO:0004602]	Enzyme			Active site						Functional site
Q2FYZ0	Q2FYZ0_C64	DQGFVILGFPUNQFGGQEPGSGEEAAQNCK	-0.0298845	0.361554	0.309758	0.237197	0.273477	SAOUHSC_01282	Glutathione peroxidase	no	glutathione peroxidase activity [GO:0004602]	Enzyme
Q2FYZ0	Q2FYZ0_C82	DQGFVILGFPCNQFGGQEPGSGEEAAQNUK	0.10165	0.363564	0.502229	0.542803	0.432896	SAOUHSC_01282	Glutathione peroxidase	no	glutathione peroxidase activity [GO:0004602]	Enzyme
Q2FYZ4	Q2FYZ4_C405	DYGLTFSPUNTK	-0.255839	0.366476	-0.13016	-0.252071	-0.191116	glpD	Aerobic glycerol-3-phosphate dehydrogenase	no	sn-glycerol-3-phosphate:ubiquinone-8 oxidoreductase activity [GO:0052591]	Enzyme
Q2FYZ5	Q2FYZ5_C111	QTQSIUSELK	-0.0298057	0.0747794	0.0699771	-0.0016453	0.0341659	glpK	Glycerol kinase	no	ATP binding [GO:0005524]; glycerol kinase activity [GO:0004370]	Enzyme
Q2FYZ5	Q2FYZ5_C254	TIDYHFYGQEVPIAGVAGDQQAALFGQAUFER	-0.0141107	0.141044	0.184716	0.148203	0.144623	glpK	Glycerol kinase	no	ATP binding [GO:0005524]; glycerol kinase activity [GO:0004370]	Enzyme
Q2FYZ5	Q2FYZ5_C384	ATLESLUYQTR	-0.143038	-0.199322	-0.142306	0.0176369	-0.142672	glpK	Glycerol kinase	no	ATP binding [GO:0005524]; glycerol kinase activity [GO:0004370]	Enzyme
Q2FYZ7	Q2FYZ7_C29	MUVLLDMHIGHIK	0.00561557	-0.0431702	0.214995	0.198746	0.102181	SAOUHSC_01274	Glycerol uptake operon antiterminator regulatory protein	no	RNA binding [GO:0003723]	Gene expression and Nucleic acid binding
Q2FYZ7	Q2FYZ7_C53	QNHIEUFIHIDLIK	-0.302084	-0.278811	-0.163543	-0.362566	-0.290447	SAOUHSC_01274	Glycerol uptake operon antiterminator regulatory protein	no	RNA binding [GO:0003723]	Gene expression and Nucleic acid binding
Q2FYZ9	Q2FYZ9_C21	IKSEYQDULLFFR	-0.317445	-0.140412	0.0805212	0.136979	-0.0299454	mutS	DNA mismatch repair protein MutS	no	ATP binding [GO:0005524]; damaged DNA binding [GO:0003684]; DNA-dependent ATPase activity [GO:0008094]; mismatched DNA binding [GO:0030983]	Gene expression and Nucleic acid binding
Q2FYZ9	Q2FYZ9_C541	IISELDULQSFAEIAQK	0.118493	0.124328	0.369383	0.611928	0.246855	mutS	DNA mismatch repair protein MutS	no	ATP binding [GO:0005524]; damaged DNA binding [GO:0003684]; DNA-dependent ATPase activity [GO:0008094]; mismatched DNA binding [GO:0030983]	Gene expression and Nucleic acid binding
Q2FYZ9	Q2FYZ9_C589	VMDYNDYVPNNUR	0.0924781	-0.138902			-0.023212	mutS	DNA mismatch repair protein MutS	no	ATP binding [GO:0005524]; damaged DNA binding [GO:0003684]; DNA-dependent ATPase activity [GO:0008094]; mismatched DNA binding [GO:0030983]	Gene expression and Nucleic acid binding
Q2FYZ9	Q2FYZ9_C630	QVAIISIMAQMGAYVPUK	-0.0697547	0.427177	0.0718999	0.313826	0.192863	mutS	DNA mismatch repair protein MutS	no	ATP binding [GO:0005524]; damaged DNA binding [GO:0003684]; DNA-dependent ATPase activity [GO:0008094]; mismatched DNA binding [GO:0030983]	Gene expression and Nucleic acid binding
Q2FYZ9	Q2FYZ9_C87	VAIUEQMEDPK	-0.152468	0.0382957	0.0988238	0.0886844	0.06349	mutS	DNA mismatch repair protein MutS	no	ATP binding [GO:0005524]; damaged DNA binding [GO:0003684]; DNA-dependent ATPase activity [GO:0008094]; mismatched DNA binding [GO:0030983]	Gene expression and Nucleic acid binding
Q2FZ02	Q2FZ02_C145	ERPDILIGVUGCMSQEESVVNK	0.228111	0.79693			0.51252	miaB	tRNA-2-methylthio-N(6)-dimethylallyladenosine synthase	no	4 iron, 4 sulfur cluster binding [GO:0051539]; metal ion binding [GO:0046872]; transferase activity [GO:0016740]	not assigned								Metall binding	Functional site
Q2FZ02	Q2FZ02_C147	ERPDILIGVCGUMSQEESVVNK	0.326882		1.01214	0.445515	0.445515	miaB	tRNA-2-methylthio-N(6)-dimethylallyladenosine synthase	no	4 iron, 4 sulfur cluster binding [GO:0051539]; metal ion binding [GO:0046872]; transferase activity [GO:0016740]	not assigned								Metall binding	Functional site
Q2FZ02	Q2FZ02_C230	FCTYUIVPFTR						miaB	tRNA-2-methylthio-N(6)-dimethylallyladenosine synthase	no	4 iron, 4 sulfur cluster binding [GO:0051539]; metal ion binding [GO:0046872]; transferase activity [GO:0016740]	not assigned								Metall binding	Functional site
Q2FZ02	Q2FZ02_C453	YEGQTVTVLUEGSSK	-0.0259847	0.153416	0.55218	0.385155	0.269286	miaB	tRNA-2-methylthio-N(6)-dimethylallyladenosine synthase	no	4 iron, 4 sulfur cluster binding [GO:0051539]; metal ion binding [GO:0046872]; transferase activity [GO:0016740]	not assigned
Q2FZ03	Q2FZ03_C54	VGPLETTVQGNMNEULILIQSLNER	-0.3687	-0.0358454	-0.181886	-0.0547968	-0.118341	SAOUHSC_01268	Uncharacterized protein	no	0	not assigned
Q2FZ03	Q2FZ03_C70	MVELEUPSIISQVK	-0.155405	-0.08982	-0.00298947	0.136323	-0.0464047	SAOUHSC_01268	Uncharacterized protein	no	0	not assigned
Q2FZ04	Q2FZ04_C199	LIEDAINHDGFSFVNVFSPUVTYNK	0.385928	0.354001		0.458592	0.385928	SAOUHSC_01267	Uncharacterized protein	no	catalytic activity [GO:0003824]; thiamine pyrophosphate binding [GO:0030976]	Enzyme
Q2FZ04	Q2FZ04_C50	AAANIGLEPEEVAIITGIGUSGR	0.0913952	0.0287106	0.173639	0.38405	0.132517	SAOUHSC_01267	Uncharacterized protein	no	catalytic activity [GO:0003824]; thiamine pyrophosphate binding [GO:0030976]	Enzyme
Q2FZ05	Q2FZ05_C106	AKPVKPEGUHAQLIELPFTATAK	-0.204682	0.0221902	-0.128629	-0.106529	-0.117579	SAOUHSC_01266	Uncharacterized protein	no	oxidoreductase activity [GO:0016491]; oxidoreductase activity, acting on the aldehyde or oxo group of donors [GO:0016903]	Enzyme
Q2FZ07	Q2FZ07_C53	YSTIATNUYDTAEVIK						SAOUHSC_01264	Uncharacterized protein	no	0	not assigned
Q2FZ13	Q2FZ13_C151	TESIVAGSVUAHK	-0.0877944	-0.022679	0.206893	0.145221	0.061271	SAOUHSC_01258	Uncharacterized protein	no	0	not assigned
Q2FZ13	Q2FZ13_C226	VVEHPDLFVETSTUTMEDFDYIIELR	-0.0373992	0.167229	0.436588	0.869477	0.301909	SAOUHSC_01258	Uncharacterized protein	no	0	not assigned
Q2FZ14	Q2FZ14_C210	LVLPSEVAHTUAYLYHPNAR	-0.0188488	-0.133622	0.179256	0.361319	0.0802037	SAOUHSC_01257	Uncharacterized protein	no	0	not assigned
Q2FZ17	Q2FZ17_C152	ELTUTEYQMSNGSILSAIK	0.0184587	0.307059			0.162759	SAOUHSC_01254	Uncharacterized protein	no	DNA binding [GO:0003677]; DNA binding transcription factor activity [GO:0003700]	Gene expression and Nucleic acid binding
Q2FZ17	Q2FZ17_C175	EQSNHNIUYADTEIEAVNYEPR	0.0597706	0.153287			0.106529	SAOUHSC_01254	Uncharacterized protein	no	DNA binding [GO:0003677]; DNA binding transcription factor activity [GO:0003700]	Gene expression and Nucleic acid binding
Q2FZ18	Q2FZ18_C438	SVUINGIITSILLNAKPHEVK	0.376624	0.334111	0.106616	0.667483	0.355367	SAOUHSC_01253	Uncharacterized protein	no	ATP binding [GO:0005524]; DNA binding [GO:0003677]	Gene expression and Nucleic acid binding	membrane/cell wall					Nucleotide binding			Functional site
Q2FZ19	Q2FZ19_C153	NVNISFFNTTHSIPDSLGVUIHTSYGAIVYTGEFK	0.119555	0.398131			0.258843	rnj2	Ribonuclease J 2	yes	5'-3' exoribonuclease activity [GO:0004534]; endoribonuclease activity [GO:0004521]; RNA binding [GO:0003723]; zinc ion binding [GO:0008270]	Gene expression and Nucleic acid binding
Q2FZ19	Q2FZ19_C233	LIVSUYASNFIR	-0.160061	0.187736	-0.0148385	-0.0424446	-0.0286416	rnj2	Ribonuclease J 2	yes	5'-3' exoribonuclease activity [GO:0004534]; endoribonuclease activity [GO:0004521]; RNA binding [GO:0003723]; zinc ion binding [GO:0008270]	Gene expression and Nucleic acid binding
Q2FZ19	Q2FZ19_C372	IHASSHGUMEELK	-0.149738	-0.138387	-0.090424	0.0131973	-0.114406	rnj2	Ribonuclease J 2	yes	5'-3' exoribonuclease activity [GO:0004534]; endoribonuclease activity [GO:0004521]; RNA binding [GO:0003723]; zinc ion binding [GO:0008270]	Gene expression and Nucleic acid binding
Q2FZ20	Q2FZ20_C448	IVSEVLESNGSSSQASIUGSTLALMDAGVPIK	-0.629055	0.126709	-0.0221706	-0.0499049	-0.0360377	pnp	Polyribonucleotide nucleotidyltransferase	no	metal ion binding [GO:0046872]; polyribonucleotide nucleotidyltransferase activity [GO:0004654]; RNA binding [GO:0003723]	Gene expression and Nucleic acid binding
Q2FZ22	Q2FZ22_C47	MDUEIAVIVGGGNIWR	-0.20191	-0.0558773	0.124328	0.0197731	-0.0180521	pyrH	Uridylate kinase	yes	ATP binding [GO:0005524]; UMP kinase activity [GO:0033862]	Enzyme
Q2FZ23	Q2FZ23_C23	TGAGMMDUK	-0.304563	-0.126805	-0.212037	-0.130117	-0.171077	tsf	Elongation factor Ts	yes	translation elongation factor activity [GO:0003746]	Gene expression and Nucleic acid binding
Q2FZ23	Q2FZ23_C240	YLQEIUAVDQDFVK	-0.307514	-0.253726	-0.193515	-0.0950594	-0.22362	tsf	Elongation factor Ts	yes	translation elongation factor activity [GO:0003746]	Gene expression and Nucleic acid binding
Q2FZ25	Q2FZ25_C191	KLNIPIVGIVDTNUDPDEIDYVIPANDDAIR	-0.247748	-0.0388953	-0.126738	-0.0079132	-0.0828167	rpsB	30S ribosomal protein S2	yes	structural constituent of ribosome [GO:0003735]	Modulator/Scaffolding/Adaptor
Q2FZ29	Q2FZ29_C169	VAADIUVFTNDNIVVETL	-0.284651	-0.251728	-0.245044	-0.0187026	-0.248386	hslV	ATP-dependent protease subunit HslV	no	metal ion binding [GO:0046872]; threonine-type endopeptidase activity [GO:0004298]	Enzyme								Metall binding	Functional site
Q2FZ30	Q2FZ30_C199	QSIENYLEHFKPIQSUNHDFLIVNMK		0.244765	0.31545		0.280108	xerC	Tyrosine recombinase XerC	no	DNA binding [GO:0003677]	Gene expression and Nucleic acid binding
Q2FZ31	Q2FZ31_C191	SRYDKGEAAYLNUPMTEDEFNR	0.21176		0.474566	0.24062	0.24062	trmFO	Methylenetetrahydrofolate--tRNA-(uracil-5-)-methyltransferase TrmFO	no	flavin adenine dinucleotide binding [GO:0050660]; methylenetetrahydrofolate-tRNA-(uracil-5-)-methyltransferase (FADH2-oxidizing) activity [GO:0047151]	Gene expression and Nucleic acid binding
Q2FZ31	Q2FZ31_C225	YFEGUMPFEVMAER	0.00126164	0.162164	0.253925	0.236917	0.199541	trmFO	Methylenetetrahydrofolate--tRNA-(uracil-5-)-methyltransferase TrmFO	no	flavin adenine dinucleotide binding [GO:0050660]; methylenetetrahydrofolate-tRNA-(uracil-5-)-methyltransferase (FADH2-oxidizing) activity [GO:0047151]	Gene expression and Nucleic acid binding
Q2FZ31	Q2FZ31_C52	FAELVUSNSLR	0.0858249	0.255804	0.552377	0.485427	0.370616	trmFO	Methylenetetrahydrofolate--tRNA-(uracil-5-)-methyltransferase TrmFO	no	flavin adenine dinucleotide binding [GO:0050660]; methylenetetrahydrofolate-tRNA-(uracil-5-)-methyltransferase (FADH2-oxidizing) activity [GO:0047151]	Gene expression and Nucleic acid binding
Q2FZ36	Q2FZ36_C124	LVGPNUPGVITADECK	-0.017575	-0.0960233	0.209806	0.0245994	0.00351218	sucD	Succinate--CoA ligase [ADP-forming] subunit alpha	no	cofactor binding [GO:0048037]; nucleotide binding [GO:0000166]; succinate-CoA ligase (ADP-forming) activity [GO:0004775]	Enzyme
Q2FZ36	Q2FZ36_C133	LVGPNCPGVITADEUK	-0.157573	-0.0378138	0.515281	-0.0393644	-0.0385891	sucD	Succinate--CoA ligase [ADP-forming] subunit alpha	no	cofactor binding [GO:0048037]; nucleotide binding [GO:0000166]; succinate-CoA ligase (ADP-forming) activity [GO:0004775]	Enzyme
Q2FZ36	Q2FZ36_C269	TLNSUGVK	-0.287968	-0.178959	-0.0389549	-0.0786066	-0.128783	sucD	Succinate--CoA ligase [ADP-forming] subunit alpha	no	cofactor binding [GO:0048037]; nucleotide binding [GO:0000166]; succinate-CoA ligase (ADP-forming) activity [GO:0004775]	Enzyme
Q2FZ37	Q2FZ37_C102	LYIEEGUAIQK	-0.241346	-0.158156	-0.102371	-0.0381091	-0.130264	sucC	Succinate--CoA ligase [ADP-forming] subunit beta	yes	ATP binding [GO:0005524]; metal ion binding [GO:0046872]; succinate-CoA ligase (ADP-forming) activity [GO:0004775]	Enzyme				Binding site					Functional site
Q2FZ37	Q2FZ37_C193	DUSIVEINPLVTTADGDVLALDAK	-0.173431	-0.246438	-0.153318	0.0207946	-0.163374	sucC	Succinate--CoA ligase [ADP-forming] subunit beta	yes	ATP binding [GO:0005524]; metal ion binding [GO:0046872]; succinate-CoA ligase (ADP-forming) activity [GO:0004775]	Enzyme
Q2FZ38	Q2FZ38_C26	EVTQLINAVNTIEELENHEUFLDER	-0.343074	0.00633393	0.0762854	0.361432	0.0413097	rnhB	Ribonuclease HII	no	metal ion binding [GO:0046872]; RNA binding [GO:0003723]; RNA-DNA hybrid ribonuclease activity [GO:0004523]	Gene expression and Nucleic acid binding
Q2FZ39	Q2FZ39_C277	IGNYUFDIFK		-0.146595	-0.267132	0.0749164	-0.146595	SAOUHSC_01214	Ribosome biogenesis GTPase A	yes	GTPase activity [GO:0003924]; GTP binding [GO:0005525]	not assigned
Q2FZ43	Q2FZ43_C110	ADHIVFIUGHYEGYDER	-0.356883	-0.0333776	0.0381552	0.157691	0.00238881	trmD	tRNA (guanine-N(1)-)-methyltransferase	yes	2-C-methyl-D-erythritol 4-phosphate cytidylyltransferase activity [GO:0050518]; tRNA (guanine(37)-N(1))-methyltransferase activity [GO:0052906]; tRNA (guanine-N1-)-methyltransferase activity [GO:0009019]	Gene expression and Nucleic acid binding				Binding site					Functional site
Q2FZ43	Q2FZ43_C86	VILMUPQGEPFSHQK	-0.0897586	0.0945063	0.214125	0.0367495	0.0656279	trmD	tRNA (guanine-N(1)-)-methyltransferase	yes	2-C-methyl-D-erythritol 4-phosphate cytidylyltransferase activity [GO:0050518]; tRNA (guanine(37)-N(1))-methyltransferase activity [GO:0052906]; tRNA (guanine-N1-)-methyltransferase activity [GO:0009019]	Gene expression and Nucleic acid binding
Q2FZ48	Q2FZ48_C274	GVDILIUDTAGR	-0.328282	-0.096141	-0.193312	-0.0500016	-0.144727	ftsY	Signal recognition particle receptor FtsY	yes	GTPase activity [GO:0003924]; GTP binding [GO:0005525]	not assigned	membrane/cell wall					Nucleotide binding			Functional site
Q2FZ48	Q2FZ48_C311	AVPDAPHEALLULDATTGQNALSQAR	-0.284405	-0.206129	-0.326299	-0.0891599	-0.245267	ftsY	Signal recognition particle receptor FtsY	yes	GTPase activity [GO:0003924]; GTP binding [GO:0005525]	not assigned	membrane/cell wall
Q2FZ49	Q2FZ49_C913	LQVUHQDILAIENHYQDIK	-0.053898	-0.228621	-0.0601566	0.031254	-0.0570273	smc	Chromosome partition protein Smc	no	ATP binding [GO:0005524]; DNA binding [GO:0003677]	Gene expression and Nucleic acid binding
Q2FZ50	Q2FZ50_C95	ATIVUEPSLVIFANK	-0.352124	0.0662614	-0.186639	-0.064676	-0.125658	rnc	Ribonuclease 3	no	double-stranded RNA binding [GO:0003725]; metal ion binding [GO:0046872]; ribonuclease III activity [GO:0004525]; rRNA binding [GO:0019843]	Gene expression and Nucleic acid binding
Q2FZ53	Q2FZ53_C118	GVFNUIQK	-0.209006	-0.107931	-0.14018	-0.123987	-0.132084	SAOUHSC_01199	3-oxoacyl-(Acyl-carrier-protein) reductase, putative	yes	3-oxoacyl-[acyl-carrier-protein] reductase (NADPH) activity [GO:0004316]; 3-oxo-glutaryl-[acp] methyl ester reductase activity [GO:0102131]; 3-oxo-pimeloyl-[acp] methyl ester reductase activity [GO:0102132]; NAD binding [GO:0051287]	Enzyme
Q2FZ54	Q2FZ54_C144	GQLMAQAFPTGVGSMAAVLGLDFDKVDEIUK	-0.110635	0.0265876			-0.0420239	SAOUHSC_01198	Malonyl CoA-acyl carrier protein transacylase	yes	[acyl-carrier-protein] S-malonyltransferase activity [GO:0004314]	Enzyme
Q2FZ54	Q2FZ54_C161	IIEPANINUPGQIVVSGHK	0.214557	0.322194	0.227358	0.140189	0.220957	SAOUHSC_01198	Malonyl CoA-acyl carrier protein transacylase	yes	[acyl-carrier-protein] S-malonyltransferase activity [GO:0004314]	Enzyme
Q2FZ55	Q2FZ55_C55	IEFRHUSEK	-0.13895	-0.0671527	-0.0502173	-0.0764357	-0.0717942	plsX	Phosphate acyltransferase	yes	transferase activity, transferring acyl groups other than amino-acyl groups [GO:0016747]	Enzyme
Q2FZ55	Q2FZ55_C92	SGEADGUVSAGNTGALMSAGLFIVGR	-0.272036	-0.212902	-0.0623844	-0.0645403	-0.138721	plsX	Phosphate acyltransferase	yes	transferase activity, transferring acyl groups other than amino-acyl groups [GO:0016747]	Enzyme
Q2FZ56	Q2FZ56_C122	GHVLFAQANSLUVALIK	-0.628341	0.409255	-0.56435	-0.326679	-0.445514	fapR	Transcription factor FapR	no	DNA binding [GO:0003677]; DNA binding transcription factor activity [GO:0003700]; metal ion binding [GO:0046872]	Gene expression and Nucleic acid binding
Q2FZ58	Q2FZ58_C153	ANNTEDUIELMEYIIVK	-0.331118	-0.0641179	-0.0463995	0.0831112	-0.0552587	SAOUHSC_01193	Uncharacterized protein SAOUHSC_01193	no	glycerone kinase activity [GO:0004371]	Enzyme
Q2FZ58	Q2FZ58_C193	GLLUVYEGFLK	-0.35875	-0.0582626	-0.158494	0.0892269	-0.108378	SAOUHSC_01193	Uncharacterized protein SAOUHSC_01193	no	glycerone kinase activity [GO:0004371]	Enzyme
Q2FZ58	Q2FZ58_C240	IDKDEFVHDEHDFHGVINTEDIIYGYUTEMMVR	0.0423642	-0.497323	-0.448135	-0.0583528	-0.253244	SAOUHSC_01193	Uncharacterized protein SAOUHSC_01193	no	glycerone kinase activity [GO:0004371]	Enzyme
Q2FZ59	Q2FZ59_C30	AVEUYGIVGMASR	-0.169339	-0.295748	-0.240043	-0.101428	-0.204691	SAOUHSC_01192	Uncharacterized protein	no	0	not assigned
Q2FZ60	Q2FZ60_C5	QUFVTGR	0.316714	0.751992	1.32256	1.04624	0.899113	rpmB	50S ribosomal protein L28	yes	structural constituent of ribosome [GO:0003735]	Modulator/Scaffolding/Adaptor
Q2FZ61	Q2FZ61_C7	MHINLLUSDR	-0.210797	0.0392788	-0.158977	-0.0611196	-0.110048	SAOUHSC_01190	Uncharacterized protein	yes	ATP binding [GO:0005524]; thiamine binding [GO:0030975]; thiamine diphosphokinase activity [GO:0004788]	Enzyme
Q2FZ63	Q2FZ63_C244	NUNHIKEPNCNVK	0.146179	-0.126018	0.20541	-0.203224	0.0100804	rsgA	Small ribosomal subunit biogenesis GTPase RsgA	yes	GTPase activity [GO:0003924]; GTP binding [GO:0005525]; metal ion binding [GO:0046872]; rRNA binding [GO:0019843]	Gene expression and Nucleic acid binding								Metall binding	Functional site
Q2FZ63	Q2FZ63_C252	NCNHIKEPNUNVK	0.0184917	0.0473988	0.357721	0.0835197	0.0654593	rsgA	Small ribosomal subunit biogenesis GTPase RsgA	yes	GTPase activity [GO:0003924]; GTP binding [GO:0005525]; metal ion binding [GO:0046872]; rRNA binding [GO:0019843]	Gene expression and Nucleic acid binding								Metall binding	Functional site
Q2FZ65	Q2FZ65_C103	GMGTTUVCALVFEK	0.237931	0.385376	0.823831	0.862193	0.604603	SAOUHSC_01186	Uncharacterized protein	no	protein serine/threonine phosphatase activity [GO:0004722]	Enzyme
Q2FZ65	Q2FZ65_C36	DKNEDAGGIFYNQTNQQLLVLUDGMGGHK	-0.0997727	-0.0941408	-0.395075	-0.0159576	-0.0969568	SAOUHSC_01186	Uncharacterized protein	no	protein serine/threonine phosphatase activity [GO:0004722]	Enzyme
Q2FZ66	Q2FZ66_C131	IGUTFCASTLGGLKR						rlmN	Probable dual-specificity RNA methyltransferase RlmN	no	4 iron, 4 sulfur cluster binding [GO:0051539]; metal ion binding [GO:0046872]; rRNA (adenine-C2-)-methyltransferase activity [GO:0070040]; rRNA methyltransferase activity [GO:0008649]; tRNA methyltransferase activity [GO:0008175]	Gene expression and Nucleic acid binding								Metall binding	Functional site
Q2FZ66	Q2FZ66_C134	IGCTFUASTLGGLKR						rlmN	Probable dual-specificity RNA methyltransferase RlmN	no	4 iron, 4 sulfur cluster binding [GO:0051539]; metal ion binding [GO:0046872]; rRNA (adenine-C2-)-methyltransferase activity [GO:0070040]; rRNA methyltransferase activity [GO:0008649]; tRNA methyltransferase activity [GO:0008175]	Gene expression and Nucleic acid binding								Metall binding	Functional site
Q2FZ66	Q2FZ66_C300	GLNUHVNLIPVNHVPER	0.349479	0.627607	0.316146	0.525468	0.437473	rlmN	Probable dual-specificity RNA methyltransferase RlmN	no	4 iron, 4 sulfur cluster binding [GO:0051539]; metal ion binding [GO:0046872]; rRNA (adenine-C2-)-methyltransferase activity [GO:0070040]; rRNA methyltransferase activity [GO:0008649]; tRNA methyltransferase activity [GO:0008175]	Gene expression and Nucleic acid binding
Q2FZ67	Q2FZ67_C211	LQDEGYDVEKDHDLPYULHIGGQPIIHSR	-0.137775	-0.142353	0.355918		-0.137775	SAOUHSC_01184	16S rRNA (cytosine(967)-C(5))-methyltransferase	no	RNA binding [GO:0003723]; rRNA (cytosine-C5-)-methyltransferase activity [GO:0009383]	Gene expression and Nucleic acid binding
Q2FZ67	Q2FZ67_C256	HDHVLDAUSAPGGK	-0.173694	-0.00467137		0.0997665	-0.00467137	SAOUHSC_01184	16S rRNA (cytosine(967)-C(5))-methyltransferase	no	RNA binding [GO:0003723]; rRNA (cytosine-C5-)-methyltransferase activity [GO:0009383]	Gene expression and Nucleic acid binding
Q2FZ67	Q2FZ67_C264	AUHIAEVLMPEGQVDASDIHDHK	0.0952166	0.0562783	0.366252	-0.0242084	0.0757475	SAOUHSC_01184	16S rRNA (cytosine(967)-C(5))-methyltransferase	no	RNA binding [GO:0003723]; rRNA (cytosine-C5-)-methyltransferase activity [GO:0009383]	Gene expression and Nucleic acid binding
Q2FZ67	Q2FZ67_C325	ILVDAPUSGLGVMR	-0.0446277	0.0173518	-0.0520272	0.107152	-0.0136379	SAOUHSC_01184	16S rRNA (cytosine(967)-C(5))-methyltransferase	no	RNA binding [GO:0003723]; rRNA (cytosine-C5-)-methyltransferase activity [GO:0009383]	Gene expression and Nucleic acid binding				Binding site					Functional site
Q2FZ67	Q2FZ67_C375	IGGEIIYSTUTIEQLENENVIYTFLK	-0.131155	-0.121079	-0.14229	-0.224907	-0.136722	SAOUHSC_01184	16S rRNA (cytosine(967)-C(5))-methyltransferase	no	RNA binding [GO:0003723]; rRNA (cytosine-C5-)-methyltransferase activity [GO:0009383]	Gene expression and Nucleic acid binding			Active site						Functional site
Q2FZ69	Q2FZ69_C16	HUNEFINHSNDSNLSSSHDVDESSTK	-0.117093	0.304978	-0.114805	0.371057	0.0950866	SAOUHSC_01173	Uncharacterized protein	no	0	not assigned
Q2FZ70	Q2FZ70_C35	SPIYUDNR	-0.200557	-0.0670408	-0.199958	-0.0392786	-0.133499	pyrE	Orotate phosphoribosyltransferase	no	magnesium ion binding [GO:0000287]; orotate phosphoribosyltransferase activity [GO:0004588]	Enzyme
Q2FZ71	Q2FZ71_C155	LANAAGLDGVVUSPLESR	-0.224739	-0.0993708	-0.13695	-0.0669562	-0.11816	pyrF	Orotidine 5'-phosphate decarboxylase	no	orotidine-5'-phosphate decarboxylase activity [GO:0004590]	Enzyme
Q2FZ72	Q2FZ72_C1033	TTVENGIPULTSLDTANALTNVIESMTFTMR	-0.116176	0.0518593		0.20063	0.0518593	carB	Carbamoyl-phosphate synthase large chain	no	ATP binding [GO:0005524]; carbamoyl-phosphate synthase (ammonia) activity [GO:0004087]; carbamoyl-phosphate synthase (glutamine-hydrolyzing) activity [GO:0004088]; metal ion binding [GO:0046872]	Enzyme
Q2FZ72	Q2FZ72_C281	ALGIEGGUNVQLALDPHSFDYYIIEVNPR	-0.340587	0.0333701		0.205768	0.0333701	carB	Carbamoyl-phosphate synthase large chain	no	ATP binding [GO:0005524]; carbamoyl-phosphate synthase (ammonia) activity [GO:0004087]; carbamoyl-phosphate synthase (glutamine-hydrolyzing) activity [GO:0004088]; metal ion binding [GO:0046872]	Enzyme								Metall binding	Functional site
Q2FZ72	Q2FZ72_C34	TILVIGSGPIIIGQAAEFDYAGTQAULALK	-0.205766	-0.131849	-0.157464	0.107822	-0.144656	carB	Carbamoyl-phosphate synthase large chain	no	ATP binding [GO:0005524]; carbamoyl-phosphate synthase (ammonia) activity [GO:0004087]; carbamoyl-phosphate synthase (glutamine-hydrolyzing) activity [GO:0004088]; metal ion binding [GO:0046872]	Enzyme
Q2FZ72	Q2FZ72_C525	MVDTUAAEFESSTPYYYGTYETENESIVTDKEK	-0.125777	0.078883	0.126444	0.225152	0.102664	carB	Carbamoyl-phosphate synthase large chain	no	ATP binding [GO:0005524]; carbamoyl-phosphate synthase (ammonia) activity [GO:0004087]; carbamoyl-phosphate synthase (glutamine-hydrolyzing) activity [GO:0004088]; metal ion binding [GO:0046872]	Enzyme
Q2FZ72	Q2FZ72_C759	EIEVDAIUDGETVIIPGIMEHIER	-0.278671	-0.162247	-0.0208688	-0.0789508	-0.120599	carB	Carbamoyl-phosphate synthase large chain	no	ATP binding [GO:0005524]; carbamoyl-phosphate synthase (ammonia) activity [GO:0004087]; carbamoyl-phosphate synthase (glutamine-hydrolyzing) activity [GO:0004088]; metal ion binding [GO:0046872]	Enzyme						Nucleotide binding			Functional site
Q2FZ73	Q2FZ73_C248	IPFFGIULGHQLFALSQGASSFK	0.200755	0.307895	0.634779	0.389457	0.348676	carA	Carbamoyl-phosphate synthase small chain	no	ATP binding [GO:0005524]; carbamoyl-phosphate synthase (glutamine-hydrolyzing) activity [GO:0004088]	Enzyme			Active site						Functional site
Q2FZ74	Q2FZ74_C178	AIVAHUEDNSLIYGGAMHEGK	-0.356642	-0.0981349	0.0388576	-0.0505174	-0.0743261	pyrC	Dihydroorotase	no	allantoinase activity [GO:0004038]; dihydroorotase activity [GO:0004151]; zinc ion binding [GO:0008270]	Enzyme								Metall binding	Functional site
Q2FZ74	Q2FZ74_C207	ELGIPGIPNIUESVQIAR	-0.301454	-0.0223895	-0.120745	0.0464428	-0.0715673	pyrC	Dihydroorotase	no	allantoinase activity [GO:0004038]; dihydroorotase activity [GO:0004151]; zinc ion binding [GO:0008270]	Enzyme
Q2FZ74	Q2FZ74_C224	DVLLAEAAGUHYHVCHVSTK	-0.295854	-0.20425	0.00345832	-0.0981812	-0.151215	pyrC	Dihydroorotase	no	allantoinase activity [GO:0004038]; dihydroorotase activity [GO:0004151]; zinc ion binding [GO:0008270]	Enzyme
Q2FZ74	Q2FZ74_C229	DVLLAEAAGCHYHVUHVSTK						pyrC	Dihydroorotase	no	allantoinase activity [GO:0004038]; dihydroorotase activity [GO:0004151]; zinc ion binding [GO:0008270]	Enzyme								Metall binding	Functional site
Q2FZ74	Q2FZ74_C299	EALLEGLLDGTIDUIATDHAPHAR	-0.303258	-0.106218	0.00803735	0.107808	-0.0490905	pyrC	Dihydroorotase	no	allantoinase activity [GO:0004038]; dihydroorotase activity [GO:0004151]; zinc ion binding [GO:0008270]	Enzyme			Active site					Metall binding	Functional site
Q2FZ74	Q2FZ74_C88	GGFTTVUPMPNTR	-0.174377	-0.399695	-0.01613	-0.0359341	-0.105156	pyrC	Dihydroorotase	no	allantoinase activity [GO:0004038]; dihydroorotase activity [GO:0004151]; zinc ion binding [GO:0008270]	Enzyme				Binding site					Functional site
Q2FZ75	Q2FZ75_C53	TKUSFEMAELK	-0.286269	-0.146515	-0.0141644	-0.165661	-0.156088	pyrB	Aspartate carbamoyltransferase	no	amino acid binding [GO:0016597]; aspartate carbamoyltransferase activity [GO:0004070]	Enzyme
Q2FZ75	Q2FZ75_C86	GESLYDTUK	-0.236213	-0.20306	-0.0366521	-0.0701161	-0.136588	pyrB	Aspartate carbamoyltransferase	no	amino acid binding [GO:0016597]; aspartate carbamoyltransferase activity [GO:0004070]	Enzyme
Q2FZ75	Q2FZ75_C94	TLESIGUDLLVIR	-0.0773737	-0.0994847	0.0581086	0.104873	-0.00963253	pyrB	Aspartate carbamoyltransferase	no	amino acid binding [GO:0016597]; aspartate carbamoyltransferase activity [GO:0004070]	Enzyme
Q2FZ78	Q2FZ78_C227	DYTLVEUQLETGR	-0.202124	-0.0105947	0.0746766	-0.0286992	-0.019647	SAOUHSC_01163	Pseudouridine synthase	no	pseudouridine synthase activity [GO:0009982]; RNA binding [GO:0003723]	Gene expression and Nucleic acid binding
Q2FZ82	Q2FZ82_C124	EKUKEFALEQIELQK	-0.490618	-0.616459			-0.553539	ileS	Isoleucine--tRNA ligase	yes	aminoacyl-tRNA editing activity [GO:0002161]; ATP binding [GO:0005524]; isoleucine-tRNA ligase activity [GO:0004822]; metal ion binding [GO:0046872]; tRNA binding [GO:0000049]	Gene expression and Nucleic acid binding
Q2FZ82	Q2FZ82_C323	ESLVINGDHVTTDAGTGUVHTAPGHGEDDYIVGQK	0.0313952	-0.179384	-0.033289	0.0897693	-0.000946899	ileS	Isoleucine--tRNA ligase	yes	aminoacyl-tRNA editing activity [GO:0002161]; ATP binding [GO:0005524]; isoleucine-tRNA ligase activity [GO:0004822]; metal ion binding [GO:0046872]; tRNA binding [GO:0000049]	Gene expression and Nucleic acid binding
Q2FZ82	Q2FZ82_C886	LDDQATAYEHGDIVIEHADGEKUER	-0.174809	0.164184	0.148138	0.132873	0.140505	ileS	Isoleucine--tRNA ligase	yes	aminoacyl-tRNA editing activity [GO:0002161]; ATP binding [GO:0005524]; isoleucine-tRNA ligase activity [GO:0004822]; metal ion binding [GO:0046872]; tRNA binding [GO:0000049]	Gene expression and Nucleic acid binding								Metall binding	Functional site
Q2FZ82	Q2FZ82_C906	CWNYSEDLGAVDELTHLUPR	-0.216166	-0.220984	0.067501	-0.00643432	-0.1113	ileS	Isoleucine--tRNA ligase	yes	aminoacyl-tRNA editing activity [GO:0002161]; ATP binding [GO:0005524]; isoleucine-tRNA ligase activity [GO:0004822]; metal ion binding [GO:0046872]; tRNA binding [GO:0000049]	Gene expression and Nucleic acid binding								Metall binding	Functional site
Q2FZ86	Q2FZ86_C101	MULFEPR	-0.182917	-0.100608	0.0209111	0.0110662	-0.0447708	sepF	Cell division protein SepF	yes	0	not assigned
Q2FZ86	Q2FZ86_C164	VGTDIFLUTPDNVEVAGSITDHIENMEHSFD	-0.32858	-0.12688			-0.22773	sepF	Cell division protein SepF	yes	0	not assigned
Q2FZ87	Q2FZ87_C114	IKUFLQVNVSGEASK	-0.13914	0.270589	-0.410927	-0.121377	-0.130259	SAOUHSC_01153	Pyridoxal phosphate homeostasis protein	no	pyridoxal phosphate binding [GO:0030170]	not assigned
Q2FZ87	Q2FZ87_C189	LNLEYAPUDELSMGMSNDYLIAVEEGATFVR	-0.0193751	0.136585	0.253263	0.0409625	0.0887739	SAOUHSC_01153	Pyridoxal phosphate homeostasis protein	no	pyridoxal phosphate binding [GO:0030170]	not assigned
Q2FZ92	Q2FZ92_C221	NQTEEDYLIUNYHQR	-0.344282	-0.177719	-0.235008	-0.037873	-0.206364	murD	UDP-N-acetylmuramoylalanine--D-glutamate ligase	yes	ATP binding [GO:0005524]; UDP-N-acetylmuramoylalanine-D-glutamate ligase activity [GO:0008764]	Enzyme
Q2FZ92	Q2FZ92_C350	ATNTLATQFALNSFNQPIIWLUGGLDR	-0.0738184	-0.0883928	0.0380147	0.0211954	-0.0263115	murD	UDP-N-acetylmuramoylalanine--D-glutamate ligase	yes	ATP binding [GO:0005524]; UDP-N-acetylmuramoylalanine-D-glutamate ligase activity [GO:0008764]	Enzyme
Q2FZ92	Q2FZ92_C422	VQDIIEPNDVVLLSPAUASWDQYSTFEER	-0.179221	0.0701145			-0.054553	murD	UDP-N-acetylmuramoylalanine--D-glutamate ligase	yes	ATP binding [GO:0005524]; UDP-N-acetylmuramoylalanine-D-glutamate ligase activity [GO:0008764]	Enzyme
Q2FZB0	Q2FZB0_C187	NNVANALMQGAAIMGMNFHLVUPK	-0.375609	0.430606	0.519542	-0.083875	0.173366	argF	Ornithine carbamoyltransferase	no	amino acid binding [GO:0016597]; ornithine carbamoyltransferase activity [GO:0004585]	Enzyme
Q2FZC4	Q2FZC4_C100	GLELGULFAFYGHTHVAK	-0.13976	0.287827	0.292546	0.0395596	0.163693	SAOUHSC_01108	Phosphoesterase	no	hydrolase activity [GO:0016787]; zinc ion binding [GO:0008270]	not assigned
Q2FZC5	Q2FZC5_C117	AQFVUVISMSGPDMETK	-0.325232	-0.319712	-0.107011	-0.0664123	-0.213361	SAOUHSC_01107	dITP/XTP pyrophosphatase	no	metal ion binding [GO:0046872]; nucleoside-triphosphatase activity [GO:0017111]; nucleoside-triphosphate diphosphatase activity [GO:0047429]; nucleotide binding [GO:0000166]	Enzyme
Q2FZC6	Q2FZC6_C143	INPHVEVHGVAUPGFVPLVEQMR	0.243292	0.44301	0.596363	0.414352	0.428681	murI	Glutamate racemase	yes	glutamate racemase activity [GO:0008881]	Enzyme
Q2FZC6	Q2FZC6_C184	NSESDTVILGUTHYPLLYKPIYDYFGGK	-0.0795847	-0.118711			-0.099148	murI	Glutamate racemase	yes	glutamate racemase activity [GO:0008881]	Enzyme			Active site						Functional site
Q2FZC6	Q2FZC6_C72	MLVIAUNTATAVALEYLQK	-0.36086	-0.0242671	-0.250646	-0.102341	-0.176494	murI	Glutamate racemase	yes	glutamate racemase activity [GO:0008881]	Enzyme			Active site						Functional site
Q2FZC7	Q2FZC7_C100	QSUSAIVDQLEQPIR	0.136578	0.372885	0.453805	0.630375	0.413345	SAOUHSC_01105	Iron-sulphur subunit of succinate dehydrogenase, putative	no	electron transfer activity [GO:0009055]; iron-sulfur cluster binding [GO:0051536]	not assigned	membrane/cell wall
Q2FZC7	Q2FZC7_C174	CMTUGVCLEVCPNVTENNK	-0.21517	0.0414104	0.183289	0.252412	0.11235	SAOUHSC_01105	Iron-sulphur subunit of succinate dehydrogenase, putative	no	electron transfer activity [GO:0009055]; iron-sulfur cluster binding [GO:0051536]	not assigned	membrane/cell wall
Q2FZC7	Q2FZC7_C181	CMTCGVCLEVUPNVTENNK	0.410558		-0.677495		-0.133468	SAOUHSC_01105	Iron-sulphur subunit of succinate dehydrogenase, putative	no	electron transfer activity [GO:0009055]; iron-sulfur cluster binding [GO:0051536]	not assigned	membrane/cell wall
Q2FZC7	Q2FZC7_C228	LNALMGTGGLQQUGNSQNCVNACPK	-0.103829	0.0754642	0.200881	0.393416	0.138173	SAOUHSC_01105	Iron-sulphur subunit of succinate dehydrogenase, putative	no	electron transfer activity [GO:0009055]; iron-sulfur cluster binding [GO:0051536]	not assigned	membrane/cell wall
Q2FZC7	Q2FZC7_C234	LNALMGTGGLQQCGNSQNUVNACPK		-0.0872428	0.200881		0.0568191	SAOUHSC_01105	Iron-sulphur subunit of succinate dehydrogenase, putative	no	electron transfer activity [GO:0009055]; iron-sulfur cluster binding [GO:0051536]	not assigned	membrane/cell wall
Q2FZC7	Q2FZC7_C238	LNALMGTGGLQQCGNSQNCVNAUPK						SAOUHSC_01105	Iron-sulphur subunit of succinate dehydrogenase, putative	no	electron transfer activity [GO:0009055]; iron-sulfur cluster binding [GO:0051536]	not assigned	membrane/cell wall
Q2FZC7	Q2FZC7_C55	ENLNVIAULMEIR	0.0322419	0.314174	0.286408	0.394843	0.300291	SAOUHSC_01105	Iron-sulphur subunit of succinate dehydrogenase, putative	no	electron transfer activity [GO:0009055]; iron-sulfur cluster binding [GO:0051536]	not assigned	membrane/cell wall
Q2FZC8	Q2FZC8_C296	EIFDVUINQK	-0.556966	-0.175257	-0.238868	-0.127305	-0.207062	SAOUHSC_01104	Succinate dehydrogenase, flavoprotein chain TC0881, putative	no	electron transfer activity [GO:0009055]; oxidoreductase activity [GO:0016491]; succinate dehydrogenase activity [GO:0000104]	Enzyme
Q2FZC8	Q2FZC8_C377	GLFAAGEUDFSQHGGNR	-0.47323	-0.086538	0.0094905	-0.0958512	-0.0911946	SAOUHSC_01104	Succinate dehydrogenase, flavoprotein chain TC0881, putative	no	electron transfer activity [GO:0009055]; oxidoreductase activity [GO:0016491]; succinate dehydrogenase activity [GO:0000104]	Enzyme
Q2FZC8	Q2FZC8_C44	SHSVUAQGGINGAVNTK	-0.630148	-0.0871356	0.434455	-0.122319	-0.104727	SAOUHSC_01104	Succinate dehydrogenase, flavoprotein chain TC0881, putative	no	electron transfer activity [GO:0009055]; oxidoreductase activity [GO:0016491]; succinate dehydrogenase activity [GO:0000104]	Enzyme
Q2FZD0	Q2FZD0_C21	LNVVPMEPGUYLMK	0.0132121	-0.174703			-0.0807454	uvrC	UvrABC system protein C	no	excinuclease ABC activity [GO:0009381]	Gene expression and Nucleic acid binding
Q2FZD2	Q2FZD2_C29	VTDADFDSKVESGVQLVDFWATWUGPCK	0.588709	0.166587	-0.337503		0.166587	trxA	Thioredoxin	yes	oxidoreductase activity, acting on a sulfur group of donors, disulfide as acceptor [GO:0016671]; protein disulfide oxidoreductase activity [GO:0015035]; protein-disulfide reductase activity [GO:0047134]; thioredoxin-disulfide reductase activity [GO:0004791]	Enzyme
Q2FZD2	Q2FZD2_C32	VESGVQLVDFWATWCGPUK	-0.0888328	0.0925168	-0.194074	0.335741	0.00184202	trxA	Thioredoxin	yes	oxidoreductase activity, acting on a sulfur group of donors, disulfide as acceptor [GO:0016671]; protein disulfide oxidoreductase activity [GO:0015035]; protein-disulfide reductase activity [GO:0047134]; thioredoxin-disulfide reductase activity [GO:0004791]	Enzyme
Q2FZD4	Q2FZD4_C120	ASLQVAUENGK	-0.0825912	-0.212751			-0.147671	SAOUHSC_01098	DNA-dependent DNA polymerase beta chain, putative	no	DNA binding [GO:0003677]; DNA-directed DNA polymerase activity [GO:0003887]; hydrolase activity [GO:0016787]	Gene expression and Nucleic acid binding
Q2FZD8	Q2FZD8_C120	SEGMIUSLQEIGISSNYIPK	-0.127195	-0.187461	-0.2162	-0.0253826	-0.157328	pheT	Phenylalanine--tRNA ligase beta subunit	yes	ATP binding [GO:0005524]; magnesium ion binding [GO:0000287]; phenylalanine-tRNA ligase activity [GO:0004826]; tRNA binding [GO:0000049]	Gene expression and Nucleic acid binding
Q2FZD9	Q2FZD9_C194	IIUPGKVYR	-0.204948	-0.0107592	-0.0415508	-0.119213	-0.0803817	pheS	Phenylalanine--tRNA ligase alpha subunit	yes	ATP binding [GO:0005524]; metal ion binding [GO:0046872]; phenylalanine-tRNA ligase activity [GO:0004826]; tRNA binding [GO:0000049]	Gene expression and Nucleic acid binding
Q2FZD9	Q2FZD9_C267	LRPSYFPFTEPSVEVDVSUFK	-0.500524	-0.498077	-0.205098	-0.247183	-0.37263	pheS	Phenylalanine--tRNA ligase alpha subunit	yes	ATP binding [GO:0005524]; metal ion binding [GO:0046872]; phenylalanine-tRNA ligase activity [GO:0004826]; tRNA binding [GO:0000049]	Gene expression and Nucleic acid binding
Q2FZD9	Q2FZD9_C278	GKGCNVUK	-0.326335	-0.0761586	0.230695	0.0316775	-0.0222406	pheS	Phenylalanine--tRNA ligase alpha subunit	yes	ATP binding [GO:0005524]; metal ion binding [GO:0046872]; phenylalanine-tRNA ligase activity [GO:0004826]; tRNA binding [GO:0000049]	Gene expression and Nucleic acid binding
Q2FZF1	Q2FZF1_C44	LSHRVUK	-0.159444	0.169155	0.302173	0.0855606	0.127358	rpmF	50S ribosomal protein L32	yes	structural constituent of ribosome [GO:0003735]	Modulator/Scaffolding/Adaptor
Q2FZF1	Q2FZF1_C47	NUGSYNGEEVAAK	0.0977456	0.19862	0.0825664	0.166458	0.132102	rpmF	50S ribosomal protein L32	yes	structural constituent of ribosome [GO:0003735]	Modulator/Scaffolding/Adaptor
Q2FZF3	Q2FZF3_C66	STEVVADIHITGTYTMPUAR	-0.107337	-0.0214675	-0.145031	0.0988238	-0.0644023	SAOUHSC_01077	Uncharacterized protein	yes	0	not assigned
Q2FZF5	Q2FZF5_C36	STDRFDEIHVUVLK	-0.223391	0.0756011	-0.0916328	-0.132024	-0.111829	coaD	Phosphopantetheine adenylyltransferase	yes	ATP binding [GO:0005524]; pantetheine-phosphate adenylyltransferase activity [GO:0004595]	Enzyme
Q2FZF5	Q2FZF5_C79	VHQFSGLLVDYUEQVGAK	-0.316169	-0.392876		-0.249479	-0.316169	coaD	Phosphopantetheine adenylyltransferase	yes	ATP binding [GO:0005524]; pantetheine-phosphate adenylyltransferase activity [GO:0004595]	Enzyme				Binding site					Functional site
Q2FZF6	Q2FZF6_C123	ENGIIVUEFSNHEEIDYQPFNMIK	-0.214056			-0.0938483	-0.153952	SAOUHSC_01074	Uncharacterized protein	no	methyltransferase activity [GO:0008168]; nucleic acid binding [GO:0003676]	Gene expression and Nucleic acid binding
Q2FZG6	Q2FZG6_C111	IVSHSVQEAYLPTGEGULSVDDNVAGLVHR	0.201006	0.0564448	-0.328525	-0.22425	-0.0839025	def	Peptide deformylase	yes	metal ion binding [GO:0046872]; peptide deformylase activity [GO:0042586]	Enzyme								Metall binding	Functional site
Q2FZG9	Q2FZG9_C191	MAQLGEEGVLULLSDSTNSLVPDFTLSER	-0.248485	-0.197583	-0.16288	-0.0257056	-0.180232	rnj1	Ribonuclease J 1	yes	5'-3' exoribonuclease activity [GO:0004534]; endoribonuclease activity [GO:0004521]; RNA binding [GO:0003723]; zinc ion binding [GO:0008270]	Gene expression and Nucleic acid binding
Q2FZG9	Q2FZG9_C297	HELLILUTGSQGEPMAALSR	-0.305295	-0.126929	-0.144664	-0.117678	-0.135796	rnj1	Ribonuclease J 1	yes	5'-3' exoribonuclease activity [GO:0004534]; endoribonuclease activity [GO:0004521]; RNA binding [GO:0003723]; zinc ion binding [GO:0008270]	Gene expression and Nucleic acid binding
Q2FZG9	Q2FZG9_C406	AHGETGVEUGVEEDNVFIFDIGDVLALTHDSAR	-0.128819	-0.0189511	0.115433	0.0478175	0.0144332	rnj1	Ribonuclease J 1	yes	5'-3' exoribonuclease activity [GO:0004534]; endoribonuclease activity [GO:0004521]; RNA binding [GO:0003723]; zinc ion binding [GO:0008270]	Gene expression and Nucleic acid binding
Q2FZH4	Q2FZH4_C12	SEIIVYTQNDUPPCTFVK	-0.18413	-0.137965	0.258579	0.321466	0.060307	SAOUHSC_01030	Uncharacterized protein	no	electron transfer activity [GO:0009055]; protein disulfide oxidoreductase activity [GO:0015035]	Enzyme
Q2FZH5	Q2FZH5_C365	LULAQQDIFRPQLR	-0.273814	-0.0797067	-0.191162	0.111699	-0.135434	SAOUHSC_01029	Phosphoenolpyruvate-protein phosphotransferase	no	kinase activity [GO:0016301]; metal ion binding [GO:0046872]; phosphoenolpyruvate-protein phosphotransferase activity [GO:0008965]	Enzyme
Q2FZH5	Q2FZH5_C557	AVDUATQEEVIELVNNYVK	-0.30308	-0.263317	-0.0966532	-0.0362152	-0.179985	SAOUHSC_01029	Phosphoenolpyruvate-protein phosphotransferase	no	kinase activity [GO:0016301]; metal ion binding [GO:0046872]; phosphoenolpyruvate-protein phosphotransferase activity [GO:0008965]	Enzyme
Q2FZH7	Q2FZH7_C172	DHIQKUENVIK	-0.1821	-0.234906	0.156008	0.0200577	-0.0810213	SAOUHSC_01027	Uncharacterized protein	no	0	not assigned
Q2FZH8	Q2FZH8_C331	LINGALNILSSEGTLLLUTNASVYPLK	-0.221287	0.138421	0.365469	0.19131	0.164866	SAOUHSC_01026	Uncharacterized protein	no	methyltransferase activity [GO:0008168]; RNA binding [GO:0003723]	Gene expression and Nucleic acid binding
Q2FZI3	Q2FZI3_C40	VLLLGPSGUGK	0.322274	0.625364	0.0848807	0.258097	0.290186	SAOUHSC_01021	Uncharacterized protein	no	ATPase activity [GO:0016887]; ATP binding [GO:0005524]	not assigned						Nucleotide binding			Functional site
Q2FZI5	Q2FZI5_C137	DALTYIENUELPVVVK	-0.220328	-0.358842	-0.463788	-0.139919	-0.289585	purD	Phosphoribosylamine--glycine ligase	no	ATP binding [GO:0005524]; metal ion binding [GO:0046872]; phosphoribosylamine-glycine ligase activity [GO:0004637]	Enzyme
Q2FZI5	Q2FZI5_C230	AFDHDEGPNTGGMGAYUPVPHISDDVLK	-0.219018	-0.119557	0.159112	-0.0508013	-0.0851793	purD	Phosphoribosylamine--glycine ligase	no	ATP binding [GO:0005524]; metal ion binding [GO:0046872]; phosphoribosylamine-glycine ligase activity [GO:0004637]	Enzyme
Q2FZI6	Q2FZI6_C260	HMNPUGVGIGDTIEQAFQHAYEADSQSIFGGIVALNR	0.208517	0.232047	0.364236	0.265677	0.248862	purH	Bifunctional purine biosynthesis protein PurH	no	IMP cyclohydrolase activity [GO:0003937]; phosphoribosylaminoimidazolecarboxamide formyltransferase activity [GO:0004643]	Enzyme
Q2FZI7	Q2FZI7_C156	KUDIRPDDSK	-0.103671	-0.151649	-0.104949	0.147106	-0.10431	purN	Phosphoribosylglycinamide formyltransferase	no	phosphoribosylglycinamide formyltransferase activity [GO:0004644]	Enzyme
Q2FZI7	Q2FZI7_C44	LENIEVTALYTDHQNAFUIDR	-0.0535236	-0.000634926	-0.37314	-0.243643	-0.148583	purN	Phosphoribosylglycinamide formyltransferase	no	phosphoribosylglycinamide formyltransferase activity [GO:0004644]	Enzyme
Q2FZI9	Q2FZI9_C110	GIENIQPFLYHFYDMSVGIUHNGNLINAK	-0.178192	-0.0301477	0.255924	0.072586	0.0212192	purF	Amidophosphoribosyltransferase	no	amidophosphoribosyltransferase activity [GO:0004044]; magnesium ion binding [GO:0000287]	Enzyme
Q2FZJ0	Q2FZJ0_C164	GIGGYGNUIGIPTTAGEIEFDER	-0.0085226	0.0110662		0.400101	0.0110662	purL	Phosphoribosylformylglycinamidine synthase subunit PurL	no	ATP binding [GO:0005524]; metal ion binding [GO:0046872]; phosphoribosylformylglycinamidine synthase activity [GO:0004642]	Enzyme
Q2FZJ0	Q2FZJ0_C32	VUDILGR	-0.117328	-0.0453741	0.0417409	0.169721	-0.0018166	purL	Phosphoribosylformylglycinamidine synthase subunit PurL	no	ATP binding [GO:0005524]; metal ion binding [GO:0046872]; phosphoribosylformylglycinamidine synthase activity [GO:0004642]	Enzyme
Q2FZJ0	Q2FZJ0_C496	NLIAVGATPLAMTDULNYGSPEKK	0.064331	0.141433	0.302524	0.227125	0.184279	purL	Phosphoribosylformylglycinamidine synthase subunit PurL	no	ATP binding [GO:0005524]; metal ion binding [GO:0046872]; phosphoribosylformylglycinamidine synthase activity [GO:0004642]	Enzyme				Binding site					Functional site
Q2FZJ0	Q2FZJ0_C522	GMAEAUDILK	0.0524159	0.0635029	0.225892	0.123004	0.0932534	purL	Phosphoribosylformylglycinamidine synthase subunit PurL	no	ATP binding [GO:0005524]; metal ion binding [GO:0046872]; phosphoribosylformylglycinamidine synthase activity [GO:0004642]	Enzyme
Q2FZJ0	Q2FZJ0_C55	QPNFTETGIFSVMWSEHUSYK	-0.0694065	0.0913952	0.0526941	-0.00259919	0.0250475	purL	Phosphoribosylformylglycinamidine synthase subunit PurL	no	ATP binding [GO:0005524]; metal ion binding [GO:0046872]; phosphoribosylformylglycinamidine synthase activity [GO:0004642]	Enzyme			Active site	Binding site					Functional site
Q2FZJ0	Q2FZJ0_C724	QIWEGAIAQULTTQD	0.00144197	0.141171	0.0170667	0.217851	0.0791189	purL	Phosphoribosylformylglycinamidine synthase subunit PurL	no	ATP binding [GO:0005524]; metal ion binding [GO:0046872]; phosphoribosylformylglycinamidine synthase activity [GO:0004642]	Enzyme
Q2FZJ1	Q2FZJ1_C13	FAVLVFPGSNUDR	0.486457	-0.225519	0.750349	0.857105	0.618403	purQ	Phosphoribosylformylglycinamidine synthase subunit PurQ	no	ATP binding [GO:0005524]; glutaminase activity [GO:0004359]; phosphoribosylformylglycinamidine synthase activity [GO:0004642]	Enzyme
Q2FZJ1	Q2FZJ1_C148	VIYPVAHGEGHYYUTDEIYQQLK	0.148869	0.21661	0.282973	0.427177	0.249792	purQ	Phosphoribosylformylglycinamidine synthase subunit PurQ	no	ATP binding [GO:0005524]; glutaminase activity [GO:0004359]; phosphoribosylformylglycinamidine synthase activity [GO:0004642]	Enzyme
Q2FZJ1	Q2FZJ1_C188	GNVUGMMPHPER	0.138945	0.255561	0.504671	0.386921	0.321241	purQ	Phosphoribosylformylglycinamidine synthase subunit PurQ	no	ATP binding [GO:0005524]; glutaminase activity [GO:0004359]; phosphoribosylformylglycinamidine synthase activity [GO:0004642]	Enzyme			Active site						Functional site
Q2FZJ3	Q2FZJ3_C196	TETGQILLADEISPDTUR	-0.247662	-0.0390435	-0.0471893	0.0166585	-0.0431164	purC	Phosphoribosylaminoimidazole-succinocarboxamide synthase	no	ATP binding [GO:0005524]; phosphoribosylaminoimidazolesuccinocarboxamide synthase activity [GO:0004639]	Enzyme
Q2FZJ4	Q2FZJ4_C180	LIETSEUVAEK	-0.312903	0.0213376	-0.104061	0.0149265	-0.0445675	purK	N5-carboxyaminoimidazole ribonucleotide synthase	no	5-(carboxyamino)imidazole ribonucleotide synthase activity [GO:0034028]; ATP binding [GO:0005524]; metal ion binding [GO:0046872]; NAD binding [GO:0051287]; phosphoribosylaminoimidazole carboxylase activity [GO:0004638]	Enzyme						Nucleotide binding			Functional site
Q2FZJ4	Q2FZJ4_C44	VVVLDPSEDUPCR	0.0371713	0.303693	0.505688	0.237319	0.270506	purK	N5-carboxyaminoimidazole ribonucleotide synthase	no	5-(carboxyamino)imidazole ribonucleotide synthase activity [GO:0034028]; ATP binding [GO:0005524]; metal ion binding [GO:0046872]; NAD binding [GO:0051287]; phosphoribosylaminoimidazole carboxylase activity [GO:0004638]	Enzyme
Q2FZJ4	Q2FZJ4_C46	VVVLDPSEDCPUR	0.139208	-0.123355	0.298893	0.184725	0.161966	purK	N5-carboxyaminoimidazole ribonucleotide synthase	no	5-(carboxyamino)imidazole ribonucleotide synthase activity [GO:0034028]; ATP binding [GO:0005524]; metal ion binding [GO:0046872]; NAD binding [GO:0051287]; phosphoribosylaminoimidazole carboxylase activity [GO:0004638]	Enzyme
Q2FZJ4	Q2FZJ4_C71	ALNQLGQKUDVITYEFENISAQQLK	-0.135412	-0.0108174	-0.138172	-0.13641	-0.135911	purK	N5-carboxyaminoimidazole ribonucleotide synthase	no	5-(carboxyamino)imidazole ribonucleotide synthase activity [GO:0034028]; ATP binding [GO:0005524]; metal ion binding [GO:0046872]; NAD binding [GO:0051287]; phosphoribosylaminoimidazole carboxylase activity [GO:0004638]	Enzyme
Q2FZJ4	Q2FZJ4_C90	LLUEKYNIPQGYQAIQLLQDR						purK	N5-carboxyaminoimidazole ribonucleotide synthase	no	5-(carboxyamino)imidazole ribonucleotide synthase activity [GO:0034028]; ATP binding [GO:0005524]; metal ion binding [GO:0046872]; NAD binding [GO:0051287]; phosphoribosylaminoimidazole carboxylase activity [GO:0004638]	Enzyme
Q2FZJ6	Q2FZJ6_C140	LYIDEQTFVPUTPLGIMEILK	-0.103395	0.16633	0.00129784	0.0270125	0.0141552	folD	Bifunctional protein FolD	no	methenyltetrahydrofolate cyclohydrolase activity [GO:0004477]; methylenetetrahydrofolate dehydrogenase (NADP+) activity [GO:0004488]	Enzyme
Q2FZK7	Q2FZK7_C230	YKPQVNSSINDYIUK	-0.0135672	-0.429032	-0.45694	-0.153848	-0.29144	atl	Bifunctional autolysin	no	amidase activity [GO:0004040]; mannosyl-glycoprotein endo-beta-N-acetylglucosaminidase activity [GO:0033925]; N-acetylmuramoyl-L-alanine amidase activity [GO:0008745]	Enzyme		secreted
Q2FZL3	Q2FZL3_C243	EQQFDNSWUAGFSMAALLNATK	0.0339088	0.312746	0.326997	0.443878	0.319872	sspB	Staphopain B	no	cysteine-type peptidase activity [GO:0008234]	Enzyme		secreted	Active site						Functional site
Q2FZL5	Q2FZL5_C129	GYAVGGGNVLNVVUDLTIAADNAIFGQTGPK	-0.282351	-0.111726	-0.305574	-0.046936	-0.197039	menB	1,4-dihydroxy-2-naphthoyl-CoA synthase	no	1,4-dihydroxy-2-naphthoyl-CoA synthase activity [GO:0008935]; isomerase activity [GO:0016853]	Enzyme
Q2FZL5	Q2FZL5_C175	EIWYLUR	0.033351	-0.256513	-0.476182	-0.111119	-0.183816	menB	1,4-dihydroxy-2-naphthoyl-CoA synthase	no	1,4-dihydroxy-2-naphthoyl-CoA synthase activity [GO:0008935]; isomerase activity [GO:0016853]	Enzyme
Q2FZL5	Q2FZL5_C206	VEDETVQWUK	-0.183514	-0.133479	-0.0907108	-0.21638	-0.158497	menB	1,4-dihydroxy-2-naphthoyl-CoA synthase	no	1,4-dihydroxy-2-naphthoyl-CoA synthase activity [GO:0008935]; isomerase activity [GO:0016853]	Enzyme
Q2FZL5	Q2FZL5_C72	DDQNVSVIVLTGEGDLAFUSGGDQK	-0.341057	-0.0663855	-0.101552	0.0382957	-0.0839686	menB	1,4-dihydroxy-2-naphthoyl-CoA synthase	no	1,4-dihydroxy-2-naphthoyl-CoA synthase activity [GO:0008935]; isomerase activity [GO:0016853]	Enzyme
Q2FZL7	Q2FZL7_C261	KFDHPNVIUTYDLLFR	-0.23221	-0.0976562	0.0795658	0.0996319	-0.0090452	menD	2-succinyl-5-enolpyruvyl-6-hydroxy-3-cyclohexene-1-carboxylate synthase	no	2-succinyl-5-enolpyruvyl-6-hydroxy-3-cyclohexene-1-carboxylic-acid synthase activity [GO:0070204]; metal ion binding [GO:0046872]; thiamine pyrophosphate binding [GO:0030976]	Enzyme
Q2FZL7	Q2FZL7_C78	GSERPVAILUTSGTAAANYTPAIAESQISR	-0.534496	0.0993625	0.0953168		0.0953168	menD	2-succinyl-5-enolpyruvyl-6-hydroxy-3-cyclohexene-1-carboxylate synthase	no	2-succinyl-5-enolpyruvyl-6-hydroxy-3-cyclohexene-1-carboxylic-acid synthase activity [GO:0070204]; metal ion binding [GO:0046872]; thiamine pyrophosphate binding [GO:0030976]	Enzyme
Q2FZL8	Q2FZL8_C347	GLYGAPVGYIDIYDDUEFIVAIR	0.410233	-0.418099			-0.00393336	SAOUHSC_00982	Uncharacterized protein	no	isochorismate synthase activity [GO:0008909]	Enzyme
Q2FZL8	Q2FZL8_C369	AQATLFAGUGIVK	-0.0793561	-0.0900981	0.0790196	0.373398	-0.000168221	SAOUHSC_00982	Uncharacterized protein	no	isochorismate synthase activity [GO:0008909]	Enzyme
Q2FZM1	Q2FZM1_C148	WSLNUDINNEAALK	-0.159202	-0.147442	0.0506062	0.157949	-0.0484178	SAOUHSC_00979	Uncharacterized protein	no	0	not assigned
Q2FZM1	Q2FZM1_C45	SUVDATYR	-0.158526	-0.140142	-0.0802252	-0.0242378	-0.110183	SAOUHSC_00979	Uncharacterized protein	no	0	not assigned
Q2FZM1	Q2FZM1_C69	VAGUIISYSGENELK	-0.0474726	-0.306787	-0.143851	-0.420897	-0.225319	SAOUHSC_00979	Uncharacterized protein	no	0	not assigned
Q2FZM7	Q2FZM7_C164	VUYQVFYDEK	-0.180974	-0.0358827	0.0571854	-0.320482	-0.108428	SAOUHSC_00973	Uncharacterized protein	no	0	not assigned
Q2FZM7	Q2FZM7_C225	DSIMIUDGPGSFPK	-0.100353	-0.0793561	0.118734	-0.0331663	-0.0562612	SAOUHSC_00973	Uncharacterized protein	no	0	not assigned
Q2FZP0	Q2FZP0_C133	EPYFSTPYUIK		-0.0533889	0.182565		0.0645881	SAOUHSC_00960	Uncharacterized protein	no	hydrolase activity [GO:0016787]; nucleotide binding [GO:0000166]	not assigned
Q2FZP0	Q2FZP0_C456	VTMTDYUYR	-0.194295	0.125122	0.120485	0.334454	0.122803	SAOUHSC_00960	Uncharacterized protein	no	hydrolase activity [GO:0016787]; nucleotide binding [GO:0000166]	not assigned
Q2FZP0	Q2FZP0_C494	ISUSDNFIVK	-0.0745778	-0.0196383	0.0197731	0.00733905	-0.00614962	SAOUHSC_00960	Uncharacterized protein	no	hydrolase activity [GO:0016787]; nucleotide binding [GO:0000166]	not assigned
Q2FZP4	Q2FZP4_C112	TLMAVDSAVMVIDUAK	0.121679	0.340733	0.0106366	-0.776726	0.0661576	prfC	Peptide chain release factor 3	no	GTPase activity [GO:0003924]; GTP binding [GO:0005525]; translation release factor activity, codon nonspecific [GO:0016150]	Gene expression and Nucleic acid binding
Q2FZP6	Q2FZP6_C53	FUQNVADQGCK	-0.589138	-0.352197			-0.470668	murE	UDP-N-acetylmuramoyl-L-alanyl-D-glutamate--L-lysine ligase	yes	ATP binding [GO:0005524]; UDP-N-acetylmuramoyl-L-alanyl-D-glutamate-L-lysine ligase activity [GO:0047482]	Enzyme
Q2FZQ4	Q2FZQ4_C470	LGLFDRDIVVUATNDDDINR	-0.429984	-0.0823315	-0.0166725	-0.18218	-0.132256	SAOUHSC_00946	Uncharacterized protein	no	solute:proton antiporter activity [GO:0015299]	Receptor/Transporter/Channel	membrane/cell wall
Q2FZQ7	Q2FZQ7_C35	QFVDVQNDYDUYFCIVDQHAITMPQDR	-0.430956	-0.73159	-0.403275	-0.337904	-0.417115	trpS	Tryptophan--tRNA ligase	yes	ATP binding [GO:0005524]; tryptophan-tRNA ligase activity [GO:0004830]	Gene expression and Nucleic acid binding
Q2FZQ7	Q2FZQ7_C38	QFVDVQNDYDCYFUIVDQHAITMPQDR		-0.935448		-0.619071	-0.77726	trpS	Tryptophan--tRNA ligase	yes	ATP binding [GO:0005524]; tryptophan-tRNA ligase activity [GO:0004830]	Gene expression and Nucleic acid binding
Q2FZR4	Q2FZR4_C49	GETLGLVGESGUGK	-0.244383	-0.163504	-0.181735	-0.115033	-0.172619	SAOUHSC_00926	Oligopeptide ABC transporter, ATP-binding protein, putative	no	ATPase activity [GO:0016887]; ATP binding [GO:0005524]	not assigned						Nucleotide binding			Functional site
Q2FZR5	Q2FZR5_C173	IVIATALAUEPK	-0.241083	-0.0215408	-0.178094	-0.134303	-0.156198	SAOUHSC_00925	Uncharacterized protein	no	ATPase activity [GO:0016887]; ATP binding [GO:0005524]	not assigned
Q2FZR9	Q2FZR9_C165	GPNGATVTAUATGTNSIGEAFK	1.34335	1.4328	2.28134	2.24653	1.83966	SAOUHSC_00921	3-oxoacyl-[acyl-carrier-protein] synthase 2	yes	beta-ketoacyl-acyl-carrier-protein synthase II activity [GO:0033817]	Enzyme			Active site						Functional site
Q2FZR9	Q2FZR9_C220	ALSTNDDIETAURPFQEGR	-0.159412	0.164529	-0.0749576	0.0962619	0.0106521	SAOUHSC_00921	3-oxoacyl-[acyl-carrier-protein] synthase 2	yes	beta-ketoacyl-acyl-carrier-protein synthase II activity [GO:0033817]	Enzyme
Q2FZS0	Q2FZS0_C112	VASMDQLAAUSGFMYSMITAK	-0.42026	-0.0316069	-0.266871	-0.203253	-0.235062	fabH	3-oxoacyl-[acyl-carrier-protein] synthase 3	yes	3-oxoacyl-[acyl-carrier-protein] synthase activity [GO:0004315]; beta-ketoacyl-acyl-carrier-protein synthase III activity [GO:0033818]	Enzyme			Active site						Functional site
Q2FZS7	Q2FZS7_C160	EVHSEKVUEGK	0.218943	0.415672	-0.0490539	0.562279	0.317307	SAOUHSC_00913	Uncharacterized protein	no	DNA binding [GO:0003677]; DNA binding transcription factor activity [GO:0003700]	Gene expression and Nucleic acid binding
Q2FZS8	Q2FZS8_C309	GELHUIGATTLNEYR	-0.138839	-0.200399	-0.20515	-0.239498	-0.202775	clpB	Chaperone protein ClpB	no	ATP binding [GO:0005524]; peptidase activity [GO:0008233]	Enzyme
Q2FZS8	Q2FZS8_C397	AIDLVDQAUATIR	-0.588491	-0.497879	-0.466421	-0.576684	-0.537281	clpB	Chaperone protein ClpB	no	ATP binding [GO:0005524]; peptidase activity [GO:0008233]	Enzyme
Q2FZT0	Q2FZT0_C28	VNVDDEGVUTVDMTLTSMGCPMGPQIIDQVK	0.337083	0.0575542	0.204516	0.131326	0.167921	SAOUHSC_00910	Uncharacterized protein	no	0	not assigned
Q2FZT0	Q2FZT0_C39	VNVDDEGVCTVDMTLTSMGUPMGPQIIDQVK						SAOUHSC_00910	Uncharacterized protein	no	0	not assigned
Q2FZT1	Q2FZT1_C7	MQPHLIULDLDGTLLNDNK	-0.0694935	0.0682082	-0.123207	0.428142	-0.000642648	SAOUHSC_00909	Uncharacterized protein	no	hydrolase activity [GO:0016787]	not assigned
Q2FZT1	Q2FZT1_C82	TUHEILDLGIAQNIIQGLQQYQVSNIIAEVK	-0.447052	0.0718999	-0.0544073	0.175812	0.00874633	SAOUHSC_00909	Uncharacterized protein	no	hydrolase activity [GO:0016787]	not assigned
Q2FZT4	Q2FZT4_C200	SLTGGUPMGPYIVTK	0.0706696	0.105121	0.333491	0.1375	0.121311	SAOUHSC_00906	Uncharacterized protein SAOUHSC_00906	no	catalytic activity [GO:0003824]; metal ion binding [GO:0046872]	Enzyme
Q2FZT5	Q2FZT5_C112	IHQAQISTLHSFULK	-0.236741	0.178109	0.910733		0.178109	addA	ATP-dependent helicase/nuclease subunit A	no	ATP binding [GO:0005524]; ATP-dependent DNA helicase activity [GO:0004003]; DNA binding [GO:0003677]; exonuclease activity [GO:0004527]	Gene expression and Nucleic acid binding
Q2FZT6	Q2FZT6_C1112	QKLPUAFCSYQSVCHVDGMIDSK	0.0764918	0.261951			0.169221	addB	ATP-dependent helicase/deoxyribonuclease subunit B	no	4 iron, 4 sulfur cluster binding [GO:0051539]; ATP binding [GO:0005524]; ATP-dependent DNA helicase activity [GO:0004003]; DNA binding [GO:0003677]; exonuclease activity [GO:0004527]; metal ion binding [GO:0046872]	Gene expression and Nucleic acid binding								Metall binding	Functional site
Q2FZT6	Q2FZT6_C296	VAUQGHINILESATMR	-0.0904329	-0.239782	-0.21188		-0.21188	addB	ATP-dependent helicase/deoxyribonuclease subunit B	no	4 iron, 4 sulfur cluster binding [GO:0051539]; ATP binding [GO:0005524]; ATP-dependent DNA helicase activity [GO:0004003]; DNA binding [GO:0003677]; exonuclease activity [GO:0004527]; metal ion binding [GO:0046872]	Gene expression and Nucleic acid binding
Q2FZT6	Q2FZT6_C784	FEGYQQUPFK	0.367169	0.178316	0.867106	0.508975	0.438072	addB	ATP-dependent helicase/deoxyribonuclease subunit B	no	4 iron, 4 sulfur cluster binding [GO:0051539]; ATP binding [GO:0005524]; ATP-dependent DNA helicase activity [GO:0004003]; DNA binding [GO:0003677]; exonuclease activity [GO:0004527]; metal ion binding [GO:0046872]	Gene expression and Nucleic acid binding								Metall binding	Functional site
Q2FZU1	Q2FZU1_C116	TNSVGIAHGUTGK	-0.171748	-0.0998377	-0.00196814	0.0638991	-0.0509029	argG	Argininosuccinate synthase	no	argininosuccinate synthase activity [GO:0004055]; ATP binding [GO:0005524]	Enzyme				Binding site					Functional site
Q2FZU1	Q2FZU1_C32	GYDVVAUCLDVGEGK	0.172999	-0.519608	0.0495172	0.0350608	0.042289	argG	Argininosuccinate synthase	no	argininosuccinate synthase activity [GO:0004055]; ATP binding [GO:0005524]	Enzyme
Q2FZU1	Q2FZU1_C57	ALDMGAVEUHIIDATK	-0.361497	-0.138026	0.298002	0.435309	0.0799881	argG	Argininosuccinate synthase	no	argininosuccinate synthase activity [GO:0004055]; ATP binding [GO:0005524]	Enzyme
Q2FZU5	Q2FZU5_C111	GGIVUDPR	-0.201825	-0.16427	-0.0973012	-0.0317839	-0.130786	SAOUHSC_00895	Glutamate dehydrogenase	no	oxidoreductase activity, acting on the CH-NH2 group of donors, NAD or NADP as acceptor [GO:0016639]	Enzyme
Q2FZU5	Q2FZU5_C286	ELFELDUDILVPAAISNQITEDNAHDIK	-0.239226	-0.234975	-0.100592	0.00100953	-0.167783	SAOUHSC_00895	Glutamate dehydrogenase	no	oxidoreductase activity, acting on the CH-NH2 group of donors, NAD or NADP as acceptor [GO:0016639]	Enzyme
Q2FZU6	Q2FZU6_C216	ELUDEHNVLFIADEIQAGLGR	0.171265	0.368371	-0.274467	-0.0847905	0.0432374	rocD	Ornithine aminotransferase	no	identical protein binding [GO:0042802]; ornithine-oxo-acid transaminase activity [GO:0004587]; pyridoxal phosphate binding [GO:0030170]	Enzyme
Q2FZU6	Q2FZU6_C353	PYUEALKEEGLLCK	0.313977	0.46565	0.34415	0.428959	0.386554	rocD	Ornithine aminotransferase	no	identical protein binding [GO:0042802]; ornithine-oxo-acid transaminase activity [GO:0004587]; pyridoxal phosphate binding [GO:0030170]	Enzyme
Q2FZU6	Q2FZU6_C363	EEGLLUK	0.53977	0.533117	0.652638	0.637842	0.588806	rocD	Ornithine aminotransferase	no	identical protein binding [GO:0042802]; ornithine-oxo-acid transaminase activity [GO:0004587]; pyridoxal phosphate binding [GO:0030170]	Enzyme
Q2FZU6	Q2FZU6_C92	AFHSDNLGEWYEKIUK						rocD	Ornithine aminotransferase	no	identical protein binding [GO:0042802]; ornithine-oxo-acid transaminase activity [GO:0004587]; pyridoxal phosphate binding [GO:0030170]	Enzyme
Q2FZV4	Q2FZV4_C50	QPFGYLHGGASIALGETAUSLGSANLIDTTK	-0.0391716	-0.070782	-0.155154	0.0554025	-0.0549768	SAOUHSC_00881	Uncharacterized protein	yes	0	not assigned
Q2FZV6	Q2FZV6_C127	YDQLSDVLMAUGIQSER	0.128425	0.37629	-0.14409	-0.123104	0.00266072	SAOUHSC_00879	Probable cytosol aminopeptidase	no	aminopeptidase activity [GO:0004177]; manganese ion binding [GO:0030145]; metalloexopeptidase activity [GO:0008235]	Enzyme
Q2FZV6	Q2FZV6_C284	FDMUGAANVVGIIEAASR	0.458195	0.233397	0.331694	0.558799	0.394944	SAOUHSC_00879	Probable cytosol aminopeptidase	no	aminopeptidase activity [GO:0004177]; manganese ion binding [GO:0030145]; metalloexopeptidase activity [GO:0008235]	Enzyme
Q2FZV7	Q2FZV7_C185	IPELUSK	-0.019833	0.0167626	-0.697093	-0.00313339	-0.0114832	SAOUHSC_00878	NADH dehydrogenase-like protein SAOUHSC_00878	no	NAD(P)H dehydrogenase (quinone) activity [GO:0003955]	Enzyme
Q2FZV7	Q2FZV7_C199	ITUVEAAPK	0.0936147	0.169815	-0.151071	0.00404985	0.0488323	SAOUHSC_00878	NADH dehydrogenase-like protein SAOUHSC_00878	no	NAD(P)H dehydrogenase (quinone) activity [GO:0003955]	Enzyme
Q2FZV7	Q2FZV7_C238	IATPIVAUNEK	0.0703893	-0.119714	-0.0758849	0.114367	-0.00274779	SAOUHSC_00878	NADH dehydrogenase-like protein SAOUHSC_00878	no	NAD(P)H dehydrogenase (quinone) activity [GO:0003955]	Enzyme
Q2FZV7	Q2FZV7_C354	GTVUSLGSHDGVGMVFGK	0.298072	-0.0764781	-0.0625953	0.135009	0.0362071	SAOUHSC_00878	NADH dehydrogenase-like protein SAOUHSC_00878	no	NAD(P)H dehydrogenase (quinone) activity [GO:0003955]	Enzyme
Q2FZV8	Q2FZV8_C101	QSLMGGGFQIDNPNAIASUGCGSSFR	0.236829	0.596458	0.940806	0.669843	0.633151	SAOUHSC_00877	Uncharacterized protein	no	iron-sulfur cluster binding [GO:0051536]; structural molecule activity [GO:0005198]	Modulator/Scaffolding/Adaptor
Q2FZV8	Q2FZV8_C103	QSLMGGGFQIDNPNAIASCGUGSSFR	0.259423	0.237197	0.915712		0.259423	SAOUHSC_00877	Uncharacterized protein	no	iron-sulfur cluster binding [GO:0051536]; structural molecule activity [GO:0005198]	Modulator/Scaffolding/Adaptor
Q2FZV8	Q2FZV8_C119	VAGNPENU	-0.475014	-0.212267			-0.34364	SAOUHSC_00877	Uncharacterized protein	no	iron-sulfur cluster binding [GO:0051536]; structural molecule activity [GO:0005198]	Modulator/Scaffolding/Adaptor
Q2FZV8	Q2FZV8_C37	VNGGGUTGLTYGMGAEEAPGENDEVLEYFGLK	0.0308304	0.379288		0.265677	0.265677	SAOUHSC_00877	Uncharacterized protein	no	iron-sulfur cluster binding [GO:0051536]; structural molecule activity [GO:0005198]	Modulator/Scaffolding/Adaptor
Q2FZW0	Q2FZW0_C104	IDYDELIIGLGUEDK	-0.242366	-0.0283042	0.162983	0.119688	0.045692	SAOUHSC_00875	Uncharacterized protein	no	oxidoreductase activity [GO:0016491]	Enzyme
Q2FZW0	Q2FZW0_C217	IYNUDEPK	-0.16767	0.123395	0.243424	0.114785	0.11909	SAOUHSC_00875	Uncharacterized protein	no	oxidoreductase activity [GO:0016491]	Enzyme
Q2FZW0	Q2FZW0_C271	NVYVVGDUADLPHAPSAQLAEVQGDQIADVLK	-0.0519207	-0.0630888	0.119693	0.115166	0.0316229	SAOUHSC_00875	Uncharacterized protein	no	oxidoreductase activity [GO:0016491]	Enzyme
Q2FZW1	Q2FZW1_C15	MEHVSVVVYGADVIUASCVNAPTSK	-0.187724	-0.199438	0.0240359	-0.10324	-0.145482	SAOUHSC_00874	Uncharacterized protein	no	0	not assigned
Q2FZW1	Q2FZW1_C18	MEHVSVVVYGADVICASUVNAPTSK	-0.0189657	-0.418253	-0.0327576		-0.0327576	SAOUHSC_00874	Uncharacterized protein	no	0	not assigned
Q2FZW2	Q2FZW2_C30	DGGDUSLIDVEDGIVK	0.488823	0.868766	1.05665	0.941407	0.905086	SAOUHSC_00873	Uncharacterized protein	no	iron ion binding [GO:0005506]; iron-sulfur cluster binding [GO:0051536]	not assigned
Q2FZW2	Q2FZW2_C48	LQLHGAUGTCPSSTITLK	0.912343	1.25592	1.66289	1.26987	1.2629	SAOUHSC_00873	Uncharacterized protein	no	iron ion binding [GO:0005506]; iron-sulfur cluster binding [GO:0051536]	not assigned
Q2FZW2	Q2FZW2_C51	LQLHGACGTUPSSTITLK	0.872159	1.2725	1.62919	1.32112	1.29681	SAOUHSC_00873	Uncharacterized protein	no	iron ion binding [GO:0005506]; iron-sulfur cluster binding [GO:0051536]	not assigned
Q2FZW6	Q2FZW6_C73	AGUGYVPVDTSIPEDR	-0.194047	-0.147042	-0.128771	0.0223323	-0.137907	dltA	D-alanine--D-alanyl carrier protein ligase	yes	ATP binding [GO:0005524]; D-alanine [D-alanyl carrier protein] ligase activity [GO:0047473]	Enzyme
Q2FZW9	Q2FZW9_C181	HKDAEADFNATYVSFETLLAESDFIIUTAPLTK	0.0962619	0.246347	-0.28086		0.0962619	SAOUHSC_00866	D-isomer specific 2-hydroxyacid dehydrogenase, NAD binding domain protein	no	glyoxylate reductase (NADP) activity [GO:0030267]; hydroxypyruvate reductase activity [GO:0016618]; NAD binding [GO:0051287]	Enzyme
Q2FZW9	Q2FZW9_C233	EILAUGLDVLANEPIDHTHPLMGR	-0.156032	0.0970714	0.0635029	0.242572	0.0802872	SAOUHSC_00866	D-isomer specific 2-hydroxyacid dehydrogenase, NAD binding domain protein	no	glyoxylate reductase (NADP) activity [GO:0030267]; hydroxypyruvate reductase activity [GO:0016618]; NAD binding [GO:0051287]	Enzyme
Q2FZW9	Q2FZW9_C24	DADAUFITLSEQIDAEILAQSPNLK	-0.291692	0.0762769	0.169924	0.0714881	0.0738825	SAOUHSC_00866	D-isomer specific 2-hydroxyacid dehydrogenase, NAD binding domain protein	no	glyoxylate reductase (NADP) activity [GO:0030267]; hydroxypyruvate reductase activity [GO:0016618]; NAD binding [GO:0051287]	Enzyme
Q2FZX3	Q2FZX3_C18	VDQHYFELIENYREUFNEEQFIAR	-0.313244	-0.311184	0.215244		-0.311184	SAOUHSC_00862	Uncharacterized protein	no	0	not assigned
Q2FZX4	Q2FZX4_C272	HUQAGPLVR	0.176523	0.182742	0.447702	0.50359	0.315222	lipA	Lipoyl synthase	no	4 iron, 4 sulfur cluster binding [GO:0051539]; lipoate synthase activity [GO:0016992]; metal ion binding [GO:0046872]	Enzyme
Q2FZX4	Q2FZX4_C41	EKNLNTVUEEAK	0.17342	0.415862	1.07334	1.6612	0.744601	lipA	Lipoyl synthase	no	4 iron, 4 sulfur cluster binding [GO:0051539]; lipoate synthase activity [GO:0016992]; metal ion binding [GO:0046872]	Enzyme								Metall binding	Functional site
Q2FZX4	Q2FZX4_C52	CPNIHEUWGAR	0.37829	0.61306		1.33027	0.61306	lipA	Lipoyl synthase	no	4 iron, 4 sulfur cluster binding [GO:0051539]; lipoate synthase activity [GO:0016992]; metal ion binding [GO:0046872]	Enzyme								Metall binding	Functional site
Q2FZX4	Q2FZX4_C68	TATFMILGAVUTR	1.08706	1.14757		1.30319	1.14757	lipA	Lipoyl synthase	no	4 iron, 4 sulfur cluster binding [GO:0051539]; lipoate synthase activity [GO:0016992]; metal ion binding [GO:0046872]	Enzyme								Metall binding	Functional site
Q2FZX5	Q2FZX5_C100	FIVTUSNVIDESGHLPNNIVSSYIK	-0.33929	-0.384584	-0.39051	0.0728604	-0.361937	SAOUHSC_00860	5-nucleotidase family protein	no	hydrolase activity [GO:0016787]; nucleotide binding [GO:0000166]	not assigned
Q2FZX5	Q2FZX5_C292	SMNHITEAAYLLAQSVUEYTHAQCAIINAGLLVK	0.473735	0.249991			0.361863	SAOUHSC_00860	5-nucleotidase family protein	no	hydrolase activity [GO:0016787]; nucleotide binding [GO:0000166]	not assigned
Q2FZX7	Q2FZX7_C139	QQLQAFPMUVEFR	-0.131187	-0.315702			-0.223444	SAOUHSC_00858	Uncharacterized protein	no	0	not assigned
Q2FZX9	Q2FZX9_C129	QVPVUCFTFGIPSEQIISR	0.0439044	0.0353424	0.418244	0.19862	0.121262	SAOUHSC_00855	Probable nitronate monooxygenase	no	nitronate monooxygenase activity [GO:0018580]	Enzyme
Q2FZX9	Q2FZX9_C130	KQVPVCUFTFGIPSEQIISR	0.786011	0.949572			0.867792	SAOUHSC_00855	Probable nitronate monooxygenase	no	nitronate monooxygenase activity [GO:0018580]	Enzyme
Q2FZY3	Q2FZY3_C302	YPNUVLLGEGAK	-0.185543	-0.155036	-0.171663	-0.0323339	-0.16335	SAOUHSC_00851	UPF0051 protein SAOUHSC_00851	yes	0	not assigned
Q2FZY4	Q2FZY4_C128	IKUATLAWK	-0.0163953	0.156785	-0.191969	0.209017	0.0701948	SAOUHSC_00850	Uncharacterized protein	yes	2 iron, 2 sulfur cluster binding [GO:0051537]; 4 iron, 4 sulfur cluster binding [GO:0051539]; ferrous iron binding [GO:0008198]; iron-sulfur transferase activity [GO:0036455]	Enzyme
Q2FZY4	Q2FZY4_C41	NKGVLDNGSMTVDMNNPTUGDR	-0.520769	-0.985273	-0.301053	-0.00595618	-0.410911	SAOUHSC_00850	Uncharacterized protein	yes	2 iron, 2 sulfur cluster binding [GO:0051537]; 4 iron, 4 sulfur cluster binding [GO:0051539]; ferrous iron binding [GO:0008198]; iron-sulfur transferase activity [GO:0036455]	Enzyme
Q2FZY4	Q2FZY4_C66	FEGEGUSISMASASMMTQAVK	-0.148737	-0.182901	0.0436245		-0.148737	SAOUHSC_00850	Uncharacterized protein	yes	2 iron, 2 sulfur cluster binding [GO:0051537]; 4 iron, 4 sulfur cluster binding [GO:0051539]; ferrous iron binding [GO:0008198]; iron-sulfur transferase activity [GO:0036455]	Enzyme
Q2FZY5	Q2FZY5_C371	AGHHUAQPLMK	0.128425	-0.351958	-0.405241	-0.0600513	-0.206005	SAOUHSC_00849	Cysteine desulfurase	yes	cysteine desulfurase activity [GO:0031071]; pyridoxal phosphate binding [GO:0030170]; transaminase activity [GO:0008483]	Enzyme
Q2FZZ3	Q2FZZ3_C28	DVTTFYEEDKHLIFGYTPTUGTCK		0.151846	0.59582	0.473839	0.473839	SAOUHSC_00841	Uncharacterized protein	no	oxidoreductase activity, acting on a sulfur group of donors, disulfide as acceptor [GO:0016671]; protein disulfide oxidoreductase activity [GO:0015035]; protein-disulfide reductase activity [GO:0047134]; thioredoxin-disulfide reductase activity [GO:0004791]	Enzyme
Q2FZZ3	Q2FZZ3_C61	IDLNFYPQFUK	-0.199173	0.078883	0.105142	0.0561673	0.0675252	SAOUHSC_00841	Uncharacterized protein	no	oxidoreductase activity, acting on a sulfur group of donors, disulfide as acceptor [GO:0016671]; protein disulfide oxidoreductase activity [GO:0015035]; protein-disulfide reductase activity [GO:0047134]; thioredoxin-disulfide reductase activity [GO:0004791]	Enzyme
Q2FZZ6	Q2FZZ6_C173	QTITUTDYK	-0.186278	-0.150625	-0.0478901	-0.0750336	-0.112829	SAOUHSC_00838	Uncharacterized protein	no	0	not assigned
Q2FZZ6	Q2FZZ6_C210	SMFGGYDELMEPVUNTFTAK	-0.0223024	-0.197914	-0.2122	-0.14618	-0.172047	SAOUHSC_00838	Uncharacterized protein	no	0	not assigned
Q2FZZ6	Q2FZZ6_C291	FDDYMYSWDUS	-0.264756	0.180215	-0.0894669	-0.13508	-0.112274	SAOUHSC_00838	Uncharacterized protein	no	0	not assigned
Q2FZZ9	Q2FZZ9_C10	NUTTCKK	0.191057	-0.431196	-0.219914	-0.257631	-0.238773	SAOUHSC_00835	Uncharacterized protein	no	0	not assigned
Q2FZZ9	Q2FZZ9_C13	NCTTUKK	-0.514944	-0.92262	-0.700966	-0.819979	-0.760473	SAOUHSC_00835	Uncharacterized protein	no	0	not assigned
Q2G000	Q2G000_C29	FEAGWUPDCR	0.0594935	-0.671363	-0.629923	0.161837	-0.285215	SAOUHSC_00834	Thioredoxin, putative	no	oxidoreductase activity, acting on a sulfur group of donors, disulfide as acceptor [GO:0016671]; protein disulfide oxidoreductase activity [GO:0015035]; protein-disulfide reductase activity [GO:0047134]; thioredoxin-disulfide reductase activity [GO:0004791]	Enzyme
Q2G000	Q2G000_C32	FEAGWCPDUR	-0.820989	-0.0806391	0.0469799	-0.408781	-0.24471	SAOUHSC_00834	Thioredoxin, putative	no	oxidoreductase activity, acting on a sulfur group of donors, disulfide as acceptor [GO:0016671]; protein disulfide oxidoreductase activity [GO:0015035]; protein-disulfide reductase activity [GO:0047134]; thioredoxin-disulfide reductase activity [GO:0004791]	Enzyme
Q2G001	Q2G001_C77	QQUHYDAVTK	-0.242823	-0.0384211	0.000432744	0.166073	-0.0189942	SAOUHSC_00833	Uncharacterized protein	no	oxidoreductase activity [GO:0016491]	Enzyme
Q2G002	Q2G002_C187	NDVLNLLQAMSTFSDTMDUK	-0.4993	0.060842	0.0200577	-0.0576998	-0.018821	aroD	3-dehydroquinate dehydratase	no	3-dehydroquinate dehydratase activity [GO:0003855]	Enzyme
Q2G002	Q2G002_C216	TAQGVFGGALTYGUIGVPQAPGQIDVTDLK	0.00633393	0.14104	0.0920721		0.0920721	aroD	3-dehydroquinate dehydratase	no	3-dehydroquinate dehydratase activity [GO:0003855]	Enzyme
Q2G012	Q2G012_C232	INHFUVVPQINSFK	-0.0228593	0.270708	-0.273552		-0.0228593	emp	Extracellular matrix protein-binding protein emp	no	0	not assigned	membrane/cell wall
Q2G023	Q2G023_C118	LYLKHGHUK			-0.0552615	-0.0856651	-0.0704633	smpB	SsrA-binding protein	yes	RNA binding [GO:0003723]	Gene expression and Nucleic acid binding
Q2G024	Q2G024_C333	LSNGIUSLNPNVDR	-0.26609	-0.0537782	0.0226164	0.0243197	-0.0155809	rnr	Ribonuclease R	yes	exoribonuclease II activity [GO:0008859]; RNA binding [GO:0003723]	Gene expression and Nucleic acid binding
Q2G025	Q2G025_C115	GIVTMUAPMGGK	0.179893	0.367707	-0.0478603	0.28155	0.230722	SAOUHSC_00802	Carboxylesterase, putative	no	carboxylic ester hydrolase activity [GO:0052689]; lipase activity [GO:0016298]	Enzyme	membrane/cell wall
Q2G030	Q2G030_C128	HGMTPIIUVGETDEER						tpiA	Triosephosphate isomerase	yes	triose-phosphate isomerase activity [GO:0004807]	Enzyme
Q2G030	Q2G030_C189	SSTSEDANEMUAFVR	-0.307234	0.115965	-0.236045	-0.315594	-0.271639	tpiA	Triosephosphate isomerase	yes	triose-phosphate isomerase activity [GO:0004807]	Enzyme
Q2G030	Q2G030_C40	EVESVIUAPAIQLDALTTAVK	-0.401635	0.0695647	-0.386544	-0.34639	-0.366467	tpiA	Triosephosphate isomerase	yes	triose-phosphate isomerase activity [GO:0004807]	Enzyme
Q2G031	Q2G031_C337	LFADELEGAHTVVWNGPMGVFEFSNFAQGTIGVUK						pgk	Phosphoglycerate kinase	yes	ATP binding [GO:0005524]; phosphoglycerate kinase activity [GO:0004618]	Enzyme
Q2G032	Q2G032_C151	TIVFNTNHQELDGSETVVSGASUTTNSLAPVAK	-0.806645	1.77231		0.715278	0.715278	SAOUHSC_00795	Glyceraldehyde-3-phosphate dehydrogenase	yes	NAD binding [GO:0051287]; NADP binding [GO:0050661]; oxidoreductase activity, acting on the aldehyde or oxo group of donors, NAD or NADP as acceptor [GO:0016620]	Enzyme			Active site						Functional site
Q2G032	Q2G032_C96	DLNIDVVLEUTGFYTDKDK	-1.91874	0.0340444	-2.13131	-0.87954	-1.39914	SAOUHSC_00795	Glyceraldehyde-3-phosphate dehydrogenase	yes	NAD binding [GO:0051287]; NADP binding [GO:0050661]; oxidoreductase activity, acting on the aldehyde or oxo group of donors, NAD or NADP as acceptor [GO:0016620]	Enzyme
Q2G037	Q2G037_C225	LVNUETANLNK	-0.114582	0.0360461	0.117163	0.141564	0.0766046	whiA	Putative sporulation transcription regulator WhiA	no	DNA binding [GO:0003677]	Gene expression and Nucleic acid binding
Q2G037	Q2G037_C87	NNIYIUR	-0.0855712	-0.211322	-0.136421	-0.488593	-0.173872	whiA	Putative sporulation transcription regulator WhiA	no	DNA binding [GO:0003677]	Gene expression and Nucleic acid binding
Q2G038	Q2G038_C250	QAGQPFIDYVIUSTQTFNAQVLK	-0.323245	-0.295376	-0.262677		-0.295376	SAOUHSC_00788	Gluconeogenesis factor	yes	0	not assigned
Q2G039	Q2G039_C262	SQLVIAIGUTGGQHR	-0.247286	-0.127557	-0.00521755	-0.0439285	-0.0857429	SAOUHSC_00787	Nucleotide-binding protein SAOUHSC_00787	no	ATP binding [GO:0005524]; GTP binding [GO:0005525]	not assigned
Q2G039	Q2G039_C38	SLVIQCLEDMGYFUVDNLPPVLLPK	-0.15859	-0.0829579	-0.0613604	-0.0588937	-0.0721591	SAOUHSC_00787	Nucleotide-binding protein SAOUHSC_00787	no	ATP binding [GO:0005524]; GTP binding [GO:0005525]	not assigned
Q2G041	Q2G041_C134	GVSYUAVCDGAFFK	-0.199786	-0.636616	-0.058503	-0.264755	-0.23227	SAOUHSC_00785	Thioredoxin reductase	yes	thioredoxin-disulfide reductase activity [GO:0004791]	Enzyme
Q2G041	Q2G041_C137	GVSYCAVUDGAFFK						SAOUHSC_00785	Thioredoxin reductase	yes	thioredoxin-disulfide reductase activity [GO:0004791]	Enzyme
Q2G045	Q2G045_C77	LURPETPAIIVTR	-0.038238	0.217031	0.0587017	0.0358769	0.0472893	hprK	HPr kinase/phosphorylase	yes	ATP binding [GO:0005524]; metal ion binding [GO:0046872]; phosphorelay sensor kinase activity [GO:0000155]; protein serine/threonine kinase activity [GO:0004674]	Enzyme
Q2G046	Q2G046_C252	FSESHAUPICGFSIGELEPR	-0.314679	0.304511			-0.00508386	uvrA	UvrABC system protein A	no	ATPase activity [GO:0016887]; ATP binding [GO:0005524]; DNA binding [GO:0003677]; excinuclease ABC activity [GO:0009381]; zinc ion binding [GO:0008270]	Gene expression and Nucleic acid binding
Q2G046	Q2G046_C255	FSESHACPIUGFSIGELEPR	-1.75945	-1.45621	-1.13527	-0.915664	-1.29574	uvrA	UvrABC system protein A	no	ATPase activity [GO:0016887]; ATP binding [GO:0005524]; DNA binding [GO:0003677]; excinuclease ABC activity [GO:0009381]; zinc ion binding [GO:0008270]	Gene expression and Nucleic acid binding
Q2G046	Q2G046_C276	MFSFNSPFGAUPTCDGLGQK	-0.295943	-0.228081	0.0614306		-0.228081	uvrA	UvrABC system protein A	no	ATPase activity [GO:0016887]; ATP binding [GO:0005524]; DNA binding [GO:0003677]; excinuclease ABC activity [GO:0009381]; zinc ion binding [GO:0008270]	Gene expression and Nucleic acid binding
Q2G046	Q2G046_C279	MFSFNSPFGACPTUDGLGQK	-0.208311	-0.089298	-0.0124026	-0.24127	-0.148804	uvrA	UvrABC system protein A	no	ATPase activity [GO:0016887]; ATP binding [GO:0005524]; DNA binding [GO:0003677]; excinuclease ABC activity [GO:0009381]; zinc ion binding [GO:0008270]	Gene expression and Nucleic acid binding
Q2G046	Q2G046_C406	YMTELPUETCHGK	-0.0213285	-0.277774	0.328776	0.116192	0.0474316	uvrA	UvrABC system protein A	no	ATPase activity [GO:0016887]; ATP binding [GO:0005524]; DNA binding [GO:0003677]; excinuclease ABC activity [GO:0009381]; zinc ion binding [GO:0008270]	Gene expression and Nucleic acid binding
Q2G046	Q2G046_C409	YMTELPCETUHGK	-0.552135	-0.684634	-0.232582	-0.812714	-0.618385	uvrA	UvrABC system protein A	no	ATPase activity [GO:0016887]; ATP binding [GO:0005524]; DNA binding [GO:0003677]; excinuclease ABC activity [GO:0009381]; zinc ion binding [GO:0008270]	Gene expression and Nucleic acid binding
Q2G046	Q2G046_C741	CEAUKGDGIIK	-0.212785	-0.00715907	0.122739	0.138028	0.0577899	uvrA	UvrABC system protein A	no	ATPase activity [GO:0016887]; ATP binding [GO:0005524]; DNA binding [GO:0003677]; excinuclease ABC activity [GO:0009381]; zinc ion binding [GO:0008270]	Gene expression and Nucleic acid binding
Q2G046	Q2G046_C761	IEMHFLPDVYVPUEVCDGKR	-0.395739	0.115566	0.0976108	-0.239839	-0.0711139	uvrA	UvrABC system protein A	no	ATPase activity [GO:0016887]; ATP binding [GO:0005524]; DNA binding [GO:0003677]; excinuclease ABC activity [GO:0009381]; zinc ion binding [GO:0008270]	Gene expression and Nucleic acid binding
Q2G046	Q2G046_C764	IEMHFLPDVYVPCEVUDGKR	-0.268539	-0.259927	0.234501	-0.22048	-0.240204	uvrA	UvrABC system protein A	no	ATPase activity [GO:0016887]; ATP binding [GO:0005524]; DNA binding [GO:0003677]; excinuclease ABC activity [GO:0009381]; zinc ion binding [GO:0008270]	Gene expression and Nucleic acid binding
Q2G050	Q2G050_C213	GDVVEIFPASKEELUIR	-0.416219	-0.104125	-0.0694888	-0.127553	-0.115839	SAOUHSC_00776	Excinuclease ABC, B subunit	no	ATPase activity [GO:0016887]; ATP binding [GO:0005524]; DNA binding [GO:0003677]	Gene expression and Nucleic acid binding
Q2G052	Q2G052_C141	HTSFASUDVIPDFNNDEIEIEINPDDITVDTFR						prfB	Peptide chain release factor 2	yes	translation release factor activity, codon specific [GO:0016149]	Gene expression and Nucleic acid binding
Q2G059	Q2G059_C138	EAVPUIVTLNYDQTGKFEYELASTHFMLR	0.0396999	-0.0145287	0.505078		0.0396999	SAOUHSC_00763	Uncharacterized protein	no	0	not assigned
Q2G059	Q2G059_C54	DATHNUSAYTIGPEMNIQK	-0.257338	-0.0779849	-0.156885	-0.312434	-0.207112	SAOUHSC_00763	Uncharacterized protein	no	0	not assigned
Q2G059	Q2G059_C95	KLDVHNAUVVVTR	-0.345564	-0.193998	-0.274041	-0.0451635	-0.234019	SAOUHSC_00763	Uncharacterized protein	no	0	not assigned
Q2G064	Q2G064_C153	AGIVEIMEAIUYLQEHPEIK	-0.433019	0.127501	-0.046176	0.0434845	-0.00134577	pepT	Peptidase T	no	metallopeptidase activity [GO:0008237]; tripeptide aminopeptidase activity [GO:0045148]; zinc ion binding [GO:0008270]	Enzyme
Q2G065	Q2G065_C307	IAELUHK	-0.345959	-0.223551	0.0138023	-0.299964	-0.261758	SAOUHSC_00756	Uncharacterized protein	no	glycerate kinase activity [GO:0008887]	Enzyme
Q2G065	Q2G065_C318	VAIAIUATAEK	-0.140794	0.312084	-0.307162		-0.140794	SAOUHSC_00756	Uncharacterized protein	no	glycerate kinase activity [GO:0008887]	Enzyme
Q2G066	Q2G066_C30	HSETUPISANAYDQFNK	0.167615	0.405992	0.193456	0.227371	0.210414	SAOUHSC_00755	Uncharacterized protein	no	0	not assigned
Q2G069	Q2G069_C126	DYALTGLEFAUGIPGSIGGAVYMNAGAYGGEVK	-0.174328	0.0996319		-0.123654	-0.123654	murB	UDP-N-acetylenolpyruvoylglucosamine reductase	yes	flavin adenine dinucleotide binding [GO:0050660]; UDP-N-acetylmuramate dehydrogenase activity [GO:0008762]	Enzyme
Q2G069	Q2G069_C224	QPLEYPSUGSVFQRPPGHFAGK	0.093065	0.357366	0.325386	0.450963	0.341376	murB	UDP-N-acetylenolpyruvoylglucosamine reductase	yes	flavin adenine dinucleotide binding [GO:0050660]; UDP-N-acetylmuramate dehydrogenase activity [GO:0008762]	Enzyme			Active site						Functional site
Q2G070	Q2G070_C65	AILUGVCK	-0.0732566	0.124725	0.101247	0.331132	0.112986	SAOUHSC_00751	Uncharacterized protein	no	zinc ion binding [GO:0008270]	not assigned
Q2G070	Q2G070_C68	AILCGVUK	-0.624377	-0.527242			-0.575809	SAOUHSC_00751	Uncharacterized protein	no	zinc ion binding [GO:0008270]	not assigned
Q2G078	Q2G078_C191	RGELVSUFLLEVDDSLNSINFIDSTAK	0.0695647	0.229588	0.238298	0.251325	0.233943	SAOUHSC_00742	Ribonucleoside-diphosphate reductase	yes	ATP binding [GO:0005524]; ribonucleoside-diphosphate reductase activity, thioredoxin disulfide as acceptor [GO:0004748]	Enzyme
Q2G078	Q2G078_C403	MSNLUTEIFQLQETSIINDYGIEDEIKR	0.356031	0.569783	0.421264	0.583423	0.495523	SAOUHSC_00742	Ribonucleoside-diphosphate reductase	yes	ATP binding [GO:0005524]; ribonucleoside-diphosphate reductase activity, thioredoxin disulfide as acceptor [GO:0004748]	Enzyme
Q2G078	Q2G078_C430	DISUNLGSLNIVNVMESGK	0.131589	0.128557	0.077243	0.180021	0.130073	SAOUHSC_00742	Ribonucleoside-diphosphate reductase	yes	ATP binding [GO:0005524]; ribonucleoside-diphosphate reductase activity, thioredoxin disulfide as acceptor [GO:0004748]	Enzyme
Q2G078	Q2G078_C716	LLSVEEUTSCSI	-0.478452	-1.07278	-0.0947878	-0.180989	-0.32972	SAOUHSC_00742	Ribonucleoside-diphosphate reductase	yes	ATP binding [GO:0005524]; ribonucleoside-diphosphate reductase activity, thioredoxin disulfide as acceptor [GO:0004748]	Enzyme
Q2G081	Q2G081_C50	FNUPEFTSLCPITGQPDFATIYISYIPNVK	0.958434	0.328607	1.42492	1.42932	1.19168	queF	NADPH-dependent 7-cyano-7-deazaguanine reductase	no	oxidoreductase activity, acting on other nitrogenous compounds as donors, with NAD or NADP as acceptor [GO:0046857]; preQ1 synthase activity [GO:0033739]	Enzyme
Q2G087	Q2G087_C320	VNELYEALLNVGUITRPFPTGVR	-0.330447	-0.00536235			-0.167905	hisC	Histidinol-phosphate aminotransferase	no	histidinol-phosphate transaminase activity [GO:0004400]; pyridoxal phosphate binding [GO:0030170]	Enzyme
Q2G089	Q2G089_C207	IULLNEGHIEQIDTPEGFK	-0.250013	-0.325413	0.410558	-0.292846	-0.27143	SAOUHSC_00731	ABC transporter domain protein	no	ATPase activity [GO:0016887]; ATP binding [GO:0005524]	not assigned
Q2G089	Q2G089_C246	QFMGSHLEDDAPUVEENAIIR	-0.179417	0.0485152	0.0709388	0.140386	0.059727	SAOUHSC_00731	ABC transporter domain protein	no	ATPase activity [GO:0016887]; ATP binding [GO:0005524]	not assigned
Q2G089	Q2G089_C38	HVAVDNISFNINEGEFFVLIGPSGUGK	-0.257425	0.0603241	0.113834	-0.0796305	-0.00965317	SAOUHSC_00731	ABC transporter domain protein	no	ATPase activity [GO:0016887]; ATP binding [GO:0005524]	not assigned						Nucleotide binding			Functional site
Q2G094	Q2G094_C30	GYEHDGVIPUGALDTLAHEIANR	0.0436245	0.104068	0.28238	0.340847	0.193224	SAOUHSC_00727	Uncharacterized protein	no	0	not assigned
Q2G097	Q2G097_C201	EVADVHLUL		-0.632025	0.559443	-0.367546	-0.367546	SAOUHSC_00724	Chorismate binding enzyme, putative	no	catalytic activity [GO:0003824]	Enzyme
Q2G097	Q2G097_C26	IKUSSER	-0.243711	-0.203469	0.19131	-0.00236796	-0.102918	SAOUHSC_00724	Chorismate binding enzyme, putative	no	catalytic activity [GO:0003824]	Enzyme
Q2G098	Q2G098_C322	GIYUGAIGLLLPTEDDKMIFNIPIR	0.184978	0.310456			0.247717	SAOUHSC_00723	Uncharacterized protein	no	4-amino-4-deoxychorismate synthase activity [GO:0046820]	Enzyme
Q2G099	Q2G099_C193	VGDYUENRI	0.314986	0.468323	0.144569		0.314986	SAOUHSC_00722	Para-aminobenzoate synthase, glutamine amidotransferase, component II, putative	no	anthranilate synthase activity [GO:0004049]; transferase activity [GO:0016740]	Enzyme
Q2G0A0	Q2G0A0_C105	GGUSPVGMK	-0.206013	-0.156418	-0.0934788	-0.0971623	-0.12679	SAOUHSC_00705	Cys-tRNA(Pro)/Cys-tRNA(Cys) deacylase	no	aminoacyl-tRNA editing activity [GO:0002161]; lyase activity [GO:0016829]	Gene expression and Nucleic acid binding
Q2G0A0	Q2G0A0_C122	SUENYSHISVSGGLR	0.171	0.13533	0.153935	0.0658018	0.144632	SAOUHSC_00705	Cys-tRNA(Pro)/Cys-tRNA(Cys) deacylase	no	aminoacyl-tRNA editing activity [GO:0002161]; lyase activity [GO:0016829]	Gene expression and Nucleic acid binding
Q2G0A9	Q2G0A9_C58	GITTMDHADIYGDYQUESLFGNALDLSPELR	-0.00417543	0.0176369	-0.653718	-0.0395328	-0.0218541	SAOUHSC_00696	Uncharacterized protein	no	oxidoreductase activity [GO:0016491]	Enzyme
Q2G0B1	Q2G0B1_C12	EQLUFSLYNAQR	0.786345	1.0664	1.25846	1.19188	1.12914	mgrA	HTH-type transcriptional regulator MgrA	no	DNA binding transcription factor activity [GO:0003700]; transcription regulatory region DNA binding [GO:0044212]	Gene expression and Nucleic acid binding
Q2G0B7	Q2G0B7_C166	ALAPLUDTK	-0.293902	-0.156197	-0.412198	-0.0988724	-0.22505	SAOUHSC_00688	Cytokinin riboside 5'-monophosphate phosphoribohydrolase	no	hydrolase activity [GO:0016787]	not assigned
Q2G0B7	Q2G0B7_C8	IAVYUGASK	-0.259098	-0.164011	-0.0361116	-0.0537932	-0.108902	SAOUHSC_00688	Cytokinin riboside 5'-monophosphate phosphoribohydrolase	no	hydrolase activity [GO:0016787]	not assigned
Q2G0B8	Q2G0B8_C4	MIYUETER	-0.15311	0.0415234	0.0560285		0.0415234	SAOUHSC_00687	Uncharacterized protein	no	0	not assigned
Q2G0C7	Q2G0C7_C170	IMYUFNK	0.752749		0.632082	0.393087	0.632082	SAOUHSC_00678	Uncharacterized protein	no	0	not assigned
Q2G0D1	Q2G0D1_C44	LSLNDLAVLDLTMKHUKDEK						sarX	HTH-type transcriptional regulator SarX	no	DNA binding [GO:0003677]	Gene expression and Nucleic acid binding
Q2G0D5	Q2G0D5_C227	FAUATAMGLGTAIGGWK						SAOUHSC_00670	Uncharacterized protein	no	inorganic phosphate transmembrane transporter activity [GO:0005315]	Receptor/Transporter/Channel	membrane/cell wall
Q2G0D6	Q2G0D6_C152	EFETNUDGILR	-0.0964611	0.0644604	0.0608384	0.299274	0.0626494	SAOUHSC_00669	Uncharacterized protein	no	0	not assigned
Q2G0D6	Q2G0D6_C190	IKDIYESMEEIADKUQIVANNFETIIMK	-0.164076	-0.143548	-0.198477	0.17479	-0.153812	SAOUHSC_00669	Uncharacterized protein	no	0	not assigned
Q2G0E0	Q2G0E0_C63	YDGFYWUR	-0.0671376	0.418892	0.183582	0.217727	0.200654	graR	Response regulator protein GraR	no	DNA binding [GO:0003677]	Gene expression and Nucleic acid binding
Q2G0E1	Q2G0E1_C288	MMIHGFEVDUR	0.0659858	0.00762609	0.00374614		0.00762609	SAOUHSC_00664	Uncharacterized protein	no	catalytic activity [GO:0003824]; coenzyme binding [GO:0050662]	Enzyme
Q2G0G1	Q2G0G1_C145	LDPAAASSITUAGVTTYK	-0.280703	-0.203967	-0.0285248	0.073209	-0.116246	adh	Alcohol dehydrogenase	no	alcohol dehydrogenase (NAD) activity [GO:0004022]; zinc ion binding [GO:0008270]	Enzyme								Metall binding	Functional site
Q2G0G1	Q2G0G1_C34	ALKPGEALVQTEYUGVCHTDLHVK	-0.282123	-0.219085	0.214249	0.0380147	-0.0905353	adh	Alcohol dehydrogenase	no	alcohol dehydrogenase (NAD) activity [GO:0004022]; zinc ion binding [GO:0008270]	Enzyme								Metall binding	Functional site
Q2G0G1	Q2G0G1_C37	ALKPGEALVQTEYCGVUHTDLHVK	-0.349989	-0.119871			-0.23493	adh	Alcohol dehydrogenase	no	alcohol dehydrogenase (NAD) activity [GO:0004022]; zinc ion binding [GO:0008270]	Enzyme								Metall binding	Functional site
Q2G0G1	Q2G0G1_C89	VSIAWMFESUGR	-1.31492	-1.00414	-1.25943	-1.53939	-1.28717	adh	Alcohol dehydrogenase	no	alcohol dehydrogenase (NAD) activity [GO:0004022]; zinc ion binding [GO:0008270]	Enzyme								Metall binding	Functional site
Q2G0G1	Q2G0G1_C95	CEYUTTGR	-0.562794	-0.371273	0.0192037	-0.466237	-0.418755	adh	Alcohol dehydrogenase	no	alcohol dehydrogenase (NAD) activity [GO:0004022]; zinc ion binding [GO:0008270]	Enzyme								Metall binding	Functional site
Q2G0G2	Q2G0G2_C87	AAVEGDEAKEYWLUWVTTER	0.297368	0.0309716	-0.0274397	0.156138	0.0935547	SAOUHSC_00607	Uncharacterized protein	no	0	not assigned
Q2G0G3	Q2G0G3_C250	GGEVLLNNULK	-0.125724	-0.242085	0.0968375	-0.110106	-0.117915	SAOUHSC_00606	Uncharacterized protein	no	dGTPase activity [GO:0008832]	Enzyme
Q2G0G5	Q2G0G5_C123	VILVGGDUPK	0.125387	0.262914	0.155361	0.697863	0.209137	SAOUHSC_00604	Uncharacterized protein	no	oxidoreductase activity [GO:0016491]	Enzyme
Q2G0G6	Q2G0G6_C194	ENEAVLQYUVDHQITFIPYFPLASGILAGK	-0.34964	0.0040339	-0.292246	-0.219724	-0.255985	SAOUHSC_00603	Uncharacterized protein	no	oxidoreductase activity [GO:0016491]	Enzyme
Q2G0I1	Q2G0I1_C78	QAUDNFVSR	-0.855197	-0.623754	-0.94931	-0.218514	-0.739475	SAOUHSC_00584	Uncharacterized protein	no	0	not assigned	membrane/cell wall
Q2G0I3	Q2G0I3_C134	TIKDVIEDIQKEDLUHENI						SAOUHSC_00582	Uncharacterized protein	no	DNA binding [GO:0003677]	Gene expression and Nucleic acid binding
Q2G0I3	Q2G0I3_C25	FNSSSLAELTULNPVQLR	-0.0033654	0.0521376			0.0243861	SAOUHSC_00582	Uncharacterized protein	no	DNA binding [GO:0003677]	Gene expression and Nucleic acid binding
Q2G0I3	Q2G0I3_C91	LFTGDEGSHUQIAR	0.340733	0.44159	0.593019	0.519039	0.480314	SAOUHSC_00582	Uncharacterized protein	no	DNA binding [GO:0003677]	Gene expression and Nucleic acid binding
Q2G0I5	Q2G0I5_C11	MKNTFLICDEUQAVNIR						SAOUHSC_00580	UPF0741 protein SAOUHSC_00580	no	0	not assigned
Q2G0I5	Q2G0I5_C36	KLEKLDPDAEIVIGUQSYCGPGR	0.434348	0.140517	0.385044	0.351854	0.368449	SAOUHSC_00580	UPF0741 protein SAOUHSC_00580	no	0	not assigned
Q2G0I5	Q2G0I5_C8	NTFLIUDECQAVNIR	-0.0781981	-0.201244	0.135272	0.0589399	-0.00962912	SAOUHSC_00580	UPF0741 protein SAOUHSC_00580	no	0	not assigned
Q2G0I6	Q2G0I6_C304	YLUDIAEK	-0.219497	-0.103703	-0.122218	0.196859	-0.112961	SAOUHSC_00579	Phosphomevalonate kinase	yes	ATP binding [GO:0005524]; phosphomevalonate kinase activity [GO:0004631]	Enzyme
Q2G0I6	Q2G0I6_C324	TSGAGGGDUGITIINK	-0.00320899	0.110484	0.178863	0.11363	0.112057	SAOUHSC_00579	Phosphomevalonate kinase	yes	ATP binding [GO:0005524]; phosphomevalonate kinase activity [GO:0004631]	Enzyme
Q2G0I6	Q2G0I6_C95	SUDIAMK	-0.146164	-0.0660044			-0.106084	SAOUHSC_00579	Phosphomevalonate kinase	yes	ATP binding [GO:0005524]; phosphomevalonate kinase activity [GO:0004631]	Enzyme
Q2G0I7	Q2G0I7_C278	EAGYPUYFTMDAGPNVK						SAOUHSC_00578	Diphosphomevalonate decarboxylase	yes	ATP binding [GO:0005524]; diphosphomevalonate decarboxylase activity [GO:0004163]	Enzyme
Q2G0I8	Q2G0I8_C196	LUEDPQYMSHVK	-0.18085	0.041986	0.0563061	-0.024722	0.00863201	SAOUHSC_00577	Mevalonate kinase, putative	yes	ATP binding [GO:0005524]; mevalonate kinase activity [GO:0004496]	Enzyme
Q2G0I8	Q2G0I8_C234	ASDVIEHHNFEALADIFNEUHADLK	-0.115144	0.208018	-0.0247514	0.201383	0.0883158	SAOUHSC_00577	Mevalonate kinase, putative	yes	ATP binding [GO:0005524]; mevalonate kinase activity [GO:0004496]	Enzyme
Q2G0I9	Q2G0I9_C214	FKYPEIEPSUMASLETLLNK	-0.0660044	-0.108037	-0.0367922		-0.0660044	lipL	Octanoyl-[GcvH]:protein N-octanoyltransferase	yes	octanoyltransferase activity [GO:0016415]	Enzyme
Q2G0I9	Q2G0I9_C35	YIDHSSGLEPMQSFAFDDTFUESVGK						lipL	Octanoyl-[GcvH]:protein N-octanoyltransferase	yes	octanoyltransferase activity [GO:0016415]	Enzyme
Q2G0J0	Q2G0J0_C310	GUSIEDVYNLSIITAAQALQ	-0.213788	-0.332716	-0.295889	0.0416635	-0.254839	SAOUHSC_00574	Phosphate acetyltransferase	yes	phosphate acetyltransferase activity [GO:0008959]	Enzyme
Q2G0J1	Q2G0J1_C143	LYPELPHSDYIUFYPMNK	-0.29622	0.696115	0.0878642	-0.202721	-0.0574286	SAOUHSC_00573	Putative heme-dependent peroxidase SAOUHSC_00573	no	metal ion binding [GO:0046872]; peroxidase activity [GO:0004601]	Enzyme
Q2G0J7	Q2G0J7_C174	LIDTSKHUIIK	0.0185663	0.0399806	-0.0222046	-0.0528285	-0.00181918	ung	Uracil-DNA glycosylase	no	uracil DNA N-glycosylase activity [GO:0004844]	Gene expression and Nucleic acid binding
Q2G0J7	Q2G0J7_C97	ELADDIGUVR						ung	Uracil-DNA glycosylase	no	uracil DNA N-glycosylase activity [GO:0004844]	Gene expression and Nucleic acid binding
Q2G0J8	Q2G0J8_C110	AGEVYEASNAQYFVVDPVMVUK	0.425889	0.489748	0.988485		0.489748	SAOUHSC_00562	Phosphomethylpyrimidine kinase	no	ATP binding [GO:0005524]; phosphomethylpyrimidine kinase activity [GO:0008972]	Enzyme
Q2G0K5	Q2G0K5_C20	KUGEVATQSAFK	-0.0748817	-0.0317691	0.0720372	0.00633393	-0.0127176	SAOUHSC_00555	Hydrolase, haloacid dehalogenase-like	no	phosphoglycolate phosphatase activity [GO:0008967]	Enzyme
Q2G0K5	Q2G0K5_C32	AUGLTEPSSK	-0.180266	-0.0429175	0.0357647	0.0745054	-0.00357641	SAOUHSC_00555	Hydrolase, haloacid dehalogenase-like	no	phosphoglycolate phosphatase activity [GO:0008967]	Enzyme
Q2G0K8	Q2G0K8_C18	KQASFYVAUELYK		-0.16385	-0.118351		-0.1411	nagB	Glucosamine-6-phosphate deaminase	no	glucosamine-6-phosphate deaminase activity [GO:0004342]	Enzyme
Q2G0K8	Q2G0K8_C239	HPNVEIYLDDEAUPK	-0.154843	-0.0267635	0.128161	-0.020516	-0.0236397	nagB	Glucosamine-6-phosphate deaminase	no	glucosamine-6-phosphate deaminase activity [GO:0004342]	Enzyme
Q2G0K8	Q2G0K8_C30	EMAFNQHUK	0.00259452	-0.145941	0.164143	0.0761486	0.0393716	nagB	Glucosamine-6-phosphate deaminase	no	glucosamine-6-phosphate deaminase activity [GO:0004342]	Enzyme
Q2G0L0	Q2G0L0_C39	GIPVTYAULTLGQMGR	-0.312491	0.167101	-0.0514889	-0.229535	-0.140512	SAOUHSC_00550	Uncharacterized protein	no	0	not assigned
Q2G0L0	Q2G0L0_C72	ELEEAUK	-0.550676	-0.232633	-0.0980268	-0.0499646	-0.16533	SAOUHSC_00550	Uncharacterized protein	no	0	not assigned
Q2G0L1	Q2G0L1_C176	ELTIEATVTTLUPCSK	-0.225093	-0.154426	0.342213	-0.191656	-0.173041	folE2	GTP cyclohydrolase FolE2	yes	GTP cyclohydrolase I activity [GO:0003934]	Enzyme							Site		Functional site
Q2G0L1	Q2G0L1_C178	ELTIEATVTTLCPUSK	-0.503875	-0.418774	-0.196277	-0.388847	-0.40381	folE2	GTP cyclohydrolase FolE2	yes	GTP cyclohydrolase I activity [GO:0003934]	Enzyme							Site		Functional site
Q2G0L2	Q2G0L2_C148	GFLSUSR	-0.19952	-0.209945	0.26111	-0.107803	-0.153662	SAOUHSC_00548	Uncharacterized protein	no	transferase activity, transferring glycosyl groups [GO:0016757]	Enzyme
Q2G0L2	Q2G0L2_C160	QQTLUEFFYNPEGDTKLEK	-0.312491	-0.417271	0.0743684	-0.0235044	-0.167998	SAOUHSC_00548	Uncharacterized protein	no	transferase activity, transferring glycosyl groups [GO:0016757]	Enzyme
Q2G0L2	Q2G0L2_C36	EMGRPAQUVFLSWNR	-0.060623	0.0159257	0.0291348	-0.0787922	-0.0223486	SAOUHSC_00548	Uncharacterized protein	no	transferase activity, transferring glycosyl groups [GO:0016757]	Enzyme
Q2G0L2	Q2G0L2_C87	NEPFDWLSYWTDEUHYTLK	-0.470969	0.248899			-0.111035	SAOUHSC_00548	Uncharacterized protein	no	transferase activity, transferring glycosyl groups [GO:0016757]	Enzyme
Q2G0L3	Q2G0L3_C282	QUQDISQYIENK	-0.294824	-0.324389	-0.00941296	0.735609	-0.152118	SAOUHSC_00547	Uncharacterized protein	no	transferase activity, transferring glycosyl groups [GO:0016757]	Enzyme
Q2G0L8	Q2G0L8_C64	AFYEAQAPVADTDLTVPYIULNGAEVR		-0.796836		0.128953	-0.333942	SAOUHSC_00542	Uncharacterized protein	no	hydrolase activity [GO:0016787]	not assigned
Q2G0L9	Q2G0L9_C109	GGUSGSLMNLLQQSNFNHR	-0.571086	-0.561154			-0.56612	tadA	tRNA-specific adenosine deaminase	no	tRNA-specific adenosine-34 deaminase activity [GO:0052717]; zinc ion binding [GO:0008270]	Gene expression and Nucleic acid binding
Q2G0L9	Q2G0L9_C137	EAUSTLLTTFFK						tadA	tRNA-specific adenosine deaminase	no	tRNA-specific adenosine-34 deaminase activity [GO:0052717]; zinc ion binding [GO:0008270]	Gene expression and Nucleic acid binding
Q2G0M0	Q2G0M0_C62	WSFQTEMFFLUNR	0.0923428	0.0901759	0.139862	0.113434	0.102888	SAOUHSC_00540	Uncharacterized protein	no	ATP binding [GO:0005524]; nucleoside kinase activity [GO:0019206]	Enzyme
Q2G0M1	Q2G0M1_C181	YDDWINSFNAUPVVR	-0.199241	0.0534908	-0.0143374	0.0119976	-0.0011699	SAOUHSC_00539	Uncharacterized protein	no	ATP binding [GO:0005524]; nucleoside kinase activity [GO:0019206]	Enzyme
Q2G0M5	Q2G0M5_C153	VAGELLUQYYFK	-0.0547698	0.058335	0.129366	-0.179981	0.00178259	SAOUHSC_00535	Uncharacterized epimerase/dehydratase SAOUHSC_00535	no	catalytic activity [GO:0003824]; coenzyme binding [GO:0050662]	Enzyme
Q2G0M5	Q2G0M5_C287	QGIANSWPDSIDTSUSR	0.0122208	0.110049	0.0930192	-0.0127082	0.05262	SAOUHSC_00535	Uncharacterized epimerase/dehydratase SAOUHSC_00535	no	catalytic activity [GO:0003824]; coenzyme binding [GO:0050662]	Enzyme
Q2G0M6	Q2G0M6_C198	SNUGLGFK	0.361544	0.402722	0.370053	0.334111	0.365798	araB	Ribulokinase	no	ATP binding [GO:0005524]; ribulokinase activity [GO:0008741]	Enzyme
Q2G0M6	Q2G0M6_C293	DKEMTMVMGTSTUHLMLNEK	-0.242618	0.252416	2.09349		0.252416	araB	Ribulokinase	no	ATP binding [GO:0005524]; ribulokinase activity [GO:0008741]	Enzyme
Q2G0M6	Q2G0M6_C394	SVLSDSNLTGUIFGLTLQTK	0.322966	0.393855	0.231064		0.322966	araB	Ribulokinase	no	ATP binding [GO:0005524]; ribulokinase activity [GO:0008741]	Enzyme
Q2G0M6	Q2G0M6_C439	VFAUGGIPK	-0.0602168	0.0977456	0.29725	0.286053	0.191899	araB	Ribulokinase	no	ATP binding [GO:0005524]; ribulokinase activity [GO:0008741]	Enzyme
Q2G0M7	Q2G0M7_C214	SPLEGYSVUVFPDSLDEGANIEIGYLPGR	-0.295596	-0.467166			-0.381381	hchA	Protein/nucleic acid deglycase HchA	no	DNA binding transcription factor activity [GO:0003700]; hydrolase activity [GO:0016787]; protein deglycase activity [GO:0036524]	Enzyme
Q2G0M8	Q2G0M8_C113	GTEAAIAYQSGFNUNMAAISAVMNK	-0.143383	0.0922725	-0.554084	-0.391389	-0.267386	SAOUHSC_00532	Uncharacterized protein	no	pyridoxal phosphate binding [GO:0030170]; transferase activity [GO:0016740]	not assigned
Q2G0M8	Q2G0M8_C142	NDAILSDELNHASIIDGUR	-0.159331	0.08882	-0.0886689	-0.409911	-0.124	SAOUHSC_00532	Uncharacterized protein	no	pyridoxal phosphate binding [GO:0030170]; transferase activity [GO:0016740]	not assigned
Q2G0M9	Q2G0M9_C254	QAVLSFGMIQAGTTDSVIPDQAFUK	-0.0411351	0.00561557	0.192699	-0.111025	-0.0177597	SAOUHSC_00531	Uncharacterized protein	no	hydrolase activity [GO:0016787]	not assigned
Q2G0M9	Q2G0M9_C348	VRPGAFFLTGUGNESK	-0.0624748	-0.732668	0.088413	0.207018	0.0129691	SAOUHSC_00531	Uncharacterized protein	no	hydrolase activity [GO:0016787]	not assigned
Q2G0N0	Q2G0N0_C82	HYAHVDUPGHADYVK	-0.324997	-0.272479	-0.0767823	-0.0789903	-0.175734	tuf	Elongation factor Tu	yes	GTPase activity [GO:0003924]; GTP binding [GO:0005525]; translation elongation factor activity [GO:0003746]	Gene expression and Nucleic acid binding						Nucleotide binding			Functional site
Q2G0N1	Q2G0N1_C258	QATTNVEFYPVLUGTAFK	-0.283826	-0.157641	-0.00285937	-0.0382581	-0.0979494	fusA	Elongation factor G	yes	GTPase activity [GO:0003924]; GTP binding [GO:0005525]; translation elongation factor activity [GO:0003746]	Gene expression and Nucleic acid binding
Q2G0N1	Q2G0N1_C390	DTGTGDTLUGEK	-0.442301	-0.0335843	-0.115676	0.00259452	-0.07463	fusA	Elongation factor G	yes	GTPase activity [GO:0003924]; GTP binding [GO:0005525]; translation elongation factor activity [GO:0003746]	Gene expression and Nucleic acid binding
Q2G0N1	Q2G0N1_C473	EFNVEUNVGAPMVSYR	-0.233142	-0.181755	-0.0171104	-0.0403337	-0.111044	fusA	Elongation factor G	yes	GTPase activity [GO:0003924]; GTP binding [GO:0005525]; translation elongation factor activity [GO:0003746]	Gene expression and Nucleic acid binding
Q2G0N1	Q2G0N1_C596	KUDPVILEPMMK	-0.376668	-0.330959	-0.47299	-0.286251	-0.353813	fusA	Elongation factor G	yes	GTPase activity [GO:0003924]; GTP binding [GO:0005525]; translation elongation factor activity [GO:0003746]	Gene expression and Nucleic acid binding
Q2G0N5	Q2G0N5_C355	MYQUGLPK	-0.118758	-0.157126	0.0254541	-0.0301919	-0.0744751	rpoC	DNA-directed RNA polymerase subunit beta'	yes	DNA binding [GO:0003677]; DNA-directed 5'-3' RNA polymerase activity [GO:0003899]	Gene expression and Nucleic acid binding
Q2G0N5	Q2G0N5_C48	DGLFUER	-0.152287	-0.290737	-0.0359666	-0.0876422	-0.119964	rpoC	DNA-directed RNA polymerase subunit beta'	yes	DNA binding [GO:0003677]; DNA-directed 5'-3' RNA polymerase activity [GO:0003899]	Gene expression and Nucleic acid binding
Q2G0N5	Q2G0N5_C60	DWEUSCGK	-0.10758	-0.187606	0.118011	0.349772	0.0052155	rpoC	DNA-directed RNA polymerase subunit beta'	yes	DNA binding [GO:0003677]; DNA-directed 5'-3' RNA polymerase activity [GO:0003899]	Gene expression and Nucleic acid binding
Q2G0N5	Q2G0N5_C62	DWECSUGK	-0.427363	-0.449513	0.0265876	0.0261627	-0.2006	rpoC	DNA-directed RNA polymerase subunit beta'	yes	DNA binding [GO:0003677]; DNA-directed 5'-3' RNA polymerase activity [GO:0003899]	Gene expression and Nucleic acid binding
Q2G0N5	Q2G0N5_C75	YKGMVUDR	-0.163365	-0.541009	0.14952	-0.0300446	-0.0967047	rpoC	DNA-directed RNA polymerase subunit beta'	yes	DNA binding [GO:0003677]; DNA-directed 5'-3' RNA polymerase activity [GO:0003899]	Gene expression and Nucleic acid binding
Q2G0N5	Q2G0N5_C822	EEDUGTDR	-0.501075	-0.213086	-0.0498004	-0.177376	-0.195231	rpoC	DNA-directed RNA polymerase subunit beta'	yes	DNA binding [GO:0003677]; DNA-directed 5'-3' RNA polymerase activity [GO:0003899]	Gene expression and Nucleic acid binding
Q2G0N5	Q2G0N5_C896	SAFTUNAR	-0.357733	-0.352068	0.0196308	-0.201112	-0.27659	rpoC	DNA-directed RNA polymerase subunit beta'	yes	DNA binding [GO:0003677]; DNA-directed 5'-3' RNA polymerase activity [GO:0003899]	Gene expression and Nucleic acid binding
Q2G0N7	Q2G0N7_C69	IADVGUGYGPIGLMIAK	-0.136204	-0.0500244	-0.00640534	-0.092617	-0.0713207	SAOUHSC_00523	Uncharacterized protein	no	S-adenosylmethionine-dependent methyltransferase activity [GO:0008757]	not assigned
Q2G0P5	Q2G0P5_C311	GELQUIGATTLDEYR	-0.38164	-0.137667	-0.173171	-0.0714309	-0.155419	clpC	ATP-dependent Clp protease ATP-binding subunit ClpC	no	ATP binding [GO:0005524]	not assigned
Q2G0P6	Q2G0P6_C157	SLDISYDEQLGYLTTUPTNIGTGMR	0.319271			0.313362	0.316317	mcsB	Protein-arginine kinase	no	ATP binding [GO:0005524]; kinase activity [GO:0016301]; phosphotransferase activity, nitrogenous group as acceptor [GO:0016775]	Enzyme
Q2G0P6	Q2G0P6_C270	SLGILQNUR	-0.237507	-0.458981	-0.412097	-0.279967	-0.346032	mcsB	Protein-arginine kinase	no	ATP binding [GO:0005524]; kinase activity [GO:0016301]; phosphotransferase activity, nitrogenous group as acceptor [GO:0016775]	Enzyme
Q2G0P7	Q2G0P7_C105	FGUANCYATFK	0.0661528	0.103397	0.269392	0.248357	0.175877	mcsA	Protein-arginine kinase activator protein	no	cadmium ion binding [GO:0046870]; cobalt ion binding [GO:0050897]; copper ion binding [GO:0005507]; DNA binding [GO:0003677]; zinc ion binding [GO:0008270]	Gene expression and Nucleic acid binding
Q2G0P7	Q2G0P7_C108	FGCANUYATFKDDIIDIVR	0.169155	0.123931		0.513895	0.169155	mcsA	Protein-arginine kinase activator protein	no	cadmium ion binding [GO:0046870]; cobalt ion binding [GO:0050897]; copper ion binding [GO:0005507]; DNA binding [GO:0003677]; zinc ion binding [GO:0008270]	Gene expression and Nucleic acid binding
Q2G0P7	Q2G0P7_C3	MLUENCQLNEAELK	-0.592963	0.403922	0.477574	-0.356088	0.0239168	mcsA	Protein-arginine kinase activator protein	no	cadmium ion binding [GO:0046870]; cobalt ion binding [GO:0050897]; copper ion binding [GO:0005507]; DNA binding [GO:0003677]; zinc ion binding [GO:0008270]	Gene expression and Nucleic acid binding
Q2G0P7	Q2G0P7_C87	RUPSCHMTLK	-0.788514	-0.758624	-0.443379	-0.790734	-0.773569	mcsA	Protein-arginine kinase activator protein	no	cadmium ion binding [GO:0046870]; cobalt ion binding [GO:0050897]; copper ion binding [GO:0005507]; DNA binding [GO:0003677]; zinc ion binding [GO:0008270]	Gene expression and Nucleic acid binding
Q2G0P7	Q2G0P7_C90	RCPSUHMTLK	-0.811118	-0.55368	-0.491348	-0.607836	-0.580758	mcsA	Protein-arginine kinase activator protein	no	cadmium ion binding [GO:0046870]; cobalt ion binding [GO:0050897]; copper ion binding [GO:0005507]; DNA binding [GO:0003677]; zinc ion binding [GO:0008270]	Gene expression and Nucleic acid binding
Q2G0P8	Q2G0P8_C37	FDUVPSQLNYVIK	0.213636	0.271495	0.17203	0.58897	0.242566	ctsR	Transcriptional regulator CtsR	no	DNA binding [GO:0003677]	Gene expression and Nucleic acid binding
Q2G0Q0	Q2G0Q0_C145	VGQGVDILUK	-0.338287	-0.0636655	-0.4353	-0.0486062	-0.200976	pdxT	Pyridoxal 5'-phosphate synthase subunit PdxT	no	glutaminase activity [GO:0004359]; pyridoxal 5'-phosphate synthase (glutamine hydrolysing) activity [GO:0036381]	Enzyme
Q2G0Q0	Q2G0Q0_C75	EALQNSTLPMFGTUAGLIVLAQDIVGEEGYLNK	-0.116364	0.175045			0.029341	pdxT	Pyridoxal 5'-phosphate synthase subunit PdxT	no	glutaminase activity [GO:0004359]; pyridoxal 5'-phosphate synthase (glutamine hydrolysing) activity [GO:0036381]	Enzyme			Active site						Functional site
Q2G0Q1	Q2G0Q1_C128	DQFTVPFVUGCR	-0.133321	-0.225439	0.148609	-0.129371	-0.131346	pdxS	Pyridoxal 5'-phosphate synthase subunit PdxS	no	pyridoxal 5'-phosphate synthase (glutamine hydrolysing) activity [GO:0036381]	Enzyme
Q2G0Q1	Q2G0Q1_C130	DQFTVPFVCGUR	0.0522014	-0.154518	0.20114	-0.0823811	-0.0150899	pdxS	Pyridoxal 5'-phosphate synthase subunit PdxS	no	pyridoxal 5'-phosphate synthase (glutamine hydrolysing) activity [GO:0036381]	Enzyme
Q2G0Q5	Q2G0Q5_C80	TEEULHR	-0.131108	-0.0443896	0.128953	-0.0209844	-0.032687	SAOUHSC_00491	2-amino-4-hydroxy-6-hydroxymethyldihydropteridine pyrophosphokinase	yes	2-amino-4-hydroxy-6-hydroxymethyldihydropteridine diphosphokinase activity [GO:0003848]; kinase activity [GO:0016301]	Enzyme
Q2G0Q7	Q2G0Q7_C94	SEVAEAULK	-0.0713303	0.00417776	-0.231972	-0.0463697	-0.05885	SAOUHSC_00489	Dihydropteroate synthase	yes	dihydropteroate synthase activity [GO:0004156]; metal ion binding [GO:0046872]	Enzyme
Q2G0Q8	Q2G0Q8_C85	IKPGDTIVEPTSGNTGIGLAFVUAAK	-0.536524	-0.171498	-0.323967	-0.310361	-0.317164	SAOUHSC_00488	Cysteine synthase	no	cysteine synthase activity [GO:0004124]; L-cysteine desulfhydrase activity [GO:0080146]; pyridoxal phosphate binding [GO:0030170]	Enzyme
Q2G0Q9	Q2G0Q9_C238	MPVQFEUNCSHEK	-0.52137	-0.202257	-0.0530895	-0.640591	-0.361813	hslO	33 kDa chaperonin	no	unfolded protein binding [GO:0051082]	Modulator/Scaffolding/Adaptor
Q2G0Q9	Q2G0Q9_C271	EDHGAEAVUHFCGNK	-0.887788	-1.23353	-0.418697	-0.628921	-0.758354	hslO	33 kDa chaperonin	no	unfolded protein binding [GO:0051082]	Modulator/Scaffolding/Adaptor
Q2G0Q9	Q2G0Q9_C274	EDHGAEAVCHFUGNK	-1.20088	-0.782893			-0.991886	hslO	33 kDa chaperonin	no	unfolded protein binding [GO:0051082]	Modulator/Scaffolding/Adaptor
Q2G0R0	Q2G0R0_C259	NAPUIIFIDEIDAVGR	-0.183533	-0.134226	-0.646921	-0.410661	-0.297097	ftsH	ATP-dependent zinc metalloprotease FtsH	no	ATP binding [GO:0005524]; ATP-dependent peptidase activity [GO:0004176]; metalloendopeptidase activity [GO:0004222]; metallopeptidase activity [GO:0008237]; zinc ion binding [GO:0008270]	Enzyme	membrane/cell wall
Q2G0R0	Q2G0R0_C480	IUGLLGGR	-0.424092	-0.0788326	-0.290351	-0.272055	-0.281203	ftsH	ATP-dependent zinc metalloprotease FtsH	no	ATP binding [GO:0005524]; ATP-dependent peptidase activity [GO:0004176]; metalloendopeptidase activity [GO:0004222]; metallopeptidase activity [GO:0008237]; zinc ion binding [GO:0008270]	Enzyme	membrane/cell wall
Q2G0R1	Q2G0R1_C19	EVLLTEEDIQNIUK						SAOUHSC_00485	Hypoxanthine phosphoribosyltransferase	no	guanine phosphoribosyltransferase activity [GO:0052657]; hypoxanthine phosphoribosyltransferase activity [GO:0004422]; metal ion binding [GO:0046872]; nucleotide binding [GO:0000166]	Enzyme
Q2G0R1	Q2G0R1_C37	DYQGKPLVUVGILK	-0.865017	-0.916753	-1.1121	-0.731733	-0.890885	SAOUHSC_00485	Hypoxanthine phosphoribosyltransferase	no	guanine phosphoribosyltransferase activity [GO:0052657]; hypoxanthine phosphoribosyltransferase activity [GO:0004422]; metal ion binding [GO:0046872]; nucleotide binding [GO:0000166]	Enzyme
Q2G0R2	Q2G0R2_C44	LTULHVNHGVR	-0.650646	-0.39926	0.42975	-0.245303	-0.322282	tilS	tRNA(Ile)-lysidine synthase	yes	ATP binding [GO:0005524]; ligase activity, forming carbon-nitrogen bonds [GO:0016879]	Enzyme
Q2G0R8	Q2G0R8_C378	FSUKPVQQFYGQYDIMR	0.0444641	-0.0712696			-0.0134028	mfd	Transcription-repair-coupling factor	no	ATP binding [GO:0005524]; damaged DNA binding [GO:0003684]; helicase activity [GO:0004386]	Gene expression and Nucleic acid binding
Q2G0R8	Q2G0R8_C645	LLUGDVGYGK	0.121546	0.285106	0.215616	0.0717627	0.168581	mfd	Transcription-repair-coupling factor	no	ATP binding [GO:0005524]; damaged DNA binding [GO:0003684]; helicase activity [GO:0004386]	Gene expression and Nucleic acid binding						Nucleotide binding			Functional site
Q2G0R9	Q2G0R9_C3	MKUIVGLGNIGK			-0.46951	0.213254	-0.128128	pth	Peptidyl-tRNA hydrolase	yes	aminoacyl-tRNA hydrolase activity [GO:0004045]	Gene expression and Nucleic acid binding
Q2G0S2	Q2G0S2_C173	DDPNINPEEUVVVSPDHGGVTR	-0.158476	0.0612712	0.0411835	0.159753	0.0512274	prs	Ribose-phosphate pyrophosphokinase	yes	ATP binding [GO:0005524]; kinase activity [GO:0016301]; magnesium ion binding [GO:0000287]; ribose phosphate diphosphokinase activity [GO:0004749]	Enzyme
Q2G0S2	Q2G0S2_C255	EVYAUCTHPVLSGPAK	-0.00137121	0.191904	0.391438	0.242084	0.216994	prs	Ribose-phosphate pyrophosphokinase	yes	ATP binding [GO:0005524]; kinase activity [GO:0016301]; magnesium ion binding [GO:0000287]; ribose phosphate diphosphokinase activity [GO:0004749]	Enzyme
Q2G0S2	Q2G0S2_C256	EVYACUTHPVLSGPAK						prs	Ribose-phosphate pyrophosphokinase	yes	ATP binding [GO:0005524]; kinase activity [GO:0016301]; magnesium ion binding [GO:0000287]; ribose phosphate diphosphokinase activity [GO:0004749]	Enzyme
Q2G0S3	Q2G0S3_C100	EGTTIVVUGDTPLITK	-0.279143	-0.255939	-0.18301	-0.147666	-0.219475	glmU	Bifunctional protein GlmU	yes	glucosamine-1-phosphate N-acetyltransferase activity [GO:0019134]; magnesium ion binding [GO:0000287]; UDP-N-acetylglucosamine diphosphorylase activity [GO:0003977]	Enzyme								Metall binding	Functional site
Q2G0S3	Q2G0S3_C379	TNIGUGTITVNYDGENK	-0.231694	-0.0228392	0.0947654	0.00635628	-0.00824146	glmU	Bifunctional protein GlmU	yes	glucosamine-1-phosphate N-acetyltransferase activity [GO:0019134]; magnesium ion binding [GO:0000287]; UDP-N-acetylglucosamine diphosphorylase activity [GO:0003977]	Enzyme				Binding site					Functional site
Q2G0S6	Q2G0S6_C103	SUVEVAR	-0.311291	0.180912	0.208517	0.0581086	0.11951	SAOUHSC_00468	Uncharacterized protein	no	0	not assigned
Q2G0S8	Q2G0S8_C139	IGTDIPFUIYNK	0.29678	0.406754	0.547154	0.635987	0.476954	SAOUHSC_00466	Putative 4-diphosphocytidyl-2-C-methyl-D-erythritol kinase	no	4-(cytidine 5'-diphospho)-2-C-methyl-D-erythritol kinase activity [GO:0050515]; ATP binding [GO:0005524]	Enzyme			Active site						Functional site
Q2G0S8	Q2G0S8_C147	TALUTGR	0.166748	0.202774	0.267716	0.524742	0.235245	SAOUHSC_00466	Putative 4-diphosphocytidyl-2-C-methyl-D-erythritol kinase	no	4-(cytidine 5'-diphospho)-2-C-methyl-D-erythritol kinase activity [GO:0050515]; ATP binding [GO:0005524]	Enzyme
Q2G0S8	Q2G0S8_C271	NIYNAVNGUCNEVYLVR	-0.0985055	0.236217			0.0688558	SAOUHSC_00466	Putative 4-diphosphocytidyl-2-C-methyl-D-erythritol kinase	no	4-(cytidine 5'-diphospho)-2-C-methyl-D-erythritol kinase activity [GO:0050515]; ATP binding [GO:0005524]	Enzyme
Q2G0S9	Q2G0S9_C14	NSIDUHVGNR	-0.144489	-0.127179	0.112633	-0.0231818	-0.0751805	SAOUHSC_00465	Uncharacterized protein	no	0	not assigned
Q2G0T0	Q2G0T0_C121	ANIKEAVENHLQDUEK	-0.214257	-0.180005	-0.105458	-0.137108	-0.158557	rsmA	Ribosomal RNA small subunit methyltransferase A	no	16S rRNA (adenine(1518)-N(6)/adenine(1519)-N(6))-dimethyltransferase activity [GO:0052908]; RNA binding [GO:0003723]; rRNA (adenine-N6,N6-)-dimethyltransferase activity [GO:0000179]	Gene expression and Nucleic acid binding
Q2G0T3	Q2G0T3_C69	ELTYCSVCGHITENDPUYICEDKQR	0.449429	0.482229	0.70248	0.208642	0.465829	recR	Recombination protein RecR	no	DNA binding [GO:0003677]; metal ion binding [GO:0046872]	Gene expression and Nucleic acid binding
Q2G0T3	Q2G0T3_C83	SVIUVVEDDKDVIAMEK	-0.157508	-0.132246	0.161454	0.118493	-0.00687661	recR	Recombination protein RecR	no	DNA binding [GO:0003677]; metal ion binding [GO:0046872]	Gene expression and Nucleic acid binding
Q2G0T5	Q2G0T5_C190	FVADAQQIEUEDEALAFIAK	-0.250466	0.215419	-0.414191	-0.0672131	-0.158839	dnaX	DNA polymerase III subunit gamma/tau	yes	ATP binding [GO:0005524]; DNA binding [GO:0003677]; DNA-directed DNA polymerase activity [GO:0003887]	Gene expression and Nucleic acid binding
Q2G0T5	Q2G0T5_C475	FEEEIHUEIVNKDDEKR	-0.225751	-0.482452	0.120086		-0.225751	dnaX	DNA polymerase III subunit gamma/tau	yes	ATP binding [GO:0005524]; DNA binding [GO:0003677]; DNA-directed DNA polymerase activity [GO:0003887]	Gene expression and Nucleic acid binding
Q2G0T5	Q2G0T5_C493	SSIESVVUNIVNK	-0.198527	-0.0153888	-0.0404524	-0.0529249	-0.0466886	dnaX	DNA polymerase III subunit gamma/tau	yes	ATP binding [GO:0005524]; DNA binding [GO:0003677]; DNA-directed DNA polymerase activity [GO:0003887]	Gene expression and Nucleic acid binding
Q2G0T6	Q2G0T6_C46	SPUYNFELEVIAK	-0.366459	-0.108151	-0.0336492	-0.222267	-0.165209	SAOUHSC_00441	Uncharacterized protein	no	0	not assigned
Q2G0T9	Q2G0T9_C257	QTFGNTDMMTIGEMSSTTIENUIK	-0.103612	0.0517201		-0.17643	-0.103612	SAOUHSC_00438	Alpha amylase family protein, putative	no	alpha,alpha-phosphotrehalase activity [GO:0008788]	Enzyme
Q2G0T9	Q2G0T9_C320	GIYDGGGWNAIFWUNHDQPR	-0.568238	-0.271879	-0.181264	-0.110869	-0.226572	SAOUHSC_00438	Alpha amylase family protein, putative	no	alpha,alpha-phosphotrehalase activity [GO:0008788]	Enzyme
Q2G0U0	Q2G0U0_C27	ENLEAATHUVTR	-0.560367	-0.0592072	-0.254112	-0.137074	-0.195593	SAOUHSC_00437	Uncharacterized protein	no	kinase activity [GO:0016301]; protein-N(PI)-phosphohistidine-sugar phosphotransferase activity [GO:0008982]; protein-phosphocysteine-trehalose phosphotransferase system transporter activity [GO:0090589]; trehalose transmembrane transporter activity [GO:0015574]	Receptor/Transporter/Channel	membrane/cell wall		Active site						Functional site
Q2G0U3	Q2G0U3_C264	TIUAITK	-0.282911	-0.228954	-0.180904	-0.252896	-0.240925	SAOUHSC_00434	Transcriptional regulator, lysR family, putative	no	DNA binding [GO:0003677]; DNA binding transcription factor activity [GO:0003700]	Gene expression and Nucleic acid binding
Q2G0U6	Q2G0U6_C60	QUVAFFTLHR			-0.394089	-0.230855	-0.312472	SAOUHSC_00430	Uncharacterized protein	no	peptide alpha-N-acetyltransferase activity [GO:0004596]	Enzyme
Q2G0U7	Q2G0U7_C6	CVULVEETADK	-0.324105	-0.39623	0.0357887	-0.12685	-0.225478	SAOUHSC_00429	MutT/nudix family protein, putative	no	hydrolase activity [GO:0016787]	not assigned
Q2G0U9	Q2G0U9_C235	GYNTPVFSHQNLYTWGQUTYHVFNR	0.0751903	-0.0082614	0.412727	0.0529723	0.0640813	sle1	N-acetylmuramoyl-L-alanine amidase sle1	no	N-acetylmuramoyl-L-alanine amidase activity [GO:0008745]	Enzyme	membrane/cell wall	secreted
Q2G0V7	Q2G0V7_C46	HLAAELNDQGFSUYAPNYPGHGLLLK	-0.21088	-0.14073	-0.254289	0.237564	-0.175805	SAOUHSC_00417	Uncharacterized protein	no	carboxylic ester hydrolase activity [GO:0052689]; lipase activity [GO:0016298]	Enzyme	membrane/cell wall
Q2G0W0	Q2G0W0_C56	VUSTNEGLLNIK	-0.0690915	-0.00723713	0.061564	0.111742	0.0271634	SAOUHSC_00414	Uncharacterized protein	no	0	not assigned
Q2G0W1	Q2G0W1_C296	SVAKDUESR	-0.13976	0.0869196	0.224534	0.224164	0.155542	SAOUHSC_00413	UPF0753 protein SAOUHSC_00413	no	0	not assigned
Q2G0W1	Q2G0W1_C424	AQIAFUIDVR	-0.0664274	0.0784732	0.0418037	0.14978	0.0601384	SAOUHSC_00413	UPF0753 protein SAOUHSC_00413	no	0	not assigned
Q2G0W1	Q2G0W1_C640	LLAMIUNRPNVR	0.0965317	0.46634	0.496207		0.46634	SAOUHSC_00413	UPF0753 protein SAOUHSC_00413	no	0	not assigned
Q2G0X6	Q2G0X6_C204	HVYDPTUGSGSLLLR	-0.231261	-0.0344854	-0.115957	0.222928	-0.0752212	SAOUHSC_00397	Type I restriction-modification system, M subunit	no	DNA binding [GO:0003677]; N-methyltransferase activity [GO:0008170]; site-specific DNA-methyltransferase (adenine-specific) activity [GO:0009007]	Gene expression and Nucleic acid binding
Q2G0Y6	Q2G0Y6_C223	VLUAMSGGVDSSVVAVLLHK	-0.295313	-0.134693	0.0396246	0.0417207	-0.047534	guaA	GMP synthase [glutamine-hydrolyzing]	yes	ATP binding [GO:0005524]; GMP synthase (glutamine-hydrolyzing) activity [GO:0003922]; GMP synthase activity [GO:0003921]; pyrophosphatase activity [GO:0016462]	Enzyme						Nucleotide binding			Functional site
Q2G0Y6	Q2G0Y6_C248	AIGDQLTUIFVDHGLLR	-0.341393	-0.142503	-0.00717357	-0.0936715	-0.118087	guaA	GMP synthase [glutamine-hydrolyzing]	yes	ATP binding [GO:0005524]; GMP synthase (glutamine-hydrolyzing) activity [GO:0003922]; GMP synthase activity [GO:0003921]; pyrophosphatase activity [GO:0016462]	Enzyme
Q2G0Y7	Q2G0Y7_C307	VGIGPGSIUTTR	0.323197	0.379732	0.170951	0.773237	0.351464	guaB	Inosine-5'-monophosphate dehydrogenase	no	IMP dehydrogenase activity [GO:0003938]; metal ion binding [GO:0046872]	Enzyme			Active site	Binding site		Nucleotide binding		Metall binding	Functional site
Q2G0Y7	Q2G0Y7_C326	VVAGVGVPQITAIYDUATEAR	-0.435141	0.169905	0.290542	-0.256811	-0.0434528	guaB	Inosine-5'-monophosphate dehydrogenase	no	IMP dehydrogenase activity [GO:0003938]; metal ion binding [GO:0046872]	Enzyme
Q2G0Y9	Q2G0Y9_C176	LEEAGLTVSSLUK	-0.0996336	-0.00858065	-0.17498	0.0391384	-0.0541071	xpt	Xanthine phosphoribosyltransferase	no	xanthine phosphoribosyltransferase activity [GO:0000310]	Enzyme
Q2G0Y9	Q2G0Y9_C76	ILTIEASGIAPAIMAALHFDVPULFAK	0.0982848	0.500394	0.686523	0.802565	0.593459	xpt	Xanthine phosphoribosyltransferase	no	xanthine phosphoribosyltransferase activity [GO:0000310]	Enzyme
Q2G101	Q2G101_C187	VENUKPYIIE	-0.269046	-0.347321	-0.116488	0.0551957	-0.192767	SAOUHSC_00359	Phosphoglycerate mutase family protein	no	catalytic activity [GO:0003824]	Enzyme
Q2G101	Q2G101_C25	SYFUGQLDVPLTDTGTK	-0.19593	-0.289757	0.00100953	-0.0290727	-0.112501	SAOUHSC_00359	Phosphoglycerate mutase family protein	no	catalytic activity [GO:0003824]	Enzyme
Q2G101	Q2G101_C44	SADDLUDYFK	-0.171613	-0.20493	-0.334254	-0.0793645	-0.188271	SAOUHSC_00359	Phosphoglycerate mutase family protein	no	catalytic activity [GO:0003824]	Enzyme
Q2G111	Q2G111_C16	VUYFTANGITHIDYK	0.0229004	0.346985	0.429	0.311968	0.329477	rpsR	30S ribosomal protein S18	yes	rRNA binding [GO:0019843]; structural constituent of ribosome [GO:0003735]	Modulator/Scaffolding/Adaptor
Q2G112	Q2G112_C51	EADFINUVVFR	-0.413144	-0.0946815	0.0591976	-0.111162	-0.102922	SAOUHSC_00349	Single-stranded DNA-binding protein	yes	single-stranded DNA binding [GO:0003697]	Gene expression and Nucleic acid binding
Q2G112	Q2G112_C97	VFVTEVVUDSVQFLEPK	-0.173835	-0.274021	-0.325434	0.0742686	-0.223928	SAOUHSC_00349	Single-stranded DNA-binding protein	yes	single-stranded DNA binding [GO:0003697]	Gene expression and Nucleic acid binding
Q2G115	Q2G115_C101	EVDAIUQVVR	-0.17909	-0.0291905	-0.0336286	0.0316775	-0.0314096	ychF	Ribosome-binding ATPase YchF	no	ATPase activity [GO:0016887]; ATP binding [GO:0005524]; GTP binding [GO:0005525]; ribosomal large subunit binding [GO:0043023]; ribosome binding [GO:0043022]	Modulator/Scaffolding/Adaptor
Q2G115	Q2G115_C306	QGMTAPQUAGIIHTDFER	-0.0903574	-0.0427688	0.0626744	0.0578315	0.00753131	ychF	Ribosome-binding ATPase YchF	no	ATPase activity [GO:0016887]; ATP binding [GO:0005524]; GTP binding [GO:0005525]; ribosomal large subunit binding [GO:0043023]; ribosome binding [GO:0043022]	Modulator/Scaffolding/Adaptor
Q2G116	Q2G116_C19	QHAUGTNR	-0.368267	-0.0758585	0.235346	-0.0284079	-0.0521332	SAOUHSC_00345	Uncharacterized protein	yes	0	not assigned
Q2G116	Q2G116_C37	IKUENCQR	-1.52031	-1.49322	-1.26878	-1.48896	-1.49109	SAOUHSC_00345	Uncharacterized protein	yes	0	not assigned
Q2G116	Q2G116_C40	IKCENUQR	-0.606145	-0.326444	0.11703	-0.186787	-0.256615	SAOUHSC_00345	Uncharacterized protein	yes	0	not assigned
Q2G122	Q2G122_C715	SLFWVNPDUGLK	-0.223913	-0.204798	-0.000476168	0.0137838	-0.102637	metE	5-methyltetrahydropteroyltriglutamate--homocysteine methyltransferase	no	5-methyltetrahydropteroyltriglutamate-homocysteine S-methyltransferase activity [GO:0003871]; methionine synthase activity [GO:0008705]; zinc ion binding [GO:0008270]	Enzyme		secreted						Metall binding	Functional site
Q2G124	Q2G124_C378	VLVTLLHQLNDEVETGLTSLUIGGGQAIAAVVSK	0.116764	0.334225	0.0862403	0.392207	0.225494	SAOUHSC_00336	Probable acetyl-CoA acyltransferase	yes	acetyl-CoA C-acetyltransferase activity [GO:0003985]; acetyl-CoA C-acyltransferase activity [GO:0003988]	Enzyme			Active site						Functional site
Q2G124	Q2G124_C88	VUGSGLK	0.143175	0.256835	0.492289	0.560036	0.374562	SAOUHSC_00336	Probable acetyl-CoA acyltransferase	yes	acetyl-CoA C-acetyltransferase activity [GO:0003985]; acetyl-CoA C-acyltransferase activity [GO:0003988]	Enzyme			Active site						Functional site
Q2G126	Q2G126_C92	HQQGQTDFETFUDEMAEAGIYK	-0.232735	-0.387374			-0.310054	SAOUHSC_00330	Uncharacterized protein	no	0	not assigned
Q2G144	Q2G144_C54	QLNAPSDIEVEHSDIMTASPEMADLFIUGR	-0.155132	-0.0779849	-0.0533889	0.0297002	-0.0656869	SAOUHSC_00311	Uncharacterized protein	no	protein-N(PI)-phosphohistidine-sugar phosphotransferase activity [GO:0008982]	Receptor/Transporter/Channel
Q2G144	Q2G144_C7	ILVVUGHGLGSSFMVEMNAQEALR	-0.424184	-0.210429	-0.46562	-0.175827	-0.317307	SAOUHSC_00311	Uncharacterized protein	no	protein-N(PI)-phosphohistidine-sugar phosphotransferase activity [GO:0008982]	Receptor/Transporter/Channel
Q2G146	Q2G146_C76	LMFVEADLSQDEHWDEAMKDUK	0.143002	-0.363364	-0.132625	0.00504062	-0.0637924	SAOUHSC_00309	Uncharacterized protein	no	3-beta-hydroxy-delta5-steroid dehydrogenase activity [GO:0003854]	Enzyme
Q2G147	Q2G147_C90	GAVNMUCILEQDTSIYGDFQR		-0.213922		-0.0350617	-0.124492	SAOUHSC_00308	Lipoate--protein ligase	no	ATP binding [GO:0005524]; ligase activity [GO:0016874]	not assigned
Q2G149	Q2G149_C113	FLGUMQANHDCIDNIIHTK						SAOUHSC_00306	Uncharacterized protein	no	0	not assigned
Q2G149	Q2G149_C209	LADQHSLNHVAFUCISTGVFAFPQDEAAEIAVR						SAOUHSC_00306	Uncharacterized protein	no	0	not assigned
Q2G157	Q2G157_C10	MLPHGLIVSUQALPDEPLHSSFIMSK	-0.017271	-0.104201	0.0184917		-0.017271	nanE	Putative N-acetylmannosamine-6-phosphate 2-epimerase	no	N-acylglucosamine-6-phosphate 2-epimerase activity [GO:0047465]	Enzyme
Q2G157	Q2G157_C199	VMDLGVHUSVVGGAITRPK	-0.249601	-0.0129328	-0.0144421	0.0268166	-0.0136874	nanE	Putative N-acetylmannosamine-6-phosphate 2-epimerase	no	N-acylglucosamine-6-phosphate 2-epimerase activity [GO:0047465]	Enzyme
Q2G157	Q2G157_C88	EVDELIESQUEVIALDATLQQRPK	-0.420434	-0.111368		0.0144981	-0.111368	nanE	Putative N-acetylmannosamine-6-phosphate 2-epimerase	no	N-acylglucosamine-6-phosphate 2-epimerase activity [GO:0047465]	Enzyme
Q2G159	Q2G159_C129	IFUMTLGTGIGGAYK	0.415759	0.0507455	0.026446	-0.107228	0.0385957	SAOUHSC_00296	ROK family protein	no	0	not assigned
Q2G159	Q2G159_C284	SKNDAALYGULQ		0.0894982	0.121413		0.105456	SAOUHSC_00296	ROK family protein	no	0	not assigned
Q2G163	Q2G163_C158	TNVTVIUAGAK	-0.109483	-0.0642385	-0.0925709	0.0556122	-0.0784047	psuG	Pseudouridine-5'-phosphate glycosidase	no	hydrolase activity, acting on glycosyl bonds [GO:0016798]; metal ion binding [GO:0046872]; pseudouridylate synthase activity [GO:0004730]	Enzyme			Active site						Functional site
Q2G164	Q2G164_C205	EALNFLUAYTTK	-0.206712	0.0962619		-0.0513693	-0.0513693	SAOUHSC_00291	PfkB family carbohydrate kinase family, putative	no	kinase activity [GO:0016301]; phosphotransferase activity, alcohol group as acceptor [GO:0016773]; sequence-specific DNA binding [GO:0043565]	Enzyme
Q2G164	Q2G164_C62	AYVLNEDYPIVUIGAANVDR	0.152119			0.794437	0.473278	SAOUHSC_00291	PfkB family carbohydrate kinase family, putative	no	kinase activity [GO:0016301]; phosphotransferase activity, alcohol group as acceptor [GO:0016773]; sequence-specific DNA binding [GO:0043565]	Enzyme
Q2G167	Q2G167_C193	AUIIVTHDER	-0.148817	0.162586	-0.0601265	0.123269	0.0315712	SAOUHSC_00287	ABC transporter, ATP-binding protein, putative	no	ATPase activity [GO:0016887]; ATP binding [GO:0005524]	not assigned
Q2G178	Q2G178_C100	DLFKEEDLEPWTSUEFDFTR	-0.257341	-0.217794	-0.281825	-0.0107181	-0.237568	SAOUHSC_00269	Uncharacterized protein	no	0	not assigned
Q2G182	Q2G182_C31	DIEAUQK	-0.686452	-0.281193	-0.30808	0.0690147	-0.294637	esxB	ESAT-6 secretion system extracellular protein B	no	0	not assigned		secreted
Q2G184	Q2G184_C1325	YAIUIADSSGEFK	0.163628		0.326537		0.245082	essC	ESAT-6 secretion machinery protein EssC	no	ATP binding [GO:0005524]; DNA binding [GO:0003677]	Gene expression and Nucleic acid binding	membrane/cell wall
Q2G185	Q2G185_C160	ALVIUAFNEK	-0.228165	-0.351479	-0.320432		-0.320432	essB	ESAT-6 secretion machinery protein EssB	no	0	not assigned	membrane/cell wall
Q2G198	Q2G198_C2	UTGFTIQTLNNQVLLGR	2.29037	2.80546	1.43007	1.88225	2.08631	SAOUHSC_00247	Uncharacterized protein	no	0	not assigned
Q2G1A8	Q2G1A8_C229	ENRPMFUK	1.74188	1.49585	1.40108	1.96872	1.61886	SAOUHSC_00237	Uncharacterized protein	no	0	not assigned
Q2G1A9	Q2G1A9_C248	IGTMISHVPIYPYSUHPK	-0.181603	-0.038061	-0.263352	-0.11616	-0.148882	SAOUHSC_00236	6-phospho-beta-glucosidase, putative	no	6-phospho-beta-glucosidase activity [GO:0008706]; beta-glucosidase activity [GO:0008422]; methyl beta-D-glucoside 6-phosphate glucohydrolase activity [GO:0103047]	Enzyme
Q2G1B0	Q2G1B0_C199	GFKUFVK			-0.0858641	-0.164318	-0.125091	SAOUHSC_00235	Uncharacterized protein	no	kinase activity [GO:0016301]; protein-N(PI)-phosphohistidine-sugar phosphotransferase activity [GO:0008982]; protein-phosphocysteine-sugar phosphotransferase activity [GO:0090563]	Receptor/Transporter/Channel	membrane/cell wall
Q2G1B7	Q2G1B7_C42	TEFEVVVVDDUSTDQTLQIVEK	-0.485055	-0.281106			-0.38308	SAOUHSC_00228	Uncharacterized protein	no	transferase activity, transferring glycosyl groups [GO:0016757]	Enzyme
Q2G1B8	Q2G1B8_C421	YUEKNNAVVLFK	-0.141542	0.326077	0.0501882	-0.413692	-0.0456766	tarL	Teichoic acid ribitol-phosphate polymerase TarL	yes	CDP-glycerol glycerophosphotransferase activity [GO:0047355]; CDP-ribitol ribitolphosphotransferase activity [GO:0047356]	Enzyme	membrane/cell wall
Q2G1B8	Q2G1B8_C59	IDGNQFVUR	-0.0789493	-0.265323	-0.180932	-0.0877876	-0.13436	tarL	Teichoic acid ribitol-phosphate polymerase TarL	yes	CDP-glycerol glycerophosphotransferase activity [GO:0047355]; CDP-ribitol ribitolphosphotransferase activity [GO:0047356]	Enzyme	membrane/cell wall
Q2G1B9	Q2G1B9_C229	IPEGLTFDHAFEUVGGR	0.133432	0.0429753	0.344387	0.20424	0.168836	tarJ	Ribulose-5-phosphate reductase 1	yes	metal ion binding [GO:0046872]; ribitol-5-phosphate 2-dehydrogenase activity [GO:0050256]	Enzyme
Q2G1C0	Q2G1C0_C196	SILSDAUK	-0.28891	-0.0477112	-0.48562	-0.30276	-0.295835	tarI	Ribitol-5-phosphate cytidylyltransferase 1	yes	2-C-methyl-D-erythritol 4-phosphate cytidylyltransferase activity [GO:0050518]; D-ribitol-5-phosphate cytidylyltransferase activity [GO:0047349]	Enzyme
Q2G1C1	Q2G1C1_C384	IUQTIFK	-0.0535236	-0.0612099	0.0787464	-0.152436	-0.0573668	tarF	Teichoic acid glycerol-phosphate transferase	yes	CDP-glycerol glycerophosphotransferase activity [GO:0047355]; transferase activity, transferring glycosyl groups [GO:0016757]	Enzyme	membrane/cell wall
Q2G1C2	Q2G1C2_C10	IDGNTFIUR	-0.312939	0.057277	-0.179596	-0.206013	-0.192804	tarK	Teichoic acid ribitol-phosphate polymerase TarK	no	CDP-glycerol glycerophosphotransferase activity [GO:0047355]; CDP-ribitol ribitolphosphotransferase activity [GO:0047356]	Enzyme	membrane/cell wall
Q2G1C2	Q2G1C2_C372	YUEKHNAVVLFK	-0.108348	0.0984196	-2.88542e-05	-0.0569564	-0.0284926	tarK	Teichoic acid ribitol-phosphate polymerase TarK	no	CDP-glycerol glycerophosphotransferase activity [GO:0047355]; CDP-ribitol ribitolphosphotransferase activity [GO:0047356]	Enzyme	membrane/cell wall
Q2G1C4	Q2G1C4_C229	IDHAFEUVGGK	0.200964	0.231669	0.559296	0.560226	0.395482	tarJ'	Ribulose-5-phosphate reductase 2	no	metal ion binding [GO:0046872]; ribitol-5-phosphate 2-dehydrogenase activity [GO:0050256]	Enzyme
Q2G1C6	Q2G1C6_C201	GTYADQQGNIYLTQEAYLSEUYHVALNAK	-0.137092	-0.0867218	-0.332807	-0.127699	-0.132396	SAOUHSC_00199	Uncharacterized protein	no	CoA-transferase activity [GO:0008410]	Enzyme
Q2G1C6	Q2G1C6_C394	LNGUGGFIDITQSVNK	0.115699	-0.125793	0.15095	0.121546	0.118623	SAOUHSC_00199	Uncharacterized protein	no	CoA-transferase activity [GO:0008410]	Enzyme
Q2G1C6	Q2G1C6_C421	IIFSGTFVAGSHVSUHNQR	-0.126014	-0.118351	0.179638	0.0615688	-0.0283911	SAOUHSC_00199	Uncharacterized protein	no	CoA-transferase activity [GO:0008410]	Enzyme
Q2G1C7	Q2G1C7_C72	KGDVIGIFAPNDIAILDLLFAUFK	-0.00792771	-0.218615	-0.374973	-0.324491	-0.271553	SAOUHSC_00198	Uncharacterized protein	no	catalytic activity [GO:0003824]	Enzyme
Q2G1C8	Q2G1C8_C143	TUFALTEPEHGSDVAGGLETVAER	-0.227641	-0.14299	-0.0880707	-0.0727255	-0.115531	SAOUHSC_00197	Uncharacterized protein	no	flavin adenine dinucleotide binding [GO:0050660]; oxidoreductase activity, acting on the CH-CH group of donors [GO:0016627]	Enzyme
Q2G1C8	Q2G1C8_C202	PHUFVVRPEQDGVDIEVIDNK	-0.231195	-0.100406	-0.0669713	-0.102267	-0.101337	SAOUHSC_00197	Uncharacterized protein	no	flavin adenine dinucleotide binding [GO:0050660]; oxidoreductase activity, acting on the CH-CH group of donors [GO:0016627]	Enzyme
Q2G1C8	Q2G1C8_C317	LAMMQGNLAQAMATUAQLANMQAHGEYDEVATSTAK	0.0585243	0.0193461	0.0546401	0.0250288	0.0398345	SAOUHSC_00197	Uncharacterized protein	no	flavin adenine dinucleotide binding [GO:0050660]; oxidoreductase activity, acting on the CH-CH group of donors [GO:0016627]	Enzyme
Q2G1D0	Q2G1D0_C379	YGMVTMUIGVGMGAAAIFEYVR	1.29478	1.34102		1.08154	1.29478	SAOUHSC_00195	Acetyl-CoA acetyltransferase, putative	no	transferase activity, transferring acyl groups other than amino-acyl groups [GO:0016747]	Enzyme	membrane/cell wall		Active site						Functional site
Q2G1D8	Q2G1D8_C123	AAUEAYGYELDEETEK	-0.0399332	-0.0204429	-0.286322	-0.0697698	-0.0548515	pflB	Formate acetyltransferase	no	formate C-acetyltransferase activity [GO:0008861]	Enzyme
Q2G1D8	Q2G1D8_C160	EMLNURK	0.0411028	-0.00904514	0.0831112	0.0255958	0.0333493	pflB	Formate acetyltransferase	no	formate C-acetyltransferase activity [GO:0008861]	Enzyme
Q2G1D8	Q2G1D8_C383	LPDNFKTYUAK	-0.267444	-0.122334	-0.50177	-0.257545	-0.262495	pflB	Formate acetyltransferase	no	formate C-acetyltransferase activity [GO:0008861]	Enzyme
Q2G1D8	Q2G1D8_C413	ESYGDDYGIAUCVSAMTIGK	0.268121	0.165596	0.414785	0.513383	0.341453	pflB	Formate acetyltransferase	no	formate C-acetyltransferase activity [GO:0008861]	Enzyme			Active site						Functional site
Q2G1D8	Q2G1D8_C414	ESYGDDYGIACUVSAMTIGK	0.619742	0.432883	0.403873	0.319166	0.418378	pflB	Formate acetyltransferase	no	formate C-acetyltransferase activity [GO:0008861]	Enzyme			Active site						Functional site
Q2G1D8	Q2G1D8_C653	IPYDUCK	0.291986	0.288998	0.5138	0.386307	0.339146	pflB	Formate acetyltransferase	no	formate C-acetyltransferase activity [GO:0008861]	Enzyme
Q2G1D8	Q2G1D8_C691	NLTSMLDGYAMQUGHHLNINVFNR	-0.189763	-0.166648	0.14991	-0.205563	-0.178205	pflB	Formate acetyltransferase	no	formate C-acetyltransferase activity [GO:0008861]	Enzyme
Q2G1E0	Q2G1E0_C506	NQGTLIUYK	-0.151394	0.128293		0.00690837	0.00690837	SAOUHSC_00185	Uncharacterized sensor-like histidine kinase SAOUHSC_00185	no	ATP binding [GO:0005524]; phosphorelay sensor kinase activity [GO:0000155]	Receptor/Transporter/Channel	membrane/cell wall
Q2G1E1	Q2G1E1_C135	SLASUHDAFQPLLK	0.0773177	-0.0922625	0.14251	0.190804	0.109914	SAOUHSC_00184	Uncharacterized response regulatory protein SAOUHSC_00184	no	DNA binding transcription factor activity [GO:0003700]; sequence-specific DNA binding [GO:0043565]	Gene expression and Nucleic acid binding
Q2G1E1	Q2G1E1_C248	YLQMSPSDYUK	0.0434122	0.117045	0.372506	0.356369	0.236707	SAOUHSC_00184	Uncharacterized response regulatory protein SAOUHSC_00184	no	DNA binding transcription factor activity [GO:0003700]; sequence-specific DNA binding [GO:0043565]	Gene expression and Nucleic acid binding
Q2G1E1	Q2G1E1_C7	VVIUDDER	-0.313854	-0.124534	0.133037	-0.0315479	-0.0780412	SAOUHSC_00184	Uncharacterized response regulatory protein SAOUHSC_00184	no	DNA binding transcription factor activity [GO:0003700]; sequence-specific DNA binding [GO:0043565]	Gene expression and Nucleic acid binding
Q2G1E5	Q2G1E5_C311	NFVNAULGIEEIVVKPEEAR	-0.257873	-0.396194	-0.701623	-0.0659289	-0.327034	SAOUHSC_00180	Uncharacterized protein	no	oxidoreductase activity [GO:0016491]	Enzyme
Q2G1E5	Q2G1E5_C72	LVDAVVIUTPNK	-0.109141	-0.366727	0.0352016	0.228603	-0.0369696	SAOUHSC_00180	Uncharacterized protein	no	oxidoreductase activity [GO:0016491]	Enzyme
Q2G1E6	Q2G1E6_C34	VENVEMIAFUDVDISK	-0.561154	-0.196872	-0.0538081	-0.454348	-0.32561	SAOUHSC_00179	Uncharacterized protein	no	oxidoreductase activity [GO:0016491]	Enzyme
Q2G1E6	Q2G1E6_C96	HVMUEKPMAK	-0.281983	-0.256718	0.0610158		-0.256718	SAOUHSC_00179	Uncharacterized protein	no	oxidoreductase activity [GO:0016491]	Enzyme
Q2G1F0	Q2G1F0_C353	ITLAFDMNKUHFFDEK		0.545968		0.0173518	0.28166	SAOUHSC_00175	Multiple sugar-binding transport ATP-binding protein, putative	no	ATPase activity [GO:0016887]; ATP binding [GO:0005524]	not assigned	membrane/cell wall
Q2G1F0	Q2G1F0_C41	DFNLHITDKEFIVFVGPSGUGK	-0.229504	-0.143457	0.151287	-0.155735	-0.149596	SAOUHSC_00175	Multiple sugar-binding transport ATP-binding protein, putative	no	ATPase activity [GO:0016887]; ATP binding [GO:0005524]	not assigned	membrane/cell wall					Nucleotide binding			Functional site
Q2G1G0	Q2G1G0_C28	GLIGDUIQPIIEPIK	-0.434754	0.0192505	-0.073287	-0.314535	-0.193911	SAOUHSC_00164	Uncharacterized protein	no	0	not assigned
Q2G1G0	Q2G1G0_C49	NTLQYUGEK	-0.437311	0.210763	-0.0842879	-0.264374	-0.174331	SAOUHSC_00164	Uncharacterized protein	no	0	not assigned
Q2G1G2	Q2G1G2_C219	INTLQSFAESFMRPUQLAK	0.801407	0.860446	0.849038	0.715893	0.825223	SAOUHSC_00162	Type I restriction enzyme R Protein	no	ATP binding [GO:0005524]; DNA binding [GO:0003677]; Type I site-specific deoxyribonuclease activity [GO:0009035]	Gene expression and Nucleic acid binding
Q2G1G2	Q2G1G2_C372	VVFIIDEUHR	0.0501927	-0.111484	0.149135	0.16496	0.0996639	SAOUHSC_00162	Type I restriction enzyme R Protein	no	ATP binding [GO:0005524]; DNA binding [GO:0003677]; Type I site-specific deoxyribonuclease activity [GO:0009035]	Gene expression and Nucleic acid binding
Q2G1G4	Q2G1G4_C124	FVATNIMDAQIDAIUDVLK	0.187641	-0.416231	0.0803848	0.778713	0.134013	SAOUHSC_00160	Uncharacterized protein	no	carbohydrate derivative binding [GO:0097367]; DNA binding [GO:0003677]; DNA binding transcription factor activity [GO:0003700]	Gene expression and Nucleic acid binding
Q2G1G4	Q2G1G4_C269	FVALNYHAILDUITQSK	-0.05288	-0.0764629	-0.115129	0.118094	-0.0646714	SAOUHSC_00160	Uncharacterized protein	no	carbohydrate derivative binding [GO:0097367]; DNA binding [GO:0003677]; DNA binding transcription factor activity [GO:0003700]	Gene expression and Nucleic acid binding
Q2G1G5	Q2G1G5_C27	IIAAVGGMDNIDSVMNUMTR	-0.228368	-0.210413	-0.430528	-0.192596	-0.21939	SAOUHSC_00158	PTS system EIIBC component SAOUHSC_00158	no	kinase activity [GO:0016301]; protein-N(PI)-phosphohistidine-sugar phosphotransferase activity [GO:0008982]; protein-phosphocysteine-N-acetylmuramate phosphotransferase system transporter activity [GO:0090588]	Receptor/Transporter/Channel	membrane/cell wall		Active site						Functional site
Q2G1G5	Q2G1G5_C412	PFLTAUIGGGIGGAVIGGIGHIGAK	-0.575293	-0.0555913	-0.0301477	-0.710071	-0.315442	SAOUHSC_00158	PTS system EIIBC component SAOUHSC_00158	no	kinase activity [GO:0016301]; protein-N(PI)-phosphohistidine-sugar phosphotransferase activity [GO:0008982]; protein-phosphocysteine-N-acetylmuramate phosphotransferase system transporter activity [GO:0090588]	Receptor/Transporter/Channel	membrane/cell wall
Q2G1G6	Q2G1G6_C245	IIQEIUAITYDEAMALYQVSEHDVK	0.259785	-0.155422		0.224781	0.224781	murQ	N-acetylmuramic acid 6-phosphate etherase	no	carbohydrate derivative binding [GO:0097367]; carbon-oxygen lyase activity [GO:0016835]	Enzyme
Q2G1G6	Q2G1G6_C272	VATVMGMUGISK	-0.00247027	0.0958104	0.175045	0.568861	0.135428	murQ	N-acetylmuramic acid 6-phosphate etherase	no	carbohydrate derivative binding [GO:0097367]; carbon-oxygen lyase activity [GO:0016835]	Enzyme
Q2G1G7	Q2G1G7_C103	CULNASIISR	0.049352	0.305212	0.379732	0.0608775	0.183045	SAOUHSC_00156	Uncharacterized protein	no	catalytic activity [GO:0003824]	Enzyme
Q2G1G7	Q2G1G7_C224	QLIDFUK	-0.301497	-0.0278809	-0.166924	0.277985	-0.0974023	SAOUHSC_00156	Uncharacterized protein	no	catalytic activity [GO:0003824]	Enzyme
Q2G1G7	Q2G1G7_C269	QIUPHSIQPQFTTQR	-0.0279042	-0.044873	0.281431	0.183269	0.0776826	SAOUHSC_00156	Uncharacterized protein	no	catalytic activity [GO:0003824]	Enzyme
Q2G1G8	Q2G1G8_C447	HLDAUITR	-0.251281	-0.240964	-0.4495	0.066897	-0.246122	ptsG	PTS system glucose-specific EIICBA component	no	glucose transmembrane transporter activity [GO:0005355]; kinase activity [GO:0016301]; protein-N(PI)-phosphohistidine-sugar phosphotransferase activity [GO:0008982]	Receptor/Transporter/Channel	membrane/cell wall		Active site						Functional site
Q2G1H4	Q2G1H4_C147	LISNPGUFPTATLLALHPLISEK	-0.00731857	-0.192381			-0.0998499	argC	N-acetyl-gamma-glutamyl-phosphate reductase	no	N-acetyl-gamma-glutamyl-phosphate reductase activity [GO:0003942]; NAD binding [GO:0051287]; protein dimerization activity [GO:0046983]	Enzyme			Active site						Functional site
Q2G1I7	Q2G1I7_C135	TYVUEDMSK	-0.879356	0.041243			-0.419057	SAOUHSC_00135	Uncharacterized protein	no	0	not assigned
Q2G1I7	Q2G1I7_C143	CIULYNAPDEEAVRR		0.0370307		-0.629255	-0.296112	SAOUHSC_00135	Uncharacterized protein	no	0	not assigned
Q2G1J0	Q2G1J0_C290	SANIILDDANLDLAVEGIQLGILFNQGEVUSAGSR	1.59651	1.67125			1.63388	aldA	Putative aldehyde dehydrogenase AldA	no	aldehyde dehydrogenase (NAD) activity [GO:0004029]	Enzyme			Active site						Functional site
Q2G1J3	Q2G1J3_C358	IUEAIEYYFGLR	-0.57697	-0.0585804	0.208642	-0.536398	-0.297489	SAOUHSC_00129	UDP-N-acetylglucosamine 2-epimerase	no	UDP-N-acetylglucosamine 2-epimerase activity [GO:0008761]	Enzyme
Q2G1J4	Q2G1J4_C258	VNIHQPGPGVGGHULAVDPYFIIAK	0.126022	0.376451	0.383493	0.617208	0.379972	SAOUHSC_00128	Cap5O protein/UDP-N-acetyl-D-mannosaminuronic acid dehydrogenase	no	NAD binding [GO:0051287]; oxidoreductase activity, acting on the CH-CH group of donors, NAD or NADP as acceptor [GO:0016628]; oxidoreductase activity, acting on the CH-OH group of donors, NAD or NADP as acceptor [GO:0016616]	Enzyme
Q2G1J4	Q2G1J4_C92	SUDISLVMR	-0.379357	-0.252913	-0.250474	-0.131092	-0.251694	SAOUHSC_00128	Cap5O protein/UDP-N-acetyl-D-mannosaminuronic acid dehydrogenase	no	NAD binding [GO:0051287]; oxidoreductase activity, acting on the CH-CH group of donors, NAD or NADP as acceptor [GO:0016628]; oxidoreductase activity, acting on the CH-OH group of donors, NAD or NADP as acceptor [GO:0016616]	Enzyme
Q2G1J7	Q2G1J7_C260	LNKDQSQTLTILUGHGK	0.230326	-0.0934634	0.0511633	-0.377463	-0.0211501	SAOUHSC_00125	Cap5L protein/glycosyltransferase, putative	no	transferase activity [GO:0016740]	not assigned
Q2G1J7	Q2G1J7_C302	IADVUIASLIK	-0.169161	0.146916	-0.0132905	0.108357	0.0475333	SAOUHSC_00125	Cap5L protein/glycosyltransferase, putative	no	transferase activity [GO:0016740]	not assigned
Q2G1K0	Q2G1K0_C51	RLENLDUNYR	0.0863762	0.0836559	-0.128787	0.0378742	0.060765	SAOUHSC_00122	Capsular polysaccharide biosynthesis protein Cap5I, putative	no	0	not assigned
Q2G1K1	Q2G1K1_C73	YUSISSDVK	0.0102069	-0.0237977	0.0765591	-0.0180159	-0.00390446	SAOUHSC_00121	Capsular polysaccharide synthesis enzyme O-acetyl transferase Cap5H, putative	no	transferase activity [GO:0016740]	not assigned
Q2G1K2	Q2G1K2_C101	EQPDALLILGDTNSULAAVSAK	-0.00283046	0.11836	0.228234	0.423955	0.173297	SAOUHSC_00120	UDP-N-acetylglucosamine 2-epimerase	no	UDP-N-acetylglucosamine 2-epimerase activity [GO:0008761]	Enzyme
Q2G1K3	Q2G1K3_C138	WUKPNYNSVIATFCYK	-0.236622	0.225152	0.612683		0.225152	SAOUHSC_00119	Capsular polysaccharide synthesis enzyme Cap8F	no	catalytic activity [GO:0003824]; coenzyme binding [GO:0050662]	Enzyme
Q2G1K4	Q2G1K4_C160	SEQTLIUGTR	0.335712	0.826111			0.580912	SAOUHSC_00118	Capsular polysaccharide biosynthesis protein Cap5E, putative	no	UDP-glucose 4-epimerase activity [GO:0003978]	Enzyme
Q2G1K9	Q2G1K9_C120	GLTYVAEPIGVIUGVTPTTNPTSTTIFK	0.0304067	-0.0243111	0.00158609	0.0922074	0.0159964	SAOUHSC_00113	Aldehyde-alcohol dehydrogenase	no	acetaldehyde dehydrogenase (acetylating) activity [GO:0008774]; alcohol dehydrogenase (NAD) activity [GO:0004022]; metal ion binding [GO:0046872]	Enzyme
Q2G1K9	Q2G1K9_C370	QAFQIUEDTLHFGGLGHTAVIHTEDETLQK	0.387693	-0.0184731	0.658738	0.137297	0.262495	SAOUHSC_00113	Aldehyde-alcohol dehydrogenase	no	acetaldehyde dehydrogenase (acetylating) activity [GO:0008774]; alcohol dehydrogenase (NAD) activity [GO:0004022]; metal ion binding [GO:0046872]	Enzyme
Q2G1K9	Q2G1K9_C431	VLVNTPSAVGGIGDMYNELIPSLTLGUGSYGR	0.264356	0.284514	0.814017	0.307662	0.296088	SAOUHSC_00113	Aldehyde-alcohol dehydrogenase	no	acetaldehyde dehydrogenase (acetylating) activity [GO:0008774]; alcohol dehydrogenase (NAD) activity [GO:0004022]; metal ion binding [GO:0046872]	Enzyme
Q2G1K9	Q2G1K9_C493	VMIVUDPGMVEFGYTK	-0.179433	-0.0995408	-0.358805	-0.103302	-0.141367	SAOUHSC_00113	Aldehyde-alcohol dehydrogenase	no	acetaldehyde dehydrogenase (acetylating) activity [GO:0008774]; alcohol dehydrogenase (NAD) activity [GO:0004022]; metal ion binding [GO:0046872]	Enzyme
Q2G1K9	Q2G1K9_C602	IGMPENATFIUIPTTSGTGSEVTPFAVITDSETNVK		0.0246034	-0.0104395		0.00708193	SAOUHSC_00113	Aldehyde-alcohol dehydrogenase	no	acetaldehyde dehydrogenase (acetylating) activity [GO:0008774]; alcohol dehydrogenase (NAD) activity [GO:0004022]; metal ion binding [GO:0046872]	Enzyme
Q2G1K9	Q2G1K9_C844	MAELAFEDQUTTANPK	-0.330828	0.13711	-0.0154179	-0.138648	-0.077033	SAOUHSC_00113	Aldehyde-alcohol dehydrogenase	no	acetaldehyde dehydrogenase (acetylating) activity [GO:0008774]; alcohol dehydrogenase (NAD) activity [GO:0004022]; metal ion binding [GO:0046872]	Enzyme
Q2G1L5	Q2G1L5_C345	SDADVAUTALFDSASGFK	-0.058503	-0.11868	-0.0994017	0.0608775	-0.0789524	SAOUHSC_00107	Uncharacterized protein	no	hydrolase activity, acting on ester bonds [GO:0016788]; metal ion binding [GO:0046872]; nucleotide binding [GO:0000166]	Enzyme
Q2G1M1	Q2G1M1_C155	IINATSQAGVEGNPGLSLYUSTK	0.0302654	0.42417	0.172359	0.3421	0.25723	SAOUHSC_00086	3-ketoacyl-acyl carrier protein reductase, putative	no	3-oxoacyl-[acyl-carrier-protein] reductase (NADPH) activity [GO:0004316]; 3-oxo-glutaryl-[acp] methyl ester reductase activity [GO:0102131]; 3-oxo-pimeloyl-[acp] methyl ester reductase activity [GO:0102132]; acetoin dehydrogenase activity [GO:0019152]	Enzyme
Q2G1M2	Q2G1M2_C150	GNANQASHKDTUKK	0.0971627	0.0758869	0.383369	0.581618	0.240266	SAOUHSC_00085	Uncharacterized protein	no	0	not assigned	membrane/cell wall
Q2G1M9	Q2G1M9_C445	DLEGIULSR	-0.113629	-0.336173			-0.224901	SAOUHSC_00079	Uncharacterized protein	no	0	not assigned
Q2G1N2	Q2G1N2_C147	DLTIIGUGLIGDK	-0.238014	0.0952938	0.0726538	-0.0654129	0.00362045	SAOUHSC_00076	Ornithine cyclodeaminase, putative	no	ornithine cyclodeaminase activity [GO:0008473]; oxidoreductase activity, acting on the CH-NH2 group of donors, NAD or NADP as acceptor [GO:0016639]	Enzyme
Q2G1N2	Q2G1N2_C259	VVVDDWSQUNR	0.0316832	0.141314	0.386388	-0.114441	0.0864987	SAOUHSC_00076	Ornithine cyclodeaminase, putative	no	ornithine cyclodeaminase activity [GO:0008473]; oxidoreductase activity, acting on the CH-NH2 group of donors, NAD or NADP as acceptor [GO:0016639]	Enzyme
Q2G1N3	Q2G1N3_C8	SQAUHDSLLDSVGQTPMVQLHQLFPK	-0.488653	0.0439044		-0.636392	-0.488653	sbnA	Probable siderophore biosynthesis protein SbnA	no	cysteine synthase activity [GO:0004124]; pyridoxal phosphate binding [GO:0030170]	Enzyme
Q2G1N3	Q2G1N3_C95	LTUVVDPK	-0.343385	0.295135		-0.161637	-0.161637	sbnA	Probable siderophore biosynthesis protein SbnA	no	cysteine synthase activity [GO:0004124]; pyridoxal phosphate binding [GO:0030170]	Enzyme
Q2G1P4	Q2G1P4_C506	LNRGEUTTK	-0.0157534			0.142871	0.0635587	SAOUHSC_00060	Uncharacterized protein	no	sodium-dependent phosphate transmembrane transporter activity [GO:0015321]	Receptor/Transporter/Channel	membrane/cell wall
Q2G1Q4	Q2G1Q4_C1008	VYFVIGTDNTQDGAVNWSUEKPNLLNVAVTR	0.0565835	0.101112	-0.118633		0.0565835	SAOUHSC_00049	Uncharacterized protein	no	0	not assigned
Q2G1Q4	Q2G1Q4_C108	IQDIFDDYSEIHNPNGTHUYGYTFNTDKHGK	0.62938	-0.0460271	0.0828388	-0.513564	0.0184059	SAOUHSC_00049	Uncharacterized protein	no	0	not assigned
Q2G1Q4	Q2G1Q4_C505	NUESFSK	-0.287788	-0.0881902	0.090469	0.0612568	-0.0134667	SAOUHSC_00049	Uncharacterized protein	no	0	not assigned
Q2G1Q9	Q2G1Q9_C4	MITULFGSSR	0.154194	0.0593553			0.106775	SAOUHSC_00043	Uncharacterized protein	no	0	not assigned
Q2G1R3	Q2G1R3_C33	HVVSEAARPDVFFTEFTNTESFUHPEGIHSVR	-0.239362	-0.0466081	-0.133606	-0.302262	-0.186484	SAOUHSC_00039	tRNA-dihydrouridine synthase	no	flavin adenine dinucleotide binding [GO:0050660]; tRNA dihydrouridine synthase activity [GO:0017150]	Gene expression and Nucleic acid binding
Q2G1R3	Q2G1R3_C87	GIDLNMGUPVANVAK	0.161178	0.0861044	0.479334	0.0817487	0.123641	SAOUHSC_00039	tRNA-dihydrouridine synthase	no	flavin adenine dinucleotide binding [GO:0050660]; tRNA dihydrouridine synthase activity [GO:0017150]	Gene expression and Nucleic acid binding			Active site						Functional site
Q2G1R8	Q2G1R8_C60	LMGIIISENLIEUVK	-0.324726	-0.71085	-0.682951	-0.0524909	-0.503838	SAOUHSC_00034	Uncharacterized protein	no	DNA binding [GO:0003677]; metal ion binding [GO:0046872]	Gene expression and Nucleic acid binding
Q2G1S1	Q2G1S1_C33	VDMIAUEDTR	-0.265168	0.0406352	0.139745	-0.0572701	-0.00831748	rsmI	Ribosomal RNA small subunit methyltransferase I	no	rRNA (cytosine-2'-O-)-methyltransferase activity [GO:0070677]	Gene expression and Nucleic acid binding
Q2G1S1	Q2G1S1_C43	LUNHYDIPTPLK	-0.313854	-0.333662	0.373286	-0.999596	-0.323758	rsmI	Ribosomal RNA small subunit methyltransferase I	no	rRNA (cytosine-2'-O-)-methyltransferase activity [GO:0070677]	Gene expression and Nucleic acid binding
Q2G1S2	Q2G1S2_C242	GLSYEEVUEQTTK	0.517528	-0.915936	-0.324563		-0.324563	SAOUHSC_00462	Uncharacterized protein	no	deoxyribonuclease activity [GO:0004536]; endodeoxyribonuclease activity, producing 5'-phosphomonoesters [GO:0016888]	Gene expression and Nucleic acid binding
Q2G1S3	Q2G1S3_C179	GMFNETUPSFDDIFEEYYAAGQR	-0.283808	0.276199	-0.206978	-0.149233	-0.178105	purA	Adenylosuccinate synthetase	no	adenylosuccinate synthase activity [GO:0004019]; GTP binding [GO:0005525]; magnesium ion binding [GO:0000287]	Enzyme
Q2G1S3	Q2G1S3_C343	IUTAYELDGK	-0.266819	0.175301	0.108223	-0.209109	-0.0504427	purA	Adenylosuccinate synthetase	no	adenylosuccinate synthase activity [GO:0004019]; GTP binding [GO:0005525]; magnesium ion binding [GO:0000287]	Enzyme
Q2G1S3	Q2G1S3_C366	RUKPIFEELPGWTEDVTNVR						purA	Adenylosuccinate synthetase	no	adenylosuccinate synthase activity [GO:0004019]; GTP binding [GO:0005525]; magnesium ion binding [GO:0000287]	Enzyme
Q2G1S3	Q2G1S3_C404	ISELUNVQISIFSVGPDR	-0.337028	0.143902	-0.512119	-0.366201	-0.351615	purA	Adenylosuccinate synthetase	no	adenylosuccinate synthase activity [GO:0004019]; GTP binding [GO:0005525]; magnesium ion binding [GO:0000287]	Enzyme
Q2G1S4	Q2G1S4_C254	MIUSSGNVDSNR	-0.110417	0.0399806	0.185105	0.215119	0.112543	SAOUHSC_00018	Replicative DNA helicase	yes	ATP binding [GO:0005524]; DNA binding [GO:0003677]; DNA helicase activity [GO:0003678]	Gene expression and Nucleic acid binding
Q2G1S4	Q2G1S4_C357	ELKUPVIALSQLSR	0.240742	0.33674	0.401849	0.555129	0.369295	SAOUHSC_00018	Replicative DNA helicase	yes	ATP binding [GO:0005524]; DNA binding [GO:0003677]; DNA helicase activity [GO:0003678]	Gene expression and Nucleic acid binding
Q2G1T1	Q2G1T1_C164	HNIGNUNILK	-0.240323	-0.0325657	-0.0826433	-0.108095	-0.0953693	SAOUHSC_00827	Uncharacterized protein	no	0	not assigned
Q2G1T3	Q2G1T3_C120	YLQMAHEFUPYSK	-2.82951		-2.94308		-2.8863	SAOUHSC_00831	Organic hydroperoxide resistance protein-like	no	0	not assigned
Q2G1T4	Q2G1T4_C57	CIVFGUYENETLIATAALEQIR	-0.16741	-0.368626	0.0462815	-0.196393	-0.181901	SAOUHSC_00830	Uncharacterized protein	no	0	not assigned
Q2G1U0	Q2G1U0_C182	IQUIVEAEHLK	-0.233364	-0.343862	-0.747052	-0.340897	-0.34238	gmk	Guanylate kinase	yes	ATP binding [GO:0005524]; guanylate kinase activity [GO:0004385]	Enzyme
Q2G1U3	Q2G1U3_C425	FQPSNSSDYTIFVAEVASTUNEALLSDYMDK	-0.0957741	0.0302654	0.0152121		0.0152121	SAOUHSC_00937	Oligoendopeptidase F	no	metal ion binding [GO:0046872]; metalloendopeptidase activity [GO:0004222]	Enzyme
Q2G1U3	Q2G1U3_C586	NAGVDMTTPEPIEQAUEVFEQK	-0.24035	-0.19446	-0.122853	-0.0467869	-0.158656	SAOUHSC_00937	Oligoendopeptidase F	no	metal ion binding [GO:0046872]; metalloendopeptidase activity [GO:0004222]	Enzyme
Q2G1W0	Q2G1W0_C168	SULNDCYDK	0.0690147	0.227864	0.245861	-0.0461743	0.148439	SAOUHSC_02574	Uncharacterized protein	no	coenzyme binding [GO:0050662]; oxidoreductase activity [GO:0016491]	Enzyme
Q2G1W0	Q2G1W0_C172	SCLNDUYDK	-0.16403	-0.0201256	0.177047	-0.265431	-0.0920779	SAOUHSC_02574	Uncharacterized protein	no	coenzyme binding [GO:0050662]; oxidoreductase activity [GO:0016491]	Enzyme
Q2G1W0	Q2G1W0_C30	GHDVKLYUR	-0.15465	0.418676	-0.259703	-0.067712	-0.111181	SAOUHSC_02574	Uncharacterized protein	no	coenzyme binding [GO:0050662]; oxidoreductase activity [GO:0016491]	Enzyme
Q2G1W2	Q2G1W2_C221	GIFSVMNYLLPMQDIMSMHUSANVGEK	0.0454701	-0.0534698	0.12263	-0.0285763	0.00844694	pckA	Phosphoenolpyruvate carboxykinase (ATP)	no	ATP binding [GO:0005524]; metal ion binding [GO:0046872]; phosphoenolpyruvate carboxykinase (ATP) activity [GO:0004612]	Enzyme				Binding site				Metall binding	Functional site
Q2G1W2	Q2G1W2_C273	NGVFNIEGGUYAK	-0.254066	-0.208861	-0.212986	-0.0384952	-0.210923	pckA	Phosphoenolpyruvate carboxykinase (ATP)	no	ATP binding [GO:0005524]; metal ion binding [GO:0046872]; phosphoenolpyruvate carboxykinase (ATP) activity [GO:0004612]	Enzyme
Q2G1W4	Q2G1W4_C275	HGGGUFSGK	0.0952223	0.144132	0.280242	0.25768	0.200906	metK	S-adenosylmethionine synthase	yes	ATP binding [GO:0005524]; metal ion binding [GO:0046872]; methionine adenosyltransferase activity [GO:0004478]	Enzyme				Binding site					Functional site
Q2G1W4	Q2G1W4_C308	NIVAAGLADQUEVQLAYAIGVAEPVSIAIDTFGTGK	-0.259409	-0.0169061	-0.0314595	0.347552	-0.0241828	metK	S-adenosylmethionine synthase	yes	ATP binding [GO:0005524]; metal ion binding [GO:0046872]; methionine adenosyltransferase activity [GO:0004478]	Enzyme
Q2G1W4	Q2G1W4_C44	VAUETTVTTGMALIAGEISTTTYVDIPK	-0.264842	-0.0311204	0.041243	0.0282862	-0.00141706	metK	S-adenosylmethionine synthase	yes	ATP binding [GO:0005524]; metal ion binding [GO:0046872]; methionine adenosyltransferase activity [GO:0004478]	Enzyme								Metall binding	Functional site
Q2G1X6	Q2G1X6_C136	HIITGVCETDFSGYPDUR	-0.062053	0.0989585	0.321813	0.221197	0.160078	queC	7-cyano-7-deazaguanine synthase	no	ATP binding [GO:0005524]; ligase activity [GO:0016874]; metal ion binding [GO:0046872]	not assigned
Q2G1X6	Q2G1X6_C23	AIVVFSGGQDSTTULFYAK	0.175301	0.117961	1.06115	0.229465	0.202383	queC	7-cyano-7-deazaguanine synthase	no	ATP binding [GO:0005524]; ligase activity [GO:0016874]; metal ion binding [GO:0046872]	not assigned						Nucleotide binding			Functional site
Q2G1X7	Q2G1X7_C33	TAGUDYR	0.210763	0.443394	0.581303	0.281194	0.362294	queE	7-carboxy-7-deazaguanine synthase	no	4 iron, 4 sulfur cluster binding [GO:0051539]; carbon-nitrogen lyase activity [GO:0016840]; magnesium ion binding [GO:0000287]; S-adenosyl-L-methionine binding [GO:1904047]	Enzyme				Binding site				Metall binding	Functional site
Q2G1Y0	Q2G1Y0_C109	IREQIGNVEYMUELK	-0.308122	-0.25511	0.139993	-0.170832	-0.212971	ligA	DNA ligase	yes	DNA binding [GO:0003677]; DNA ligase (NAD+) activity [GO:0003911]; metal ion binding [GO:0046872]	Gene expression and Nucleic acid binding			Active site	Binding site					Functional site
Q2G1Y0	Q2G1Y0_C401	RPEDAVTYHMPTHUPSCGHELVR	-0.931783	-0.68959	-0.662277	-0.711275	-0.700433	ligA	DNA ligase	yes	DNA binding [GO:0003677]; DNA ligase (NAD+) activity [GO:0003911]; metal ion binding [GO:0046872]	Gene expression and Nucleic acid binding								Metall binding	Functional site
Q2G1Y0	Q2G1Y0_C404	RPEDAVTYHMPTHCPSUGHELVR	-0.740529	-0.505431	-0.753677	-1.1465	-0.747103	ligA	DNA ligase	yes	DNA binding [GO:0003677]; DNA ligase (NAD+) activity [GO:0003911]; metal ion binding [GO:0046872]	Gene expression and Nucleic acid binding								Metall binding	Functional site
Q2G1Y1	Q2G1Y1_C27	EEUYQFFDDLCTVNEIQSLSQR	0.0583858		-0.0597656		-0.000689905	SAOUHSC_02125	Uncharacterized protein	no	DNA binding transcription factor activity [GO:0003700]; sequence-specific DNA binding [GO:0043565]	Gene expression and Nucleic acid binding
Q2G1Y1	Q2G1Y1_C35	EECYQFFDDLUTVNEIQSLSQR		-0.0160743	0.0479571	-0.361787	-0.0160743	SAOUHSC_02125	Uncharacterized protein	no	DNA binding transcription factor activity [GO:0003700]; sequence-specific DNA binding [GO:0043565]	Gene expression and Nucleic acid binding
Q2G1Y5	Q2G1Y5_C71	AGEYEDUK	-0.755669	0.143874	-0.301336	-0.441106	-0.371221	ldh2	L-lactate dehydrogenase 2	no	L-lactate dehydrogenase activity [GO:0004459]	Enzyme				Binding site					Functional site
Q2G1Y6	Q2G1Y6_C400	EIDGVMUEPFER	-0.197848	0.0515809	0.0415234	-0.0710726	-0.0147746	SAOUHSC_01058	GTP-binding protein TypA, putative	no	GTPase activity [GO:0003924]; GTP binding [GO:0005525]	not assigned
Q2G1Y6	Q2G1Y6_C408	VQUEVPQENAGAVIESLGAR	-0.213571	-0.0191558	-0.0356088	-0.11516	-0.0753843	SAOUHSC_01058	GTP-binding protein TypA, putative	no	GTPase activity [GO:0003924]; GTP binding [GO:0005525]	not assigned
Q2G1Y9	Q2G1Y9_C38	TFMCDDUK	-0.376077	-0.380465	-0.0498601	-0.144999	-0.260538	SAOUHSC_01060	Uncharacterized protein	no	0	not assigned
Q2G1Y9	Q2G1Y9_C6	QVQUIICDAK	-0.333352	0.00446544	0.0464212	-0.0568663	-0.0262004	SAOUHSC_01060	Uncharacterized protein	no	0	not assigned
Q2G1Y9	Q2G1Y9_C9	QVQCIIUDAK	0.0409625	-0.246926	0.233152	0.0672257	0.0540941	SAOUHSC_01060	Uncharacterized protein	no	0	not assigned
Q2G1Z3	Q2G1Z3_C191	LNQEQGUTIVMVLHDINQAIR	0.1149	0.251325	0.442545		0.251325	SAOUHSC_00652	Iron compound ABC transporter, ATP-binding protein	no	ATPase activity [GO:0016887]; ATP binding [GO:0005524]	not assigned
Q2G1Z3	Q2G1Z3_C260	TGKPLLVTYDLUR	0.254409	0.426493	0.648834	0.53067	0.478581	SAOUHSC_00652	Iron compound ABC transporter, ATP-binding protein	no	ATPase activity [GO:0016887]; ATP binding [GO:0005524]	not assigned
Q2G1Z3	Q2G1Z3_C40	VTSIIGPNGUGK	0.391548	0.265557	0.648926	0.533663	0.462605	SAOUHSC_00652	Iron compound ABC transporter, ATP-binding protein	no	ATPase activity [GO:0016887]; ATP binding [GO:0005524]	not assigned						Nucleotide binding			Functional site
Q2G1Z4	Q2G1Z4_C439	AQSLIMGUYGIGISR	-0.191524	0.0356239	-0.135919	-0.0863542	-0.111137	proS	Proline--tRNA ligase	yes	aminoacyl-tRNA editing activity [GO:0002161]; ATP binding [GO:0005524]; proline-tRNA ligase activity [GO:0004827]	Gene expression and Nucleic acid binding
Q2G1Z5	Q2G1Z5_C84	KUDFKDDLFIEGITAYDNER	-0.278601	-0.0983511	-0.211181	-0.194295	-0.202738	SAOUHSC_01239	Zinc metalloprotease	no	metal ion binding [GO:0046872]; metalloendopeptidase activity [GO:0004222]	Enzyme	membrane/cell wall
Q2G1Z8	Q2G1Z8_C1030	GUTGVKR	0.270589	0.348346	0.323312		0.323312	polC	DNA polymerase III PolC-type	yes	3'-5' exonuclease activity [GO:0008408]; DNA binding [GO:0003677]; DNA-directed DNA polymerase activity [GO:0003887]	Gene expression and Nucleic acid binding
Q2G1Z8	Q2G1Z8_C97	YFGHUIDQTALSPK	0.00662118	-0.00595618	-0.0113262		-0.00595618	polC	DNA polymerase III PolC-type	yes	3'-5' exonuclease activity [GO:0008408]; DNA binding [GO:0003677]; DNA-directed DNA polymerase activity [GO:0003887]	Gene expression and Nucleic acid binding
Q2G1Z9	Q2G1Z9_C154	FRGDGLUVSTPSGSTAYNK	-0.198014	0.319965	-0.0922325	0.00201836	-0.0451071	nadK	NAD kinase	yes	ATP binding [GO:0005524]; NAD+ kinase activity [GO:0003951]	Enzyme				Binding site					Functional site
Q2G200	Q2G200_C17	IKDDILYUYTEDSIK	-0.331808	-0.153623	-0.183425	-0.0728469	-0.168524	SAOUHSC_00941	UPF0738 protein SAOUHSC_00941	no	0	not assigned
Q2G218	Q2G218_C72	AGEYSDUHDADLVVICAGAAQKPGETR	0.0223323	-0.17718	-0.0750598	-0.128878	-0.101969	ldh1	L-lactate dehydrogenase 1	no	L-lactate dehydrogenase activity [GO:0004459]	Enzyme				Binding site					Functional site
Q2G218	Q2G218_C81	AGEYSDCHDADLVVIUAGAAQK	-0.0298237	-0.242413	-0.0688113	-0.115379	-0.0920949	ldh1	L-lactate dehydrogenase 1	no	L-lactate dehydrogenase activity [GO:0004459]	Enzyme				Binding site		Nucleotide binding			Functional site
Q2G220	Q2G220_C174	SUDIESVESWK	-0.272332	-0.0734236	0.337768	-0.423352	-0.172878	SAOUHSC_02980	Uncharacterized protein	no	isochorismatase activity [GO:0008908]	Enzyme
Q2G223	Q2G223_C112	TEUWYILDAAPGAEIIYGVHAHNK	-1.02538	0.118891	-0.0860326		-0.0860326	SAOUHSC_02976	Mannose-6-phosphate isomerase, class I	no	mannose-6-phosphate isomerase activity [GO:0004476]; zinc ion binding [GO:0008270]	Enzyme								Metall binding	Functional site
Q2G224	Q2G224_C37	SVUVNPTHVK	-0.340916	-0.244292	-0.292652	-0.21215	-0.268472	deoC	Deoxyribose-phosphate aldolase	no	deoxyribose-phosphate aldolase activity [GO:0004139]	Enzyme
Q2G224	Q2G224_C58	LADSEVLVUTVIGFPLGASTTATK	-0.371945	-0.25044	-0.261569	-0.109343	-0.256005	deoC	Deoxyribose-phosphate aldolase	no	deoxyribose-phosphate aldolase activity [GO:0004139]	Enzyme
Q2G227	Q2G227_C177	TGDLIVYTSADPVLQIAAHEDIIPLEELYDIUEK	-0.0203551	-0.0175339	-0.105411	-0.0501289	-0.035242	deoB	Phosphopentomutase	no	magnesium ion binding [GO:0000287]; phosphopentomutase activity [GO:0008973]	Enzyme
Q2G229	Q2G229_C46	AGNTTFLUGVNDDRVDEILSVINQTCGNR	-0.462416	-0.123921	-0.0145433	-0.12688	-0.1254	SAOUHSC_00452	Uncharacterized protein	no	0	not assigned
Q2G229	Q2G229_C64	AGNTTFLCGVNDDRVDEILSVINQTUGNR	-0.238698	-0.242977	-0.23914	0.0309716	-0.238919	SAOUHSC_00452	Uncharacterized protein	no	0	not assigned
Q2G230	Q2G230_C90	VVLUDRYIDSSLAYQGYAR						tmk	Thymidylate kinase	yes	ATP binding [GO:0005524]; thymidylate kinase activity [GO:0004798]; uridylate kinase activity [GO:0009041]	Enzyme
Q2G232	Q2G232_C278	AQLIEULEK	-0.294243	-0.133543	-0.312724		-0.294243	SAOUHSC_00450	Orn/Lys/Arg decarboxylase, putative	no	catalytic activity [GO:0003824]	Enzyme
Q2G232	Q2G232_C384	RFEYVTWUDLKK	0.0137838	-0.198742	-0.147058	0.137504	-0.0666373	SAOUHSC_00450	Orn/Lys/Arg decarboxylase, putative	no	catalytic activity [GO:0003824]	Enzyme
Q2G233	Q2G233_C17	GTFSYLAUR	-0.345381	0.00317044	-0.389999	-0.105256	-0.225319	SAOUHSC_02135	Uncharacterized protein	no	prephenate dehydratase activity [GO:0004664]	Enzyme
Q2G234	Q2G234_C131	YAGYDNUGDPAEK	-0.14156	-0.156428			-0.148994	SAOUHSC_02134	Nitric oxide synthase oxygenase	no	heme binding [GO:0020037]; metal ion binding [GO:0046872]; nitric-oxide synthase activity [GO:0004517]	Enzyme
Q2G234	Q2G234_C17	EUHYETQIINKR	-0.239362	-0.248365			-0.243863	SAOUHSC_02134	Nitric oxide synthase oxygenase	no	heme binding [GO:0020037]; metal ion binding [GO:0046872]; nitric-oxide synthase activity [GO:0004517]	Enzyme
Q2G234	Q2G234_C354	ESNANQUPFHH	0.347099	0.552967	0.829525	0.754973	0.65397	SAOUHSC_02134	Nitric oxide synthase oxygenase	no	heme binding [GO:0020037]; metal ion binding [GO:0046872]; nitric-oxide synthase activity [GO:0004517]	Enzyme
Q2G235	Q2G235_C217	NUVFLVDTFHTLK	-0.257713	-0.382462	-0.115472	-0.283816	-0.270764	SAOUHSC_02133	Nicotinate phosphoribosyltransferase	yes	nicotinate-nucleotide diphosphorylase (carboxylating) activity [GO:0004514]; nicotinate phosphoribosyltransferase activity [GO:0004516]	Enzyme
Q2G235	Q2G235_C457	AUWDNKHK	-0.316658	-0.197976	0.0388807	-0.0256077	-0.111792	SAOUHSC_02133	Nicotinate phosphoribosyltransferase	yes	nicotinate-nucleotide diphosphorylase (carboxylating) activity [GO:0004514]; nicotinate phosphoribosyltransferase activity [GO:0004516]	Enzyme
Q2G235	Q2G235_C97	SMQEGELUFGNEPLLR	-0.16856	-0.0671224	-0.278951	-0.0623844	-0.117841	SAOUHSC_02133	Nicotinate phosphoribosyltransferase	yes	nicotinate-nucleotide diphosphorylase (carboxylating) activity [GO:0004514]; nicotinate phosphoribosyltransferase activity [GO:0004516]	Enzyme
Q2G236	Q2G236_C75	EEGIDUTFIAVK	-0.266455	0.293787	-0.184309	-0.305532	-0.225382	nadE	NH(3)-dependent NAD(+) synthetase	yes	ATP binding [GO:0005524]; metal ion binding [GO:0046872]; NAD+ synthase (glutamine-hydrolyzing) activity [GO:0003952]; NAD+ synthase activity [GO:0008795]	Enzyme
Q2G238	Q2G238_C275	AFQQAVAUGTATAFDEDLATR	-0.440342	-0.25915	-0.287712	-0.153286	-0.273431	SAOUHSC_00707	Tagatose-6-phosphate kinase	no	1-phosphofructokinase activity [GO:0008662]; ATP binding [GO:0005524]; carbohydrate kinase activity [GO:0019200]; tagatose-6-phosphate kinase activity [GO:0009024]	Enzyme
Q2G239	Q2G239_C187	QSNEPYVLAVTAUPTGIAHTYMAR	-0.17454	-0.179466	-0.159106	-0.112849	-0.166823	SAOUHSC_00708	Fructose specific permease, putative	no	carbohydrate:proton symporter activity [GO:0005351]; protein-N(PI)-phosphohistidine-fructose phosphotransferase system transporter activity [GO:0022877]; protein-phosphocysteine-sugar phosphotransferase activity [GO:0090563]	Receptor/Transporter/Channel	membrane/cell wall
Q2G240	Q2G240_C33	TGUSASTIR		-0.167669	0.230572		0.0314515	SAOUHSC_00706	Uncharacterized protein	no	DNA binding [GO:0003677]; DNA binding transcription factor activity [GO:0003700]	Gene expression and Nucleic acid binding					DNA binding				Functional site
Q2G240	Q2G240_C97	IAANQINDNEULFIDAGSSTLELIK	0.364797	-0.117975	0.253868	0.0875986	0.170733	SAOUHSC_00706	Uncharacterized protein	no	DNA binding [GO:0003677]; DNA binding transcription factor activity [GO:0003700]	Gene expression and Nucleic acid binding
Q2G241	Q2G241_C108	AYKUYMTEEELEAER	0.00374614	0.0720858	-0.067198	-0.154634	-0.0317259	gltX	Glutamate--tRNA ligase	yes	ATP binding [GO:0005524]; glutamate-tRNA ligase activity [GO:0004818]; tRNA binding [GO:0000049]; zinc ion binding [GO:0008270]	Gene expression and Nucleic acid binding
Q2G242	Q2G242_C260	VUHVHGIK	-0.388642	-0.156164	-0.0560092	0.0469826	-0.106087	SAOUHSC_00508	Uncharacterized protein	no	0	not assigned	membrane/cell wall
Q2G243	Q2G243_C378	AVDGLDUYIGEVGLTGEVR	-0.340514	0.0170426	-0.160697	-0.0413577	-0.101028	radA	DNA repair protein RadA	no	ATP binding [GO:0005524]; damaged DNA binding [GO:0003684]; DNA-dependent ATPase activity [GO:0008094]; metal ion binding [GO:0046872]	Gene expression and Nucleic acid binding
Q2G243	Q2G243_C99	STLLLQIUASLSQK	0.178237	-0.569543	-0.26498	0.0166389	-0.124171	radA	DNA repair protein RadA	no	ATP binding [GO:0005524]; damaged DNA binding [GO:0003684]; DNA-dependent ATPase activity [GO:0008094]; metal ion binding [GO:0046872]	Gene expression and Nucleic acid binding
Q2G248	Q2G248_C126	SFVFGPUSVESFEQVEAVAK	-0.173661	-0.0274397	-0.325449	-0.373907	-0.249555	SAOUHSC_01852	Uncharacterized protein	no	aldehyde-lyase activity [GO:0016832]; transferase activity [GO:0016740]	Enzyme
Q2G255	Q2G255_C322	HGETGFVVDVGDUDSASDYAIR	-0.36589	-0.120451	-0.112522	0.0211954	-0.116486	SAOUHSC_01475	Uncharacterized protein	no	transferase activity, transferring glycosyl groups [GO:0016757]	Enzyme
Q2G255	Q2G255_C7	IGITUYPSMGGSGIIATELGIK		0.10017	0.229957		0.165064	SAOUHSC_01475	Uncharacterized protein	no	transferase activity, transferring glycosyl groups [GO:0016757]	Enzyme
Q2G255	Q2G255_C99	EYDLDLLHMHYAVPHAIUGILAR	-0.212016	0.0309716	0.480886	-0.691243	-0.0905222	SAOUHSC_01475	Uncharacterized protein	no	transferase activity, transferring glycosyl groups [GO:0016757]	Enzyme
Q2G258	Q2G258_C48	VIDQLKLEGUK	-0.431453	-0.15166	-0.120718	-0.495044	-0.291557	birA	Bifunctional ligase/repressor BirA	yes	ATP binding [GO:0005524]; biotin-[acetyl-CoA-carboxylase] ligase activity [GO:0004077]; DNA binding [GO:0003677]	Enzyme
Q2G263	Q2G263_C42	YPSGHALPTEKELUAR	-0.158059	-0.21753		0.218515	-0.158059	SAOUHSC_00096	Transcriptional regulator, GntR family, putative	no	DNA binding [GO:0003677]; DNA binding transcription factor activity [GO:0003700]	Gene expression and Nucleic acid binding					DNA binding				Functional site
Q2G266	Q2G266_C418	SEYHHUPVILGSATPCLESYAR						priA	Primosomal protein N'	yes	ATP binding [GO:0005524]; ATP-dependent 3'-5' DNA helicase activity [GO:0043140]; DNA binding [GO:0003677]; zinc ion binding [GO:0008270]	Gene expression and Nucleic acid binding
Q2G266	Q2G266_C428	SEYHHCPVILGSATPULESYAR						priA	Primosomal protein N'	yes	ATP binding [GO:0005524]; ATP-dependent 3'-5' DNA helicase activity [GO:0043140]; DNA binding [GO:0003677]; zinc ion binding [GO:0008270]	Gene expression and Nucleic acid binding
Q2G268	Q2G268_C154	EDGYHFIEPGSGFLAUGYVAK	0.22786	0.325926	0.496481	0.244618	0.285272	SAOUHSC_01178	Coenzyme A biosynthesis bifunctional protein CoaBC	yes	FMN binding [GO:0010181]; phosphopantothenate--cysteine ligase activity [GO:0004632]; phosphopantothenoylcysteine decarboxylase activity [GO:0004633]	Enzyme
Q2G273	Q2G273_C69	IIGVETGGUPHTAIR	-0.123439	-0.262686	-0.135588	0.0765115	-0.129514	ureG	Urease accessory protein UreG	no	GTPase activity [GO:0003924]; GTP binding [GO:0005525]; nickel cation binding [GO:0016151]	not assigned
Q2G274	Q2G274_C421	LADUSSK	0.0159362	0.0471973	0.0469851	0.0798374	0.0470912	gyrB	DNA gyrase subunit B	yes	ATP binding [GO:0005524]; DNA binding [GO:0003677]; DNA topoisomerase type II (ATP-hydrolyzing) activity [GO:0003918]; metal ion binding [GO:0046872]	Gene expression and Nucleic acid binding
Q2G274	Q2G274_C429	SPEEUEIFLVEGDSAGGSTK	-0.179727	0.00345832	0.0494914	0.210139	0.0264748	gyrB	DNA gyrase subunit B	yes	ATP binding [GO:0005524]; DNA binding [GO:0003677]; DNA topoisomerase type II (ATP-hydrolyzing) activity [GO:0003918]; metal ion binding [GO:0046872]	Gene expression and Nucleic acid binding
Q2G280	Q2G280_C44	DNTPTUTTEACDFR	-0.462734	0.121004	0.432617	-0.325035	-0.102016	SAOUHSC_01999	Uncharacterized protein	no	antioxidant activity [GO:0016209]; oxidoreductase activity [GO:0016491]	Enzyme			Active site						Functional site
Q2G280	Q2G280_C49	DNTPTCTTEAUDFRDNLEMFNDLDVAVYGISGDSK	-0.175957	0.291957	0.129481		0.129481	SAOUHSC_01999	Uncharacterized protein	no	antioxidant activity [GO:0016209]; oxidoreductase activity [GO:0016491]	Enzyme			Active site						Functional site
Q2G282	Q2G282_C102	FDFNTHNHYHIIUEQCGK	-0.222397	-0.137664	-0.132262	-0.737663	-0.18003	perR	Peroxide-responsive repressor PerR	no	DNA binding [GO:0003677]; DNA binding transcription factor activity [GO:0003700]; metal ion binding [GO:0046872]	Gene expression and Nucleic acid binding								Metall binding	Functional site
Q2G282	Q2G282_C105	FDFNTHNHYHIICEQUGK	-0.298336	-0.129876		-0.0394735	-0.129876	perR	Peroxide-responsive repressor PerR	no	DNA binding [GO:0003677]; DNA binding transcription factor activity [GO:0003700]; metal ion binding [GO:0046872]	Gene expression and Nucleic acid binding								Metall binding	Functional site
Q2G282	Q2G282_C142	MEIYGVUK	-0.0200482	0.0986613	0.303342	0.119688	0.109175	perR	Peroxide-responsive repressor PerR	no	DNA binding [GO:0003677]; DNA binding transcription factor activity [GO:0003700]; metal ion binding [GO:0046872]	Gene expression and Nucleic acid binding								Metall binding	Functional site
Q2G282	Q2G282_C145	MEIYGVCKEUQDK	0.052555	0.185486	0.413161	0.0554733	0.12048	perR	Peroxide-responsive repressor PerR	no	DNA binding [GO:0003677]; DNA binding transcription factor activity [GO:0003700]; metal ion binding [GO:0046872]	Gene expression and Nucleic acid binding								Metall binding	Functional site
Q2G286	Q2G286_C84	IASUKYHY	-0.521473	-0.469769	0.0224743	-0.139156	-0.304463	SAOUHSC_02691	Uncharacterized protein	no	endonuclease activity [GO:0004519]	Gene expression and Nucleic acid binding
Q2G292	Q2G292_C129	VLNGUHLGGGLHHAQPGR	0.213627	0.241962	0.647637	0.590243	0.416102	SAOUHSC_01849	Uncharacterized protein	no	0	not assigned
Q2G292	Q2G292_C147	ASGFUIYNDIAITAQYLAK	0.351402	0.398898	0.408277		0.398898	SAOUHSC_01849	Uncharacterized protein	no	0	not assigned
Q2G292	Q2G292_C238	GEDIGYGHTVNVPLEPYTEDASFLEUFK	-0.162073	0.0399806	0.163756	0.0257376	0.0328591	SAOUHSC_01849	Uncharacterized protein	no	0	not assigned
Q2G292	Q2G292_C274	DPLTHLNUTLHSLYEIPYFVK						SAOUHSC_01849	Uncharacterized protein	no	0	not assigned
Q2G293	Q2G293_C182	LMATGGLEIFATDDPEITSHPANULMAR	0.0483757	0.0132121	0.159629	0.1153	0.0818377	SAOUHSC_01847	Uncharacterized protein	no	acetoin dehydrogenase activity [GO:0019152]	Enzyme
Q2G294	Q2G294_C48	MNMAYEUIDR	-0.173761	-0.264207	-0.317838	-0.227015	-0.245611	SAOUHSC_01846	Acetyl-CoA synthetase, putative	no	catalytic activity [GO:0003824]	Enzyme
Q2G295	Q2G295_C216	NGLQLGDTLNUSGAESYK	-0.246059	0.0156723	-0.035926	0.0402687	-0.0101268	SAOUHSC_01850	Catabolite control protein A	no	DNA binding [GO:0003677]	Gene expression and Nucleic acid binding
Q2G295	Q2G295_C242	GNLPDAILUISDEEAIGIMHSAMDAGIK	-0.344435	-0.235684	-0.632722	-0.270058	-0.307246	SAOUHSC_01850	Catabolite control protein A	no	DNA binding [GO:0003677]	Gene expression and Nucleic acid binding
Q2G296	Q2G296_C207	EDGFNITVASEIMAILULSR	-0.0372986	0.0919759	0.0794883	-0.00285988	0.0383142	fhs	Formate--tetrahydrofolate ligase	no	ATP binding [GO:0005524]; formate-tetrahydrofolate ligase activity [GO:0004329]; methenyltetrahydrofolate cyclohydrolase activity [GO:0004477]; methylenetetrahydrofolate dehydrogenase (NADP+) activity [GO:0004488]	Enzyme
Q2G296	Q2G296_C484	ENGWDNYPVUMAK	-0.120408	-0.160545	-0.0660925	-0.061722	-0.0932501	fhs	Formate--tetrahydrofolate ligase	no	ATP binding [GO:0005524]; formate-tetrahydrofolate ligase activity [GO:0004329]; methenyltetrahydrofolate cyclohydrolase activity [GO:0004477]; methylenetetrahydrofolate dehydrogenase (NADP+) activity [GO:0004488]	Enzyme
Q2G297	Q2G297_C180	TIDULNYYNYSDER	-0.16259	-0.293447	-0.15266	0.11023	-0.157625	SAOUHSC_01696	Uncharacterized protein	no	0	not assigned
Q2G297	Q2G297_C53	VELAGVLHDFUKYDDLGK	-0.226729	-0.130365	-0.0226981	-0.127841	-0.129103	SAOUHSC_01696	Uncharacterized protein	no	0	not assigned
Q2G2A1	Q2G2A1_C43	IIAGGYNGSVAGEVHUIDEGCLIEDGHCIR	-0.434929		0.436908	0.255682	0.255682	SAOUHSC_01692	Uncharacterized protein	no	dCMP deaminase activity [GO:0004132]; zinc ion binding [GO:0008270]	Enzyme
Q2G2A1	Q2G2A1_C48	IIAGGYNGSVAGEVHCIDEGULIEDGHCIR	-0.0753528	0.0533894	1.28836	0.344942	0.199166	SAOUHSC_01692	Uncharacterized protein	no	dCMP deaminase activity [GO:0004132]; zinc ion binding [GO:0008270]	Enzyme
Q2G2A1	Q2G2A1_C69	TIHAEMNALLQUAK	-0.383962	-0.239839	0.0571383	-0.0133051	-0.126572	SAOUHSC_01692	Uncharacterized protein	no	dCMP deaminase activity [GO:0004132]; zinc ion binding [GO:0008270]	Enzyme
Q2G2A1	Q2G2A1_C88	QGVSTEGATIYVTHFPULNCTK	-0.204732	-0.354649	0.363003	0.0209111	-0.0919104	SAOUHSC_01692	Uncharacterized protein	no	dCMP deaminase activity [GO:0004132]; zinc ion binding [GO:0008270]	Enzyme								Metall binding	Functional site
Q2G2A1	Q2G2A1_C91	QGVSTEGATIYVTHFPCLNUTK	-0.152628	-0.259962	0.207393		-0.152628	SAOUHSC_01692	Uncharacterized protein	no	dCMP deaminase activity [GO:0004132]; zinc ion binding [GO:0008270]	Enzyme								Metall binding	Functional site
Q2G2A3	Q2G2A3_C47	GNLGGVULNVGCIPSK						SAOUHSC_01043	Dihydrolipoyl dehydrogenase	no	dihydrolipoyl dehydrogenase activity [GO:0004148]; electron transfer activity [GO:0009055]; flavin adenine dinucleotide binding [GO:0050660]	Enzyme
Q2G2A3	Q2G2A3_C52	GNLGGVCLNVGUIPSK						SAOUHSC_01043	Dihydrolipoyl dehydrogenase	no	dihydrolipoyl dehydrogenase activity [GO:0004148]; electron transfer activity [GO:0009055]; flavin adenine dinucleotide binding [GO:0050660]	Enzyme
Q2G2A4	Q2G2A4_C346	GATUTISNIGSAGGQWFTPVINHPEVAILGIGR	-0.0570314	0.00633393	-0.0818733	0.093425	-0.0253487	SAOUHSC_01042	Dihydrolipoamide acetyltransferase component of pyruvate dehydrogenase complex	no	transferase activity, transferring acyl groups [GO:0016746]	Enzyme
Q2G2A7	Q2G2A7_C307	GVHYEIUCIDNK	-0.00476877	0.0103502			0.00279071	potA	Spermidine/putrescine import ATP-binding protein PotA	no	ATP binding [GO:0005524]; putrescine-importing ATPase activity [GO:0015594]; spermidine-importing ATPase activity [GO:0015595]	Receptor/Transporter/Channel	membrane/cell wall
Q2G2A7	Q2G2A7_C308	GVHYEICUIDNK		0.114367		-0.325322	-0.105478	potA	Spermidine/putrescine import ATP-binding protein PotA	no	ATP binding [GO:0005524]; putrescine-importing ATPase activity [GO:0015594]; spermidine-importing ATPase activity [GO:0015595]	Receptor/Transporter/Channel	membrane/cell wall
Q2G2C1	Q2G2C1_C232	DUSVQRR	-0.361759	0.136373	0.184725	-0.0994678	0.0184527	SAOUHSC_01064	Pyruvate carboxylase	no	ATP binding [GO:0005524]; biotin binding [GO:0009374]; metal ion binding [GO:0046872]; pyruvate carboxylase activity [GO:0004736]	Enzyme
Q2G2C1	Q2G2C1_C259	IUDAAIQLMENIK	-0.268747	-0.105892	-0.495308	-0.0801032	-0.18732	SAOUHSC_01064	Pyruvate carboxylase	no	ATP binding [GO:0005524]; biotin binding [GO:0009374]; metal ion binding [GO:0046872]; pyruvate carboxylase activity [GO:0004736]	Enzyme
Q2G2C1	Q2G2C1_C345	DITTLGYAIQUR	-0.113536	-0.205896	-0.199007	-0.175925	-0.187466	SAOUHSC_01064	Pyruvate carboxylase	no	ATP binding [GO:0005524]; biotin binding [GO:0009374]; metal ion binding [GO:0046872]; pyruvate carboxylase activity [GO:0004736]	Enzyme
Q2G2C1	Q2G2C1_C675	ISEGTIUYTGDILNPER	-0.303728	-0.0921249	-0.168431	-0.158459	-0.163445	SAOUHSC_01064	Pyruvate carboxylase	no	ATP binding [GO:0005524]; biotin binding [GO:0009374]; metal ion binding [GO:0046872]; pyruvate carboxylase activity [GO:0004736]	Enzyme
Q2G2C1	Q2G2C1_C98	RUAEEGIK	-0.291204	-0.176055	-0.494089	-0.182213	-0.236708	SAOUHSC_01064	Pyruvate carboxylase	no	ATP binding [GO:0005524]; biotin binding [GO:0009374]; metal ion binding [GO:0046872]; pyruvate carboxylase activity [GO:0004736]	Enzyme
Q2G2C4	Q2G2C4_C196	EILSDAUK	-0.429772	0.196103	-0.378165	-0.50132	-0.403968	tarI'	Ribitol-5-phosphate cytidylyltransferase 2	no	2-C-methyl-D-erythritol 4-phosphate cytidylyltransferase activity [GO:0050518]; D-ribitol-5-phosphate cytidylyltransferase activity [GO:0047349]	Enzyme
Q2G2C9	Q2G2C9_C56	LITDKUK	-0.135951	-0.348372	-0.553828	-0.167037	-0.257705	SAOUHSC_01245	Uncharacterized protein	yes	0	not assigned
Q2G2D0	Q2G2D0_C633	VGTIAGUYVTEGK	-0.280072	-0.143755	-0.229585	-0.141048	-0.18667	infB	Translation initiation factor IF-2	yes	GTPase activity [GO:0003924]; GTP binding [GO:0005525]; translation initiation factor activity [GO:0003743]	Gene expression and Nucleic acid binding
Q2G2D0	Q2G2D0_C679	GYEUGITIENYNDLK	-0.126376	-0.127179	-0.0518477	0.0513025	-0.0891117	infB	Translation initiation factor IF-2	yes	GTPase activity [GO:0003924]; GTP binding [GO:0005525]; translation initiation factor activity [GO:0003743]	Gene expression and Nucleic acid binding
Q2G2D1	Q2G2D1_C11	KUILSNEMHPK	-0.213721	-0.0857723	0.11703	0.0437644	-0.0210039	SAOUHSC_01244	Uncharacterized protein	yes	0	not assigned
Q2G2D2	Q2G2D2_C251	ISVFSENNDIDAVGAUVGAK	-0.299312	-0.036082	-0.226611	-0.0639012	-0.145256	nusA	Transcription termination/antitermination protein NusA	yes	DNA binding transcription factor activity [GO:0003700]; RNA binding [GO:0003723]	Gene expression and Nucleic acid binding
Q2G2D3	Q2G2D3_C52	EGGVDLNDUTLASEK	-0.357676	-0.186905	-0.265007	-0.143813	-0.225956	rimP	Ribosome maturation factor RimP	no	0	not assigned
Q2G2D5	Q2G2D5_C103	LFAEUHK	-0.392883	0.200961	0.295971	-0.237898	-0.0184685	lacG	6-phospho-beta-galactosidase	no	6-phospho-beta-galactosidase activity [GO:0033920]; beta-glucosidase activity [GO:0008422]	Enzyme
Q2G2D7	Q2G2D7_C242	VPVUGAISSYNHPEADIGPR	-0.0666389	-0.00297502	-0.0393104	-0.0326395	-0.035975	SAOUHSC_02447	Uncharacterized protein	no	oxidoreductase activity [GO:0016491]	Enzyme
Q2G2E5	Q2G2E5_C451	LANUHDFIMQFDEGYDTLVGER	-0.0931094	-0.26833	-0.46953	-0.222566	-0.245448	SAOUHSC_00647	Uncharacterized protein	no	ATP binding [GO:0005524]; lipid-transporting ATPase activity [GO:0034040]	Receptor/Transporter/Channel	membrane/cell wall
Q2G2E9	Q2G2E9_C191	TMTUGTSISLR	-0.142312	0.0124119	-0.0271603	-0.00443589	-0.0157981	SAOUHSC_00030	Uncharacterized protein	no	0	not assigned
Q2G2F3	Q2G2F3_C69	EIGEFSEHHFYUAIFIPSTEDHAYQLEK	-0.170289	0.352119	-0.00503356	-0.0770683	-0.041051	traP	Signal transduction protein TRAP	no	0	not assigned	membrane/cell wall
Q2G2G0	Q2G2G0_C133	YDEVTIYUK	-0.295586	-0.131917	-0.272418	-0.107415	-0.202167	SAOUHSC_00717	Uncharacterized protein	no	0	not assigned
Q2G2G0	Q2G2G0_C21	YFLAAGAVITTLALGAUGNSNSQDQGNK						SAOUHSC_00717	Uncharacterized protein	no	0	not assigned
Q2G2G2	Q2G2G2_C17	THLLIVDDEQDIVDIUQTYFEYEGYK	-0.162455	-0.0113268	-0.365225	-0.0509257	-0.10669	saeR	Response regulator SaeR	no	DNA binding [GO:0003677]	Gene expression and Nucleic acid binding
Q2G2G7	Q2G2G7_C134	VULDHMKPDKPFIK	-0.177865	-0.0704817	-0.13733		-0.13733	SAOUHSC_01054	UPF0637 protein SAOUHSC_01054	no	0	not assigned
Q2G2G9	Q2G2G9_C101	EEISEQAISEVIEYUYR	-0.1326	-0.0597787	-0.174719	-0.0910051	-0.111803	recX	Regulatory protein RecX	no	0	not assigned
Q2G2J2	Q2G2J2_C171	NLYTSGQUTYYVFDR	0.0894982	0.456386	0.136454	0.660929	0.29642	ssaA2	Staphylococcal secretory antigen ssaA2	yes	hydrolase activity [GO:0016787]	not assigned		secreted
Q2G2J8	Q2G2J8_C226	ALLDLUDLITVMPVER	-0.261898	-0.0246633	-0.323841	-0.207195	-0.234546	SAOUHSC_01413	Uncharacterized protein SAOUHSC_01413	no	ATPase activity [GO:0016887]; ATP binding [GO:0005524]	not assigned
Q2G2J8	Q2G2J8_C57	LAETLSEVVDTPMHQVNUSVDLDTESLLGFK	-0.264391	-0.0931248	-0.180888	-0.0368218	-0.137006	SAOUHSC_01413	Uncharacterized protein SAOUHSC_01413	no	ATPase activity [GO:0016887]; ATP binding [GO:0005524]	not assigned
Q2G2L0	Q2G2L0_C124	LDSLLNFPETUPHGGVIPR	-0.084655	0.135009	0.10742	0.1121	0.10976	SAOUHSC_00638	Uncharacterized protein	no	DNA binding [GO:0003677]; DNA binding transcription factor activity [GO:0003700]; protein dimerization activity [GO:0046983]; transition metal ion binding [GO:0046914]	Modulator/Scaffolding/Adaptor
Q2G2L1	Q2G2L1_C112	MLUMGFK		0.127633	0.400538	-0.0976099	0.127633	tagH	Teichoic acids export ATP-binding protein TagH	yes	ATP binding [GO:0005524]; teichoic-acid-transporting ATPase activity [GO:0015438]	Receptor/Transporter/Channel	membrane/cell wall
Q2G2L2	Q2G2L2_C236	LNETFMSSTDUSDPSQR	-0.0270427	-0.114301		0.0614306	-0.0270427	SAOUHSC_00637	Uncharacterized protein	no	ATPase activity [GO:0016887]; ATP binding [GO:0005524]	not assigned
Q2G2L2	Q2G2L2_C97	AHIDLDFPISVEQVILSGUYK	-0.154072	-0.113801	-0.0206185	0.0404015	-0.0672098	SAOUHSC_00637	Uncharacterized protein	no	ATPase activity [GO:0016887]; ATP binding [GO:0005524]	not assigned
Q2G2L3	Q2G2L3_C103	IPGIELMDEULK	-0.157142	-0.0848998	-0.0152138	-0.0671678	-0.0760338	tarA	N-acetylglucosaminyldiphosphoundecaprenol N-acetyl-beta-D-mannosaminyltransferase	yes	N-acetylglucosaminyldiphosphoundecaprenol N-acetyl-beta-D-mannosaminyltransferase activity [GO:0047244]	Enzyme
Q2G2L7	Q2G2L7_C210	YRDLLKEUATEITEVEDK	0.280481	-0.127557			0.076462	SAOUHSC_02811	Uncharacterized protein	no	GTP diphosphokinase activity [GO:0008728]; guanosine-3',5'-bis(diphosphate) 3'-diphosphatase activity [GO:0008893]	Enzyme	membrane/cell wall
Q2G2L8	Q2G2L8_C13	LUNVTTR	-0.196723	0.0922074	0.148739		0.0922074	SAOUHSC_02810	Uncharacterized protein	no	DNA binding [GO:0003677]	Gene expression and Nucleic acid binding	membrane/cell wall
Q2G2M3	Q2G2M3_C210	LVSDKUDFYIK	-0.194377	-0.0168915	-0.04792	0.0132121	-0.0324057	SAOUHSC_00513	Uncharacterized protein	no	RNA binding [GO:0003723]; rRNA (guanosine-2'-O-)-methyltransferase activity [GO:0070039]	Gene expression and Nucleic acid binding
Q2G2M6	Q2G2M6_C28	MYVUGPTVYNYIHIGNAR	-0.294049	-0.164163	-0.00629583	-0.191187	-0.177675	cysS	Cysteine--tRNA ligase	yes	ATP binding [GO:0005524]; cysteine-tRNA ligase activity [GO:0004817]; metal ion binding [GO:0046872]	Gene expression and Nucleic acid binding								Metall binding	Functional site
Q2G2M7	Q2G2M7_C94	LFIDHGMGVVIGETUTIGDNVTIYQGVTLGGTGK	0.0130569	-0.0518014	0.497963	-0.0144051	-0.000674118	SAOUHSC_00510	Serine acetyltransferase	yes	serine O-acetyltransferase activity [GO:0009001]	Enzyme
Q2G2N4	Q2G2N4_C17	TLNNNVVVUTNNDQEVILIGK	-0.527387	0.191942	0.418892	-0.00830493	0.0918183	glcT	Protein GlcT	no	RNA binding [GO:0003723]	Gene expression and Nucleic acid binding
Q2G2N4	Q2G2N4_C242	NHYPIUYNTAYK	0.192573	0.236829		-0.320126	0.192573	glcT	Protein GlcT	no	RNA binding [GO:0003723]	Gene expression and Nucleic acid binding
Q2G2N9	Q2G2N9_C66	IIGLSGMUK	-0.0877334	-0.16681	0.16877		-0.0877334	SAOUHSC_02248	Uncharacterized protein	no	0	not assigned
Q2G2P2	Q2G2P2_C345	QGYIGAEELQVFLANKPEIYIUGGTK	-0.101648	0.0282426	-0.00297952	0.024743	0.0108817	SAOUHSC_00204	Globin domain protein	no	FAD binding [GO:0071949]; heme binding [GO:0020037]; metal ion binding [GO:0046872]; nitric oxide dioxygenase activity [GO:0008941]; oxygen binding [GO:0019825]; oxygen carrier activity [GO:0005344]	Enzyme
Q2G2P2	Q2G2P2_C86	HUALQVYAEHYPIVGK	0.117828	0.0465609	0.201383	0.0760117	0.0969199	SAOUHSC_00204	Globin domain protein	no	FAD binding [GO:0071949]; heme binding [GO:0020037]; metal ion binding [GO:0046872]; nitric oxide dioxygenase activity [GO:0008941]; oxygen binding [GO:0019825]; oxygen carrier activity [GO:0005344]	Enzyme
Q2G2P7	Q2G2P7_C443	VLAIEUVIALQAAELK			-0.686359	-0.746664	-0.716512	hutH	Histidine ammonia-lyase	no	histidine ammonia-lyase activity [GO:0004397]	Enzyme
Q2G2P7	Q2G2P7_C503	QSIYQTTAUH	-0.0728621	0.223299	0.0176369	0.0364682	0.0270525	hutH	Histidine ammonia-lyase	no	histidine ammonia-lyase activity [GO:0004397]	Enzyme
Q2G2P7	Q2G2P7_C85	SHAUGLGEPFSK	-0.182753	-0.236843	-0.381931	-0.229585	-0.233214	hutH	Histidine ammonia-lyase	no	histidine ammonia-lyase activity [GO:0004397]	Enzyme
Q2G2P8	Q2G2P8_C147	LKPQLPTUR	-0.10386	-0.0126064	0.0255958	-0.0503231	-0.0314648	nnrD	ADP-dependent (S)-NAD(P)H-hydrate dehydratase	no	ADP-dependent NAD(P)H-hydrate dehydratase activity [GO:0052855]; ATP binding [GO:0005524]	Enzyme
Q2G2P8	Q2G2P8_C50	AUVFSGSGLITVATHPTNHSALHSR	-0.727762	-0.445323		-0.46172	-0.46172	nnrD	ADP-dependent (S)-NAD(P)H-hydrate dehydratase	no	ADP-dependent NAD(P)H-hydrate dehydratase activity [GO:0052855]; ATP binding [GO:0005524]	Enzyme
Q2G2Q2	Q2G2Q2_C93	ISQHDIDYUIVVNFSSR	-0.0939406	-0.19192	-0.165985	0.0187766	-0.129963	SAOUHSC_01249	Riboflavin biosynthesis protein	yes	ATP binding [GO:0005524]; FMN adenylyltransferase activity [GO:0003919]; riboflavin kinase activity [GO:0008531]	Enzyme
Q2G2Q3	Q2G2Q3_C165	ENEUHFK	-0.336986	-0.280002	-0.0823749	-0.317472	-0.298737	truB	tRNA pseudouridine synthase B	no	pseudouridine synthase activity [GO:0009982]; RNA binding [GO:0003723]	Gene expression and Nucleic acid binding
Q2G2Q3	Q2G2Q3_C49	IGHTGTLDPEVAGVLPVUIGNATR	-0.151542	-0.181051	-0.103213	-0.0354467	-0.127378	truB	tRNA pseudouridine synthase B	no	pseudouridine synthase activity [GO:0009982]; RNA binding [GO:0003723]	Gene expression and Nucleic acid binding
Q2G2Q5	Q2G2Q5_C100	EDLEPWTSUEFDFTR	-0.0966488	-0.278566	0.27858		-0.0966488	SAOUHSC_00278	Uncharacterized protein	no	0	not assigned
Q2G2Q5	Q2G2Q5_C64	DUNVSKDIFK			0.249021	0.00331439	0.126167	SAOUHSC_00278	Uncharacterized protein	no	0	not assigned
Q2G2Q7	Q2G2Q7_C100	NLFKEEGLEPWTSUEFDFTR	-0.41062	-0.304968	-0.29586	-0.289067	-0.300414	SAOUHSC_00276	Uncharacterized protein	no	0	not assigned
Q2G2Q8	Q2G2Q8_C147	DLFKEEGLEPWTSUEFDFTSEGK	-0.0622187	-0.188776	-0.255839	-0.475876	-0.222307	SAOUHSC_00275	Uncharacterized protein	no	0	not assigned
Q2G2Q9	Q2G2Q9_C100	ETFKEEGLEPWTSUEFDFTR	0.0876796	-0.0581275	-0.21395	-0.584523	-0.136039	SAOUHSC_00274	Uncharacterized protein	no	0	not assigned
Q2G2R0	Q2G2R0_C7	IALGUDHIVTDTK	-0.159879	-0.478406	-0.085711	-0.0491584	-0.122795	lacB	Galactose-6-phosphate isomerase subunit LacB	no	galactose-6-phosphate isomerase activity [GO:0050044]	Enzyme
Q2G2R5	Q2G2R5_C49	ADALIEEGNNUIAEAHR	-0.679989	-0.108208	-0.156048	-0.175419	-0.165734	SAOUHSC_02451	PTS system lactose-specific IIA component, putative	no	0	not assigned
Q2G2R7	Q2G2R7_C14	FKUNSEAK	-0.0988145	-0.358805	0.489132	-0.0921556	-0.0954851	SAOUHSC_02129	Uncharacterized protein	no	cysteine-type endopeptidase inhibitor activity [GO:0004869]	Modulator/Scaffolding/Adaptor
Q2G2R7	Q2G2R7_C53	FILSTSDDSDYIUK	-0.179596	-0.0744714	0.028852	0.0518593	-0.0228097	SAOUHSC_02129	Uncharacterized protein	no	cysteine-type endopeptidase inhibitor activity [GO:0004869]	Modulator/Scaffolding/Adaptor
Q2G2S0	Q2G2S0_C199	MSGAVGTFANIPPEIESYVUK	-0.524023	-0.372356	-0.399026	-0.223054	-0.385691	purB	Adenylosuccinate lyase	no	(S)-2-(5-amino-1-(5-phospho-D-ribosyl)imidazole-4-carboxamido)succinate AMP-lyase (fumarate-forming) activity [GO:0070626]; N6-(1,2-dicarboxyethyl)AMP AMP-lyase (fumarate-forming) activity [GO:0004018]	Enzyme
Q2G2S0	Q2G2S0_C411	EELDEUFDPK	-0.301392	-0.482365	-0.0516234		-0.301392	purB	Adenylosuccinate lyase	no	(S)-2-(5-amino-1-(5-phospho-D-ribosyl)imidazole-4-carboxamido)succinate AMP-lyase (fumarate-forming) activity [GO:0070626]; N6-(1,2-dicarboxyethyl)AMP AMP-lyase (fumarate-forming) activity [GO:0004018]	Enzyme
Q2G2S7	Q2G2S7_C228	GULLIEGDHLK	-0.249115	-0.0215971	0.0119177	0.0483536	-0.0048397	SAOUHSC_01975	Uncharacterized protein	no	hydrolase activity [GO:0016787]	not assigned
Q2G2S7	Q2G2S7_C7	FIHUSDLHLDSPFK	-0.308036	-0.0355961	0.0673334	-0.0457287	-0.0406624	SAOUHSC_01975	Uncharacterized protein	no	hydrolase activity [GO:0016787]	not assigned
Q2G2S7	Q2G2S7_C90	LQNEQIFVYVUHGNHDPLSSK	-0.346775	-0.0821635	-0.223104	-0.0014723	-0.152634	SAOUHSC_01975	Uncharacterized protein	no	hydrolase activity [GO:0016787]	not assigned
Q2G2S8	Q2G2S8_C955	SLSEHYQVLYFTUVK	-0.180528	-0.162186	-0.135111	-0.0701333	-0.148648	SAOUHSC_01974	Uncharacterized protein	no	0	not assigned	membrane/cell wall
Q2G2T1	Q2G2T1_C174	SIUDIYPLLNK	-0.210479	-0.127116	-0.297892	-0.228385	-0.219432	SAOUHSC_01973	Uncharacterized protein	no	nucleic acid binding [GO:0003676]	Gene expression and Nucleic acid binding
Q2G2T1	Q2G2T1_C270	EAEILUYIDNIDAR	0.00561557	-0.176022	-0.169907	0.1129	-0.0821457	SAOUHSC_01973	Uncharacterized protein	no	nucleic acid binding [GO:0003676]	Gene expression and Nucleic acid binding
Q2G2T8	Q2G2T8_C139	AIGVUNFNVHHLEK	-0.188434	-0.11759	-0.421253	0.0972471	-0.153012	SAOUHSC_00712	Uncharacterized protein	no	oxidoreductase activity [GO:0016491]	Enzyme
Q2G2U1	Q2G2U1_C226	TLEVNFUNEIDAFYQYR	-0.0997418	0.0695647	0.0994972	0.0291348	0.0493497	saeS	Histidine protein kinase SaeS	no	ATP binding [GO:0005524]; phosphorelay sensor kinase activity [GO:0000155]	Receptor/Transporter/Channel	membrane/cell wall
Q2G2U6	Q2G2U6_C65	DGMEVUR	-0.0873042	-0.121204	-0.0994017	-0.0122135	-0.0933529	walR	Transcriptional regulatory protein WalR	yes	DNA binding [GO:0003677]	Gene expression and Nucleic acid binding
Q2G2U9	Q2G2U9_C9	INDUFELLSMVTYADK	-0.280942	-0.165609	-0.242407	-0.0199193	-0.204008	sarA	Transcriptional regulator SarA	yes	DNA binding [GO:0003677]; metal ion binding [GO:0046872]	Gene expression and Nucleic acid binding								Metall binding	Functional site
Q2G2V3	Q2G2V3_C193	NHYASAIGUK	-0.0540627	0.449007	0.807355	0.597507	0.523257	menE	2-succinylbenzoate--CoA ligase	no	ATP binding [GO:0005524]; o-succinylbenzoate-CoA ligase activity [GO:0008756]	Enzyme
Q2G2V3	Q2G2V3_C99	SIDVQLIFUTLPLELR						menE	2-succinylbenzoate--CoA ligase	no	ATP binding [GO:0005524]; o-succinylbenzoate-CoA ligase activity [GO:0008756]	Enzyme
Q2G2V4	Q2G2V4_C24	FISPLTPPTUR	0.0401209	0.0487942	0.30906	0.663663	0.178927	SAOUHSC_01914	Putative membrane protein insertion efficiency factor	no	0	not assigned	membrane/cell wall
Q2G2V4	Q2G2V4_C30	FYPTUSEYTR	0.18916	-0.105784			0.0416883	SAOUHSC_01914	Putative membrane protein insertion efficiency factor	no	0	not assigned	membrane/cell wall
Q2G2W4	Q2G2W4_C31	MIUAYCNINR	0.569199	-0.18996		0.0962619	0.0962619	SAOUHSC_02631	Uncharacterized protein	no	DNA binding transcription factor activity [GO:0003700]; transcription regulatory region sequence-specific DNA binding [GO:0000976]	Gene expression and Nucleic acid binding					DNA binding				Functional site
Q2G2W8	Q2G2W8_C82	DNLAILYGEGFHIUK	-0.66502	0.285343	0.579277		0.285343	SAOUHSC_00456	Initiation-control protein YabA	no	0	not assigned
Q2G2W9	Q2G2W9_C105	LVNUEYTLDK	-0.0278809	0.0869196	0.263155	0.368265	0.175037	SAOUHSC_00455	Uncharacterized protein	no	0	not assigned
Q2G2W9	Q2G2W9_C161	LLGGIGPUGR	0.490981	0.402286	0.577634	0.820975	0.534308	SAOUHSC_00455	Uncharacterized protein	no	0	not assigned
Q2G2W9	Q2G2W9_C166	SLUCSTFLGDFEPVSIK	0.241108	0.334111		0.621056	0.334111	SAOUHSC_00455	Uncharacterized protein	no	0	not assigned
Q2G2W9	Q2G2W9_C167	SLCUSTFLGDFEPVSIK						SAOUHSC_00455	Uncharacterized protein	no	0	not assigned
Q2G2W9	Q2G2W9_C198	ISGAUGR	0.449429	0.488515	0.775935	0.517024	0.502769	SAOUHSC_00455	Uncharacterized protein	no	0	not assigned
Q2G2W9	Q2G2W9_C203	LMUCLKYENDYYEEVR	0.361993	0.415867	0.521955		0.415867	SAOUHSC_00455	Uncharacterized protein	no	0	not assigned
Q2G2W9	Q2G2W9_C89	DAENALILUK		0.195852	0.792022		0.493937	SAOUHSC_00455	Uncharacterized protein	no	0	not assigned
Q2G2X4	Q2G2X4_C161	VYQATDFYLVGUEQMSQCFK	-0.0898451	-5.3316e-05	0.649202		-5.3316e-05	tarB	Teichoic acid glycerol-phosphate primase	yes	CDP-glycerol glycerophosphotransferase activity [GO:0047355]	Enzyme	membrane/cell wall
Q2G2X4	Q2G2X4_C167	VYQATDFYLVGCEQMSQUFK	0.0123541		0.0648829		0.0386185	tarB	Teichoic acid glycerol-phosphate primase	yes	CDP-glycerol glycerophosphotransferase activity [GO:0047355]	Enzyme	membrane/cell wall
Q53700	Q53700_C131	FYUNVCHK						cobB	NAD-dependent protein deacetylase	no	metal ion binding [GO:0046872]; NAD+ binding [GO:0070403]; NAD-dependent protein deacetylase activity [GO:0034979]	Enzyme								Metall binding	Functional site
Q53700	Q53700_C134	FYCNVUHK	-0.50032	-0.126486	-0.108923	-0.220614	-0.17355	cobB	NAD-dependent protein deacetylase	no	metal ion binding [GO:0046872]; NAD+ binding [GO:0070403]; NAD-dependent protein deacetylase activity [GO:0034979]	Enzyme								Metall binding	Functional site
Q53700	Q53700_C72	DYLEDDPEGFINFUHK	-0.142979	-0.0043963	-0.0718154	0.0997665	-0.0381059	cobB	NAD-dependent protein deacetylase	no	metal ion binding [GO:0046872]; NAD+ binding [GO:0070403]; NAD-dependent protein deacetylase activity [GO:0034979]	Enzyme
Q53705	Q53705_C309	LKEVHTKEEIGUSHPNCPLR	-0.161556	-0.34628	-0.62658	-0.241032	-0.293656	lytS	Sensor protein LytS	no	ATP binding [GO:0005524]; phosphorelay sensor kinase activity [GO:0000155]	Receptor/Transporter/Channel	membrane/cell wall
Q53726	Q53726_C121	TYGHSIDFEEVIFEGYVVUNADSK	-0.283281	0.466236	-0.207944		-0.207944	pcrB	Heptaprenylglyceryl phosphate synthase	no	metal ion binding [GO:0046872]; polyprenyltransferase activity [GO:0002094]; prenyltransferase activity [GO:0004659]	Enzyme
Q53727	Q53727_C243	NLUVVGDSDQSIYGWR	-0.376751	0.317536	0.0277203	0.479334	0.172628	pcrA	ATP-dependent DNA helicase PcrA	yes	ATP binding [GO:0005524]; ATP-dependent DNA helicase activity [GO:0004003]; DNA binding [GO:0003677]	Gene expression and Nucleic acid binding
Q53727	Q53727_C597	IUYVAITR	0.0670674	0.365998	0.701225	0.58036	0.473179	pcrA	ATP-dependent DNA helicase PcrA	yes	ATP binding [GO:0005524]; ATP-dependent DNA helicase activity [GO:0004003]; DNA binding [GO:0003677]	Gene expression and Nucleic acid binding
Q53727	Q53727_C92	LVGDQAEVIWMSTFHSMUVR						pcrA	ATP-dependent DNA helicase PcrA	yes	ATP binding [GO:0005524]; ATP-dependent DNA helicase activity [GO:0004003]; DNA binding [GO:0003677]	Gene expression and Nucleic acid binding
Q7X2S2	Q7X2S2_C190	NIVIAUGGGGIPVIK	-0.0728004	0.218493	0.20803	0.206027	0.207028	arcC2	Carbamate kinase 2	no	ATP binding [GO:0005524]; carbamate kinase activity [GO:0008804]	Enzyme
Q7X2S2	Q7X2S2_C78	SNSDTTPAMPLDTUGAMSQGMIGYWLETEINR	0.0306892	0.278936	0.443819	0.27965	0.279293	arcC2	Carbamate kinase 2	no	ATP binding [GO:0005524]; carbamate kinase activity [GO:0008804]	Enzyme
Q93T05	Q93T05_C283	FPIUYINIEMDPILVDVNVHPTK	0.79776	0.597984			0.697872	mutL	DNA mismatch repair protein MutL	no	ATPase activity [GO:0016887]; ATP binding [GO:0005524]; mismatched DNA binding [GO:0030983]; single-stranded DNA binding [GO:0003697]	Gene expression and Nucleic acid binding
Q93T05	Q93T05_C615	EDVAIMMSUK	-0.0115466	-0.259944	-0.122716	0.115879	-0.0671314	mutL	DNA mismatch repair protein MutL	no	ATPase activity [GO:0016887]; ATP binding [GO:0005524]; mismatched DNA binding [GO:0030983]; single-stranded DNA binding [GO:0003697]	Gene expression and Nucleic acid binding
Q93T05	Q93T05_C646	EAEDPFTUPHGR	-0.130492	-0.0913534	0.382164	-0.00219456	-0.046774	mutL	DNA mismatch repair protein MutL	no	ATPase activity [GO:0016887]; ATP binding [GO:0005524]; mismatched DNA binding [GO:0030983]; single-stranded DNA binding [GO:0003697]	Gene expression and Nucleic acid binding
Q9F0R1	Q9F0R1_C57	EIAKUSEFKPYYLTK			0.584482	-0.163559	0.210461	sarR	HTH-type transcriptional regulator SarR	no	transcription regulatory region DNA binding [GO:0044212]	Gene expression and Nucleic acid binding					DNA binding				Functional site
Q9F1K0	Q9F1K0_C162	KHVWIQNVUYQTR						dnaE	DNA polymerase III subunit alpha	yes	3'-5' exonuclease activity [GO:0008408]; DNA-directed DNA polymerase activity [GO:0003887]; nucleic acid binding [GO:0003676]	Gene expression and Nucleic acid binding
Q9RQQ0	Q9RQQ0_C55	CUFDYLNNIIMMNQNK	0.0479571	0.437121	-0.0137711	-0.0361264	0.017093	icaR	Biofilm operon icaADBC HTH-type negative transcriptional regulator IcaR	no	DNA binding transcription factor activity [GO:0003700]; transcription regulatory region sequence-specific DNA binding [GO:0000976]	Gene expression and Nucleic acid binding
Q9ZAH5	Q9ZAH5_C311	VUMDQTIVK	-0.317085	-0.112522	-0.635629	-0.0669713	-0.214803	alr1	Alanine racemase 1	no	alanine racemase activity [GO:0008784]	Enzyme				Binding site					Functional site
Q9ZAH6	Q9ZAH6_C80	HVAFNDIDUYNDELGKPK	-0.143182	-0.0767671	-0.334389	0.205017	-0.109974	acpS	Holo-[acyl-carrier-protein] synthase	yes	holo-[acyl-carrier-protein] synthase activity [GO:0008897]; magnesium ion binding [GO:0000287]	Enzyme

## Sheet: Perseus-Results
Leading razor protein	Identifier	Sequence	gene name	name	essential?	neg Log T-test p-value	Hit	T-test Significant	Median 100 µM	Ratio H/L 100vs100_1	Ratio H/L 100vs100_2	Ratio H/L 100vs100_3	Ratio H/L 100vs100_4	T-test Difference	Gene ontology (molecular function)	GO class	membrane/cell wall	secreted	Active site	Binding site	DNA binding	Nucleotide binding	Site	Metall binding	Functional site
Q2G198	Q2G198_C2	UTGFTIQTLNNQVLLGR	SAOUHSC_00247	Uncharacterized protein	no	2.25347	+	+	2.08631	2.29037	2.80546	1.43007	1.88225	2.10204	0	not assigned
Q2FWA0	Q2FWA0_C2	UGIVGYIGYDNAK	glmS	Glutamine--fructose-6-phosphate aminotransferase [isomerizing]	yes	2.04397	+	+	2.03909	2.33171	1.74648	3.12816	1.51278	2.17978	carbohydrate derivative binding [GO:0097367];glutamine-fructose-6-phosphate transaminase (isomerizing) activity [GO:0004360]	Enzyme			Active site						Functional site
Q2FWD5	Q2FWD5_C4	MEVUPYLEETFK	SAOUHSC_02364	Uncharacterized protein	no	3.18871	+	+	1.98933	1.68921	1.8017	2.21054	2.17696	1.9696	0	not assigned
Q2FWC2	Q2FWC2_C63	RPSQULK	SAOUHSC_02376	Uncharacterized protein	no	3.21428	+	+	1.8608	1.46764	1.77117	1.97801	1.95043	1.79181	0	not assigned	membrane/cell wall
Q2FZR9	Q2FZR9_C165	GPNGATVTAUATGTNSIGEAFK	SAOUHSC_00921	3-oxoacyl-[acyl-carrier-protein] synthase 2	yes	2.25796	+	+	1.83966	1.34335	1.4328	2.28134	2.24653	1.82601	beta-ketoacyl-acyl-carrier-protein synthase II activity [GO:0033817]	Enzyme			Active site						Functional site
Q2G1J0	Q2G1J0_C290	SANIILDDANLDLAVEGIQLGILFNQGEVUSAGSR	aldA	Putative aldehyde dehydrogenase AldA	no	1.83688	+	+	1.63388	1.59651	1.67125			1.63388	aldehyde dehydrogenase (NAD) activity [GO:0004029]	Enzyme			Active site						Functional site
Q2G1A8	Q2G1A8_C229	ENRPMFUK	SAOUHSC_00237	Uncharacterized protein	no	3.00102	+	+	1.61886	1.74188	1.49585	1.40108	1.96872	1.65188	0	not assigned
P0A0K3	P0A0K3_C105	NDVPTFAIUHGPQILIDTDDLK	SAOUHSC_02013	Uncharacterized protein SAOUHSC_02013	no	2.49046	+	+	1.49931	1.3069	1.59024		1.49931	1.46549	0	not assigned
Q2FWG2	Q2FWG2_C190	VTGAGULLGGVIAGFLFR	thiM	Hydroxyethylthiazole kinase	no	2.96596	+	+	1.37625	1.09586	1.27679	1.5827	1.47571	1.35776	ATP binding [GO:0005524];hydroxyethylthiazole kinase activity [GO:0004417];metal ion binding [GO:0046872]	Enzyme				Binding site					Functional site
Q2FWD5	Q2FWD5_C32	CNDUSAHFSDMK	SAOUHSC_02364	Uncharacterized protein	no	2.44059	+	+	1.32427	1.00712	1.11073	1.5378	1.66178	1.32936	0	not assigned
Q2FZW2	Q2FZW2_C51	LQLHGACGTUPSSTITLK	SAOUHSC_00873	Uncharacterized protein	no	2.42006	+	+	1.29681	0.872159	1.2725	1.62919	1.32112	1.27374	iron ion binding [GO:0005506];iron-sulfur cluster binding [GO:0051536]	not assigned
Q2G1D0	Q2G1D0_C379	YGMVTMUIGVGMGAAAIFEYVR	SAOUHSC_00195	Acetyl-CoA acetyltransferase. putative	no	2.38374	+	+	1.29478	1.29478	1.34102		1.08154	1.23911	transferase activity. transferring acyl groups other than amino-acyl groups [GO:0016747]	Enzyme	membrane/cell wall		Active site						Functional site
Q2FZW2	Q2FZW2_C48	LQLHGAUGTCPSSTITLK	SAOUHSC_00873	Uncharacterized protein	no	2.43804	+	+	1.2629	0.912343	1.25592	1.66289	1.26987	1.27526	iron ion binding [GO:0005506];iron-sulfur cluster binding [GO:0051536]	not assigned
Q2G081	Q2G081_C50	FNUPEFTSLCPITGQPDFATIYISYIPNVK	queF	NADPH-dependent 7-cyano-7-deazaguanine reductase	no	1.54676	+	+	1.19168	0.958434	0.328607	1.42492	1.42932	1.03532	oxidoreductase activity. acting on other nitrogenous compounds as donors. with NAD or NADP as acceptor [GO:0046857];preQ1 synthase activity [GO:0033739]	Enzyme
Q2FZX4	Q2FZX4_C68	TATFMILGAVUTR	lipA	Lipoyl synthase	no	2.52773	+	+	1.14757	1.08706	1.14757		1.30319	1.17927	4 iron. 4 sulfur cluster binding [GO:0051539];lipoate synthase activity [GO:0016992];metal ion binding [GO:0046872]	Enzyme								Metall binding	Functional site
Q2G0B1	Q2G0B1_C12	EQLUFSLYNAQR	mgrA	HTH-type transcriptional regulator MgrA	no	2.71052	+	+	1.12914	0.786345	1.0664	1.25846	1.19188	1.07577	DNA binding transcription factor activity [GO:0003700];transcription regulatory region DNA binding [GO:0044212]	Gene expression and Nucleic acid binding
P69848	P69848_C24	LSVTDRUNFR	moaA	GTP 3'.8-cyclase	no	1.42755	+	+	1.0767	0.768671	1.0767	1.54127		1.12888	4 iron. 4 sulfur cluster binding [GO:0051539];GTP 3'.8'-cyclase activity [GO:0061798];GTP binding [GO:0005525];metal ion binding [GO:0046872]	Enzyme								Metall binding	Functional site
Q2FVM2	Q2FVM2_C185	YUMTGCPYKK	SAOUHSC_02680	Nitrate reductase. beta subunit	no	1.08094			1.04622	0.909043	1.18339			1.04622	nitrate reductase activity [GO:0008940]	Enzyme
P69848	P69848_C278	LSSDGKFYGULFATVDGFNVK	moaA	GTP 3'.8-cyclase	no	1.61724		+	0.986469	0.636451	0.992986	1.87723	0.979952	1.12166	4 iron. 4 sulfur cluster binding [GO:0051539];GTP 3'.8'-cyclase activity [GO:0061798];GTP binding [GO:0005525];metal ion binding [GO:0046872]	Enzyme								Metall binding	Functional site
Q2FWG1	Q2FWG1_C215	HTHGTGUTFSAVITAELAK	SAOUHSC_02330	Phosphomethylpyrimidine kinase	no	3.35412		+	0.968121	1.08172	0.88327	0.860049	1.05297	0.969504	ATP binding [GO:0005524];phosphomethylpyrimidine kinase activity [GO:0008972]	Enzyme
Q2FVN3	Q2FVN3_C13	QLUFLFYVSSK	sarZ	HTH-type transcriptional regulator SarZ	no	2.52976		+	0.93499	0.587173	0.875544	0.999423	0.994435	0.864144	DNA binding transcription factor activity [GO:0003700];transcription regulatory region DNA binding [GO:0044212]	Gene expression and Nucleic acid binding
Q2FXR8	Q2FXR8_C774	FUNPSTLNISTDVEIPEK	valS	Valine--tRNA ligase	yes	1.70106		+	0.927567	0.898557	0.956577			0.927567	aminoacyl-tRNA editing activity [GO:0002161];ATP binding [GO:0005524];valine-tRNA ligase activity [GO:0004832]	Gene expression and Nucleic acid binding
Q2FZW2	Q2FZW2_C30	DGGDUSLIDVEDGIVK	SAOUHSC_00873	Uncharacterized protein	no	2.1912		+	0.905086	0.488823	0.868766	1.05665	0.941407	0.838912	iron ion binding [GO:0005506];iron-sulfur cluster binding [GO:0051536]	not assigned
Q2FV28	Q2FV28_C200	SIEMUNDYNIFR	queH	Epoxyqueuosine reductase QueH	no	2.178		+	0.903193	0.844466	0.623118	1.28244	0.96192	0.927986	4 iron. 4 sulfur cluster binding [GO:0051539];epoxyqueuosine reductase activity [GO:0052693];metal ion binding [GO:0046872]	Enzyme
Q2FZ60	Q2FZ60_C5	QUFVTGR	rpmB	50S ribosomal protein L28	yes	1.5511		+	0.899113	0.316714	0.751992	1.32256	1.04624	0.859376	structural constituent of ribosome [GO:0003735]	Modulator/Scaffolding/Adaptor
Q2FVS1	Q2FVS1_C194	KSDUMFPEDTWK	SAOUHSC_02621	Putative 3-methyladenine DNA glycosylase	no	2.19814		+	0.893866	0.490878	0.891963	0.895768	1.06447	0.83577	alkylbase DNA N-glycosylase activity [GO:0003905];DNA binding [GO:0003677]	Gene expression and Nucleic acid binding
Q2FUT4	Q2FUT4_C24	LNLMIPSSSHLIELYNIUSHPQANIYTPK	SAOUHSC_03017	Uncharacterized protein	no	0.824115			0.887045	0.674189		1.0999		0.887045	0	not assigned
Q2FUX7	Q2FUX7_C210	DUPFNIEGGDELVLSK	arcA	Arginine deiminase	no	2.10408		+	0.886496	0.598745	0.757342	1.24349	1.01565	0.903806	arginine deiminase activity [GO:0016990]	Enzyme
P72360	P72360_C191	MSELTSSYEPPIEAUGTWR	scdA	Iron-sulfur cluster repair protein ScdA	no	1.28515			0.881273	0.881273	1.49288	0.690015		1.02139	metal ion binding [GO:0046872]	not assigned
Q2FZX9	Q2FZX9_C130	KQVPVCUFTFGIPSEQIISR	SAOUHSC_00855	Probable nitronate monooxygenase	no	1.22317			0.867792	0.786011	0.949572			0.867792	nitronate monooxygenase activity [GO:0018580]	Enzyme
P69848	P69848_C31	CDYUMPK	moaA	GTP 3'.8-cyclase	no	2.46634		+	0.854796	0.88096	0.966873	0.828632	0.532367	0.802208	4 iron. 4 sulfur cluster binding [GO:0051539];GTP 3'.8'-cyclase activity [GO:0061798];GTP binding [GO:0005525];metal ion binding [GO:0046872]	Enzyme				Binding site				Metall binding	Functional site
Q2G1G2	Q2G1G2_C219	INTLQSFAESFMRPUQLAK	SAOUHSC_00162	Type I restriction enzyme R Protein	no	3.82936		+	0.825223	0.801407	0.860446	0.849038	0.715893	0.806696	ATP binding [GO:0005524];DNA binding [GO:0003677];Type I site-specific deoxyribonuclease activity [GO:0009035]	Gene expression and Nucleic acid binding
Q2FYU7	Q2FYU7_C368	GVGIENIUPFSR	katA	Catalase	no	3.71906		+	0.824296	0.738379	0.785843	0.899253	0.862749	0.821556	catalase activity [GO:0004096];heme binding [GO:0020037];metal ion binding [GO:0046872]	Enzyme
Q2FWD1	Q2FWD1_C382	ENNVPFFGIULGMQLATVEFSR	pyrG	CTP synthase	yes	0.810447			0.769738	0.57889	0.960586			0.769738	ATP binding [GO:0005524];CTP synthase activity [GO:0003883];metal ion binding [GO:0046872]	Enzyme			Active site						Functional site
Q2FXE1	Q2FXE1_C105	ENLVYUDLIEHLILHAIITK	SAOUHSC_01922	Uncharacterized protein	no	2.2346		+	0.763327	0.763327	0.62882	0.819259		0.737135	0	not assigned
Q2FXJ0	Q2FXJ0_C152	TSFLIGDGTGMGLPESDYFAFEAUEYR	murC	UDP-N-acetylmuramate--L-alanine ligase	yes	1.96885		+	0.747142	0.374296	0.642143	0.85214	0.916782	0.69634	ATP binding [GO:0005524];UDP-N-acetylmuramate-L-alanine ligase activity [GO:0008763]	Enzyme
Q2FVV9	Q2FVV9_C267	TVCTYUGVGCSFEVWTK	SAOUHSC_02582	Putative formate dehydrogenase SAOUHSC_02582	no	2.15888		+	0.746055	0.770279	0.746055		0.583615	0.699983	2 iron. 2 sulfur cluster binding [GO:0051537];4 iron. 4 sulfur cluster binding [GO:0051539];electron transfer activity [GO:0009055];formate dehydrogenase (NAD+) activity [GO:0008863];iron-sulfur cluster binding [GO:0051536];metal ion binding [GO:0046872];molybdopterin cofactor binding [GO:0043546];NADH dehydrogenase activity [GO:0003954]	Enzyme								Metall binding	Functional site
Q2FZX4	Q2FZX4_C41	EKNLNTVUEEAK	lipA	Lipoyl synthase	no	1.04735			0.744601	0.17342	0.415862	1.07334	1.6612	0.830956	4 iron. 4 sulfur cluster binding [GO:0051539];lipoate synthase activity [GO:0016992];metal ion binding [GO:0046872]	Enzyme								Metall binding	Functional site
Q2G032	Q2G032_C151	TIVFNTNHQELDGSETVVSGASUTTNSLAPVAK	SAOUHSC_00795	Glyceraldehyde-3-phosphate dehydrogenase	yes	0.273949			0.715278	-0.806645	1.77231		0.715278	0.560314	NAD binding [GO:0051287];NADP binding [GO:0050661];oxidoreductase activity. acting on the aldehyde or oxo group of donors. NAD or NADP as acceptor [GO:0016620]	Enzyme			Active site						Functional site
Q2FWY2	Q2FWY2_C133	SINQVEIVGVUTDICVLHTAISAYNLGYK	SAOUHSC_02139	Pyrazinamidase/nicotinamidase. putative	no	1.28784			0.703522	0.646439	0.760604			0.703522	hydrolase activity [GO:0016787]	not assigned
Q93T05	Q93T05_C283	FPIUYINIEMDPILVDVNVHPTK	mutL	DNA mismatch repair protein MutL	no	1.04332			0.697872	0.79776	0.597984			0.697872	ATPase activity [GO:0016887];ATP binding [GO:0005524];mismatched DNA binding [GO:0030983];single-stranded DNA binding [GO:0003697]	Gene expression and Nucleic acid binding
Q2FWD6	Q2FWD6_C279	VVNNTGQVUTAGTR	SAOUHSC_02363	Putative aldehyde dehydrogenase SAOUHSC_02363	no	1.72486		+	0.683382	0.603502	0.683382		0.946656	0.744513	aldehyde dehydrogenase [NAD(P)+] activity [GO:0004030]	Enzyme			Active site						Functional site
Q2FXV6	Q2FXV6_C102	TPNPDVMUNK	mnmA	tRNA-specific 2-thiouridylase MnmA	yes	2.69853		+	0.67242	0.497941	0.601195	0.772392	0.743644	0.653793	ATP binding [GO:0005524];sulfurtransferase activity [GO:0016783];tRNA binding [GO:0000049]	Enzyme			Active site						Functional site
Q2FV28	Q2FV28_C132	CTAUFEMR	queH	Epoxyqueuosine reductase QueH	no	0.948687			0.662621	-0.0437649	0.388575	1.20546	0.936666	0.621733	4 iron. 4 sulfur cluster binding [GO:0051539];epoxyqueuosine reductase activity [GO:0052693];metal ion binding [GO:0046872]	Enzyme								Metall binding	Functional site
Q2G234	Q2G234_C354	ESNANQUPFHH	SAOUHSC_02134	Nitric oxide synthase oxygenase	no	1.97637		+	0.65397	0.347099	0.552967	0.829525	0.754973	0.621141	heme binding [GO:0020037];metal ion binding [GO:0046872];nitric-oxide synthase activity [GO:0004517]	Enzyme
Q2FX49	Q2FX49_C69	TEMAVTNYLUSIR	SAOUHSC_02051	Int gene activator RinA	no	1.59919		+	0.634128	0.285935	0.517225	0.75103	0.999106	0.638324	0	not assigned
Q2FZV8	Q2FZV8_C101	QSLMGGGFQIDNPNAIASUGCGSSFR	SAOUHSC_00877	Uncharacterized protein	no	1.6119		+	0.633151	0.236829	0.596458	0.940806	0.669843	0.610984	iron-sulfur cluster binding [GO:0051536];structural molecule activity [GO:0005198]	Modulator/Scaffolding/Adaptor
Q2G0C7	Q2G0C7_C170	IMYUFNK	SAOUHSC_00678	Uncharacterized protein	no	1.51771		+	0.632082	0.752749		0.632082	0.393087	0.592639	0	not assigned
Q2FY84	Q2FY84_C115	FMNLDUISLLDKR	SAOUHSC_01580	Phi PVL ORF 30-like protein	no	1.85999		+	0.621086	0.296076	0.555054	0.687118	0.832363	0.592653	0	not assigned	membrane/cell wall
Q2FZJ1	Q2FZJ1_C13	FAVLVFPGSNUDR	purQ	Phosphoribosylformylglycinamidine synthase subunit PurQ	no	0.820797			0.618403	0.486457	-0.225519	0.750349	0.857105	0.467098	ATP binding [GO:0005524];glutaminase activity [GO:0004359];phosphoribosylformylglycinamidine synthase activity [GO:0004642]	Enzyme
Q2FWN7	Q2FWN7_C50	NVTUDDMSQIGISIR	SAOUHSC_02245	Uncharacterized protein	no	0.478258			0.614853		0.260989	0.968717		0.614853	methyltransferase activity [GO:0008168]	not assigned
Q2FZX4	Q2FZX4_C52	CPNIHEUWGAR	lipA	Lipoyl synthase	no	0.943213			0.61306	0.37829	0.61306		1.33027	0.773874	4 iron. 4 sulfur cluster binding [GO:0051539];lipoate synthase activity [GO:0016992];metal ion binding [GO:0046872]	Enzyme								Metall binding	Functional site
Q2FZ65	Q2FZ65_C103	GMGTTUVCALVFEK	SAOUHSC_01186	Uncharacterized protein	no	1.4616		+	0.604603	0.237931	0.385376	0.823831	0.862193	0.577333	protein serine/threonine phosphatase activity [GO:0004722]	Enzyme
Q2G0Y9	Q2G0Y9_C76	ILTIEASGIAPAIMAALHFDVPULFAK	xpt	Xanthine phosphoribosyltransferase	no	1.3663		+	0.593459	0.0982848	0.500394	0.686523	0.802565	0.521942	xanthine phosphoribosyltransferase activity [GO:0000310]	Enzyme
Q2FZU6	Q2FZU6_C363	EEGLLUK	rocD	Ornithine aminotransferase	no	3.47711		+	0.588806	0.53977	0.533117	0.652638	0.637842	0.590842	identical protein binding [GO:0042802];ornithine-oxo-acid transaminase activity [GO:0004587];pyridoxal phosphate binding [GO:0030170]	Enzyme
Q2G1K4	Q2G1K4_C160	SEQTLIUGTR	SAOUHSC_00118	Capsular polysaccharide biosynthesis protein Cap5E. putative	no	0.594704			0.580912	0.335712	0.826111			0.580912	UDP-glucose 4-epimerase activity [GO:0003978]	Enzyme
Q2FWK4	Q2FWK4_C199	AGVIETTFKEETETDLFGEQAVLUGGVSK	ilvC	Ketol-acid reductoisomerase (NADP(+))	no	1.86376		+	0.561538	0.258217	0.578987	0.54409	0.750864	0.533039	ketol-acid reductoisomerase activity [GO:0004455];metal ion binding [GO:0046872];NADP binding [GO:0050661]	Enzyme								Metall binding	Functional site
Q2FXV6	Q2FXV6_C199	DSTGIUFIGEK	mnmA	tRNA-specific 2-thiouridylase MnmA	yes	2.71706		+	0.558482	0.373759	0.575079	0.593971	0.541885	0.521173	ATP binding [GO:0005524];sulfurtransferase activity [GO:0016783];tRNA binding [GO:0000049]	Enzyme			Active site						Functional site
Q2FVQ5	Q2FVQ5_C78	DGTVDUSK	mqo	Probable malate:quinone oxidoreductase	no	2.32708		+	0.552915	0.359829	0.478598	0.627233	0.662773	0.532108	malate dehydrogenase (menaquinone) activity [GO:0052589];malate dehydrogenase (quinone) activity [GO:0008924]	Enzyme
Q2FYP0	Q2FYP0_C126	GIIANPNUSTIQSVVPLK	asd	Aspartate-semialdehyde dehydrogenase	no	2.05876		+	0.552289	0.30381	0.511367	0.59321	0.716069	0.531114	aspartate-semialdehyde dehydrogenase activity [GO:0004073];NAD binding [GO:0051287];NADP binding [GO:0050661];protein dimerization activity [GO:0046983]	Enzyme			Active site						Functional site
Q2FVS1	Q2FVS1_C142	AIDGATLNDUR	SAOUHSC_02621	Putative 3-methyladenine DNA glycosylase	no	1.68596		+	0.541644	0.373732	0.296193	0.709555	0.780058	0.539885	alkylbase DNA N-glycosylase activity [GO:0003905];DNA binding [GO:0003677]	Gene expression and Nucleic acid binding
Q2G2W9	Q2G2W9_C161	LLGGIGPUGR	SAOUHSC_00455	Uncharacterized protein	no	2.10432		+	0.534308	0.490981	0.402286	0.577634	0.820975	0.572969	0	not assigned
Q2FXZ6	Q2FXZ6_C11	STVAFHTLGUK	SAOUHSC_01679	Uncharacterized protein	no	1.61075		+	0.529482	0.606158	0.780478	0.452806	0.207143	0.511646	4 iron. 4 sulfur cluster binding [GO:0051539];N6-threonylcarbomyladenosine methylthiotransferase activity [GO:0035598]	Enzyme
Q2G2V3	Q2G2V3_C193	NHYASAIGUK	menE	2-succinylbenzoate--CoA ligase	no	1.03914			0.523257	-0.0540627	0.449007	0.807355	0.597507	0.449952	ATP binding [GO:0005524];o-succinylbenzoate-CoA ligase activity [GO:0008756]	Enzyme
Q2FY88	Q2FY88_C137	LENLUSLYDIDKEK	SAOUHSC_01576	Exonuclease family	no	1.46657		+	0.518238	0.893183	0.686163	0.350314	0.257964	0.546906	3'-5' exonuclease activity [GO:0008408];nucleic acid binding [GO:0003676]	Gene expression and Nucleic acid binding
Q2FZ02	Q2FZ02_C145	ERPDILIGVUGCMSQEESVVNK	miaB	tRNA-2-methylthio-N(6)-dimethylallyladenosine synthase	no	0.491441			0.51252	0.228111	0.79693			0.51252	4 iron. 4 sulfur cluster binding [GO:0051539];metal ion binding [GO:0046872];transferase activity [GO:0016740]	not assigned								Metall binding	Functional site
Q2G2W9	Q2G2W9_C198	ISGAUGR	SAOUHSC_00455	Uncharacterized protein	no	2.31421		+	0.502769	0.449429	0.488515	0.775935	0.517024	0.557726	0	not assigned
Q2FXT9	Q2FXT9_C680	EGMLLUQHLSVKPDTLK	SAOUHSC_01744	Uncharacterized protein	no	0.737603			0.498705	-0.192233	0.331017	0.666393	1.16736	0.493134	5'-3' exonuclease activity [GO:0008409];nucleic acid binding [GO:0003676]	Gene expression and Nucleic acid binding
Q2FY53	Q2FY53_C111	SNNDWQUPLTIR	SAOUHSC_01612	2-oxoisovalerate dehydrogenase. E1 component. beta subunit. putative	no	1.1741			0.495772	0.0496355	0.343736	0.647809	0.760295	0.450369	pyruvate dehydrogenase (acetyl-transferring) activity [GO:0004739]	Enzyme
Q2G078	Q2G078_C403	MSNLUTEIFQLQETSIINDYGIEDEIKR	SAOUHSC_00742	Ribonucleoside-diphosphate reductase	yes	2.48487		+	0.495523	0.356031	0.569783	0.421264	0.583423	0.482625	ATP binding [GO:0005524];ribonucleoside-diphosphate reductase activity. thioredoxin disulfide as acceptor [GO:0004748]	Enzyme
Q2G2W9	Q2G2W9_C89	DAENALILUK	SAOUHSC_00455	Uncharacterized protein	no	0.461335			0.493937		0.195852	0.792022		0.493937	0	not assigned
Q2FV14	Q2FV14_C191	AVTHUHGWGFAHLQMAPK	SAOUHSC_02929	Acetyl-CoA synthetase. putative	no	1.56837		+	0.491728	0.219215	0.332049	0.690641	0.651408	0.473328	acyl-CoA ligase activity [GO:0003996];fatty acid ligase activity [GO:0015645];fatty-acyl-CoA synthase activity [GO:0004321]	Enzyme
Q2G0J8	Q2G0J8_C110	AGEVYEASNAQYFVVDPVMVUK	SAOUHSC_00562	Phosphomethylpyrimidine kinase	no	1.15285			0.489748	0.425889	0.489748	0.988485		0.634707	ATP binding [GO:0005524];phosphomethylpyrimidine kinase activity [GO:0008972]	Enzyme
Q2FWE4	Q2FWE4_C69	ETGVTFAFQGUEHINR	SAOUHSC_02355	UPF0340 protein SAOUHSC_02355	no	1.70602		+	0.483361	0.245617	0.388024	0.578697	0.730227	0.485641	0	not assigned
Q2G0I3	Q2G0I3_C91	LFTGDEGSHUQIAR	SAOUHSC_00582	Uncharacterized protein	no	2.50532		+	0.480314	0.340733	0.44159	0.593019	0.519039	0.473595	DNA binding [GO:0003677]	Gene expression and Nucleic acid binding
Q2G1Z3	Q2G1Z3_C260	TGKPLLVTYDLUR	SAOUHSC_00652	Iron compound ABC transporter. ATP-binding protein	no	1.94038		+	0.478581	0.254409	0.426493	0.648834	0.53067	0.465101	ATPase activity [GO:0016887];ATP binding [GO:0005524]	not assigned
Q2G0S8	Q2G0S8_C139	IGTDIPFUIYNK	SAOUHSC_00466	Putative 4-diphosphocytidyl-2-C-methyl-D-erythritol kinase	no	2.09046		+	0.476954	0.29678	0.406754	0.547154	0.635987	0.471669	4-(cytidine 5'-diphospho)-2-C-methyl-D-erythritol kinase activity [GO:0050515];ATP binding [GO:0005524]	Enzyme			Active site						Functional site
Q2FZZ3	Q2FZZ3_C28	DVTTFYEEDKHLIFGYTPTUGTCK	SAOUHSC_00841	Uncharacterized protein	no	1.03859			0.473839		0.151846	0.59582	0.473839	0.407168	oxidoreductase activity. acting on a sulfur group of donors. disulfide as acceptor [GO:0016671];protein disulfide oxidoreductase activity [GO:0015035];protein-disulfide reductase activity [GO:0047134];thioredoxin-disulfide reductase activity [GO:0004791]	Enzyme
Q2G164	Q2G164_C62	AYVLNEDYPIVUIGAANVDR	SAOUHSC_00291	PfkB family carbohydrate kinase family. putative	no	0.420722			0.473278	0.152119			0.794437	0.473278	kinase activity [GO:0016301];phosphotransferase activity. alcohol group as acceptor [GO:0016773];sequence-specific DNA binding [GO:0043565]	Enzyme
Q53727	Q53727_C597	IUYVAITR	pcrA	ATP-dependent DNA helicase PcrA	yes	1.26755			0.473179	0.0670674	0.365998	0.701225	0.58036	0.428663	ATP binding [GO:0005524];ATP-dependent DNA helicase activity [GO:0004003];DNA binding [GO:0003677]	Gene expression and Nucleic acid binding
Q2G0W1	Q2G0W1_C640	LLAMIUNRPNVR	SAOUHSC_00413	UPF0753 protein SAOUHSC_00413	no	0.954913			0.46634	0.0965317	0.46634	0.496207		0.353026	0	not assigned
Q2G0T3	Q2G0T3_C69	ELTYCSVCGHITENDPUYICEDKQR	recR	Recombination protein RecR	no	1.70347		+	0.465829	0.449429	0.482229	0.70248	0.208642	0.460695	DNA binding [GO:0003677];metal ion binding [GO:0046872]	Gene expression and Nucleic acid binding
Q2G1Z3	Q2G1Z3_C40	VTSIIGPNGUGK	SAOUHSC_00652	Iron compound ABC transporter. ATP-binding protein	no	1.92919		+	0.462605	0.391548	0.265557	0.648926	0.533663	0.459923	ATPase activity [GO:0016887];ATP binding [GO:0005524]	not assigned						Nucleotide binding			Functional site
Q2FY08	Q2FY08_C137	IIDDEGIVUPVSK	glyQS	Glycine--tRNA ligase	yes	2.97049		+	0.448367	0.464039	0.489486	0.432695	0.33404	0.430065	ATP binding [GO:0005524];glycine-tRNA ligase activity [GO:0004820];protein dimerization activity [GO:0046983]	Modulator/Scaffolding/Adaptor
Q2FZ02	Q2FZ02_C147	ERPDILIGVCGUMSQEESVVNK	miaB	tRNA-2-methylthio-N(6)-dimethylallyladenosine synthase	no	0.972511			0.445515	0.326882		1.01214	0.445515	0.594846	4 iron. 4 sulfur cluster binding [GO:0051539];metal ion binding [GO:0046872];transferase activity [GO:0016740]	not assigned								Metall binding	Functional site
Q2FVV9	Q2FVV9_C48	SQDTFVPSICYNESMGPIQTUDTCTVEIDGK	SAOUHSC_02582	Putative formate dehydrogenase SAOUHSC_02582	no	0.411438			0.442065	0.133695	0.750435			0.442065	2 iron. 2 sulfur cluster binding [GO:0051537];4 iron. 4 sulfur cluster binding [GO:0051539];electron transfer activity [GO:0009055];formate dehydrogenase (NAD+) activity [GO:0008863];iron-sulfur cluster binding [GO:0051536];metal ion binding [GO:0046872];molybdopterin cofactor binding [GO:0043546];NADH dehydrogenase activity [GO:0003954]	Enzyme								Metall binding	Functional site
Q2FZT6	Q2FZT6_C784	FEGYQQUPFK	addB	ATP-dependent helicase/deoxyribonuclease subunit B	no	1.33948		+	0.438072	0.367169	0.178316	0.867106	0.508975	0.480392	4 iron. 4 sulfur cluster binding [GO:0051539];ATP binding [GO:0005524];ATP-dependent DNA helicase activity [GO:0004003];DNA binding [GO:0003677];exonuclease activity [GO:0004527];metal ion binding [GO:0046872]	Gene expression and Nucleic acid binding								Metall binding	Functional site
Q2FZ66	Q2FZ66_C300	GLNUHVNLIPVNHVPER	rlmN	Probable dual-specificity RNA methyltransferase RlmN	no	2.06692		+	0.437473	0.349479	0.627607	0.316146	0.525468	0.454675	4 iron. 4 sulfur cluster binding [GO:0051539];metal ion binding [GO:0046872];rRNA (adenine-C2-)-methyltransferase activity [GO:0070040];rRNA methyltransferase activity [GO:0008649];tRNA methyltransferase activity [GO:0008175]	Gene expression and Nucleic acid binding
Q2FYR0	Q2FYR0_C12	FVFDIDGTLUFDGR	SAOUHSC_01375	Uncharacterized protein	no	0.784147			0.433697	0.319155	0.548239			0.433697	hydrolase activity [GO:0016787]	not assigned
Q2FYZ0	Q2FYZ0_C82	DQGFVILGFPCNQFGGQEPGSGEEAAQNUK	SAOUHSC_01282	Glutathione peroxidase	no	1.49146		+	0.432896	0.10165	0.363564	0.502229	0.542803	0.377561	glutathione peroxidase activity [GO:0004602]	Enzyme
Q2FXD2	Q2FXD2_C82	IIIQVTATUK	SAOUHSC_01931	Uncharacterized protein	no	0.643239			0.432067	0.593306	0.270828			0.432067	0	not assigned
Q2FZC6	Q2FZC6_C143	INPHVEVHGVAUPGFVPLVEQMR	murI	Glutamate racemase	yes	2.00475		+	0.428681	0.243292	0.44301	0.596363	0.414352	0.424254	glutamate racemase activity [GO:0008881]	Enzyme
Q2FXZ6	Q2FXZ6_C47	VDFEANADVFVINTUTVTNTGDKK	SAOUHSC_01679	Uncharacterized protein	no	0.812342			0.428035	0.332164	0.428035		1.29031	0.683502	4 iron. 4 sulfur cluster binding [GO:0051539];N6-threonylcarbomyladenosine methylthiotransferase activity [GO:0035598]	Enzyme
Q2G1D8	Q2G1D8_C414	ESYGDDYGIACUVSAMTIGK	pflB	Formate acetyltransferase	no	2.22358		+	0.418378	0.619742	0.432883	0.403873	0.319166	0.443916	formate C-acetyltransferase activity [GO:0008861]	Enzyme			Active site						Functional site
Q2FV62	Q2FV62_C235	GAVFVNUAR	SAOUHSC_02875	D-lactate dehydrogenase. putative	no	1.75254		+	0.418223	0.131721	0.444349	0.403486	0.432959	0.353129	D-lactate dehydrogenase activity [GO:0008720];NAD binding [GO:0051287]	Enzyme
Q2G292	Q2G292_C129	VLNGUHLGGGLHHAQPGR	SAOUHSC_01849	Uncharacterized protein	no	1.47238		+	0.416102	0.213627	0.241962	0.647637	0.590243	0.423367	0	not assigned
Q2G2W9	Q2G2W9_C203	LMUCLKYENDYYEEVR	SAOUHSC_00455	Uncharacterized protein	no	1.93709		+	0.415867	0.361993	0.415867	0.521955		0.433272	0	not assigned
Q2FZC7	Q2FZC7_C100	QSUSAIVDQLEQPIR	SAOUHSC_01105	Iron-sulphur subunit of succinate dehydrogenase. putative	no	1.52019		+	0.413345	0.136578	0.372885	0.453805	0.630376	0.398411	electron transfer activity [GO:0009055];iron-sulfur cluster binding [GO:0051536]	not assigned	membrane/cell wall
Q2G292	Q2G292_C147	ASGFUIYNDIAITAQYLAK	SAOUHSC_01849	Uncharacterized protein	no	2.68371		+	0.398898	0.351402	0.398898	0.408277		0.386192	0	not assigned
Q2G1C4	Q2G1C4_C229	IDHAFEUVGGK	tarJ'	Ribulose-5-phosphate reductase 2	no	1.52579		+	0.395482	0.200964	0.231669	0.559296	0.560226	0.388039	metal ion binding [GO:0046872];ribitol-5-phosphate 2-dehydrogenase activity [GO:0050256]	Enzyme
Q2FZV6	Q2FZV6_C284	FDMUGAANVVGIIEAASR	SAOUHSC_00879	Probable cytosol aminopeptidase	no	1.93796		+	0.394944	0.458195	0.233397	0.331694	0.558799	0.395521	aminopeptidase activity [GO:0004177];manganese ion binding [GO:0030145];metalloexopeptidase activity [GO:0008235]	Enzyme
Q2FZU6	Q2FZU6_C353	PYUEALKEEGLLCK	rocD	Ornithine aminotransferase	no	2.78646		+	0.386554	0.313977	0.46565	0.34415	0.428959	0.388184	identical protein binding [GO:0042802];ornithine-oxo-acid transaminase activity [GO:0004587];pyridoxal phosphate binding [GO:0030170]	Enzyme
Q2FZ04	Q2FZ04_C199	LIEDAINHDGFSFVNVFSPUVTYNK	SAOUHSC_01267	Uncharacterized protein	no	2.2257		+	0.385928	0.385928	0.354001		0.458592	0.399507	catalytic activity [GO:0003824];thiamine pyrophosphate binding [GO:0030976]	Enzyme
Q2FWL8	Q2FWL8_C12	MIHELGTVGMVUPFPLIEAQK	SAOUHSC_02271	Uncharacterized protein	no	0.702314			0.381028	-0.108703	0.674865	0.771209	0.0871912	0.35614	0	not assigned
Q2G1J4	Q2G1J4_C258	VNIHQPGPGVGGHULAVDPYFIIAK	SAOUHSC_00128	Cap5O protein/UDP-N-acetyl-D-mannosaminuronic acid dehydrogenase	no	1.47895		+	0.379972	0.126022	0.376451	0.383493	0.617208	0.375793	NAD binding [GO:0051287];oxidoreductase activity. acting on the CH-CH group of donors. NAD or NADP as acceptor [GO:0016628];oxidoreductase activity. acting on the CH-OH group of donors. NAD or NADP as acceptor [GO:0016616]	Enzyme
Q2FVV9	Q2FVV9_C264	TVUTYCGVGCSFEVWTK	SAOUHSC_02582	Putative formate dehydrogenase SAOUHSC_02582	no	0.933414			0.377869	0.447844	0.307895			0.377869	2 iron. 2 sulfur cluster binding [GO:0051537];4 iron. 4 sulfur cluster binding [GO:0051539];electron transfer activity [GO:0009055];formate dehydrogenase (NAD+) activity [GO:0008863];iron-sulfur cluster binding [GO:0051536];metal ion binding [GO:0046872];molybdopterin cofactor binding [GO:0043546];NADH dehydrogenase activity [GO:0003954]	Enzyme								Metall binding	Functional site
Q2FUX1	Q2FUX1_C239	LISQSUIK	SAOUHSC_02974	Uncharacterized protein	no	1.04144			0.375171	0.321235	0.429107			0.375171	kinase activity [GO:0016301];protein-N(PI)-phosphohistidine-sugar phosphotransferase activity [GO:0008982]	Receptor/Transporter/Channel
Q2G124	Q2G124_C88	VUGSGLK	SAOUHSC_00336	Probable acetyl-CoA acyltransferase	yes	1.46703		+	0.374562	0.143175	0.256835	0.492289	0.560036	0.363084	acetyl-CoA C-acetyltransferase activity [GO:0003985];acetyl-CoA C-acyltransferase activity [GO:0003988]	Enzyme			Active site						Functional site
Q2FW45	Q2FW45_C11	MEIHVYTGPLUGFNEYINSEVK	SAOUHSC_02472	Uncharacterized protein	no	1.19048			0.373955	0.411968	0.335941			0.373955	ATP binding [GO:0005524]	not assigned
Q2FUW7	Q2FUW7_C286	YIDFFITATDIQNHMVUR	gtf1	Glycosyltransferase Gtf1	no	2.45564		+	0.371392	0.366476	0.371392	0.438612		0.39216	transferase activity. transferring hexosyl groups [GO:0016758]	Enzyme	membrane/cell wall
Q2FZ31	Q2FZ31_C52	FAELVUSNSLR	trmFO	Methylenetetrahydrofolate--tRNA-(uracil-5-)-methyltransferase TrmFO	no	1.31269		+	0.370616	0.0858249	0.255804	0.552377	0.485427	0.344858	flavin adenine dinucleotide binding [GO:0050660];methylenetetrahydrofolate-tRNA-(uracil-5-)-methyltransferase (FADH2-oxidizing) activity [GO:0047151]	Gene expression and Nucleic acid binding
Q2G1S4	Q2G1S4_C357	ELKUPVIALSQLSR	SAOUHSC_00018	Replicative DNA helicase	yes	1.99301		+	0.369295	0.240742	0.33674	0.401849	0.555129	0.383615	ATP binding [GO:0005524];DNA binding [GO:0003677];DNA helicase activity [GO:0003678]	Gene expression and Nucleic acid binding
Q2FWY1	Q2FWY1_C118	AEPVGUTATILYK	ppaC	Probable manganese-dependent inorganic pyrophosphatase	yes	1.67575		+	0.369012	0.208018	0.242328	0.522859	0.495695	0.367225	inorganic diphosphatase activity [GO:0004427];metal ion binding [GO:0046872]	Enzyme
Q2G0I5	Q2G0I5_C36	KLEKLDPDAEIVIGUQSYCGPGR	SAOUHSC_00580	UPF0741 protein SAOUHSC_00580	no	1.82835		+	0.368449	0.434348	0.140517	0.385044	0.351854	0.327941	0	not assigned
Q2G0M6	Q2G0M6_C198	SNUGLGFK	araB	Ribulokinase	no	3.90254		+	0.365798	0.361544	0.402722	0.370053	0.334111	0.367107	ATP binding [GO:0005524];ribulokinase activity [GO:0008741]	Enzyme
Q2FYF3	Q2FYF3_C14	VESIIIGGGPUGLSAAIEQK	SAOUHSC_01499	Uncharacterized protein	no	1.95081		+	0.362427	0.182047	0.38583	0.476882	0.339023	0.345945	oxidoreductase activity [GO:0016491]	Enzyme
Q2G1X7	Q2G1X7_C33	TAGUDYR	queE	7-carboxy-7-deazaguanine synthase	no	1.7041		+	0.362294	0.210763	0.443394	0.581303	0.281194	0.379164	4 iron. 4 sulfur cluster binding [GO:0051539];carbon-nitrogen lyase activity [GO:0016840];magnesium ion binding [GO:0000287];S-adenosyl-L-methionine binding [GO:1904047]	Enzyme				Binding site				Metall binding	Functional site
Q2FZX5	Q2FZX5_C292	SMNHITEAAYLLAQSVUEYTHAQCAIINAGLLVK	SAOUHSC_00860	5-nucleotidase family protein	no	0.719238			0.361863	0.473735	0.249991			0.361863	hydrolase activity [GO:0016787];nucleotide binding [GO:0000166]	not assigned
Q2FZ18	Q2FZ18_C438	SVUINGIITSILLNAKPHEVK	SAOUHSC_01253	Uncharacterized protein	no	1.31446		+	0.355367	0.376624	0.334111	0.106616	0.667483	0.371209	ATP binding [GO:0005524];DNA binding [GO:0003677]	Gene expression and Nucleic acid binding	membrane/cell wall					Nucleotide binding			Functional site
Q2G0Y7	Q2G0Y7_C307	VGIGPGSIUTTR	guaB	Inosine-5'-monophosphate dehydrogenase	no	1.31005		+	0.351464	0.323197	0.379732	0.170951	0.773237	0.411779	IMP dehydrogenase activity [GO:0003938];metal ion binding [GO:0046872]	Enzyme			Active site	Binding site		Nucleotide binding		Metall binding	Functional site
Q2FXP2	Q2FXP2_C153	GVNDNQLDIEAFDIFSNASUTTNCIGPVAK	SAOUHSC_01794	Glyceraldehyde-3-phosphate dehydrogenase	no	1.09696			0.351067	0.205518	0.0473988	0.622368	0.496616	0.342975	NAD binding [GO:0051287];NADP binding [GO:0050661];oxidoreductase activity. acting on the aldehyde or oxo group of donors. NAD or NADP as acceptor [GO:0016620]	Enzyme			Active site						Functional site
Q2FXE1	Q2FXE1_C70	ASEGLYUHHISEDKFQNLSDLR	SAOUHSC_01922	Uncharacterized protein	no	2.20701		+	0.348686	0.348686	0.392757		0.297837	0.346427	0	not assigned
Q2FZ73	Q2FZ73_C248	IPFFGIULGHQLFALSQGASSFK	carA	Carbamoyl-phosphate synthase small chain	no	1.59496		+	0.348676	0.200755	0.307895	0.634779	0.389457	0.383221	ATP binding [GO:0005524];carbamoyl-phosphate synthase (glutamine-hydrolyzing) activity [GO:0004088]	Enzyme			Active site						Functional site
Q2FY32	Q2FY32_C53	LTIPEIFUK	aroK	Shikimate kinase	no	1.78275		+	0.348494	0.351061	0.163544	0.506328	0.345927	0.341715	ATP binding [GO:0005524];magnesium ion binding [GO:0000287];shikimate kinase activity [GO:0004765]	Enzyme
Q2G1D8	Q2G1D8_C413	ESYGDDYGIAUCVSAMTIGK	pflB	Formate acetyltransferase	no	1.66727		+	0.341453	0.268121	0.165596	0.414785	0.513383	0.340472	formate C-acetyltransferase activity [GO:0008861]	Enzyme			Active site						Functional site
Q2G069	Q2G069_C224	QPLEYPSUGSVFQRPPGHFAGK	murB	UDP-N-acetylenolpyruvoylglucosamine reductase	yes	1.5623		+	0.341376	0.093065	0.357366	0.325386	0.450963	0.306695	flavin adenine dinucleotide binding [GO:0050660];UDP-N-acetylmuramate dehydrogenase activity [GO:0008762]	Enzyme			Active site						Functional site
Q2G1D8	Q2G1D8_C653	IPYDUCK	pflB	Formate acetyltransferase	no	2.22256		+	0.339146	0.291986	0.288998	0.5138	0.386307	0.370273	formate C-acetyltransferase activity [GO:0008861]	Enzyme
Q2G2W9	Q2G2W9_C166	SLUCSTFLGDFEPVSIK	SAOUHSC_00455	Uncharacterized protein	no	1.13489			0.334111	0.241108	0.334111		0.621055	0.398758	0	not assigned
Q2FWN7	Q2FWN7_C86	DLIVVNIGUGLDTR	SAOUHSC_02245	Uncharacterized protein	no	1.83136		+	0.33063	0.14091	0.319502	0.341758	0.430392	0.308141	methyltransferase activity [GO:0008168]	not assigned
Q2G111	Q2G111_C16	VUYFTANGITHIDYK	rpsR	30S ribosomal protein S18	yes	1.28726			0.329477	0.0229004	0.346985	0.429	0.311968	0.277713	rRNA binding [GO:0019843];structural constituent of ribosome [GO:0003735]	Modulator/Scaffolding/Adaptor
Q2FV58	Q2FV58_C110	SHAUYQGVTHACTNR	crtQ	4.4'-diaponeurosporenoate glycosyltransferase	no	2.09607		+	0.328486	0.332622	0.32435			0.328486	transferase activity [GO:0016740];transferase activity. transferring glycosyl groups [GO:0016757]	Enzyme	membrane/cell wall
Q2FVV9	Q2FVV9_C63	SUSTVIDRPMTVNTVNNDVK	SAOUHSC_02582	Putative formate dehydrogenase SAOUHSC_02582	no	1.37915		+	0.326217	0.216486	0.188781	0.658828	0.435949	0.375011	2 iron. 2 sulfur cluster binding [GO:0051537];4 iron. 4 sulfur cluster binding [GO:0051539];electron transfer activity [GO:0009055];formate dehydrogenase (NAD+) activity [GO:0008863];iron-sulfur cluster binding [GO:0051536];metal ion binding [GO:0046872];molybdopterin cofactor binding [GO:0043546];NADH dehydrogenase activity [GO:0003954]	Enzyme								Metall binding	Functional site
Q2G1Z8	Q2G1Z8_C1030	GUTGVKR	polC	DNA polymerase III PolC-type	yes	2.27726		+	0.323312	0.270589	0.348346	0.323312		0.314082	3'-5' exonuclease activity [GO:0008408];DNA binding [GO:0003677];DNA-directed DNA polymerase activity [GO:0003887]	Gene expression and Nucleic acid binding
Q2G0M6	Q2G0M6_C394	SVLSDSNLTGUIFGLTLQTK	araB	Ribulokinase	no	1.66698		+	0.322966	0.322966	0.393855	0.231064		0.315962	ATP binding [GO:0005524];ribulokinase activity [GO:0008741]	Enzyme
Q2FZJ1	Q2FZJ1_C188	GNVUGMMPHPER	purQ	Phosphoribosylformylglycinamidine synthase subunit PurQ	no	1.5678		+	0.321241	0.138946	0.255561	0.504671	0.386921	0.321525	ATP binding [GO:0005524];glutaminase activity [GO:0004359];phosphoribosylformylglycinamidine synthase activity [GO:0004642]	Enzyme			Active site						Functional site
Q2FY37	Q2FY37_C149	SSVUFDAPSWYELVVEGR	lipM	Octanoyltransferase LipM	no	3.6574		+	0.319951	0.280481	0.300651	0.339251	0.339251	0.314909	lipoyl(octanoyl) transferase activity [GO:0033819];octanoyl transferase activity (acting on glycine-cleavage complex H protein) [GO:0102555]	Enzyme			Active site						Functional site
Q2FZL3	Q2FZL3_C243	EQQFDNSWUAGFSMAALLNATK	sspB	Staphopain B	no	1.31139		+	0.319872	0.0339088	0.312746	0.326997	0.443878	0.279383	cysteine-type peptidase activity [GO:0008234]	Enzyme		secreted	Active site						Functional site
Q2FXF5	Q2FXF5_C10	TIYFIUTGNSCR	arsC	Arsenate reductase	no	0.466873			0.318438	-0.324076	0.303109	0.333767	0.510759	0.20589	arsenate reductase (thioredoxin) activity [GO:0030612];protein tyrosine phosphatase activity [GO:0004725]	Enzyme			Active site						Functional site
Q2FZS7	Q2FZS7_C160	EVHSEKVUEGK	SAOUHSC_00913	Uncharacterized protein	no	0.926335			0.317307	0.218943	0.415672	-0.0490539	0.562279	0.28696	DNA binding [GO:0003677];DNA binding transcription factor activity [GO:0003700]	Gene expression and Nucleic acid binding
Q2G0P6	Q2G0P6_C157	SLDISYDEQLGYLTTUPTNIGTGMR	mcsB	Protein-arginine kinase	no	2.22576		+	0.316317	0.319271			0.313362	0.316317	ATP binding [GO:0005524];kinase activity [GO:0016301];phosphotransferase activity. nitrogenous group as acceptor [GO:0016775]	Enzyme
Q2FZX4	Q2FZX4_C272	HUQAGPLVR	lipA	Lipoyl synthase	no	1.49481		+	0.315222	0.176523	0.182742	0.447702	0.50359	0.327639	4 iron. 4 sulfur cluster binding [GO:0051539];lipoate synthase activity [GO:0016992];metal ion binding [GO:0046872]	Enzyme
Q2G099	Q2G099_C193	VGDYUENRI	SAOUHSC_00722	Para-aminobenzoate synthase. glutamine amidotransferase. component II. putative	no	1.09415			0.314986	0.314986	0.468323	0.144569		0.309293	anthranilate synthase activity [GO:0004049];transferase activity [GO:0016740]	Enzyme
Q2FXA5	Q2FXA5_C451	VTGASFEAVGLPDUITQGK	SAOUHSC_01960	Protoporphyrinogen oxidase	no	0.895521			0.309592	-0.0781219	0.364348	0.254836	0.517931	0.264748	oxygen-dependent protoporphyrinogen oxidase activity [GO:0004729]	Enzyme
Q2FVA7	Q2FVA7_C95	VYMAULTEK	SAOUHSC_02826	Uncharacterized protein	no	0.870679			0.307591	0.326306	-0.0912793	0.527769	0.288877	0.262918	DNA binding transcription factor activity [GO:0003700];transcription regulatory region DNA binding [GO:0044212]	Gene expression and Nucleic acid binding
Q2FUV4	Q2FUV4_C147	NEGVSESUHGGIK	SAOUHSC_02997	Uncharacterized protein	no	0.974405			0.302636	0.000116863	0.181964	0.595802	0.423309	0.300298	aralkylamine N-acetyltransferase activity [GO:0004059]	Enzyme
Q2FZ13	Q2FZ13_C226	VVEHPDLFVETSTUTMEDFDYIIELR	SAOUHSC_01258	Uncharacterized protein	no	0.784446			0.301909	-0.0373992	0.167229	0.436588	0.869477	0.358974	0	not assigned
Q2FZC7	Q2FZC7_C55	ENLNVIAULMEIR	SAOUHSC_01105	Iron-sulphur subunit of succinate dehydrogenase. putative	no	1.33305		+	0.300291	0.0322419	0.314174	0.286408	0.394843	0.256917	electron transfer activity [GO:0009055];iron-sulfur cluster binding [GO:0051536]	not assigned	membrane/cell wall
Q2G2J2	Q2G2J2_C171	NLYTSGQUTYYVFDR	ssaA2	Staphylococcal secretory antigen ssaA2	yes	1.04795			0.29642	0.0894981	0.456386	0.136454	0.660929	0.335817	hydrolase activity [GO:0016787]	not assigned		secreted
Q2G1K9	Q2G1K9_C431	VLVNTPSAVGGIGDMYNELIPSLTLGUGSYGR	SAOUHSC_00113	Aldehyde-alcohol dehydrogenase	no	1.29146			0.296088	0.264356	0.284514	0.814017	0.307662	0.417637	acetaldehyde dehydrogenase (acetylating) activity [GO:0008774];alcohol dehydrogenase (NAD) activity [GO:0004022];metal ion binding [GO:0046872]	Enzyme
Q2FYW4	Q2FYW4_C377	SGVDVHLMIPUKPDHPLVYWATFSNASDLLSSGVK	SAOUHSC_01310	Cardiolipin synthase	no	0.651151			0.295488	-0.027175	0.374622		0.295488	0.214312	cardiolipin synthase activity [GO:0008808]	Enzyme	membrane/cell wall
Q2FV41	Q2FV41_C158	VNSLAYUSSK	SAOUHSC_02898	Uncharacterized protein	no	1.79356		+	0.291555	0.328032	0.11023	0.335941	0.255078	0.25732	oxidoreductase activity [GO:0016491]	Enzyme
Q2FZI3	Q2FZI3_C40	VLLLGPSGUGK	SAOUHSC_01021	Uncharacterized protein	no	1.19123			0.290186	0.322274	0.625364	0.0848807	0.258097	0.322654	ATPase activity [GO:0016887];ATP binding [GO:0005524]	not assigned						Nucleotide binding			Functional site
Q2FWN8	Q2FWN8_C257	EISEEDANYASGLTAVUSIINGGK	SAOUHSC_02244	Uncharacterized protein	no	0.589877			0.287354		-0.0246633	0.287354	0.636729	0.299807	metal ion binding [GO:0046872];metallopeptidase activity [GO:0008237]	Enzyme
Q2G2W8	Q2G2W8_C82	DNLAILYGEGFHIUK	SAOUHSC_00456	Initiation-control protein YabA	no	0.057655			0.285343	-0.66502	0.285343	0.579277		0.0665333	0	not assigned
Q2G268	Q2G268_C154	EDGYHFIEPGSGFLAUGYVAK	SAOUHSC_01178	Coenzyme A biosynthesis bifunctional protein CoaBC	yes	1.87534		+	0.285272	0.22786	0.325926	0.496481	0.244618	0.323721	FMN binding [GO:0010181];phosphopantothenate--cysteine ligase activity [GO:0004632];phosphopantothenoylcysteine decarboxylase activity [GO:0004633]	Enzyme
Q2FVQ5	Q2FVQ5_C63	LAQPGEESSNVWNNAGTGHSALUELNYTK	mqo	Probable malate:quinone oxidoreductase	no	1.5394		+	0.284797	0.179256	0.131721	0.397036	0.390338	0.274588	malate dehydrogenase (menaquinone) activity [GO:0052589];malate dehydrogenase (quinone) activity [GO:0008924]	Enzyme
Q2FYS9	Q2FYS9_C443	TGDIAIAAITSUTNTSNPYVMLGAGLVAK	SAOUHSC_01347	Aconitate hydratase	no	1.66813		+	0.284664	0.158596	0.227002	0.342327	0.466027	0.298488	4 iron. 4 sulfur cluster binding [GO:0051539];aconitate hydratase activity [GO:0003994]	Enzyme
Q2G1F0	Q2G1F0_C353	ITLAFDMNKUHFFDEK	SAOUHSC_00175	Multiple sugar-binding transport ATP-binding protein. putative	no	0.318963			0.28166		0.545968		0.0173518	0.28166	ATPase activity [GO:0016887];ATP binding [GO:0005524]	not assigned	membrane/cell wall
Q2FY71	Q2FY71_C19	SGISLSELGLGUMSLGTDLK	SAOUHSC_01594	Uncharacterized protein	no	2.87419		+	0.280632	0.245548	0.272729	0.288536	0.362179	0.292248	0	not assigned
Q2FZ30	Q2FZ30_C199	QSIENYLEHFKPIQSUNHDFLIVNMK	xerC	Tyrosine recombinase XerC	no	1.09744			0.280108		0.244765	0.31545		0.280108	DNA binding [GO:0003677]	Gene expression and Nucleic acid binding
Q7X2S2	Q7X2S2_C78	SNSDTTPAMPLDTUGAMSQGMIGYWLETEINR	arcC2	Carbamate kinase 2	no	1.2499			0.279293	0.0306892	0.278936	0.443819	0.27965	0.258273	ATP binding [GO:0005524];carbamate kinase activity [GO:0008804]	Enzyme
Q2FYZ0	Q2FYZ0_C64	DQGFVILGFPUNQFGGQEPGSGEEAAQNCK	SAOUHSC_01282	Glutathione peroxidase	no	1.06641			0.273477	-0.0298845	0.361554	0.309758	0.237197	0.219656	glutathione peroxidase activity [GO:0004602]	Enzyme
Q2FWM2	Q2FWM2_C38	QIGGAPUNVACTVQK	SAOUHSC_02267	Fructokinase. putative	no	1.37194		+	0.273456	0.275245	0.129876		0.273456	0.226193	kinase activity [GO:0016301];phosphotransferase activity. alcohol group as acceptor [GO:0016773]	Enzyme
Q2FVT0	Q2FVT0_C55	GYNITGVUTSNK	rpiA	Ribose-5-phosphate isomerase A	yes	1.93221		+	0.271249	0.206018	0.28404	0.258459	0.458067	0.301646	ribose-5-phosphate isomerase activity [GO:0004751]	Enzyme
Q2FZJ4	Q2FZJ4_C44	VVVLDPSEDUPCR	purK	N5-carboxyaminoimidazole ribonucleotide synthase	no	1.17035			0.270506	0.0371713	0.303693	0.505688	0.237319	0.270968	5-(carboxyamino)imidazole ribonucleotide synthase activity [GO:0034028];ATP binding [GO:0005524];metal ion binding [GO:0046872];NAD binding [GO:0051287];phosphoribosylaminoimidazole carboxylase activity [GO:0004638]	Enzyme
Q2FZ02	Q2FZ02_C453	YEGQTVTVLUEGSSK	miaB	tRNA-2-methylthio-N(6)-dimethylallyladenosine synthase	no	0.894959			0.269286	-0.0259847	0.153416	0.55218	0.385155	0.266192	4 iron. 4 sulfur cluster binding [GO:0051539];metal ion binding [GO:0046872];transferase activity [GO:0016740]	not assigned
Q2FVF1	Q2FVF1_C32	GVSFEUPIGATIAIIGESGSGK	SAOUHSC_02763	Peptide ABC transporter. ATP-binding protein. putative	no	1.51004		+	0.266037	0.266037	0.156397	0.300065		0.240833	ATPase activity [GO:0016887];ATP binding [GO:0005524]	not assigned
Q2FZV8	Q2FZV8_C37	VNGGGUTGLTYGMGAEEAPGENDEVLEYFGLK	SAOUHSC_00877	Uncharacterized protein	no	0.797766			0.265677	0.0308304	0.379288		0.265677	0.225265	iron-sulfur cluster binding [GO:0051536];structural molecule activity [GO:0005198]	Modulator/Scaffolding/Adaptor
Q2G1K9	Q2G1K9_C370	QAFQIUEDTLHFGGLGHTAVIHTEDETLQK	SAOUHSC_00113	Aldehyde-alcohol dehydrogenase	no	0.840819			0.262495	0.387693	-0.0184731	0.658738	0.137297	0.291314	acetaldehyde dehydrogenase (acetylating) activity [GO:0008774];alcohol dehydrogenase (NAD) activity [GO:0004022];metal ion binding [GO:0046872]	Enzyme
Q2FXT6	Q2FXT6_C269	GMDMFDUVLPTR	tgt	Queuine tRNA-ribosyltransferase	no	1.11232			0.260568	0.0429244	0.140517	0.439464	0.380619	0.250881	metal ion binding [GO:0046872];queuine tRNA-ribosyltransferase activity [GO:0008479]	Gene expression and Nucleic acid binding			Active site						Functional site
Q2FY10	Q2FY10_C245	IQEELNYFEEIVSEIGUPVIDVSQK	SAOUHSC_01664	Putative pyruvate. phosphate dikinase regulatory protein	no	1.43141		+	0.259602	0.0997665	0.16543	0.384713	0.353775	0.250921	ATP binding [GO:0005524];protein serine/threonine kinase activity [GO:0004674]	Enzyme
Q2FZV8	Q2FZV8_C103	QSLMGGGFQIDNPNAIASCGUGSSFR	SAOUHSC_00877	Uncharacterized protein	no	0.772935			0.259423	0.259423	0.237197	0.915712		0.470777	iron-sulfur cluster binding [GO:0051536];structural molecule activity [GO:0005198]	Modulator/Scaffolding/Adaptor
Q2FUY1	Q2FUY1_C110	EVNELCTALTDUTVLGLPR	arcR	HTH-type transcriptional regulator ArcR	no	0.211304			0.258941	-0.279056		0.378179	0.258941	0.119354	cAMP binding [GO:0030552];DNA binding [GO:0003677]	Gene expression and Nucleic acid binding						Nucleotide binding			Functional site
Q2FZ19	Q2FZ19_C153	NVNISFFNTTHSIPDSLGVUIHTSYGAIVYTGEFK	rnj2	Ribonuclease J 2	yes	0.502679			0.258843	0.119555	0.398131			0.258843	5'-3' exoribonuclease activity [GO:0004534];endoribonuclease activity [GO:0004521];RNA binding [GO:0003723];zinc ion binding [GO:0008270]	Gene expression and Nucleic acid binding
Q2G1M1	Q2G1M1_C155	IINATSQAGVEGNPGLSLYUSTK	SAOUHSC_00086	3-ketoacyl-acyl carrier protein reductase. putative	no	1.15147			0.25723	0.0302654	0.42417	0.172359	0.3421	0.242224	3-oxoacyl-[acyl-carrier-protein] reductase (NADPH) activity [GO:0004316];3-oxo-glutaryl-[acp] methyl ester reductase activity [GO:0102131];3-oxo-pimeloyl-[acp] methyl ester reductase activity [GO:0102132];acetoin dehydrogenase activity [GO:0019152]	Enzyme
[truncated: 1,261 more rows]

## Sheet: Hits
Leading razor protein	Identifier	Sequence	gene name	name	essential?	neg Log T-test p-value	Hit	T-test Significant	Median 100 µM	Ratio H/L 100vs100_1	Ratio H/L 100vs100_2	Ratio H/L 100vs100_3	Ratio H/L 100vs100_4	T-test Difference	Gene ontology (molecular function)	GO class	membrane/cell wall	secreted	Active site	Binding site	DNA binding	Nucleotide binding	Site	Metall binding	Functional site
[truncated: 18 more rows]
